# Supplementary material for: Disrupting hate: The effect of deplatforming hate organizations on their online audience
Source: PubMed Central journal article supplement (PMC10268571; doi:10.1073/pnas.2214080120), 2023-06-05
Supplement: pnas.2214080120.sapp.pdf [file pnas.2214080120.sapp.pdf]

# Appendix: Disrupting Hate: The Effect of Deplatforming Hate Organizations on their Online Audience

Daniel Robert Thomas, Laila A. Wahedi *Meta, Meta*

## Contents

|                                                                                                         |    |
|---------------------------------------------------------------------------------------------------------|----|
| Summary statistics by disruption                                                                        | 2  |
| Audience subgroup summaries                                                                             | 3  |
| Treatment status over time by organization                                                              | 5  |
| Summary statistics for outcomes with different data sets                                                | 6  |
| Plots of outcomes over time by disruption                                                               | 8  |
| F test comparisons for Two-Way Fixed Effects and Interactive Fixed Effects                              | 20 |
| Equivalence plots for main outcomes with short time frame and no sampled control groups                 | 22 |
| Placebo test results for main outcomes with short time frame and no sampled control groups              | 34 |
| Tabular results for average ATT for short time frame with no sampled control groups                     | 35 |
| Effects over time plots for all manuscript outcomes                                                     | 38 |
| Effect of disruptions on consumption and production of ideologically aligned content                    | 41 |
| Effect of disruptions on total engagement                                                               | 42 |
| Tabular results for average ATT for short time frame with sampled control groups                        | 43 |
| Tabular results for average ATT for long timeframe with sampled control groups                          | 45 |
| Effects over time plots for all manuscript outcomes for long timeframe with sampled control groups      | 48 |
| Two Way Fixed Effects (OLS) for manuscript outcomes for short time frame with no sampled control groups | 51 |
| Alternative Two Way Fixed Effects (OLS) models for ratio outcomes                                       | 54 |

|                                                                                                                                         |            |
|-----------------------------------------------------------------------------------------------------------------------------------------|------------|
| <b>OLS with only time fixed effects for short time frame with no sampled control groups</b>                                             | <b>56</b>  |
| <b>Two Way Fixed Effects (OLS) for short time frame with p-values from wild cluster bootstrapping</b>                                   | <b>59</b>  |
| <b>Organization comparison plots for backlash outcomes</b>                                                                              | <b>62</b>  |
| <b>Robustness: Dynamic differences-in-differences (Callaway and Sant'Anna 2021) for short time frame with no sampled control groups</b> | <b>66</b>  |
| <b>Robustness: Dynamic differences-in-differences (Callaway and Sant'Anna 2021) for short time frame with sampled control groups</b>    | <b>136</b> |
| <b>Robustness: Dynamic differences-in-differences (Callaway and Sant'Anna 2021) for long time frame with sampled control groups</b>     | <b>206</b> |
| <b>Tables of outcome variables aggregated at disruption and day level</b>                                                               | <b>316</b> |

## Summary statistics by disruption

| Disruption                | N    | Mean Age | SD Age | Mean Gender | SD Gender | Mean Days Since Creation | SD Days Since Creation |
|---------------------------|------|----------|--------|-------------|-----------|--------------------------|------------------------|
| Cluster 1                 | 863  | 44.71    | 15.28  | 1.59        | 0.51      | 3421                     | 1252                   |
| Cluster 2                 | 1578 | 41.68    | 14.50  | 1.62        | 0.50      | 3459                     | 1345                   |
| Cluster 3                 | 8100 | 39.42    | 15.52  | 1.61        | 0.51      | 3160                     | 1334                   |
| Cluster 4                 | 3974 | 43.20    | 14.10  | 1.62        | 0.50      | 3430                     | 1307                   |
| Cluster 5                 | 3336 | 40.68    | 14.68  | 1.65        | 0.49      | 3357                     | 1324                   |
| Cluster 6                 | 8508 | 35.42    | 14.30  | 1.78        | 0.44      | 3318                     | 1358                   |
| Sampled Cluster 1 Control | 158  | 33.67    | 12.49  | 1.68        | 0.47      | 1754                     | 1317                   |
| Sampled Cluster 2 Control | 177  | 34.85    | 15.83  | 1.71        | 0.45      | 1643                     | 1342                   |
| Sampled Cluster 3 Control | 239  | 34.27    | 14.96  | 1.61        | 0.50      | 1519                     | 1300                   |
| Sampled Cluster 4 Control | 181  | 33.69    | 12.02  | 1.65        | 0.49      | 1627                     | 1329                   |
| Sampled Cluster 5 Control | 198  | 34.34    | 12.58  | 1.63        | 0.48      | 1619                     | 1340                   |
| Sampled Cluster 6 Control | 196  | 34.10    | 14.73  | 1.61        | 0.51      | 1713                     | 1302                   |

Table A.1: Summary statistics for the demographics of the audiences

## Audience subgroup summaries

| Organization | Audience Level | N    | Mean Age | SD Age | Mean Gender | SD Gender | Mean Days Since Creation | SD Days Since Creation |
|--------------|----------------|------|----------|--------|-------------|-----------|--------------------------|------------------------|
| Cluster 1    | 1              | 285  | 45.95    | 15.83  | 1.65        | 0.49      | 3391                     | 1304                   |
| Cluster 1    | 2              | 356  | 44.21    | 14.38  | 1.60        | 0.50      | 3439                     | 1188                   |
| Cluster 1    | 3              | 222  | 43.94    | 15.90  | 1.51        | 0.54      | 3432                     | 1287                   |
| Cluster 2    | 1              | 489  | 44.76    | 15.26  | 1.62        | 0.50      | 3542                     | 1260                   |
| Cluster 2    | 2              | 655  | 39.70    | 13.06  | 1.63        | 0.50      | 3398                     | 1425                   |
| Cluster 2    | 3              | 434  | 41.21    | 15.12  | 1.59        | 0.51      | 3460                     | 1311                   |
| Cluster 3    | 1              | 1353 | 41.70    | 15.18  | 1.60        | 0.52      | 3362                     | 1311                   |
| Cluster 3    | 2              | 3522 | 38.27    | 14.87  | 1.62        | 0.50      | 3190                     | 1267                   |
| Cluster 3    | 3              | 3225 | 39.71    | 16.22  | 1.60        | 0.51      | 3042                     | 1402                   |
| Cluster 4    | 1              | 1082 | 42.98    | 13.03  | 1.64        | 0.49      | 3516                     | 1239                   |
| Cluster 4    | 2              | 1649 | 42.23    | 13.49  | 1.63        | 0.50      | 3461                     | 1304                   |
| Cluster 4    | 3              | 1243 | 44.68    | 15.60  | 1.58        | 0.51      | 3316                     | 1362                   |
| Cluster 5    | 1              | 721  | 42.49    | 14.89  | 1.67        | 0.49      | 3293                     | 1354                   |
| Cluster 5    | 2              | 1566 | 39.28    | 14.26  | 1.66        | 0.49      | 3368                     | 1320                   |
| Cluster 5    | 3              | 1049 | 41.53    | 14.97  | 1.63        | 0.49      | 3384                     | 1309                   |
| Cluster 6    | 1              | 1957 | 33.88    | 12.72  | 1.84        | 0.39      | 3243                     | 1362                   |
| Cluster 6    | 2              | 3346 | 34.71    | 14.07  | 1.79        | 0.43      | 3407                     | 1294                   |
| Cluster 6    | 3              | 3205 | 37.10    | 15.25  | 1.72        | 0.47      | 3271                     | 1415                   |

Table A.2: Subgroup demographics. Subgroups are largely similar within disruptions.

| Disruption | Subgroup | Number | Number friends with organization | Prop. friends with organization |
|------------|----------|--------|----------------------------------|---------------------------------|
| Cluster 4  | 1        | 1082   | 1041                             | 0.9621                          |
| Cluster 4  | 2        | 1649   | 1407                             | 0.8532                          |
| Cluster 4  | 3        | 1243   | 563                              | 0.4529                          |
| Cluster 1  | 1        | 285    | 260                              | 0.9123                          |
| Cluster 1  | 2        | 356    | 238                              | 0.6685                          |
| Cluster 1  | 3        | 222    | 92                               | 0.4144                          |
| Cluster 6  | 1        | 1957   | 1231                             | 0.6290                          |
| Cluster 6  | 2        | 3346   | 1514                             | 0.4525                          |
| Cluster 6  | 3        | 3205   | 1092                             | 0.3407                          |
| Cluster 3  | 1        | 1353   | 1213                             | 0.8965                          |
| Cluster 3  | 2        | 3522   | 2629                             | 0.7465                          |
| Cluster 3  | 3        | 3225   | 1754                             | 0.5439                          |
| Cluster 5  | 1        | 721    | 654                              | 0.9071                          |
| Cluster 5  | 2        | 1566   | 999                              | 0.6379                          |
| Cluster 5  | 3        | 1048   | 448                              | 0.4275                          |
| Cluster 2  | 1        | 489    | 467                              | 0.9550                          |
| Cluster 2  | 2        | 655    | 476                              | 0.7267                          |
| Cluster 2  | 3        | 434    | 207                              | 0.4770                          |

Table A.3: Relationship between subgroups and being friends with organization members. Those who engage more with the organization are also friends with at least one organization member more often than those who engage less.

Treatment status over time by organization

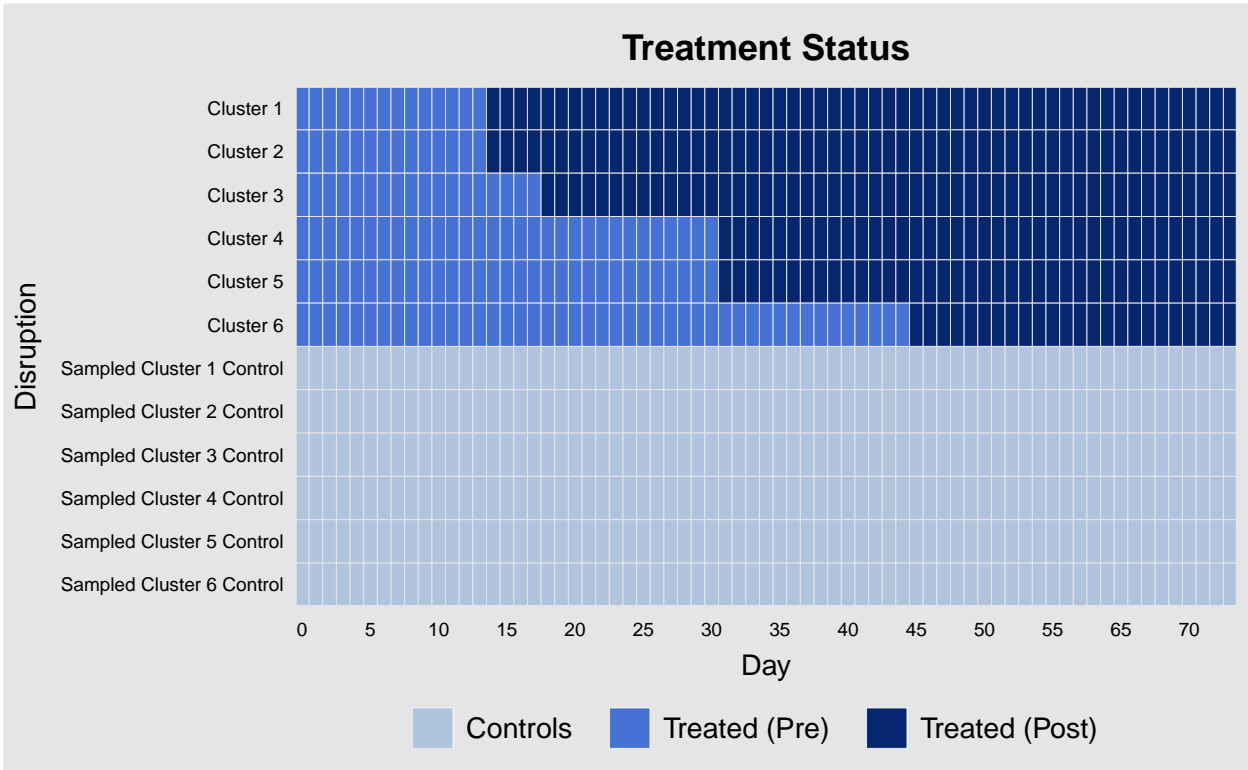

Figure A.1: Treatment status of organizations over time, including sampled control groups.

## Summary statistics for outcomes with different data sets

| Statistic                                         | N         | Mean  | St. Dev. | Min   | Max   |
|---------------------------------------------------|-----------|-------|----------|-------|-------|
| Views on hate content                             | 1,186,155 | 4.942 | 8.632    | 0     | 421   |
| Views on hate content/total views                 | 1,122,349 | 0.012 | 0.021    | 0.000 | 1.000 |
| Views on non-organization content that is hateful | 1,186,155 | 4.936 | 8.628    | 0     | 421   |
| Hateful comments by audience members              | 1,186,155 | 0.558 | 2.656    | 0     | 254   |
| Hateful comments/total comments                   | 743,156   | 0.034 | 0.101    | 0.000 | 1.000 |
| Hateful audience outdegree                        | 1,186,155 | 0.092 | 0.529    | 0     | 37    |
| Hateful non-audience outdegree                    | 1,186,155 | 0.845 | 3.112    | 0     | 277   |
| Audience indegree                                 | 1,186,155 | 1.270 | 6.155    | 0     | 653   |
| Audience outdegree                                | 1,186,155 | 1.274 | 3.865    | 0     | 223   |
| Audience indegree/total indegree                  | 916,080   | 0.054 | 0.137    | 0.000 | 1.000 |
| Audience outdegree/total outdegree                | 985,292   | 0.070 | 0.152    | 0.000 | 1.000 |

Table A.4: Summary statistics for outcome variables with primary (short timeframe) dataset.

| Statistic                                         | N         | Mean  | St. Dev. | Min   | Max   |
|---------------------------------------------------|-----------|-------|----------|-------|-------|
| Views on hate content                             | 1,237,860 | 4.777 | 8.516    | 0     | 421   |
| Views on hate content/total views                 | 1,169,553 | 0.012 | 0.021    | 0.000 | 1.000 |
| Views on non-organization content that is hateful | 1,237,860 | 4.772 | 8.513    | 0     | 421   |
| Hateful comments by audience members              | 1,237,860 | 0.535 | 2.603    | 0     | 254   |
| Hateful comments/total comments                   | 756,486   | 0.033 | 0.100    | 0.000 | 1.000 |
| Hateful audience outdegree                        | 1,237,860 | 0.088 | 0.518    | 0     | 37    |
| Hateful non-audience outdegree                    | 1,237,860 | 0.811 | 3.051    | 0     | 277   |
| Audience indegree                                 | 1,237,860 | 1.217 | 6.030    | 0     | 653   |
| Audience outdegree                                | 1,237,860 | 1.220 | 3.792    | 0     | 223   |
| Audience indegree/total indegree                  | 934,545   | 0.053 | 0.136    | 0.000 | 1.000 |
| Audience outdegree/total outdegree                | 1,012,522 | 0.068 | 0.150    | 0.000 | 1.000 |

Table A.5: Summary statistics for outcome variables with short timeframe dataset with sampled control groups.

| Statistic                                         | N         | Mean  | St. Dev. | Min   | Max   |
|---------------------------------------------------|-----------|-------|----------|-------|-------|
| Views on hate content                             | 1,897,610 | 4.375 | 7.900    | 0     | 421   |
| Views on hate content/total views                 | 1,782,250 | 0.011 | 0.020    | 0.000 | 1.000 |
| Views on non-organization content that is hateful | 1,897,610 | 4.372 | 7.897    | 0     | 421   |
| Hateful comments by audience members              | 1,897,610 | 0.501 | 2.472    | 0     | 254   |
| Hateful comments/total comments                   | 1,147,537 | 0.032 | 0.099    | 0.000 | 1.000 |
| Hateful audience outdegree                        | 1,897,610 | 0.078 | 0.479    | 0     | 37    |
| Hateful non-audience outdegree                    | 1,897,610 | 0.761 | 2.911    | 0     | 277   |
| Audience indegree                                 | 1,897,610 | 1.139 | 5.763    | 0     | 653   |
| Audience outdegree                                | 1,897,610 | 1.139 | 3.609    | 0     | 223   |
| Audience indegree/total indegree                  | 1,419,451 | 0.051 | 0.133    | 0.000 | 1.000 |
| Audience outdegree/total outdegree                | 1,542,687 | 0.064 | 0.143    | 0.000 | 1.000 |

Table A.6: Summary statistics for outcome variables with long timeframe dataset with sampled control groups.



## Plots of outcomes over time by disruption

*Views on hateful content*

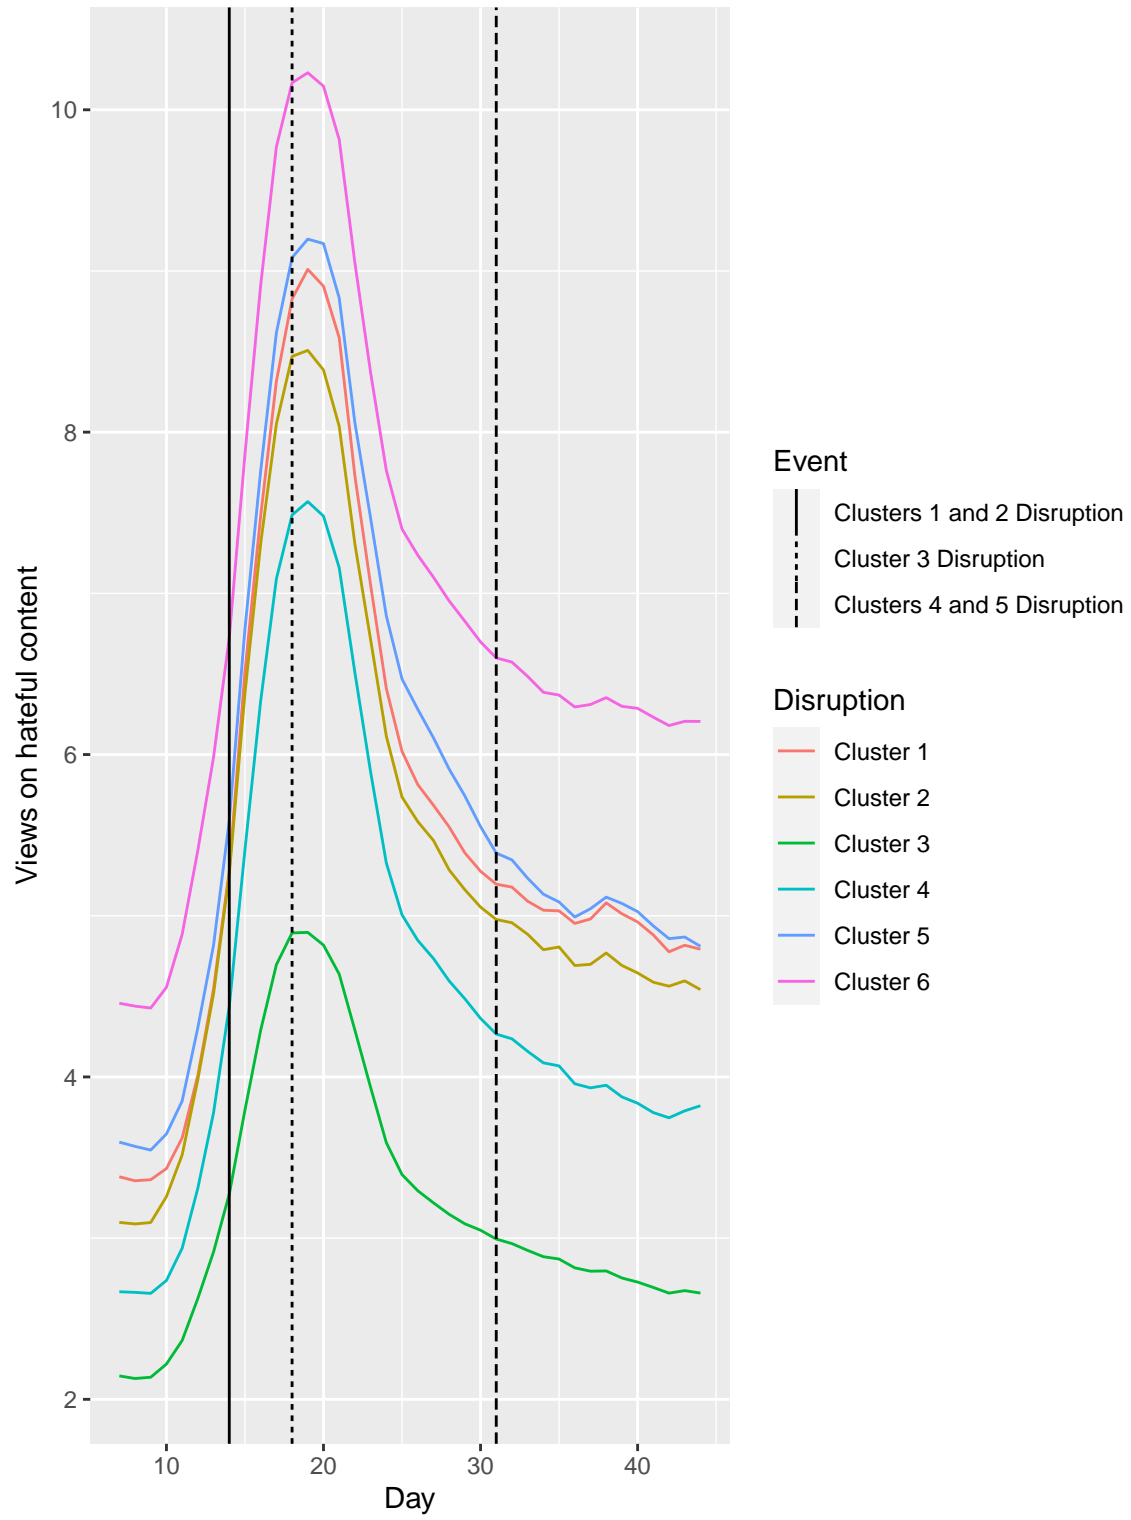

*Views on hateful content/total views*

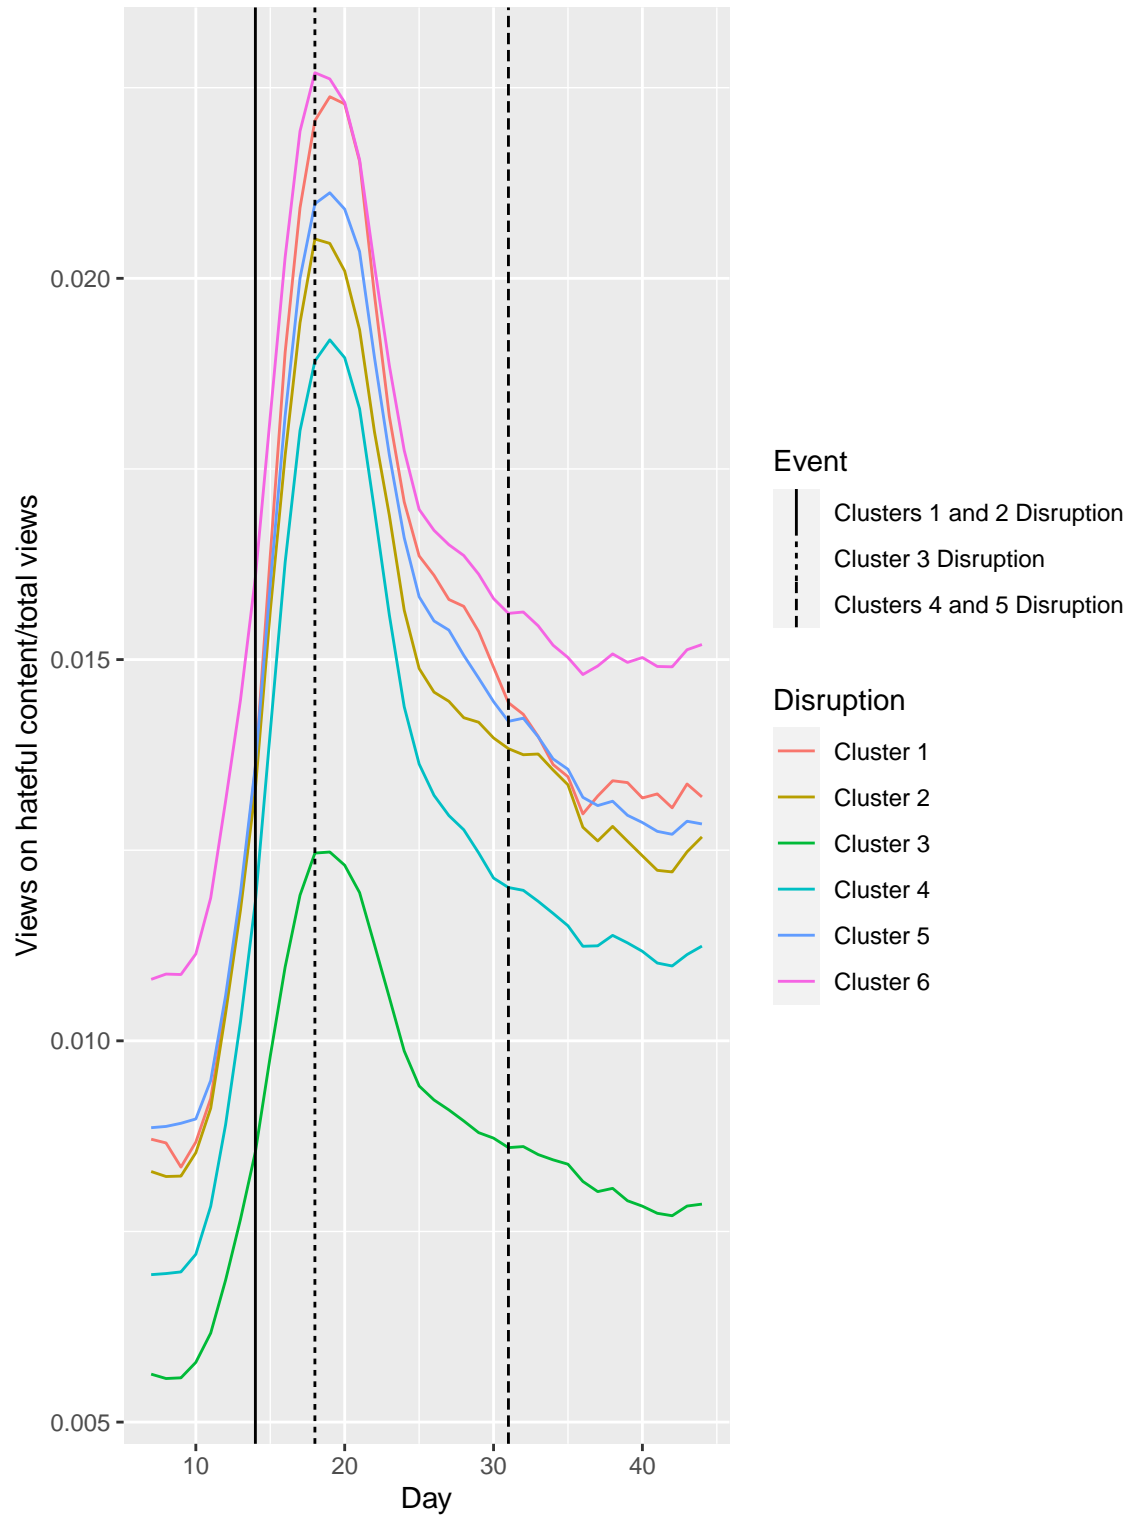

*Views on non-organization content that is hateful*

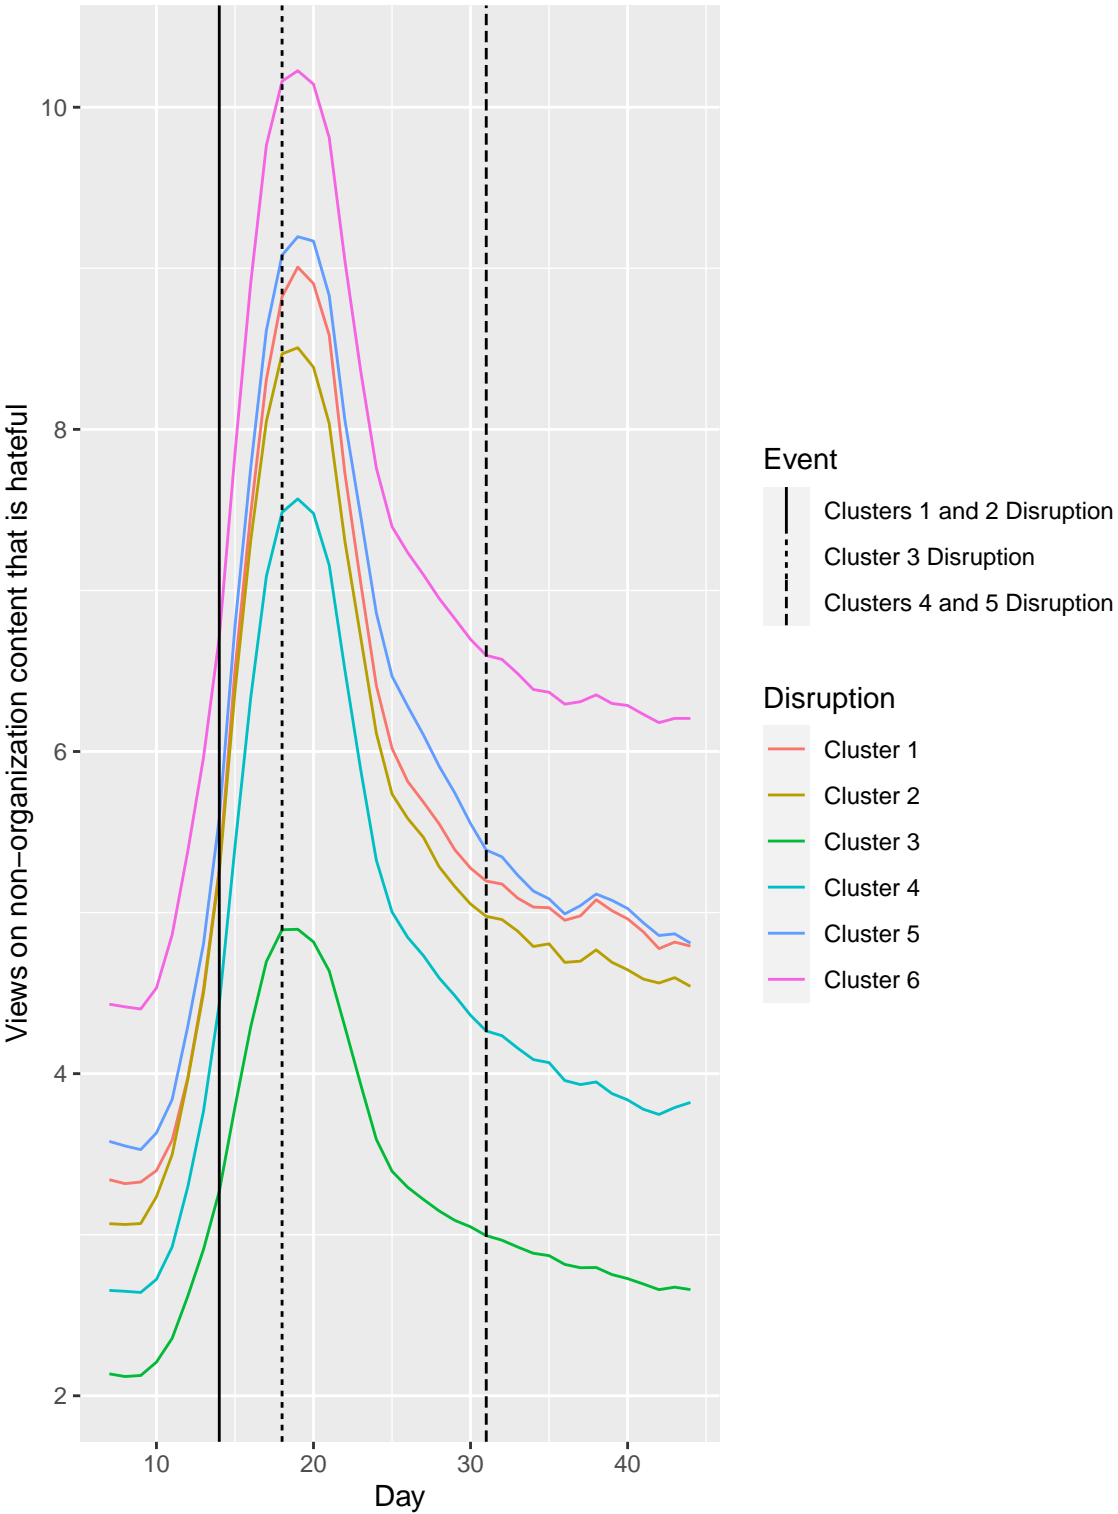

*Hateful comments by audience members*

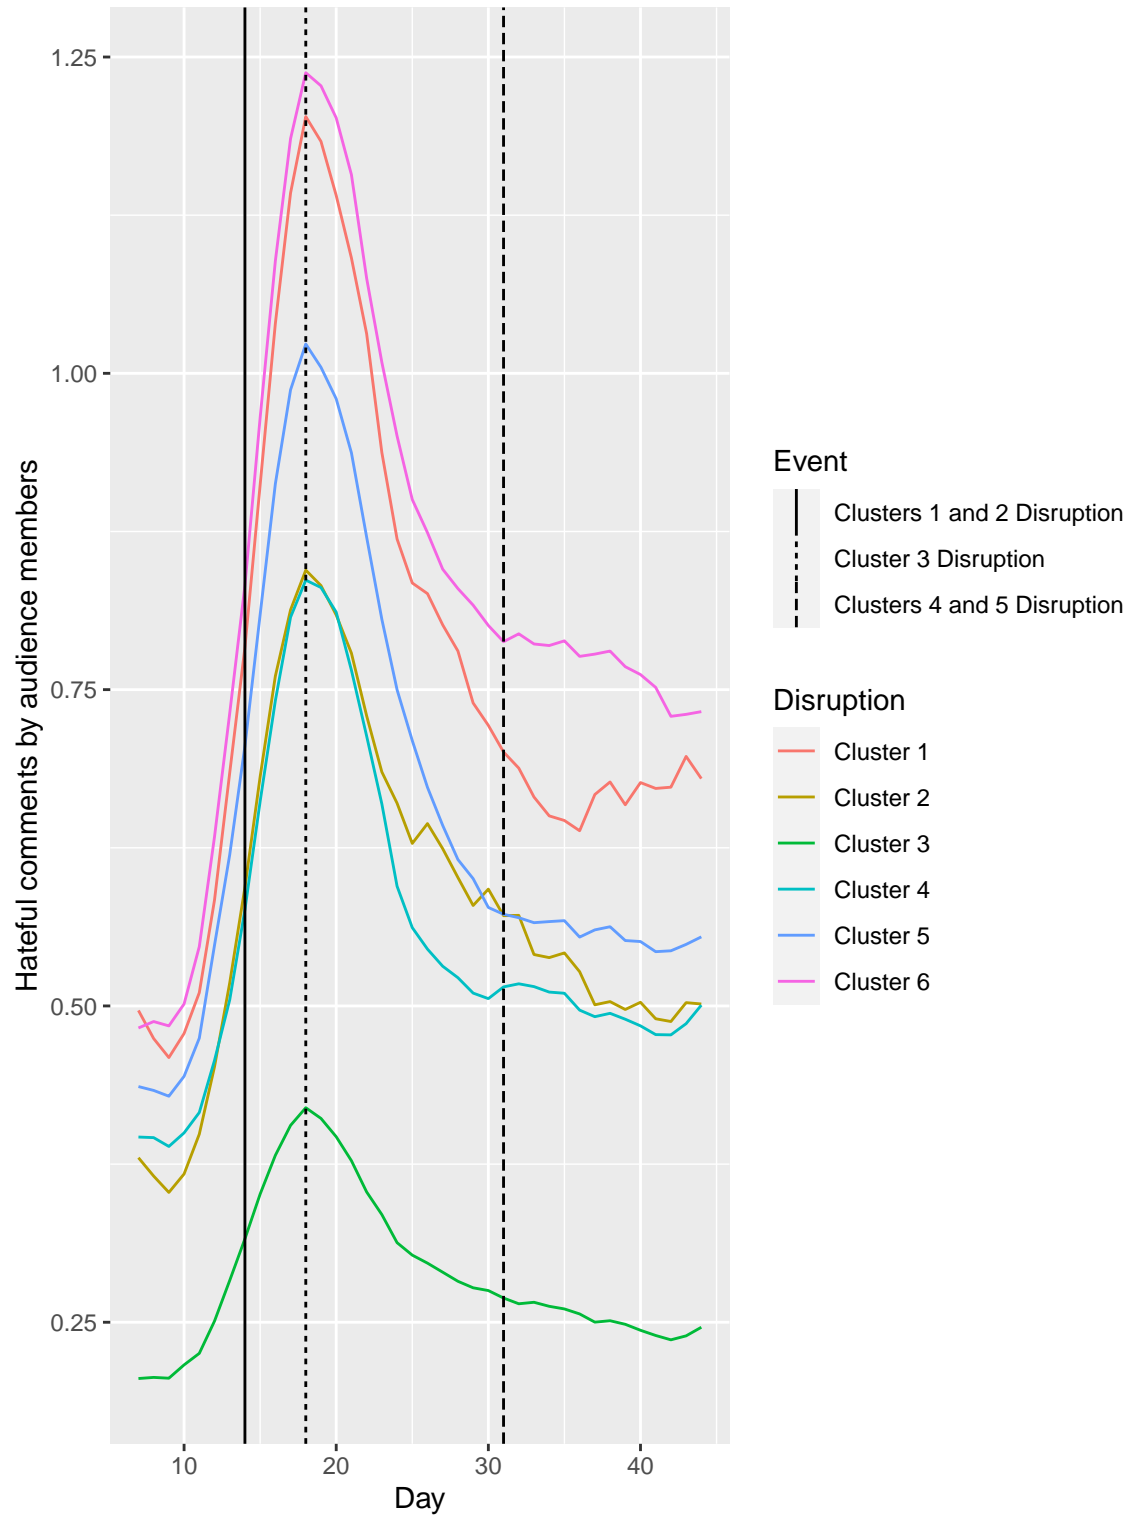

*Hateful comments/total comments*

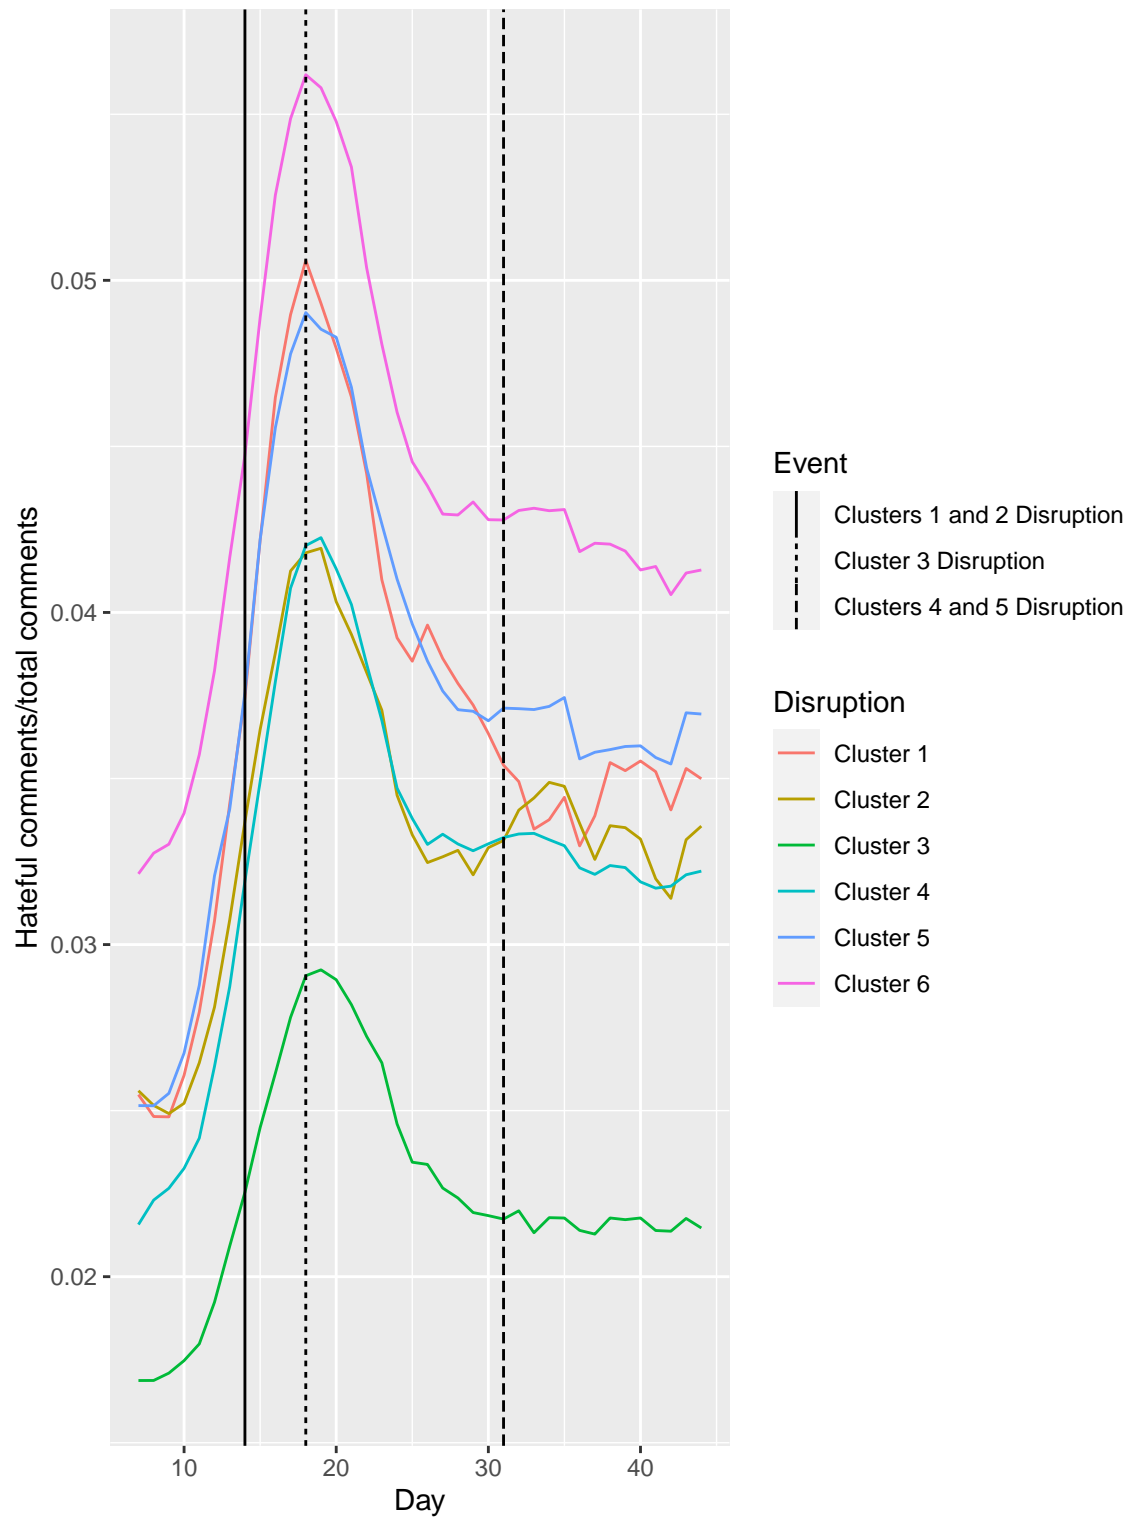

*Hateful audience outdegree*

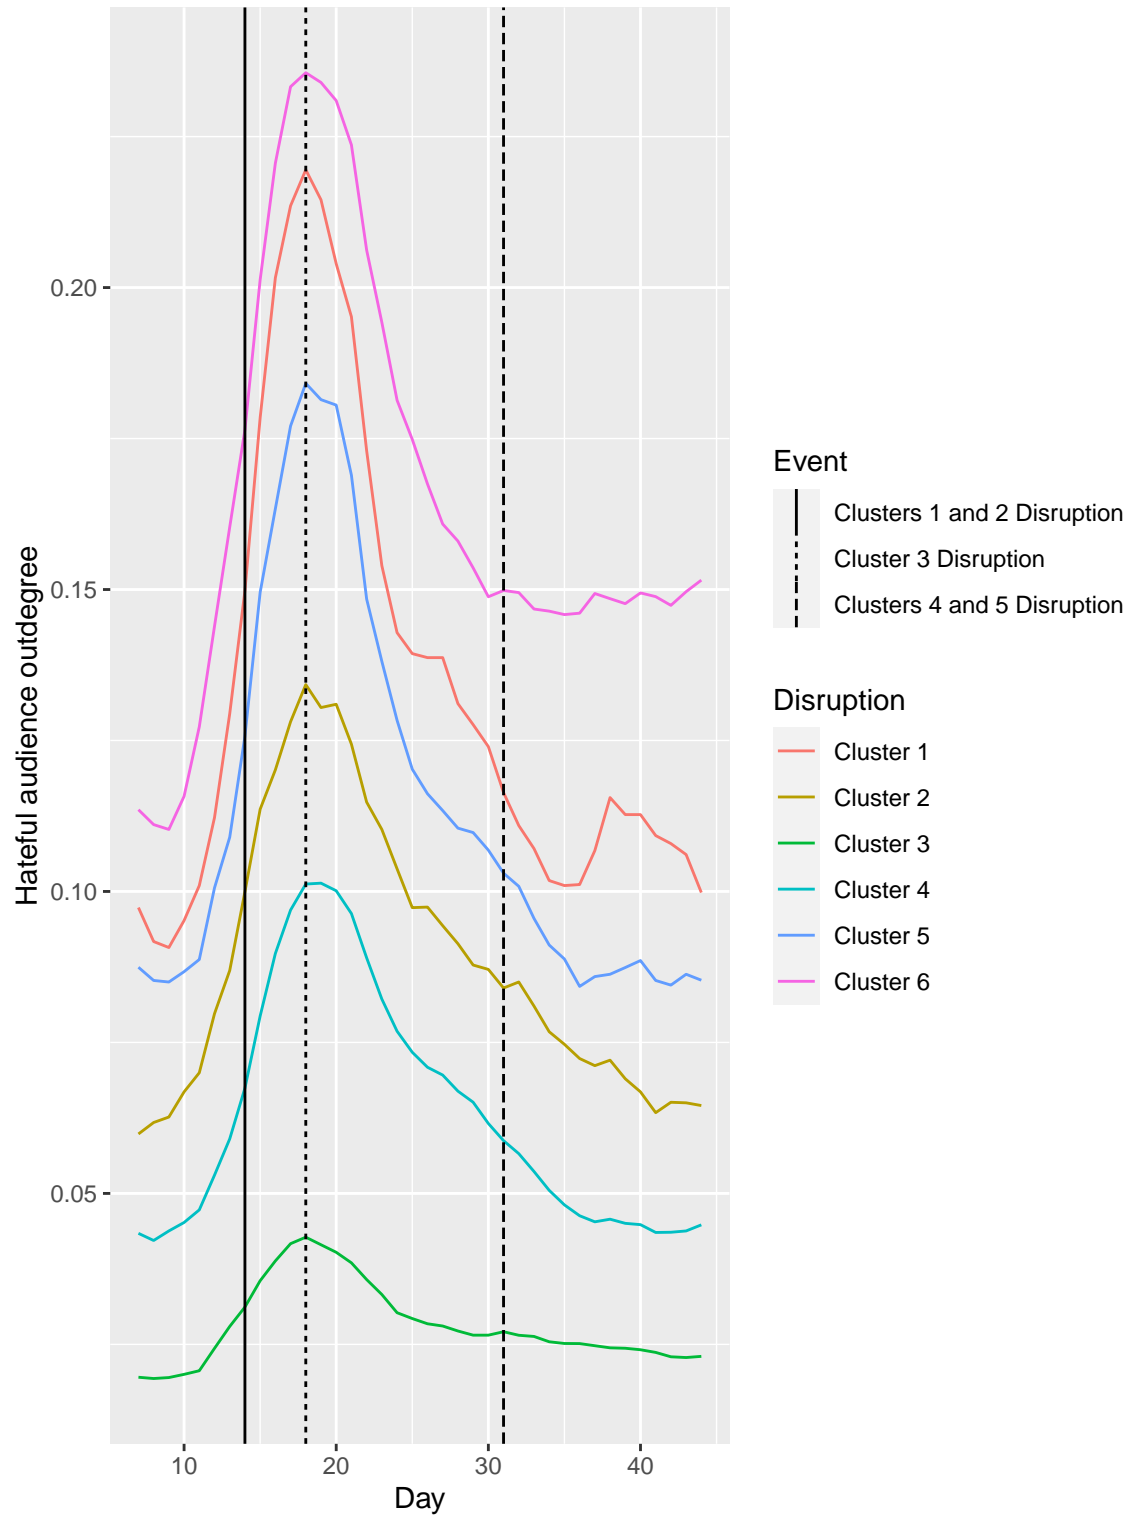

*Hateful non-audience outdegree*

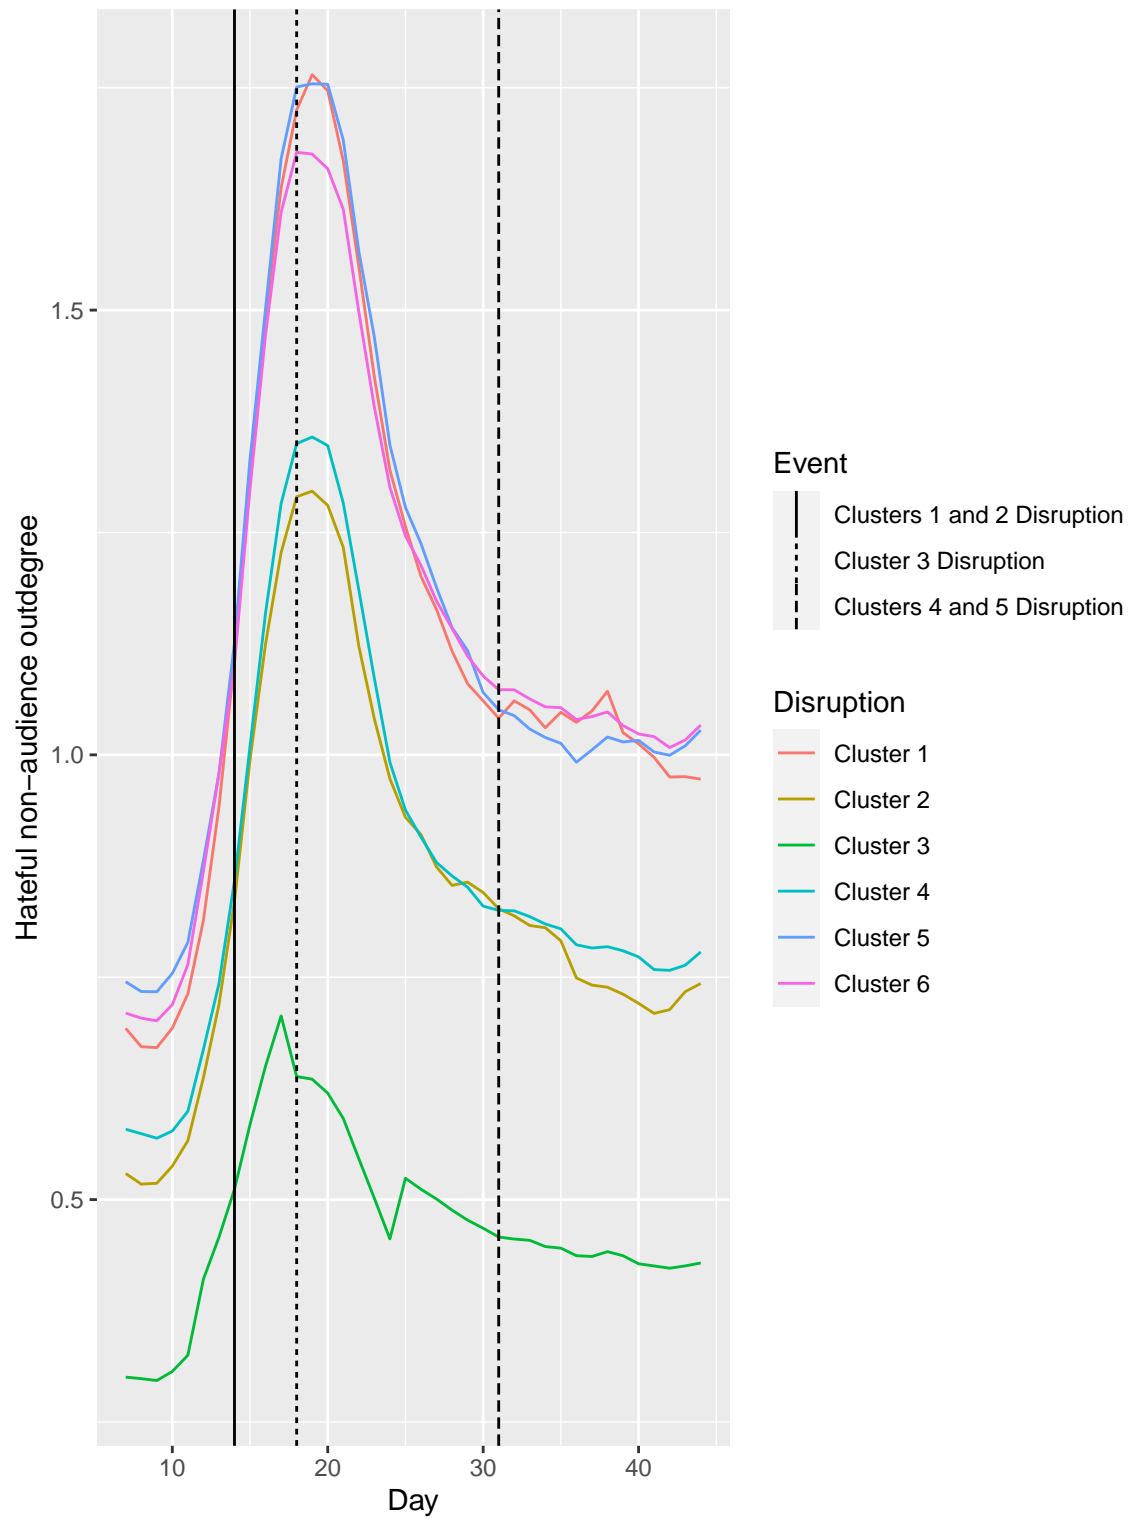



*Audience indegree*

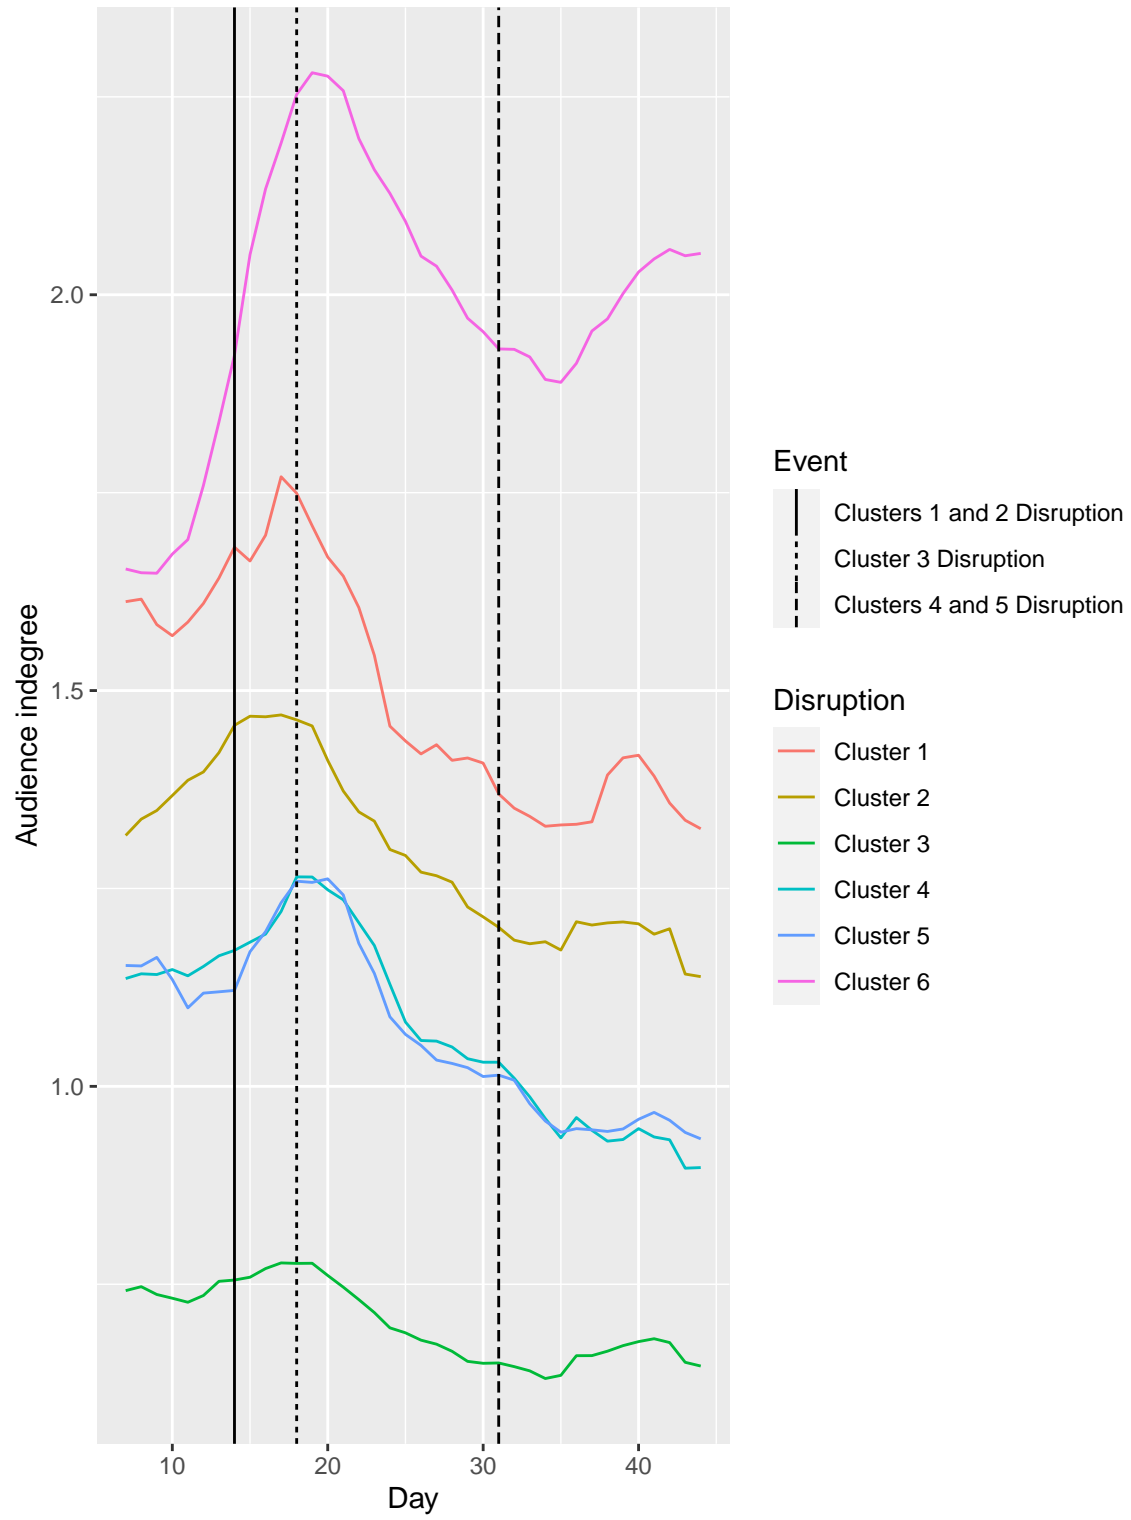

*Audience outdegree*

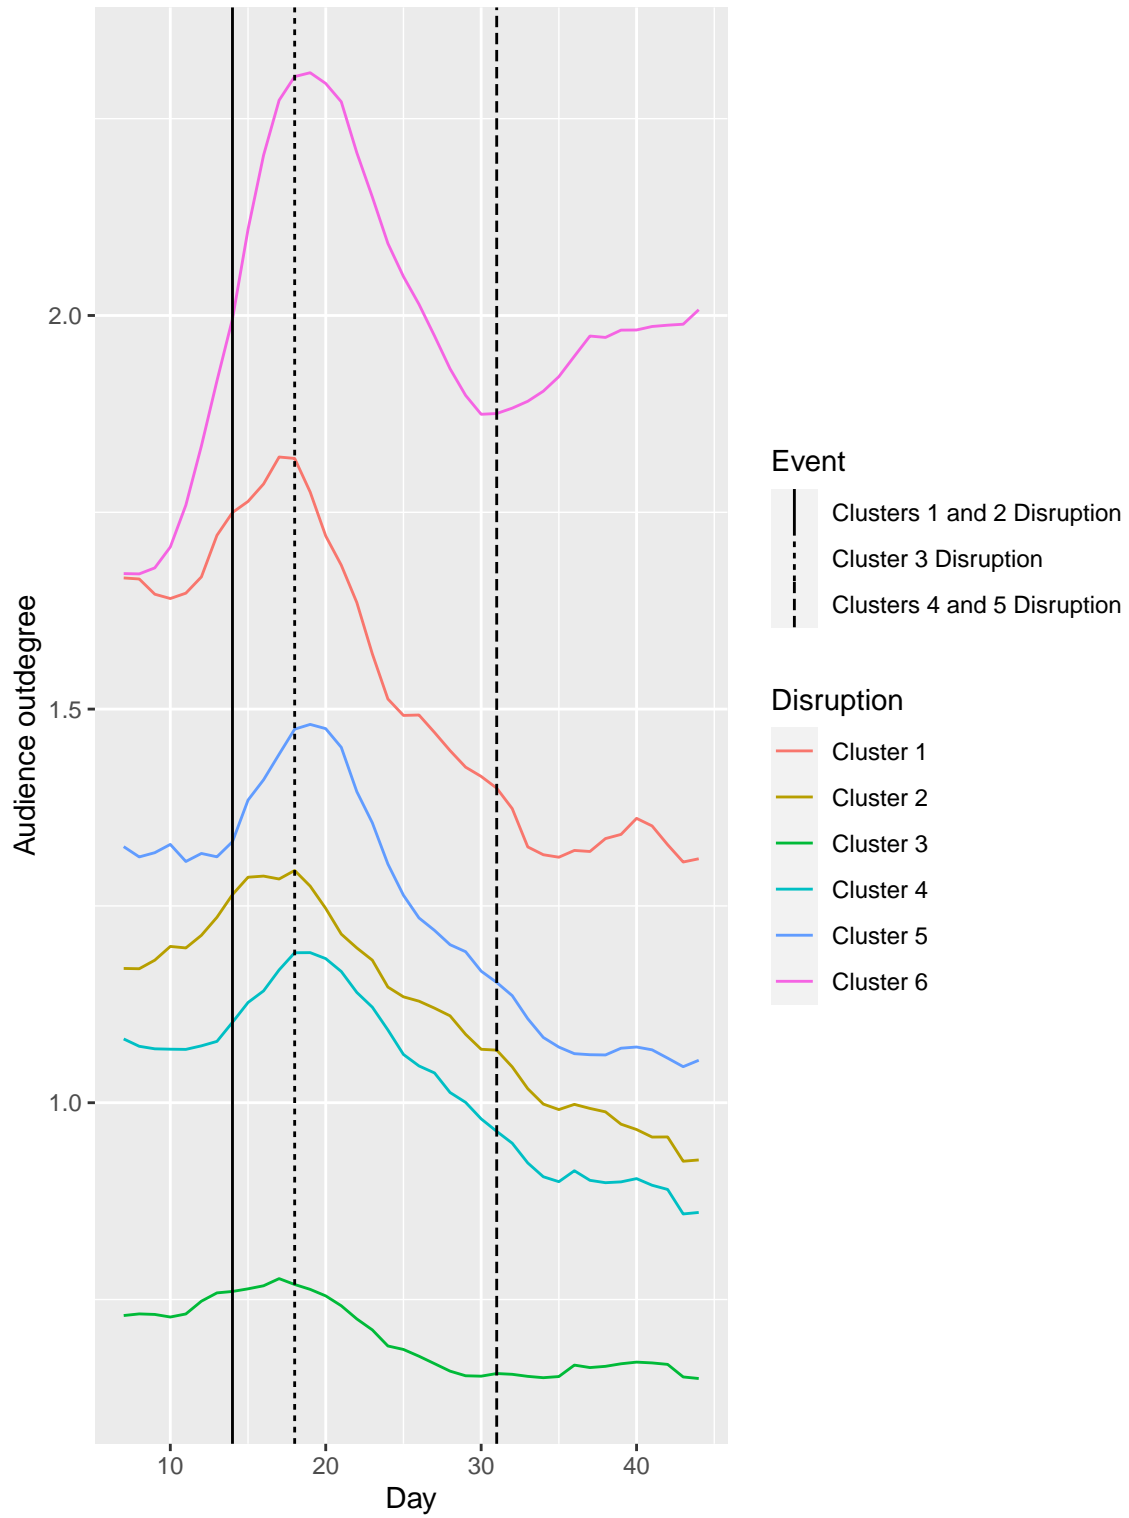

*Audience indegree/total indegree*

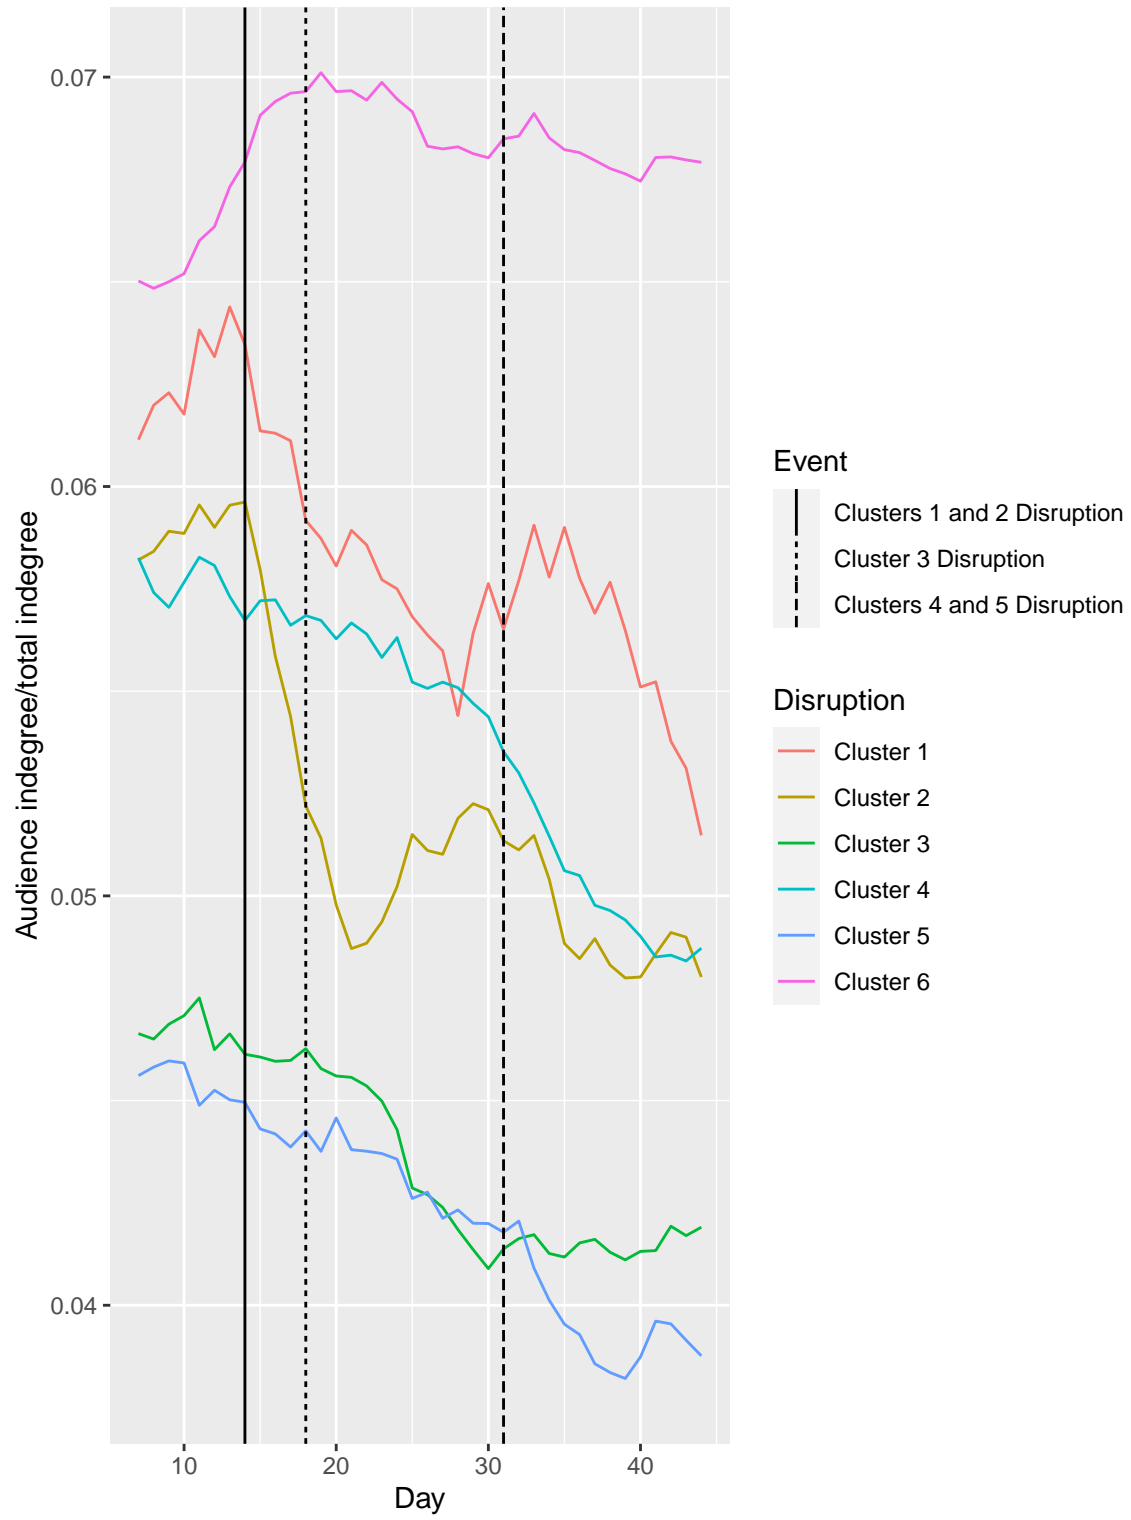

*Audience outdegree/total outdegree*

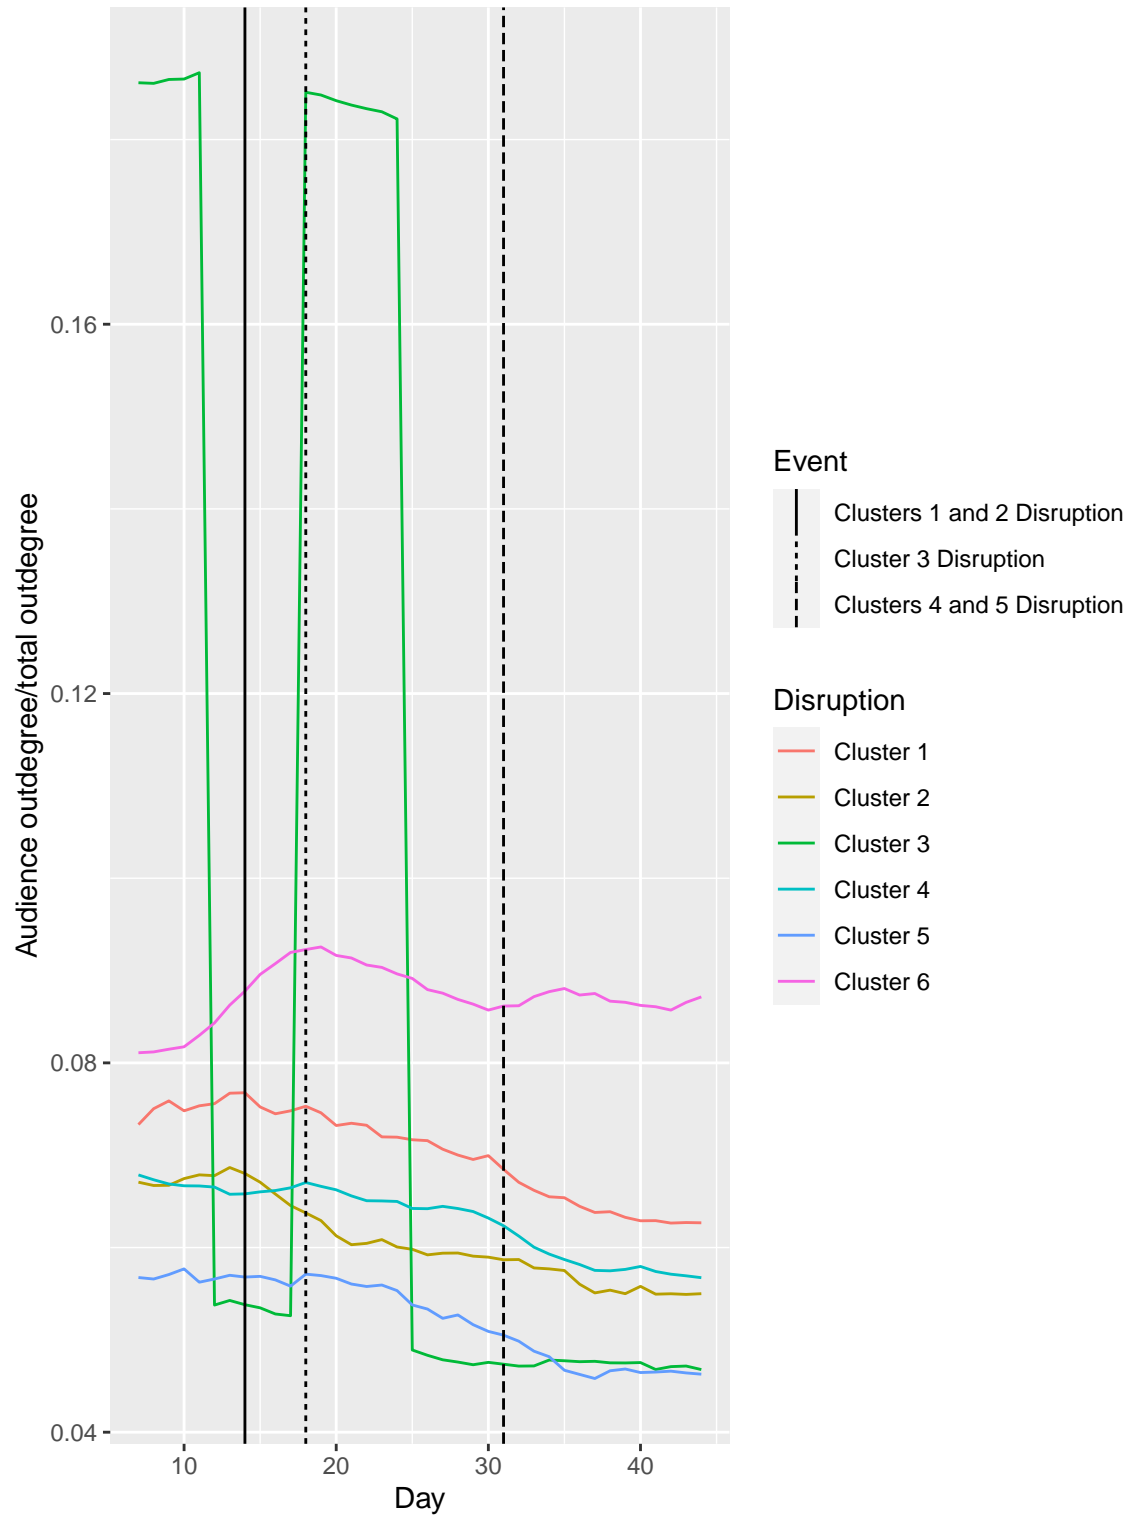

## F test comparisons for Two-Way Fixed Effects and Interactive Fixed Effects

Table A.7: F test for zero average residuals in pre-treatment periods with full sample. The model with the lower F-Stat was chosen.

| Outcome                                           | TWFE F-Stat | TWFE p-value | IFE F-Stat | IFE p-value |
|---------------------------------------------------|-------------|--------------|------------|-------------|
| Views on hateful content                          | 32.299      | 0            | 3.878      | 0           |
| Views on hateful content/total views              | 38.679      | 0            | 25.002     | 0           |
| Hateful comments by audience members              | 9.575       | 0            | 7.698      | 0           |
| Hateful comments/total comments                   | 7.835       | 0            | 7.620      | 0           |
| Views on non-organization content that is hateful | 33.383      | 0            | 3.999      | 0           |
| Audience outdegree                                | 10.521      | 0            | 12.110     | 0           |
| Audience indegree                                 | 3.694       | 0            | 3.244      | 0           |
| Hateful audience outdegree                        | 10.027      | 0            | 8.674      | 0           |
| Hateful non-audience outdegree                    | 17.025      | 0            | 6.561      | 0           |
| Audience indegree/total indegree                  | 3.404       | 0            | 3.468      | 0           |
| Audience outdegree/total outdegree                | 105.305     | 0            | 138.852    | 0           |

**Equivalence plots for main outcomes with short time frame and no sampled control groups**

### Equivalence Test

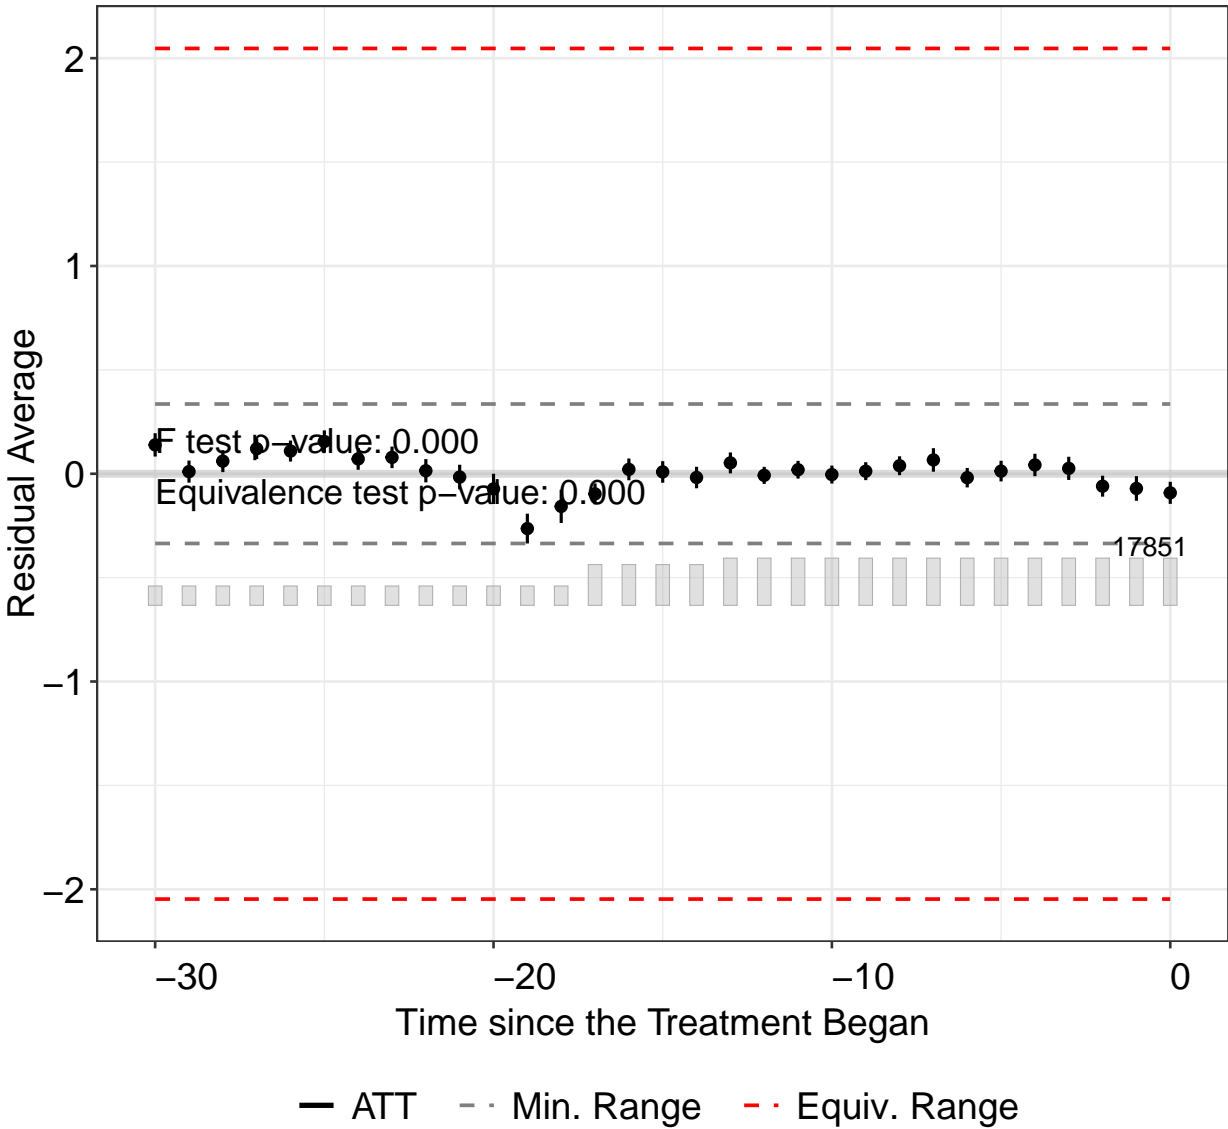



### Equivalence Test

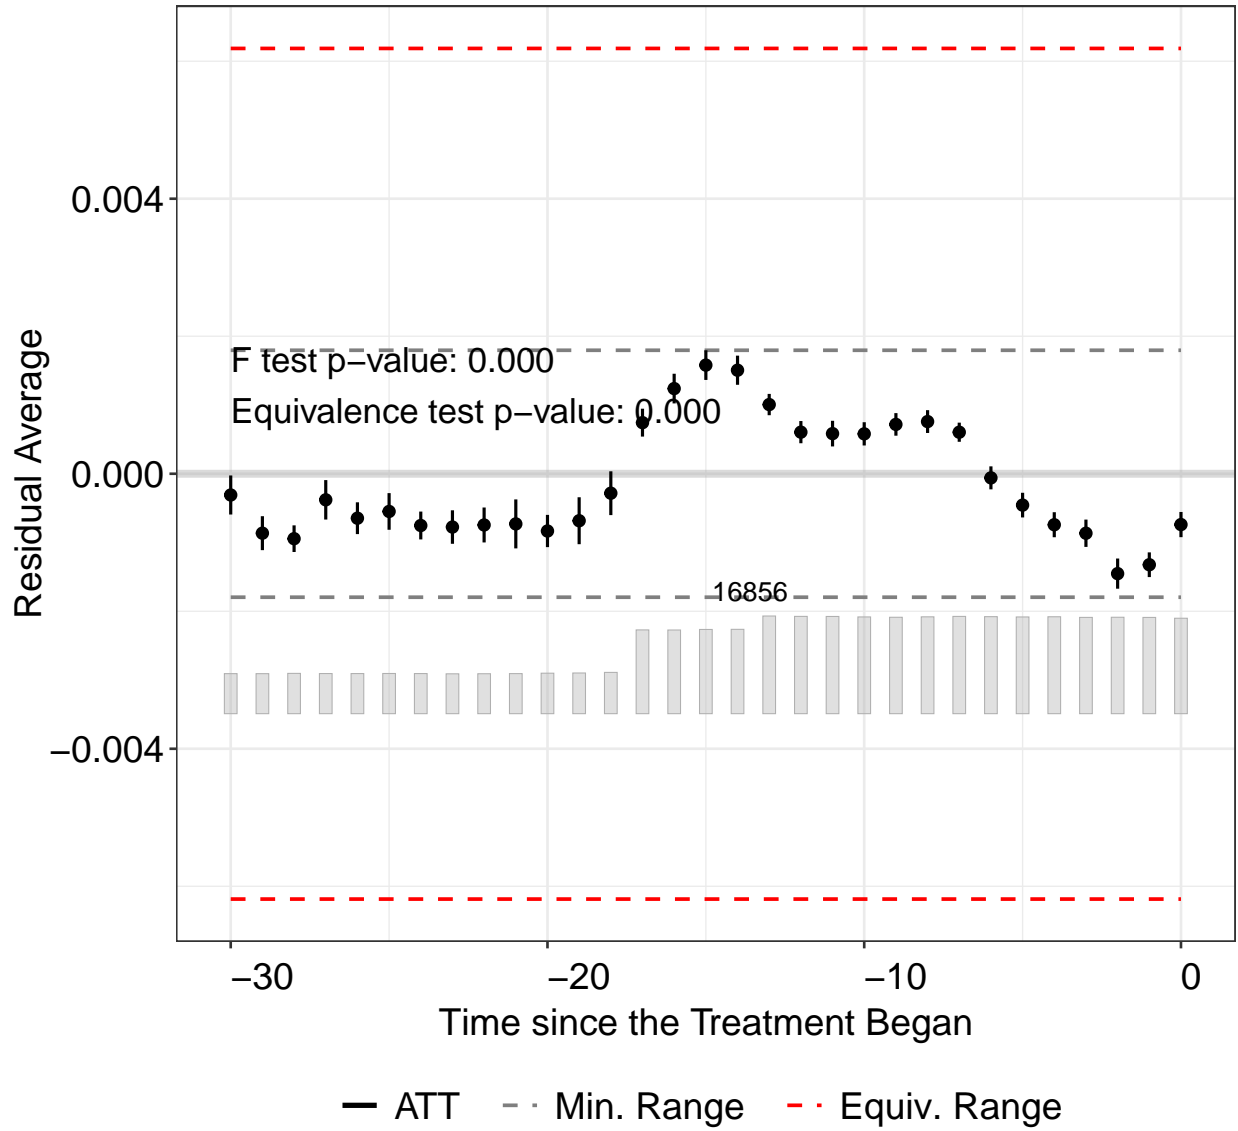

### Equivalence Test

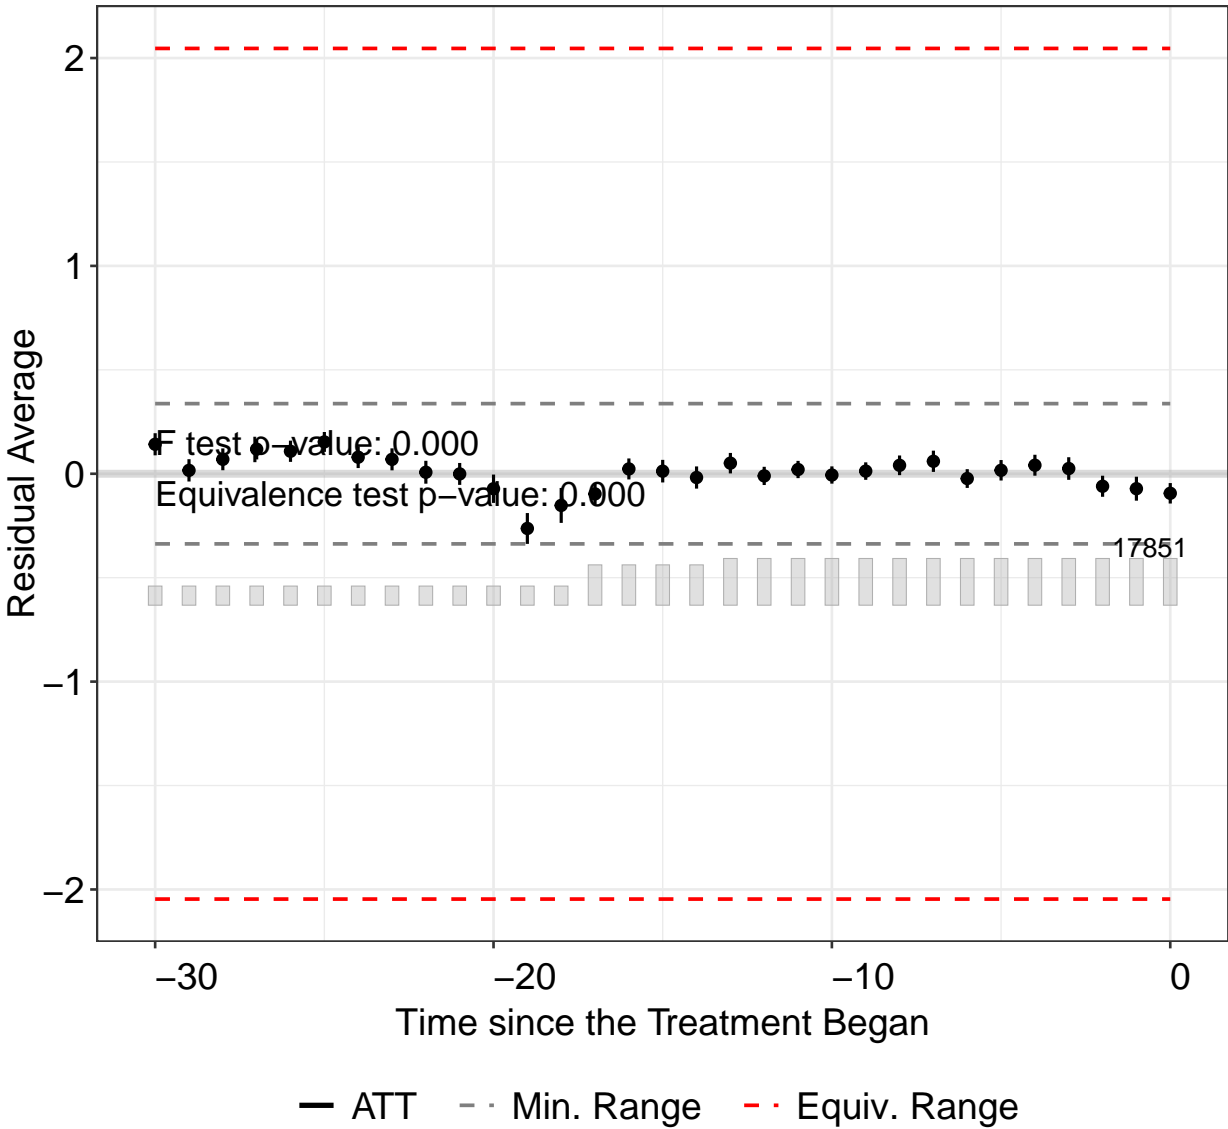

### Equivalence Test

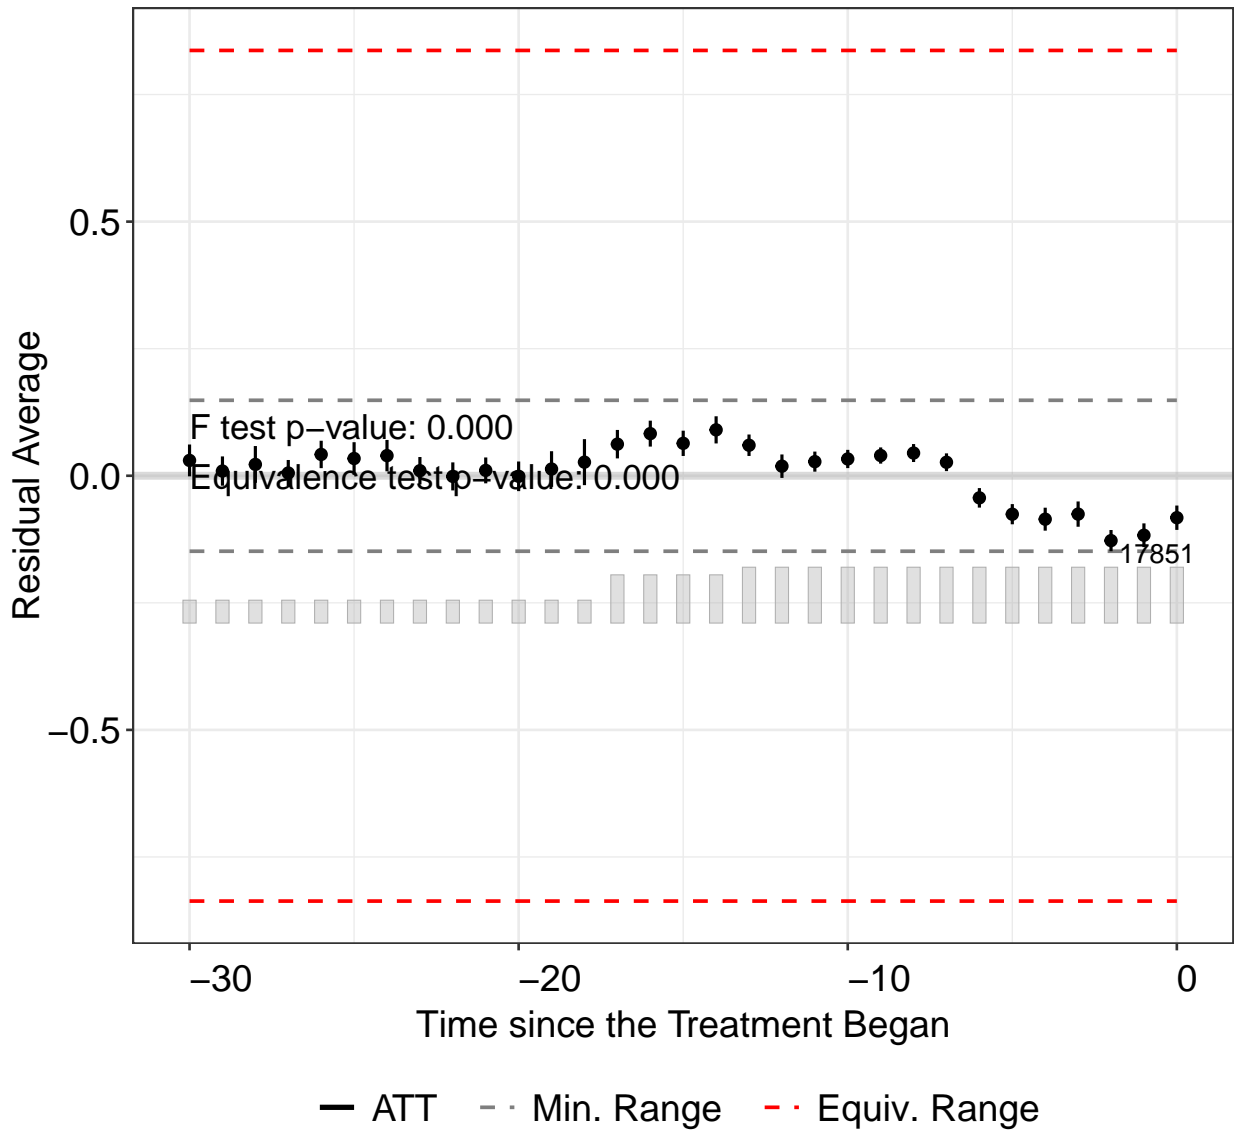

### Equivalence Test

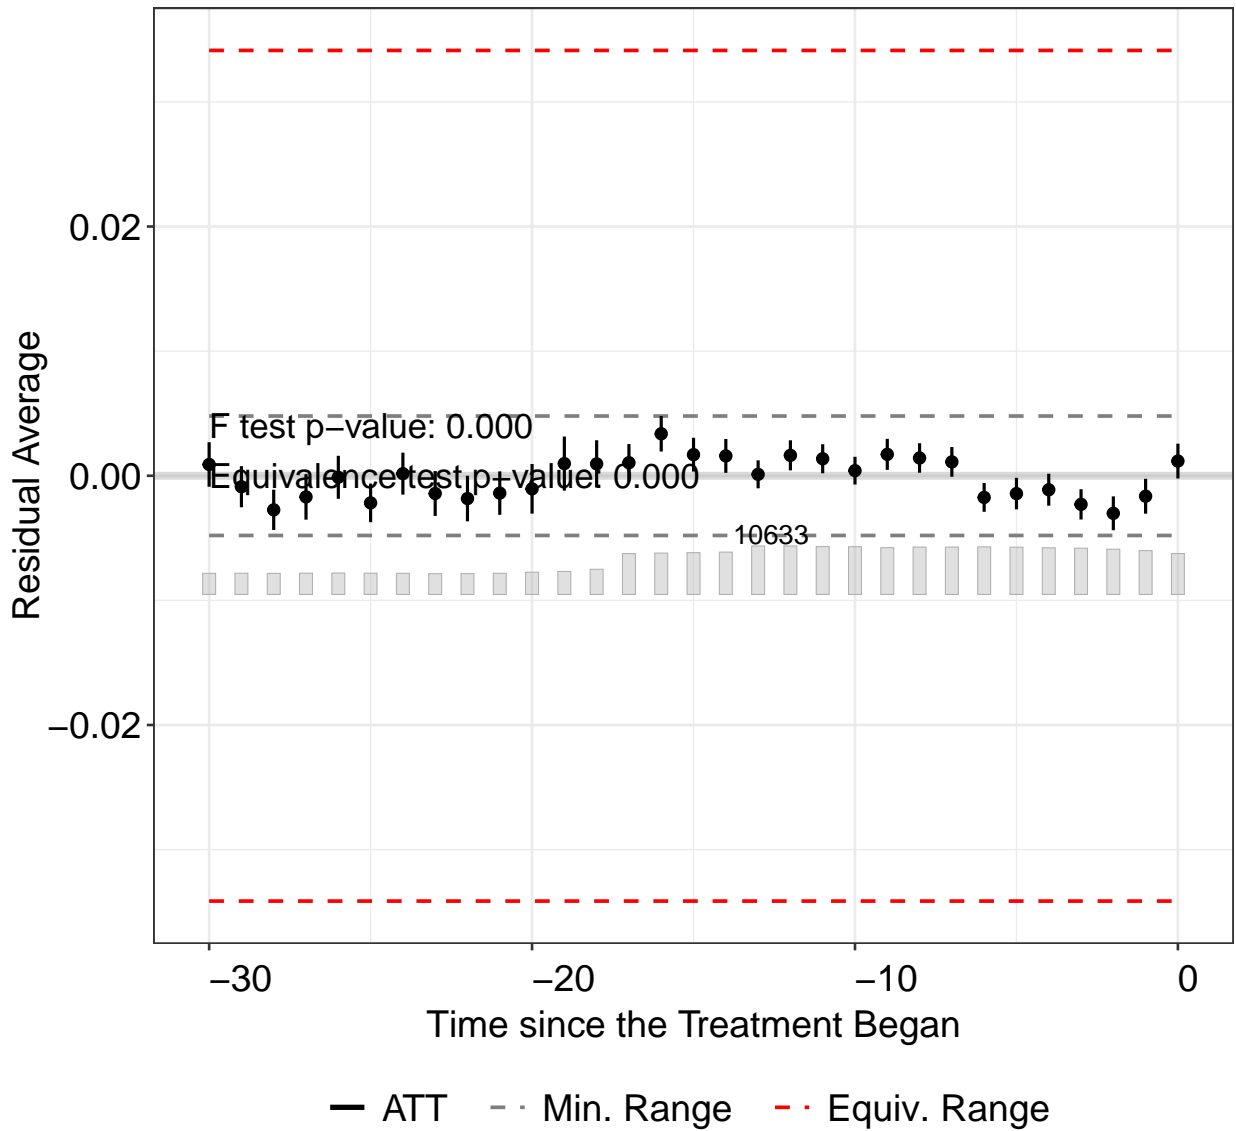

### Equivalence Test

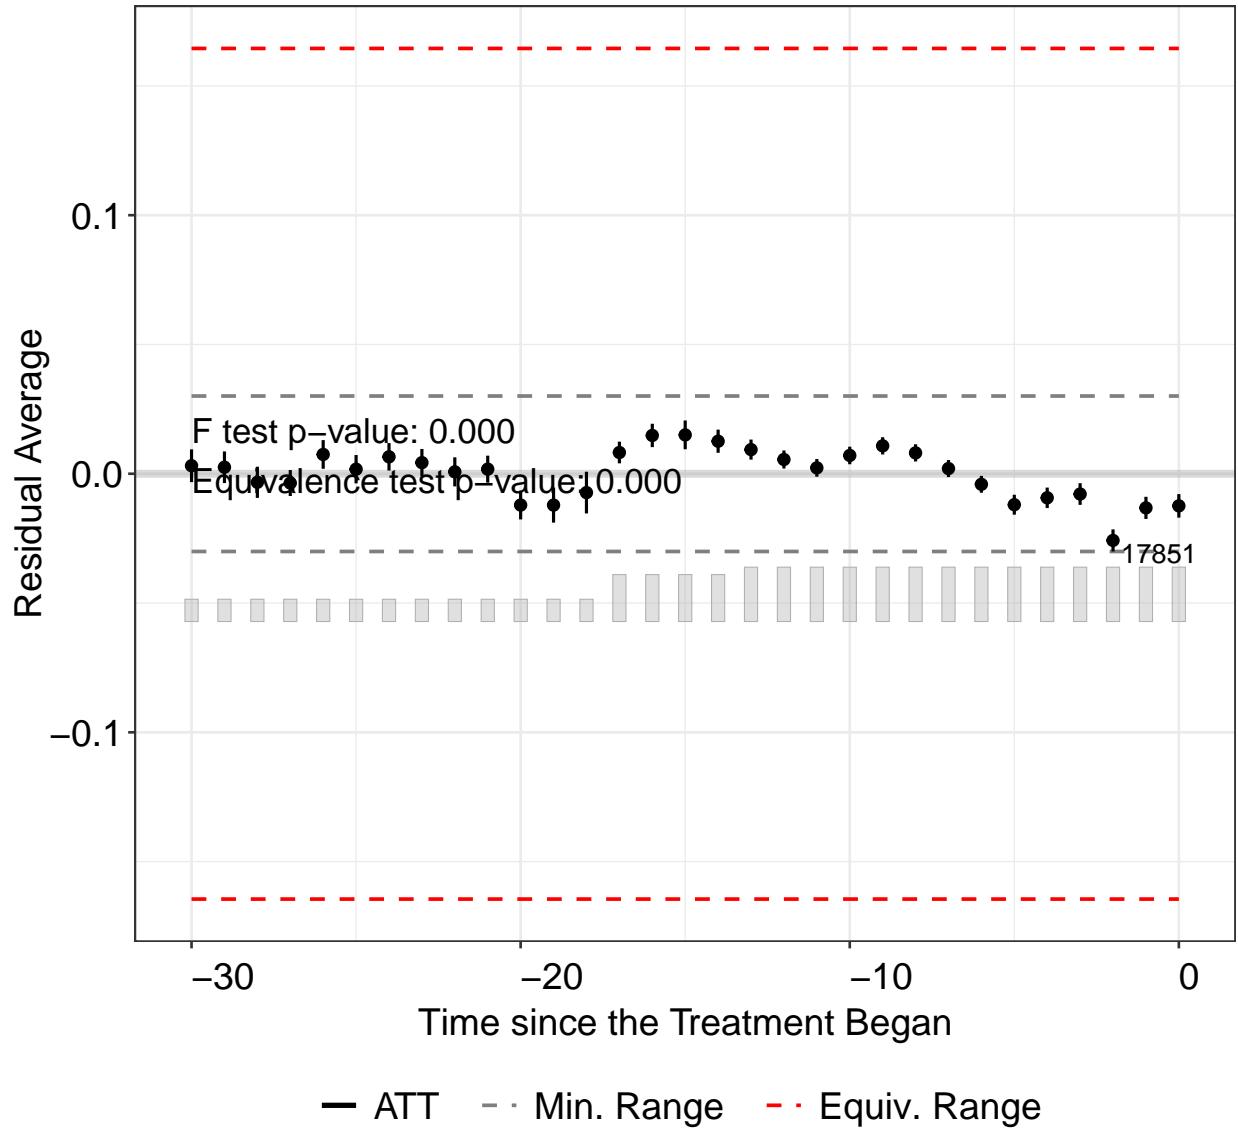

### Equivalence Test

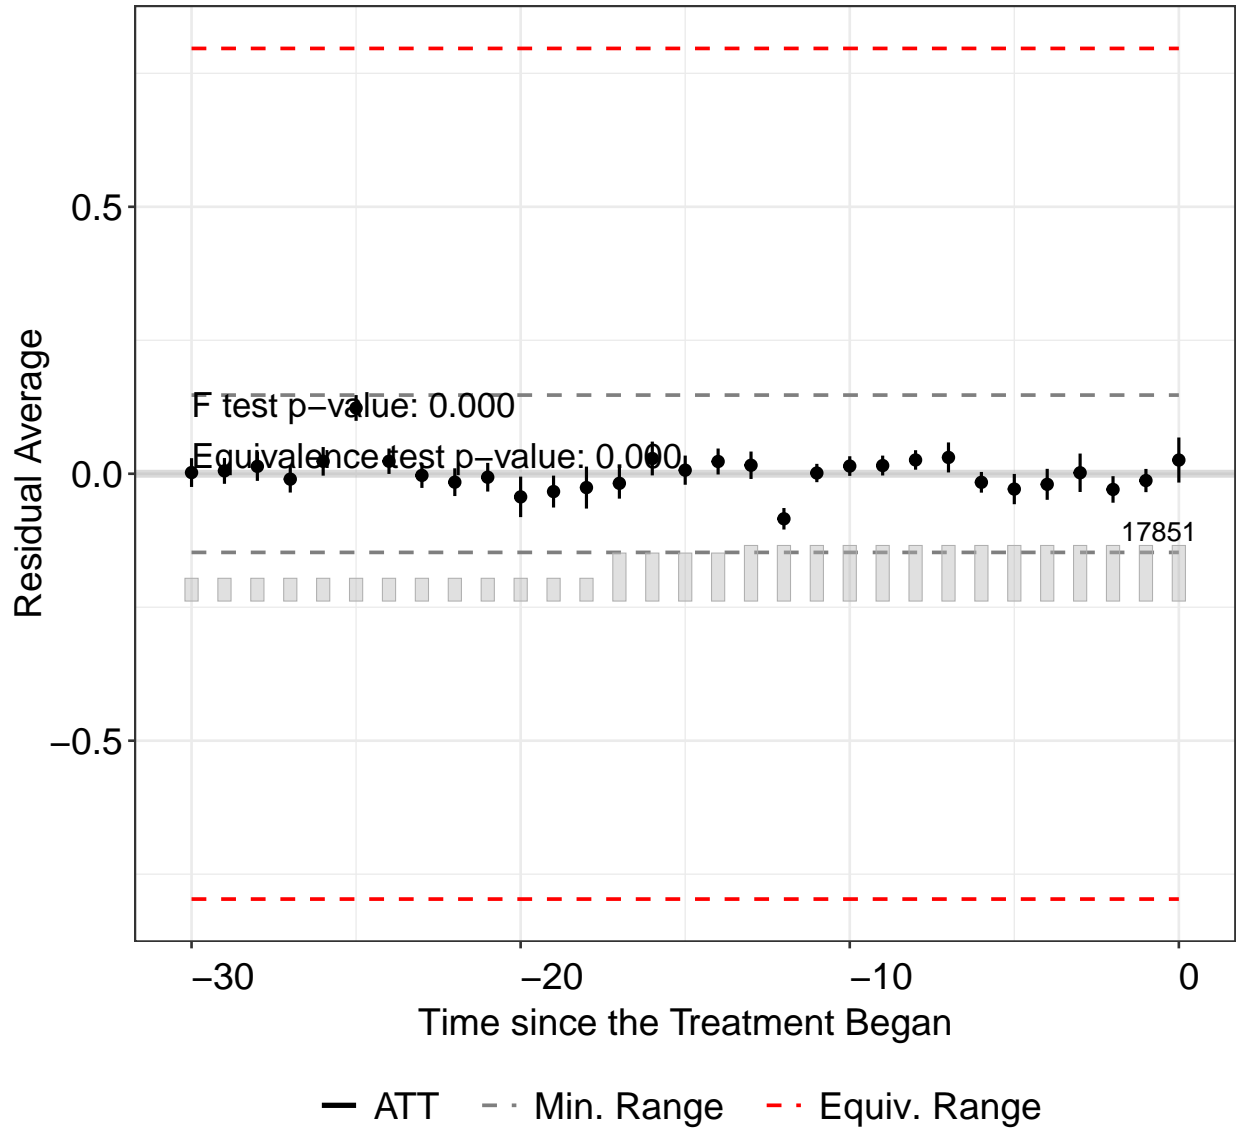

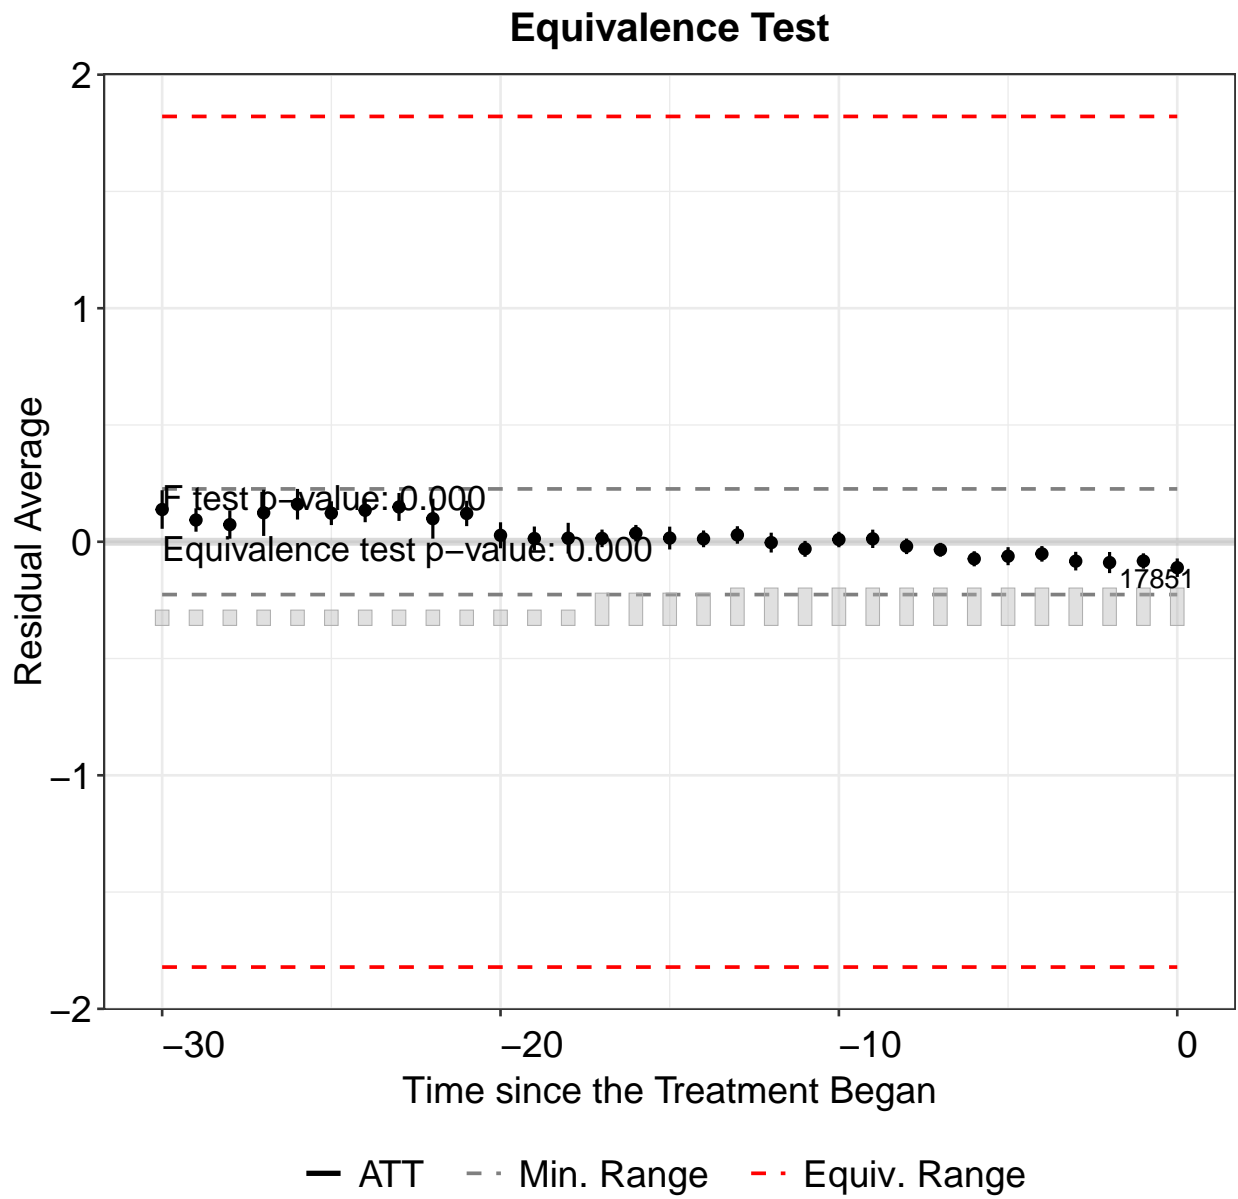

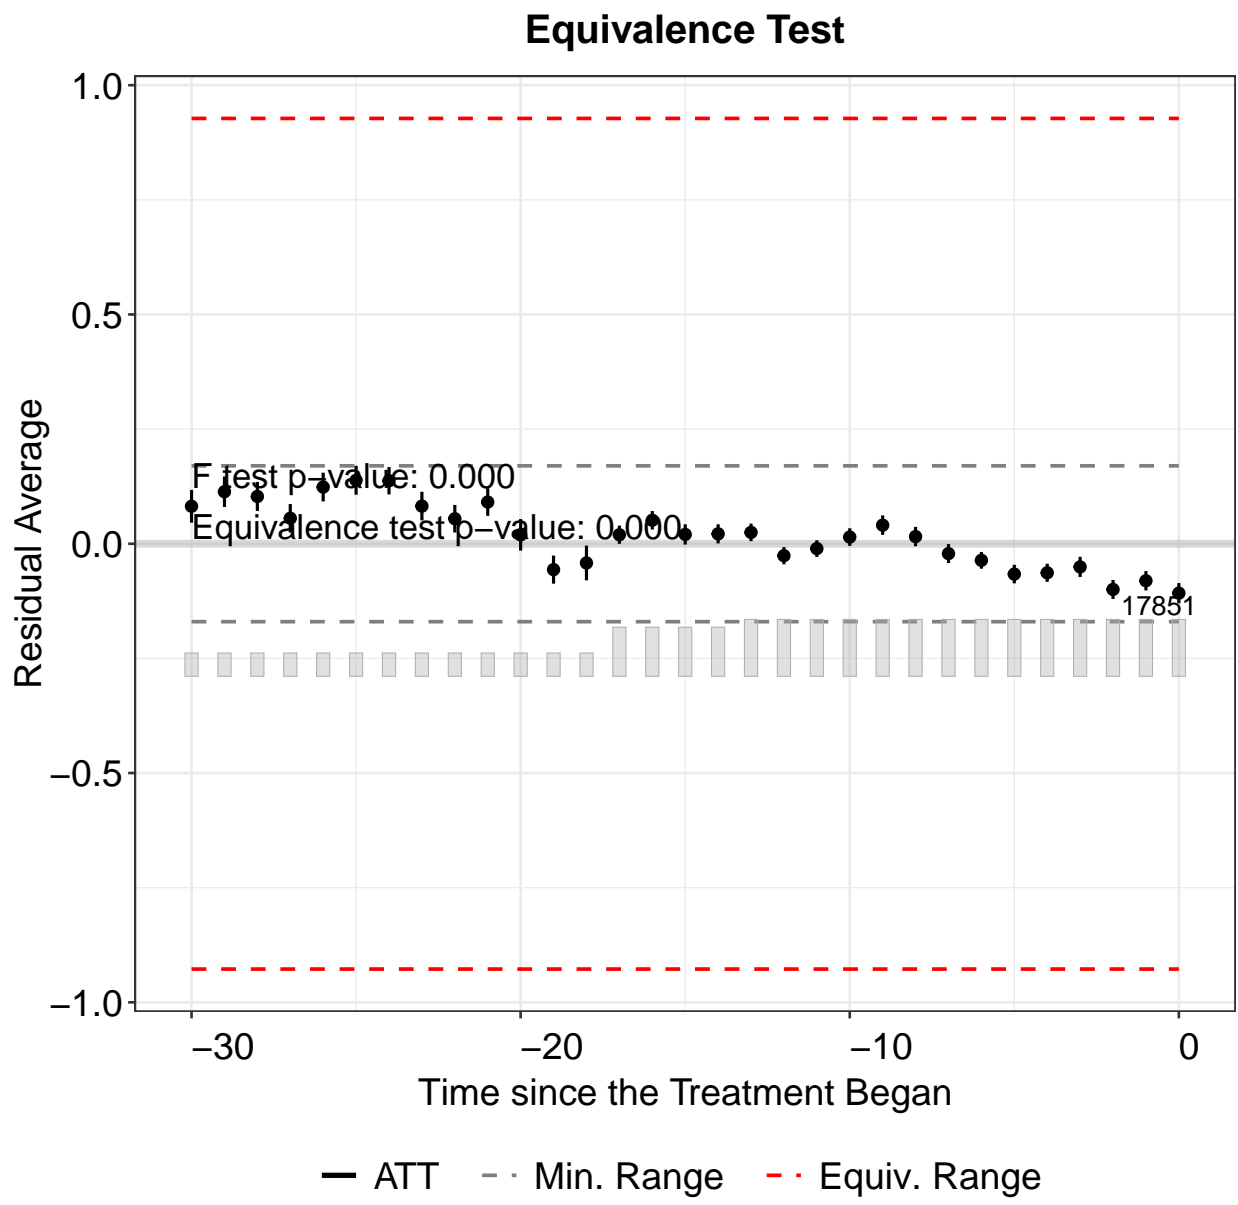



### Equivalence Test

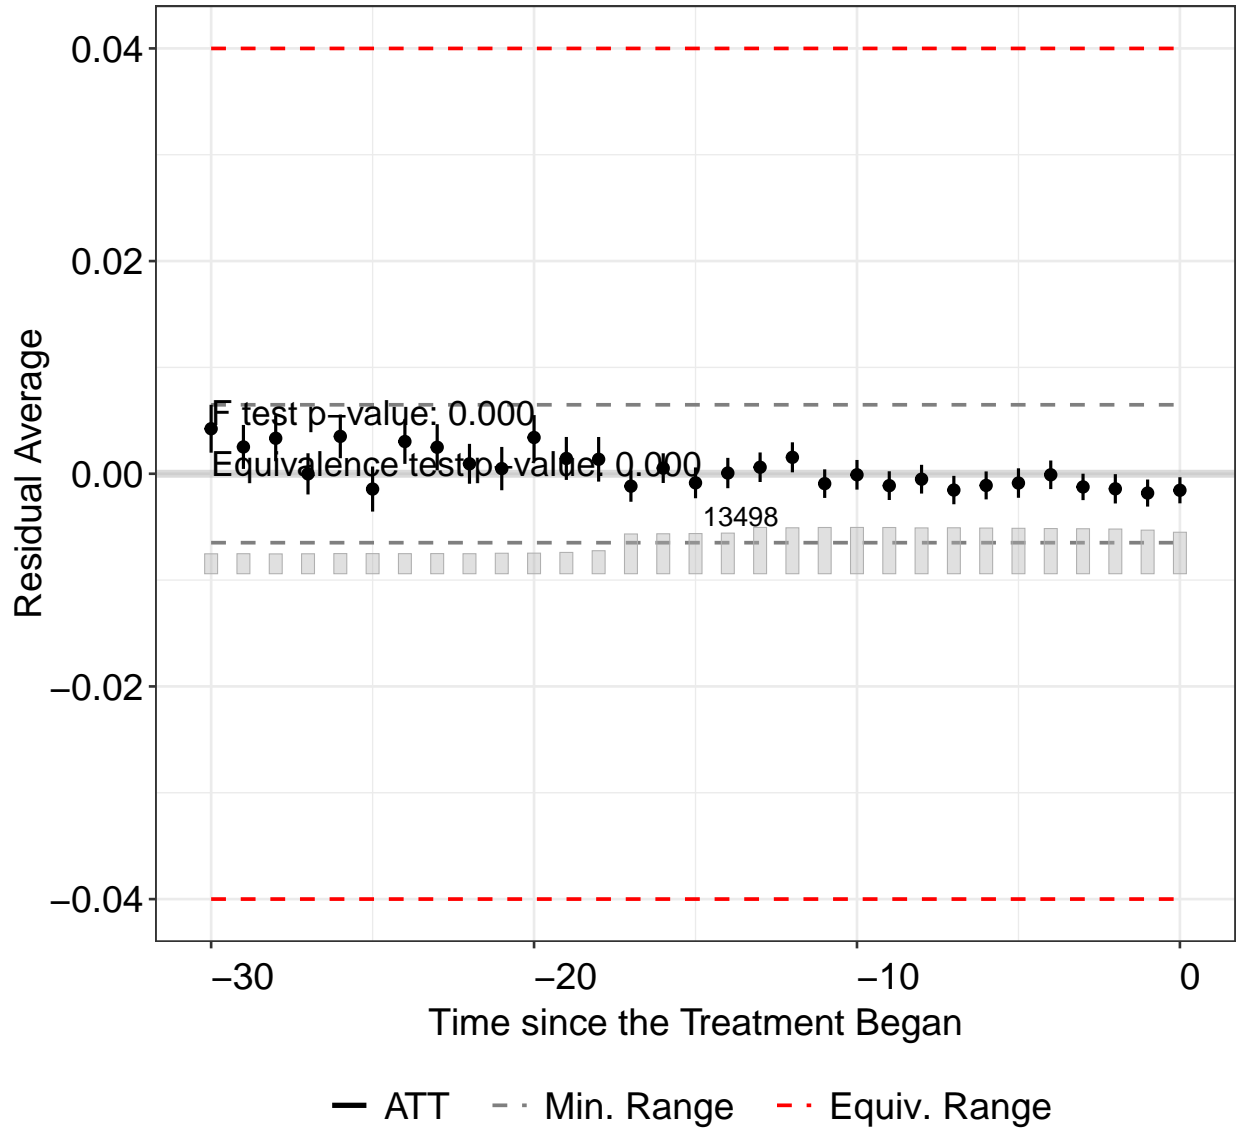

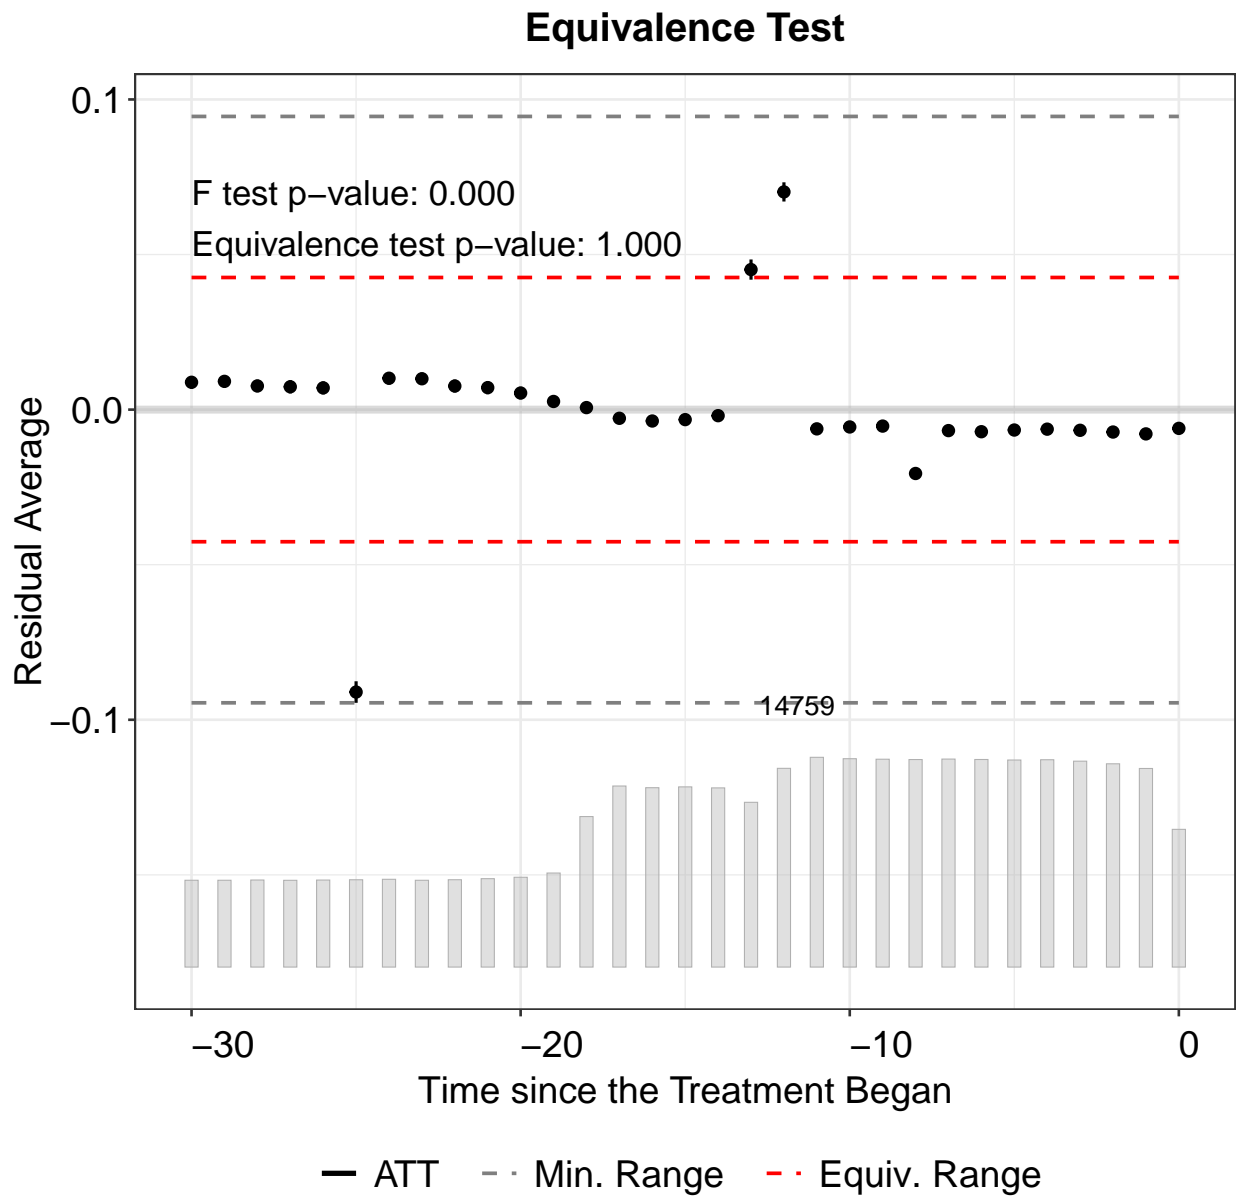

**Placebo test results for main outcomes with short time frame and no sampled control groups**

| Outcome                                           | Placebo p-value      | Placebo equivalence p-value |
|---------------------------------------------------|----------------------|-----------------------------|
| Views on hateful content                          | 6.23036000990673e-06 | 0                           |
| Views on hateful content/total views              | 0                    | 0                           |
| Views on non-organization content that is hateful | 1.06404552726591e-05 | 0                           |
| Hateful comments by audience members              | 0                    | 0                           |
| Hateful comments/total comments                   | 0.0248776176039796   | 0                           |
| Hateful audience outdegree                        | 0                    | 0                           |
| Hateful non-audience outdegree                    | 0.569233829028701    | 0                           |
| Audience indegree                                 | 1.0962936114467e-07  | 0                           |
| Audience outdegree                                | 0                    | 0                           |
| Audience indegree/total indegree                  | 0.000198934155375197 | 0                           |
| Audience outdegree/total outdegree                | 0                    | 0                           |

**Tabular results for average ATT for short time frame with no sampled control groups**

**Table A.8: Effect of disruptions on Views on hateful content**

| Sample                       | ATT.avg    | S.E.      | CI.lower   | CI.upper   | p.value  |
|------------------------------|------------|-----------|------------|------------|----------|
| Full Data                    | -0.4026167 | 0.0446714 | -0.4901710 | -0.3150623 | 0.000000 |
| Most views on organization   | 0.3608362  | 0.1027127 | 0.1595230  | 0.5621494  | 0.000443 |
| Middle views on organization | -0.4445142 | 0.0675101 | -0.5768315 | -0.3121968 | 0.000000 |
| Least views on organization  | -0.7884671 | 0.0771311 | -0.9396414 | -0.6372929 | 0.000000 |

**Table A.9: Effect of disruptions on Views on hateful content/total views**

| Sample                       | ATT.avg    | S.E.      | CI.lower   | CI.upper   | p.value   |
|------------------------------|------------|-----------|------------|------------|-----------|
| Full Data                    | 0.0000007  | 0.0000841 | -0.0001642 | 0.0001656  | 0.9931567 |
| Most views on organization   | 0.0008897  | 0.0001470 | 0.0006015  | 0.0011778  | 0.0000000 |
| Middle views on organization | 0.0000993  | 0.0001174 | -0.0001308 | 0.0003293  | 0.3977487 |
| Least views on organization  | -0.0007264 | 0.0001525 | -0.0010253 | -0.0004275 | 0.0000019 |

**Table A.10: Effect of disruptions on Hateful comments by audience members**

| Sample                       | ATT.avg    | S.E.      | CI.lower   | CI.upper   | p.value   |
|------------------------------|------------|-----------|------------|------------|-----------|
| Full Data                    | -0.0252038 | 0.0144227 | -0.0534718 | 0.0030642  | 0.0805495 |
| Most views on organization   | 0.1011454  | 0.0272152 | 0.0478045  | 0.1544862  | 0.0002020 |
| Middle views on organization | -0.0180461 | 0.0187338 | -0.0547636 | 0.0186714  | 0.3354004 |
| Least views on organization  | -0.1140474 | 0.0281606 | -0.1692411 | -0.0588537 | 0.0000512 |

**Table A.11: Effect of disruptions on Hateful comments/total comments**

| Sample                       | ATT.avg    | S.E.      | CI.lower   | CI.upper  | p.value   |
|------------------------------|------------|-----------|------------|-----------|-----------|
| Full Data                    | 0.0002060  | 0.0004598 | -0.0006951 | 0.0011072 | 0.6540582 |
| Most views on organization   | 0.0017742  | 0.0009969 | -0.0001797 | 0.0037282 | 0.0751301 |
| Middle views on organization | 0.0003132  | 0.0007596 | -0.0011755 | 0.0018020 | 0.6800649 |
| Least views on organization  | -0.0010006 | 0.0007507 | -0.0024719 | 0.0004707 | 0.1825389 |

Table A.12: Effect of disruptions on Views on non-organization content that is hateful

| Sample                       | ATT.avg    | S.E.      | CI.lower   | CI.upper   | p.value   |
|------------------------------|------------|-----------|------------|------------|-----------|
| Full Data                    | -0.4081367 | 0.0435787 | -0.4935495 | -0.3227239 | 0.0000000 |
| Most views on organization   | 0.3439099  | 0.1099919 | 0.1283298  | 0.5594899  | 0.0017679 |
| Middle views on organization | -0.4489917 | 0.0658521 | -0.5780594 | -0.3199239 | 0.0000000 |
| Least views on organization  | -0.7883808 | 0.0795583 | -0.9443121 | -0.6324494 | 0.0000000 |

Table A.13: Effect of disruptions on Audience outdegree

| Sample                       | ATT.avg    | S.E.      | CI.lower   | CI.upper   | p.value   |
|------------------------------|------------|-----------|------------|------------|-----------|
| Full Data                    | -0.1800894 | 0.0229127 | -0.2249974 | -0.1351813 | 0.0000000 |
| Most views on organization   | 0.1644274  | 0.0602424 | 0.0463544  | 0.2825004  | 0.0063444 |
| Middle views on organization | -0.1885656 | 0.0316152 | -0.2505302 | -0.1266010 | 0.0000000 |
| Least views on organization  | -0.4000417 | 0.0305189 | -0.4598576 | -0.3402258 | 0.0000000 |

Table A.14: Effect of disruptions on Audience indegree

| Sample                       | ATT.avg    | S.E.      | CI.lower   | CI.upper   | p.value   |
|------------------------------|------------|-----------|------------|------------|-----------|
| Full Data                    | -0.2071472 | 0.0378997 | -0.2814293 | -0.1328652 | 0.0000000 |
| Most views on organization   | 0.2050177  | 0.1007227 | 0.0076048  | 0.4024307  | 0.0418040 |
| Middle views on organization | -0.2193103 | 0.0580175 | -0.3330226 | -0.1055980 | 0.0001568 |
| Least views on organization  | -0.4672208 | 0.0454231 | -0.5562485 | -0.3781931 | 0.0000000 |

Table A.15: Effect of disruptions on Hateful audience outdegree

| Sample                       | ATT.avg    | S.E.      | CI.lower   | CI.upper   | p.value   |
|------------------------------|------------|-----------|------------|------------|-----------|
| Full Data                    | -0.0024659 | 0.0030129 | -0.0083710 | 0.0034392  | 0.4130968 |
| Most views on organization   | 0.0066441  | 0.0145640 | -0.0219009 | 0.0351891  | 0.6482477 |
| Middle views on organization | -0.0053615 | 0.0037678 | -0.0127464 | 0.0020233  | 0.1547438 |
| Least views on organization  | -0.0299857 | 0.0036969 | -0.0372315 | -0.0227398 | 0.0000000 |

Table A.16: Effect of disruptions on Hateful non-audience outdegree

| Sample                       | ATT.avg    | S.E.      | CI.lower   | CI.upper   | p.value   |
|------------------------------|------------|-----------|------------|------------|-----------|
| Full Data                    | 0.0002815  | 0.0816046 | -0.1596606 | 0.1602236  | 0.9972478 |
| Most views on organization   | 0.0436071  | 0.0270035 | -0.0093189 | 0.0965330  | 0.1063399 |
| Middle views on organization | -0.0207245 | 0.0339628 | -0.0872903 | 0.0458413  | 0.5417206 |
| Least views on organization  | -0.1736932 | 0.0318226 | -0.2360643 | -0.1113221 | 0.0000000 |

Table A.17: Effect of disruptions on Audience indegree/total indegree

| Sample                       | ATT.avg    | S.E.      | CI.lower   | CI.upper   | p.value   |
|------------------------------|------------|-----------|------------|------------|-----------|
| Full Data                    | -0.0063571 | 0.0005771 | -0.0074882 | -0.0052260 | 0.0000000 |
| Most views on organization   | -0.0040284 | 0.0014453 | -0.0068612 | -0.0011957 | 0.0053153 |
| Middle views on organization | -0.0055099 | 0.0008766 | -0.0072280 | -0.0037917 | 0.0000000 |
| Least views on organization  | -0.0090988 | 0.0007989 | -0.0106646 | -0.0075330 | 0.0000000 |

Table A.18: Effect of disruptions on Audience outdegree/total outdegree

| Sample                       | ATT.avg    | S.E.      | CI.lower   | CI.upper   | p.value |
|------------------------------|------------|-----------|------------|------------|---------|
| Full Data                    | -0.0122419 | 0.0006026 | -0.0134229 | -0.0110609 | 0       |
| Most views on organization   | -0.0077856 | 0.0013453 | -0.0104223 | -0.0051488 | 0       |
| Middle views on organization | -0.0116771 | 0.0008718 | -0.0133857 | -0.0099685 | 0       |
| Least views on organization  | -0.0162708 | 0.0008683 | -0.0179727 | -0.0145690 | 0       |

# Effects over time plots for all manuscript outcomes

## Consumption

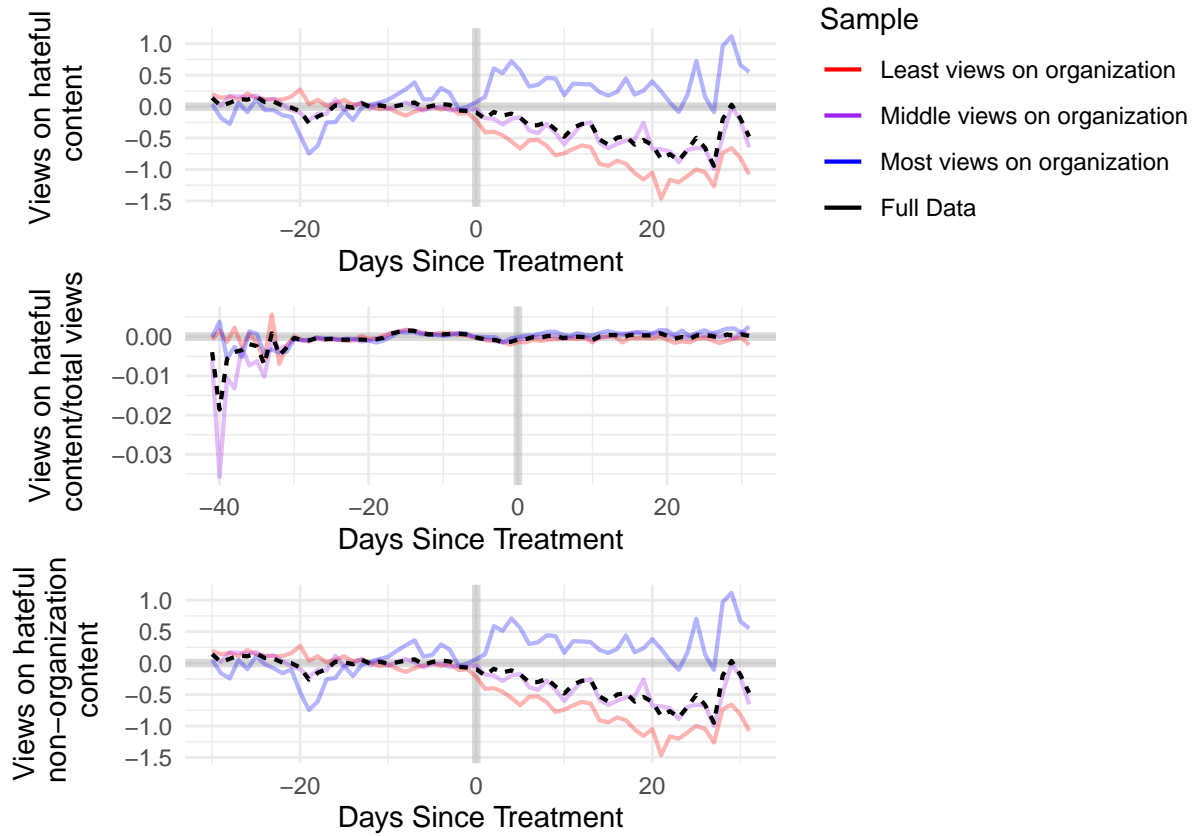

*Production*

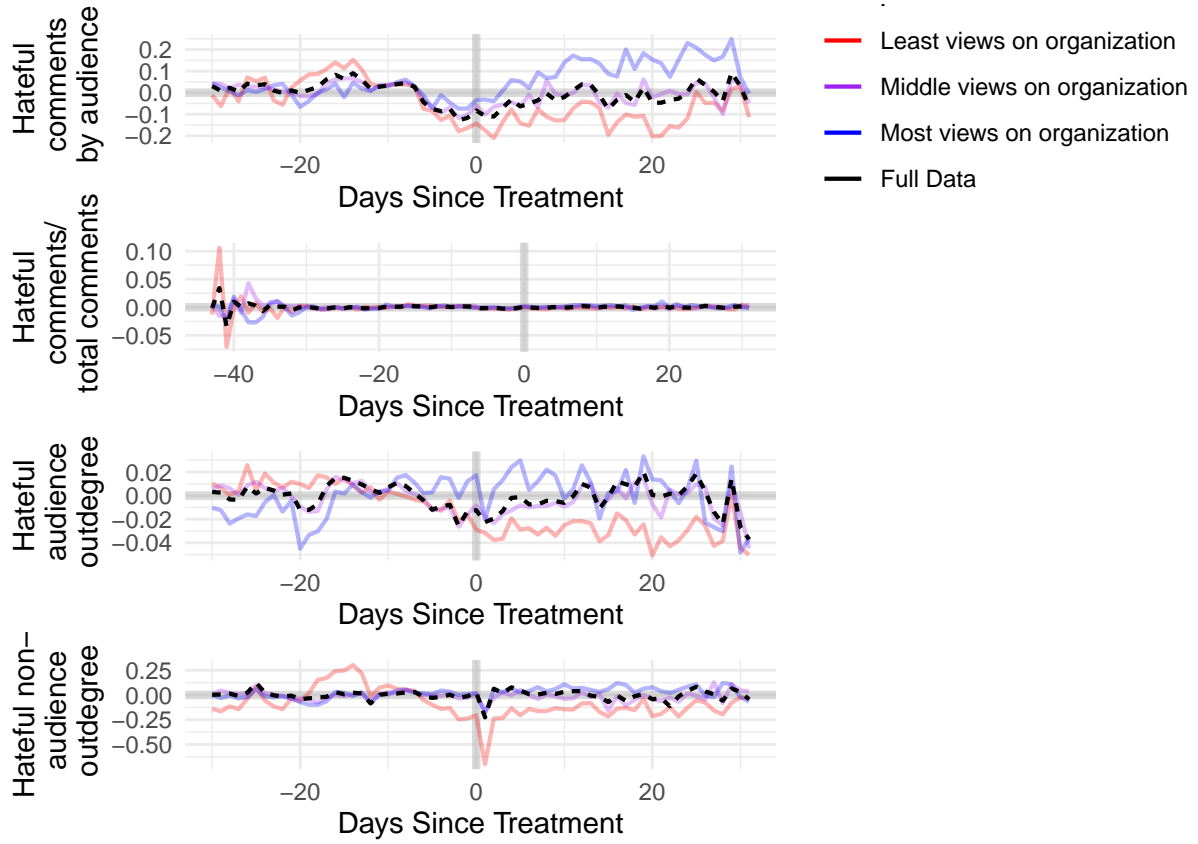



Network behavior

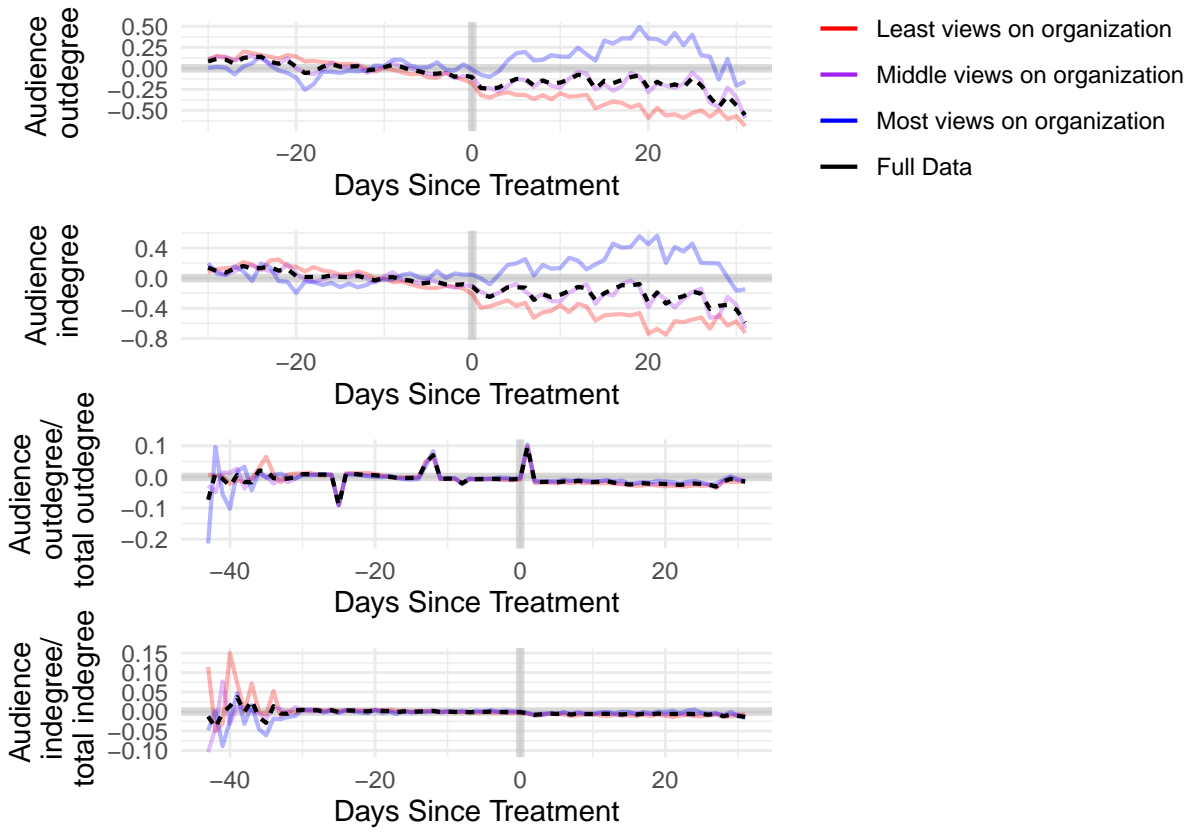

## Effect of disruptions on consumption and production of ideologically aligned content

Table A.19: Effect of disruptions on Ideologically aligned terms views

| Sample                       | ATT.avg    | S.E.      | CI.lower   | CI.upper   | p.value   |
|------------------------------|------------|-----------|------------|------------|-----------|
| Full Data                    | -0.1222066 | 0.0165703 | -0.1546837 | -0.0897295 | 0.0000000 |
| Most views on organization   | 0.0927612  | 0.0389955 | 0.0163315  | 0.1691909  | 0.0173705 |
| Middle views on organization | -0.1540366 | 0.0258974 | -0.2047946 | -0.1032786 | 0.0000000 |
| Least views on organization  | -0.2244562 | 0.0250164 | -0.2734875 | -0.1754249 | 0.0000000 |

Table A.20: Effect of disruptions on Ideologically aligned terms views/Total views

| Sample                       | ATT.avg    | S.E.      | CI.lower   | CI.upper  | p.value   |
|------------------------------|------------|-----------|------------|-----------|-----------|
| Full Data                    | -0.0000455 | 0.0000492 | -0.0001420 | 5.10e-05  | 0.3555419 |
| Most views on organization   | 0.0003666  | 0.0000839 | 0.0002021  | 5.31e-04  | 0.0000125 |
| Middle views on organization | -0.0001290 | 0.0000702 | -0.0002666 | 8.60e-06  | 0.0661957 |
| Least views on organization  | -0.0002332 | 0.0001002 | -0.0004296 | -3.69e-05 | 0.0198882 |

Table A.21: Effect of disruptions on Ideologically aligned comments by audience members

| Sample                       | ATT.avg    | S.E.      | CI.lower   | CI.upper   | p.value   |
|------------------------------|------------|-----------|------------|------------|-----------|
| Full Data                    | -0.0061836 | 0.0030674 | -0.0121956 | -0.0001716 | 0.0438097 |
| Most views on organization   | 0.0207883  | 0.0058222 | 0.0093770  | 0.0321996  | 0.0003563 |
| Middle views on organization | -0.0011577 | 0.0041969 | -0.0093834 | 0.0070680  | 0.7826648 |
| Least views on organization  | -0.0291491 | 0.0056645 | -0.0402513 | -0.0180470 | 0.0000003 |

Table A.22: Effect of disruptions on Ideologically aligned comments/total comments

| Sample                       | ATT.avg    | S.E.      | CI.lower   | CI.upper  | p.value   |
|------------------------------|------------|-----------|------------|-----------|-----------|
| Full Data                    | 0.0000747  | 0.0001921 | -0.0003018 | 0.0004511 | 0.6974845 |
| Most views on organization   | 0.0006570  | 0.0004793 | -0.0002824 | 0.0015965 | 0.1704491 |
| Middle views on organization | 0.0001561  | 0.0002940 | -0.0004201 | 0.0007323 | 0.5953552 |
| Least views on organization  | -0.0004184 | 0.0003059 | -0.0010180 | 0.0001812 | 0.1714664 |

## Effect of disruptions on total engagement

Table A.23: Effect of disruptions on Total views of content

| Sample                       | ATT.avg    | S.E.     | CI.lower  | CI.upper   | p.value   |
|------------------------------|------------|----------|-----------|------------|-----------|
| Full Data                    | -21.702596 | 1.886544 | -25.40015 | -18.005038 | 0.0000000 |
| Most views on organization   | -6.290998  | 4.788375 | -15.67604 | 3.094045   | 0.1889114 |
| Middle views on organization | -19.719365 | 3.053820 | -25.70474 | -13.733987 | 0.0000000 |
| Least views on organization  | -34.535401 | 2.965923 | -40.34850 | -28.722299 | 0.0000000 |

Table A.24: Effect of disruptions on Total outdegree

| Sample                       | ATT.avg    | S.E.      | CI.lower   | CI.upper   | p.value   |
|------------------------------|------------|-----------|------------|------------|-----------|
| Full Data                    | -1.2662548 | 0.1595925 | -1.5790505 | -0.9534592 | 0.0000000 |
| Most views on organization   | 0.7193552  | 0.3033516 | 0.1247971  | 1.3139134  | 0.0177228 |
| Middle views on organization | -1.0355603 | 0.2163987 | -1.4596941 | -0.6114266 | 0.0000017 |
| Least views on organization  | -2.8253224 | 0.3174818 | -3.4475753 | -2.2030696 | 0.0000000 |

Table A.25: Effect of disruptions on Total indegree

| Sample                       | ATT.avg   | S.E.      | CI.lower    | CI.upper   | p.value   |
|------------------------------|-----------|-----------|-------------|------------|-----------|
| Full Data                    | -4.197962 | 1.7650889 | -7.6574729  | -0.7384517 | 0.0173913 |
| Most views on organization   | 1.028719  | 0.6646712 | -0.2740125  | 2.3314506  | 0.1216918 |
| Middle views on organization | -2.046944 | 0.9688723 | -3.9458987  | -0.1479892 | 0.0346258 |
| Least views on organization  | -9.701019 | 4.5699625 | -18.6579814 | -0.7440576 | 0.0337724 |

## Tabular results for average ATT for short time frame with sampled control groups

Table A.26: Effect of disruptions on Views on hateful content

| Sample                       | ATT.avg    | S.E.      | CI.lower   | CI.upper   | p.value |
|------------------------------|------------|-----------|------------|------------|---------|
| Full Data                    | -0.3151528 | 0.0384450 | -0.3905036 | -0.2398020 | 0e+00   |
| Most views on organization   | 0.4315875  | 0.0848818 | 0.2652222  | 0.5979528  | 4e-07   |
| Middle views on organization | -0.2737100 | 0.0480621 | -0.3679100 | -0.1795099 | 0e+00   |
| Least views on organization  | -0.5537361 | 0.0523091 | -0.6562601 | -0.4512121 | 0e+00   |

Table A.27: Effect of disruptions on Views on hateful content/total views

| Sample                       | ATT.avg    | S.E.      | CI.lower   | CI.upper   | p.value   |
|------------------------------|------------|-----------|------------|------------|-----------|
| Full Data                    | 0.0000238  | 0.0000707 | -0.0001147 | 0.0001623  | 0.7363851 |
| Most views on organization   | 0.0009046  | 0.0001311 | 0.0006476  | 0.0011616  | 0.0000000 |
| Middle views on organization | 0.0001031  | 0.0001028 | -0.0000985 | 0.0003046  | 0.3161863 |
| Least views on organization  | -0.0005286 | 0.0001363 | -0.0007957 | -0.0002615 | 0.0001050 |

Table A.28: Effect of disruptions on Views on non-organization content that is hateful

| Sample                       | ATT.avg    | S.E.      | CI.lower   | CI.upper   | p.value |
|------------------------------|------------|-----------|------------|------------|---------|
| Full Data                    | -0.3193179 | 0.0362052 | -0.3902787 | -0.2483570 | 0e+00   |
| Most views on organization   | 0.4291235  | 0.0847520 | 0.2630125  | 0.5952344  | 4e-07   |
| Middle views on organization | -0.2765560 | 0.0479759 | -0.3705870 | -0.1825251 | 0e+00   |
| Least views on organization  | -0.5536216 | 0.0523076 | -0.6561426 | -0.4511006 | 0e+00   |

Table A.29: Effect of disruptions on Hateful comments by audience members

| Sample                       | ATT.avg    | S.E.      | CI.lower   | CI.upper   | p.value   |
|------------------------------|------------|-----------|------------|------------|-----------|
| Full Data                    | -0.0257379 | 0.0131199 | -0.0514525 | -0.0000234 | 0.0497921 |
| Most views on organization   | 0.0689081  | 0.0225802 | 0.0246518  | 0.1131644  | 0.0022754 |
| Middle views on organization | -0.0224675 | 0.0163076 | -0.0544298 | 0.0094947  | 0.1682847 |
| Least views on organization  | -0.0944791 | 0.0242901 | -0.1420868 | -0.0468715 | 0.0001004 |

Table A.30: Effect of disruptions on Hateful comments/total comments

| Sample                       | ATT.avg    | S.E.      | CI.lower   | CI.upper  | p.value   |
|------------------------------|------------|-----------|------------|-----------|-----------|
| Full Data                    | 0.0002634  | 0.0004476 | -0.0006140 | 0.0011408 | 0.5562681 |
| Most views on organization   | 0.0017740  | 0.0009266 | -0.0000421 | 0.0035901 | 0.0555587 |
| Middle views on organization | 0.0004418  | 0.0006900 | -0.0009106 | 0.0017942 | 0.5219534 |
| Least views on organization  | -0.0007216 | 0.0007537 | -0.0021988 | 0.0007556 | 0.3383677 |

Table A.31: Effect of disruptions on Hateful audience outdegree

| Sample                       | ATT.avg    | S.E.      | CI.lower   | CI.upper   | p.value   |
|------------------------------|------------|-----------|------------|------------|-----------|
| Full Data                    | -0.0031727 | 0.0025944 | -0.0082575 | 0.0019122  | 0.2213594 |
| Most views on organization   | 0.0135324  | 0.0088783 | -0.0038688 | 0.0309335  | 0.1274572 |
| Middle views on organization | -0.0065904 | 0.0031396 | -0.0127440 | -0.0004368 | 0.0358078 |
| Least views on organization  | -0.0246268 | 0.0031850 | -0.0308693 | -0.0183843 | 0.0000000 |

Table A.32: Effect of disruptions on Hateful non-audience outdegree

| Sample                       | ATT.avg    | S.E.      | CI.lower   | CI.upper   | p.value   |
|------------------------------|------------|-----------|------------|------------|-----------|
| Full Data                    | -0.0034409 | 0.0626131 | -0.1261604 | 0.1192786  | 0.9561749 |
| Most views on organization   | 0.0920413  | 0.0243350 | 0.0443455  | 0.1397371  | 0.0001554 |
| Middle views on organization | -0.0161645 | 0.0176384 | -0.0507351 | 0.0184061  | 0.3594364 |
| Least views on organization  | -0.1479424 | 0.0263248 | -0.1995382 | -0.0963467 | 0.0000000 |

Table A.33: Effect of disruptions on Audience indegree

| Sample                       | ATT.avg    | S.E.      | CI.lower   | CI.upper   | p.value   |
|------------------------------|------------|-----------|------------|------------|-----------|
| Full Data                    | -0.2003304 | 0.0333413 | -0.2656782 | -0.1349826 | 0.0000000 |
| Most views on organization   | 0.0727585  | 0.0675733 | -0.0596827 | 0.2051997  | 0.2815989 |
| Middle views on organization | -0.1948741 | 0.0479748 | -0.2889029 | -0.1008453 | 0.0000487 |
| Least views on organization  | -0.3918253 | 0.0362949 | -0.4629621 | -0.3206885 | 0.0000000 |

Table A.34: Effect of disruptions on Audience outdegree

| Sample                       | ATT.avg    | S.E.      | CI.lower   | CI.upper   | p.value   |
|------------------------------|------------|-----------|------------|------------|-----------|
| Full Data                    | -0.1762565 | 0.0192446 | -0.2139752 | -0.1385378 | 0.0000000 |
| Most views on organization   | 0.0265541  | 0.0421107 | -0.0559813 | 0.1090896  | 0.5283158 |
| Middle views on organization | -0.1767287 | 0.0240067 | -0.2237810 | -0.1296764 | 0.0000000 |
| Least views on organization  | -0.3270059 | 0.0252425 | -0.3764802 | -0.2775316 | 0.0000000 |

Table A.35: Effect of disruptions on Audience indegree/total indegree

| Sample                       | ATT.avg    | S.E.      | CI.lower   | CI.upper   | p.value   |
|------------------------------|------------|-----------|------------|------------|-----------|
| Full Data                    | -0.0063214 | 0.0005768 | -0.0074518 | -0.0051909 | 0.0000000 |
| Most views on organization   | -0.0047866 | 0.0013758 | -0.0074832 | -0.0020901 | 0.0005031 |
| Middle views on organization | -0.0053820 | 0.0007966 | -0.0069433 | -0.0038207 | 0.0000000 |
| Least views on organization  | -0.0086546 | 0.0007325 | -0.0100903 | -0.0072189 | 0.0000000 |

Table A.36: Effect of disruptions on Audience outdegree/total outdegree

| Sample                       | ATT.avg    | S.E.      | CI.lower   | CI.upper   | p.value |
|------------------------------|------------|-----------|------------|------------|---------|
| Full Data                    | -0.0120886 | 0.0005976 | -0.0132599 | -0.0109173 | 0       |
| Most views on organization   | -0.0092987 | 0.0013298 | -0.0119050 | -0.0066924 | 0       |
| Middle views on organization | -0.0112862 | 0.0008514 | -0.0129548 | -0.0096175 | 0       |
| Least views on organization  | -0.0149279 | 0.0008220 | -0.0165389 | -0.0133169 | 0       |

**Tabular results for average ATT for long timeframe with sampled control groups**

Table A.37: Effect of disruptions on Views on hateful content

| Sample                       | ATT.avg    | S.E.      | CI.lower   | CI.upper   | p.value |
|------------------------------|------------|-----------|------------|------------|---------|
| Full Data                    | -0.7989785 | 0.0328001 | -0.8632655 | -0.7346916 | 0.0e+00 |
| Most views on organization   | -0.7140833 | 0.1340065 | -0.9767313 | -0.4514354 | 1.0e-07 |
| Middle views on organization | -0.7381267 | 0.0478459 | -0.8319030 | -0.6443504 | 0.0e+00 |
| Least views on organization  | -0.7093820 | 0.1585811 | -1.0201952 | -0.3985688 | 7.7e-06 |

Table A.38: Effect of disruptions on Views on hateful content/total views

| Sample                       | ATT.avg    | S.E.      | CI.lower   | CI.upper   | p.value |
|------------------------------|------------|-----------|------------|------------|---------|
| Full Data                    | -0.0010697 | 0.0000844 | -0.0012352 | -0.0009042 | 0       |
| Most views on organization   | -0.0007302 | 0.0001106 | -0.0009470 | -0.0005134 | 0       |
| Middle views on organization | -0.0009248 | 0.0000901 | -0.0011014 | -0.0007483 | 0       |
| Least views on organization  | -0.0014009 | 0.0001142 | -0.0016248 | -0.0011770 | 0       |

Table A.39: Effect of disruptions on Views on non-organization content that is hateful

| Sample                       | ATT.avg    | S.E.      | CI.lower   | CI.upper   | p.value |
|------------------------------|------------|-----------|------------|------------|---------|
| Full Data                    | -0.7979036 | 0.0335466 | -0.8636537 | -0.7321535 | 0.0e+00 |
| Most views on organization   | -0.7015842 | 0.1288960 | -0.9542157 | -0.4489527 | 1.0e-07 |
| Middle views on organization | -0.7383135 | 0.0512270 | -0.8387166 | -0.6379105 | 0.0e+00 |
| Least views on organization  | -0.7092799 | 0.1549143 | -1.0129063 | -0.4056536 | 4.7e-06 |

Table A.40: Effect of disruptions on Hateful comments by audience members

| Sample                       | ATT.avg    | S.E.      | CI.lower   | CI.upper   | p.value   |
|------------------------------|------------|-----------|------------|------------|-----------|
| Full Data                    | -0.0777296 | 0.0092045 | -0.0957702 | -0.0596890 | 0.0000000 |
| Most views on organization   | -0.0259417 | 0.0141088 | -0.0535945 | 0.0017110  | 0.0659608 |
| Middle views on organization | -0.0559581 | 0.0103389 | -0.0762218 | -0.0356943 | 0.0000001 |
| Least views on organization  | -0.1399490 | 0.0186703 | -0.1765422 | -0.1033559 | 0.0000000 |

Table A.41: Effect of disruptions on Hateful comments/total comments

| Sample                       | ATT.avg    | S.E.      | CI.lower   | CI.upper   | p.value   |
|------------------------------|------------|-----------|------------|------------|-----------|
| Full Data                    | -0.0010250 | 0.0005109 | -0.0020264 | -0.0000236 | 0.0448351 |
| Most views on organization   | 0.0001657  | 0.0007276 | -0.0012604 | 0.0015918  | 0.8198733 |
| Middle views on organization | -0.0007232 | 0.0006203 | -0.0019389 | 0.0004926  | 0.2436730 |
| Least views on organization  | -0.0020174 | 0.0006465 | -0.0032846 | -0.0007503 | 0.0018059 |

Table A.42: Effect of disruptions on Hateful audience outdegree

| Sample                       | ATT.avg    | S.E.      | CI.lower   | CI.upper   | p.value |
|------------------------------|------------|-----------|------------|------------|---------|
| Full Data                    | -0.0195047 | 0.0016070 | -0.0226544 | -0.0163551 | 0       |
| Most views on organization   | -0.0319411 | 0.0055755 | -0.0428688 | -0.0210133 | 0       |
| Middle views on organization | -0.0173176 | 0.0020675 | -0.0213699 | -0.0132654 | 0       |
| Least views on organization  | -0.0253511 | 0.0019695 | -0.0292113 | -0.0214909 | 0       |

Table A.43: Effect of disruptions on Hateful non-audience outdegree

| Sample                       | ATT.avg    | S.E.      | CI.lower   | CI.upper   | p.value   |
|------------------------------|------------|-----------|------------|------------|-----------|
| Full Data                    | -0.1447911 | 0.0242806 | -0.1923802 | -0.0972020 | 0.0000000 |
| Most views on organization   | -0.0502146 | 0.0162224 | -0.0820099 | -0.0184193 | 0.0019656 |
| Middle views on organization | -0.0716185 | 0.0157570 | -0.1025017 | -0.0407354 | 0.0000055 |
| Least views on organization  | -0.0918812 | 0.0640820 | -0.2174796 | 0.0337171  | 0.1516271 |

Table A.44: Effect of disruptions on Audience indegree

| Sample                       | ATT.avg    | S.E.      | CI.lower   | CI.upper   | p.value |
|------------------------------|------------|-----------|------------|------------|---------|
| Full Data                    | -0.2615763 | 0.0212380 | -0.3032021 | -0.2199505 | 0       |
| Most views on organization   | -0.2598409 | 0.0436936 | -0.3454787 | -0.1742030 | 0       |
| Middle views on organization | -0.2281616 | 0.0315318 | -0.2899628 | -0.1663603 | 0       |
| Least views on organization  | -0.3126848 | 0.0238514 | -0.3594327 | -0.2659368 | 0       |

Table A.45: Effect of disruptions on Audience outdegree

| Sample                       | ATT.avg    | S.E.      | CI.lower   | CI.upper   | p.value |
|------------------------------|------------|-----------|------------|------------|---------|
| Full Data                    | -0.2540554 | 0.0123114 | -0.2781853 | -0.2299255 | 0       |
| Most views on organization   | -0.3228661 | 0.0288956 | -0.3795004 | -0.2662317 | 0       |
| Middle views on organization | -0.2198782 | 0.0166161 | -0.2524453 | -0.1873112 | 0       |
| Least views on organization  | -0.2678722 | 0.0150458 | -0.2973615 | -0.2383830 | 0       |

Table A.46: Effect of disruptions on Audience indegree/total indegree

| Sample                       | ATT.avg    | S.E.      | CI.lower   | CI.upper   | p.value |
|------------------------------|------------|-----------|------------|------------|---------|
| Full Data                    | -0.0074826 | 0.0004312 | -0.0083277 | -0.0066375 | 0       |
| Most views on organization   | -0.0101620 | 0.0008893 | -0.0119050 | -0.0084189 | 0       |
| Middle views on organization | -0.0063567 | 0.0006086 | -0.0075496 | -0.0051639 | 0       |
| Least views on organization  | -0.0072777 | 0.0005123 | -0.0082818 | -0.0062735 | 0       |

Table A.47: Effect of disruptions on Audience outdegree/total outdegree

| Sample                       | ATT.avg    | S.E.      | CI.lower   | CI.upper   | p.value |
|------------------------------|------------|-----------|------------|------------|---------|
| Full Data                    | -0.0149596 | 0.0003735 | -0.0156916 | -0.0142276 | 0       |
| Most views on organization   | -0.0181786 | 0.0007743 | -0.0196962 | -0.0166610 | 0       |
| Middle views on organization | -0.0139031 | 0.0005685 | -0.0150175 | -0.0127888 | 0       |
| Least views on organization  | -0.0141052 | 0.0005299 | -0.0151438 | -0.0130665 | 0       |



# Effects over time plots for all manuscript outcomes for long timeframe with sampled control groups

## Consumption

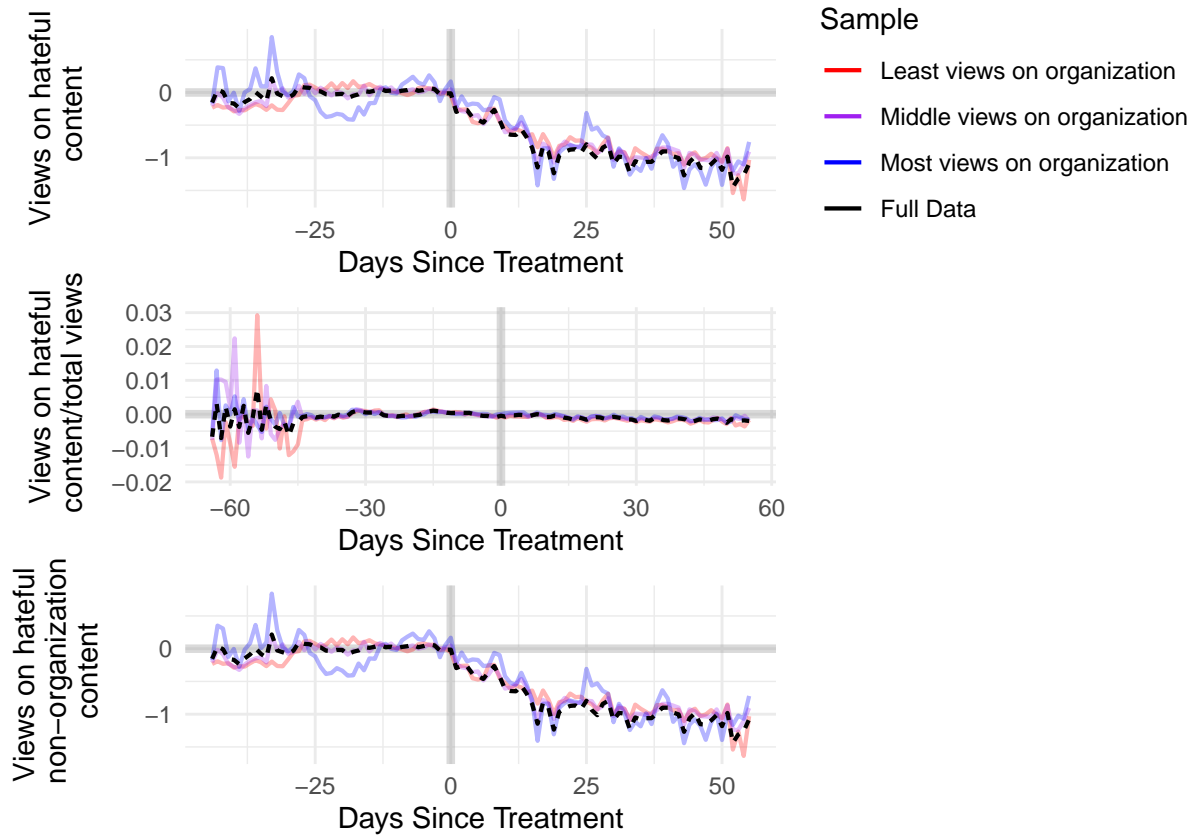

*Production*

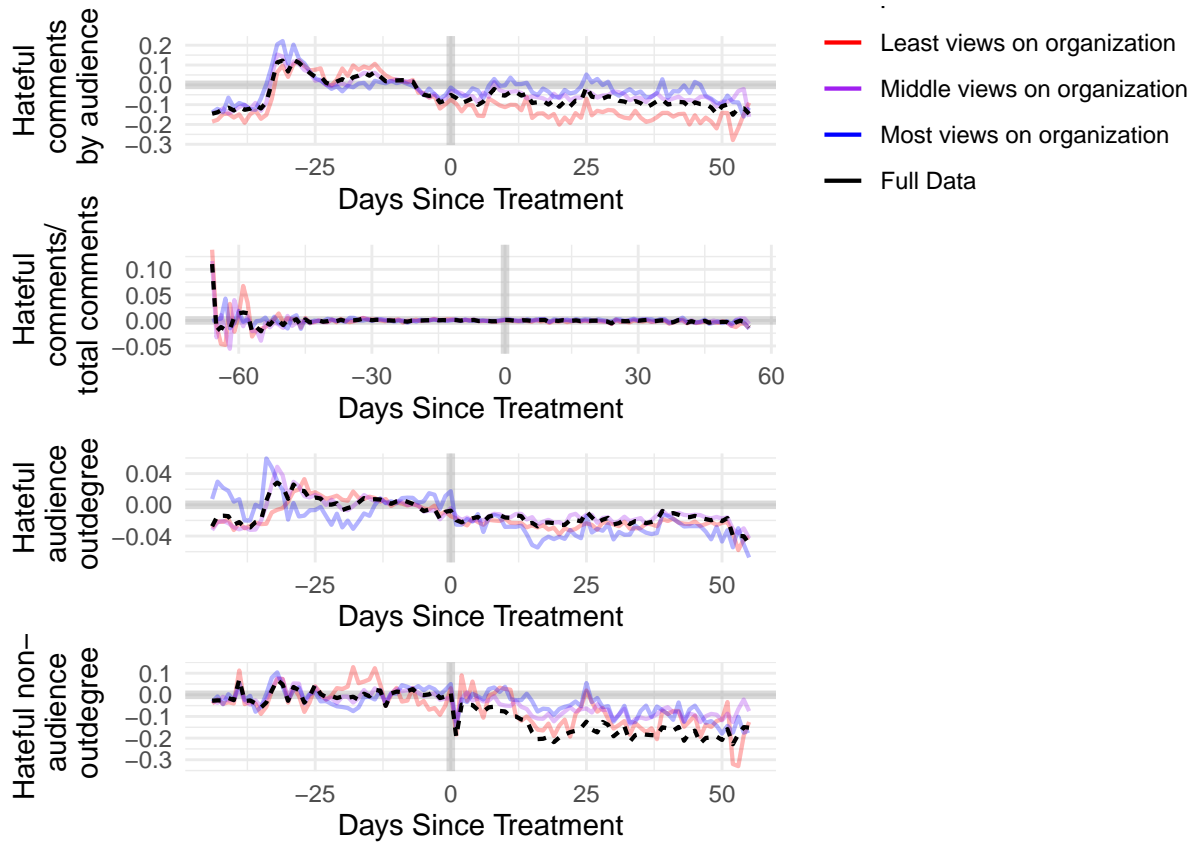

Network behavior

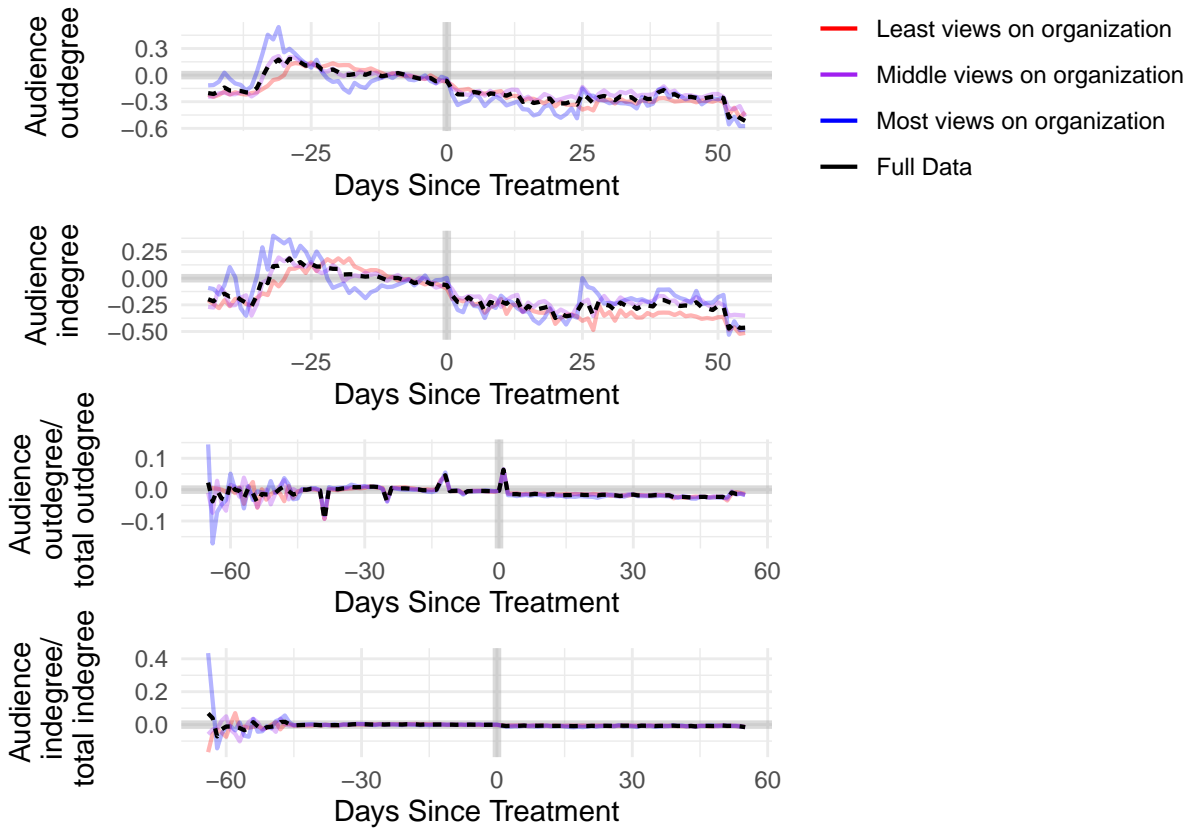

**Two Way Fixed Effects (OLS) for manuscript outcomes for short time frame with no sampled control groups**

Table A.48: Two way fixed effects OLS estimates for Views on hate content with short time frame sample

| Sample                       | Estimate   | Std..Error | t.value   | Pr...t..  | nobs    |
|------------------------------|------------|------------|-----------|-----------|---------|
| Full Data                    | -0.1990560 | 0.1066475  | -1.866486 | 0.1209584 | 1186155 |
| Most views on organization   | 0.3907787  | 0.2421269  | 1.613941  | 0.1674601 | 264915  |
| Middle views on organization | -0.2455907 | 0.0804987  | -3.050866 | 0.0283962 | 499230  |
| Least views on organization  | -0.5689806 | 0.1711436  | -3.324581 | 0.0209029 | 422010  |

Table A.49: Two way fixed effects OLS estimates for Views on hate content/total views with short time frame sample

| Sample                       | Estimate   | Std..Error | t.value    | Pr...t..  | nobs    |
|------------------------------|------------|------------|------------|-----------|---------|
| Full Data                    | -0.0000834 | 0.0002687  | -0.3103631 | 0.7688050 | 1122349 |
| Most views on organization   | 0.0008187  | 0.0004249  | 1.9268320  | 0.1119439 | 257132  |
| Middle views on organization | 0.0000011  | 0.0003140  | 0.0036426  | 0.9972345 | 480312  |
| Least views on organization  | -0.0008192 | 0.0002474  | -3.3114352 | 0.0212069 | 384905  |

Table A.50: Two way fixed effects OLS estimates for Views on non-organization content that is hateful with short time frame sample

| Sample                       | Estimate   | Std..Error | t.value   | Pr...t..  | nobs    |
|------------------------------|------------|------------|-----------|-----------|---------|
| Full Data                    | -0.2032864 | 0.1084142  | -1.875089 | 0.1196288 | 1186155 |
| Most views on organization   | 0.3800011  | 0.2379185  | 1.597190  | 0.1711134 | 264915  |
| Middle views on organization | -0.2489584 | 0.0810974  | -3.069869 | 0.0277880 | 499230  |
| Least views on organization  | -0.5688594 | 0.1710978  | -3.324762 | 0.0208987 | 422010  |

Table A.51: Two way fixed effects OLS estimates for Hateful comments by audience members with short time frame sample

| Sample                       | Estimate   | Std..Error | t.value   | Pr...t..  | nobs    |
|------------------------------|------------|------------|-----------|-----------|---------|
| Full Data                    | -0.0297189 | 0.0237445  | -1.251613 | 0.2660752 | 1186155 |
| Most views on organization   | 0.0774399  | 0.0229021  | 3.381343  | 0.0196455 | 264915  |
| Middle views on organization | -0.0205614 | 0.0189886  | -1.082826 | 0.3283189 | 499230  |
| Least views on organization  | -0.1128372 | 0.0476145  | -2.369807 | 0.0639680 | 422010  |

Table A.52: Two way fixed effects OLS estimates for Hateful comments/total comments with short time frame sample

| Sample                       | Estimate   | Std..Error | t.value    | Pr...t..  | nobs   |
|------------------------------|------------|------------|------------|-----------|--------|
| Full Data                    | -0.0001676 | 0.0004982  | -0.3364560 | 0.7501884 | 743156 |
| Most views on organization   | 0.0022326  | 0.0015330  | 1.4563419  | 0.2050749 | 172521 |
| Middle views on organization | -0.0001556 | 0.0002919  | -0.5330512 | 0.6168301 | 299120 |
| Least views on organization  | -0.0018622 | 0.0005742  | -3.2431208 | 0.0228698 | 271515 |

Table A.53: Two way fixed effects OLS estimates for Hateful audience outdegree with short time frame sample

| Sample                       | Estimate   | Std..Error | t.value    | Pr...t..  | nobs    |
|------------------------------|------------|------------|------------|-----------|---------|
| Full Data                    | -0.0046072 | 0.0047561  | -0.9686978 | 0.3771864 | 1186155 |
| Most views on organization   | 0.0342608  | 0.0177816  | 1.9267589  | 0.1119544 | 264915  |
| Middle views on organization | -0.0075116 | 0.0040516  | -1.8539812 | 0.1229180 | 499230  |
| Least views on organization  | -0.0285906 | 0.0093054  | -3.0724673 | 0.0277059 | 422010  |

Table A.54: Two way fixed effects OLS estimates for Hateful non-audience outdegree with short time frame sample

| Sample                       | Estimate   | Std..Error | t.value   | Pr...t..  | nobs    |
|------------------------------|------------|------------|-----------|-----------|---------|
| Full Data                    | -0.0532186 | 0.0216565  | -2.457393 | 0.0574122 | 1186155 |
| Most views on organization   | 0.0810481  | 0.0521654  | 1.553675  | 0.1809743 | 264915  |
| Middle views on organization | -0.0207713 | 0.0162307  | -1.279752 | 0.2567946 | 499230  |
| Least views on organization  | -0.1819459 | 0.0358169  | -5.079886 | 0.0038348 | 422010  |

Table A.55: Two way fixed effects OLS estimates for Audience indegree with short time frame sample

| Sample                       | Estimate   | Std..Error | t.value   | Pr...t..  | nobs    |
|------------------------------|------------|------------|-----------|-----------|---------|
| Full Data                    | -0.1907099 | 0.0734890  | -2.595080 | 0.0485375 | 1186155 |
| Most views on organization   | 0.1397435  | 0.0738916  | 1.891197  | 0.1171798 | 264915  |
| Middle views on organization | -0.1955748 | 0.0809642  | -2.415572 | 0.0604468 | 499230  |
| Least views on organization  | -0.4144298 | 0.1452488  | -2.853240 | 0.0356879 | 422010  |

Table A.56: Two way fixed effects OLS estimates for Audience outdegree with short time frame sample

| Sample                       | Estimate   | Std..Error | t.value   | Pr...t..  | nobs    |
|------------------------------|------------|------------|-----------|-----------|---------|
| Full Data                    | -0.1659381 | 0.0655338  | -2.532100 | 0.0523957 | 1186155 |
| Most views on organization   | 0.1123000  | 0.0989031  | 1.135454  | 0.3076642 | 264915  |
| Middle views on organization | -0.1745024 | 0.0630847  | -2.766161 | 0.0395448 | 499230  |
| Least views on organization  | -0.3514164 | 0.1306717  | -2.689308 | 0.0433345 | 422010  |

Table A.57: Two way fixed effects OLS estimates for Audience indegree/total indegree with short time frame sample

| Sample                       | Estimate   | Std..Error | t.value   | Pr...t..  | nobs   |
|------------------------------|------------|------------|-----------|-----------|--------|
| Full Data                    | -0.0054320 | 0.0013118  | -4.140845 | 0.0089897 | 916080 |
| Most views on organization   | -0.0027445 | 0.0015983  | -1.717167 | 0.1465965 | 209509 |
| Middle views on organization | -0.0046203 | 0.0015691  | -2.944613 | 0.0320848 | 375263 |
| Least views on organization  | -0.0091136 | 0.0027116  | -3.361013 | 0.0200857 | 331308 |

Table A.58: Two way fixed effects OLS estimates for Audience outdegree/total outdegree with short time frame sample

| Sample                       | Estimate   | Std..Error | t.value    | Pr...t..  | nobs   |
|------------------------------|------------|------------|------------|-----------|--------|
| Full Data                    | -0.0044286 | 0.0070695  | -0.6264301 | 0.5585174 | 985292 |
| Most views on organization   | -0.0005328 | 0.0052642  | -0.1012202 | 0.9233094 | 227333 |
| Middle views on organization | -0.0036095 | 0.0070674  | -0.5107227 | 0.6312882 | 413933 |
| Least views on organization  | -0.0094451 | 0.0086688  | -1.0895532 | 0.3256137 | 344026 |

## Alternative Two Way Fixed Effects (OLS) models for ratio outcomes

In the manuscript, we present results for ratio outcomes, where observations are missing when the denominator is 0. Here, we present results for models where the numerator of the ratios is the outcome, and the denominator enters as a covariate. Results are largely consistent with the ratio approach.

Table A.59: Two way fixed effects OLS estimates for Views on hate content with short time frame sample, controlling for total views

| Sample                       | Estimate   | Std..Error | t.value    | Pr...t..  | nobs    |
|------------------------------|------------|------------|------------|-----------|---------|
| Full Data                    | -0.0005002 | 0.1156095  | -0.0043262 | 0.9967155 | 1186155 |
| Most views on organization   | 0.4802098  | 0.2371796  | 2.0246671  | 0.0987806 | 264915  |
| Middle views on organization | -0.0830893 | 0.0730298  | -1.1377454 | 0.3067912 | 499230  |
| Least views on organization  | -0.2914535 | 0.0989491  | -2.9454886 | 0.0320523 | 422010  |

Table A.60: Two way fixed effects OLS estimates for Hateful comments by audience members with short time frame sample, controlling for total comments

| Sample                       | Estimate   | Std..Error | t.value    | Pr...t..  | nobs    |
|------------------------------|------------|------------|------------|-----------|---------|
| Full Data                    | 0.0204585  | 0.0107410  | 1.9047071  | 0.1151656 | 1186155 |
| Most views on organization   | 0.0710032  | 0.0188401  | 3.7687354  | 0.0130399 | 264915  |
| Middle views on organization | 0.0128305  | 0.0068082  | 1.8845608  | 0.1181825 | 499230  |
| Least views on organization  | -0.0028961 | 0.0173356  | -0.1670578 | 0.8738707 | 422010  |

Table A.61: Two way fixed effects OLS estimates for Audience indegree with short time frame sample, controlling for total indegree

| Sample                       | Estimate   | Std..Error | t.value   | Pr...t..  | nobs    |
|------------------------------|------------|------------|-----------|-----------|---------|
| Full Data                    | -0.1746829 | 0.0630675  | -2.769776 | 0.0393758 | 1186155 |
| Most views on organization   | 0.1095120  | 0.0576241  | 1.900454  | 0.1157957 | 264915  |
| Middle views on organization | -0.1678045 | 0.0811144  | -2.068740 | 0.0933892 | 499230  |
| Least views on organization  | -0.3904689 | 0.1263690  | -3.089910 | 0.0271622 | 422010  |

Table A.62: Two way fixed effects OLS estimates for Audience outdegree with short time frame sample, controlling for total outdegree

| Sample                       | Estimate   | Std..Error | t.value   | Pr..t..   | nobs    |
|------------------------------|------------|------------|-----------|-----------|---------|
| Full Data                    | -0.0944399 | 0.0413727  | -2.282661 | 0.0713004 | 1186155 |
| Most views on organization   | 0.0758254  | 0.0654636  | 1.158283  | 0.2990627 | 264915  |
| Middle views on organization | -0.1059871 | 0.0451826  | -2.345751 | 0.0659073 | 499230  |
| Least views on organization  | -0.2774829 | 0.0983211  | -2.822212 | 0.0370122 | 422010  |



## OLS with only time fixed effects for short time frame with no sampled control groups

Table A.63: OLS estimates for Views on hate content with short time frame sample and 1-way time fixed effects

| Sample                       | Estimate  | Std. Error | t value   | Pr(>  t ) | nobs    |
|------------------------------|-----------|------------|-----------|-----------|---------|
| Full Data                    | -2.385344 | 0.6963019  | -3.425732 | 0.0187217 | 1186155 |
| Most views on organization   | -2.867152 | 0.9881707  | -2.901474 | 0.0337327 | 264915  |
| Middle views on organization | -2.650097 | 0.6649459  | -3.985432 | 0.0104739 | 499230  |
| Least views on organization  | -1.742042 | 0.5224030  | -3.334672 | 0.0206728 | 422010  |

Table A.64: OLS estimates for Views on hate content/total views with short time frame sample and 1-way time fixed effects

| Sample                       | Estimate   | Std. Error | t value   | Pr(>  t ) | nobs    |
|------------------------------|------------|------------|-----------|-----------|---------|
| Full Data                    | -0.0044476 | 0.0015280  | -2.910796 | 0.0333688 | 1122349 |
| Most views on organization   | -0.0037076 | 0.0016541  | -2.241394 | 0.0750832 | 257132  |
| Middle views on organization | -0.0046611 | 0.0015391  | -3.028415 | 0.0291342 | 480312  |
| Least views on organization  | -0.0045588 | 0.0015050  | -3.029209 | 0.0291078 | 384905  |

Table A.65: OLS estimates for Views on non-organization content that is hateful with short time frame sample and 1-way time fixed effects

| Sample                       | Estimate  | Std. Error | t value   | Pr(>  t ) | nobs    |
|------------------------------|-----------|------------|-----------|-----------|---------|
| Full Data                    | -2.384133 | 0.6961565  | -3.424709 | 0.0187425 | 1186155 |
| Most views on organization   | -2.864452 | 0.9878503  | -2.899682 | 0.0338032 | 264915  |
| Middle views on organization | -2.649000 | 0.6648280  | -3.984488 | 0.0104838 | 499230  |
| Least views on organization  | -1.741714 | 0.5223468  | -3.334402 | 0.0206789 | 422010  |

Table A.66: OLS estimates for Hateful comments by audience members with short time frame sample and 1-way time fixed effects

| Sample                       | Estimate   | Std. Error | t value   | Pr(>  t ) | nobs    |
|------------------------------|------------|------------|-----------|-----------|---------|
| Full Data                    | -0.3353320 | 0.1081065  | -3.101866 | 0.0267965 | 1186155 |
| Most views on organization   | -0.2350926 | 0.1279616  | -1.837212 | 0.1255971 | 264915  |
| Middle views on organization | -0.3257870 | 0.1015308  | -3.208751 | 0.0237618 | 499230  |
| Least views on organization  | -0.4004488 | 0.1349493  | -2.967402 | 0.0312506 | 422010  |

Table A.67: OLS estimates for Hateful comments/total comments with short time frame sample and 1-way time fixed effects

| Sample                       | Estimate   | Std. Error | t value   | Pr(>  t ) | nobs   |
|------------------------------|------------|------------|-----------|-----------|--------|
| Full Data                    | -0.0129245 | 0.0038358  | -3.369412 | 0.0199025 | 743156 |
| Most views on organization   | -0.0106277 | 0.0047787  | -2.223958 | 0.0767454 | 172521 |
| Middle views on organization | -0.0141045 | 0.0036659  | -3.847444 | 0.0120323 | 299120 |
| Least views on organization  | -0.0129485 | 0.0045765  | -2.829309 | 0.0367045 | 271515 |

Table A.68: OLS estimates for Hateful audience outdegree with short time frame sample and 1-way time fixed effects

| Sample                       | Estimate   | Std. Error | t value   | Pr(>  t ) | nobs    |
|------------------------------|------------|------------|-----------|-----------|---------|
| Full Data                    | -0.0871111 | 0.0244997  | -3.555604 | 0.0162903 | 1186155 |
| Most views on organization   | -0.0996063 | 0.0398918  | -2.496912 | 0.0546964 | 264915  |
| Middle views on organization | -0.0898639 | 0.0216602  | -4.148813 | 0.0089203 | 499230  |
| Least views on organization  | -0.0743013 | 0.0165479  | -4.490079 | 0.0064583 | 422010  |

Table A.69: OLS estimates for Hateful non-audience outdegree with short time frame sample and 1-way time fixed effects

| Sample                       | Estimate   | Std. Error | t value   | Pr(>  t ) | nobs    |
|------------------------------|------------|------------|-----------|-----------|---------|
| Full Data                    | -0.4220383 | 0.1411774  | -2.989418 | 0.0304677 | 1186155 |
| Most views on organization   | -0.2111062 | 0.1253536  | -1.684086 | 0.1529835 | 264915  |
| Middle views on organization | -0.4188248 | 0.1136828  | -3.684154 | 0.0142319 | 499230  |
| Least views on organization  | -0.5445824 | 0.2287567  | -2.380618 | 0.0631166 | 422010  |

Table A.70: OLS estimates for Audience indegree with short time frame sample and 1-way time fixed effects

| Sample                       | Estimate   | Std. Error | t value   | Pr(>  t ) | nobs    |
|------------------------------|------------|------------|-----------|-----------|---------|
| Full Data                    | -0.9053440 | 0.2682272  | -3.375288 | 0.0197754 | 1186155 |
| Most views on organization   | -1.2585997 | 0.4275030  | -2.944072 | 0.0321049 | 264915  |
| Middle views on organization | -0.9433804 | 0.2831111  | -3.332191 | 0.0207291 | 499230  |
| Least views on organization  | -0.6218708 | 0.1629610  | -3.816072 | 0.0124228 | 422010  |

Table A.71: OLS estimates for Audience outdegree with short time frame sample and 1-way time fixed effects

| Sample                       | Estimate   | Std. Error | t value   | Pr(>  t ) | nobs    |
|------------------------------|------------|------------|-----------|-----------|---------|
| Full Data                    | -0.9179528 | 0.2412213  | -3.805438 | 0.0125585 | 1186155 |
| Most views on organization   | -1.2708372 | 0.3741343  | -3.396740 | 0.0193193 | 264915  |
| Middle views on organization | -0.9318440 | 0.2513725  | -3.707025 | 0.0138977 | 499230  |
| Least views on organization  | -0.6532548 | 0.1443432  | -4.525706 | 0.0062501 | 422010  |

Table A.72: OLS estimates for Audience indegree/total indegree with short time frame sample and 1-way time fixed effects

| Sample                       | Estimate   | Std. Error | t value   | Pr(>  t ) | nobs   |
|------------------------------|------------|------------|-----------|-----------|--------|
| Full Data                    | -0.0183966 | 0.0049728  | -3.699418 | 0.0140079 | 916080 |
| Most views on organization   | -0.0231040 | 0.0065133  | -3.547186 | 0.0164366 | 209509 |
| Middle views on organization | -0.0196003 | 0.0054423  | -3.601492 | 0.0155188 | 375263 |
| Least views on organization  | -0.0131111 | 0.0040760  | -3.216654 | 0.0235533 | 331308 |

Table A.73: OLS estimates for Audience outdegree/total outdegree with short time frame sample and 1-way time fixed effects

| Sample                       | Estimate   | Std. Error | t value    | Pr(>  t ) | nobs   |
|------------------------------|------------|------------|------------|-----------|--------|
| Full Data                    | -0.0171349 | 0.0118069  | -1.4512583 | 0.2064152 | 985292 |
| Most views on organization   | -0.0261036 | 0.0153778  | -1.6974905 | 0.1503625 | 227333 |
| Middle views on organization | -0.0193820 | 0.0130765  | -1.4822041 | 0.1983847 | 413933 |
| Least views on organization  | -0.0082785 | 0.0119591  | -0.6922303 | 0.5196183 | 344026 |

**Two Way Fixed Effects (OLS) for short time frame with p-values from wild cluster bootstrapping**

**Table A.74: Effect of disruptions on Views on hateful content**

| Sample                       | Estimate   | Std..Error | t.value   | Pr...t.. |
|------------------------------|------------|------------|-----------|----------|
| Full Data                    | -0.1990560 | 0.0333643  | -5.966141 | 0e+00    |
| Most views on organization   | 0.3907787  | 0.0638648  | 6.118839  | 0e+00    |
| Middle views on organization | -0.2455907 | 0.0460569  | -5.332327 | 1e-07    |
| Least views on organization  | -0.5689806 | 0.0713067  | -7.979338 | 0e+00    |

**Table A.75: Effect of disruptions on Views on hateful content/total views**

| Sample                       | Estimate   | Std..Error | t.value    | Pr...t..  |
|------------------------------|------------|------------|------------|-----------|
| Full Data                    | -0.0000834 | 0.0001004  | -0.8308849 | 0.4060388 |
| Most views on organization   | 0.0008187  | 0.0000969  | 8.4491605  | 0.0000000 |
| Middle views on organization | 0.0000011  | 0.0000930  | 0.0122944  | 0.9901907 |
| Least views on organization  | -0.0008192 | 0.0001945  | -4.2108405 | 0.0000254 |

**Table A.76: Effect of disruptions on Views on non-organization content that is hateful**

| Sample                       | Estimate   | Std..Error | t.value   | Pr...t.. |
|------------------------------|------------|------------|-----------|----------|
| Full Data                    | -0.2032864 | 0.0321678  | -6.319565 | 0e+00    |
| Most views on organization   | 0.3800011  | 0.0615454  | 6.174323  | 0e+00    |
| Middle views on organization | -0.2489584 | 0.0505967  | -4.920452 | 9e-07    |
| Least views on organization  | -0.5688594 | 0.0699426  | -8.133234 | 0e+00    |

**Table A.77: Effect of disruptions on Hateful comments by audience members**

| Sample                       | Estimate   | Std..Error | t.value   | Pr...t..  |
|------------------------------|------------|------------|-----------|-----------|
| Full Data                    | -0.0297189 | 0.0119448  | -2.488011 | 0.0128461 |
| Most views on organization   | 0.0774399  | 0.0117854  | 6.570820  | 0.0000000 |
| Middle views on organization | -0.0205614 | 0.0084137  | -2.443793 | 0.0145341 |
| Least views on organization  | -0.1128372 | 0.0270131  | -4.177133 | 0.0000295 |

Table A.78: Effect of disruptions on Hateful comments/total comments

| Sample                       | Estimate   | Std..Error | t.value    | Pr...t..  |
|------------------------------|------------|------------|------------|-----------|
| Full Data                    | -0.0001676 | 0.0003679  | -0.4555627 | 0.6487046 |
| Most views on organization   | 0.0022326  | 0.0006790  | 3.2881951  | 0.0010085 |
| Middle views on organization | -0.0001556 | 0.0005987  | -0.2599051 | 0.7949371 |
| Least views on organization  | -0.0018622 | 0.0003409  | -5.4630702 | 0.0000000 |

Table A.79: Effect of disruptions on Hateful audience outdegree

| Sample                       | Estimate   | Std..Error | t.value    | Pr...t..  |
|------------------------------|------------|------------|------------|-----------|
| Full Data                    | -0.0046072 | 0.0013304  | -3.463075  | 0.0005341 |
| Most views on organization   | 0.0342608  | 0.0067760  | 5.056209   | 0.0000004 |
| Middle views on organization | -0.0075116 | 0.0017533  | -4.284249  | 0.0000183 |
| Least views on organization  | -0.0285906 | 0.0017682  | -16.169179 | 0.0000000 |

Table A.80: Effect of disruptions on Hateful non-audience outdegree

| Sample                       | Estimate   | Std..Error | t.value    | Pr...t..  |
|------------------------------|------------|------------|------------|-----------|
| Full Data                    | -0.0532186 | 0.0081273  | -6.548167  | 0.0000000 |
| Most views on organization   | 0.0810481  | 0.0170379  | 4.756931   | 0.0000020 |
| Middle views on organization | -0.0207713 | 0.0147252  | -1.410598  | 0.1583638 |
| Least views on organization  | -0.1819459 | 0.0158629  | -11.469893 | 0.0000000 |

Table A.81: Effect of disruptions on Audience indegree

| Sample                       | Estimate   | Std..Error | t.value    | Pr...t..  |
|------------------------------|------------|------------|------------|-----------|
| Full Data                    | -0.1907099 | 0.0358611  | -5.318018  | 0.0000001 |
| Most views on organization   | 0.1397435  | 0.1142809  | 1.222807   | 0.2214037 |
| Middle views on organization | -0.1955748 | 0.0253319  | -7.720481  | 0.0000000 |
| Least views on organization  | -0.4144298 | 0.0331712  | -12.493658 | 0.0000000 |

Table A.82: Effect of disruptions on Audience outdegree

| Sample                       | Estimate   | Std..Error | t.value    | Pr...t..  |
|------------------------------|------------|------------|------------|-----------|
| Full Data                    | -0.1659381 | 0.0264880  | -6.264645  | 0.0000000 |
| Most views on organization   | 0.1123000  | 0.0524835  | 2.139721   | 0.0323783 |
| Middle views on organization | -0.1745024 | 0.0203001  | -8.596134  | 0.0000000 |
| Least views on organization  | -0.3514164 | 0.0241938  | -14.525059 | 0.0000000 |

Table A.83: Effect of disruptions on Audience indegree/total indegree

| Sample                       | Estimate   | Std..Error | t.value    | Pr...t..  |
|------------------------------|------------|------------|------------|-----------|
| Full Data                    | -0.0054320 | 0.0007521  | -7.222582  | 0.0000000 |
| Most views on organization   | -0.0027445 | 0.0011800  | -2.325875  | 0.0200262 |
| Middle views on organization | -0.0046203 | 0.0010791  | -4.281744  | 0.0000185 |
| Least views on organization  | -0.0091136 | 0.0007052  | -12.922743 | 0.0000000 |

Table A.84: Effect of disruptions on Audience outdegree/total outdegree

| Sample                       | Estimate   | Std..Error | t.value     | Pr...t..  |
|------------------------------|------------|------------|-------------|-----------|
| Full Data                    | -0.0044286 | 0.0003893  | -11.3753929 | 0.0000000 |
| Most views on organization   | -0.0005328 | 0.0016660  | -0.3198363  | 0.7490927 |
| Middle views on organization | -0.0036095 | 0.0004417  | -8.1711358  | 0.0000000 |
| Least views on organization  | -0.0094451 | 0.0006213  | -15.2025003 | 0.0000000 |

**Organization comparison plots for backlash outcomes**

*Views on hate content*

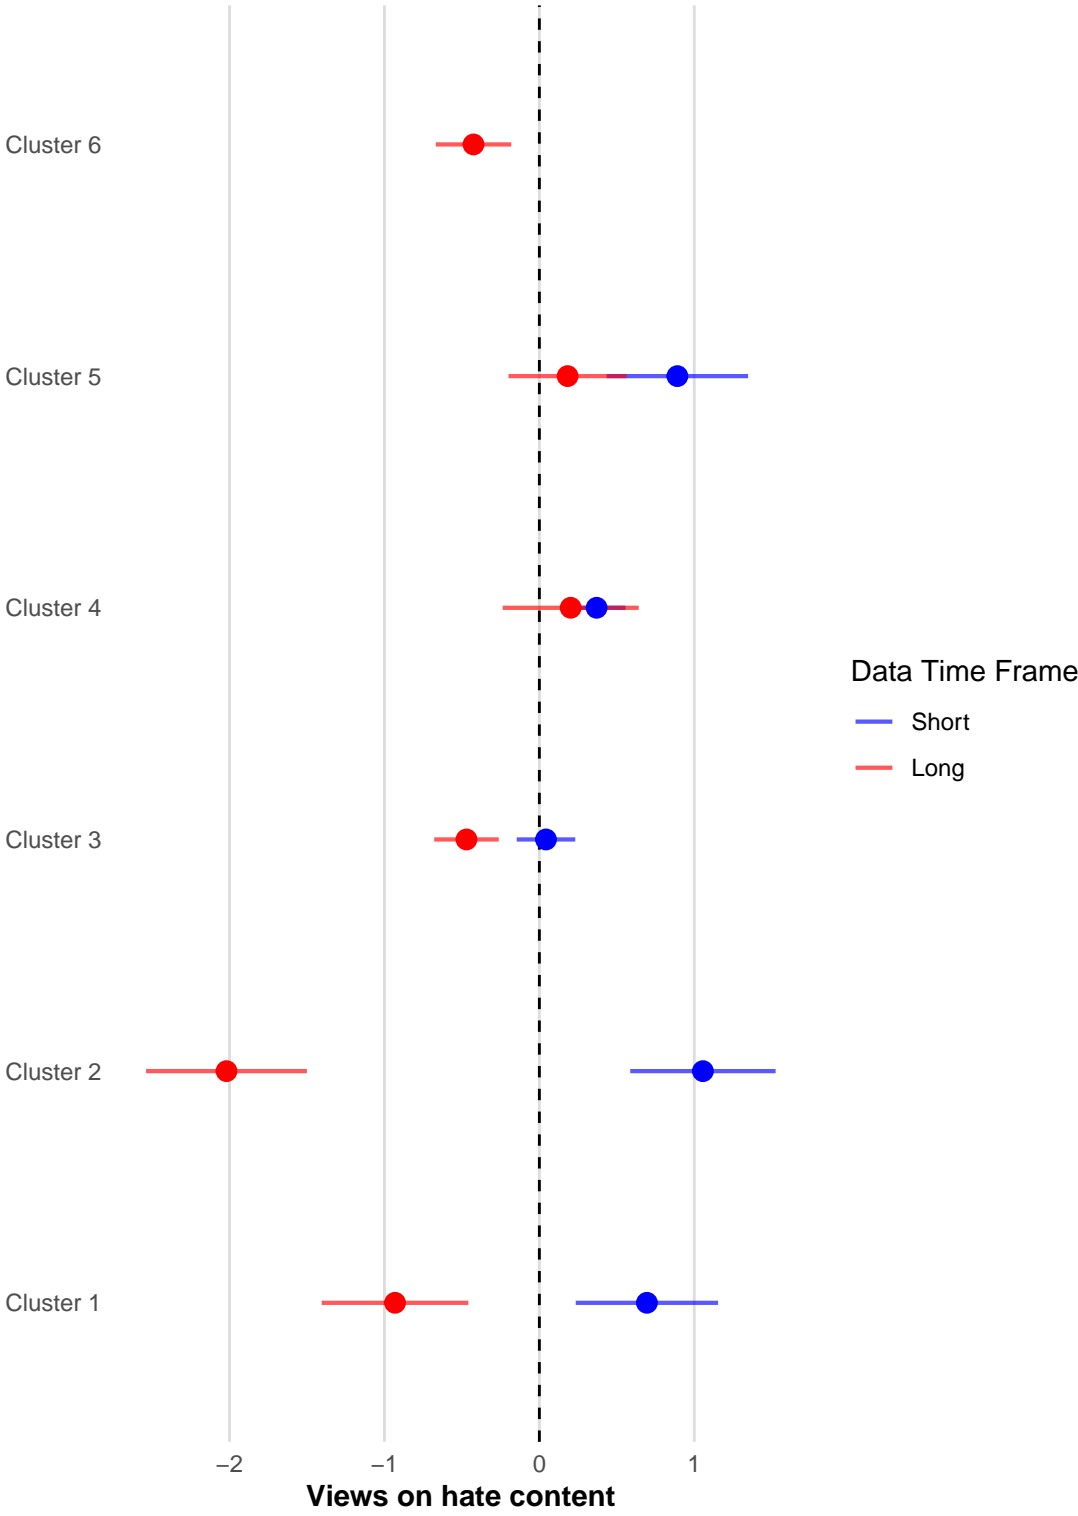



*Hateful comments by audience members*

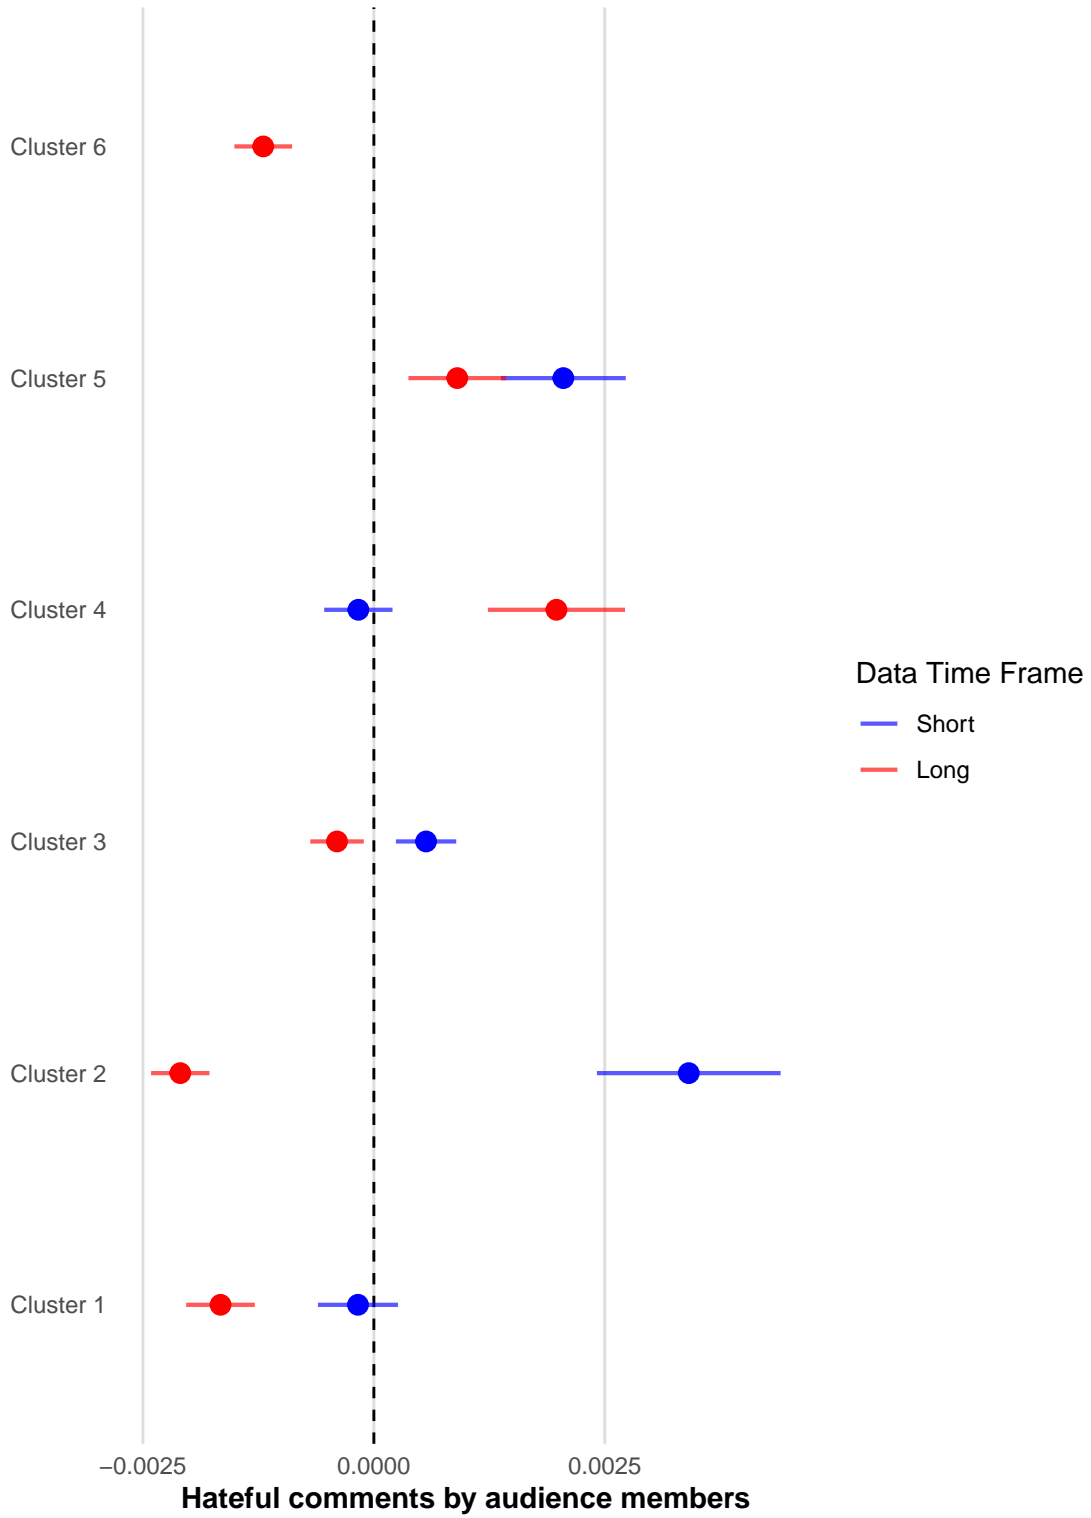

*Hateful non-audience outdegree*

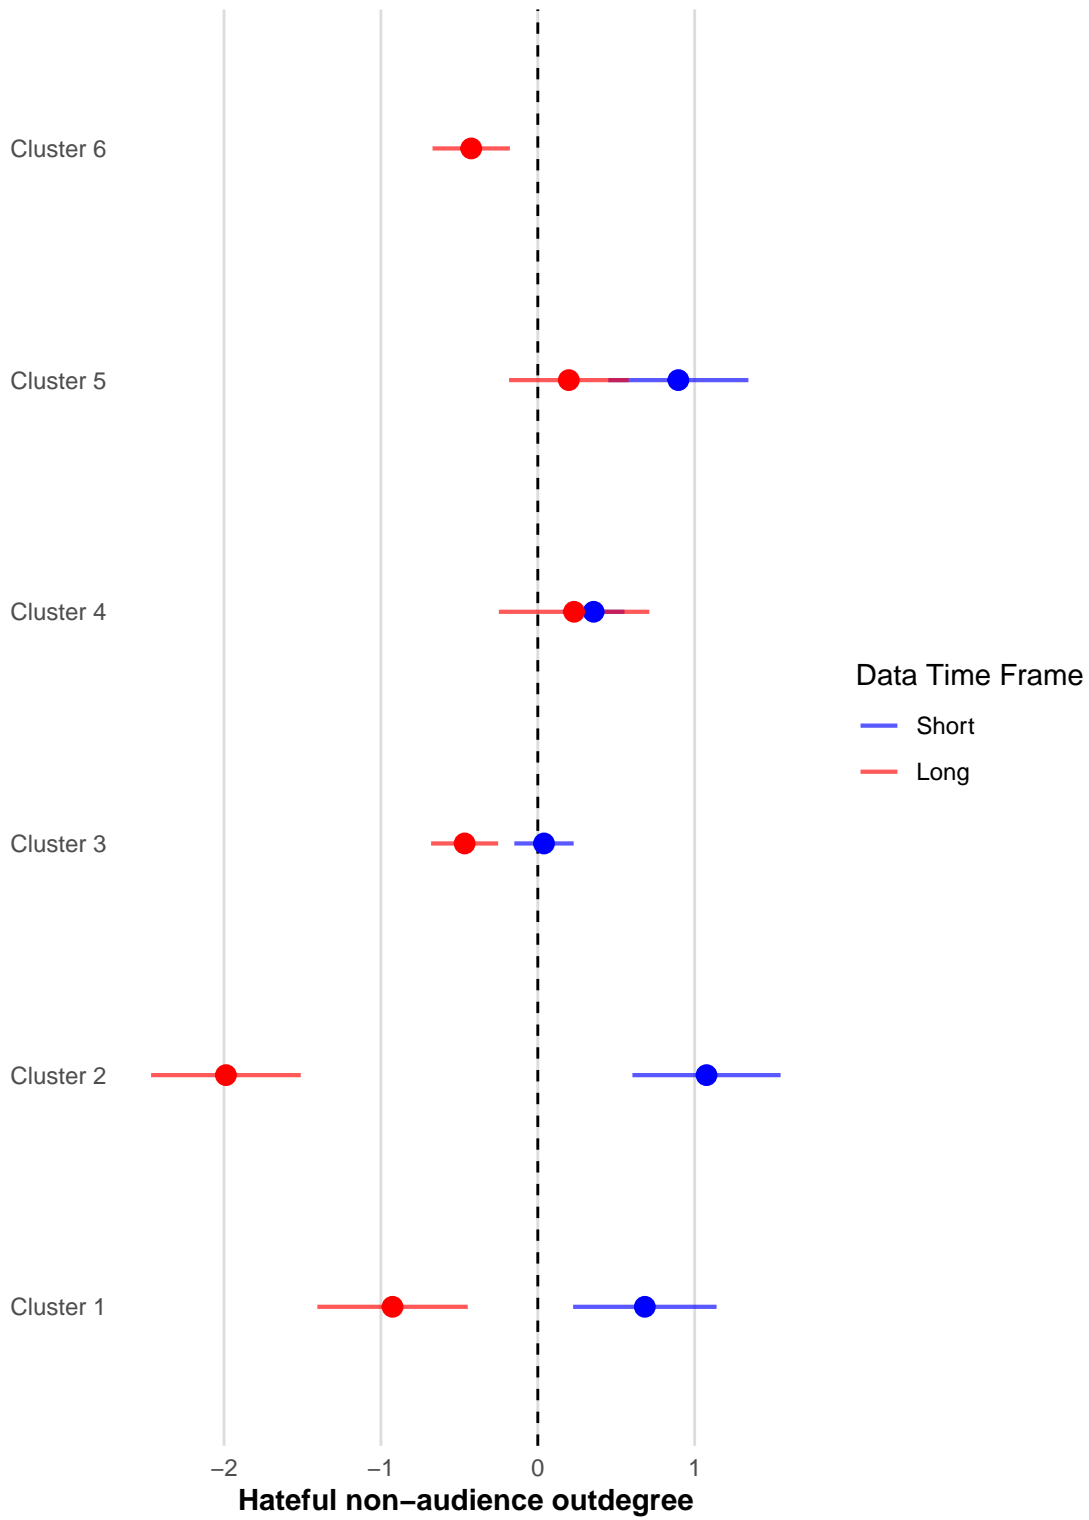

**Robustness: Dynamic differences-in-differences (Callaway and Sant'Anna 2021) for short time frame with no sampled control groups**

Views on hateful content

Average effect by length of exposure (Callaway and Sant'Anna)

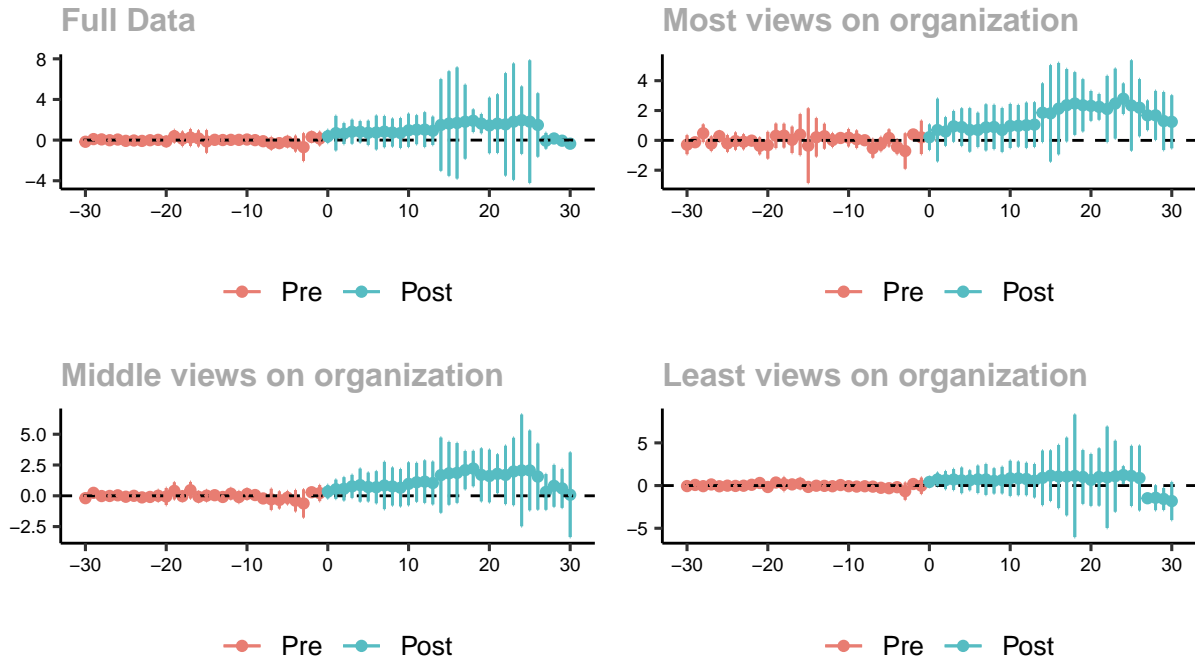

Long timeframe with sampled control groups

| sample | outcome                  | event.time | estimate   | std.error | conf.low   | conf.high |
|--------|--------------------------|------------|------------|-----------|------------|-----------|
| Full   | Views on hateful content | -30        | -0.1640932 | 0.0901646 | -0.4217024 | 0.0935160 |
| Full   | Views on hateful content | -29        | 0.0989312  | 0.0302151 | 0.0126037  | 0.1852587 |
| Full   | Views on hateful content | -28        | 0.0695868  | 0.0919996 | -0.1932652 | 0.3324388 |
| Full   | Views on hateful content | -27        | -0.0109624 | 0.0711998 | -0.2143875 | 0.1924626 |
| Full   | Views on hateful content | -26        | 0.0557531  | 0.1104261 | -0.2597453 | 0.3712515 |
| Full   | Views on hateful content | -25        | -0.0742849 | 0.0912056 | -0.3348685 | 0.1862987 |
| Full   | Views on hateful content | -24        | -0.0404187 | 0.0880951 | -0.2921152 | 0.2112778 |
| Full   | Views on hateful content | -23        | -0.0796664 | 0.0427098 | -0.2016925 | 0.0423597 |
| Full   | Views on hateful content | -22        | -0.0118867 | 0.0365097 | -0.1161985 | 0.0924252 |
| Full   | Views on hateful content | -21        | 0.0236875  | 0.1360391 | -0.3649897 | 0.4123648 |
| Full   | Views on hateful content | -20        | -0.1301127 | 0.1646941 | -0.6006601 | 0.3404346 |
| Full   | Views on hateful content | -19        | 0.3831354  | 0.2147620 | -0.2304611 | 0.9967320 |
| Full   | Views on hateful content | -18        | 0.1285521  | 0.2480018 | -0.5800137 | 0.8371179 |
| Full   | Views on hateful content | -17        | 0.2526431  | 0.2875149 | -0.5688156 | 1.0741017 |
| Full   | Views on hateful content | -16        | 0.1660627  | 0.2733162 | -0.6148288 | 0.9469542 |

|      |                          |     |            |           |            |           |
|------|--------------------------|-----|------------|-----------|------------|-----------|
| Full | Views on hateful content | -15 | -0.1313075 | 0.3866289 | -1.2359448 | 0.9733298 |
| Full | Views on hateful content | -14 | 0.0272486  | 0.1217547 | -0.3206168 | 0.3751139 |
| Full | Views on hateful content | -13 | 0.0081647  | 0.0737656 | -0.2025910 | 0.2189203 |
| Full | Views on hateful content | -12 | 0.0257712  | 0.1128795 | -0.2967368 | 0.3482792 |
| Full | Views on hateful content | -11 | 0.0235002  | 0.1118199 | -0.2959803 | 0.3429808 |
| Full | Views on hateful content | -10 | 0.0574760  | 0.1203258 | -0.2863068 | 0.4012589 |
| Full | Views on hateful content | -9  | -0.0023155 | 0.0372457 | -0.1087302 | 0.1040991 |
| Full | Views on hateful content | -8  | -0.1105797 | 0.0808400 | -0.3415477 | 0.1203884 |
| Full | Views on hateful content | -7  | -0.3197107 | 0.2131626 | -0.9287375 | 0.2893161 |
| Full | Views on hateful content | -6  | -0.2973333 | 0.1587193 | -0.7508101 | 0.1561435 |
| Full | Views on hateful content | -5  | -0.1505173 | 0.1878334 | -0.6871760 | 0.3861414 |
| Full | Views on hateful content | -4  | -0.3429218 | 0.2698623 | -1.1139452 | 0.4281015 |
| Full | Views on hateful content | -3  | -0.6919654 | 0.4745514 | -2.0478059 | 0.6638752 |
| Full | Views on hateful content | -2  | 0.3114085  | 0.1735263 | -0.1843734 | 0.8071904 |
| Full | Views on hateful content | -1  | 0.1516242  | 0.2342888 | -0.5177622 | 0.8210105 |
| Full | Views on hateful content | 0   | 0.3706243  | 0.2219720 | -0.2635719 | 1.0048205 |
| Full | Views on hateful content | 1   | 0.6868816  | 0.5929713 | -1.0072963 | 2.3810595 |
| Full | Views on hateful content | 2   | 0.6450347  | 0.3593706 | -0.3817229 | 1.6717924 |
| Full | Views on hateful content | 3   | 0.8289314  | 0.4113283 | -0.3462744 | 2.0041372 |
| Full | Views on hateful content | 4   | 0.8197029  | 0.3662905 | -0.2268256 | 1.8662314 |
| Full | Views on hateful content | 5   | 0.7167114  | 0.4155501 | -0.4705565 | 1.9039794 |
| Full | Views on hateful content | 6   | 0.7473501  | 0.5802452 | -0.9104681 | 2.4051684 |
| Full | Views on hateful content | 7   | 0.8377900  | 0.5343033 | -0.6887676 | 2.3643476 |
| Full | Views on hateful content | 8   | 0.7430487  | 0.4778586 | -0.6222409 | 2.1083384 |
| Full | Views on hateful content | 9   | 0.6973852  | 0.5112950 | -0.7634356 | 2.1582060 |
| Full | Views on hateful content | 10  | 0.9661469  | 0.5686388 | -0.6585108 | 2.5908046 |
| Full | Views on hateful content | 11  | 1.0204603  | 0.4963976 | -0.3977970 | 2.4387176 |
| Full | Views on hateful content | 12  | 1.0345871  | 0.5952879 | -0.6662097 | 2.7353840 |
| Full | Views on hateful content | 13  | 0.9166666  | 0.4856505 | -0.4708851 | 2.3042183 |
| Full | Views on hateful content | 14  | 1.4916457  | 1.5753577 | -3.0093081 | 5.9925995 |
| Full | Views on hateful content | 15  | 1.6304867  | 1.7976147 | -3.5054774 | 6.7664508 |
| Full | Views on hateful content | 16  | 1.6863297  | 1.9104139 | -3.7719127 | 7.1445722 |
| Full | Views on hateful content | 17  | 1.8113209  | 1.2706488 | -1.8190491 | 5.4416909 |
| Full | Views on hateful content | 18  | 1.9057874  | 0.3864553 | 0.8016462  | 3.0099286 |
| Full | Views on hateful content | 19  | 1.6267748  | 0.3294232 | 0.6855799  | 2.5679697 |
| Full | Views on hateful content | 20  | 1.4418071  | 0.9538297 | -1.2833793 | 4.1669935 |
| Full | Views on hateful content | 21  | 1.6222667  | 1.0059093 | -1.2517163 | 4.4962498 |
| Full | Views on hateful content | 22  | 1.5488358  | 1.7589691 | -3.4767140 | 6.5743856 |
| Full | Views on hateful content | 23  | 1.8149038  | 1.9991088 | -3.8967491 | 7.5265566 |
| Full | Views on hateful content | 24  | 1.9622640  | 1.1565957 | -1.3422449 | 5.2667729 |
| Full | Views on hateful content | 25  | 1.8164144  | 2.1081579 | -4.2068025 | 7.8396312 |

|      |                          |    |            |           |            |            |
|------|--------------------------|----|------------|-----------|------------|------------|
| Full | Views on hateful content | 26 | 1.4893808  | 1.0892444 | -1.6226987 | 4.6014602  |
| Full | Views on hateful content | 27 | -0.0623142 | 0.2704737 | -0.8350845 | 0.7104561  |
| Full | Views on hateful content | 28 | 0.1590992  | 0.1157298 | -0.1715524 | 0.4897509  |
| Full | Views on hateful content | 29 | -0.0575788 | 0.0586357 | -0.2251067 | 0.1099492  |
| Full | Views on hateful content | 30 | -0.3549450 | 0.0093802 | -0.3817453 | -0.3281448 |

| sample | outcome                  | event.time | estimate   | std.error | conf.low   | conf.high |
|--------|--------------------------|------------|------------|-----------|------------|-----------|
| Most   | Views on hateful content | -30        | -0.2887458 | 0.2821952 | -0.9213646 | 0.3438729 |
| Most   | Views on hateful content | -29        | -0.1260209 | 0.0571887 | -0.2542253 | 0.0021834 |
| Most   | Views on hateful content | -28        | 0.4774194  | 0.2624155 | -0.1108576 | 1.0656964 |
| Most   | Views on hateful content | -27        | -0.2201966 | 0.2160858 | -0.7046129 | 0.2642197 |
| Most   | Views on hateful content | -26        | 0.2814249  | 0.1473578 | -0.0489185 | 0.6117683 |
| Most   | Views on hateful content | -25        | -0.2061742 | 0.2471883 | -0.7603155 | 0.3479670 |
| Most   | Views on hateful content | -24        | -0.0492205 | 0.2556640 | -0.6223623 | 0.5239212 |
| Most   | Views on hateful content | -23        | -0.0933115 | 0.2226494 | -0.5924419 | 0.4058189 |
| Most   | Views on hateful content | -22        | -0.0188587 | 0.1276814 | -0.3050919 | 0.2673745 |
| Most   | Views on hateful content | -21        | -0.3674938 | 0.2513771 | -0.9310253 | 0.1960377 |
| Most   | Views on hateful content | -20        | -0.3238845 | 0.3986326 | -1.2175301 | 0.5697611 |
| Most   | Views on hateful content | -19        | 0.3048566  | 0.3642637 | -0.5117415 | 1.1214548 |
| Most   | Views on hateful content | -18        | 0.3173440  | 0.3543897 | -0.4771187 | 1.1118066 |
| Most   | Views on hateful content | -17        | 0.0367979  | 0.3930374 | -0.8443044 | 0.9179003 |
| Most   | Views on hateful content | -16        | 0.3861146  | 0.6115286 | -0.9847964 | 1.7570256 |
| Most   | Views on hateful content | -15        | -0.3525587 | 1.1130385 | -2.8477432 | 2.1426257 |
| Most   | Views on hateful content | -14        | 0.2066715  | 0.5715356 | -1.0745840 | 1.4879271 |
| Most   | Views on hateful content | -13        | 0.2802958  | 0.3698373 | -0.5487969 | 1.1093886 |
| Most   | Views on hateful content | -12        | 0.0204814  | 0.2050061 | -0.4390966 | 0.4800594 |
| Most   | Views on hateful content | -11        | 0.1597965  | 0.1178397 | -0.1043738 | 0.4239668 |
| Most   | Views on hateful content | -10        | 0.1792622  | 0.2578538 | -0.3987886 | 0.7573130 |
| Most   | Views on hateful content | -9         | 0.0770243  | 0.2600869 | -0.5060326 | 0.6600812 |
| Most   | Views on hateful content | -8         | 0.0082354  | 0.1104632 | -0.2393986 | 0.2558693 |
| Most   | Views on hateful content | -7         | -0.5306694 | 0.2807259 | -1.1599944 | 0.0986556 |
| Most   | Views on hateful content | -6         | -0.2451021 | 0.2127752 | -0.7220968 | 0.2318927 |
| Most   | Views on hateful content | -5         | 0.1600524  | 0.2554641 | -0.4126413 | 0.7327461 |
| Most   | Views on hateful content | -4         | -0.4301260 | 0.2188764 | -0.9207980 | 0.0605461 |
| Most   | Views on hateful content | -3         | -0.7138847 | 0.5272533 | -1.8958693 | 0.4680998 |
| Most   | Views on hateful content | -2         | 0.3959615  | 0.1213760 | 0.1238634  | 0.6680595 |
| Most   | Views on hateful content | -1         | 0.1998550  | 0.4968988 | -0.9140813 | 1.3137914 |
| Most   | Views on hateful content | 0          | 0.2135940  | 0.3771391 | -0.6318679 | 1.0590558 |
| Most   | Views on hateful content | 1          | 0.6943254  | 0.9345646 | -1.4007603 | 2.7894110 |
| Most   | Views on hateful content | 2          | 0.5969742  | 0.4241006 | -0.3537648 | 1.5477132 |
| Most   | Views on hateful content | 3          | 0.9429602  | 0.4583226 | -0.0844971 | 1.9704176 |

|      |                          |    |           |           |            |           |
|------|--------------------------|----|-----------|-----------|------------|-----------|
| Most | Views on hateful content | 4  | 0.8897469 | 0.5585065 | -0.3623003 | 2.1417940 |
| Most | Views on hateful content | 5  | 0.7005497 | 0.6474538 | -0.7508975 | 2.1519970 |
| Most | Views on hateful content | 6  | 0.7025373 | 0.5110877 | -0.4432076 | 1.8482822 |
| Most | Views on hateful content | 7  | 0.8703990 | 0.6869135 | -0.6695079 | 2.4103060 |
| Most | Views on hateful content | 8  | 0.8986793 | 0.6590285 | -0.5787157 | 2.3760744 |
| Most | Views on hateful content | 9  | 0.6978896 | 0.6534213 | -0.7669355 | 2.1627147 |
| Most | Views on hateful content | 10 | 0.9647652 | 0.6570616 | -0.5082205 | 2.4377510 |
| Most | Views on hateful content | 11 | 0.9768326 | 0.6204159 | -0.4140015 | 2.3676668 |
| Most | Views on hateful content | 12 | 1.0147375 | 0.6732318 | -0.4944982 | 2.5239732 |
| Most | Views on hateful content | 13 | 1.0568102 | 0.6640172 | -0.4317684 | 2.5453888 |
| Most | Views on hateful content | 14 | 1.8543599 | 0.8729554 | -0.1026118 | 3.8113315 |
| Most | Views on hateful content | 15 | 1.8097666 | 1.4371408 | -1.4119830 | 5.0315162 |
| Most | Views on hateful content | 16 | 2.1290395 | 1.3652451 | -0.9315360 | 5.1896149 |
| Most | Views on hateful content | 17 | 2.3572173 | 1.0799562 | -0.0638040 | 4.7782386 |
| Most | Views on hateful content | 18 | 2.4708155 | 0.9353253 | 0.3740245  | 4.5676066 |
| Most | Views on hateful content | 19 | 2.3515525 | 0.7781943 | 0.6070142  | 4.0960908 |
| Most | Views on hateful content | 20 | 2.3133407 | 0.4439566 | 1.3180889  | 3.3085926 |
| Most | Views on hateful content | 21 | 2.2472957 | 0.3845129 | 1.3853035  | 3.1092879 |
| Most | Views on hateful content | 22 | 2.1046587 | 0.9874047 | -0.1088827 | 4.3182002 |
| Most | Views on hateful content | 23 | 2.4660048 | 1.0425736 | 0.1287869  | 4.8032226 |
| Most | Views on hateful content | 24 | 2.7915376 | 0.4537624 | 1.7743033  | 3.8087718 |
| Most | Views on hateful content | 25 | 2.3398849 | 1.3462547 | -0.6781183 | 5.3578881 |
| Most | Views on hateful content | 26 | 2.1901123 | 0.8523732 | 0.2792814  | 4.1009432 |
| Most | Views on hateful content | 27 | 1.6784887 | 0.4406810 | 0.6905799  | 2.6663974 |
| Most | Views on hateful content | 28 | 1.6758948 | 0.7305285 | 0.0382125  | 3.3135771 |
| Most | Views on hateful content | 29 | 1.2957824 | 0.8673807 | -0.6486919 | 3.2402568 |
| Most | Views on hateful content | 30 | 1.2442937 | 0.7900104 | -0.5267337 | 3.0153210 |

| sample | outcome                  | event.time | estimate   | std.error | conf.low   | conf.high  |
|--------|--------------------------|------------|------------|-----------|------------|------------|
| Middle | Views on hateful content | -30        | -0.1933987 | 0.1086583 | -0.4712573 | 0.0844599  |
| Middle | Views on hateful content | -29        | 0.2391305  | 0.0426878 | 0.1299702  | 0.3482908  |
| Middle | Views on hateful content | -28        | -0.0218228 | 0.1381103 | -0.3749955 | 0.3313500  |
| Middle | Views on hateful content | -27        | -0.0120644 | 0.1105031 | -0.2946406 | 0.2705117  |
| Middle | Views on hateful content | -26        | 0.0391182  | 0.0653614 | -0.1280226 | 0.2062590  |
| Middle | Views on hateful content | -25        | -0.0764202 | 0.1251521 | -0.3964565 | 0.2436161  |
| Middle | Views on hateful content | -24        | -0.0024988 | 0.0975379 | -0.2519205 | 0.2469229  |
| Middle | Views on hateful content | -23        | -0.1290395 | 0.0663058 | -0.2985954 | 0.0405163  |
| Middle | Views on hateful content | -22        | -0.0919419 | 0.0325115 | -0.1750795 | -0.0088043 |
| Middle | Views on hateful content | -21        | 0.0046431  | 0.1821611 | -0.4611753 | 0.4704616  |
| Middle | Views on hateful content | -20        | -0.0586918 | 0.2690524 | -0.7467068 | 0.6293232  |
| Middle | Views on hateful content | -19        | 0.4003271  | 0.2694179 | -0.2886224 | 1.0892766  |

|        |                          |     |            |           |            |            |
|--------|--------------------------|-----|------------|-----------|------------|------------|
| Middle | Views on hateful content | -18 | -0.0327679 | 0.1532567 | -0.4246725 | 0.3591367  |
| Middle | Views on hateful content | -17 | 0.4561173  | 0.2619312 | -0.2136874 | 1.1259219  |
| Middle | Views on hateful content | -16 | -0.0846713 | 0.1651462 | -0.5069794 | 0.3376369  |
| Middle | Views on hateful content | -15 | 0.0104997  | 0.1746367 | -0.4360773 | 0.4570768  |
| Middle | Views on hateful content | -14 | 0.0467867  | 0.1000826 | -0.2091423 | 0.3027157  |
| Middle | Views on hateful content | -13 | -0.0959929 | 0.0727588 | -0.2820502 | 0.0900644  |
| Middle | Views on hateful content | -12 | 0.1721922  | 0.1755274 | -0.2766628 | 0.6210471  |
| Middle | Views on hateful content | -11 | -0.1022753 | 0.1833370 | -0.5711008 | 0.3665501  |
| Middle | Views on hateful content | -10 | 0.1446152  | 0.1696877 | -0.2893065 | 0.5785370  |
| Middle | Views on hateful content | -9  | 0.0612869  | 0.0842428 | -0.1541369 | 0.2767106  |
| Middle | Views on hateful content | -8  | -0.2165999 | 0.0438452 | -0.3287200 | -0.1044798 |
| Middle | Views on hateful content | -7  | -0.2887625 | 0.3337837 | -1.1423070 | 0.5647820  |
| Middle | Views on hateful content | -6  | -0.3377171 | 0.2688708 | -1.0252677 | 0.3498334  |
| Middle | Views on hateful content | -5  | -0.1583769 | 0.2078927 | -0.6899957 | 0.3732418  |
| Middle | Views on hateful content | -4  | -0.3973291 | 0.3368288 | -1.2586604 | 0.4640022  |
| Middle | Views on hateful content | -3  | -0.6209583 | 0.4432983 | -1.7545509 | 0.5126344  |
| Middle | Views on hateful content | -2  | 0.2885289  | 0.1180794 | -0.0134212 | 0.5904790  |
| Middle | Views on hateful content | -1  | 0.2171409  | 0.2532719 | -0.4305205 | 0.8648023  |
| Middle | Views on hateful content | 0   | 0.3362219  | 0.2134703 | -0.2096598 | 0.8821035  |
| Middle | Views on hateful content | 1   | 0.5313967  | 0.3037744 | -0.2454085 | 1.3082019  |
| Middle | Views on hateful content | 2   | 0.5653021  | 0.3673883 | -0.3741753 | 1.5047795  |
| Middle | Views on hateful content | 3   | 0.7670909  | 0.3642675 | -0.1644061 | 1.6985878  |
| Middle | Views on hateful content | 4   | 0.8674345  | 0.5214242 | -0.4659402 | 2.2008091  |
| Middle | Views on hateful content | 5   | 0.7119434  | 0.4554239 | -0.4526566 | 1.8765434  |
| Middle | Views on hateful content | 6   | 0.6922750  | 0.5062097 | -0.6021933 | 1.9867434  |
| Middle | Views on hateful content | 7   | 0.8365299  | 0.7492993 | -1.0795618 | 2.7526216  |
| Middle | Views on hateful content | 8   | 0.7551769  | 0.5986073 | -0.7755685 | 2.2859224  |
| Middle | Views on hateful content | 9   | 0.6552808  | 0.5897674 | -0.8528597 | 2.1634212  |
| Middle | Views on hateful content | 10  | 0.9698659  | 0.6776473 | -0.7629990 | 2.7027309  |
| Middle | Views on hateful content | 11  | 1.0973839  | 0.6140447 | -0.4728377 | 2.6676055  |
| Middle | Views on hateful content | 12  | 1.1497436  | 0.6712258 | -0.5667004 | 2.8661876  |
| Middle | Views on hateful content | 13  | 1.0394235  | 0.6771592 | -0.6921931 | 2.7710402  |
| Middle | Views on hateful content | 14  | 1.6784957  | 1.1908106 | -1.3666192 | 4.7236106  |
| Middle | Views on hateful content | 15  | 1.8255523  | 0.9960442 | -0.7215102 | 4.3726149  |
| Middle | Views on hateful content | 16  | 1.8600650  | 0.9478916 | -0.5638627 | 4.2839928  |
| Middle | Views on hateful content | 17  | 2.0830562  | 0.6058574 | 0.5337708  | 3.6323416  |
| Middle | Views on hateful content | 18  | 2.2135650  | 0.5600916 | 0.7813109  | 3.6458190  |
| Middle | Views on hateful content | 19  | 1.6992455  | 0.8381981 | -0.4441764 | 3.8426675  |
| Middle | Views on hateful content | 20  | 1.6073386  | 0.8326220 | -0.5218243 | 3.7365015  |
| Middle | Views on hateful content | 21  | 1.7879557  | 0.6151554 | 0.2148939  | 3.3610176  |
| Middle | Views on hateful content | 22  | 1.6946039  | 0.9249197 | -0.6705805 | 4.0597882  |

|        |                          |    |           |           |            |           |
|--------|--------------------------|----|-----------|-----------|------------|-----------|
| Middle | Views on hateful content | 23 | 1.9759208 | 1.0682899 | -0.7558868 | 4.7077284 |
| Middle | Views on hateful content | 24 | 2.0608637 | 1.7717486 | -2.4698132 | 6.5915406 |
| Middle | Views on hateful content | 25 | 2.0597410 | 1.2643091 | -1.1733227 | 5.2928046 |
| Middle | Views on hateful content | 26 | 1.5596148 | 1.0464958 | -1.1164613 | 4.2356909 |
| Middle | Views on hateful content | 27 | 0.3158103 | 0.5648476 | -1.1286057 | 1.7602263 |
| Middle | Views on hateful content | 28 | 0.8108127 | 0.6624342 | -0.8831497 | 2.5047750 |
| Middle | Views on hateful content | 29 | 0.6006871 | 0.6148412 | -0.9715712 | 2.1729455 |
| Middle | Views on hateful content | 30 | 0.0815616 | 1.3424856 | -3.3514133 | 3.5145364 |

| sample | outcome                  | event.time | estimate   | std.error | conf.low   | conf.high |
|--------|--------------------------|------------|------------|-----------|------------|-----------|
| Least  | Views on hateful content | -30        | -0.0603217 | 0.0679958 | -0.2113271 | 0.0906837 |
| Least  | Views on hateful content | -29        | 0.0751493  | 0.1187863 | -0.1886517 | 0.3389503 |
| Least  | Views on hateful content | -28        | -0.0695978 | 0.1558930 | -0.4158055 | 0.2766099 |
| Least  | Views on hateful content | -27        | 0.1304497  | 0.1937206 | -0.2997657 | 0.5606650 |
| Least  | Views on hateful content | -26        | -0.0816879 | 0.2112815 | -0.5509027 | 0.3875269 |
| Least  | Views on hateful content | -25        | -0.0085557 | 0.1109004 | -0.2548438 | 0.2377324 |
| Least  | Views on hateful content | -24        | -0.0397465 | 0.1196669 | -0.3055033 | 0.2260102 |
| Least  | Views on hateful content | -23        | -0.0200935 | 0.0638808 | -0.1619602 | 0.1217733 |
| Least  | Views on hateful content | -22        | 0.0925241  | 0.0536926 | -0.0267167 | 0.2117649 |
| Least  | Views on hateful content | -21        | 0.3030380  | 0.1945842 | -0.1290953 | 0.7351713 |
| Least  | Views on hateful content | -20        | -0.1672153 | 0.0883837 | -0.3634982 | 0.0290676 |
| Least  | Views on hateful content | -19        | 0.3545159  | 0.0759709 | 0.1857993  | 0.5232324 |
| Least  | Views on hateful content | -18        | 0.1724139  | 0.3634424 | -0.6347202 | 0.9795481 |
| Least  | Views on hateful content | -17        | 0.1375400  | 0.2147474 | -0.3393717 | 0.6144517 |
| Least  | Views on hateful content | -16        | 0.2349888  | 0.2835006 | -0.3946103 | 0.8645879 |
| Least  | Views on hateful content | -15        | -0.1574628 | 0.2044585 | -0.6115250 | 0.2965995 |
| Least  | Views on hateful content | -14        | -0.0177719 | 0.1042118 | -0.2492060 | 0.2136621 |
| Least  | Views on hateful content | -13        | -0.0338537 | 0.1302394 | -0.3230897 | 0.2553824 |
| Least  | Views on hateful content | -12        | -0.0795778 | 0.1811876 | -0.4819600 | 0.3228043 |
| Least  | Views on hateful content | -11        | 0.0616509  | 0.1233325 | -0.2122463 | 0.3355481 |
| Least  | Views on hateful content | -10        | -0.0733056 | 0.1409799 | -0.3863942 | 0.2397829 |
| Least  | Views on hateful content | -9         | -0.1163850 | 0.1137838 | -0.3690766 | 0.1363066 |
| Least  | Views on hateful content | -8         | -0.0795468 | 0.1570117 | -0.4282390 | 0.2691454 |
| Least  | Views on hateful content | -7         | -0.1269226 | 0.0887930 | -0.3241146 | 0.0702693 |
| Least  | Views on hateful content | -6         | -0.2599361 | 0.1803895 | -0.6605459 | 0.1406736 |
| Least  | Views on hateful content | -5         | -0.3105912 | 0.1800395 | -0.7104236 | 0.0892412 |
| Least  | Views on hateful content | -4         | -0.1872057 | 0.2387077 | -0.7173286 | 0.3429172 |
| Least  | Views on hateful content | -3         | -0.6580058 | 0.4517351 | -1.6612209 | 0.3452092 |
| Least  | Views on hateful content | -2         | 0.1821385  | 0.1287620 | -0.1038165 | 0.4680935 |
| Least  | Views on hateful content | -1         | -0.0189873 | 0.4244494 | -0.9616062 | 0.9236315 |
| Least  | Views on hateful content | 0          | 0.4253834  | 0.2632489 | -0.1592407 | 1.0100075 |



|       |                          |    |            |           |            |            |
|-------|--------------------------|----|------------|-----------|------------|------------|
| Least | Views on hateful content | 1  | 0.7103481  | 0.3578469 | -0.0843597 | 1.5050558  |
| Least | Views on hateful content | 2  | 0.6327921  | 0.4720808 | -0.4156068 | 1.6811909  |
| Least | Views on hateful content | 3  | 0.7128442  | 0.5501113 | -0.5088452 | 1.9345335  |
| Least | Views on hateful content | 4  | 0.6096476  | 0.6718269 | -0.8823480 | 2.1016432  |
| Least | Views on hateful content | 5  | 0.6180340  | 0.5220922 | -0.5414304 | 1.7774984  |
| Least | Views on hateful content | 6  | 0.7312036  | 0.7196078 | -0.8669042 | 2.3293113  |
| Least | Views on hateful content | 7  | 0.7180407  | 0.8103495 | -1.0815866 | 2.5176680  |
| Least | Views on hateful content | 8  | 0.5470516  | 0.6627672 | -0.9248244 | 2.0189275  |
| Least | Views on hateful content | 9  | 0.6396120  | 0.6976490 | -0.9097296 | 2.1889536  |
| Least | Views on hateful content | 10 | 0.8481398  | 0.9233593 | -1.2024599 | 2.8987395  |
| Least | Views on hateful content | 11 | 0.8404267  | 0.8834491 | -1.1215404 | 2.8023938  |
| Least | Views on hateful content | 12 | 0.7694750  | 0.8511357 | -1.1207303 | 2.6596803  |
| Least | Views on hateful content | 13 | 0.5716186  | 0.8791018 | -1.3806939 | 2.5239311  |
| Least | Views on hateful content | 14 | 0.9008246  | 1.4335640 | -2.2828397 | 4.0844889  |
| Least | Views on hateful content | 15 | 1.1597806  | 1.3257025 | -1.7843444 | 4.1039056  |
| Least | Views on hateful content | 16 | 1.0605395  | 1.6624585 | -2.6314547 | 4.7525336  |
| Least | Views on hateful content | 17 | 1.0621915  | 2.0445961 | -3.4784553 | 5.6028382  |
| Least | Views on hateful content | 18 | 1.1390592  | 3.2278006 | -6.0292523 | 8.3073708  |
| Least | Views on hateful content | 19 | 1.0098024  | 1.4145373 | -2.1316073 | 4.1512120  |
| Least | Views on hateful content | 20 | 0.6660419  | 1.3647332 | -2.3647627 | 3.6968465  |
| Least | Views on hateful content | 21 | 1.0045093  | 1.5066557 | -2.3414774 | 4.3504959  |
| Least | Views on hateful content | 22 | 0.9689239  | 2.6691318 | -4.9586939 | 6.8965418  |
| Least | Views on hateful content | 23 | 1.0969598  | 1.8664182 | -3.0479887 | 5.2419084  |
| Least | Views on hateful content | 24 | 1.2360449  | 0.4584531 | 0.2179104  | 2.2541793  |
| Least | Views on hateful content | 25 | 1.1314707  | 1.5816016 | -2.3809561 | 4.6438975  |
| Least | Views on hateful content | 26 | 0.8853821  | 1.7026208 | -2.8958046 | 4.6665688  |
| Least | Views on hateful content | 27 | -1.4850305 | 0.0901846 | -1.6853128 | -1.2847483 |
| Least | Views on hateful content | 28 | -1.4292678 | 0.6514733 | -2.8760622 | 0.0175266  |
| Least | Views on hateful content | 29 | -1.5645742 | 0.5782609 | -2.8487782 | -0.2803702 |
| Least | Views on hateful content | 30 | -1.8161823 | 0.9998895 | -4.0367408 | 0.4043761  |

## Views on hateful content/total views

Average effect by length of exposure (Callaway and Sant'Anna)

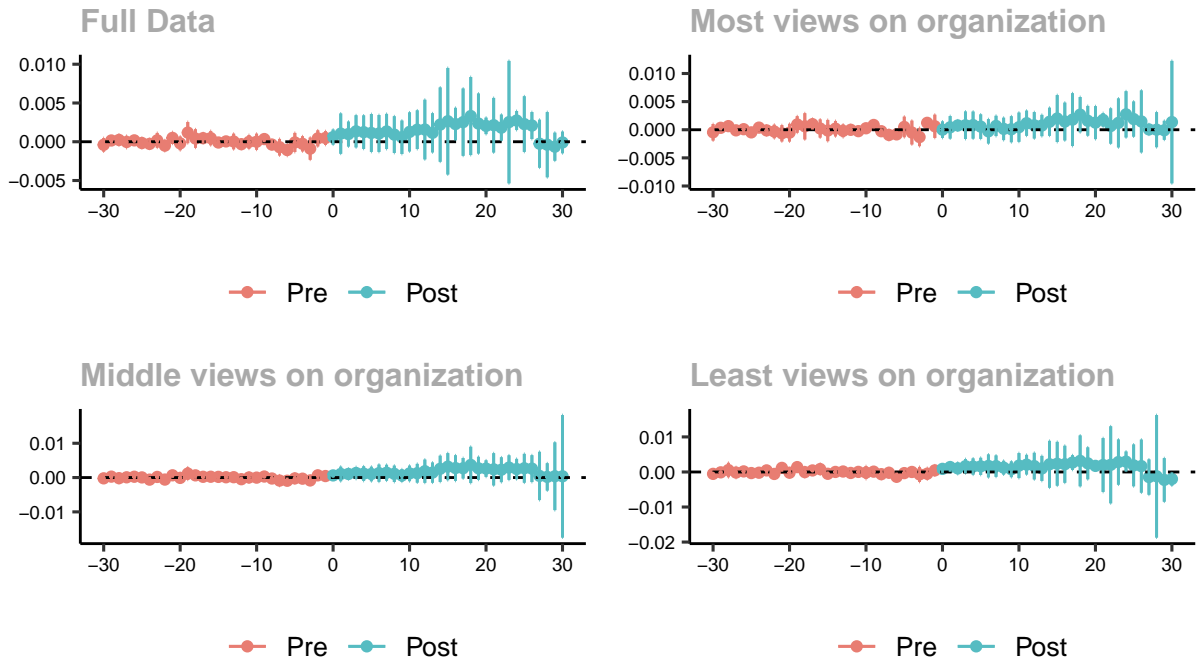

Long timeframe with sampled control groups

| sample | outcome                              | event.time | estimate   | std.error | conf.low   | conf.high |
|--------|--------------------------------------|------------|------------|-----------|------------|-----------|
| Full   | Views on hateful content/total views | -30        | -0.0003933 | 0.0003464 | -0.0012657 | 0.0004791 |
| Full   | Views on hateful content/total views | -29        | 0.0001647  | 0.0001569 | -0.0002305 | 0.0005599 |
| Full   | Views on hateful content/total views | -28        | 0.0002329  | 0.0002784 | -0.0004682 | 0.0009339 |
| Full   | Views on hateful content/total views | -27        | -0.0000263 | 0.0003113 | -0.0008102 | 0.0007575 |
| Full   | Views on hateful content/total views | -26        | 0.0001784  | 0.0001188 | -0.0001208 | 0.0004777 |
| Full   | Views on hateful content/total views | -25        | -0.0001617 | 0.0002627 | -0.0008233 | 0.0004999 |
| Full   | Views on hateful content/total views | -24        | -0.0002759 | 0.0002486 | -0.0009020 | 0.0003502 |
| Full   | Views on hateful content/total views | -23        | 0.0001831  | 0.0003783 | -0.0007695 | 0.0011358 |
| Full   | Views on hateful content/total views | -22        | -0.0005013 | 0.0002804 | -0.0012074 | 0.0002048 |
| Full   | Views on hateful content/total views | -21        | 0.0004951  | 0.0002992 | -0.0002584 | 0.0012487 |
| Full   | Views on hateful content/total views | -20        | -0.0002088 | 0.0003509 | -0.0010925 | 0.0006748 |
| Full   | Views on hateful content/total views | -19        | 0.0011803  | 0.0005419 | -0.0001842 | 0.0025448 |
| Full   | Views on hateful content/total views | -18        | 0.0004170  | 0.0004722 | -0.0007720 | 0.0016060 |
| Full   | Views on hateful content/total views | -17        | 0.0004649  | 0.0002561 | -0.0001801 | 0.0011098 |
| Full   | Views on hateful content/total views | -16        | 0.0004676  | 0.0003661 | -0.0004542 | 0.0013894 |
| Full   | Views on hateful content/total views | -15        | -0.0000983 | 0.0001718 | -0.0005308 | 0.0003343 |
| Full   | Views on hateful content/total views | -14        | 0.0000454  | 0.0001788 | -0.0004050 | 0.0004957 |
| Full   | Views on hateful content/total views | -13        | 0.0000313  | 0.0003988 | -0.0009730 | 0.0010356 |
| Full   | Views on hateful content/total views | -12        | -0.0003143 | 0.0002404 | -0.0009196 | 0.0002910 |

|      |                                      |     |            |           |            |            |
|------|--------------------------------------|-----|------------|-----------|------------|------------|
| Full | Views on hateful content/total views | -11 | -0.0000176 | 0.0003498 | -0.0008985 | 0.0008633  |
| Full | Views on hateful content/total views | -10 | 0.0000033  | 0.0004102 | -0.0010295 | 0.0010361  |
| Full | Views on hateful content/total views | -9  | 0.0003474  | 0.0001633 | -0.0000637 | 0.0007586  |
| Full | Views on hateful content/total views | -8  | -0.0003666 | 0.0002332 | -0.0009537 | 0.0002206  |
| Full | Views on hateful content/total views | -7  | -0.0007026 | 0.0004233 | -0.0017686 | 0.0003634  |
| Full | Views on hateful content/total views | -6  | -0.0010668 | 0.0003005 | -0.0018236 | -0.0003100 |
| Full | Views on hateful content/total views | -5  | -0.0000919 | 0.0004894 | -0.0013243 | 0.0011405  |
| Full | Views on hateful content/total views | -4  | -0.0002663 | 0.0003864 | -0.0012393 | 0.0007068  |
| Full | Views on hateful content/total views | -3  | -0.0008900 | 0.0005667 | -0.0023170 | 0.0005370  |
| Full | Views on hateful content/total views | -2  | 0.0004315  | 0.0004106 | -0.0006026 | 0.0014656  |
| Full | Views on hateful content/total views | -1  | 0.0004840  | 0.0003523 | -0.0004033 | 0.0013712  |
| Full | Views on hateful content/total views | 0   | 0.0005989  | 0.0003865 | -0.0003743 | 0.0015721  |
| Full | Views on hateful content/total views | 1   | 0.0010490  | 0.0010300 | -0.0015447 | 0.0036426  |
| Full | Views on hateful content/total views | 2   | 0.0009938  | 0.0006359 | -0.0006075 | 0.0025952  |
| Full | Views on hateful content/total views | 3   | 0.0013446  | 0.0008233 | -0.0007286 | 0.0034179  |
| Full | Views on hateful content/total views | 4   | 0.0012393  | 0.0008563 | -0.0009169 | 0.0033955  |
| Full | Views on hateful content/total views | 5   | 0.0011341  | 0.0009687 | -0.0013052 | 0.0035734  |
| Full | Views on hateful content/total views | 6   | 0.0010672  | 0.0009446 | -0.0013115 | 0.0034459  |
| Full | Views on hateful content/total views | 7   | 0.0013269  | 0.0008991 | -0.0009370 | 0.0035909  |
| Full | Views on hateful content/total views | 8   | 0.0009218  | 0.0009395 | -0.0014439 | 0.0032875  |
| Full | Views on hateful content/total views | 9   | 0.0005764  | 0.0008555 | -0.0015780 | 0.0027307  |
| Full | Views on hateful content/total views | 10  | 0.0012713  | 0.0009978 | -0.0012414 | 0.0037840  |
| Full | Views on hateful content/total views | 11  | 0.0015546  | 0.0009894 | -0.0009368 | 0.0040460  |
| Full | Views on hateful content/total views | 12  | 0.0015750  | 0.0015269 | -0.0022699 | 0.0054199  |
| Full | Views on hateful content/total views | 13  | 0.0011527  | 0.0010005 | -0.0013667 | 0.0036720  |
| Full | Views on hateful content/total views | 14  | 0.0022125  | 0.0019015 | -0.0025759 | 0.0070008  |
| Full | Views on hateful content/total views | 15  | 0.0026470  | 0.0027270 | -0.0042200 | 0.0095141  |
| Full | Views on hateful content/total views | 16  | 0.0022831  | 0.0008300 | 0.0001931  | 0.0043731  |
| Full | Views on hateful content/total views | 17  | 0.0025300  | 0.0017224 | -0.0018074 | 0.0068673  |
| Full | Views on hateful content/total views | 18  | 0.0033167  | 0.0019980 | -0.0017144 | 0.0083479  |
| Full | Views on hateful content/total views | 19  | 0.0023537  | 0.0015336 | -0.0015081 | 0.0062154  |
| Full | Views on hateful content/total views | 20  | 0.0020447  | 0.0004213 | 0.0009837  | 0.0031057  |
| Full | Views on hateful content/total views | 21  | 0.0021339  | 0.0013969 | -0.0013836 | 0.0056514  |
| Full | Views on hateful content/total views | 22  | 0.0018181  | 0.0006676 | 0.0001371  | 0.0034991  |
| Full | Views on hateful content/total views | 23  | 0.0025357  | 0.0031357 | -0.0053604 | 0.0104318  |
| Full | Views on hateful content/total views | 24  | 0.0027387  | 0.0004873 | 0.0015116  | 0.0039658  |
| Full | Views on hateful content/total views | 25  | 0.0022802  | 0.0014228 | -0.0013027 | 0.0058632  |
| Full | Views on hateful content/total views | 26  | 0.0020919  | 0.0006906 | 0.0003527  | 0.0038310  |
| Full | Views on hateful content/total views | 27  | -0.0002533 | 0.0012274 | -0.0033441 | 0.0028376  |
| Full | Views on hateful content/total views | 28  | -0.0003787 | 0.0016691 | -0.0045817 | 0.0038244  |
| Full | Views on hateful content/total views | 29  | -0.0006356 | 0.0007170 | -0.0024411 | 0.0011698  |

|      |                                      |    |            |           |            |           |
|------|--------------------------------------|----|------------|-----------|------------|-----------|
| Full | Views on hateful content/total views | 30 | -0.0000896 | 0.0005524 | -0.0014806 | 0.0013014 |
|------|--------------------------------------|----|------------|-----------|------------|-----------|

| sample | outcome                              | event.time | estimate   | std.error | conf.low   | conf.high  |
|--------|--------------------------------------|------------|------------|-----------|------------|------------|
| Most   | Views on hateful content/total views | -30        | -0.0004523 | 0.0006731 | -0.0019157 | 0.0010111  |
| Most   | Views on hateful content/total views | -29        | 0.0003434  | 0.0002229 | -0.0001411 | 0.0008279  |
| Most   | Views on hateful content/total views | -28        | 0.0006454  | 0.0003265 | -0.0000644 | 0.0013552  |
| Most   | Views on hateful content/total views | -27        | -0.0001067 | 0.0002239 | -0.0005935 | 0.0003801  |
| Most   | Views on hateful content/total views | -26        | 0.0000993  | 0.0002233 | -0.0003862 | 0.0005848  |
| Most   | Views on hateful content/total views | -25        | -0.0004674 | 0.0001932 | -0.0008875 | -0.0000473 |
| Most   | Views on hateful content/total views | -24        | 0.0003761  | 0.0003085 | -0.0002945 | 0.0010467  |
| Most   | Views on hateful content/total views | -23        | -0.0001137 | 0.0003884 | -0.0009582 | 0.0007308  |
| Most   | Views on hateful content/total views | -22        | -0.0003100 | 0.0005546 | -0.0015157 | 0.0008956  |
| Most   | Views on hateful content/total views | -21        | -0.0006320 | 0.0006637 | -0.0020748 | 0.0008109  |
| Most   | Views on hateful content/total views | -20        | -0.0005131 | 0.0007215 | -0.0020817 | 0.0010554  |
| Most   | Views on hateful content/total views | -19        | 0.0009351  | 0.0006746 | -0.0005315 | 0.0024017  |
| Most   | Views on hateful content/total views | -18        | 0.0006112  | 0.0010699 | -0.0017148 | 0.0029371  |
| Most   | Views on hateful content/total views | -17        | 0.0009906  | 0.0004430 | 0.0000275  | 0.0019537  |
| Most   | Views on hateful content/total views | -16        | 0.0002208  | 0.0007395 | -0.0013868 | 0.0018285  |
| Most   | Views on hateful content/total views | -15        | -0.0001396 | 0.0008676 | -0.0020259 | 0.0017467  |
| Most   | Views on hateful content/total views | -14        | 0.0001934  | 0.0006285 | -0.0011730 | 0.0015597  |
| Most   | Views on hateful content/total views | -13        | -0.0001966 | 0.0005207 | -0.0013287 | 0.0009355  |
| Most   | Views on hateful content/total views | -12        | -0.0000121 | 0.0003886 | -0.0008569 | 0.0008327  |
| Most   | Views on hateful content/total views | -11        | -0.0002459 | 0.0002947 | -0.0008865 | 0.0003947  |
| Most   | Views on hateful content/total views | -10        | 0.0002656  | 0.0002177 | -0.0002078 | 0.0007390  |
| Most   | Views on hateful content/total views | -9         | 0.0008464  | 0.0002764 | 0.0002454  | 0.0014473  |
| Most   | Views on hateful content/total views | -8         | -0.0002636 | 0.0002386 | -0.0007823 | 0.0002550  |
| Most   | Views on hateful content/total views | -7         | -0.0009259 | 0.0004113 | -0.0018201 | -0.0000318 |
| Most   | Views on hateful content/total views | -6         | -0.0008202 | 0.0002492 | -0.0013620 | -0.0002784 |
| Most   | Views on hateful content/total views | -5         | 0.0004966  | 0.0008393 | -0.0013282 | 0.0023213  |
| Most   | Views on hateful content/total views | -4         | -0.0004976 | 0.0009720 | -0.0026108 | 0.0016155  |
| Most   | Views on hateful content/total views | -3         | -0.0012946 | 0.0007454 | -0.0029152 | 0.0003260  |
| Most   | Views on hateful content/total views | -2         | 0.0012267  | 0.0002057 | 0.0007795  | 0.0016739  |
| Most   | Views on hateful content/total views | -1         | 0.0006157  | 0.0009471 | -0.0014434 | 0.0026748  |
| Most   | Views on hateful content/total views | 0          | 0.0000106  | 0.0006740 | -0.0014546 | 0.0014759  |
| Most   | Views on hateful content/total views | 1          | 0.0004332  | 0.0009177 | -0.0015620 | 0.0024284  |
| Most   | Views on hateful content/total views | 2          | 0.0007616  | 0.0004170 | -0.0001449 | 0.0016681  |
| Most   | Views on hateful content/total views | 3          | 0.0007958  | 0.0011228 | -0.0016451 | 0.0032367  |
| Most   | Views on hateful content/total views | 4          | 0.0008287  | 0.0011041 | -0.0015716 | 0.0032290  |
| Most   | Views on hateful content/total views | 5          | 0.0005529  | 0.0009996 | -0.0016203 | 0.0027262  |
| Most   | Views on hateful content/total views | 6          | -0.0002803 | 0.0009921 | -0.0024372 | 0.0018766  |
| Most   | Views on hateful content/total views | 7          | 0.0006818  | 0.0008279 | -0.0011180 | 0.0024816  |

|      |                                      |    |            |           |            |           |
|------|--------------------------------------|----|------------|-----------|------------|-----------|
| Most | Views on hateful content/total views | 8  | 0.0001479  | 0.0009136 | -0.0018382 | 0.0021340 |
| Most | Views on hateful content/total views | 9  | 0.0000863  | 0.0010608 | -0.0022199 | 0.0023924 |
| Most | Views on hateful content/total views | 10 | 0.0004555  | 0.0011932 | -0.0021385 | 0.0030494 |
| Most | Views on hateful content/total views | 11 | 0.0011625  | 0.0010240 | -0.0010637 | 0.0033888 |
| Most | Views on hateful content/total views | 12 | 0.0007890  | 0.0010759 | -0.0015500 | 0.0031280 |
| Most | Views on hateful content/total views | 13 | 0.0007509  | 0.0008710 | -0.0011427 | 0.0026445 |
| Most | Views on hateful content/total views | 14 | 0.0014219  | 0.0011453 | -0.0010679 | 0.0039118 |
| Most | Views on hateful content/total views | 15 | 0.0019921  | 0.0019170 | -0.0021755 | 0.0061597 |
| Most | Views on hateful content/total views | 16 | 0.0014597  | 0.0015443 | -0.0018977 | 0.0048172 |
| Most | Views on hateful content/total views | 17 | 0.0017975  | 0.0021574 | -0.0028928 | 0.0064878 |
| Most | Views on hateful content/total views | 18 | 0.0026834  | 0.0014421 | -0.0004519 | 0.0058186 |
| Most | Views on hateful content/total views | 19 | 0.0015947  | 0.0012135 | -0.0010434 | 0.0042328 |
| Most | Views on hateful content/total views | 20 | 0.0012662  | 0.0013464 | -0.0016609 | 0.0041933 |
| Most | Views on hateful content/total views | 21 | 0.0017568  | 0.0005571 | 0.0005458  | 0.0029679 |
| Most | Views on hateful content/total views | 22 | 0.0006644  | 0.0014393 | -0.0024647 | 0.0037935 |
| Most | Views on hateful content/total views | 23 | 0.0012111  | 0.0019980 | -0.0031326 | 0.0055548 |
| Most | Views on hateful content/total views | 24 | 0.0027376  | 0.0018889 | -0.0013689 | 0.0068441 |
| Most | Views on hateful content/total views | 25 | 0.0019015  | 0.0014323 | -0.0012123 | 0.0050154 |
| Most | Views on hateful content/total views | 26 | 0.0014796  | 0.0025300 | -0.0040206 | 0.0069799 |
| Most | Views on hateful content/total views | 27 | 0.0000535  | 0.0004300 | -0.0008814 | 0.0009883 |
| Most | Views on hateful content/total views | 28 | 0.0000102  | 0.0014307 | -0.0031002 | 0.0031205 |
| Most | Views on hateful content/total views | 29 | -0.0000931 | 0.0007745 | -0.0017769 | 0.0015907 |
| Most | Views on hateful content/total views | 30 | 0.0013607  | 0.0050053 | -0.0095210 | 0.0122425 |

| sample | outcome                              | event.time | estimate   | std.error | conf.low   | conf.high  |
|--------|--------------------------------------|------------|------------|-----------|------------|------------|
| Middle | Views on hateful content/total views | -30        | -0.0002295 | 0.0003968 | -0.0010832 | 0.0006242  |
| Middle | Views on hateful content/total views | -29        | 0.0002679  | 0.0004411 | -0.0006810 | 0.0012169  |
| Middle | Views on hateful content/total views | -28        | -0.0001787 | 0.0006427 | -0.0015614 | 0.0012039  |
| Middle | Views on hateful content/total views | -27        | 0.0000724  | 0.0004866 | -0.0009743 | 0.0011192  |
| Middle | Views on hateful content/total views | -26        | 0.0002420  | 0.0003781 | -0.0005714 | 0.0010555  |
| Middle | Views on hateful content/total views | -25        | 0.0000474  | 0.0002326 | -0.0004529 | 0.0005478  |
| Middle | Views on hateful content/total views | -24        | -0.0006038 | 0.0004012 | -0.0014668 | 0.0002593  |
| Middle | Views on hateful content/total views | -23        | 0.0001857  | 0.0003151 | -0.0004921 | 0.0008634  |
| Middle | Views on hateful content/total views | -22        | -0.0005875 | 0.0002318 | -0.0010862 | -0.0000889 |
| Middle | Views on hateful content/total views | -21        | 0.0006593  | 0.0003391 | -0.0000701 | 0.0013887  |
| Middle | Views on hateful content/total views | -20        | -0.0000926 | 0.0006331 | -0.0014546 | 0.0012693  |
| Middle | Views on hateful content/total views | -19        | 0.0011649  | 0.0008363 | -0.0006342 | 0.0029640  |
| Middle | Views on hateful content/total views | -18        | 0.0006457  | 0.0004834 | -0.0003941 | 0.0016855  |
| Middle | Views on hateful content/total views | -17        | 0.0002239  | 0.0003985 | -0.0006333 | 0.0010811  |
| Middle | Views on hateful content/total views | -16        | 0.0002392  | 0.0002825 | -0.0003685 | 0.0008469  |
| Middle | Views on hateful content/total views | -15        | 0.0002001  | 0.0003743 | -0.0006051 | 0.0010053  |

|        |                                      |     |            |           |            |           |
|--------|--------------------------------------|-----|------------|-----------|------------|-----------|
| Middle | Views on hateful content/total views | -14 | 0.0000930  | 0.0002891 | -0.0005288 | 0.0007149 |
| Middle | Views on hateful content/total views | -13 | 0.0001063  | 0.0004577 | -0.0008783 | 0.0010909 |
| Middle | Views on hateful content/total views | -12 | -0.0004762 | 0.0003653 | -0.0012620 | 0.0003096 |
| Middle | Views on hateful content/total views | -11 | 0.0000192  | 0.0006765 | -0.0014361 | 0.0014745 |
| Middle | Views on hateful content/total views | -10 | -0.0000157 | 0.0005279 | -0.0011513 | 0.0011199 |
| Middle | Views on hateful content/total views | -9  | 0.0003036  | 0.0002320 | -0.0001955 | 0.0008026 |
| Middle | Views on hateful content/total views | -8  | -0.0002775 | 0.0003517 | -0.0010341 | 0.0004790 |
| Middle | Views on hateful content/total views | -7  | -0.0008840 | 0.0007104 | -0.0024123 | 0.0006443 |
| Middle | Views on hateful content/total views | -6  | -0.0009294 | 0.0004350 | -0.0018653 | 0.0000064 |
| Middle | Views on hateful content/total views | -5  | -0.0002359 | 0.0006542 | -0.0016432 | 0.0011713 |
| Middle | Views on hateful content/total views | -4  | -0.0003296 | 0.0003860 | -0.0011600 | 0.0005009 |
| Middle | Views on hateful content/total views | -3  | -0.0008304 | 0.0005888 | -0.0020971 | 0.0004362 |
| Middle | Views on hateful content/total views | -2  | 0.0006470  | 0.0005903 | -0.0006228 | 0.0019168 |
| Middle | Views on hateful content/total views | -1  | 0.0004423  | 0.0004125 | -0.0004451 | 0.0013298 |
| Middle | Views on hateful content/total views | 0   | 0.0006268  | 0.0002942 | -0.0000061 | 0.0012597 |
| Middle | Views on hateful content/total views | 1   | 0.0010497  | 0.0009844 | -0.0010679 | 0.0031672 |
| Middle | Views on hateful content/total views | 2   | 0.0010464  | 0.0007199 | -0.0005023 | 0.0025951 |
| Middle | Views on hateful content/total views | 3   | 0.0013262  | 0.0008081 | -0.0004122 | 0.0030646 |
| Middle | Views on hateful content/total views | 4   | 0.0011493  | 0.0009873 | -0.0009747 | 0.0032733 |
| Middle | Views on hateful content/total views | 5   | 0.0010401  | 0.0009834 | -0.0010754 | 0.0031556 |
| Middle | Views on hateful content/total views | 6   | 0.0012850  | 0.0011625 | -0.0012157 | 0.0037857 |
| Middle | Views on hateful content/total views | 7   | 0.0014065  | 0.0010738 | -0.0009034 | 0.0037164 |
| Middle | Views on hateful content/total views | 8   | 0.0010920  | 0.0011056 | -0.0012863 | 0.0034703 |
| Middle | Views on hateful content/total views | 9   | 0.0006083  | 0.0008415 | -0.0012020 | 0.0024186 |
| Middle | Views on hateful content/total views | 10  | 0.0012080  | 0.0010501 | -0.0010510 | 0.0034671 |
| Middle | Views on hateful content/total views | 11  | 0.0012666  | 0.0012665 | -0.0014579 | 0.0039911 |
| Middle | Views on hateful content/total views | 12  | 0.0018573  | 0.0015700 | -0.0015202 | 0.0052347 |
| Middle | Views on hateful content/total views | 13  | 0.0014473  | 0.0013609 | -0.0014803 | 0.0043748 |
| Middle | Views on hateful content/total views | 14  | 0.0025563  | 0.0017728 | -0.0012573 | 0.0063699 |
| Middle | Views on hateful content/total views | 15  | 0.0031757  | 0.0018305 | -0.0007622 | 0.0071135 |
| Middle | Views on hateful content/total views | 16  | 0.0027615  | 0.0017323 | -0.0009650 | 0.0064881 |
| Middle | Views on hateful content/total views | 17  | 0.0027107  | 0.0013863 | -0.0002715 | 0.0056928 |
| Middle | Views on hateful content/total views | 18  | 0.0036865  | 0.0024584 | -0.0016019 | 0.0089750 |
| Middle | Views on hateful content/total views | 19  | 0.0027006  | 0.0015559 | -0.0006464 | 0.0060476 |
| Middle | Views on hateful content/total views | 20  | 0.0026181  | 0.0011157 | 0.0002181  | 0.0050181 |
| Middle | Views on hateful content/total views | 21  | 0.0024019  | 0.0021792 | -0.0022860 | 0.0070899 |
| Middle | Views on hateful content/total views | 22  | 0.0022795  | 0.0016817 | -0.0013383 | 0.0058973 |
| Middle | Views on hateful content/total views | 23  | 0.0029131  | 0.0016584 | -0.0006546 | 0.0064808 |
| Middle | Views on hateful content/total views | 24  | 0.0024814  | 0.0013767 | -0.0004802 | 0.0054430 |
| Middle | Views on hateful content/total views | 25  | 0.0027099  | 0.0019494 | -0.0014837 | 0.0069034 |
| Middle | Views on hateful content/total views | 26  | 0.0025997  | 0.0018162 | -0.0013074 | 0.0065069 |

|        |                                      |    |           |           |            |           |
|--------|--------------------------------------|----|-----------|-----------|------------|-----------|
| Middle | Views on hateful content/total views | 27 | 0.0004714 | 0.0032682 | -0.0065593 | 0.0075020 |
| Middle | Views on hateful content/total views | 28 | 0.0001973 | 0.0018472 | -0.0037764 | 0.0041711 |
| Middle | Views on hateful content/total views | 29 | 0.0003828 | 0.0045845 | -0.0094794 | 0.0102451 |
| Middle | Views on hateful content/total views | 30 | 0.0003704 | 0.0082951 | -0.0174741 | 0.0182148 |

| sample | outcome                              | event.time | estimate   | std.error | conf.low   | conf.high  |
|--------|--------------------------------------|------------|------------|-----------|------------|------------|
| Least  | Views on hateful content/total views | -30        | -0.0005420 | 0.0001004 | -0.0007720 | -0.0003121 |
| Least  | Views on hateful content/total views | -29        | -0.0001052 | 0.0000826 | -0.0002942 | 0.0000838  |
| Least  | Views on hateful content/total views | -28        | 0.0005517  | 0.0008967 | -0.0015011 | 0.0026046  |
| Least  | Views on hateful content/total views | -27        | -0.0001630 | 0.0006719 | -0.0017012 | 0.0013752  |
| Least  | Views on hateful content/total views | -26        | 0.0001601  | 0.0003637 | -0.0006724 | 0.0009926  |
| Least  | Views on hateful content/total views | -25        | -0.0003129 | 0.0003826 | -0.0011889 | 0.0005630  |
| Least  | Views on hateful content/total views | -24        | -0.0002112 | 0.0003880 | -0.0010993 | 0.0006770  |
| Least  | Views on hateful content/total views | -23        | 0.0004523  | 0.0004346 | -0.0005425 | 0.0014471  |
| Least  | Views on hateful content/total views | -22        | -0.0005601 | 0.0003736 | -0.0014154 | 0.0002951  |
| Least  | Views on hateful content/total views | -21        | 0.0011656  | 0.0004852 | 0.0000548  | 0.0022764  |
| Least  | Views on hateful content/total views | -20        | -0.0002095 | 0.0005489 | -0.0014662 | 0.0010471  |
| Least  | Views on hateful content/total views | -19        | 0.0013882  | 0.0003671 | 0.0005478  | 0.0022285  |
| Least  | Views on hateful content/total views | -18        | -0.0000412 | 0.0006159 | -0.0014512 | 0.0013688  |
| Least  | Views on hateful content/total views | -17        | 0.0004379  | 0.0001413 | 0.0001146  | 0.0007613  |
| Least  | Views on hateful content/total views | -16        | 0.0008257  | 0.0006700 | -0.0007082 | 0.0023596  |
| Least  | Views on hateful content/total views | -15        | -0.0005184 | 0.0002716 | -0.0011401 | 0.0001033  |
| Least  | Views on hateful content/total views | -14        | 0.0000121  | 0.0004194 | -0.0009480 | 0.0009722  |
| Least  | Views on hateful content/total views | -13        | 0.0001303  | 0.0003201 | -0.0006025 | 0.0008630  |
| Least  | Views on hateful content/total views | -12        | -0.0002812 | 0.0005655 | -0.0015758 | 0.0010133  |
| Least  | Views on hateful content/total views | -11        | 0.0000266  | 0.0002417 | -0.0005268 | 0.0005800  |
| Least  | Views on hateful content/total views | -10        | -0.0001776 | 0.0008007 | -0.0020106 | 0.0016553  |
| Least  | Views on hateful content/total views | -9         | 0.0000907  | 0.0004299 | -0.0008935 | 0.0010750  |
| Least  | Views on hateful content/total views | -8         | -0.0006329 | 0.0005886 | -0.0019804 | 0.0007145  |
| Least  | Views on hateful content/total views | -7         | -0.0002167 | 0.0005700 | -0.0015215 | 0.0010881  |
| Least  | Views on hateful content/total views | -6         | -0.0013793 | 0.0005268 | -0.0025852 | -0.0001734 |
| Least  | Views on hateful content/total views | -5         | -0.0003287 | 0.0004380 | -0.0013315 | 0.0006741  |
| Least  | Views on hateful content/total views | -4         | 0.0000032  | 0.0003883 | -0.0008857 | 0.0008920  |
| Least  | Views on hateful content/total views | -3         | -0.0006953 | 0.0009310 | -0.0028266 | 0.0014361  |
| Least  | Views on hateful content/total views | -2         | -0.0005008 | 0.0007198 | -0.0021485 | 0.0011469  |
| Least  | Views on hateful content/total views | -1         | 0.0004587  | 0.0006274 | -0.0009774 | 0.0018949  |
| Least  | Views on hateful content/total views | 0          | 0.0008850  | 0.0005064 | -0.0002743 | 0.0020443  |
| Least  | Views on hateful content/total views | 1          | 0.0014024  | 0.0005864 | 0.0000600  | 0.0027448  |
| Least  | Views on hateful content/total views | 2          | 0.0010281  | 0.0007127 | -0.0006035 | 0.0026596  |
| Least  | Views on hateful content/total views | 3          | 0.0016547  | 0.0008855 | -0.0003724 | 0.0036818  |
| Least  | Views on hateful content/total views | 4          | 0.0015462  | 0.0010123 | -0.0007712 | 0.0038635  |

|       |                                      |    |            |           |            |            |
|-------|--------------------------------------|----|------------|-----------|------------|------------|
| Least | Views on hateful content/total views | 5  | 0.0016025  | 0.0010685 | -0.0008435 | 0.0040486  |
| Least | Views on hateful content/total views | 6  | 0.0017270  | 0.0014251 | -0.0015354 | 0.0049894  |
| Least | Views on hateful content/total views | 7  | 0.0016726  | 0.0013286 | -0.0013688 | 0.0047141  |
| Least | Views on hateful content/total views | 8  | 0.0012292  | 0.0008568 | -0.0007323 | 0.0031906  |
| Least | Views on hateful content/total views | 9  | 0.0007671  | 0.0009806 | -0.0014776 | 0.0030119  |
| Least | Views on hateful content/total views | 10 | 0.0018219  | 0.0015561 | -0.0017404 | 0.0053842  |
| Least | Views on hateful content/total views | 11 | 0.0020916  | 0.0012200 | -0.0007012 | 0.0048844  |
| Least | Views on hateful content/total views | 12 | 0.0016766  | 0.0016546 | -0.0021112 | 0.0054645  |
| Least | Views on hateful content/total views | 13 | 0.0010151  | 0.0015597 | -0.0025554 | 0.0045855  |
| Least | Views on hateful content/total views | 14 | 0.0022001  | 0.0029162 | -0.0044759 | 0.0088760  |
| Least | Views on hateful content/total views | 15 | 0.0023459  | 0.0027272 | -0.0038973 | 0.0085890  |
| Least | Views on hateful content/total views | 16 | 0.0022057  | 0.0023026 | -0.0030655 | 0.0074769  |
| Least | Views on hateful content/total views | 17 | 0.0026907  | 0.0009119 | 0.0006032  | 0.0047781  |
| Least | Views on hateful content/total views | 18 | 0.0031653  | 0.0031695 | -0.0040904 | 0.0104211  |
| Least | Views on hateful content/total views | 19 | 0.0024667  | 0.0019863 | -0.0020805 | 0.0070138  |
| Least | Views on hateful content/total views | 20 | 0.0017392  | 0.0003234 | 0.0009989  | 0.0024796  |
| Least | Views on hateful content/total views | 21 | 0.0019858  | 0.0033479 | -0.0056782 | 0.0096499  |
| Least | Views on hateful content/total views | 22 | 0.0020442  | 0.0047969 | -0.0089371 | 0.0130254  |
| Least | Views on hateful content/total views | 23 | 0.0028208  | 0.0028073 | -0.0036057 | 0.0092474  |
| Least | Views on hateful content/total views | 24 | 0.0029550  | 0.0012568 | 0.0000780  | 0.0058320  |
| Least | Views on hateful content/total views | 25 | 0.0018783  | 0.0026005 | -0.0040749 | 0.0078315  |
| Least | Views on hateful content/total views | 26 | 0.0016684  | 0.0033002 | -0.0058866 | 0.0092234  |
| Least | Views on hateful content/total views | 27 | -0.0014540 | 0.0021984 | -0.0064866 | 0.0035786  |
| Least | Views on hateful content/total views | 28 | -0.0012321 | 0.0076294 | -0.0186975 | 0.0162333  |
| Least | Views on hateful content/total views | 29 | -0.0022607 | 0.0027080 | -0.0084601 | 0.0039386  |
| Least | Views on hateful content/total views | 30 | -0.0019910 | 0.0008290 | -0.0038889 | -0.0000932 |



## Views on non...organization content that is hateful

Average effect by length of exposure (Callaway and Sant'Anna)

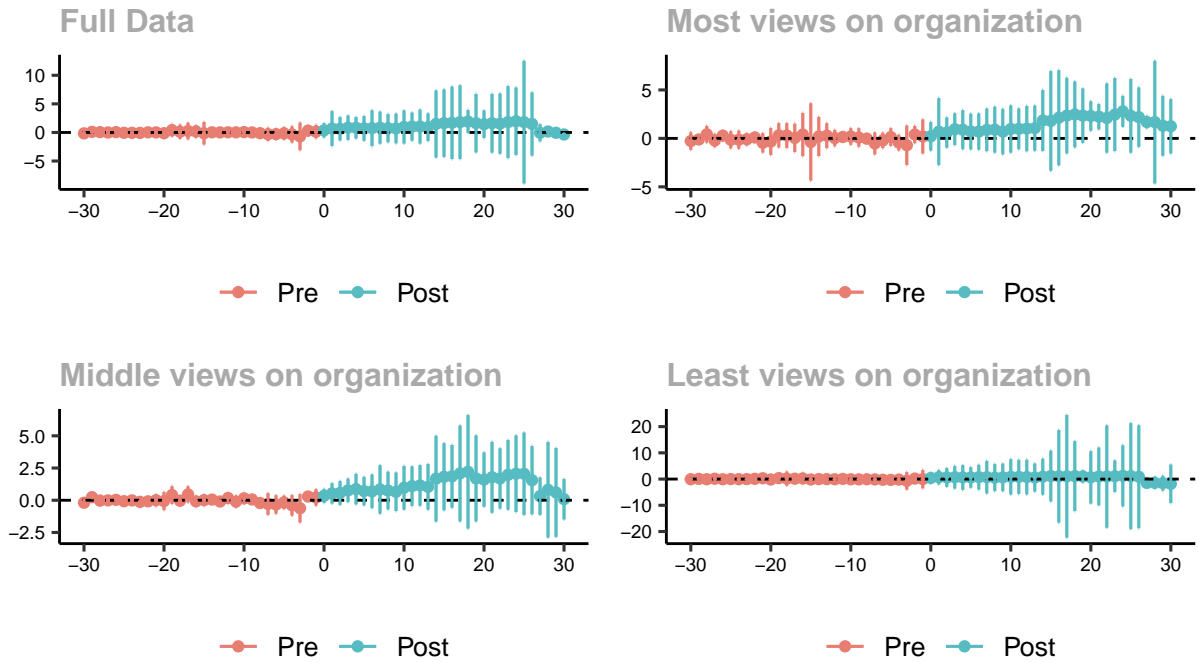

Long timeframe with sampled control groups

| sample | outcome                                          | event.time | estimate   | std.error | conf.low   | conf.high |
|--------|--------------------------------------------------|------------|------------|-----------|------------|-----------|
| Full   | Views on nonorganization content that is hateful | -30        | -0.1594788 | 0.0908150 | -0.6227216 | 0.3037639 |
| Full   | Views on nonorganization content that is hateful | -29        | 0.1020140  | 0.0354047 | -0.0785835 | 0.2826115 |
| Full   | Views on nonorganization content that is hateful | -28        | 0.0545432  | 0.0838740 | -0.3732936 | 0.4823801 |
| Full   | Views on nonorganization content that is hateful | -27        | -0.0095735 | 0.0699134 | -0.3661981 | 0.3470512 |
| Full   | Views on nonorganization content that is hateful | -26        | 0.0548202  | 0.0890151 | -0.3992414 | 0.5088818 |
| Full   | Views on nonorganization content that is hateful | -25        | -0.0607390 | 0.0938336 | -0.5393795 | 0.4179014 |
| Full   | Views on nonorganization content that is hateful | -24        | -0.0645564 | 0.0923206 | -0.5354794 | 0.4063666 |
| Full   | Views on nonorganization content that is hateful | -23        | -0.0764548 | 0.0587631 | -0.3762023 | 0.2232927 |
| Full   | Views on nonorganization content that is hateful | -22        | 0.0181276  | 0.0355547 | -0.1632351 | 0.1994902 |
| Full   | Views on nonorganization content that is hateful | -21        | 0.0046228  | 0.1433108 | -0.7263984 | 0.7356439 |
| Full   | Views on nonorganization content that is hateful | -20        | -0.1311355 | 0.1645572 | -0.9705333 | 0.7082623 |
| Full   | Views on nonorganization content that is hateful | -19        | 0.3867036  | 0.2093350 | -0.6811034 | 1.4545107 |
| Full   | Views on nonorganization content that is hateful | -18        | 0.1223621  | 0.2428065 | -1.1161814 | 1.3609056 |
| Full   | Views on nonorganization content that is hateful | -17        | 0.2551420  | 0.2834135 | -1.1905362 | 1.7008202 |
| Full   | Views on nonorganization content that is hateful | -16        | 0.1676340  | 0.2100046 | -0.9035887 | 1.2388568 |
| Full   | Views on nonorganization content that is hateful | -15        | -0.1363677 | 0.3836180 | -2.0931839 | 1.8204485 |
| Full   | Views on nonorganization content that is hateful | -14        | 0.0277707  | 0.1119525 | -0.5432935 | 0.5988350 |
| Full   | Views on nonorganization content that is hateful | -13        | 0.0062243  | 0.0664311 | -0.3326373 | 0.3450858 |
| Full   | Views on nonorganization content that is hateful | -12        | 0.0310788  | 0.1064169 | -0.5117482 | 0.5739058 |

|      |                                                  |     |            |           |            |            |
|------|--------------------------------------------------|-----|------------|-----------|------------|------------|
| Full | Views on nonorganization content that is hateful | -11 | 0.0195447  | 0.1000301 | -0.4907039 | 0.5297932  |
| Full | Views on nonorganization content that is hateful | -10 | 0.0600020  | 0.1286035 | -0.5959980 | 0.7160020  |
| Full | Views on nonorganization content that is hateful | -9  | 0.0012809  | 0.0389401 | -0.1973507 | 0.1999126  |
| Full | Views on nonorganization content that is hateful | -8  | -0.1235028 | 0.0597897 | -0.4284870 | 0.1814813  |
| Full | Views on nonorganization content that is hateful | -7  | -0.3172152 | 0.2218541 | -1.4488820 | 0.8144516  |
| Full | Views on nonorganization content that is hateful | -6  | -0.2864286 | 0.1800228 | -1.2047160 | 0.6318587  |
| Full | Views on nonorganization content that is hateful | -5  | -0.1603508 | 0.2095419 | -1.2292133 | 0.9085117  |
| Full | Views on nonorganization content that is hateful | -4  | -0.3419166 | 0.2761066 | -1.7503226 | 1.0664894  |
| Full | Views on nonorganization content that is hateful | -3  | -0.6915617 | 0.4707583 | -3.0928759 | 1.7097526  |
| Full | Views on nonorganization content that is hateful | -2  | 0.3117832  | 0.1700187 | -0.5554736 | 1.1790400  |
| Full | Views on nonorganization content that is hateful | -1  | 0.1514020  | 0.2283574 | -1.0134378 | 1.3162418  |
| Full | Views on nonorganization content that is hateful | 0   | 0.3723619  | 0.2418168 | -0.8611332 | 1.6058570  |
| Full | Views on nonorganization content that is hateful | 1   | 0.6866104  | 0.5962701 | -2.3549334 | 3.7281542  |
| Full | Views on nonorganization content that is hateful | 2   | 0.6445398  | 0.3984217 | -1.3877892 | 2.6768688  |
| Full | Views on nonorganization content that is hateful | 3   | 0.8301860  | 0.4147308 | -1.2853348 | 2.9457067  |
| Full | Views on nonorganization content that is hateful | 4   | 0.8206096  | 0.3664249 | -1.0485050 | 2.6897243  |
| Full | Views on nonorganization content that is hateful | 5   | 0.7172029  | 0.4210430 | -1.4305162 | 2.8649221  |
| Full | Views on nonorganization content that is hateful | 6   | 0.7467279  | 0.6122584 | -2.3763713 | 3.8698271  |
| Full | Views on nonorganization content that is hateful | 7   | 0.8402492  | 0.5467130 | -1.9485062 | 3.6290046  |
| Full | Views on nonorganization content that is hateful | 8   | 0.7431007  | 0.4802264 | -1.7065099 | 3.1927112  |
| Full | Views on nonorganization content that is hateful | 9   | 0.6971821  | 0.5068970 | -1.8884739 | 3.2828382  |
| Full | Views on nonorganization content that is hateful | 10  | 0.9661900  | 0.5653741 | -1.9177546 | 3.8501346  |
| Full | Views on nonorganization content that is hateful | 11  | 1.0204790  | 0.4794476 | -1.4251588 | 3.4661168  |
| Full | Views on nonorganization content that is hateful | 12  | 1.0336271  | 0.5794235 | -1.9219829 | 3.9892371  |
| Full | Views on nonorganization content that is hateful | 13  | 0.9152640  | 0.4731355 | -1.4981761 | 3.3287042  |
| Full | Views on nonorganization content that is hateful | 14  | 1.4888006  | 1.1463662 | -4.3587555 | 7.3363567  |
| Full | Views on nonorganization content that is hateful | 15  | 1.6273457  | 1.1533861 | -4.2560185 | 7.5107100  |
| Full | Views on nonorganization content that is hateful | 16  | 1.6846485  | 1.2406231 | -4.6437073 | 8.0130043  |
| Full | Views on nonorganization content that is hateful | 17  | 1.8085529  | 1.2618511 | -4.6280861 | 8.2451920  |
| Full | Views on nonorganization content that is hateful | 18  | 1.9043644  | 0.3922946 | -0.0967108 | 3.9054395  |
| Full | Views on nonorganization content that is hateful | 19  | 1.6237891  | 0.9989338 | -3.4717219 | 6.7193002  |
| Full | Views on nonorganization content that is hateful | 20  | 1.4393472  | 0.4690591 | -0.9532998 | 3.8319942  |
| Full | Views on nonorganization content that is hateful | 21  | 1.6189697  | 1.0043805 | -3.5043244 | 6.7422637  |
| Full | Views on nonorganization content that is hateful | 22  | 1.5458071  | 1.0313947 | -3.7152854 | 6.8068997  |
| Full | Views on nonorganization content that is hateful | 23  | 1.8119725  | 1.2323657 | -4.4742626 | 8.0982076  |
| Full | Views on nonorganization content that is hateful | 24  | 1.9590890  | 1.1546780 | -3.9308654 | 7.8490433  |
| Full | Views on nonorganization content that is hateful | 25  | 1.8128550  | 2.0995830 | -8.8970120 | 12.5227220 |
| Full | Views on nonorganization content that is hateful | 26  | 1.4860338  | 1.0806699 | -4.0264091 | 6.9984767  |
| Full | Views on nonorganization content that is hateful | 27  | -0.0586306 | 0.2893683 | -1.5346836 | 1.4174224  |
| Full | Views on nonorganization content that is hateful | 28  | 0.1624302  | 0.0968352 | -0.3315215 | 0.6563819  |
| Full | Views on nonorganization content that is hateful | 29  | -0.0544829 | 0.0351294 | -0.2336760 | 0.1247102  |

|      |                                                  |    |            |           |            |            |
|------|--------------------------------------------------|----|------------|-----------|------------|------------|
| Full | Views on nonorganization content that is hateful | 30 | -0.3517316 | 0.0008190 | -0.3559092 | -0.3475539 |
|------|--------------------------------------------------|----|------------|-----------|------------|------------|

| sample | outcome                                          | event.time | estimate   | std.error | conf.low   | conf.high |
|--------|--------------------------------------------------|------------|------------|-----------|------------|-----------|
| Most   | Views on nonorganization content that is hateful | -30        | -0.2750509 | 0.2451733 | -1.1733165 | 0.6232147 |
| Most   | Views on nonorganization content that is hateful | -29        | -0.1142233 | 0.0847386 | -0.4246885 | 0.1962419 |
| Most   | Views on nonorganization content that is hateful | -28        | 0.4220041  | 0.2352619 | -0.4399484 | 1.2839566 |
| Most   | Views on nonorganization content that is hateful | -27        | -0.2175624 | 0.1873667 | -0.9040362 | 0.4689115 |
| Most   | Views on nonorganization content that is hateful | -26        | 0.2827209  | 0.1461039 | -0.2525745 | 0.8180163 |
| Most   | Views on nonorganization content that is hateful | -25        | -0.1469721 | 0.2412750 | -1.0309554 | 0.7370112 |
| Most   | Views on nonorganization content that is hateful | -24        | -0.1364412 | 0.2539874 | -1.0670001 | 0.7941178 |
| Most   | Views on nonorganization content that is hateful | -23        | -0.0875409 | 0.1721998 | -0.7184463 | 0.5433646 |
| Most   | Views on nonorganization content that is hateful | -22        | 0.0977802  | 0.1326956 | -0.3883899 | 0.5839503 |
| Most   | Views on nonorganization content that is hateful | -21        | -0.4593236 | 0.2701737 | -1.4491858 | 0.5305386 |
| Most   | Views on nonorganization content that is hateful | -20        | -0.3251532 | 0.3773212 | -1.7075824 | 1.0572760 |
| Most   | Views on nonorganization content that is hateful | -19        | 0.3158604  | 0.3396882 | -0.9286890 | 1.5604099 |
| Most   | Views on nonorganization content that is hateful | -18        | 0.2958409  | 0.3490366 | -0.9829593 | 1.5746410 |
| Most   | Views on nonorganization content that is hateful | -17        | 0.0514193  | 0.3968987 | -1.4027380 | 1.5055766 |
| Most   | Views on nonorganization content that is hateful | -16        | 0.3967402  | 0.6065294 | -1.8254617 | 2.6189421 |
| Most   | Views on nonorganization content that is hateful | -15        | -0.3700876 | 1.0854439 | -4.3469361 | 3.6067609 |
| Most   | Views on nonorganization content that is hateful | -14        | 0.1964463  | 0.5495398 | -1.8169574 | 2.2098499 |
| Most   | Views on nonorganization content that is hateful | -13        | 0.2796512  | 0.3487095 | -0.9979503 | 1.5572528 |
| Most   | Views on nonorganization content that is hateful | -12        | 0.0352327  | 0.2295529 | -0.8058030 | 0.8762684 |
| Most   | Views on nonorganization content that is hateful | -11        | 0.1476277  | 0.1345455 | -0.3453202 | 0.6405755 |
| Most   | Views on nonorganization content that is hateful | -10        | 0.1949252  | 0.2315712 | -0.6535051 | 1.0433554 |
| Most   | Views on nonorganization content that is hateful | -9         | 0.0830935  | 0.2566676 | -0.8572851 | 1.0234721 |
| Most   | Views on nonorganization content that is hateful | -8         | -0.0296785 | 0.1331865 | -0.5176469 | 0.4582899 |
| Most   | Views on nonorganization content that is hateful | -7         | -0.5181099 | 0.3073859 | -1.6443100 | 0.6080903 |
| Most   | Views on nonorganization content that is hateful | -6         | -0.2101286 | 0.2162783 | -1.0025289 | 0.5822718 |
| Most   | Views on nonorganization content that is hateful | -5         | 0.1350805  | 0.2463246 | -0.7674032 | 1.0375643 |
| Most   | Views on nonorganization content that is hateful | -4         | -0.4329192 | 0.2196195 | -1.2375610 | 0.3717227 |
| Most   | Views on nonorganization content that is hateful | -3         | -0.7127692 | 0.5527770 | -2.7380332 | 1.3124947 |
| Most   | Views on nonorganization content that is hateful | -2         | 0.3980048  | 0.2422110 | -0.4894078 | 1.2854174 |
| Most   | Views on nonorganization content that is hateful | -1         | 0.1966459  | 0.4764457 | -1.5489556 | 1.9422474 |
| Most   | Views on nonorganization content that is hateful | 0          | 0.2179586  | 0.3991577 | -1.2444750 | 1.6803922 |
| Most   | Views on nonorganization content that is hateful | 1          | 0.6954227  | 0.9417324 | -2.7548956 | 4.1457411 |
| Most   | Views on nonorganization content that is hateful | 2          | 0.5976971  | 0.4228884 | -0.9516811 | 2.1470754 |
| Most   | Views on nonorganization content that is hateful | 3          | 0.9479506  | 0.4460539 | -0.6863012 | 2.5822024 |
| Most   | Views on nonorganization content that is hateful | 4          | 0.8939392  | 0.5476341 | -1.1124822 | 2.9003607 |
| Most   | Views on nonorganization content that is hateful | 5          | 0.7041094  | 0.5017858 | -1.1343331 | 2.5425519 |
| Most   | Views on nonorganization content that is hateful | 6          | 0.7028505  | 0.5090372 | -1.1621594 | 2.5678605 |
| Most   | Views on nonorganization content that is hateful | 7          | 0.8760699  | 0.5974458 | -1.3128517 | 3.0649914 |

|      |                                                  |    |           |           |            |           |
|------|--------------------------------------------------|----|-----------|-----------|------------|-----------|
| Most | Views on nonorganization content that is hateful | 8  | 0.9006702 | 0.6442708 | -1.4598085 | 3.2611490 |
| Most | Views on nonorganization content that is hateful | 9  | 0.6998232 | 0.6390235 | -1.6414307 | 3.0410771 |
| Most | Views on nonorganization content that is hateful | 10 | 0.9661026 | 0.6609493 | -1.4554829 | 3.3876881 |
| Most | Views on nonorganization content that is hateful | 11 | 0.9797780 | 0.5723713 | -1.1172754 | 3.0768314 |
| Most | Views on nonorganization content that is hateful | 12 | 1.0140810 | 0.6363155 | -1.3172514 | 3.3454134 |
| Most | Views on nonorganization content that is hateful | 13 | 1.0554898 | 0.6335917 | -1.2658629 | 3.3768424 |
| Most | Views on nonorganization content that is hateful | 14 | 1.8505830 | 0.8567018 | -1.2882004 | 4.9893664 |
| Most | Views on nonorganization content that is hateful | 15 | 1.8060590 | 1.4024801 | -3.3323467 | 6.9444647 |
| Most | Views on nonorganization content that is hateful | 16 | 2.1292324 | 1.3377794 | -2.7721227 | 7.0305875 |
| Most | Views on nonorganization content that is hateful | 17 | 2.3544882 | 1.0630393 | -1.5402742 | 6.2492506 |
| Most | Views on nonorganization content that is hateful | 18 | 2.4705931 | 0.9254466 | -0.9200576 | 5.8612438 |
| Most | Views on nonorganization content that is hateful | 19 | 2.3471045 | 0.7614996 | -0.4428773 | 5.1370863 |
| Most | Views on nonorganization content that is hateful | 20 | 2.3111241 | 0.4138970 | 0.7946886  | 3.8275595 |
| Most | Views on nonorganization content that is hateful | 21 | 2.2428945 | 0.3563812 | 0.9371853  | 3.5486038 |
| Most | Views on nonorganization content that is hateful | 22 | 2.1016817 | 0.9715271 | -1.4577984 | 5.6611618 |
| Most | Views on nonorganization content that is hateful | 23 | 2.4623459 | 1.0267681 | -1.2995264 | 6.2242183 |
| Most | Views on nonorganization content that is hateful | 24 | 2.7869036 | 0.4345055 | 1.1949625  | 4.3788447 |
| Most | Views on nonorganization content that is hateful | 25 | 2.3342698 | 1.0357960 | -1.4606787 | 6.1292182 |
| Most | Views on nonorganization content that is hateful | 26 | 2.1855252 | 0.8352340 | -0.8746043 | 5.2456548 |
| Most | Views on nonorganization content that is hateful | 27 | 1.6852477 | 0.1726888 | 1.0525506  | 2.3179448 |
| Most | Views on nonorganization content that is hateful | 28 | 1.6811208 | 1.7243840 | -4.6366760 | 7.9989177 |
| Most | Views on nonorganization content that is hateful | 29 | 1.3004975 | 0.8406449 | -1.7794566 | 4.3804516 |
| Most | Views on nonorganization content that is hateful | 30 | 1.2490087 | 0.7632746 | -1.5474761 | 4.0454935 |

| sample | outcome                                          | event.time | estimate   | std.error | conf.low   | conf.high |
|--------|--------------------------------------------------|------------|------------|-----------|------------|-----------|
| Middle | Views on nonorganization content that is hateful | -30        | -0.1914055 | 0.1148205 | -0.4815799 | 0.0987689 |
| Middle | Views on nonorganization content that is hateful | -29        | 0.2397722  | 0.0408648 | 0.1364987  | 0.3430458 |
| Middle | Views on nonorganization content that is hateful | -28        | -0.0269764 | 0.1404495 | -0.3819205 | 0.3279677 |
| Middle | Views on nonorganization content that is hateful | -27        | -0.0092221 | 0.1085922 | -0.2836564 | 0.2652121 |
| Middle | Views on nonorganization content that is hateful | -26        | 0.0331279  | 0.1033785 | -0.2281302 | 0.2943861 |
| Middle | Views on nonorganization content that is hateful | -25        | -0.0730756 | 0.1287931 | -0.3985615 | 0.2524103 |
| Middle | Views on nonorganization content that is hateful | -24        | -0.0117532 | 0.1010411 | -0.2671042 | 0.2435979 |
| Middle | Views on nonorganization content that is hateful | -23        | -0.1253517 | 0.0547620 | -0.2637463 | 0.0130429 |
| Middle | Views on nonorganization content that is hateful | -22        | -0.0833668 | 0.0349253 | -0.1716302 | 0.0048966 |
| Middle | Views on nonorganization content that is hateful | -21        | 0.0031844  | 0.1821650 | -0.4571830 | 0.4635518 |
| Middle | Views on nonorganization content that is hateful | -20        | -0.0599485 | 0.2771426 | -0.7603434 | 0.6404464 |
| Middle | Views on nonorganization content that is hateful | -19        | 0.4034429  | 0.2692062 | -0.2768953 | 1.0837811 |
| Middle | Views on nonorganization content that is hateful | -18        | -0.0371654 | 0.1467554 | -0.4080459 | 0.3337150 |
| Middle | Views on nonorganization content that is hateful | -17        | 0.4554062  | 0.2460421 | -0.1663915 | 1.0772038 |
| Middle | Views on nonorganization content that is hateful | -16        | -0.0864672 | 0.1625144 | -0.4971736 | 0.3242392 |
| Middle | Views on nonorganization content that is hateful | -15        | 0.0088402  | 0.1703699 | -0.4217187 | 0.4393991 |

|        |                                                  |     |            |           |            |            |
|--------|--------------------------------------------------|-----|------------|-----------|------------|------------|
| Middle | Views on nonorganization content that is hateful | -14 | 0.0521910  | 0.1084660 | -0.2219244 | 0.3263064  |
| Middle | Views on nonorganization content that is hateful | -13 | -0.0965775 | 0.0724967 | -0.2797911 | 0.0866361  |
| Middle | Views on nonorganization content that is hateful | -12 | 0.1709431  | 0.1569701 | -0.2257519 | 0.5676380  |
| Middle | Views on nonorganization content that is hateful | -11 | -0.1037472 | 0.1816438 | -0.5627975 | 0.3553032  |
| Middle | Views on nonorganization content that is hateful | -10 | 0.1435122  | 0.1670872 | -0.2787506 | 0.5657750  |
| Middle | Views on nonorganization content that is hateful | -9  | 0.0611698  | 0.0901913 | -0.1667616 | 0.2891012  |
| Middle | Views on nonorganization content that is hateful | -8  | -0.2165317 | 0.0507207 | -0.3447132 | -0.0883503 |
| Middle | Views on nonorganization content that is hateful | -7  | -0.2904260 | 0.3293011 | -1.1226360 | 0.5417841  |
| Middle | Views on nonorganization content that is hateful | -6  | -0.3306927 | 0.2811440 | -1.0412001 | 0.3798146  |
| Middle | Views on nonorganization content that is hateful | -5  | -0.1651001 | 0.2049818 | -0.6831302 | 0.3529301  |
| Middle | Views on nonorganization content that is hateful | -4  | -0.3970532 | 0.3140300 | -1.1906700 | 0.3965635  |
| Middle | Views on nonorganization content that is hateful | -3  | -0.6205112 | 0.4335789 | -1.7162521 | 0.4752298  |
| Middle | Views on nonorganization content that is hateful | -2  | 0.2889554  | 0.1182302 | -0.0098360 | 0.5877468  |
| Middle | Views on nonorganization content that is hateful | -1  | 0.2165388  | 0.2501974 | -0.4157603 | 0.8488378  |
| Middle | Views on nonorganization content that is hateful | 0   | 0.3381959  | 0.2137404 | -0.2019688 | 0.8783607  |
| Middle | Views on nonorganization content that is hateful | 1   | 0.5308671  | 0.3106659 | -0.2542480 | 1.3159821  |
| Middle | Views on nonorganization content that is hateful | 2   | 0.5648601  | 0.3640627 | -0.3551995 | 1.4849197  |
| Middle | Views on nonorganization content that is hateful | 3   | 0.7681828  | 0.3591069 | -0.1393525 | 1.6757180  |
| Middle | Views on nonorganization content that is hateful | 4   | 0.8677513  | 0.4668312 | -0.3120247 | 2.0475273  |
| Middle | Views on nonorganization content that is hateful | 5   | 0.7120408  | 0.4343211 | -0.3855758 | 1.8096573  |
| Middle | Views on nonorganization content that is hateful | 6   | 0.6914353  | 0.5136659 | -0.6067015 | 1.9895721  |
| Middle | Views on nonorganization content that is hateful | 7   | 0.8391273  | 0.7420641 | -1.0362175 | 2.7144721  |
| Middle | Views on nonorganization content that is hateful | 8   | 0.7548072  | 0.5761658 | -0.7012794 | 2.2108939  |
| Middle | Views on nonorganization content that is hateful | 9   | 0.6545793  | 0.5892474 | -0.8345671 | 2.1437258  |
| Middle | Views on nonorganization content that is hateful | 10  | 0.9697831  | 0.6674291 | -0.7169442 | 2.6565104  |
| Middle | Views on nonorganization content that is hateful | 11  | 1.0972453  | 0.6028998 | -0.4264035 | 2.6208940  |
| Middle | Views on nonorganization content that is hateful | 12  | 1.1488645  | 0.6219532 | -0.4229361 | 2.7206651  |
| Middle | Views on nonorganization content that is hateful | 13  | 1.0379485  | 0.6990924 | -0.7287981 | 2.8046952  |
| Middle | Views on nonorganization content that is hateful | 14  | 1.6762465  | 1.3141525 | -1.6448806 | 4.9973736  |
| Middle | Views on nonorganization content that is hateful | 15  | 1.8226630  | 1.0270152 | -0.7728104 | 4.4181365  |
| Middle | Views on nonorganization content that is hateful | 16  | 1.8576401  | 0.9620685 | -0.5737000 | 4.2889802  |
| Middle | Views on nonorganization content that is hateful | 17  | 2.0803015  | 1.4697463 | -1.6340422 | 5.7946453  |
| Middle | Views on nonorganization content that is hateful | 18  | 2.2122036  | 1.7405497 | -2.1865148 | 6.6109219  |
| Middle | Views on nonorganization content that is hateful | 19  | 1.6966564  | 1.3187430 | -1.6360718 | 5.0293846  |
| Middle | Views on nonorganization content that is hateful | 20  | 1.6053473  | 0.8310563 | -0.4948987 | 3.7055932  |
| Middle | Views on nonorganization content that is hateful | 21  | 1.7849138  | 1.0867263 | -0.9614616 | 4.5312893  |
| Middle | Views on nonorganization content that is hateful | 22  | 1.6917297  | 0.9220971 | -0.6385946 | 4.0220540  |
| Middle | Views on nonorganization content that is hateful | 23  | 1.9731661  | 1.0664433 | -0.7219500 | 4.6682822  |
| Middle | Views on nonorganization content that is hateful | 24  | 2.0582423  | 1.1752616 | -0.9118796 | 5.0283643  |
| Middle | Views on nonorganization content that is hateful | 25  | 2.0566874  | 1.2624625 | -1.1338086 | 5.2471834  |
| Middle | Views on nonorganization content that is hateful | 26  | 1.5564947  | 1.0447896 | -1.0838982 | 4.1968875  |

|        |                                                  |    |           |           |            |           |
|--------|--------------------------------------------------|----|-----------|-----------|------------|-----------|
| Middle | Views on nonorganization content that is hateful | 27 | 0.3187777 | 0.5716054 | -1.1257837 | 1.7633391 |
| Middle | Views on nonorganization content that is hateful | 28 | 0.8137800 | 1.4659557 | -2.8909840 | 4.5185441 |
| Middle | Views on nonorganization content that is hateful | 29 | 0.6033556 | 1.3616966 | -2.8379248 | 4.0446360 |
| Middle | Views on nonorganization content that is hateful | 30 | 0.0842301 | 0.6195870 | -1.4815907 | 1.6500508 |

| sample | outcome                                          | event.time | estimate   | std.error | conf.low   | conf.high |
|--------|--------------------------------------------------|------------|------------|-----------|------------|-----------|
| Least  | Views on nonorganization content that is hateful | -30        | -0.0603217 | 0.0727624 | -0.5909722 | 0.4703288 |
| Least  | Views on nonorganization content that is hateful | -29        | 0.0751493  | 0.1191463 | -0.7937755 | 0.9440740 |
| Least  | Views on nonorganization content that is hateful | -28        | -0.0695978 | 0.1558930 | -1.2065135 | 1.0673178 |
| Least  | Views on nonorganization content that is hateful | -27        | 0.1304497  | 0.1905123 | -1.2589418 | 1.5198412 |
| Least  | Views on nonorganization content that is hateful | -26        | -0.0816879 | 0.2072939 | -1.5934665 | 1.4300908 |
| Least  | Views on nonorganization content that is hateful | -25        | -0.0085557 | 0.1109004 | -0.8173442 | 0.8002328 |
| Least  | Views on nonorganization content that is hateful | -24        | -0.0397465 | 0.1196669 | -0.9124683 | 0.8329753 |
| Least  | Views on nonorganization content that is hateful | -23        | -0.0200935 | 0.0670729 | -0.5092508 | 0.4690639 |
| Least  | Views on nonorganization content that is hateful | -22        | 0.0925241  | 0.0559319 | -0.3153834 | 0.5004315 |
| Least  | Views on nonorganization content that is hateful | -21        | 0.3030380  | 0.1971405 | -1.1346926 | 1.7407686 |
| Least  | Views on nonorganization content that is hateful | -20        | -0.1672153 | 0.0914042 | -0.8338191 | 0.4993886 |
| Least  | Views on nonorganization content that is hateful | -19        | 0.3545159  | 0.0788046 | -0.2202004 | 0.9292321 |
| Least  | Views on nonorganization content that is hateful | -18        | 0.1724139  | 0.3646879 | -2.4872271 | 2.8320549 |
| Least  | Views on nonorganization content that is hateful | -17        | 0.1376046  | 0.2170400 | -1.4452516 | 1.7204608 |
| Least  | Views on nonorganization content that is hateful | -16        | 0.2347430  | 0.2848532 | -1.8426700 | 2.3121559 |
| Least  | Views on nonorganization content that is hateful | -15        | -0.1572169 | 0.1969151 | -1.5933035 | 1.2788697 |
| Least  | Views on nonorganization content that is hateful | -14        | -0.0172550 | 0.1057476 | -0.7884645 | 0.7539544 |
| Least  | Views on nonorganization content that is hateful | -13        | -0.0343171 | 0.1360284 | -1.0263621 | 0.9577280 |
| Least  | Views on nonorganization content that is hateful | -12        | -0.0799715 | 0.1775309 | -1.3746911 | 1.2147480 |
| Least  | Views on nonorganization content that is hateful | -11        | 0.0614654  | 0.1234021 | -0.8384970 | 0.9614277 |
| Least  | Views on nonorganization content that is hateful | -10        | -0.0733056 | 0.1418978 | -1.1081558 | 0.9615445 |
| Least  | Views on nonorganization content that is hateful | -9         | -0.1156899 | 0.1636972 | -1.3095210 | 1.0781412 |
| Least  | Views on nonorganization content that is hateful | -8         | -0.0801722 | 0.1860713 | -1.4371762 | 1.2768319 |
| Least  | Views on nonorganization content that is hateful | -7         | -0.1268765 | 0.0870201 | -0.7615076 | 0.5077547 |
| Least  | Views on nonorganization content that is hateful | -6         | -0.2595886 | 0.1904102 | -1.6482356 | 1.1290585 |
| Least  | Views on nonorganization content that is hateful | -5         | -0.3111008 | 0.1727215 | -1.5707455 | 0.9485440 |
| Least  | Views on nonorganization content that is hateful | -4         | -0.1868328 | 0.2328852 | -1.8852471 | 1.5115815 |
| Least  | Views on nonorganization content that is hateful | -3         | -0.6578203 | 0.4523398 | -3.9567004 | 2.6410598 |
| Least  | Views on nonorganization content that is hateful | -2         | 0.1814642  | 0.1276787 | -0.7496868 | 1.1126153 |
| Least  | Views on nonorganization content that is hateful | -1         | -0.0178541 | 0.4766242 | -3.4938381 | 3.4581298 |
| Least  | Views on nonorganization content that is hateful | 0          | 0.4247612  | 0.2748497 | -1.5796967 | 2.4292190 |
| Least  | Views on nonorganization content that is hateful | 1          | 0.7097692  | 0.3729593 | -2.0101944 | 3.4297329 |
| Least  | Views on nonorganization content that is hateful | 2          | 0.6318330  | 0.4856690 | -2.9101144 | 4.1737804 |
| Least  | Views on nonorganization content that is hateful | 3          | 0.7122143  | 0.5856354 | -3.5587805 | 4.9832092 |
| Least  | Views on nonorganization content that is hateful | 4          | 0.6093433  | 0.6414158 | -4.0684534 | 5.2871400 |

|       |                                                  |    |            |           |             |            |
|-------|--------------------------------------------------|----|------------|-----------|-------------|------------|
| Least | Views on nonorganization content that is hateful | 5  | 0.6173791  | 0.5316312 | -3.2597669  | 4.4945251  |
| Least | Views on nonorganization content that is hateful | 6  | 0.7305591  | 0.6424051 | -3.9544529  | 5.4155711  |
| Least | Views on nonorganization content that is hateful | 7  | 0.7175655  | 0.8476930 | -5.4645953  | 6.8997263  |
| Least | Views on nonorganization content that is hateful | 8  | 0.5465023  | 0.7010228 | -4.5660039  | 5.6590084  |
| Least | Views on nonorganization content that is hateful | 9  | 0.6388889  | 0.7164568 | -4.5861761  | 5.8639539  |
| Least | Views on nonorganization content that is hateful | 10 | 0.8477582  | 0.9189073 | -5.8537631  | 7.5492794  |
| Least | Views on nonorganization content that is hateful | 11 | 0.8395328  | 0.8868639 | -5.6282986  | 7.3073641  |
| Least | Views on nonorganization content that is hateful | 12 | 0.7686375  | 0.9028454 | -5.8157457  | 7.3530207  |
| Least | Views on nonorganization content that is hateful | 13 | 0.5706792  | 0.7297330 | -4.7512083  | 5.8925667  |
| Least | Views on nonorganization content that is hateful | 14 | 0.8986756  | 0.9362450 | -5.9292884  | 7.7266397  |
| Least | Views on nonorganization content that is hateful | 15 | 1.1574472  | 1.3243092 | -8.5006392  | 10.8155335 |
| Least | Views on nonorganization content that is hateful | 16 | 1.0587553  | 2.4147915 | -16.5521357 | 18.6696464 |
| Least | Views on nonorganization content that is hateful | 17 | 1.0600162  | 3.2008067 | -22.2832242 | 24.4032566 |
| Least | Views on nonorganization content that is hateful | 18 | 1.1369851  | 1.8226133 | -12.1551957 | 14.4291658 |
| Least | Views on nonorganization content that is hateful | 19 | 1.0079875  | 0.3105523 | -1.2568468  | 3.2728218  |
| Least | Views on nonorganization content that is hateful | 20 | 0.6640732  | 1.3631851 | -9.2775323  | 10.6056787 |
| Least | Views on nonorganization content that is hateful | 21 | 1.0024351  | 1.5054172 | -9.9764585  | 11.9813287 |
| Least | Views on nonorganization content that is hateful | 22 | 0.9666432  | 2.6663505 | -18.4788486 | 20.4121350 |
| Least | Views on nonorganization content that is hateful | 23 | 1.0947318  | 0.8186601 | -4.8756942  | 7.0651579  |
| Least | Views on nonorganization content that is hateful | 24 | 1.2337642  | 1.5918509 | -10.3754836 | 12.8430119 |
| Least | Views on nonorganization content that is hateful | 25 | 1.1291900  | 2.7680053 | -19.0576625 | 21.3160425 |
| Least | Views on nonorganization content that is hateful | 26 | 0.8833079  | 2.6859671 | -18.7052462 | 20.4718619 |
| Least | Views on nonorganization content that is hateful | 27 | -1.4850305 | 0.0901846 | -2.1427399  | -0.8273211 |
| Least | Views on nonorganization content that is hateful | 28 | -1.4292678 | 0.3182312 | -3.7501039  | 0.8915682  |
| Least | Views on nonorganization content that is hateful | 29 | -1.5645742 | 0.3825690 | -4.3546207  | 1.2254722  |
| Least | Views on nonorganization content that is hateful | 30 | -1.8158703 | 0.9998895 | -9.1079889  | 5.4762483  |

## Hateful comments by audience members

Average effect by length of exposure (Callaway and Sant'Anna)

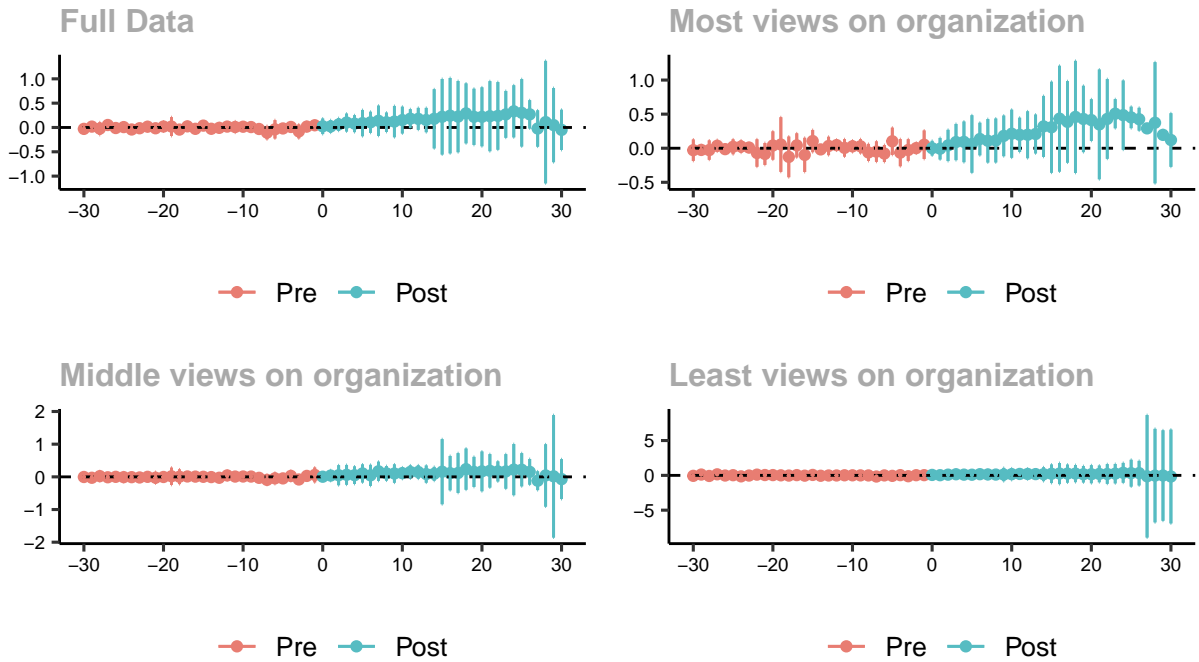

Long timeframe with sampled control groups

| sample | outcome                              | event.time | estimate   | std.error  | conf.low   | conf.high |
|--------|--------------------------------------|------------|------------|------------|------------|-----------|
| Full   | Hateful comments by audience members | -30        | -0.0289174 | 0.0314492  | -0.1046263 | 0.0467916 |
| Full   | Hateful comments by audience members | -29        | 0.0180176  | 0.0239475  | -0.0396321 | 0.0756674 |
| Full   | Hateful comments by audience members | -28        | -0.0233803 | 0.0541381  | -0.1537091 | 0.1069486 |
| Full   | Hateful comments by audience members | -27        | 0.0505600  | 0.0265332  | -0.0133145 | 0.1144345 |
| Full   | Hateful comments by audience members | -26        | -0.0110180 | 0.0199087  | -0.0589451 | 0.0369090 |
| Full   | Hateful comments by audience members | -25        | 0.0078226  | 0.01110240 | -0.0187160 | 0.0343611 |
| Full   | Hateful comments by audience members | -24        | -0.0410848 | 0.0344426  | -0.1239999 | 0.0418304 |
| Full   | Hateful comments by audience members | -23        | -0.0155055 | 0.0176673  | -0.0580367 | 0.0270257 |
| Full   | Hateful comments by audience members | -22        | 0.0163652  | 0.0370832  | -0.0729067 | 0.1056371 |
| Full   | Hateful comments by audience members | -21        | -0.0161210 | 0.0219294  | -0.0689125 | 0.0366705 |
| Full   | Hateful comments by audience members | -20        | 0.0197799  | 0.0424377  | -0.0823821 | 0.1219420 |
| Full   | Hateful comments by audience members | -19        | 0.0187807  | 0.0804828  | -0.1749688 | 0.2125302 |
| Full   | Hateful comments by audience members | -18        | -0.0428122 | 0.0317430  | -0.1192283 | 0.0336039 |
| Full   | Hateful comments by audience members | -17        | 0.0234145  | 0.0363429  | -0.0640751 | 0.1109042 |
| Full   | Hateful comments by audience members | -16        | -0.0275219 | 0.0280117  | -0.0949556 | 0.0399118 |
| Full   | Hateful comments by audience members | -15        | 0.0382088  | 0.0263734  | -0.0252810 | 0.1016985 |
| Full   | Hateful comments by audience members | -14        | -0.0264414 | 0.0368216  | -0.1150834 | 0.0622007 |
| Full   | Hateful comments by audience members | -13        | -0.0075337 | 0.0400246  | -0.1038864 | 0.0888191 |
| Full   | Hateful comments by audience members | -12        | 0.0183811  | 0.0322975  | -0.0593701 | 0.0961322 |



|      |                                      |     |            |           |            |           |
|------|--------------------------------------|-----|------------|-----------|------------|-----------|
| Full | Hateful comments by audience members | -11 | 0.0098401  | 0.0485464 | -0.1070275 | 0.1267077 |
| Full | Hateful comments by audience members | -10 | 0.0156315  | 0.0334289 | -0.0648433 | 0.0961063 |
| Full | Hateful comments by audience members | -9  | 0.0083860  | 0.0168741 | -0.0322357 | 0.0490077 |
| Full | Hateful comments by audience members | -8  | -0.0309071 | 0.0214719 | -0.0825974 | 0.0207832 |
| Full | Hateful comments by audience members | -7  | -0.1052829 | 0.0572622 | -0.2431326 | 0.0325668 |
| Full | Hateful comments by audience members | -6  | -0.0378657 | 0.0783105 | -0.2263856 | 0.1506542 |
| Full | Hateful comments by audience members | -5  | -0.0200510 | 0.0255011 | -0.0814409 | 0.0413390 |
| Full | Hateful comments by audience members | -4  | 0.0110389  | 0.0269533 | -0.0538468 | 0.0759247 |
| Full | Hateful comments by audience members | -3  | -0.0800503 | 0.0596824 | -0.2237261 | 0.0636255 |
| Full | Hateful comments by audience members | -2  | 0.0185058  | 0.0395762 | -0.0767675 | 0.1137791 |
| Full | Hateful comments by audience members | -1  | 0.0457936  | 0.0379958 | -0.0456753 | 0.1372625 |
| Full | Hateful comments by audience members | 0   | 0.0242963  | 0.0662365 | -0.1351575 | 0.1837501 |
| Full | Hateful comments by audience members | 1   | 0.0221233  | 0.0535798 | -0.1068614 | 0.1511080 |
| Full | Hateful comments by audience members | 2   | 0.0625258  | 0.0541695 | -0.0678785 | 0.1929301 |
| Full | Hateful comments by audience members | 3   | 0.1016340  | 0.0763607 | -0.0821922 | 0.2854602 |
| Full | Hateful comments by audience members | 4   | 0.0784775  | 0.0721416 | -0.0951920 | 0.2521470 |
| Full | Hateful comments by audience members | 5   | 0.0905501  | 0.1120939 | -0.1792981 | 0.3603983 |
| Full | Hateful comments by audience members | 6   | 0.1064670  | 0.0899656 | -0.1101108 | 0.3230448 |
| Full | Hateful comments by audience members | 7   | 0.1382591  | 0.1289445 | -0.1721541 | 0.4486723 |
| Full | Hateful comments by audience members | 8   | 0.1073552  | 0.0825872 | -0.0914603 | 0.3061708 |
| Full | Hateful comments by audience members | 9   | 0.1213918  | 0.1334051 | -0.1997596 | 0.4425433 |
| Full | Hateful comments by audience members | 10  | 0.1522568  | 0.1142712 | -0.1228330 | 0.4273465 |
| Full | Hateful comments by audience members | 11  | 0.1807259  | 0.0811303 | -0.0145822 | 0.3760340 |
| Full | Hateful comments by audience members | 12  | 0.1776719  | 0.0936277 | -0.0477218 | 0.4030657 |
| Full | Hateful comments by audience members | 13  | 0.1527510  | 0.1038158 | -0.0971689 | 0.4026709 |
| Full | Hateful comments by audience members | 14  | 0.1779573  | 0.2523974 | -0.4296491 | 0.7855637 |
| Full | Hateful comments by audience members | 15  | 0.2203928  | 0.3224667 | -0.5558942 | 0.9966797 |
| Full | Hateful comments by audience members | 16  | 0.2427474  | 0.3218426 | -0.5320372 | 1.0175321 |
| Full | Hateful comments by audience members | 17  | 0.2234109  | 0.3041810 | -0.5088562 | 0.9556779 |
| Full | Hateful comments by audience members | 18  | 0.2897974  | 0.2558647 | -0.3261560 | 0.9057508 |
| Full | Hateful comments by audience members | 19  | 0.2192271  | 0.2399388 | -0.3583871 | 0.7968414 |
| Full | Hateful comments by audience members | 20  | 0.2193467  | 0.2515728 | -0.3862745 | 0.8249680 |
| Full | Hateful comments by audience members | 21  | 0.2319685  | 0.2990861 | -0.4880335 | 0.9519705 |
| Full | Hateful comments by audience members | 22  | 0.2382440  | 0.2886119 | -0.4565430 | 0.9330311 |
| Full | Hateful comments by audience members | 23  | 0.2697794  | 0.1997548 | -0.2110984 | 0.7506571 |
| Full | Hateful comments by audience members | 24  | 0.3323587  | 0.2222371 | -0.2026416 | 0.8673590 |
| Full | Hateful comments by audience members | 25  | 0.3014303  | 0.2876433 | -0.3910250 | 0.9938856 |
| Full | Hateful comments by audience members | 26  | 0.2702938  | 0.1206442 | -0.0201379 | 0.5607255 |
| Full | Hateful comments by audience members | 27  | -0.0209162 | 0.1550108 | -0.3940799 | 0.3522474 |
| Full | Hateful comments by audience members | 28  | 0.1107772  | 0.5227811 | -1.1477347 | 1.3692890 |
| Full | Hateful comments by audience members | 29  | 0.0492748  | 0.3167494 | -0.7132487 | 0.8117983 |

|      |                                      |    |            |           |            |           |
|------|--------------------------------------|----|------------|-----------|------------|-----------|
| Full | Hateful comments by audience members | 30 | -0.0492651 | 0.1718090 | -0.4628678 | 0.3643375 |
|------|--------------------------------------|----|------------|-----------|------------|-----------|

| sample | outcome                              | event.time | estimate   | std.error | conf.low   | conf.high |
|--------|--------------------------------------|------------|------------|-----------|------------|-----------|
| Most   | Hateful comments by audience members | -30        | -0.0288613 | 0.0612875 | -0.1857019 | 0.1279792 |
| Most   | Hateful comments by audience members | -29        | -0.0247546 | 0.0270633 | -0.0940120 | 0.0445029 |
| Most   | Hateful comments by audience members | -28        | -0.0274742 | 0.0553711 | -0.1691741 | 0.1142257 |
| Most   | Hateful comments by audience members | -27        | 0.0358381  | 0.0334678 | -0.0498092 | 0.1214854 |
| Most   | Hateful comments by audience members | -26        | -0.0134820 | 0.0234244 | -0.0734273 | 0.0464633 |
| Most   | Hateful comments by audience members | -25        | 0.0208550  | 0.0427585 | -0.0885681 | 0.1302781 |
| Most   | Hateful comments by audience members | -24        | 0.0242877  | 0.0353812 | -0.0662560 | 0.1148314 |
| Most   | Hateful comments by audience members | -23        | 0.0097829  | 0.0257189 | -0.0560343 | 0.0756001 |
| Most   | Hateful comments by audience members | -22        | -0.0702457 | 0.0785308 | -0.2712133 | 0.1307219 |
| Most   | Hateful comments by audience members | -21        | -0.0840319 | 0.0627649 | -0.2446532 | 0.0765894 |
| Most   | Hateful comments by audience members | -20        | 0.0397728  | 0.0811187 | -0.1678176 | 0.2473632 |
| Most   | Hateful comments by audience members | -19        | 0.0540791  | 0.1564523 | -0.3462969 | 0.4544551 |
| Most   | Hateful comments by audience members | -18        | -0.1271985 | 0.1165075 | -0.4253521 | 0.1709551 |
| Most   | Hateful comments by audience members | -17        | 0.0415820  | 0.0690741 | -0.1351850 | 0.2183490 |
| Most   | Hateful comments by audience members | -16        | -0.0979871 | 0.0979640 | -0.3486863 | 0.1527120 |
| Most   | Hateful comments by audience members | -15        | 0.1050976  | 0.0637059 | -0.0579317 | 0.2681269 |
| Most   | Hateful comments by audience members | -14        | -0.0175757 | 0.0229262 | -0.0762460 | 0.0410947 |
| Most   | Hateful comments by audience members | -13        | 0.0329496  | 0.0526936 | -0.1018981 | 0.1677974 |
| Most   | Hateful comments by audience members | -12        | 0.0454179  | 0.0314726 | -0.0351235 | 0.1259592 |
| Most   | Hateful comments by audience members | -11        | 0.0048038  | 0.0499445 | -0.1230088 | 0.1326164 |
| Most   | Hateful comments by audience members | -10        | 0.0284546  | 0.0335128 | -0.0573079 | 0.1142171 |
| Most   | Hateful comments by audience members | -9         | 0.0287954  | 0.0406502 | -0.0752321 | 0.1328230 |
| Most   | Hateful comments by audience members | -8         | -0.0618800 | 0.0489997 | -0.1872747 | 0.0635147 |
| Most   | Hateful comments by audience members | -7         | -0.0496131 | 0.0584899 | -0.1992942 | 0.1000679 |
| Most   | Hateful comments by audience members | -6         | -0.0776044 | 0.0486558 | -0.2021191 | 0.0469102 |
| Most   | Hateful comments by audience members | -5         | 0.1019770  | 0.0779105 | -0.0974032 | 0.3013571 |
| Most   | Hateful comments by audience members | -4         | -0.0653540 | 0.0776924 | -0.2641761 | 0.1334682 |
| Most   | Hateful comments by audience members | -3         | -0.0266167 | 0.0618583 | -0.1849180 | 0.1316845 |
| Most   | Hateful comments by audience members | -2         | 0.0014351  | 0.0315001 | -0.0791767 | 0.0820468 |
| Most   | Hateful comments by audience members | -1         | 0.0511068  | 0.0816636 | -0.1578780 | 0.2600916 |
| Most   | Hateful comments by audience members | 0          | 0.0004692  | 0.0419555 | -0.1068988 | 0.1078373 |
| Most   | Hateful comments by audience members | 1          | -0.0069836 | 0.0617656 | -0.1650476 | 0.1510805 |
| Most   | Hateful comments by audience members | 2          | 0.0408908  | 0.0894948 | -0.1881348 | 0.2699164 |
| Most   | Hateful comments by audience members | 3          | 0.0905768  | 0.1036869 | -0.1747677 | 0.3559213 |
| Most   | Hateful comments by audience members | 4          | 0.0931323  | 0.1165732 | -0.2051894 | 0.3914541 |
| Most   | Hateful comments by audience members | 5          | 0.0622541  | 0.1646764 | -0.3591681 | 0.4836764 |
| Most   | Hateful comments by audience members | 6          | 0.1349677  | 0.0933549 | -0.1039362 | 0.3738715 |
| Most   | Hateful comments by audience members | 7          | 0.1092327  | 0.1244080 | -0.2091389 | 0.4276043 |

|      |                                      |    |           |           |            |           |
|------|--------------------------------------|----|-----------|-----------|------------|-----------|
| Most | Hateful comments by audience members | 8  | 0.1135330 | 0.1257735 | -0.2083333 | 0.4353992 |
| Most | Hateful comments by audience members | 9  | 0.1808123 | 0.1163912 | -0.1170436 | 0.4786682 |
| Most | Hateful comments by audience members | 10 | 0.2131746 | 0.1376553 | -0.1390982 | 0.5654474 |
| Most | Hateful comments by audience members | 11 | 0.1961634 | 0.0980263 | -0.0546950 | 0.4470217 |
| Most | Hateful comments by audience members | 12 | 0.1974124 | 0.1343393 | -0.1463745 | 0.5411994 |
| Most | Hateful comments by audience members | 13 | 0.2086881 | 0.1112654 | -0.0760504 | 0.4934266 |
| Most | Hateful comments by audience members | 14 | 0.3201240 | 0.1747018 | -0.1269543 | 0.7672024 |
| Most | Hateful comments by audience members | 15 | 0.3078876 | 0.2606551 | -0.3591530 | 0.9749283 |
| Most | Hateful comments by audience members | 16 | 0.4334710 | 0.3031894 | -0.3424191 | 1.2093610 |
| Most | Hateful comments by audience members | 17 | 0.3865876 | 0.2336113 | -0.2112456 | 0.9844208 |
| Most | Hateful comments by audience members | 18 | 0.4594357 | 0.3211568 | -0.3624346 | 1.2813060 |
| Most | Hateful comments by audience members | 19 | 0.4293814 | 0.1900762 | -0.0570413 | 0.9158042 |
| Most | Hateful comments by audience members | 20 | 0.4130662 | 0.1192053 | 0.1080086  | 0.7181237 |
| Most | Hateful comments by audience members | 21 | 0.3495645 | 0.3143800 | -0.4549633 | 1.1540924 |
| Most | Hateful comments by audience members | 22 | 0.4296563 | 0.2283138 | -0.1546201 | 1.0139327 |
| Most | Hateful comments by audience members | 23 | 0.5064296 | 0.0834122 | 0.2929699  | 0.7198893 |
| Most | Hateful comments by audience members | 24 | 0.4852589 | 0.1983070 | -0.0222272 | 0.9927449 |
| Most | Hateful comments by audience members | 25 | 0.4518920 | 0.0616045 | 0.2942404  | 0.6095436 |
| Most | Hateful comments by audience members | 26 | 0.4255028 | 0.0653190 | 0.2583455  | 0.5926601 |
| Most | Hateful comments by audience members | 27 | 0.2914080 | 0.0027349 | 0.2844091  | 0.2984070 |
| Most | Hateful comments by audience members | 28 | 0.3735811 | 0.3471056 | -0.5146947 | 1.2618569 |
| Most | Hateful comments by audience members | 29 | 0.1958127 | 0.0270658 | 0.1265489  | 0.2650765 |
| Most | Hateful comments by audience members | 30 | 0.1203320 | 0.1534882 | -0.2724586 | 0.5131225 |

| sample | outcome                              | event.time | estimate   | std.error | conf.low   | conf.high |
|--------|--------------------------------------|------------|------------|-----------|------------|-----------|
| Middle | Hateful comments by audience members | -30        | -0.0038988 | 0.0381813 | -0.1061554 | 0.0983579 |
| Middle | Hateful comments by audience members | -29        | -0.0274379 | 0.0321845 | -0.1136340 | 0.0587582 |
| Middle | Hateful comments by audience members | -28        | 0.0222235  | 0.0565859 | -0.1293241 | 0.1737710 |
| Middle | Hateful comments by audience members | -27        | -0.0125615 | 0.0271347 | -0.0852331 | 0.0601102 |
| Middle | Hateful comments by audience members | -26        | 0.0010886  | 0.0288383 | -0.0761456 | 0.0783229 |
| Middle | Hateful comments by audience members | -25        | -0.0090095 | 0.0553815 | -0.1573315 | 0.1393125 |
| Middle | Hateful comments by audience members | -24        | -0.0097245 | 0.0258628 | -0.0789898 | 0.0595408 |
| Middle | Hateful comments by audience members | -23        | -0.0183050 | 0.0178598 | -0.0661369 | 0.0295269 |
| Middle | Hateful comments by audience members | -22        | 0.0010225  | 0.0283130 | -0.0748049 | 0.0768500 |
| Middle | Hateful comments by audience members | -21        | -0.0262582 | 0.0659638 | -0.2029215 | 0.1504051 |
| Middle | Hateful comments by audience members | -20        | -0.0036487 | 0.0424313 | -0.1172875 | 0.1099901 |
| Middle | Hateful comments by audience members | -19        | 0.0176004  | 0.0980023 | -0.2448680 | 0.2800687 |
| Middle | Hateful comments by audience members | -18        | 0.0032444  | 0.0838530 | -0.2213296 | 0.2278183 |
| Middle | Hateful comments by audience members | -17        | 0.0123556  | 0.0274633 | -0.0611961 | 0.0859072 |
| Middle | Hateful comments by audience members | -16        | 0.0074732  | 0.0214767 | -0.0500454 | 0.0649917 |
| Middle | Hateful comments by audience members | -15        | 0.0017915  | 0.0455993 | -0.1203319 | 0.1239149 |

|        |                                      |     |            |           |            |           |
|--------|--------------------------------------|-----|------------|-----------|------------|-----------|
| Middle | Hateful comments by audience members | -14 | -0.0068769 | 0.0225402 | -0.0672438 | 0.0534901 |
| Middle | Hateful comments by audience members | -13 | -0.0276814 | 0.0486223 | -0.1579010 | 0.1025383 |
| Middle | Hateful comments by audience members | -12 | 0.0432839  | 0.0539033 | -0.1010791 | 0.1876469 |
| Middle | Hateful comments by audience members | -11 | 0.0090365  | 0.0432308 | -0.1067437 | 0.1248167 |
| Middle | Hateful comments by audience members | -10 | 0.0110684  | 0.0230199 | -0.0505831 | 0.0727199 |
| Middle | Hateful comments by audience members | -9  | 0.0090397  | 0.0255550 | -0.0594013 | 0.0774808 |
| Middle | Hateful comments by audience members | -8  | -0.0303132 | 0.0285840 | -0.1068664 | 0.0462401 |
| Middle | Hateful comments by audience members | -7  | -0.0925278 | 0.0572680 | -0.2459021 | 0.0608465 |
| Middle | Hateful comments by audience members | -6  | -0.0459081 | 0.0645296 | -0.2187304 | 0.1269143 |
| Middle | Hateful comments by audience members | -5  | -0.0469034 | 0.0382438 | -0.1493273 | 0.0555204 |
| Middle | Hateful comments by audience members | -4  | 0.0283829  | 0.0587575 | -0.1289806 | 0.1857465 |
| Middle | Hateful comments by audience members | -3  | -0.0803053 | 0.0405752 | -0.1889731 | 0.0283625 |
| Middle | Hateful comments by audience members | -2  | 0.0285244  | 0.0416609 | -0.0830512 | 0.1401000 |
| Middle | Hateful comments by audience members | -1  | 0.0586052  | 0.0845078 | -0.1677224 | 0.2849328 |
| Middle | Hateful comments by audience members | 0   | 0.0041874  | 0.0401539 | -0.1033521 | 0.1117270 |
| Middle | Hateful comments by audience members | 1   | 0.0392861  | 0.0614482 | -0.1252834 | 0.2038556 |
| Middle | Hateful comments by audience members | 2   | 0.0496862  | 0.1140468 | -0.2557522 | 0.3551246 |
| Middle | Hateful comments by audience members | 3   | 0.0623322  | 0.1128543 | -0.2399125 | 0.3645768 |
| Middle | Hateful comments by audience members | 4   | 0.0504121  | 0.1003610 | -0.2183733 | 0.3191975 |
| Middle | Hateful comments by audience members | 5   | 0.1045752  | 0.1031765 | -0.1717507 | 0.3809010 |
| Middle | Hateful comments by audience members | 6   | 0.0459393  | 0.1200204 | -0.2754975 | 0.3673760 |
| Middle | Hateful comments by audience members | 7   | 0.1705285  | 0.1093344 | -0.1222893 | 0.4633463 |
| Middle | Hateful comments by audience members | 8   | 0.1077619  | 0.0832599 | -0.1152234 | 0.3307472 |
| Middle | Hateful comments by audience members | 9   | 0.1018206  | 0.1045549 | -0.1781967 | 0.3818380 |
| Middle | Hateful comments by audience members | 10  | 0.1130999  | 0.0661582 | -0.0640840 | 0.2902838 |
| Middle | Hateful comments by audience members | 11  | 0.1504599  | 0.0751134 | -0.0507078 | 0.3516275 |
| Middle | Hateful comments by audience members | 12  | 0.1482517  | 0.0768021 | -0.0574384 | 0.3539419 |
| Middle | Hateful comments by audience members | 13  | 0.0848965  | 0.0979491 | -0.1774294 | 0.3472224 |
| Middle | Hateful comments by audience members | 14  | 0.0921543  | 0.0794025 | -0.1205004 | 0.3048090 |
| Middle | Hateful comments by audience members | 15  | 0.1577759  | 0.3715984 | -0.8374333 | 1.1529852 |
| Middle | Hateful comments by audience members | 16  | 0.1136778  | 0.1962423 | -0.4118953 | 0.6392510 |
| Middle | Hateful comments by audience members | 17  | 0.1172197  | 0.2270436 | -0.4908451 | 0.7252845 |
| Middle | Hateful comments by audience members | 18  | 0.2360495  | 0.2352867 | -0.3940917 | 0.8661908 |
| Middle | Hateful comments by audience members | 19  | 0.1518625  | 0.1715877 | -0.3076811 | 0.6114061 |
| Middle | Hateful comments by audience members | 20  | 0.1678500  | 0.2270177 | -0.4401453 | 0.7758453 |
| Middle | Hateful comments by audience members | 21  | 0.1843496  | 0.1910927 | -0.3274320 | 0.6961312 |
| Middle | Hateful comments by audience members | 22  | 0.1661815  | 0.1146237 | -0.1408019 | 0.4731649 |
| Middle | Hateful comments by audience members | 23  | 0.1666788  | 0.1969558 | -0.3608054 | 0.6941630 |
| Middle | Hateful comments by audience members | 24  | 0.2216028  | 0.2921089 | -0.5607188 | 1.0039245 |
| Middle | Hateful comments by audience members | 25  | 0.2171982  | 0.1892497 | -0.2896476 | 0.7240440 |
| Middle | Hateful comments by audience members | 26  | 0.1538274  | 0.1466517 | -0.2389330 | 0.5465879 |

|        |                                      |    |            |           |            |           |
|--------|--------------------------------------|----|------------|-----------|------------|-----------|
| Middle | Hateful comments by audience members | 27 | -0.1186681 | 0.1072229 | -0.4058307 | 0.1684946 |
| Middle | Hateful comments by audience members | 28 | 0.0429694  | 0.3558852 | -0.9101571 | 0.9960958 |
| Middle | Hateful comments by audience members | 29 | 0.0171819  | 0.6994934 | -1.8561908 | 1.8905546 |
| Middle | Hateful comments by audience members | 30 | -0.0690752 | 0.2274385 | -0.6781975 | 0.5400471 |

| sample | outcome                              | event.time | estimate   | std.error | conf.low   | conf.high |
|--------|--------------------------------------|------------|------------|-----------|------------|-----------|
| Least  | Hateful comments by audience members | -30        | -0.0682579 | 0.0646271 | -0.2330178 | 0.0965020 |
| Least  | Hateful comments by audience members | -29        | 0.1149054  | 0.0588567 | -0.0351436 | 0.2649544 |
| Least  | Hateful comments by audience members | -28        | -0.0861085 | 0.0953705 | -0.3292453 | 0.1570283 |
| Least  | Hateful comments by audience members | -27        | 0.1474909  | 0.0414922 | 0.0417109  | 0.2532708 |
| Least  | Hateful comments by audience members | -26        | -0.0247494 | 0.0839120 | -0.2386741 | 0.1891753 |
| Least  | Hateful comments by audience members | -25        | 0.0236540  | 0.0606993 | -0.1310923 | 0.1784004 |
| Least  | Hateful comments by audience members | -24        | -0.1402574 | 0.1015522 | -0.3991539 | 0.1186391 |
| Least  | Hateful comments by audience members | -23        | -0.0267994 | 0.0252072 | -0.0910624 | 0.0374636 |
| Least  | Hateful comments by audience members | -22        | 0.1040053  | 0.0619038 | -0.0538117 | 0.2618223 |
| Least  | Hateful comments by audience members | -21        | 0.0449858  | 0.1003842 | -0.2109331 | 0.3009047 |
| Least  | Hateful comments by audience members | -20        | 0.0372477  | 0.0966326 | -0.2091068 | 0.2836022 |
| Least  | Hateful comments by audience members | -19        | 0.0026906  | 0.1341889 | -0.3394097 | 0.3447909 |
| Least  | Hateful comments by audience members | -18        | -0.0301051 | 0.0873773 | -0.2528641 | 0.1926540 |
| Least  | Hateful comments by audience members | -17        | 0.0363402  | 0.0476120 | -0.0850414 | 0.1577218 |
| Least  | Hateful comments by audience members | -16        | -0.0438475 | 0.0426301 | -0.1525283 | 0.0648334 |
| Least  | Hateful comments by audience members | -15        | 0.0595390  | 0.0576871 | -0.0875280 | 0.2066061 |
| Least  | Hateful comments by audience members | -14        | -0.0569095 | 0.0775993 | -0.2547407 | 0.1409217 |
| Least  | Hateful comments by audience members | -13        | -0.0198110 | 0.1003527 | -0.2756494 | 0.2360274 |
| Least  | Hateful comments by audience members | -12        | -0.0137792 | 0.0706051 | -0.1937794 | 0.1662211 |
| Least  | Hateful comments by audience members | -11        | 0.0114299  | 0.0572637 | -0.1345576 | 0.1574175 |
| Least  | Hateful comments by audience members | -10        | 0.0093059  | 0.0964486 | -0.2365795 | 0.2551913 |
| Least  | Hateful comments by audience members | -9         | -0.0027020 | 0.0633167 | -0.1641212 | 0.1587173 |
| Least  | Hateful comments by audience members | -8         | -0.0102232 | 0.0868701 | -0.2316892 | 0.2112428 |
| Least  | Hateful comments by audience members | -7         | -0.1637210 | 0.0809254 | -0.3700318 | 0.0425897 |
| Least  | Hateful comments by audience members | -6         | -0.0064121 | 0.1325821 | -0.3444160 | 0.3315918 |
| Least  | Hateful comments by audience members | -5         | -0.0739547 | 0.0507798 | -0.2034123 | 0.0555030 |
| Least  | Hateful comments by audience members | -4         | 0.0302607  | 0.0869719 | -0.1914649 | 0.2519863 |
| Least  | Hateful comments by audience members | -3         | -0.1217855 | 0.1523457 | -0.5101747 | 0.2666036 |
| Least  | Hateful comments by audience members | -2         | 0.0245657  | 0.2067176 | -0.5024386 | 0.5515700 |
| Least  | Hateful comments by audience members | -1         | 0.0288192  | 0.0969320 | -0.2182986 | 0.2759370 |
| Least  | Hateful comments by audience members | 0          | 0.0610021  | 0.2072382 | -0.4673294 | 0.5893336 |
| Least  | Hateful comments by audience members | 1          | 0.0246700  | 0.1065393 | -0.2469405 | 0.2962805 |
| Least  | Hateful comments by audience members | 2          | 0.0984401  | 0.1628319 | -0.3166826 | 0.5135627 |
| Least  | Hateful comments by audience members | 3          | 0.1583868  | 0.2384338 | -0.4494747 | 0.7662482 |
| Least  | Hateful comments by audience members | 4          | 0.1017113  | 0.1658208 | -0.3210312 | 0.5244538 |

|       |                                      |    |            |           |            |           |
|-------|--------------------------------------|----|------------|-----------|------------|-----------|
| Least | Hateful comments by audience members | 5  | 0.0904864  | 0.1304678 | -0.2421272 | 0.4231000 |
| Least | Hateful comments by audience members | 6  | 0.1675827  | 0.1893663 | -0.3151865 | 0.6503519 |
| Least | Hateful comments by audience members | 7  | 0.1320110  | 0.2500595 | -0.5054889 | 0.7695110 |
| Least | Hateful comments by audience members | 8  | 0.1146938  | 0.1738638 | -0.3285534 | 0.5579410 |
| Least | Hateful comments by audience members | 9  | 0.1167078  | 0.3738056 | -0.8362695 | 1.0696851 |
| Least | Hateful comments by audience members | 10 | 0.1697073  | 0.3279484 | -0.6663621 | 1.0057767 |
| Least | Hateful comments by audience members | 11 | 0.2023134  | 0.1267897 | -0.1209235 | 0.5255502 |
| Least | Hateful comments by audience members | 12 | 0.1994755  | 0.3036539 | -0.5746576 | 0.9736087 |
| Least | Hateful comments by audience members | 13 | 0.1816195  | 0.2369923 | -0.4225669 | 0.7858059 |
| Least | Hateful comments by audience members | 14 | 0.1671488  | 0.3904963 | -0.8283797 | 1.1626773 |
| Least | Hateful comments by audience members | 15 | 0.2253692  | 0.5213338 | -1.1037154 | 1.5544538 |
| Least | Hateful comments by audience members | 16 | 0.2611294  | 0.5942170 | -1.2537633 | 1.7760221 |
| Least | Hateful comments by audience members | 17 | 0.2512985  | 0.5059632 | -1.0386006 | 1.5411976 |
| Least | Hateful comments by audience members | 18 | 0.2549580  | 0.4821058 | -0.9741191 | 1.4840351 |
| Least | Hateful comments by audience members | 19 | 0.1611083  | 0.4617998 | -1.0162008 | 1.3384175 |
| Least | Hateful comments by audience members | 20 | 0.1625136  | 0.5066267 | -1.1290770 | 1.4541041 |
| Least | Hateful comments by audience members | 21 | 0.2081670  | 0.4681893 | -0.9854315 | 1.4017655 |
| Least | Hateful comments by audience members | 22 | 0.2010400  | 0.5531928 | -1.2092659 | 1.6113458 |
| Least | Hateful comments by audience members | 23 | 0.2439926  | 0.5456599 | -1.1471090 | 1.6350941 |
| Least | Hateful comments by audience members | 24 | 0.3672804  | 0.5571002 | -1.0529869 | 1.7875477 |
| Least | Hateful comments by audience members | 25 | 0.3148917  | 0.7544200 | -1.6084212 | 2.2382047 |
| Least | Hateful comments by audience members | 26 | 0.3164852  | 0.6905090 | -1.4438935 | 2.0768640 |
| Least | Hateful comments by audience members | 27 | -0.1341520 | 3.4478606 | -8.9241036 | 8.6557995 |
| Least | Hateful comments by audience members | 28 | -0.0328365 | 2.6323811 | -6.7438103 | 6.6781374 |
| Least | Hateful comments by audience members | 29 | -0.0226299 | 2.5466596 | -6.5150661 | 6.4698062 |
| Least | Hateful comments by audience members | 30 | -0.1637395 | 2.6401916 | -6.8946253 | 6.5671464 |

## Hateful comments/total comments

Average effect by length of exposure (Callaway and Sant'Anna)

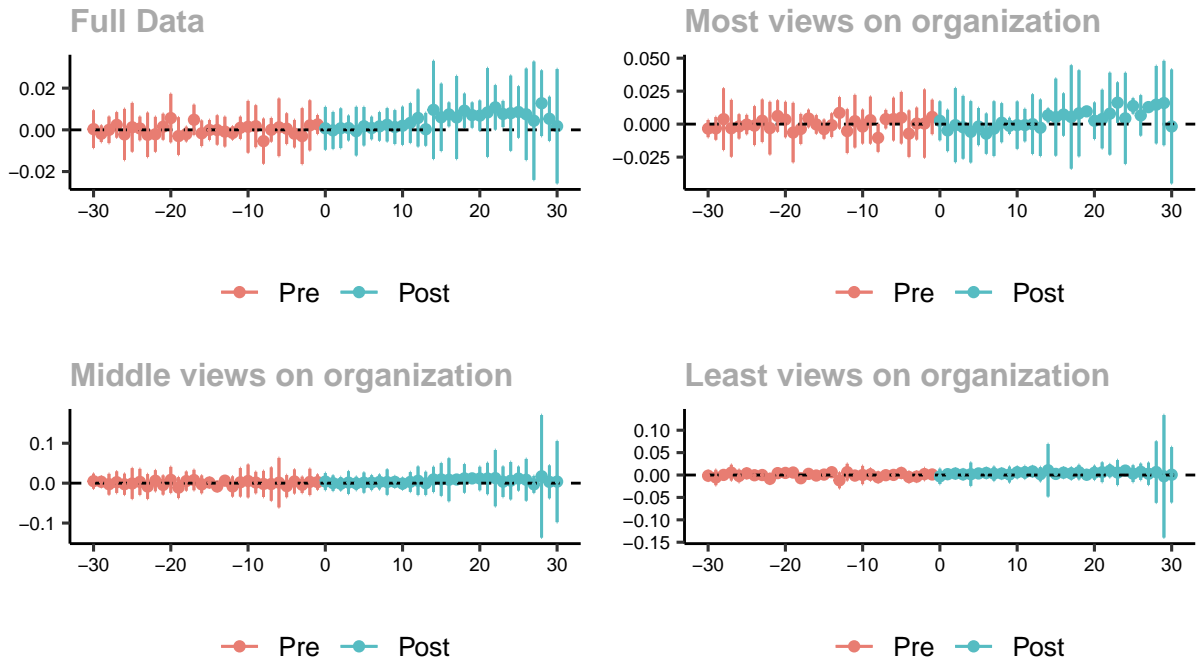

Long timeframe with sampled control groups

| sample | outcome                         | event.time | estimate   | std.error | conf.low   | conf.high |
|--------|---------------------------------|------------|------------|-----------|------------|-----------|
| Full   | Hateful comments/total comments | -30        | 0.0003427  | 0.0040921 | -0.0086376 | 0.0093230 |
| Full   | Hateful comments/total comments | -29        | -0.0018602 | 0.0018098 | -0.0058320 | 0.0021115 |
| Full   | Hateful comments/total comments | -28        | 0.0000053  | 0.0028866 | -0.0063294 | 0.0063401 |
| Full   | Hateful comments/total comments | -27        | 0.0023820  | 0.0027672 | -0.0036909 | 0.0084549 |
| Full   | Hateful comments/total comments | -26        | -0.0022088 | 0.0055796 | -0.0144536 | 0.0100359 |
| Full   | Hateful comments/total comments | -25        | 0.0012347  | 0.0053143 | -0.0104278 | 0.0128971 |
| Full   | Hateful comments/total comments | -24        | 0.0006642  | 0.0025672 | -0.0049696 | 0.0062980 |
| Full   | Hateful comments/total comments | -23        | -0.0023867 | 0.0048320 | -0.0129909 | 0.0082175 |
| Full   | Hateful comments/total comments | -22        | -0.0021216 | 0.0037967 | -0.0104538 | 0.0062106 |
| Full   | Hateful comments/total comments | -21        | 0.0014993  | 0.0028280 | -0.0047070 | 0.0077055 |
| Full   | Hateful comments/total comments | -20        | 0.0056503  | 0.0052858 | -0.0059498 | 0.0172503 |
| Full   | Hateful comments/total comments | -19        | -0.0029857 | 0.0040855 | -0.0119515 | 0.0059801 |
| Full   | Hateful comments/total comments | -18        | -0.0020214 | 0.0015966 | -0.0055253 | 0.0014825 |
| Full   | Hateful comments/total comments | -17        | 0.0048299  | 0.0032903 | -0.0023909 | 0.0120507 |
| Full   | Hateful comments/total comments | -16        | -0.0016476 | 0.0027814 | -0.0077516 | 0.0044563 |
| Full   | Hateful comments/total comments | -15        | -0.0000720 | 0.0021881 | -0.0048739 | 0.0047298 |
| Full   | Hateful comments/total comments | -14        | -0.0000695 | 0.0031934 | -0.0070776 | 0.0069387 |
| Full   | Hateful comments/total comments | -13        | -0.0008524 | 0.0032409 | -0.0079648 | 0.0062600 |
| Full   | Hateful comments/total comments | -12        | -0.0014916 | 0.0014273 | -0.0046240 | 0.0016408 |

|      |                                 |     |            |           |            |           |
|------|---------------------------------|-----|------------|-----------|------------|-----------|
| Full | Hateful comments/total comments | -11 | 0.0009831  | 0.0024148 | -0.0043163 | 0.0062825 |
| Full | Hateful comments/total comments | -10 | 0.0014709  | 0.0056459 | -0.0109193 | 0.0138612 |
| Full | Hateful comments/total comments | -9  | 0.0017453  | 0.0045653 | -0.0082735 | 0.0117642 |
| Full | Hateful comments/total comments | -8  | -0.0054152 | 0.0049061 | -0.0161820 | 0.0053515 |
| Full | Hateful comments/total comments | -7  | 0.0000234  | 0.0025734 | -0.0056241 | 0.0056708 |
| Full | Hateful comments/total comments | -6  | 0.0012044  | 0.0062797 | -0.0125768 | 0.0149855 |
| Full | Hateful comments/total comments | -5  | 0.0005644  | 0.0033323 | -0.0067484 | 0.0078773 |
| Full | Hateful comments/total comments | -4  | -0.0018181 | 0.0029926 | -0.0083855 | 0.0047493 |
| Full | Hateful comments/total comments | -3  | -0.0030097 | 0.0060933 | -0.0163818 | 0.0103625 |
| Full | Hateful comments/total comments | -2  | 0.0021428  | 0.0054533 | -0.0098247 | 0.0141104 |
| Full | Hateful comments/total comments | -1  | 0.0025949  | 0.0020570 | -0.0019194 | 0.0071091 |
| Full | Hateful comments/total comments | 0   | 0.0007445  | 0.0046584 | -0.0094786 | 0.0109677 |
| Full | Hateful comments/total comments | 1   | -0.0002601 | 0.0040213 | -0.0090850 | 0.0085648 |
| Full | Hateful comments/total comments | 2   | 0.0007648  | 0.0043222 | -0.0087206 | 0.0102502 |
| Full | Hateful comments/total comments | 3   | 0.0008851  | 0.0027001 | -0.0050404 | 0.0068107 |
| Full | Hateful comments/total comments | 4   | -0.0006230 | 0.0052997 | -0.0122535 | 0.0110076 |
| Full | Hateful comments/total comments | 5   | 0.0017403  | 0.0041934 | -0.0074624 | 0.0109431 |
| Full | Hateful comments/total comments | 6   | 0.0008925  | 0.0024548 | -0.0044946 | 0.0062797 |
| Full | Hateful comments/total comments | 7   | 0.0016512  | 0.0031010 | -0.0051541 | 0.0084564 |
| Full | Hateful comments/total comments | 8   | 0.0024246  | 0.0036257 | -0.0055322 | 0.0103814 |
| Full | Hateful comments/total comments | 9   | 0.0013376  | 0.0036898 | -0.0067599 | 0.0094351 |
| Full | Hateful comments/total comments | 10  | 0.0019754  | 0.0041514 | -0.0071350 | 0.0110859 |
| Full | Hateful comments/total comments | 11  | 0.0032995  | 0.0043279 | -0.0061983 | 0.0127972 |
| Full | Hateful comments/total comments | 12  | 0.0056997  | 0.0062132 | -0.0079355 | 0.0193349 |
| Full | Hateful comments/total comments | 13  | 0.0002709  | 0.0035741 | -0.0075726 | 0.0081144 |
| Full | Hateful comments/total comments | 14  | 0.0095882  | 0.0107006 | -0.0138949 | 0.0330712 |
| Full | Hateful comments/total comments | 15  | 0.0060024  | 0.0073494 | -0.0101262 | 0.0221311 |
| Full | Hateful comments/total comments | 16  | 0.0074096  | 0.0025970 | 0.0017103  | 0.0131089 |
| Full | Hateful comments/total comments | 17  | 0.0059439  | 0.0090551 | -0.0139280 | 0.0258158 |
| Full | Hateful comments/total comments | 18  | 0.0091861  | 0.0037281 | 0.0010045  | 0.0173676 |
| Full | Hateful comments/total comments | 19  | 0.0070783  | 0.0027534 | 0.0010358  | 0.0131207 |
| Full | Hateful comments/total comments | 20  | 0.0068367  | 0.0032905 | -0.0003846 | 0.0140579 |
| Full | Hateful comments/total comments | 21  | 0.0083544  | 0.0096837 | -0.0128971 | 0.0296059 |
| Full | Hateful comments/total comments | 22  | 0.0107810  | 0.0048421 | 0.0001547  | 0.0214072 |
| Full | Hateful comments/total comments | 23  | 0.0076059  | 0.0028519 | 0.0013473  | 0.0138646 |
| Full | Hateful comments/total comments | 24  | 0.0079898  | 0.0081906 | -0.0099850 | 0.0259645 |
| Full | Hateful comments/total comments | 25  | 0.0085647  | 0.0056019 | -0.0037291 | 0.0208584 |
| Full | Hateful comments/total comments | 26  | 0.0074711  | 0.0099761 | -0.0144221 | 0.0293643 |
| Full | Hateful comments/total comments | 27  | 0.0043665  | 0.0129199 | -0.0239871 | 0.0327201 |
| Full | Hateful comments/total comments | 28  | 0.0127499  | 0.0071600 | -0.0029631 | 0.0284629 |
| Full | Hateful comments/total comments | 29  | 0.0053159  | 0.0048047 | -0.0052282 | 0.0158601 |



|      |                                 |    |           |           |            |           |
|------|---------------------------------|----|-----------|-----------|------------|-----------|
| Full | Hateful comments/total comments | 30 | 0.0017499 | 0.0124779 | -0.0256336 | 0.0291334 |
|------|---------------------------------|----|-----------|-----------|------------|-----------|

| sample | outcome                         | event.time | estimate   | std.error | conf.low   | conf.high |
|--------|---------------------------------|------------|------------|-----------|------------|-----------|
| Most   | Hateful comments/total comments | -30        | -0.0033851 | 0.0027334 | -0.0098843 | 0.0031141 |
| Most   | Hateful comments/total comments | -29        | -0.0032034 | 0.0036063 | -0.0117782 | 0.0053714 |
| Most   | Hateful comments/total comments | -28        | 0.0037595  | 0.0098010 | -0.0195444 | 0.0270634 |
| Most   | Hateful comments/total comments | -27        | -0.0031419 | 0.0090329 | -0.0246194 | 0.0183357 |
| Most   | Hateful comments/total comments | -26        | -0.0017346 | 0.0038469 | -0.0108813 | 0.0074122 |
| Most   | Hateful comments/total comments | -25        | -0.0003223 | 0.0030682 | -0.0076176 | 0.0069731 |
| Most   | Hateful comments/total comments | -24        | -0.0011599 | 0.0061747 | -0.0158416 | 0.0135218 |
| Most   | Hateful comments/total comments | -23        | 0.0025599  | 0.0067541 | -0.0134993 | 0.0186191 |
| Most   | Hateful comments/total comments | -22        | -0.0030478 | 0.0083691 | -0.0229471 | 0.0168514 |
| Most   | Hateful comments/total comments | -21        | 0.0061379  | 0.0049811 | -0.0057058 | 0.0179817 |
| Most   | Hateful comments/total comments | -20        | 0.0034716  | 0.0056314 | -0.0099182 | 0.0168615 |
| Most   | Hateful comments/total comments | -19        | -0.0063961 | 0.0094614 | -0.0288926 | 0.0161005 |
| Most   | Hateful comments/total comments | -18        | -0.0036512 | 0.0047784 | -0.0150130 | 0.0077106 |
| Most   | Hateful comments/total comments | -17        | 0.0042455  | 0.0027932 | -0.0023959 | 0.0108870 |
| Most   | Hateful comments/total comments | -16        | -0.0002031 | 0.0029382 | -0.0071893 | 0.0067831 |
| Most   | Hateful comments/total comments | -15        | -0.0038049 | 0.0030453 | -0.0110457 | 0.0034359 |
| Most   | Hateful comments/total comments | -14        | -0.0008143 | 0.0037531 | -0.0097381 | 0.0081094 |
| Most   | Hateful comments/total comments | -13        | 0.0085316  | 0.0050013 | -0.0033601 | 0.0204234 |
| Most   | Hateful comments/total comments | -12        | -0.0052838 | 0.0069623 | -0.0218382 | 0.0112706 |
| Most   | Hateful comments/total comments | -11        | 0.0022225  | 0.0083693 | -0.0176773 | 0.0221223 |
| Most   | Hateful comments/total comments | -10        | -0.0018456 | 0.0053876 | -0.0146558 | 0.0109646 |
| Most   | Hateful comments/total comments | -9         | 0.0030314  | 0.0074592 | -0.0147045 | 0.0207673 |
| Most   | Hateful comments/total comments | -8         | -0.0104076 | 0.0044351 | -0.0209531 | 0.0001379 |
| Most   | Hateful comments/total comments | -7         | 0.0037648  | 0.0029323 | -0.0032072 | 0.0107369 |
| Most   | Hateful comments/total comments | -6         | 0.0038256  | 0.0067920 | -0.0123238 | 0.0199750 |
| Most   | Hateful comments/total comments | -5         | 0.0048751  | 0.0082031 | -0.0146296 | 0.0243799 |
| Most   | Hateful comments/total comments | -4         | -0.0072300 | 0.0073869 | -0.0247940 | 0.0103340 |
| Most   | Hateful comments/total comments | -3         | 0.0004246  | 0.0050654 | -0.0116195 | 0.0124687 |
| Most   | Hateful comments/total comments | -2         | 0.0004273  | 0.0108317 | -0.0253275 | 0.0261821 |
| Most   | Hateful comments/total comments | -1         | 0.0054383  | 0.0054763 | -0.0075829 | 0.0184595 |
| Most   | Hateful comments/total comments | 0          | 0.0024916  | 0.0061848 | -0.0122140 | 0.0171972 |
| Most   | Hateful comments/total comments | 1          | -0.0047891 | 0.0065818 | -0.0204388 | 0.0108607 |
| Most   | Hateful comments/total comments | 2          | -0.0007736 | 0.0117850 | -0.0287950 | 0.0272478 |
| Most   | Hateful comments/total comments | 3          | -0.0023975 | 0.0099913 | -0.0261540 | 0.0213590 |
| Most   | Hateful comments/total comments | 4          | -0.0058314 | 0.0097484 | -0.0290102 | 0.0173474 |
| Most   | Hateful comments/total comments | 5          | -0.0018492 | 0.0059019 | -0.0158822 | 0.0121838 |
| Most   | Hateful comments/total comments | 6          | -0.0072099 | 0.0064019 | -0.0224319 | 0.0080121 |
| Most   | Hateful comments/total comments | 7          | -0.0034209 | 0.0086944 | -0.0240936 | 0.0172518 |

|      |                                 |    |            |           |            |           |
|------|---------------------------------|----|------------|-----------|------------|-----------|
| Most | Hateful comments/total comments | 8  | 0.0010523  | 0.0061941 | -0.0136754 | 0.0157800 |
| Most | Hateful comments/total comments | 9  | -0.0013171 | 0.0025637 | -0.0074128 | 0.0047786 |
| Most | Hateful comments/total comments | 10 | -0.0007614 | 0.0075228 | -0.0186484 | 0.0171256 |
| Most | Hateful comments/total comments | 11 | -0.0007441 | 0.0051620 | -0.0130178 | 0.0115296 |
| Most | Hateful comments/total comments | 12 | -0.0000288 | 0.0094796 | -0.0225685 | 0.0225109 |
| Most | Hateful comments/total comments | 13 | -0.0027645 | 0.0089805 | -0.0241175 | 0.0185886 |
| Most | Hateful comments/total comments | 14 | 0.0066573  | 0.0022288 | 0.0013578  | 0.0119567 |
| Most | Hateful comments/total comments | 15 | 0.0053129  | 0.0122551 | -0.0238261 | 0.0344520 |
| Most | Hateful comments/total comments | 16 | 0.0072735  | 0.0067130 | -0.0086881 | 0.0232350 |
| Most | Hateful comments/total comments | 17 | 0.0054306  | 0.0164512 | -0.0336857 | 0.0445469 |
| Most | Hateful comments/total comments | 18 | 0.0081859  | 0.0136940 | -0.0243746 | 0.0407464 |
| Most | Hateful comments/total comments | 19 | 0.0096725  | 0.0003959 | 0.0087313  | 0.0106138 |
| Most | Hateful comments/total comments | 20 | 0.0025208  | 0.0058060 | -0.0112841 | 0.0163257 |
| Most | Hateful comments/total comments | 21 | 0.0038371  | 0.0093285 | -0.0183435 | 0.0260176 |
| Most | Hateful comments/total comments | 22 | 0.0079324  | 0.0130430 | -0.0230801 | 0.0389449 |
| Most | Hateful comments/total comments | 23 | 0.0162701  | 0.0064253 | 0.0009926  | 0.0315476 |
| Most | Hateful comments/total comments | 24 | 0.0043832  | 0.0144941 | -0.0300797 | 0.0388461 |
| Most | Hateful comments/total comments | 25 | 0.0137789  | 0.0024507 | 0.0079519  | 0.0196060 |
| Most | Hateful comments/total comments | 26 | 0.0066202  | 0.0064178 | -0.0086395 | 0.0218800 |
| Most | Hateful comments/total comments | 27 | 0.0128945  | 0.0006184 | 0.0114242  | 0.0143648 |
| Most | Hateful comments/total comments | 28 | 0.0147493  | 0.0123312 | -0.0145707 | 0.0440693 |
| Most | Hateful comments/total comments | 29 | 0.0159912  | 0.0134354 | -0.0159543 | 0.0479368 |
| Most | Hateful comments/total comments | 30 | -0.0017683 | 0.0181262 | -0.0448672 | 0.0413306 |

| sample | outcome                         | event.time | estimate   | std.error | conf.low   | conf.high |
|--------|---------------------------------|------------|------------|-----------|------------|-----------|
| Middle | Hateful comments/total comments | -30        | 0.0049522  | 0.0045641 | -0.0136677 | 0.0235721 |
| Middle | Hateful comments/total comments | -29        | 0.0034093  | 0.0032887 | -0.0100076 | 0.0168262 |
| Middle | Hateful comments/total comments | -28        | -0.0027224 | 0.0063643 | -0.0286864 | 0.0232416 |
| Middle | Hateful comments/total comments | -27        | 0.0024080  | 0.0066073 | -0.0245475 | 0.0293635 |
| Middle | Hateful comments/total comments | -26        | -0.0026831 | 0.0064295 | -0.0289131 | 0.0235469 |
| Middle | Hateful comments/total comments | -25        | -0.0008526 | 0.0094040 | -0.0392176 | 0.0375125 |
| Middle | Hateful comments/total comments | -24        | 0.0031996  | 0.0079793 | -0.0293532 | 0.0357523 |
| Middle | Hateful comments/total comments | -23        | -0.0083884 | 0.0075845 | -0.0393307 | 0.0225540 |
| Middle | Hateful comments/total comments | -22        | 0.0060324  | 0.0064443 | -0.0202581 | 0.0323229 |
| Middle | Hateful comments/total comments | -21        | -0.0046154 | 0.0058593 | -0.0285191 | 0.0192884 |
| Middle | Hateful comments/total comments | -20        | 0.0082363  | 0.0079671 | -0.0242668 | 0.0407395 |
| Middle | Hateful comments/total comments | -19        | -0.0112183 | 0.0063889 | -0.0372828 | 0.0148462 |
| Middle | Hateful comments/total comments | -18        | 0.0051857  | 0.0058433 | -0.0186531 | 0.0290244 |
| Middle | Hateful comments/total comments | -17        | 0.0078057  | 0.0062580 | -0.0177247 | 0.0333361 |
| Middle | Hateful comments/total comments | -16        | -0.0030358 | 0.0054244 | -0.0251656 | 0.0190940 |
| Middle | Hateful comments/total comments | -15        | 0.0015418  | 0.0029513 | -0.0104986 | 0.0135822 |

|        |                                 |     |            |           |            |           |
|--------|---------------------------------|-----|------------|-----------|------------|-----------|
| Middle | Hateful comments/total comments | -14 | -0.0083538 | 0.0029088 | -0.0202208 | 0.0035133 |
| Middle | Hateful comments/total comments | -13 | 0.0062483  | 0.0023961 | -0.0035271 | 0.0160238 |
| Middle | Hateful comments/total comments | -12 | -0.0083037 | 0.0061506 | -0.0333959 | 0.0167886 |
| Middle | Hateful comments/total comments | -11 | 0.0021911  | 0.0087369 | -0.0334523 | 0.0378346 |
| Middle | Hateful comments/total comments | -10 | 0.0054397  | 0.0100634 | -0.0356153 | 0.0464948 |
| Middle | Hateful comments/total comments | -9  | 0.0015373  | 0.0065617 | -0.0252324 | 0.0283069 |
| Middle | Hateful comments/total comments | -8  | -0.0020319 | 0.0080082 | -0.0347028 | 0.0306390 |
| Middle | Hateful comments/total comments | -7  | -0.0022793 | 0.0101839 | -0.0438262 | 0.0392677 |
| Middle | Hateful comments/total comments | -6  | 0.0012747  | 0.0151774 | -0.0606439 | 0.0631934 |
| Middle | Hateful comments/total comments | -5  | -0.0074142 | 0.0067818 | -0.0350818 | 0.0202534 |
| Middle | Hateful comments/total comments | -4  | 0.0042114  | 0.0073386 | -0.0257278 | 0.0341505 |
| Middle | Hateful comments/total comments | -3  | -0.0041503 | 0.0049733 | -0.0244397 | 0.0161391 |
| Middle | Hateful comments/total comments | -2  | 0.0031671  | 0.0080376 | -0.0296238 | 0.0359579 |
| Middle | Hateful comments/total comments | -1  | 0.0026862  | 0.0046335 | -0.0162167 | 0.0215891 |
| Middle | Hateful comments/total comments | 0   | 0.0040568  | 0.0052277 | -0.0172705 | 0.0253841 |
| Middle | Hateful comments/total comments | 1   | 0.0000141  | 0.0047083 | -0.0191940 | 0.0192222 |
| Middle | Hateful comments/total comments | 2   | -0.0015730 | 0.0041267 | -0.0184085 | 0.0152625 |
| Middle | Hateful comments/total comments | 3   | 0.0014331  | 0.0069253 | -0.0268199 | 0.0296860 |
| Middle | Hateful comments/total comments | 4   | -0.0006683 | 0.0041127 | -0.0174467 | 0.0161101 |
| Middle | Hateful comments/total comments | 5   | 0.0013886  | 0.0061743 | -0.0238003 | 0.0265775 |
| Middle | Hateful comments/total comments | 6   | 0.0011987  | 0.0045297 | -0.0172810 | 0.0196784 |
| Middle | Hateful comments/total comments | 7   | 0.0030320  | 0.0045154 | -0.0153892 | 0.0214533 |
| Middle | Hateful comments/total comments | 8   | 0.0027227  | 0.0077709 | -0.0289800 | 0.0344254 |
| Middle | Hateful comments/total comments | 9   | 0.0031434  | 0.0035253 | -0.0112386 | 0.0175253 |
| Middle | Hateful comments/total comments | 10  | -0.0011714 | 0.0035866 | -0.0158035 | 0.0134608 |
| Middle | Hateful comments/total comments | 11  | 0.0030015  | 0.0060254 | -0.0215800 | 0.0275831 |
| Middle | Hateful comments/total comments | 12  | 0.0060611  | 0.0087015 | -0.0294382 | 0.0415604 |
| Middle | Hateful comments/total comments | 13  | -0.0004778 | 0.0070903 | -0.0294037 | 0.0284481 |
| Middle | Hateful comments/total comments | 14  | 0.0092896  | 0.0077252 | -0.0222266 | 0.0408059 |
| Middle | Hateful comments/total comments | 15  | 0.0093023  | 0.0100165 | -0.0315614 | 0.0501661 |
| Middle | Hateful comments/total comments | 16  | 0.0085418  | 0.0131751 | -0.0452082 | 0.0622918 |
| Middle | Hateful comments/total comments | 17  | 0.0090802  | 0.0020572 | 0.0006874  | 0.0174730 |
| Middle | Hateful comments/total comments | 18  | 0.0119519  | 0.0087297 | -0.0236622 | 0.0475661 |
| Middle | Hateful comments/total comments | 19  | 0.0119465  | 0.0024621 | 0.0019021  | 0.0219910 |
| Middle | Hateful comments/total comments | 20  | 0.0116193  | 0.0071902 | -0.0177144 | 0.0409530 |
| Middle | Hateful comments/total comments | 21  | 0.0116328  | 0.0095905 | -0.0274931 | 0.0507587 |
| Middle | Hateful comments/total comments | 22  | 0.0126215  | 0.0172578 | -0.0577843 | 0.0830274 |
| Middle | Hateful comments/total comments | 23  | 0.0035519  | 0.0093389 | -0.0345477 | 0.0416514 |
| Middle | Hateful comments/total comments | 24  | 0.0062593  | 0.0114568 | -0.0404806 | 0.0529991 |
| Middle | Hateful comments/total comments | 25  | 0.0114549  | 0.0073159 | -0.0183914 | 0.0413012 |
| Middle | Hateful comments/total comments | 26  | 0.0085121  | 0.0127882 | -0.0436594 | 0.0606836 |

|        |                                 |    |            |           |            |           |
|--------|---------------------------------|----|------------|-----------|------------|-----------|
| Middle | Hateful comments/total comments | 27 | -0.0030281 | 0.0051650 | -0.0240994 | 0.0180432 |
| Middle | Hateful comments/total comments | 28 | 0.0171943  | 0.0375989 | -0.1361966 | 0.1705851 |
| Middle | Hateful comments/total comments | 29 | 0.0032399  | 0.0100540 | -0.0377772 | 0.0442570 |
| Middle | Hateful comments/total comments | 30 | 0.0038395  | 0.0248902 | -0.0977042 | 0.1053832 |

| sample | outcome                         | event.time | estimate   | std.error | conf.low   | conf.high  |
|--------|---------------------------------|------------|------------|-----------|------------|------------|
| Least  | Hateful comments/total comments | -30        | -0.0015757 | 0.0050822 | -0.0126216 | 0.0094703  |
| Least  | Hateful comments/total comments | -29        | -0.0054893 | 0.0079024 | -0.0226649 | 0.0116864  |
| Least  | Hateful comments/total comments | -28        | 0.0002693  | 0.0045985 | -0.0097253 | 0.0102640  |
| Least  | Hateful comments/total comments | -27        | 0.0053093  | 0.0080392 | -0.0121636 | 0.0227822  |
| Least  | Hateful comments/total comments | -26        | -0.0020607 | 0.0064256 | -0.0160265 | 0.0119050  |
| Least  | Hateful comments/total comments | -25        | 0.0037846  | 0.0050099 | -0.0071043 | 0.0146735  |
| Least  | Hateful comments/total comments | -24        | -0.0004785 | 0.0013791 | -0.0034760 | 0.0025191  |
| Least  | Hateful comments/total comments | -23        | -0.0000495 | 0.0032764 | -0.0071706 | 0.0070717  |
| Least  | Hateful comments/total comments | -22        | -0.0084360 | 0.0050907 | -0.0195005 | 0.0026284  |
| Least  | Hateful comments/total comments | -21        | 0.0042227  | 0.0041965 | -0.0048983 | 0.0133437  |
| Least  | Hateful comments/total comments | -20        | 0.0046591  | 0.0040885 | -0.0042271 | 0.0135453  |
| Least  | Hateful comments/total comments | -19        | 0.0055506  | 0.0024286 | 0.0002722  | 0.0108290  |
| Least  | Hateful comments/total comments | -18        | -0.0071532 | 0.0031576 | -0.0140160 | -0.0002903 |
| Least  | Hateful comments/total comments | -17        | 0.0025739  | 0.0045695 | -0.0073577 | 0.0125054  |
| Least  | Hateful comments/total comments | -16        | -0.0010922 | 0.0037677 | -0.0092811 | 0.0070968  |
| Least  | Hateful comments/total comments | -15        | 0.0009705  | 0.0041529 | -0.0080557 | 0.0099967  |
| Least  | Hateful comments/total comments | -14        | 0.0063024  | 0.0041088 | -0.0026279 | 0.0152326  |
| Least  | Hateful comments/total comments | -13        | -0.0118589 | 0.0081090 | -0.0294837 | 0.0057658  |
| Least  | Hateful comments/total comments | -12        | 0.0064170  | 0.0085367 | -0.0121371 | 0.0249712  |
| Least  | Hateful comments/total comments | -11        | -0.0012004 | 0.0043816 | -0.0107236 | 0.0083227  |
| Least  | Hateful comments/total comments | -10        | 0.0000398  | 0.0093217 | -0.0202206 | 0.0203002  |
| Least  | Hateful comments/total comments | -9         | 0.0011918  | 0.0062020 | -0.0122881 | 0.0146717  |
| Least  | Hateful comments/total comments | -8         | -0.0050156 | 0.0055041 | -0.0169786 | 0.0069474  |
| Least  | Hateful comments/total comments | -7         | -0.0003983 | 0.0027012 | -0.0062693 | 0.0054727  |
| Least  | Hateful comments/total comments | -6         | 0.0002735  | 0.0033040 | -0.0069077 | 0.0074547  |
| Least  | Hateful comments/total comments | -5         | 0.0045944  | 0.0050747 | -0.0064352 | 0.0156240  |
| Least  | Hateful comments/total comments | -4         | -0.0044908 | 0.0057343 | -0.0169542 | 0.0079726  |
| Least  | Hateful comments/total comments | -3         | -0.0034797 | 0.0052853 | -0.0149672 | 0.0080078  |
| Least  | Hateful comments/total comments | -2         | 0.0020507  | 0.0061462 | -0.0113078 | 0.0154092  |
| Least  | Hateful comments/total comments | -1         | 0.0012094  | 0.0042008 | -0.0079209 | 0.0103397  |
| Least  | Hateful comments/total comments | 0          | -0.0029898 | 0.0078322 | -0.0200128 | 0.0140332  |
| Least  | Hateful comments/total comments | 1          | 0.0018679  | 0.0046897 | -0.0083249 | 0.0120608  |
| Least  | Hateful comments/total comments | 2          | 0.0032377  | 0.0051363 | -0.0079259 | 0.0144012  |
| Least  | Hateful comments/total comments | 3          | 0.0014477  | 0.0052429 | -0.0099476 | 0.0128430  |
| Least  | Hateful comments/total comments | 4          | 0.0017760  | 0.0118875 | -0.0240610 | 0.0276130  |

|       |                                 |    |            |           |            |           |
|-------|---------------------------------|----|------------|-----------|------------|-----------|
| Least | Hateful comments/total comments | 5  | 0.0035555  | 0.0037724 | -0.0046437 | 0.0117547 |
| Least | Hateful comments/total comments | 6  | 0.0045334  | 0.0051946 | -0.0067569 | 0.0158237 |
| Least | Hateful comments/total comments | 7  | 0.0029698  | 0.0072051 | -0.0126903 | 0.0186299 |
| Least | Hateful comments/total comments | 8  | 0.0032334  | 0.0053237 | -0.0083376 | 0.0148044 |
| Least | Hateful comments/total comments | 9  | 0.0011119  | 0.0080284 | -0.0163375 | 0.0185612 |
| Least | Hateful comments/total comments | 10 | 0.0059940  | 0.0059184 | -0.0068694 | 0.0188574 |
| Least | Hateful comments/total comments | 11 | 0.0059786  | 0.0065100 | -0.0081707 | 0.0201279 |
| Least | Hateful comments/total comments | 12 | 0.0080996  | 0.0053540 | -0.0035372 | 0.0197364 |
| Least | Hateful comments/total comments | 13 | 0.0018576  | 0.0072597 | -0.0139213 | 0.0176364 |
| Least | Hateful comments/total comments | 14 | 0.0106515  | 0.0269170 | -0.0478518 | 0.0691549 |
| Least | Hateful comments/total comments | 15 | 0.0024729  | 0.0017818 | -0.0013997 | 0.0063456 |
| Least | Hateful comments/total comments | 16 | 0.0051971  | 0.0053547 | -0.0064410 | 0.0168353 |
| Least | Hateful comments/total comments | 17 | 0.0034721  | 0.0062262 | -0.0100602 | 0.0170045 |
| Least | Hateful comments/total comments | 18 | 0.0064717  | 0.0074267 | -0.0096701 | 0.0226135 |
| Least | Hateful comments/total comments | 19 | 0.0006301  | 0.0046930 | -0.0095700 | 0.0108303 |
| Least | Hateful comments/total comments | 20 | 0.0051260  | 0.0071590 | -0.0104339 | 0.0206859 |
| Least | Hateful comments/total comments | 21 | 0.0061996  | 0.0100659 | -0.0156783 | 0.0280776 |
| Least | Hateful comments/total comments | 22 | 0.0095507  | 0.0067210 | -0.0050572 | 0.0241587 |
| Least | Hateful comments/total comments | 23 | 0.0054806  | 0.0127925 | -0.0223235 | 0.0332847 |
| Least | Hateful comments/total comments | 24 | 0.0098629  | 0.0022417 | 0.0049906  | 0.0147352 |
| Least | Hateful comments/total comments | 25 | 0.0030753  | 0.0085848 | -0.0155834 | 0.0217340 |
| Least | Hateful comments/total comments | 26 | 0.0071113  | 0.0083588 | -0.0110563 | 0.0252788 |
| Least | Hateful comments/total comments | 27 | 0.0028618  | 0.0113121 | -0.0217246 | 0.0274482 |
| Least | Hateful comments/total comments | 28 | 0.0066529  | 0.0314476 | -0.0616973 | 0.0750032 |
| Least | Hateful comments/total comments | 29 | -0.0028230 | 0.0628612 | -0.1394498 | 0.1338037 |
| Least | Hateful comments/total comments | 30 | 0.0007135  | 0.0283565 | -0.0609184 | 0.0623455 |

## Audience outdegree

Average effect by length of exposure (Callaway and Sant'Anna)

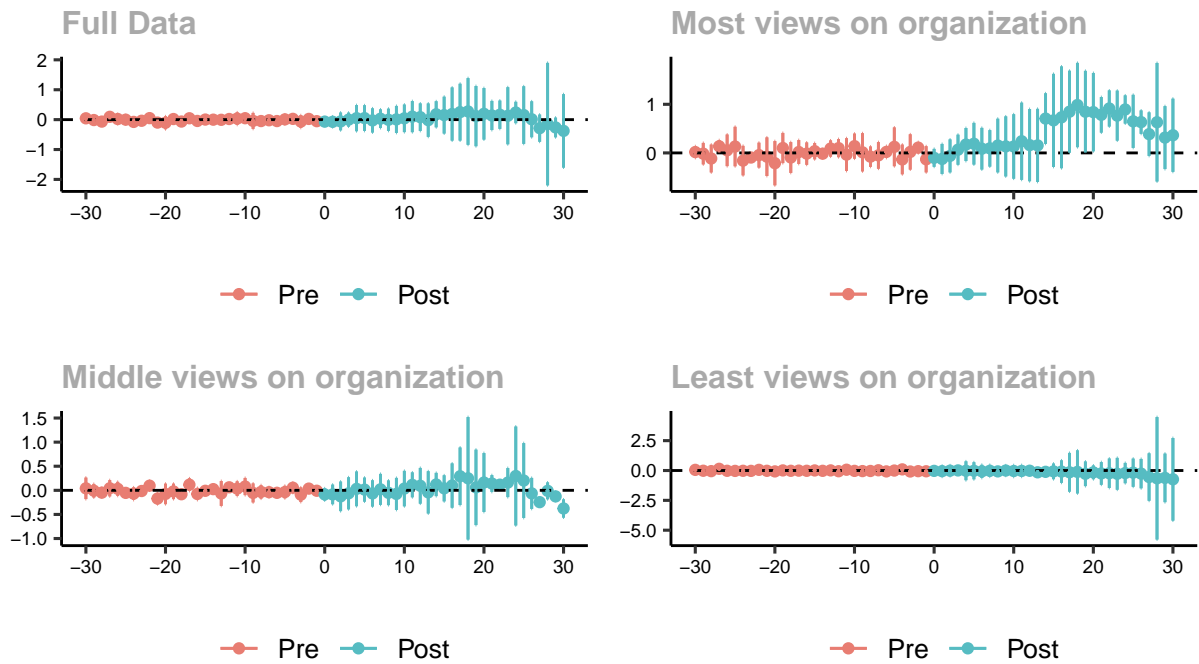

Long timeframe with sampled control groups

| sample | outcome            | event.time | estimate   | std.error | conf.low   | conf.high |
|--------|--------------------|------------|------------|-----------|------------|-----------|
| Full   | Audience outdegree | -30        | 0.0438899  | 0.0358693 | -0.0517469 | 0.1395267 |
| Full   | Audience outdegree | -29        | -0.0141968 | 0.0256821 | -0.0826719 | 0.0542783 |
| Full   | Audience outdegree | -28        | -0.0659118 | 0.0485869 | -0.1954570 | 0.0636335 |
| Full   | Audience outdegree | -27        | 0.0941532  | 0.0328562 | 0.0065502  | 0.1817561 |
| Full   | Audience outdegree | -26        | 0.0204704  | 0.0641604 | -0.1505975 | 0.1915384 |
| Full   | Audience outdegree | -25        | -0.0013504 | 0.0573529 | -0.1542681 | 0.1515673 |
| Full   | Audience outdegree | -24        | -0.0765206 | 0.0446638 | -0.1956058 | 0.0425645 |
| Full   | Audience outdegree | -23        | -0.0381033 | 0.0391900 | -0.1425939 | 0.0663874 |
| Full   | Audience outdegree | -22        | 0.0503281  | 0.0536819 | -0.0928015 | 0.1934577 |
| Full   | Audience outdegree | -21        | -0.0989559 | 0.0396579 | -0.2046941 | 0.0067822 |
| Full   | Audience outdegree | -20        | -0.1049739 | 0.0810625 | -0.3211072 | 0.1111595 |
| Full   | Audience outdegree | -19        | 0.0201107  | 0.0569920 | -0.1318447 | 0.1720661 |
| Full   | Audience outdegree | -18        | -0.0637051 | 0.0357388 | -0.1589939 | 0.0315837 |
| Full   | Audience outdegree | -17        | 0.0457460  | 0.0295783 | -0.0331173 | 0.1246094 |
| Full   | Audience outdegree | -16        | -0.0445058 | 0.0526899 | -0.1849906 | 0.0959790 |
| Full   | Audience outdegree | -15        | 0.0018632  | 0.0260221 | -0.0675184 | 0.0712449 |
| Full   | Audience outdegree | -14        | -0.0013700 | 0.0142009 | -0.0392332 | 0.0364932 |
| Full   | Audience outdegree | -13        | -0.0062287 | 0.0424505 | -0.1194125 | 0.1069552 |
| Full   | Audience outdegree | -12        | 0.0212628  | 0.0336919 | -0.0685683 | 0.1110940 |

|      |                    |     |            |           |            |           |
|------|--------------------|-----|------------|-----------|------------|-----------|
| Full | Audience outdegree | -11 | 0.0350824  | 0.0782648 | -0.1735916 | 0.2437564 |
| Full | Audience outdegree | -10 | 0.0480232  | 0.0520078 | -0.0906430 | 0.1866894 |
| Full | Audience outdegree | -9  | -0.0419918 | 0.1000449 | -0.3087371 | 0.2247534 |
| Full | Audience outdegree | -8  | -0.0474461 | 0.0523882 | -0.1871265 | 0.0922344 |
| Full | Audience outdegree | -7  | -0.0210695 | 0.0397289 | -0.1269970 | 0.0848581 |
| Full | Audience outdegree | -6  | -0.0479741 | 0.0456916 | -0.1697996 | 0.0738515 |
| Full | Audience outdegree | -5  | 0.0089663  | 0.0621768 | -0.1568129 | 0.1747456 |
| Full | Audience outdegree | -4  | 0.0259191  | 0.0392408 | -0.0787068 | 0.1305451 |
| Full | Audience outdegree | -3  | -0.0641271 | 0.0794229 | -0.2758889 | 0.1476346 |
| Full | Audience outdegree | -2  | 0.0237572  | 0.0543758 | -0.1212227 | 0.1687371 |
| Full | Audience outdegree | -1  | -0.0517425 | 0.0531708 | -0.1935094 | 0.0900244 |
| Full | Audience outdegree | 0   | -0.0663858 | 0.0532836 | -0.2084534 | 0.0756819 |
| Full | Audience outdegree | 1   | -0.0726803 | 0.0680215 | -0.2540432 | 0.1086826 |
| Full | Audience outdegree | 2   | -0.0603097 | 0.1113394 | -0.3571691 | 0.2365496 |
| Full | Audience outdegree | 3   | -0.0002476 | 0.0877233 | -0.2341405 | 0.2336453 |
| Full | Audience outdegree | 4   | 0.0497799  | 0.1637474 | -0.3868126 | 0.4863724 |
| Full | Audience outdegree | 5   | 0.0514929  | 0.1608643 | -0.3774125 | 0.4803983 |
| Full | Audience outdegree | 6   | -0.0265622 | 0.1513324 | -0.4300533 | 0.3769288 |
| Full | Audience outdegree | 7   | 0.0305780  | 0.1169492 | -0.2812385 | 0.3423945 |
| Full | Audience outdegree | 8   | -0.0054540 | 0.1390255 | -0.3761317 | 0.3652236 |
| Full | Audience outdegree | 9   | 0.0072528  | 0.1693332 | -0.4442329 | 0.4587385 |
| Full | Audience outdegree | 10  | 0.0430022  | 0.1728634 | -0.4178961 | 0.5039005 |
| Full | Audience outdegree | 11  | 0.1003363  | 0.1947955 | -0.4190383 | 0.6197110 |
| Full | Audience outdegree | 12  | 0.0822160  | 0.1725609 | -0.3778757 | 0.5423078 |
| Full | Audience outdegree | 13  | -0.0166005 | 0.2090677 | -0.5740285 | 0.5408276 |
| Full | Audience outdegree | 14  | 0.1788605  | 0.1633591 | -0.2566968 | 0.6144178 |
| Full | Audience outdegree | 15  | 0.1511442  | 0.2309699 | -0.4646809 | 0.7669693 |
| Full | Audience outdegree | 16  | 0.1880167  | 0.3333311 | -0.7007295 | 1.0767630 |
| Full | Audience outdegree | 17  | 0.2500992  | 0.3565042 | -0.7004323 | 1.2006308 |
| Full | Audience outdegree | 18  | 0.2737884  | 0.4182286 | -0.8413163 | 1.3888930 |
| Full | Audience outdegree | 19  | 0.1172249  | 0.3775199 | -0.8893399 | 1.1237897 |
| Full | Audience outdegree | 20  | 0.1949132  | 0.3228418 | -0.6658658 | 1.0556922 |
| Full | Audience outdegree | 21  | 0.1390172  | 0.1826872 | -0.3480738 | 0.6261081 |
| Full | Audience outdegree | 22  | 0.1644983  | 0.1773576 | -0.3083825 | 0.6373790 |
| Full | Audience outdegree | 23  | 0.1296546  | 0.3577343 | -0.8241567 | 1.0834660 |
| Full | Audience outdegree | 24  | 0.2387979  | 0.1341090 | -0.1187711 | 0.5963669 |
| Full | Audience outdegree | 25  | 0.1530068  | 0.3608477 | -0.8091057 | 1.1151193 |
| Full | Audience outdegree | 26  | 0.0118878  | 0.2250906 | -0.5882616 | 0.6120372 |
| Full | Audience outdegree | 27  | -0.2848817 | 0.1703770 | -0.7391507 | 0.1693872 |
| Full | Audience outdegree | 28  | -0.1491156 | 0.7678110 | -2.1962968 | 1.8980656 |
| Full | Audience outdegree | 29  | -0.2619942 | 0.1231970 | -0.5904690 | 0.0664806 |

|      |                    |    |            |           |            |           |
|------|--------------------|----|------------|-----------|------------|-----------|
| Full | Audience outdegree | 30 | -0.3765142 | 0.4603176 | -1.6038391 | 0.8508108 |
|------|--------------------|----|------------|-----------|------------|-----------|

| sample | outcome            | event.time | estimate   | std.error | conf.low   | conf.high  |
|--------|--------------------|------------|------------|-----------|------------|------------|
| Most   | Audience outdegree | -30        | 0.0174907  | 0.0546461 | -0.1037198 | 0.1387012  |
| Most   | Audience outdegree | -29        | -0.0148782 | 0.0995254 | -0.2356354 | 0.2058790  |
| Most   | Audience outdegree | -28        | -0.1147699 | 0.1290493 | -0.4010141 | 0.1714742  |
| Most   | Audience outdegree | -27        | 0.1363221  | 0.0571229 | 0.0096179  | 0.2630263  |
| Most   | Audience outdegree | -26        | 0.0538379  | 0.1464846 | -0.2710793 | 0.3787552  |
| Most   | Audience outdegree | -25        | 0.1316332  | 0.1830985 | -0.2744973 | 0.5377638  |
| Most   | Audience outdegree | -24        | -0.1584002 | 0.1368020 | -0.4618405 | 0.1450402  |
| Most   | Audience outdegree | -23        | -0.0945687 | 0.0338001 | -0.1695406 | -0.0195967 |
| Most   | Audience outdegree | -22        | -0.0450596 | 0.1152648 | -0.3007284 | 0.2106092  |
| Most   | Audience outdegree | -21        | -0.0774013 | 0.1789313 | -0.4742887 | 0.3194860  |
| Most   | Audience outdegree | -20        | -0.2114798 | 0.2049388 | -0.6660541 | 0.2430946  |
| Most   | Audience outdegree | -19        | 0.1007708  | 0.1398048 | -0.2093301 | 0.4108717  |
| Most   | Audience outdegree | -18        | -0.0942521 | 0.1426573 | -0.4106800 | 0.2221758  |
| Most   | Audience outdegree | -17        | 0.0192381  | 0.1108131 | -0.2265564 | 0.2650325  |
| Most   | Audience outdegree | -16        | -0.0143244 | 0.1034094 | -0.2436966 | 0.2150478  |
| Most   | Audience outdegree | -15        | 0.0363165  | 0.0755547 | -0.1312712 | 0.2039043  |
| Most   | Audience outdegree | -14        | -0.0154141 | 0.0419408 | -0.1084430 | 0.0776147  |
| Most   | Audience outdegree | -13        | 0.0905372  | 0.0752464 | -0.0763667 | 0.2574410  |
| Most   | Audience outdegree | -12        | 0.0987758  | 0.0842711 | -0.0881457 | 0.2856974  |
| Most   | Audience outdegree | -11        | -0.0345100 | 0.1521058 | -0.3718957 | 0.3028757  |
| Most   | Audience outdegree | -10        | 0.1396530  | 0.1160849 | -0.1178349 | 0.3971408  |
| Most   | Audience outdegree | -9         | 0.0128738  | 0.1769715 | -0.3796664 | 0.4054141  |
| Most   | Audience outdegree | -8         | -0.0771166 | 0.0942776 | -0.2862335 | 0.1320003  |
| Most   | Audience outdegree | -7         | -0.0507543 | 0.1233971 | -0.3244614 | 0.2229527  |
| Most   | Audience outdegree | -6         | 0.0202355  | 0.0555690 | -0.1030220 | 0.1434931  |
| Most   | Audience outdegree | -5         | 0.1251910  | 0.1798720 | -0.2737828 | 0.5241649  |
| Most   | Audience outdegree | -4         | -0.1339576 | 0.1376992 | -0.4393881 | 0.1714728  |
| Most   | Audience outdegree | -3         | 0.0203080  | 0.1636372 | -0.3426555 | 0.3832715  |
| Most   | Audience outdegree | -2         | 0.1089181  | 0.0518699 | -0.0061345 | 0.2239708  |
| Most   | Audience outdegree | -1         | -0.1311130 | 0.1212596 | -0.4000787 | 0.1378527  |
| Most   | Audience outdegree | 0          | -0.1009127 | 0.0830013 | -0.2850178 | 0.0831925  |
| Most   | Audience outdegree | 1          | -0.1234186 | 0.1391163 | -0.4319924 | 0.1851551  |
| Most   | Audience outdegree | 2          | -0.0612361 | 0.1527531 | -0.4000575 | 0.2775853  |
| Most   | Audience outdegree | 3          | 0.0663538  | 0.1394480 | -0.2429556 | 0.3756632  |
| Most   | Audience outdegree | 4          | 0.1729813  | 0.1530850 | -0.1665763 | 0.5125389  |
| Most   | Audience outdegree | 5          | 0.1893905  | 0.1930813 | -0.2388828 | 0.6176639  |
| Most   | Audience outdegree | 6          | 0.0869829  | 0.1929752 | -0.3410552 | 0.5150210  |
| Most   | Audience outdegree | 7          | 0.0938138  | 0.1689957 | -0.2810354 | 0.4686630  |



|      |                    |    |           |           |            |           |
|------|--------------------|----|-----------|-----------|------------|-----------|
| Most | Audience outdegree | 8  | 0.1517515 | 0.2487084 | -0.3999083 | 0.7034113 |
| Most | Audience outdegree | 9  | 0.1345520 | 0.2783289 | -0.4828090 | 0.7519130 |
| Most | Audience outdegree | 10 | 0.1328925 | 0.2984856 | -0.5291780 | 0.7949629 |
| Most | Audience outdegree | 11 | 0.2404556 | 0.3576198 | -0.5527804 | 1.0336916 |
| Most | Audience outdegree | 12 | 0.1604523 | 0.3349350 | -0.5824667 | 0.9033712 |
| Most | Audience outdegree | 13 | 0.1546689 | 0.3388309 | -0.5968915 | 0.9062293 |
| Most | Audience outdegree | 14 | 0.7065818 | 0.2343291 | 0.1868167  | 1.2263470 |
| Most | Audience outdegree | 15 | 0.6692649 | 0.4314539 | -0.2877425 | 1.6262723 |
| Most | Audience outdegree | 16 | 0.7321760 | 0.4716442 | -0.3139774 | 1.7783294 |
| Most | Audience outdegree | 17 | 0.8477424 | 0.3800708 | 0.0047080  | 1.6907769 |
| Most | Audience outdegree | 18 | 0.9851677 | 0.3909239 | 0.1180599  | 1.8522755 |
| Most | Audience outdegree | 19 | 0.8475375 | 0.3790220 | 0.0068293  | 1.6882457 |
| Most | Audience outdegree | 20 | 0.8393440 | 0.3631564 | 0.0338273  | 1.6448606 |
| Most | Audience outdegree | 21 | 0.7839165 | 0.1647834 | 0.4184107  | 1.1494223 |
| Most | Audience outdegree | 22 | 0.9144861 | 0.1673432 | 0.5433025  | 1.2856697 |
| Most | Audience outdegree | 23 | 0.7674710 | 0.2317474 | 0.2534324  | 1.2815096 |
| Most | Audience outdegree | 24 | 0.8937456 | 0.1305828 | 0.6041001  | 1.1833911 |
| Most | Audience outdegree | 25 | 0.6496004 | 0.2462021 | 0.1034999  | 1.1957009 |
| Most | Audience outdegree | 26 | 0.6334833 | 0.1084963 | 0.3928278  | 0.8741389 |
| Most | Audience outdegree | 27 | 0.3861669 | 0.2017884 | -0.0614196 | 0.8337535 |
| Most | Audience outdegree | 28 | 0.6315426 | 0.5495158 | -0.5873376 | 1.8504229 |
| Most | Audience outdegree | 29 | 0.3153722 | 0.2917425 | -0.3317415 | 0.9624860 |
| Most | Audience outdegree | 30 | 0.3636353 | 0.3391053 | -0.3885338 | 1.1158045 |

| sample | outcome            | event.time | estimate   | std.error | conf.low   | conf.high  |
|--------|--------------------|------------|------------|-----------|------------|------------|
| Middle | Audience outdegree | -30        | 0.0413650  | 0.0921108 | -0.1812854 | 0.2640153  |
| Middle | Audience outdegree | -29        | -0.0080603 | 0.0583102 | -0.1490078 | 0.1328873  |
| Middle | Audience outdegree | -28        | -0.0481293 | 0.0404427 | -0.1458874 | 0.0496288  |
| Middle | Audience outdegree | -27        | 0.0429632  | 0.0695962 | -0.1252648 | 0.2111911  |
| Middle | Audience outdegree | -26        | 0.0309916  | 0.0600097 | -0.1140639 | 0.1760472  |
| Middle | Audience outdegree | -25        | -0.0527700 | 0.0277006 | -0.1197279 | 0.0141880  |
| Middle | Audience outdegree | -24        | -0.0694017 | 0.0542229 | -0.2004695 | 0.0616660  |
| Middle | Audience outdegree | -23        | -0.0142454 | 0.0230238 | -0.0698986 | 0.0414079  |
| Middle | Audience outdegree | -22        | 0.0964641  | 0.0418983 | -0.0048125 | 0.1977407  |
| Middle | Audience outdegree | -21        | -0.1708694 | 0.0490128 | -0.2893433 | -0.0523956 |
| Middle | Audience outdegree | -20        | -0.0748897 | 0.0879276 | -0.2874286 | 0.1376491  |
| Middle | Audience outdegree | -19        | -0.0223559 | 0.0662620 | -0.1825245 | 0.1378127  |
| Middle | Audience outdegree | -18        | -0.0810944 | 0.0159445 | -0.1196355 | -0.0425533 |
| Middle | Audience outdegree | -17        | 0.1172559  | 0.0542183 | -0.0138006 | 0.2483124  |
| Middle | Audience outdegree | -16        | -0.0754584 | 0.0520015 | -0.2011566 | 0.0502398  |
| Middle | Audience outdegree | -15        | -0.0098596 | 0.0236284 | -0.0669742 | 0.0472549  |

|        |                    |     |            |           |            |           |
|--------|--------------------|-----|------------|-----------|------------|-----------|
| Middle | Audience outdegree | -14 | 0.0244312  | 0.0206900 | -0.0255806 | 0.0744431 |
| Middle | Audience outdegree | -13 | -0.0649057 | 0.1066973 | -0.3228145 | 0.1930031 |
| Middle | Audience outdegree | -12 | 0.0625636  | 0.0288930 | -0.0072765 | 0.1324038 |
| Middle | Audience outdegree | -11 | 0.0347941  | 0.0630372 | -0.1175796 | 0.1871677 |
| Middle | Audience outdegree | -10 | 0.0785917  | 0.0736860 | -0.0995222 | 0.2567056 |
| Middle | Audience outdegree | -9  | -0.0539890 | 0.0813472 | -0.2506216 | 0.1426436 |
| Middle | Audience outdegree | -8  | -0.0328406 | 0.0578598 | -0.1726995 | 0.1070182 |
| Middle | Audience outdegree | -7  | -0.0384118 | 0.0438715 | -0.1444582 | 0.0676346 |
| Middle | Audience outdegree | -6  | -0.0515810 | 0.0389131 | -0.1456418 | 0.0424798 |
| Middle | Audience outdegree | -5  | -0.0357191 | 0.0537592 | -0.1656658 | 0.0942277 |
| Middle | Audience outdegree | -4  | 0.0537450  | 0.0444606 | -0.0537253 | 0.1612152 |
| Middle | Audience outdegree | -3  | -0.0905767 | 0.0629725 | -0.2427939 | 0.0616406 |
| Middle | Audience outdegree | -2  | 0.0356377  | 0.0288829 | -0.0341782 | 0.1054536 |
| Middle | Audience outdegree | -1  | -0.0084986 | 0.0279061 | -0.0759533 | 0.0589561 |
| Middle | Audience outdegree | 0   | -0.0846806 | 0.0524963 | -0.2115748 | 0.0422136 |
| Middle | Audience outdegree | 1   | -0.0848265 | 0.0841712 | -0.2882852 | 0.1186322 |
| Middle | Audience outdegree | 2   | -0.1249390 | 0.1268815 | -0.4316373 | 0.1817592 |
| Middle | Audience outdegree | 3   | -0.0615961 | 0.1375258 | -0.3940238 | 0.2708315 |
| Middle | Audience outdegree | 4   | 0.0304082  | 0.1488251 | -0.3293321 | 0.3901484 |
| Middle | Audience outdegree | 5   | 0.0151216  | 0.1030178 | -0.2338932 | 0.2641364 |
| Middle | Audience outdegree | 6   | -0.0642666 | 0.1124257 | -0.3360222 | 0.2074890 |
| Middle | Audience outdegree | 7   | 0.0205985  | 0.1325502 | -0.2998020 | 0.3409989 |
| Middle | Audience outdegree | 8   | -0.0515299 | 0.1057278 | -0.3070953 | 0.2040355 |
| Middle | Audience outdegree | 9   | -0.0746816 | 0.1374568 | -0.4069425 | 0.2575792 |
| Middle | Audience outdegree | 10  | 0.0361883  | 0.1522132 | -0.3317418 | 0.4041185 |
| Middle | Audience outdegree | 11  | 0.1137518  | 0.1067375 | -0.1442544 | 0.3717579 |
| Middle | Audience outdegree | 12  | 0.0943344  | 0.1532265 | -0.2760451 | 0.4647138 |
| Middle | Audience outdegree | 13  | -0.0422314 | 0.1812876 | -0.4804402 | 0.3959774 |
| Middle | Audience outdegree | 14  | 0.1212018  | 0.0998042 | -0.1200451 | 0.3624487 |
| Middle | Audience outdegree | 15  | 0.0411530  | 0.1118510 | -0.2292135 | 0.3115196 |
| Middle | Audience outdegree | 16  | 0.0990609  | 0.1900891 | -0.3604229 | 0.5585448 |
| Middle | Audience outdegree | 17  | 0.2919024  | 0.2468682 | -0.3048279 | 0.8886326 |
| Middle | Audience outdegree | 18  | 0.2497893  | 0.5254880 | -1.0204214 | 1.5200000 |
| Middle | Audience outdegree | 19  | 0.0612624  | 0.3236535 | -0.7210735 | 0.8435983 |
| Middle | Audience outdegree | 20  | 0.1623591  | 0.2526417 | -0.4483268 | 0.7730451 |
| Middle | Audience outdegree | 21  | 0.1407442  | 0.0719998 | -0.0332939 | 0.3147822 |
| Middle | Audience outdegree | 22  | 0.1169620  | 0.0309872 | 0.0420597  | 0.1918643 |
| Middle | Audience outdegree | 23  | 0.1610047  | 0.1248063 | -0.1406773 | 0.4626868 |
| Middle | Audience outdegree | 24  | 0.2973103  | 0.4246143 | -0.7290682 | 1.3236889 |
| Middle | Audience outdegree | 25  | 0.2029908  | 0.3212082 | -0.5734342 | 0.9794158 |
| Middle | Audience outdegree | 26  | -0.0638509 | 0.1330005 | -0.3853400 | 0.2576383 |

|        |                    |    |            |           |            |            |
|--------|--------------------|----|------------|-----------|------------|------------|
| Middle | Audience outdegree | 27 | -0.2454004 | 0.0250501 | -0.3059515 | -0.1848493 |
| Middle | Audience outdegree | 28 | -0.0109900 | 0.0722483 | -0.1856288 | 0.1636488  |
| Middle | Audience outdegree | 29 | -0.1256974 | 0.0390539 | -0.2200986 | -0.0312962 |
| Middle | Audience outdegree | 30 | -0.3767777 | 0.0780493 | -0.5654387 | -0.1881168 |

| sample | outcome            | event.time | estimate   | std.error | conf.low   | conf.high |
|--------|--------------------|------------|------------|-----------|------------|-----------|
| Least  | Audience outdegree | -30        | 0.0536745  | 0.0487617 | -0.0735692 | 0.1809182 |
| Least  | Audience outdegree | -29        | -0.0193114 | 0.1315242 | -0.3625240 | 0.3239013 |
| Least  | Audience outdegree | -28        | -0.0543199 | 0.0238856 | -0.1166495 | 0.0080097 |
| Least  | Audience outdegree | -27        | 0.1416154  | 0.0350426 | 0.0501716  | 0.2330592 |
| Least  | Audience outdegree | -26        | -0.0234376 | 0.0334722 | -0.1107834 | 0.0639083 |
| Least  | Audience outdegree | -25        | -0.0332190 | 0.0433982 | -0.1464667 | 0.0800286 |
| Least  | Audience outdegree | -24        | -0.0232639 | 0.0686453 | -0.2023940 | 0.1558661 |
| Least  | Audience outdegree | -23        | -0.0307412 | 0.0831113 | -0.2476203 | 0.1861378 |
| Least  | Audience outdegree | -22        | 0.0549361  | 0.0512389 | -0.0787718 | 0.1886441 |
| Least  | Audience outdegree | -21        | -0.0234749 | 0.1340213 | -0.3732038 | 0.3262541 |
| Least  | Audience outdegree | -20        | -0.0766411 | 0.0579807 | -0.2279417 | 0.0746596 |
| Least  | Audience outdegree | -19        | 0.0078937  | 0.0883331 | -0.2226116 | 0.2383990 |
| Least  | Audience outdegree | -18        | -0.0234383 | 0.0655769 | -0.1945613 | 0.1476847 |
| Least  | Audience outdegree | -17        | -0.0098740 | 0.0320944 | -0.0936243 | 0.0738763 |
| Least  | Audience outdegree | -16        | -0.0248301 | 0.0824062 | -0.2398692 | 0.1902091 |
| Least  | Audience outdegree | -15        | 0.0043079  | 0.0221455 | -0.0534807 | 0.0620965 |
| Least  | Audience outdegree | -14        | -0.0267858 | 0.0316006 | -0.1092477 | 0.0556762 |
| Least  | Audience outdegree | -13        | 0.0099015  | 0.0448408 | -0.1071106 | 0.1269136 |
| Least  | Audience outdegree | -12        | -0.0603271 | 0.1251857 | -0.3869994 | 0.2663452 |
| Least  | Audience outdegree | -11        | 0.0651160  | 0.0527129 | -0.0724385 | 0.2026704 |
| Least  | Audience outdegree | -10        | -0.0320829 | 0.0749191 | -0.2275845 | 0.1634188 |
| Least  | Audience outdegree | -9         | -0.0486520 | 0.0852812 | -0.2711934 | 0.1738894 |
| Least  | Audience outdegree | -8         | -0.0396431 | 0.0828800 | -0.2559187 | 0.1766324 |
| Least  | Audience outdegree | -7         | 0.0194206  | 0.0401304 | -0.0852998 | 0.1241411 |
| Least  | Audience outdegree | -6         | -0.0761384 | 0.0908069 | -0.3130993 | 0.1608225 |
| Least  | Audience outdegree | -5         | -0.0041181 | 0.0517393 | -0.1391320 | 0.1308958 |
| Least  | Audience outdegree | -4         | 0.0932403  | 0.1250007 | -0.2329494 | 0.4194300 |
| Least  | Audience outdegree | -3         | -0.0823253 | 0.0961069 | -0.3331164 | 0.1684658 |
| Least  | Audience outdegree | -2         | -0.0564133 | 0.1224644 | -0.3759845 | 0.2631580 |
| Least  | Audience outdegree | -1         | -0.0653866 | 0.0542194 | -0.2068721 | 0.0760990 |
| Least  | Audience outdegree | 0          | -0.0305738 | 0.1027701 | -0.2987525 | 0.2376049 |
| Least  | Audience outdegree | 1          | -0.0563444 | 0.1791453 | -0.5238245 | 0.4111357 |
| Least  | Audience outdegree | 2          | -0.0147934 | 0.1743493 | -0.4697584 | 0.4401716 |
| Least  | Audience outdegree | 3          | 0.0071963  | 0.1306148 | -0.3336433 | 0.3480359 |
| Least  | Audience outdegree | 4          | -0.0211948 | 0.3026202 | -0.8108829 | 0.7684933 |

|       |                    |    |            |           |            |           |
|-------|--------------------|----|------------|-----------|------------|-----------|
| Least | Audience outdegree | 5  | -0.0223939 | 0.2734696 | -0.7360133 | 0.6912256 |
| Least | Audience outdegree | 6  | -0.0709034 | 0.2111537 | -0.6219094 | 0.4801026 |
| Least | Audience outdegree | 7  | -0.0242385 | 0.1889381 | -0.5172728 | 0.4687959 |
| Least | Audience outdegree | 8  | -0.0728409 | 0.1198156 | -0.3855000 | 0.2398182 |
| Least | Audience outdegree | 9  | -0.0027524 | 0.1676808 | -0.4403158 | 0.4348111 |
| Least | Audience outdegree | 10 | -0.0420765 | 0.1876055 | -0.5316335 | 0.4474805 |
| Least | Audience outdegree | 11 | -0.0348460 | 0.1884604 | -0.5266338 | 0.4569417 |
| Least | Audience outdegree | 12 | -0.0204018 | 0.1420164 | -0.3909940 | 0.3501904 |
| Least | Audience outdegree | 13 | -0.1515167 | 0.0763166 | -0.3506651 | 0.0476317 |
| Least | Audience outdegree | 14 | -0.1111122 | 0.1373898 | -0.4696312 | 0.2474067 |
| Least | Audience outdegree | 15 | -0.0736874 | 0.2501586 | -0.7264768 | 0.5791021 |
| Least | Audience outdegree | 16 | -0.0909340 | 0.3598403 | -1.0299380 | 0.8480701 |
| Least | Audience outdegree | 17 | -0.1477405 | 0.6208696 | -1.7679012 | 1.4724201 |
| Least | Audience outdegree | 18 | -0.1163621 | 0.6909866 | -1.9194932 | 1.6867690 |
| Least | Audience outdegree | 19 | -0.2756723 | 0.3948414 | -1.3060118 | 0.7546671 |
| Least | Audience outdegree | 20 | -0.1534935 | 0.2202179 | -0.7281527 | 0.4211657 |
| Least | Audience outdegree | 21 | -0.2449494 | 0.3628945 | -1.1919235 | 0.7020247 |
| Least | Audience outdegree | 22 | -0.2305398 | 0.4722455 | -1.4628654 | 1.0017859 |
| Least | Audience outdegree | 23 | -0.2746101 | 0.5109109 | -1.6078331 | 1.0586129 |
| Least | Audience outdegree | 24 | -0.2155779 | 0.3259699 | -1.0661971 | 0.6350414 |
| Least | Audience outdegree | 25 | -0.1829890 | 0.4516989 | -1.3616983 | 0.9957203 |
| Least | Audience outdegree | 26 | -0.2603832 | 0.4705604 | -1.4883116 | 0.9675452 |
| Least | Audience outdegree | 27 | -0.5477232 | 0.7609174 | -2.5333387 | 1.4378924 |
| Least | Audience outdegree | 28 | -0.6521926 | 1.9650312 | -5.7799460 | 4.4755607 |
| Least | Audience outdegree | 29 | -0.6190389 | 0.7793521 | -2.6527599 | 1.4146820 |
| Least | Audience outdegree | 30 | -0.7374253 | 1.3252624 | -4.1957004 | 2.7208498 |

## Audience indegree

Average effect by length of exposure (Callaway and Sant'Anna)

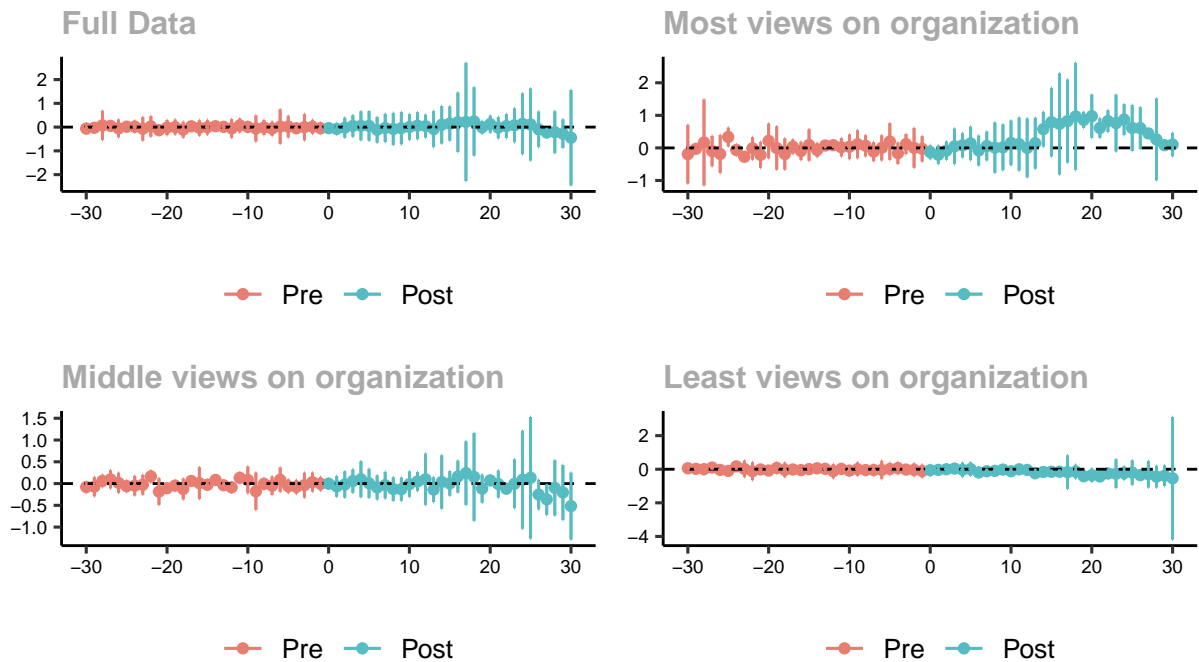

Long timeframe with sampled control groups

| sample | outcome           | event.time | estimate   | std.error | conf.low   | conf.high |
|--------|-------------------|------------|------------|-----------|------------|-----------|
| Full   | Audience indegree | -30        | -0.0622278 | 0.0448286 | -0.2669426 | 0.1424871 |
| Full   | Audience indegree | -29        | -0.0274293 | 0.0385288 | -0.2033752 | 0.1485167 |
| Full   | Audience indegree | -28        | 0.0701232  | 0.1340926 | -0.5422257 | 0.6824721 |
| Full   | Audience indegree | -27        | 0.0508697  | 0.0352226 | -0.1099780 | 0.2117175 |
| Full   | Audience indegree | -26        | -0.0532243 | 0.0813470 | -0.4247047 | 0.3182560 |
| Full   | Audience indegree | -25        | 0.0173417  | 0.0395845 | -0.1634256 | 0.1981089 |
| Full   | Audience indegree | -24        | 0.0197395  | 0.0549392 | -0.2311467 | 0.2706257 |
| Full   | Audience indegree | -23        | -0.0695411 | 0.1085062 | -0.5650467 | 0.4259645 |
| Full   | Audience indegree | -22        | 0.0308647  | 0.0943969 | -0.4002094 | 0.4619387 |
| Full   | Audience indegree | -21        | -0.1294226 | 0.0444888 | -0.3325856 | 0.0737405 |
| Full   | Audience indegree | -20        | -0.0190657 | 0.0696074 | -0.3369357 | 0.2988043 |
| Full   | Audience indegree | -19        | 0.0020387  | 0.0687930 | -0.3121125 | 0.3161899 |
| Full   | Audience indegree | -18        | -0.1066368 | 0.0726226 | -0.4382759 | 0.2250024 |
| Full   | Audience indegree | -17        | 0.0336302  | 0.0362530 | -0.1319233 | 0.1991837 |
| Full   | Audience indegree | -16        | -0.0296890 | 0.0715878 | -0.3566028 | 0.2972248 |
| Full   | Audience indegree | -15        | -0.0050236 | 0.0671774 | -0.3117970 | 0.3017497 |
| Full   | Audience indegree | -14        | 0.0377399  | 0.0171916 | -0.0407676 | 0.1162473 |
| Full   | Audience indegree | -13        | 0.0112261  | 0.0422424 | -0.1816785 | 0.2041308 |
| Full   | Audience indegree | -12        | -0.0526948 | 0.0856392 | -0.4437761 | 0.3383865 |

|      |                   |     |            |           |            |            |
|------|-------------------|-----|------------|-----------|------------|------------|
| Full | Audience indegree | -11 | 0.0701256  | 0.0636060 | -0.2203382 | 0.3605894  |
| Full | Audience indegree | -10 | 0.0079959  | 0.0467291 | -0.2053976 | 0.2213895  |
| Full | Audience indegree | -9  | -0.0572014 | 0.1192113 | -0.6015932 | 0.4871905  |
| Full | Audience indegree | -8  | -0.0134663 | 0.0688511 | -0.3278827 | 0.3009501  |
| Full | Audience indegree | -7  | -0.0640393 | 0.0651685 | -0.3616385 | 0.2335599  |
| Full | Audience indegree | -6  | 0.0208338  | 0.1581460 | -0.7013576 | 0.7430251  |
| Full | Audience indegree | -5  | 0.0214028  | 0.0993273 | -0.4321864 | 0.4749919  |
| Full | Audience indegree | -4  | -0.0469534 | 0.0396084 | -0.2278297 | 0.1339229  |
| Full | Audience indegree | -3  | -0.0006279 | 0.1208359 | -0.5524387 | 0.5511828  |
| Full | Audience indegree | -2  | 0.0120963  | 0.0643243 | -0.2816480 | 0.3058406  |
| Full | Audience indegree | -1  | -0.0472769 | 0.0502611 | -0.2768001 | 0.1822462  |
| Full | Audience indegree | 0   | -0.0437712 | 0.0253896 | -0.1597156 | 0.0721731  |
| Full | Audience indegree | 1   | -0.0770129 | 0.0531172 | -0.3195785 | 0.1655526  |
| Full | Audience indegree | 2   | -0.0232236 | 0.0916976 | -0.4419712 | 0.3955240  |
| Full | Audience indegree | 3   | 0.0494692  | 0.0991466 | -0.4032950 | 0.5022334  |
| Full | Audience indegree | 4   | 0.0536112  | 0.1329129 | -0.5533507 | 0.6605731  |
| Full | Audience indegree | 5   | 0.0507972  | 0.1356637 | -0.5687262 | 0.6703206  |
| Full | Audience indegree | 6   | -0.1137061 | 0.1179539 | -0.6523560 | 0.4249437  |
| Full | Audience indegree | 7   | -0.0360031 | 0.1296011 | -0.6278414 | 0.5558351  |
| Full | Audience indegree | 8   | -0.0772847 | 0.1477217 | -0.7518723 | 0.5973029  |
| Full | Audience indegree | 9   | -0.0443424 | 0.1482925 | -0.7215367 | 0.6328518  |
| Full | Audience indegree | 10  | 0.0047499  | 0.1174586 | -0.5316382 | 0.5411381  |
| Full | Audience indegree | 11  | 0.0596079  | 0.1240204 | -0.5067450 | 0.6259609  |
| Full | Audience indegree | 12  | 0.0426347  | 0.1051083 | -0.4373542 | 0.5226236  |
| Full | Audience indegree | 13  | -0.0817604 | 0.1657180 | -0.8385303 | 0.6750096  |
| Full | Audience indegree | 14  | 0.0980124  | 0.1719591 | -0.6872583 | 0.8832830  |
| Full | Audience indegree | 15  | 0.1505586  | 0.1569647 | -0.5662382 | 0.8673555  |
| Full | Audience indegree | 16  | 0.2040689  | 0.2735153 | -1.0449696 | 1.4531073  |
| Full | Audience indegree | 17  | 0.2177983  | 0.5442800 | -2.2677179 | 2.7033145  |
| Full | Audience indegree | 18  | 0.2386842  | 0.3141709 | -1.1960125 | 1.6733809  |
| Full | Audience indegree | 19  | -0.0071712 | 0.0588241 | -0.2757981 | 0.2614557  |
| Full | Audience indegree | 20  | 0.1263533  | 0.0780010 | -0.2298469 | 0.4825536  |
| Full | Audience indegree | 21  | -0.0219131 | 0.0981015 | -0.4699048 | 0.4260787  |
| Full | Audience indegree | 22  | 0.0445731  | 0.1093294 | -0.4546920 | 0.5438382  |
| Full | Audience indegree | 23  | 0.0764048  | 0.1550152 | -0.6314897 | 0.7842994  |
| Full | Audience indegree | 24  | 0.1390048  | 0.2800718 | -1.1399746 | 1.4179842  |
| Full | Audience indegree | 25  | 0.1094430  | 0.3313923 | -1.4038974 | 1.6227834  |
| Full | Audience indegree | 26  | -0.0934665 | 0.1630050 | -0.8378471 | 0.6509140  |
| Full | Audience indegree | 27  | -0.2272232 | 0.0440258 | -0.4282719 | -0.0261745 |
| Full | Audience indegree | 28  | -0.2139384 | 0.1926356 | -1.0936308 | 0.6657540  |
| Full | Audience indegree | 29  | -0.2771483 | 0.1312045 | -0.8763083 | 0.3220118  |

|      |                   |    |            |           |            |           |
|------|-------------------|----|------------|-----------|------------|-----------|
| Full | Audience indegree | 30 | -0.4475367 | 0.4383839 | -2.4494661 | 1.5543927 |
|------|-------------------|----|------------|-----------|------------|-----------|

| sample | outcome           | event.time | estimate   | std.error | conf.low   | conf.high  |
|--------|-------------------|------------|------------|-----------|------------|------------|
| Most   | Audience indegree | -30        | -0.1922646 | 0.3514078 | -1.0915499 | 0.7070207  |
| Most   | Audience indegree | -29        | -0.0288294 | 0.0438914 | -0.1411517 | 0.0834929  |
| Most   | Audience indegree | -28        | 0.1673824  | 0.5143540 | -1.1488977 | 1.4836624  |
| Most   | Audience indegree | -27        | -0.0976880 | 0.1819176 | -0.5632322 | 0.3678561  |
| Most   | Audience indegree | -26        | -0.1876817 | 0.2274420 | -0.7697270 | 0.3943637  |
| Most   | Audience indegree | -25        | 0.3347890  | 0.1119138 | 0.0483913  | 0.6211868  |
| Most   | Audience indegree | -24        | -0.0631516 | 0.0681755 | -0.2376191 | 0.1113158  |
| Most   | Audience indegree | -23        | -0.2729585 | 0.0540162 | -0.4111911 | -0.1347259 |
| Most   | Audience indegree | -22        | -0.0131073 | 0.1346812 | -0.3577691 | 0.3315545  |
| Most   | Audience indegree | -21        | -0.2145582 | 0.1561597 | -0.6141854 | 0.1850690  |
| Most   | Audience indegree | -20        | 0.2146003  | 0.2074817 | -0.3163649 | 0.7455655  |
| Most   | Audience indegree | -19        | -0.0043553 | 0.2587644 | -0.6665575 | 0.6578469  |
| Most   | Audience indegree | -18        | -0.1882421 | 0.1862272 | -0.6648149 | 0.2883306  |
| Most   | Audience indegree | -17        | 0.0341910  | 0.0870335 | -0.1885359 | 0.2569178  |
| Most   | Audience indegree | -16        | -0.0949709 | 0.1096703 | -0.3756275 | 0.1856856  |
| Most   | Audience indegree | -15        | 0.0905028  | 0.1879472 | -0.3904717 | 0.5714773  |
| Most   | Audience indegree | -14        | -0.0646046 | 0.0852439 | -0.2827517 | 0.1535425  |
| Most   | Audience indegree | -13        | 0.0732400  | 0.0361610 | -0.0192993 | 0.1657793  |
| Most   | Audience indegree | -12        | 0.0832766  | 0.0365952 | -0.0103739 | 0.1769271  |
| Most   | Audience indegree | -11        | 0.0194496  | 0.1092661 | -0.2601726 | 0.2990719  |
| Most   | Audience indegree | -10        | 0.0338048  | 0.1474840 | -0.3436205 | 0.4112301  |
| Most   | Audience indegree | -9         | 0.1127572  | 0.1672146 | -0.3151606 | 0.5406750  |
| Most   | Audience indegree | -8         | 0.0648583  | 0.1267442 | -0.2594920 | 0.3892086  |
| Most   | Audience indegree | -7         | -0.1135799 | 0.1146850 | -0.4070696 | 0.1799098  |
| Most   | Audience indegree | -6         | 0.0011665  | 0.1500934 | -0.3829365 | 0.3852694  |
| Most   | Audience indegree | -5         | 0.1948498  | 0.2199037 | -0.3679044 | 0.7576041  |
| Most   | Audience indegree | -4         | -0.1624838 | 0.1278861 | -0.4897562 | 0.1647887  |
| Most   | Audience indegree | -3         | 0.1161736  | 0.1191858 | -0.1888340 | 0.4211812  |
| Most   | Audience indegree | -2         | 0.0015454  | 0.2384929 | -0.6087801 | 0.6118710  |
| Most   | Audience indegree | -1         | -0.0285324 | 0.1512706 | -0.4156480 | 0.3585833  |
| Most   | Audience indegree | 0          | -0.1290461 | 0.0839624 | -0.3439137 | 0.0858216  |
| Most   | Audience indegree | 1          | -0.2087676 | 0.1097943 | -0.4897414 | 0.0722063  |
| Most   | Audience indegree | 2          | -0.0838295 | 0.1098522 | -0.3649516 | 0.1972926  |
| Most   | Audience indegree | 3          | 0.0473639  | 0.2124086 | -0.4962095 | 0.5909373  |
| Most   | Audience indegree | 4          | 0.0785742  | 0.1451899 | -0.2929804 | 0.4501288  |
| Most   | Audience indegree | 5          | 0.1375647  | 0.2003568 | -0.3751670 | 0.6502963  |
| Most   | Audience indegree | 6          | -0.0809295 | 0.1786690 | -0.5381601 | 0.3763011  |
| Most   | Audience indegree | 7          | 0.0585079  | 0.1722671 | -0.3823398 | 0.4993556  |

|      |                   |    |            |           |            |           |
|------|-------------------|----|------------|-----------|------------|-----------|
| Most | Audience indegree | 8  | 0.0086195  | 0.3010271 | -0.7617369 | 0.7789759 |
| Most | Audience indegree | 9  | 0.0173932  | 0.2743116 | -0.6845958 | 0.7193822 |
| Most | Audience indegree | 10 | 0.1535052  | 0.2670037 | -0.5297823 | 0.8367926 |
| Most | Audience indegree | 11 | 0.1171867  | 0.3176692 | -0.6957584 | 0.9301318 |
| Most | Audience indegree | 12 | -0.0005944 | 0.3525443 | -0.9027882 | 0.9015993 |
| Most | Audience indegree | 13 | 0.1442174  | 0.3042420 | -0.6343663 | 0.9228011 |
| Most | Audience indegree | 14 | 0.5747427  | 0.2072650 | 0.0443322  | 1.1051533 |
| Most | Audience indegree | 15 | 0.7914774  | 0.4103961 | -0.2587644 | 1.8417193 |
| Most | Audience indegree | 16 | 0.7371113  | 0.6067041 | -0.8155012 | 2.2897238 |
| Most | Audience indegree | 17 | 0.8244744  | 0.4971446 | -0.4477651 | 2.0967139 |
| Most | Audience indegree | 18 | 0.9669461  | 0.6424056 | -0.6770297 | 2.6109220 |
| Most | Audience indegree | 19 | 0.8596768  | 0.0971071 | 0.6111707  | 1.1081828 |
| Most | Audience indegree | 20 | 0.9733069  | 0.2588735 | 0.3108254  | 1.6357884 |
| Most | Audience indegree | 21 | 0.6116829  | 0.1169708 | 0.3123438  | 0.9110221 |
| Most | Audience indegree | 22 | 0.8231308  | 0.1304454 | 0.4893089  | 1.1569527 |
| Most | Audience indegree | 23 | 0.7619028  | 0.3395852 | -0.1071274 | 1.6309329 |
| Most | Audience indegree | 24 | 0.8688190  | 0.1844479 | 0.3967996  | 1.3408384 |
| Most | Audience indegree | 25 | 0.6125684  | 0.2758546 | -0.0933692 | 1.3185061 |
| Most | Audience indegree | 26 | 0.6082773  | 0.2488329 | -0.0285093 | 1.2450639 |
| Most | Audience indegree | 27 | 0.4445745  | 0.0269039 | 0.3757248  | 0.5134242 |
| Most | Audience indegree | 28 | 0.2615682  | 0.4901909 | -0.9928761 | 1.5160124 |
| Most | Audience indegree | 29 | 0.0831006  | 0.0203969 | 0.0309030  | 0.1352983 |
| Most | Audience indegree | 30 | 0.1029947  | 0.1401557 | -0.2556768 | 0.4616663 |

| sample | outcome           | event.time | estimate   | std.error | conf.low   | conf.high  |
|--------|-------------------|------------|------------|-----------|------------|------------|
| Middle | Audience indegree | -30        | -0.0804420 | 0.0521806 | -0.2010634 | 0.0401794  |
| Middle | Audience indegree | -29        | -0.0699507 | 0.0953235 | -0.2903017 | 0.1504003  |
| Middle | Audience indegree | -28        | 0.0601313  | 0.0613241 | -0.0816264 | 0.2018889  |
| Middle | Audience indegree | -27        | 0.0966162  | 0.0891269 | -0.1094107 | 0.3026431  |
| Middle | Audience indegree | -26        | 0.0161135  | 0.1004615 | -0.2161146 | 0.2483416  |
| Middle | Audience indegree | -25        | -0.0601599 | 0.0582863 | -0.1948952 | 0.0745754  |
| Middle | Audience indegree | -24        | -0.0483457 | 0.0970213 | -0.2726215 | 0.1759301  |
| Middle | Audience indegree | -23        | -0.0264259 | 0.0985060 | -0.2541338 | 0.2012819  |
| Middle | Audience indegree | -22        | 0.1641069  | 0.0582665 | 0.0294174  | 0.2987964  |
| Middle | Audience indegree | -21        | -0.1835991 | 0.1318661 | -0.4884225 | 0.1212243  |
| Middle | Audience indegree | -20        | -0.1057060 | 0.0390828 | -0.1960503 | -0.0153618 |
| Middle | Audience indegree | -19        | -0.0470837 | 0.0528339 | -0.1692152 | 0.0750477  |
| Middle | Audience indegree | -18        | -0.1249891 | 0.1027055 | -0.3624045 | 0.1124263  |
| Middle | Audience indegree | -17        | 0.0590983  | 0.0222333 | 0.0077035  | 0.1104931  |
| Middle | Audience indegree | -16        | 0.0095773  | 0.1576467 | -0.3548409 | 0.3739954  |
| Middle | Audience indegree | -15        | -0.0275670 | 0.0489939 | -0.1408219 | 0.0856879  |



|        |                   |     |            |           |            |            |
|--------|-------------------|-----|------------|-----------|------------|------------|
| Middle | Audience indegree | -14 | 0.0834928  | 0.0441729 | -0.0186179 | 0.1856035  |
| Middle | Audience indegree | -13 | -0.0386815 | 0.0393056 | -0.1295408 | 0.0521779  |
| Middle | Audience indegree | -12 | -0.0868527 | 0.0510700 | -0.2049067 | 0.0312014  |
| Middle | Audience indegree | -11 | 0.1329235  | 0.0518565 | 0.0130513  | 0.2527957  |
| Middle | Audience indegree | -10 | 0.0837065  | 0.1325179 | -0.2226236 | 0.3900366  |
| Middle | Audience indegree | -9  | -0.1772149 | 0.1853400 | -0.6056492 | 0.2512194  |
| Middle | Audience indegree | -8  | -0.0053388 | 0.0563658 | -0.1356346 | 0.1249571  |
| Middle | Audience indegree | -7  | -0.0491660 | 0.0916572 | -0.2610419 | 0.1627099  |
| Middle | Audience indegree | -6  | 0.0880532  | 0.1212832 | -0.1923066 | 0.3684129  |
| Middle | Audience indegree | -5  | -0.0614439 | 0.0673027 | -0.2170217 | 0.0941338  |
| Middle | Audience indegree | -4  | -0.0760038 | 0.0692925 | -0.2361812 | 0.0841735  |
| Middle | Audience indegree | -3  | -0.0353082 | 0.1231040 | -0.3198770 | 0.2492606  |
| Middle | Audience indegree | -2  | 0.0336349  | 0.0939635 | -0.1835724 | 0.2508422  |
| Middle | Audience indegree | -1  | -0.0054328 | 0.0680686 | -0.1627811 | 0.1519155  |
| Middle | Audience indegree | 0   | -0.0028958 | 0.0493154 | -0.1168940 | 0.1111023  |
| Middle | Audience indegree | 1   | -0.0647272 | 0.1032556 | -0.3034143 | 0.1739599  |
| Middle | Audience indegree | 2   | -0.0206024 | 0.1297962 | -0.3206410 | 0.2794362  |
| Middle | Audience indegree | 3   | 0.0571300  | 0.1163934 | -0.2119265 | 0.3261864  |
| Middle | Audience indegree | 4   | 0.0995620  | 0.1780767 | -0.3120825 | 0.5112065  |
| Middle | Audience indegree | 5   | 0.0058430  | 0.1439687 | -0.3269569 | 0.3386430  |
| Middle | Audience indegree | 6   | -0.0886746 | 0.1190313 | -0.3638289 | 0.1864798  |
| Middle | Audience indegree | 7   | -0.0369256 | 0.1319815 | -0.3420157 | 0.2681645  |
| Middle | Audience indegree | 8   | -0.1257176 | 0.1156966 | -0.3931634 | 0.1417282  |
| Middle | Audience indegree | 9   | -0.1294191 | 0.1146093 | -0.3943514 | 0.1355132  |
| Middle | Audience indegree | 10  | -0.0131539 | 0.1255150 | -0.3032961 | 0.2769883  |
| Middle | Audience indegree | 11  | 0.0473707  | 0.0939780 | -0.1698702 | 0.2646116  |
| Middle | Audience indegree | 12  | 0.0981885  | 0.2546696 | -0.4905092 | 0.6868861  |
| Middle | Audience indegree | 13  | -0.1392422 | 0.1229600 | -0.4234782 | 0.1449939  |
| Middle | Audience indegree | 14  | 0.0352896  | 0.2655153 | -0.5784791 | 0.6490582  |
| Middle | Audience indegree | 15  | 0.0038198  | 0.1214768 | -0.2769875 | 0.2846270  |
| Middle | Audience indegree | 16  | 0.1610754  | 0.1582062 | -0.2046362 | 0.5267870  |
| Middle | Audience indegree | 17  | 0.2393371  | 0.3153449 | -0.4896183 | 0.9682926  |
| Middle | Audience indegree | 18  | 0.1537273  | 0.4348015 | -0.8513655 | 1.1588201  |
| Middle | Audience indegree | 19  | -0.1171012 | 0.1390862 | -0.4386148 | 0.2044124  |
| Middle | Audience indegree | 20  | 0.0731730  | 0.0455104 | -0.0320296 | 0.1783755  |
| Middle | Audience indegree | 21  | -0.0111522 | 0.1335382 | -0.3198409 | 0.2975365  |
| Middle | Audience indegree | 22  | -0.1180037 | 0.0345935 | -0.1979705 | -0.0380368 |
| Middle | Audience indegree | 23  | -0.0041750 | 0.2421226 | -0.5638687 | 0.5555187  |
| Middle | Audience indegree | 24  | 0.0888956  | 0.4858248 | -1.0341434 | 1.2119346  |
| Middle | Audience indegree | 25  | 0.1318281  | 0.6035177 | -1.2632713 | 1.5269275  |
| Middle | Audience indegree | 26  | -0.2524191 | 0.1465758 | -0.5912457 | 0.0864075  |

|        |                   |    |            |           |            |            |
|--------|-------------------|----|------------|-----------|------------|------------|
| Middle | Audience indegree | 27 | -0.3620935 | 0.1541097 | -0.7183355 | -0.0058515 |
| Middle | Audience indegree | 28 | -0.0988848 | 0.2742499 | -0.7328444 | 0.5350748  |
| Middle | Audience indegree | 29 | -0.2060742 | 0.2727480 | -0.8365621 | 0.4244137  |
| Middle | Audience indegree | 30 | -0.5175872 | 0.3317460 | -1.2844555 | 0.2492812  |

| sample | outcome           | event.time | estimate   | std.error | conf.low   | conf.high |
|--------|-------------------|------------|------------|-----------|------------|-----------|
| Least  | Audience indegree | -30        | 0.0557925  | 0.0709010 | -0.1159134 | 0.2274983 |
| Least  | Audience indegree | -29        | 0.0220293  | 0.0650499 | -0.1355067 | 0.1795652 |
| Least  | Audience indegree | -28        | 0.0040830  | 0.1245273 | -0.2974934 | 0.3056594 |
| Least  | Audience indegree | -27        | 0.0986068  | 0.0557569 | -0.0364237 | 0.2336373 |
| Least  | Audience indegree | -26        | -0.0425734 | 0.0494291 | -0.1622794 | 0.0771325 |
| Least  | Audience indegree | -25        | -0.0999663 | 0.0977158 | -0.3366114 | 0.1366788 |
| Least  | Audience indegree | -24        | 0.1719861  | 0.0887784 | -0.0430146 | 0.3869869 |
| Least  | Audience indegree | -23        | 0.0196952  | 0.2018683 | -0.4691834 | 0.5085738 |
| Least  | Audience indegree | -22        | -0.1192758 | 0.2189744 | -0.6495815 | 0.4110298 |
| Least  | Audience indegree | -21        | -0.0133140 | 0.0567172 | -0.1506699 | 0.1240419 |
| Least  | Audience indegree | -20        | -0.0782403 | 0.0441779 | -0.1852291 | 0.0287484 |
| Least  | Audience indegree | -19        | 0.0747850  | 0.1327896 | -0.2468009 | 0.3963710 |
| Least  | Audience indegree | -18        | -0.0410285 | 0.1784189 | -0.4731179 | 0.3910610 |
| Least  | Audience indegree | -17        | -0.0137984 | 0.0433575 | -0.1188003 | 0.0912034 |
| Least  | Audience indegree | -16        | -0.0521503 | 0.0718622 | -0.2261840 | 0.1218834 |
| Least  | Audience indegree | -15        | 0.0071400  | 0.0700112 | -0.1624111 | 0.1766911 |
| Least  | Audience indegree | -14        | 0.0530181  | 0.1014483 | -0.1926663 | 0.2987025 |
| Least  | Audience indegree | -13        | 0.0240005  | 0.1230305 | -0.2739511 | 0.3219522 |
| Least  | Audience indegree | -12        | -0.1136830 | 0.1748477 | -0.5371239 | 0.3097578 |
| Least  | Audience indegree | -11        | 0.0201682  | 0.0714186 | -0.1527911 | 0.1931276 |
| Least  | Audience indegree | -10        | -0.0843060 | 0.1143829 | -0.3613151 | 0.1927031 |
| Least  | Audience indegree | -9         | 0.0045108  | 0.1632170 | -0.3907634 | 0.3997849 |
| Least  | Audience indegree | -8         | -0.0499038 | 0.1011778 | -0.2949333 | 0.1951256 |
| Least  | Audience indegree | -7         | -0.0486914 | 0.1326067 | -0.3698344 | 0.2724517 |
| Least  | Audience indegree | -6         | -0.0421466 | 0.2237318 | -0.5839735 | 0.4996804 |
| Least  | Audience indegree | -5         | 0.0143358  | 0.1499461 | -0.3487991 | 0.3774707 |
| Least  | Audience indegree | -4         | 0.0652627  | 0.1464814 | -0.2894815 | 0.4200069 |
| Least  | Audience indegree | -3         | -0.0200644 | 0.0714641 | -0.1931341 | 0.1530052 |
| Least  | Audience indegree | -2         | -0.0383057 | 0.1561812 | -0.4165406 | 0.3399291 |
| Least  | Audience indegree | -1         | -0.1102014 | 0.1571844 | -0.4908659 | 0.2704631 |
| Least  | Audience indegree | 0          | -0.0590556 | 0.1269532 | -0.3665072 | 0.2483959 |
| Least  | Audience indegree | 1          | -0.0397038 | 0.0850707 | -0.2457254 | 0.1663179 |
| Least  | Audience indegree | 2          | -0.0010486 | 0.0671590 | -0.1636923 | 0.1615951 |
| Least  | Audience indegree | 3          | 0.0385662  | 0.0448376 | -0.0700202 | 0.1471525 |
| Least  | Audience indegree | 4          | -0.0329982 | 0.1740762 | -0.4545707 | 0.3885742 |

|       |                   |    |            |           |            |            |
|-------|-------------------|----|------------|-----------|------------|------------|
| Least | Audience indegree | 5  | 0.0083491  | 0.1631735 | -0.3868195 | 0.4035177  |
| Least | Audience indegree | 6  | -0.1911611 | 0.1279370 | -0.5009950 | 0.1186729  |
| Least | Audience indegree | 7  | -0.1199670 | 0.0707606 | -0.2913328 | 0.0513989  |
| Least | Audience indegree | 8  | -0.0986102 | 0.1101138 | -0.3652805 | 0.1680601  |
| Least | Audience indegree | 9  | -0.0223489 | 0.0989823 | -0.2620613 | 0.2173635  |
| Least | Audience indegree | 10 | -0.1182643 | 0.0937189 | -0.3452298 | 0.1087012  |
| Least | Audience indegree | 11 | -0.0071019 | 0.1127966 | -0.2802694 | 0.2660656  |
| Least | Audience indegree | 12 | -0.0424160 | 0.1087939 | -0.3058898 | 0.2210577  |
| Least | Audience indegree | 13 | -0.2358012 | 0.1143333 | -0.5126902 | 0.0410878  |
| Least | Audience indegree | 14 | -0.1634707 | 0.0970215 | -0.3984344 | 0.0714930  |
| Least | Audience indegree | 15 | -0.1512506 | 0.0535491 | -0.2809342 | -0.0215670 |
| Least | Audience indegree | 16 | -0.1481031 | 0.0577489 | -0.2879576 | -0.0082486 |
| Least | Audience indegree | 17 | -0.1756389 | 0.4111659 | -1.1713881 | 0.8201103  |
| Least | Audience indegree | 18 | -0.1418882 | 0.1693102 | -0.5519186 | 0.2681423  |
| Least | Audience indegree | 19 | -0.4178008 | 0.0796862 | -0.6107824 | -0.2248192 |
| Least | Audience indegree | 20 | -0.3532199 | 0.1648361 | -0.7524151 | 0.0459753  |
| Least | Audience indegree | 21 | -0.4316498 | 0.0372547 | -0.5218721 | -0.3414274 |
| Least | Audience indegree | 22 | -0.2517867 | 0.1088017 | -0.5152794 | 0.0117060  |
| Least | Audience indegree | 23 | -0.2628111 | 0.3515316 | -1.1141399 | 0.5885176  |
| Least | Audience indegree | 24 | -0.2318117 | 0.1630629 | -0.6267126 | 0.1630892  |
| Least | Audience indegree | 25 | -0.2001344 | 0.2992753 | -0.9249104 | 0.5246416  |
| Least | Audience indegree | 26 | -0.3502086 | 0.0918812 | -0.5727239 | -0.1276934 |
| Least | Audience indegree | 27 | -0.2962073 | 0.3253641 | -1.0841644 | 0.4917497  |
| Least | Audience indegree | 28 | -0.4422725 | 0.2658966 | -1.0862129 | 0.2016679  |
| Least | Audience indegree | 29 | -0.3847285 | 0.2518550 | -0.9946635 | 0.2252065  |
| Least | Audience indegree | 30 | -0.5396208 | 1.5045343 | -4.1832570 | 3.1040153  |

## Audience outdegree/total outdegree

Average effect by length of exposure (Callaway and Sant'Anna)

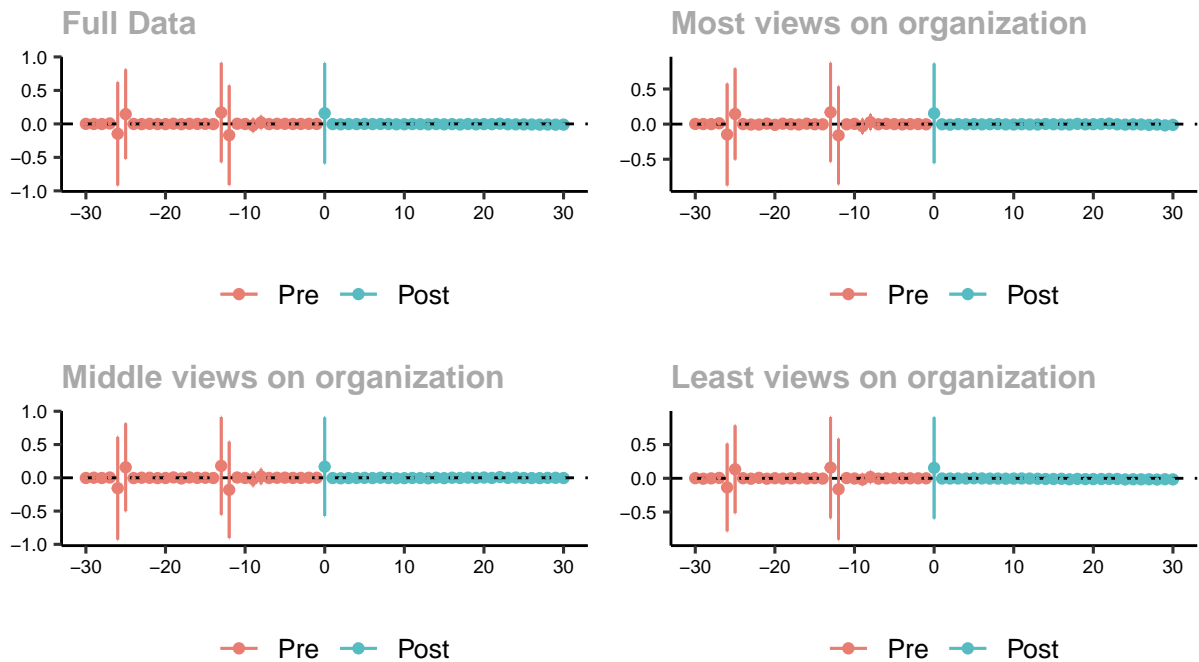

Long timeframe with sampled control groups

| sample | outcome                            | event.time | estimate   | std.error | conf.low   | conf.high  |
|--------|------------------------------------|------------|------------|-----------|------------|------------|
| Full   | Audience outdegree/total outdegree | -30        | 0.0003838  | 0.0021176 | -0.0045275 | 0.0052950  |
| Full   | Audience outdegree/total outdegree | -29        | -0.0013132 | 0.0032417 | -0.0088316 | 0.0062052  |
| Full   | Audience outdegree/total outdegree | -28        | -0.0017786 | 0.0018367 | -0.0060384 | 0.0024811  |
| Full   | Audience outdegree/total outdegree | -27        | 0.0067362  | 0.0031941 | -0.0006718 | 0.0141443  |
| Full   | Audience outdegree/total outdegree | -26        | -0.1471103 | 0.3319086 | -0.9169056 | 0.6226849  |
| Full   | Audience outdegree/total outdegree | -25        | 0.1458985  | 0.2873663 | -0.5205900 | 0.8123869  |
| Full   | Audience outdegree/total outdegree | -24        | -0.0009786 | 0.0030826 | -0.0081280 | 0.0061708  |
| Full   | Audience outdegree/total outdegree | -23        | -0.0029393 | 0.0024812 | -0.0086939 | 0.0028154  |
| Full   | Audience outdegree/total outdegree | -22        | 0.0008790  | 0.0020298 | -0.0038288 | 0.0055868  |
| Full   | Audience outdegree/total outdegree | -21        | -0.0021262 | 0.0034277 | -0.0100760 | 0.0058236  |
| Full   | Audience outdegree/total outdegree | -20        | -0.0036287 | 0.0048430 | -0.0148610 | 0.0076036  |
| Full   | Audience outdegree/total outdegree | -19        | 0.0024814  | 0.0014585 | -0.0009013 | 0.0058641  |
| Full   | Audience outdegree/total outdegree | -18        | -0.0042995 | 0.0009912 | -0.0065985 | -0.0020005 |
| Full   | Audience outdegree/total outdegree | -17        | 0.0013790  | 0.0019300 | -0.0030973 | 0.0058554  |
| Full   | Audience outdegree/total outdegree | -16        | -0.0000728 | 0.0021640 | -0.0050918 | 0.0049462  |
| Full   | Audience outdegree/total outdegree | -15        | 0.0006964  | 0.0014132 | -0.0025812 | 0.0039739  |
| Full   | Audience outdegree/total outdegree | -14        | -0.0032943 | 0.0019973 | -0.0079266 | 0.0013380  |
| Full   | Audience outdegree/total outdegree | -13        | 0.1695915  | 0.3196696 | -0.5718180 | 0.9110009  |
| Full   | Audience outdegree/total outdegree | -12        | -0.1687070 | 0.3196066 | -0.9099702 | 0.5725562  |

|      |                                    |     |            |           |            |            |
|------|------------------------------------|-----|------------|-----------|------------|------------|
| Full | Audience outdegree/total outdegree | -11 | 0.0022697  | 0.0017547 | -0.0017999 | 0.0063393  |
| Full | Audience outdegree/total outdegree | -10 | -0.0013432 | 0.0037493 | -0.0100389 | 0.0073525  |
| Full | Audience outdegree/total outdegree | -9  | -0.0211289 | 0.0436835 | -0.1224440 | 0.0801863  |
| Full | Audience outdegree/total outdegree | -8  | 0.0218477  | 0.0427759 | -0.0773624 | 0.1210579  |
| Full | Audience outdegree/total outdegree | -7  | -0.0030881 | 0.0016715 | -0.0069648 | 0.0007886  |
| Full | Audience outdegree/total outdegree | -6  | 0.0011012  | 0.0033054 | -0.0065649 | 0.0087673  |
| Full | Audience outdegree/total outdegree | -5  | 0.0010849  | 0.0021430 | -0.0038854 | 0.0060552  |
| Full | Audience outdegree/total outdegree | -4  | -0.0015504 | 0.0014400 | -0.0048903 | 0.0017895  |
| Full | Audience outdegree/total outdegree | -3  | -0.0007774 | 0.0015846 | -0.0044526 | 0.0028979  |
| Full | Audience outdegree/total outdegree | -2  | 0.0005552  | 0.0015298 | -0.0029928 | 0.0041032  |
| Full | Audience outdegree/total outdegree | -1  | -0.0006343 | 0.0014974 | -0.0041074 | 0.0028387  |
| Full | Audience outdegree/total outdegree | 0   | 0.1593345  | 0.3231220 | -0.5900820 | 0.9087510  |
| Full | Audience outdegree/total outdegree | 1   | -0.0031125 | 0.0029386 | -0.0099280 | 0.0037030  |
| Full | Audience outdegree/total outdegree | 2   | -0.0060910 | 0.0019498 | -0.0106132 | -0.0015689 |
| Full | Audience outdegree/total outdegree | 3   | -0.0026385 | 0.0008972 | -0.0047194 | -0.0005576 |
| Full | Audience outdegree/total outdegree | 4   | -0.0030012 | 0.0007745 | -0.0047975 | -0.0012049 |
| Full | Audience outdegree/total outdegree | 5   | -0.0004074 | 0.0032476 | -0.0079395 | 0.0071246  |
| Full | Audience outdegree/total outdegree | 6   | -0.0032798 | 0.0023672 | -0.0087700 | 0.0022104  |
| Full | Audience outdegree/total outdegree | 7   | -0.0015035 | 0.0028534 | -0.0081214 | 0.0051143  |
| Full | Audience outdegree/total outdegree | 8   | -0.0024486 | 0.0022811 | -0.0077391 | 0.0028419  |
| Full | Audience outdegree/total outdegree | 9   | -0.0058024 | 0.0030466 | -0.0128684 | 0.0012636  |
| Full | Audience outdegree/total outdegree | 10  | -0.0051087 | 0.0019102 | -0.0095389 | -0.0006784 |
| Full | Audience outdegree/total outdegree | 11  | -0.0025480 | 0.0015127 | -0.0060565 | 0.0009605  |
| Full | Audience outdegree/total outdegree | 12  | -0.0040675 | 0.0031240 | -0.0113129 | 0.0031780  |
| Full | Audience outdegree/total outdegree | 13  | -0.0066351 | 0.0028005 | -0.0131302 | -0.0001400 |
| Full | Audience outdegree/total outdegree | 14  | -0.0027709 | 0.0015675 | -0.0064064 | 0.0008645  |
| Full | Audience outdegree/total outdegree | 15  | -0.0061789 | 0.0057723 | -0.0195666 | 0.0072088  |
| Full | Audience outdegree/total outdegree | 16  | -0.0034438 | 0.0101653 | -0.0270200 | 0.0201325  |
| Full | Audience outdegree/total outdegree | 17  | -0.0082489 | 0.0111509 | -0.0341113 | 0.0176135  |
| Full | Audience outdegree/total outdegree | 18  | -0.0018021 | 0.0152272 | -0.0371186 | 0.0335144  |
| Full | Audience outdegree/total outdegree | 19  | -0.0061879 | 0.0070461 | -0.0225299 | 0.0101542  |
| Full | Audience outdegree/total outdegree | 20  | -0.0033177 | 0.0058127 | -0.0167991 | 0.0101637  |
| Full | Audience outdegree/total outdegree | 21  | -0.0044188 | 0.0018990 | -0.0088231 | -0.0000145 |
| Full | Audience outdegree/total outdegree | 22  | 0.0021262  | 0.0077001 | -0.0157328 | 0.0199851  |
| Full | Audience outdegree/total outdegree | 23  | -0.0051338 | 0.0116381 | -0.0321261 | 0.0218584  |
| Full | Audience outdegree/total outdegree | 24  | -0.0066674 | 0.0064680 | -0.0216686 | 0.0083339  |
| Full | Audience outdegree/total outdegree | 25  | -0.0069897 | 0.0118322 | -0.0344321 | 0.0204528  |
| Full | Audience outdegree/total outdegree | 26  | -0.0087374 | 0.0047220 | -0.0196892 | 0.0022143  |
| Full | Audience outdegree/total outdegree | 27  | -0.0104885 | 0.0008935 | -0.0125609 | -0.0084161 |
| Full | Audience outdegree/total outdegree | 28  | -0.0091103 | 0.0090666 | -0.0301384 | 0.0119178  |
| Full | Audience outdegree/total outdegree | 29  | -0.0110466 | 0.0007093 | -0.0126917 | -0.0094015 |

|      |                                    |    |            |           |            |            |
|------|------------------------------------|----|------------|-----------|------------|------------|
| Full | Audience outdegree/total outdegree | 30 | -0.0106543 | 0.0007939 | -0.0124957 | -0.0088130 |
|------|------------------------------------|----|------------|-----------|------------|------------|

| sample | outcome                            | event.time | estimate   | std.error | conf.low   | conf.high  |
|--------|------------------------------------|------------|------------|-----------|------------|------------|
| Most   | Audience outdegree/total outdegree | -30        | 0.0025590  | 0.0082190 | -0.0166365 | 0.0217545  |
| Most   | Audience outdegree/total outdegree | -29        | 0.0007498  | 0.0085137 | -0.0191339 | 0.0206334  |
| Most   | Audience outdegree/total outdegree | -28        | -0.0007536 | 0.0047582 | -0.0118664 | 0.0103591  |
| Most   | Audience outdegree/total outdegree | -27        | 0.0119767  | 0.0044879 | 0.0014952  | 0.0224582  |
| Most   | Audience outdegree/total outdegree | -26        | -0.1478870 | 0.3096799 | -0.8711439 | 0.5753699  |
| Most   | Audience outdegree/total outdegree | -25        | 0.1440551  | 0.2774162 | -0.5038499 | 0.7919601  |
| Most   | Audience outdegree/total outdegree | -24        | 0.0006182  | 0.0084163 | -0.0190380 | 0.0202743  |
| Most   | Audience outdegree/total outdegree | -23        | -0.0061156 | 0.0090846 | -0.0273327 | 0.0151015  |
| Most   | Audience outdegree/total outdegree | -22        | -0.0062575 | 0.0062459 | -0.0208449 | 0.0083299  |
| Most   | Audience outdegree/total outdegree | -21        | 0.0065023  | 0.0060926 | -0.0077269 | 0.0207314  |
| Most   | Audience outdegree/total outdegree | -20        | -0.0102402 | 0.0130266 | -0.0406639 | 0.0201834  |
| Most   | Audience outdegree/total outdegree | -19        | 0.0059066  | 0.0075197 | -0.0116555 | 0.0234687  |
| Most   | Audience outdegree/total outdegree | -18        | -0.0015534 | 0.0056196 | -0.0146780 | 0.0115712  |
| Most   | Audience outdegree/total outdegree | -17        | -0.0051435 | 0.0041872 | -0.0149227 | 0.0046357  |
| Most   | Audience outdegree/total outdegree | -16        | 0.0059113  | 0.0063163 | -0.0088404 | 0.0206630  |
| Most   | Audience outdegree/total outdegree | -15        | -0.0022601 | 0.0045948 | -0.0129912 | 0.0084710  |
| Most   | Audience outdegree/total outdegree | -14        | -0.0029247 | 0.0018925 | -0.0073447 | 0.0014952  |
| Most   | Audience outdegree/total outdegree | -13        | 0.1687898  | 0.3009483 | -0.5340744 | 0.8716540  |
| Most   | Audience outdegree/total outdegree | -12        | -0.1601663 | 0.2979475 | -0.8560221 | 0.5356895  |
| Most   | Audience outdegree/total outdegree | -11        | -0.0026824 | 0.0086450 | -0.0228727 | 0.0175079  |
| Most   | Audience outdegree/total outdegree | -10        | 0.0034533  | 0.0076498 | -0.0144127 | 0.0213193  |
| Most   | Audience outdegree/total outdegree | -9         | -0.0291841 | 0.0453329 | -0.1350590 | 0.0766908  |
| Most   | Audience outdegree/total outdegree | -8         | 0.0288607  | 0.0481649 | -0.0836282 | 0.1413497  |
| Most   | Audience outdegree/total outdegree | -7         | -0.0023450 | 0.0030162 | -0.0093893 | 0.0046992  |
| Most   | Audience outdegree/total outdegree | -6         | 0.0038990  | 0.0066049 | -0.0115267 | 0.0193247  |
| Most   | Audience outdegree/total outdegree | -5         | -0.0004447 | 0.0051633 | -0.0125036 | 0.0116143  |
| Most   | Audience outdegree/total outdegree | -4         | -0.0033262 | 0.0034860 | -0.0114678 | 0.0048154  |
| Most   | Audience outdegree/total outdegree | -3         | -0.0004626 | 0.0060020 | -0.0144803 | 0.0135550  |
| Most   | Audience outdegree/total outdegree | -2         | 0.0005710  | 0.0042400 | -0.0093317 | 0.0104736  |
| Most   | Audience outdegree/total outdegree | -1         | -0.0024740 | 0.0038375 | -0.0114364 | 0.0064884  |
| Most   | Audience outdegree/total outdegree | 0          | 0.1535207  | 0.3033706 | -0.5550007 | 0.8620422  |
| Most   | Audience outdegree/total outdegree | 1          | -0.0023983 | 0.0042390 | -0.0122985 | 0.0075018  |
| Most   | Audience outdegree/total outdegree | 2          | -0.0079860 | 0.0020390 | -0.0127480 | -0.0032239 |
| Most   | Audience outdegree/total outdegree | 3          | 0.0005692  | 0.0033415 | -0.0072347 | 0.0083732  |
| Most   | Audience outdegree/total outdegree | 4          | -0.0027731 | 0.0047039 | -0.0137590 | 0.0082128  |
| Most   | Audience outdegree/total outdegree | 5          | -0.0002737 | 0.0064988 | -0.0154517 | 0.0149044  |
| Most   | Audience outdegree/total outdegree | 6          | -0.0032057 | 0.0070041 | -0.0195638 | 0.0131523  |
| Most   | Audience outdegree/total outdegree | 7          | -0.0014980 | 0.0033453 | -0.0093109 | 0.0063149  |

|      |                                    |    |            |           |            |           |
|------|------------------------------------|----|------------|-----------|------------|-----------|
| Most | Audience outdegree/total outdegree | 8  | 0.0005815  | 0.0041869 | -0.0091969 | 0.0103600 |
| Most | Audience outdegree/total outdegree | 9  | -0.0044136 | 0.0114451 | -0.0311435 | 0.0223164 |
| Most | Audience outdegree/total outdegree | 10 | -0.0050399 | 0.0061733 | -0.0194576 | 0.0093778 |
| Most | Audience outdegree/total outdegree | 11 | -0.0015308 | 0.0055633 | -0.0145239 | 0.0114623 |
| Most | Audience outdegree/total outdegree | 12 | -0.0049233 | 0.0071754 | -0.0216816 | 0.0118349 |
| Most | Audience outdegree/total outdegree | 13 | -0.0054426 | 0.0056645 | -0.0186721 | 0.0077869 |
| Most | Audience outdegree/total outdegree | 14 | 0.0014466  | 0.0049475 | -0.0101082 | 0.0130014 |
| Most | Audience outdegree/total outdegree | 15 | -0.0018181 | 0.0081684 | -0.0208952 | 0.0172591 |
| Most | Audience outdegree/total outdegree | 16 | -0.0038403 | 0.0220883 | -0.0554275 | 0.0477468 |
| Most | Audience outdegree/total outdegree | 17 | -0.0058273 | 0.0248877 | -0.0639525 | 0.0522978 |
| Most | Audience outdegree/total outdegree | 18 | 0.0035007  | 0.0221708 | -0.0482790 | 0.0552805 |
| Most | Audience outdegree/total outdegree | 19 | -0.0032928 | 0.0097493 | -0.0260623 | 0.0194768 |
| Most | Audience outdegree/total outdegree | 20 | -0.0012484 | 0.0028760 | -0.0079652 | 0.0054684 |
| Most | Audience outdegree/total outdegree | 21 | 0.0006444  | 0.0132624 | -0.0303300 | 0.0316188 |
| Most | Audience outdegree/total outdegree | 22 | 0.0063770  | 0.0084287 | -0.0133083 | 0.0260623 |
| Most | Audience outdegree/total outdegree | 23 | -0.0027748 | 0.0165926 | -0.0415269 | 0.0359773 |
| Most | Audience outdegree/total outdegree | 24 | -0.0071335 | 0.0172193 | -0.0473491 | 0.0330820 |
| Most | Audience outdegree/total outdegree | 25 | -0.0034385 | 0.0082729 | -0.0227599 | 0.0158829 |
| Most | Audience outdegree/total outdegree | 26 | -0.0051045 | 0.0064448 | -0.0201563 | 0.0099473 |
| Most | Audience outdegree/total outdegree | 27 | -0.0110194 | 0.0127086 | -0.0407002 | 0.0186614 |
| Most | Audience outdegree/total outdegree | 28 | -0.0063741 | 0.0173712 | -0.0469445 | 0.0341963 |
| Most | Audience outdegree/total outdegree | 29 | -0.0175926 | 0.0088838 | -0.0383406 | 0.0031554 |
| Most | Audience outdegree/total outdegree | 30 | -0.0109411 | 0.0120388 | -0.0390577 | 0.0171754 |

| sample | outcome                            | event.time | estimate   | std.error | conf.low   | conf.high  |
|--------|------------------------------------|------------|------------|-----------|------------|------------|
| Middle | Audience outdegree/total outdegree | -30        | -0.0024669 | 0.0024796 | -0.0081727 | 0.0032390  |
| Middle | Audience outdegree/total outdegree | -29        | 0.0015260  | 0.0016536 | -0.0022791 | 0.0053310  |
| Middle | Audience outdegree/total outdegree | -28        | -0.0030367 | 0.0040943 | -0.0124582 | 0.0063847  |
| Middle | Audience outdegree/total outdegree | -27        | 0.0041904  | 0.0039562 | -0.0049134 | 0.0132942  |
| Middle | Audience outdegree/total outdegree | -26        | -0.1564897 | 0.3349648 | -0.9272850 | 0.6143056  |
| Middle | Audience outdegree/total outdegree | -25        | 0.1578039  | 0.2865441 | -0.5015692 | 0.8171770  |
| Middle | Audience outdegree/total outdegree | -24        | -0.0040833 | 0.0050993 | -0.0158173 | 0.0076508  |
| Middle | Audience outdegree/total outdegree | -23        | 0.0015864  | 0.0044656 | -0.0086894 | 0.0118623  |
| Middle | Audience outdegree/total outdegree | -22        | 0.0003413  | 0.0033789 | -0.0074339 | 0.0081166  |
| Middle | Audience outdegree/total outdegree | -21        | -0.0043900 | 0.0029804 | -0.0112482 | 0.0024683  |
| Middle | Audience outdegree/total outdegree | -20        | -0.0031114 | 0.0044206 | -0.0132838 | 0.0070610  |
| Middle | Audience outdegree/total outdegree | -19        | 0.0056737  | 0.0012958 | 0.0026920  | 0.0086555  |
| Middle | Audience outdegree/total outdegree | -18        | -0.0097974 | 0.0026272 | -0.0158430 | -0.0037518 |
| Middle | Audience outdegree/total outdegree | -17        | 0.0056496  | 0.0022921 | 0.0003752  | 0.0109240  |
| Middle | Audience outdegree/total outdegree | -16        | -0.0013108 | 0.0036348 | -0.0096749 | 0.0070533  |
| Middle | Audience outdegree/total outdegree | -15        | 0.0006892  | 0.0023398 | -0.0046949 | 0.0060734  |

|        |                                    |     |            |           |            |            |
|--------|------------------------------------|-----|------------|-----------|------------|------------|
| Middle | Audience outdegree/total outdegree | -14 | -0.0028431 | 0.0020813 | -0.0076324 | 0.0019462  |
| Middle | Audience outdegree/total outdegree | -13 | 0.1794761  | 0.3185650 | -0.5535811 | 0.9125334  |
| Middle | Audience outdegree/total outdegree | -12 | -0.1809414 | 0.3143247 | -0.9042412 | 0.5423584  |
| Middle | Audience outdegree/total outdegree | -11 | 0.0046466  | 0.0055214 | -0.0080588 | 0.0173520  |
| Middle | Audience outdegree/total outdegree | -10 | -0.0030139 | 0.0058383 | -0.0164485 | 0.0104208  |
| Middle | Audience outdegree/total outdegree | -9  | -0.0187737 | 0.0473024 | -0.1276222 | 0.0900749  |
| Middle | Audience outdegree/total outdegree | -8  | 0.0197282  | 0.0501354 | -0.0956395 | 0.1350960  |
| Middle | Audience outdegree/total outdegree | -7  | -0.0021412 | 0.0043604 | -0.0121749 | 0.0078926  |
| Middle | Audience outdegree/total outdegree | -6  | 0.0005603  | 0.0040190 | -0.0086879 | 0.0098085  |
| Middle | Audience outdegree/total outdegree | -5  | 0.0018925  | 0.0033237 | -0.0057558 | 0.0095408  |
| Middle | Audience outdegree/total outdegree | -4  | -0.0018261 | 0.0023963 | -0.0073402 | 0.0036880  |
| Middle | Audience outdegree/total outdegree | -3  | -0.0015774 | 0.0032968 | -0.0091639 | 0.0060090  |
| Middle | Audience outdegree/total outdegree | -2  | 0.0011178  | 0.0030838 | -0.0059784 | 0.0082140  |
| Middle | Audience outdegree/total outdegree | -1  | 0.0005721  | 0.0037688 | -0.0081004 | 0.0092446  |
| Middle | Audience outdegree/total outdegree | 0   | 0.1671378  | 0.3216414 | -0.5729987 | 0.9072743  |
| Middle | Audience outdegree/total outdegree | 1   | -0.0035689 | 0.0052789 | -0.0157162 | 0.0085784  |
| Middle | Audience outdegree/total outdegree | 2   | -0.0073551 | 0.0049151 | -0.0186654 | 0.0039553  |
| Middle | Audience outdegree/total outdegree | 3   | -0.0046296 | 0.0033686 | -0.0123812 | 0.0031220  |
| Middle | Audience outdegree/total outdegree | 4   | -0.0027014 | 0.0038445 | -0.0115480 | 0.0061452  |
| Middle | Audience outdegree/total outdegree | 5   | -0.0010616 | 0.0015157 | -0.0045494 | 0.0024263  |
| Middle | Audience outdegree/total outdegree | 6   | -0.0043416 | 0.0054055 | -0.0167803 | 0.0080971  |
| Middle | Audience outdegree/total outdegree | 7   | 0.0009603  | 0.0024032 | -0.0045697 | 0.0064902  |
| Middle | Audience outdegree/total outdegree | 8   | -0.0032443 | 0.0058492 | -0.0167040 | 0.0102155  |
| Middle | Audience outdegree/total outdegree | 9   | -0.0065112 | 0.0039168 | -0.0155242 | 0.0025019  |
| Middle | Audience outdegree/total outdegree | 10  | -0.0056844 | 0.0037341 | -0.0142771 | 0.0029083  |
| Middle | Audience outdegree/total outdegree | 11  | -0.0027144 | 0.0021630 | -0.0076917 | 0.0022629  |
| Middle | Audience outdegree/total outdegree | 12  | -0.0034814 | 0.0050991 | -0.0152152 | 0.0082524  |
| Middle | Audience outdegree/total outdegree | 13  | -0.0069134 | 0.0026049 | -0.0129075 | -0.0009193 |
| Middle | Audience outdegree/total outdegree | 14  | 0.0009918  | 0.0022605 | -0.0042098 | 0.0061935  |
| Middle | Audience outdegree/total outdegree | 15  | -0.0051555 | 0.0024807 | -0.0108640 | 0.0005530  |
| Middle | Audience outdegree/total outdegree | 16  | 0.0013989  | 0.0076361 | -0.0161726 | 0.0189705  |
| Middle | Audience outdegree/total outdegree | 17  | -0.0031359 | 0.0068815 | -0.0189711 | 0.0126994  |
| Middle | Audience outdegree/total outdegree | 18  | 0.0022189  | 0.0101042 | -0.0210320 | 0.0254699  |
| Middle | Audience outdegree/total outdegree | 19  | -0.0015078 | 0.0120266 | -0.0291825 | 0.0261670  |
| Middle | Audience outdegree/total outdegree | 20  | 0.0043541  | 0.0188856 | -0.0391039 | 0.0478122  |
| Middle | Audience outdegree/total outdegree | 21  | -0.0016871 | 0.0061191 | -0.0157679 | 0.0123937  |
| Middle | Audience outdegree/total outdegree | 22  | 0.0104797  | 0.0101375 | -0.0128479 | 0.0338073  |
| Middle | Audience outdegree/total outdegree | 23  | -0.0015074 | 0.0121141 | -0.0293834 | 0.0263686  |
| Middle | Audience outdegree/total outdegree | 24  | 0.0039007  | 0.0039132 | -0.0051040 | 0.0129054  |
| Middle | Audience outdegree/total outdegree | 25  | -0.0023433 | 0.0079907 | -0.0207309 | 0.0160443  |
| Middle | Audience outdegree/total outdegree | 26  | -0.0042593 | 0.0072962 | -0.0210489 | 0.0125302  |



|        |                                    |    |            |           |            |           |
|--------|------------------------------------|----|------------|-----------|------------|-----------|
| Middle | Audience outdegree/total outdegree | 27 | -0.0043628 | 0.0020212 | -0.0090139 | 0.0002883 |
| Middle | Audience outdegree/total outdegree | 28 | -0.0007359 | 0.0064706 | -0.0156255 | 0.0141537 |
| Middle | Audience outdegree/total outdegree | 29 | -0.0000922 | 0.0012957 | -0.0030738 | 0.0028894 |
| Middle | Audience outdegree/total outdegree | 30 | -0.0034950 | 0.0034013 | -0.0113219 | 0.0043318 |

| sample | outcome                            | event.time | estimate   | std.error | conf.low   | conf.high  |
|--------|------------------------------------|------------|------------|-----------|------------|------------|
| Least  | Audience outdegree/total outdegree | -30        | 0.0020530  | 0.0036576 | -0.0059567 | 0.0100628  |
| Least  | Audience outdegree/total outdegree | -29        | -0.0062791 | 0.0034086 | -0.0137436 | 0.0011853  |
| Least  | Audience outdegree/total outdegree | -28        | -0.0010444 | 0.0029620 | -0.0075310 | 0.0054421  |
| Least  | Audience outdegree/total outdegree | -27        | 0.0055595  | 0.0029514 | -0.0009037 | 0.0120227  |
| Least  | Audience outdegree/total outdegree | -26        | -0.1354286 | 0.2962188 | -0.7841163 | 0.5132591  |
| Least  | Audience outdegree/total outdegree | -25        | 0.1333689  | 0.2964592 | -0.5158452 | 0.7825830  |
| Least  | Audience outdegree/total outdegree | -24        | 0.0013965  | 0.0029548 | -0.0050742 | 0.0078673  |
| Least  | Audience outdegree/total outdegree | -23        | -0.0057846 | 0.0032804 | -0.0129684 | 0.0013992  |
| Least  | Audience outdegree/total outdegree | -22        | 0.0070512  | 0.0018577 | 0.0029830  | 0.0111194  |
| Least  | Audience outdegree/total outdegree | -21        | -0.0061342 | 0.0036820 | -0.0141974 | 0.0019290  |
| Least  | Audience outdegree/total outdegree | -20        | 0.0009765  | 0.0028116 | -0.0051805 | 0.0071336  |
| Least  | Audience outdegree/total outdegree | -19        | -0.0039795 | 0.0022029 | -0.0088036 | 0.0008447  |
| Least  | Audience outdegree/total outdegree | -18        | -0.0000327 | 0.0024374 | -0.0053703 | 0.0053050  |
| Least  | Audience outdegree/total outdegree | -17        | 0.0012780  | 0.0040271 | -0.0075408 | 0.0100969  |
| Least  | Audience outdegree/total outdegree | -16        | -0.0032403 | 0.0055013 | -0.0152876 | 0.0088070  |
| Least  | Audience outdegree/total outdegree | -15        | 0.0030054  | 0.0018619 | -0.0010720 | 0.0070829  |
| Least  | Audience outdegree/total outdegree | -14        | -0.0041390 | 0.0020174 | -0.0085569 | 0.0002790  |
| Least  | Audience outdegree/total outdegree | -13        | 0.1582270  | 0.3420605 | -0.5908492 | 0.9073031  |
| Least  | Audience outdegree/total outdegree | -12        | -0.1608368 | 0.3406940 | -0.9069205 | 0.5852469  |
| Least  | Audience outdegree/total outdegree | -11        | 0.0033573  | 0.0017841 | -0.0005498 | 0.0072643  |
| Least  | Audience outdegree/total outdegree | -10        | -0.0029749 | 0.0013497 | -0.0059307 | -0.0000192 |
| Least  | Audience outdegree/total outdegree | -9         | -0.0176358 | 0.0375542 | -0.0998755 | 0.0646039  |
| Least  | Audience outdegree/total outdegree | -8         | 0.0186897  | 0.0407576 | -0.0705652 | 0.1079446  |
| Least  | Audience outdegree/total outdegree | -7         | -0.0046530 | 0.0043476 | -0.0141737 | 0.0048677  |
| Least  | Audience outdegree/total outdegree | -6         | -0.0005833 | 0.0047486 | -0.0109823 | 0.0098156  |
| Least  | Audience outdegree/total outdegree | -5         | 0.0013205  | 0.0021485 | -0.0033845 | 0.0060256  |
| Least  | Audience outdegree/total outdegree | -4         | 0.0003080  | 0.0026068 | -0.0054006 | 0.0060166  |
| Least  | Audience outdegree/total outdegree | -3         | -0.0001443 | 0.0026280 | -0.0058994 | 0.0056108  |
| Least  | Audience outdegree/total outdegree | -2         | -0.0001229 | 0.0020640 | -0.0046428 | 0.0043969  |
| Least  | Audience outdegree/total outdegree | -1         | -0.0004221 | 0.0031773 | -0.0073801 | 0.0065358  |
| Least  | Audience outdegree/total outdegree | 0          | 0.1544610  | 0.3424434 | -0.5954536 | 0.9043756  |
| Least  | Audience outdegree/total outdegree | 1          | -0.0031217 | 0.0040803 | -0.0120571 | 0.0058138  |
| Least  | Audience outdegree/total outdegree | 2          | -0.0029967 | 0.0023001 | -0.0080336 | 0.0020403  |
| Least  | Audience outdegree/total outdegree | 3          | -0.0027552 | 0.0024812 | -0.0081887 | 0.0026783  |
| Least  | Audience outdegree/total outdegree | 4          | -0.0033471 | 0.0053021 | -0.0149583 | 0.0082640  |

|       |                                    |    |            |           |            |            |
|-------|------------------------------------|----|------------|-----------|------------|------------|
| Least | Audience outdegree/total outdegree | 5  | 0.0005829  | 0.0032789 | -0.0065976 | 0.0077634  |
| Least | Audience outdegree/total outdegree | 6  | -0.0018008 | 0.0044482 | -0.0115419 | 0.0079402  |
| Least | Audience outdegree/total outdegree | 7  | -0.0041012 | 0.0041940 | -0.0132856 | 0.0050832  |
| Least | Audience outdegree/total outdegree | 8  | -0.0036826 | 0.0024015 | -0.0089417 | 0.0015765  |
| Least | Audience outdegree/total outdegree | 9  | -0.0055611 | 0.0019587 | -0.0098505 | -0.0012717 |
| Least | Audience outdegree/total outdegree | 10 | -0.0038559 | 0.0047284 | -0.0142105 | 0.0064987  |
| Least | Audience outdegree/total outdegree | 11 | -0.0025573 | 0.0026190 | -0.0082928 | 0.0031781  |
| Least | Audience outdegree/total outdegree | 12 | -0.0038223 | 0.0043583 | -0.0133666 | 0.0057220  |
| Least | Audience outdegree/total outdegree | 13 | -0.0066512 | 0.0040749 | -0.0155749 | 0.0022724  |
| Least | Audience outdegree/total outdegree | 14 | -0.0097216 | 0.0037708 | -0.0179793 | -0.0014640 |
| Least | Audience outdegree/total outdegree | 15 | -0.0096953 | 0.0107987 | -0.0333432 | 0.0139527  |
| Least | Audience outdegree/total outdegree | 16 | -0.0074973 | 0.0036070 | -0.0153962 | 0.0004016  |
| Least | Audience outdegree/total outdegree | 17 | -0.0143603 | 0.0008312 | -0.0161806 | -0.0125400 |
| Least | Audience outdegree/total outdegree | 18 | -0.0089830 | 0.0058314 | -0.0217531 | 0.0037870  |
| Least | Audience outdegree/total outdegree | 19 | -0.0125256 | 0.0064292 | -0.0266050 | 0.0015537  |
| Least | Audience outdegree/total outdegree | 20 | -0.0117907 | 0.0011467 | -0.0143018 | -0.0092796 |
| Least | Audience outdegree/total outdegree | 21 | -0.0099462 | 0.0016334 | -0.0135232 | -0.0063692 |
| Least | Audience outdegree/total outdegree | 22 | -0.0093064 | 0.0012356 | -0.0120122 | -0.0066005 |
| Least | Audience outdegree/total outdegree | 23 | -0.0095507 | 0.0041138 | -0.0185595 | -0.0005419 |
| Least | Audience outdegree/total outdegree | 24 | -0.0166779 | 0.0062675 | -0.0304031 | -0.0029526 |
| Least | Audience outdegree/total outdegree | 25 | -0.0138849 | 0.0038800 | -0.0223816 | -0.0053882 |
| Least | Audience outdegree/total outdegree | 26 | -0.0152564 | 0.0131824 | -0.0441245 | 0.0136117  |
| Least | Audience outdegree/total outdegree | 27 | -0.0142173 | 0.0006947 | -0.0157385 | -0.0126960 |
| Least | Audience outdegree/total outdegree | 28 | -0.0177698 | 0.0133297 | -0.0469605 | 0.0114210  |
| Least | Audience outdegree/total outdegree | 29 | -0.0140350 | 0.0124155 | -0.0412236 | 0.0131536  |
| Least | Audience outdegree/total outdegree | 30 | -0.0158651 | 0.0073618 | -0.0319867 | 0.0002566  |

## Audience indegree/total indegree

Average effect by length of exposure (Callaway and Sant'Anna)

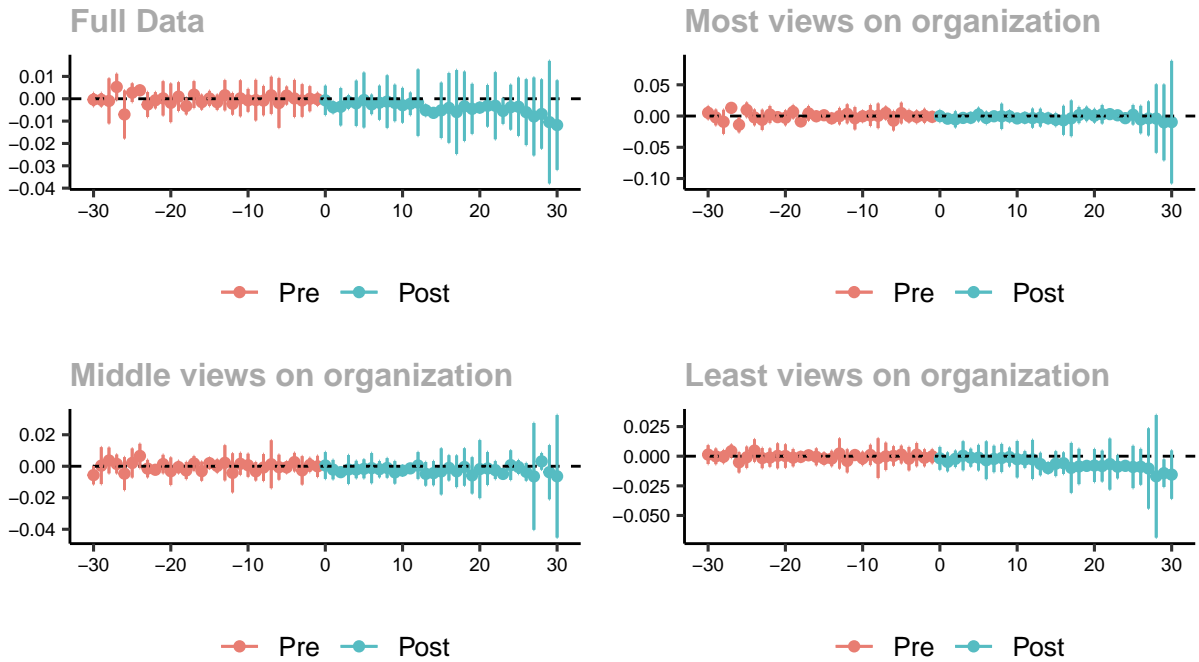

Long timeframe with sampled control groups

| sample | outcome                          | event.time | estimate   | std.error | conf.low   | conf.high |
|--------|----------------------------------|------------|------------|-----------|------------|-----------|
| Full   | Audience indegree/total indegree | -30        | -0.0003681 | 0.0008239 | -0.0033028 | 0.0025666 |
| Full   | Audience indegree/total indegree | -29        | -0.0004527 | 0.0008520 | -0.0034876 | 0.0025822 |
| Full   | Audience indegree/total indegree | -28        | -0.0009543 | 0.0028259 | -0.0110198 | 0.0091113 |
| Full   | Audience indegree/total indegree | -27        | 0.0052873  | 0.0016505 | -0.0005917 | 0.0111662 |
| Full   | Audience indegree/total indegree | -26        | -0.0070249 | 0.0030036 | -0.0177233 | 0.0036734 |
| Full   | Audience indegree/total indegree | -25        | 0.0027115  | 0.0011706 | -0.0014579 | 0.0068808 |
| Full   | Audience indegree/total indegree | -24        | 0.0037873  | 0.0006042 | 0.0016353  | 0.0059393 |
| Full   | Audience indegree/total indegree | -23        | -0.0025761 | 0.0015564 | -0.0081197 | 0.0029676 |
| Full   | Audience indegree/total indegree | -22        | -0.0006702 | 0.0010137 | -0.0042811 | 0.0029406 |
| Full   | Audience indegree/total indegree | -21        | 0.0001796  | 0.0021464 | -0.0074654 | 0.0078247 |
| Full   | Audience indegree/total indegree | -20        | -0.0018172 | 0.0024208 | -0.0104397 | 0.0068053 |
| Full   | Audience indegree/total indegree | -19        | 0.0009468  | 0.0018036 | -0.0054774 | 0.0073709 |
| Full   | Audience indegree/total indegree | -18        | -0.0032641 | 0.0010474 | -0.0069949 | 0.0004667 |
| Full   | Audience indegree/total indegree | -17        | 0.0018602  | 0.0016815 | -0.0041291 | 0.0078496 |
| Full   | Audience indegree/total indegree | -16        | -0.0014964 | 0.0009387 | -0.0048400 | 0.0018472 |
| Full   | Audience indegree/total indegree | -15        | 0.0001338  | 0.0009525 | -0.0032588 | 0.0035264 |
| Full   | Audience indegree/total indegree | -14        | -0.0015451 | 0.0009558 | -0.0049495 | 0.0018593 |
| Full   | Audience indegree/total indegree | -13        | 0.0015767  | 0.0018924 | -0.0051638 | 0.0083173 |
| Full   | Audience indegree/total indegree | -12        | -0.0022500 | 0.0013521 | -0.0070661 | 0.0025662 |

|      |                                  |     |            |           |            |            |
|------|----------------------------------|-----|------------|-----------|------------|------------|
| Full | Audience indegree/total indegree | -11 | 0.0001911  | 0.0022523 | -0.0078313 | 0.0082136  |
| Full | Audience indegree/total indegree | -10 | -0.0007034 | 0.0014314 | -0.0058019 | 0.0043952  |
| Full | Audience indegree/total indegree | -9  | -0.0006151 | 0.0025430 | -0.0096731 | 0.0084429  |
| Full | Audience indegree/total indegree | -8  | -0.0008189 | 0.0018404 | -0.0073741 | 0.0057364  |
| Full | Audience indegree/total indegree | -7  | 0.0015419  | 0.0023271 | -0.0067468 | 0.0098306  |
| Full | Audience indegree/total indegree | -6  | -0.0018988 | 0.0031160 | -0.0129976 | 0.0092001  |
| Full | Audience indegree/total indegree | -5  | 0.0014344  | 0.0011268 | -0.0025792 | 0.0054479  |
| Full | Audience indegree/total indegree | -4  | 0.0001431  | 0.0023217 | -0.0081265 | 0.0084126  |
| Full | Audience indegree/total indegree | -3  | -0.0007791 | 0.0020412 | -0.0080496 | 0.0064914  |
| Full | Audience indegree/total indegree | -2  | 0.0000128  | 0.0015710 | -0.0055828 | 0.0056084  |
| Full | Audience indegree/total indegree | -1  | -0.0002067 | 0.0008109 | -0.0030951 | 0.0026817  |
| Full | Audience indegree/total indegree | 0   | -0.0007000 | 0.0018332 | -0.0072295 | 0.0058296  |
| Full | Audience indegree/total indegree | 1   | -0.0037806 | 0.0007491 | -0.0064487 | -0.0011126 |
| Full | Audience indegree/total indegree | 2   | -0.0035760 | 0.0023370 | -0.0119001 | 0.0047481  |
| Full | Audience indegree/total indegree | 3   | -0.0014606 | 0.0008625 | -0.0045326 | 0.0016114  |
| Full | Audience indegree/total indegree | 4   | -0.0020206 | 0.0028391 | -0.0121331 | 0.0080918  |
| Full | Audience indegree/total indegree | 5   | -0.0005612 | 0.0034448 | -0.0128311 | 0.0117087  |
| Full | Audience indegree/total indegree | 6   | -0.0025138 | 0.0012230 | -0.0068698 | 0.0018423  |
| Full | Audience indegree/total indegree | 7   | -0.0017598 | 0.0021329 | -0.0093570 | 0.0058373  |
| Full | Audience indegree/total indegree | 8   | -0.0012517 | 0.0032917 | -0.0129763 | 0.0104729  |
| Full | Audience indegree/total indegree | 9   | -0.0018655 | 0.0022875 | -0.0100131 | 0.0062821  |
| Full | Audience indegree/total indegree | 10  | -0.0029041 | 0.0021751 | -0.0106514 | 0.0048433  |
| Full | Audience indegree/total indegree | 11  | -0.0022639 | 0.0014151 | -0.0073042 | 0.0027764  |
| Full | Audience indegree/total indegree | 12  | -0.0017343 | 0.0041655 | -0.0165714 | 0.0131028  |
| Full | Audience indegree/total indegree | 13  | -0.0051688 | 0.0007156 | -0.0077178 | -0.0026199 |
| Full | Audience indegree/total indegree | 14  | -0.0063035 | 0.0003004 | -0.0073735 | -0.0052335 |
| Full | Audience indegree/total indegree | 15  | -0.0051774 | 0.0034736 | -0.0175499 | 0.0071950  |
| Full | Audience indegree/total indegree | 16  | -0.0040882 | 0.0043761 | -0.0196755 | 0.0114990  |
| Full | Audience indegree/total indegree | 17  | -0.0059415 | 0.0052672 | -0.0247024 | 0.0128195  |
| Full | Audience indegree/total indegree | 18  | -0.0033649 | 0.0043496 | -0.0188576 | 0.0121278  |
| Full | Audience indegree/total indegree | 19  | -0.0045048 | 0.0031350 | -0.0156711 | 0.0066616  |
| Full | Audience indegree/total indegree | 20  | -0.0039539 | 0.0006273 | -0.0061881 | -0.0017197 |
| Full | Audience indegree/total indegree | 21  | -0.0031319 | 0.0026089 | -0.0124246 | 0.0061608  |
| Full | Audience indegree/total indegree | 22  | -0.0031347 | 0.0042028 | -0.0181044 | 0.0118351  |
| Full | Audience indegree/total indegree | 23  | -0.0054739 | 0.0016109 | -0.0112119 | 0.0002641  |
| Full | Audience indegree/total indegree | 24  | -0.0037512 | 0.0028106 | -0.0137622 | 0.0062598  |
| Full | Audience indegree/total indegree | 25  | -0.0035726 | 0.0036502 | -0.0165743 | 0.0094290  |
| Full | Audience indegree/total indegree | 26  | -0.0059935 | 0.0041283 | -0.0206981 | 0.0087111  |
| Full | Audience indegree/total indegree | 27  | -0.0079268 | 0.0048892 | -0.0253416 | 0.0094879  |
| Full | Audience indegree/total indegree | 28  | -0.0068146 | 0.0043392 | -0.0222703 | 0.0086410  |
| Full | Audience indegree/total indegree | 29  | -0.0104396 | 0.0076902 | -0.0378311 | 0.0169518  |

|      |                                  |    |            |           |            |           |
|------|----------------------------------|----|------------|-----------|------------|-----------|
| Full | Audience indegree/total indegree | 30 | -0.0117755 | 0.0056167 | -0.0317815 | 0.0082304 |
|------|----------------------------------|----|------------|-----------|------------|-----------|

| sample | outcome                          | event.time | estimate   | std.error | conf.low   | conf.high  |
|--------|----------------------------------|------------|------------|-----------|------------|------------|
| Most   | Audience indegree/total indegree | -30        | 0.0051805  | 0.0042408 | -0.0052925 | 0.0156536  |
| Most   | Audience indegree/total indegree | -29        | -0.0022379 | 0.0050881 | -0.0148032 | 0.0103274  |
| Most   | Audience indegree/total indegree | -28        | -0.0092254 | 0.0077565 | -0.0283804 | 0.0099297  |
| Most   | Audience indegree/total indegree | -27        | 0.0130748  | 0.0010481 | 0.0104864  | 0.0156632  |
| Most   | Audience indegree/total indegree | -26        | -0.0140279 | 0.0048561 | -0.0260204 | -0.0020354 |
| Most   | Audience indegree/total indegree | -25        | 0.0098070  | 0.0047545 | -0.0019345 | 0.0215485  |
| Most   | Audience indegree/total indegree | -24        | -0.0021812 | 0.0051036 | -0.0147848 | 0.0104224  |
| Most   | Audience indegree/total indegree | -23        | -0.0060283 | 0.0065405 | -0.0221806 | 0.0101239  |
| Most   | Audience indegree/total indegree | -22        | 0.0023790  | 0.0055071 | -0.0112211 | 0.0159792  |
| Most   | Audience indegree/total indegree | -21        | -0.0017367 | 0.0025159 | -0.0079499 | 0.0044764  |
| Most   | Audience indegree/total indegree | -20        | -0.0028448 | 0.0048176 | -0.0147421 | 0.0090525  |
| Most   | Audience indegree/total indegree | -19        | 0.0066849  | 0.0043506 | -0.0040593 | 0.0174291  |
| Most   | Audience indegree/total indegree | -18        | -0.0085893 | 0.0028726 | -0.0156833 | -0.0014952 |
| Most   | Audience indegree/total indegree | -17        | 0.0043470  | 0.0047231 | -0.0073170 | 0.0160110  |
| Most   | Audience indegree/total indegree | -16        | -0.0003747 | 0.0029448 | -0.0076469 | 0.0068976  |
| Most   | Audience indegree/total indegree | -15        | 0.0012555  | 0.0025645 | -0.0050778 | 0.0075888  |
| Most   | Audience indegree/total indegree | -14        | -0.0036994 | 0.0032366 | -0.0116925 | 0.0042937  |
| Most   | Audience indegree/total indegree | -13        | -0.0001482 | 0.0052920 | -0.0132170 | 0.0129206  |
| Most   | Audience indegree/total indegree | -12        | 0.0035067  | 0.0061359 | -0.0116464 | 0.0186597  |
| Most   | Audience indegree/total indegree | -11        | -0.0035469 | 0.0072203 | -0.0213777 | 0.0142840  |
| Most   | Audience indegree/total indegree | -10        | -0.0004401 | 0.0036843 | -0.0095386 | 0.0086584  |
| Most   | Audience indegree/total indegree | -9         | 0.0008882  | 0.0067782 | -0.0158510 | 0.0176273  |
| Most   | Audience indegree/total indegree | -8         | 0.0003479  | 0.0079524 | -0.0192911 | 0.0199868  |
| Most   | Audience indegree/total indegree | -7         | 0.0048008  | 0.0042647 | -0.0057313 | 0.0153328  |
| Most   | Audience indegree/total indegree | -6         | -0.0074352 | 0.0062927 | -0.0229754 | 0.0081049  |
| Most   | Audience indegree/total indegree | -5         | 0.0047705  | 0.0067075 | -0.0117941 | 0.0213351  |
| Most   | Audience indegree/total indegree | -4         | -0.0002223 | 0.0040640 | -0.0102586 | 0.0098139  |
| Most   | Audience indegree/total indegree | -3         | -0.0012906 | 0.0040922 | -0.0113964 | 0.0088152  |
| Most   | Audience indegree/total indegree | -2         | 0.0003816  | 0.0045362 | -0.0108207 | 0.0115840  |
| Most   | Audience indegree/total indegree | -1         | -0.0012586 | 0.0032417 | -0.0092641 | 0.0067469  |
| Most   | Audience indegree/total indegree | 0          | -0.0000640 | 0.0037920 | -0.0094285 | 0.0093006  |
| Most   | Audience indegree/total indegree | 1          | -0.0042253 | 0.0017738 | -0.0086058 | 0.0001552  |
| Most   | Audience indegree/total indegree | 2          | -0.0052734 | 0.0051690 | -0.0180385 | 0.0074918  |
| Most   | Audience indegree/total indegree | 3          | -0.0029969 | 0.0020155 | -0.0079744 | 0.0019806  |
| Most   | Audience indegree/total indegree | 4          | -0.0028077 | 0.0032772 | -0.0109010 | 0.0052856  |
| Most   | Audience indegree/total indegree | 5          | 0.0023501  | 0.0044172 | -0.0085584 | 0.0132586  |
| Most   | Audience indegree/total indegree | 6          | -0.0029118 | 0.0039963 | -0.0127808 | 0.0069572  |
| Most   | Audience indegree/total indegree | 7          | -0.0003672 | 0.0022627 | -0.0059551 | 0.0052208  |

|      |                                  |    |            |           |            |           |
|------|----------------------------------|----|------------|-----------|------------|-----------|
| Most | Audience indegree/total indegree | 8  | -0.0004515 | 0.0081547 | -0.0205900 | 0.0196870 |
| Most | Audience indegree/total indegree | 9  | -0.0004572 | 0.0037491 | -0.0097158 | 0.0088014 |
| Most | Audience indegree/total indegree | 10 | -0.0038198 | 0.0022786 | -0.0094470 | 0.0018073 |
| Most | Audience indegree/total indegree | 11 | -0.0028434 | 0.0034256 | -0.0113032 | 0.0056164 |
| Most | Audience indegree/total indegree | 12 | -0.0033462 | 0.0061353 | -0.0184977 | 0.0118053 |
| Most | Audience indegree/total indegree | 13 | -0.0025776 | 0.0057376 | -0.0167469 | 0.0115917 |
| Most | Audience indegree/total indegree | 14 | -0.0036552 | 0.0034818 | -0.0122538 | 0.0049434 |
| Most | Audience indegree/total indegree | 15 | -0.0057245 | 0.0042156 | -0.0161351 | 0.0046862 |
| Most | Audience indegree/total indegree | 16 | -0.0068326 | 0.0093602 | -0.0299483 | 0.0162830 |
| Most | Audience indegree/total indegree | 17 | -0.0036753 | 0.0115302 | -0.0321498 | 0.0247991 |
| Most | Audience indegree/total indegree | 18 | 0.0015310  | 0.0052021 | -0.0113159 | 0.0143779 |
| Most | Audience indegree/total indegree | 19 | 0.0033818  | 0.0046615 | -0.0081302 | 0.0148937 |
| Most | Audience indegree/total indegree | 20 | 0.0005325  | 0.0044111 | -0.0103610 | 0.0114260 |
| Most | Audience indegree/total indegree | 21 | 0.0028008  | 0.0059336 | -0.0118527 | 0.0174543 |
| Most | Audience indegree/total indegree | 22 | 0.0030292  | 0.0013520 | -0.0003096 | 0.0063680 |
| Most | Audience indegree/total indegree | 23 | 0.0011998  | 0.0015345 | -0.0025896 | 0.0049893 |
| Most | Audience indegree/total indegree | 24 | -0.0033792 | 0.0022970 | -0.0090518 | 0.0022935 |
| Most | Audience indegree/total indegree | 25 | 0.0020075  | 0.0063152 | -0.0135882 | 0.0176033 |
| Most | Audience indegree/total indegree | 26 | -0.0055947 | 0.0088740 | -0.0275095 | 0.0163201 |
| Most | Audience indegree/total indegree | 27 | -0.0038365 | 0.0109725 | -0.0309339 | 0.0232608 |
| Most | Audience indegree/total indegree | 28 | -0.0040305 | 0.0221053 | -0.0586210 | 0.0505600 |
| Most | Audience indegree/total indegree | 29 | -0.0102020 | 0.0245388 | -0.0708021 | 0.0503981 |
| Most | Audience indegree/total indegree | 30 | -0.0096955 | 0.0396672 | -0.1076562 | 0.0882652 |

| sample | outcome                          | event.time | estimate   | std.error | conf.low   | conf.high |
|--------|----------------------------------|------------|------------|-----------|------------|-----------|
| Middle | Audience indegree/total indegree | -30        | -0.0056055 | 0.0024771 | -0.0114395 | 0.0002286 |
| Middle | Audience indegree/total indegree | -29        | 0.0003843  | 0.0049525 | -0.0112798 | 0.0120484 |
| Middle | Audience indegree/total indegree | -28        | 0.0036686  | 0.0034657 | -0.0044938 | 0.0118310 |
| Middle | Audience indegree/total indegree | -27        | 0.0014467  | 0.0025267 | -0.0045042 | 0.0073977 |
| Middle | Audience indegree/total indegree | -26        | -0.0046767 | 0.0044232 | -0.0150941 | 0.0057407 |
| Middle | Audience indegree/total indegree | -25        | 0.0020749  | 0.0038947 | -0.0070977 | 0.0112476 |
| Middle | Audience indegree/total indegree | -24        | 0.0065657  | 0.0032630 | -0.0011193 | 0.0142508 |
| Middle | Audience indegree/total indegree | -23        | -0.0014865 | 0.0023435 | -0.0070060 | 0.0040330 |
| Middle | Audience indegree/total indegree | -22        | -0.0022287 | 0.0009840 | -0.0045463 | 0.0000889 |
| Middle | Audience indegree/total indegree | -21        | 0.0013890  | 0.0024867 | -0.0044677 | 0.0072457 |
| Middle | Audience indegree/total indegree | -20        | -0.0031457 | 0.0036898 | -0.0118359 | 0.0055444 |
| Middle | Audience indegree/total indegree | -19        | -0.0005300 | 0.0016766 | -0.0044786 | 0.0034187 |
| Middle | Audience indegree/total indegree | -18        | -0.0026825 | 0.0023012 | -0.0081023 | 0.0027373 |
| Middle | Audience indegree/total indegree | -17        | 0.0017619  | 0.0019674 | -0.0028717 | 0.0063955 |
| Middle | Audience indegree/total indegree | -16        | -0.0031071 | 0.0025672 | -0.0091533 | 0.0029390 |
| Middle | Audience indegree/total indegree | -15        | 0.0019388  | 0.0014684 | -0.0015196 | 0.0053971 |

|        |                                  |     |            |           |            |            |
|--------|----------------------------------|-----|------------|-----------|------------|------------|
| Middle | Audience indegree/total indegree | -14 | 0.0001660  | 0.0017997 | -0.0040727 | 0.0044047  |
| Middle | Audience indegree/total indegree | -13 | 0.0021884  | 0.0047195 | -0.0089271 | 0.0133038  |
| Middle | Audience indegree/total indegree | -12 | -0.0041983 | 0.0052468 | -0.0165556 | 0.0081590  |
| Middle | Audience indegree/total indegree | -11 | 0.0015333  | 0.0029357 | -0.0053808 | 0.0084475  |
| Middle | Audience indegree/total indegree | -10 | 0.0006349  | 0.0031004 | -0.0066671 | 0.0079369  |
| Middle | Audience indegree/total indegree | -9  | -0.0031857 | 0.0024717 | -0.0090070 | 0.0026355  |
| Middle | Audience indegree/total indegree | -8  | -0.0007881 | 0.0036098 | -0.0092900 | 0.0077138  |
| Middle | Audience indegree/total indegree | -7  | 0.0012702  | 0.0064379 | -0.0138922 | 0.0164326  |
| Middle | Audience indegree/total indegree | -6  | -0.0005962 | 0.0033615 | -0.0085132 | 0.0073208  |
| Middle | Audience indegree/total indegree | -5  | -0.0006738 | 0.0016014 | -0.0044455 | 0.0030978  |
| Middle | Audience indegree/total indegree | -4  | 0.0026332  | 0.0024856 | -0.0032209 | 0.0084873  |
| Middle | Audience indegree/total indegree | -3  | -0.0026087 | 0.0038080 | -0.0115772 | 0.0063598  |
| Middle | Audience indegree/total indegree | -2  | 0.0008425  | 0.0019043 | -0.0036427 | 0.0053276  |
| Middle | Audience indegree/total indegree | -1  | -0.0000608 | 0.0028327 | -0.0067323 | 0.0066107  |
| Middle | Audience indegree/total indegree | 0   | 0.0004867  | 0.0035996 | -0.0079910 | 0.0089644  |
| Middle | Audience indegree/total indegree | 1   | -0.0021184 | 0.0026141 | -0.0082751 | 0.0040382  |
| Middle | Audience indegree/total indegree | 2   | -0.0037448 | 0.0010668 | -0.0062574 | -0.0012322 |
| Middle | Audience indegree/total indegree | 3   | -0.0020440 | 0.0038726 | -0.0111648 | 0.0070768  |
| Middle | Audience indegree/total indegree | 4   | -0.0020800 | 0.0023434 | -0.0075993 | 0.0034392  |
| Middle | Audience indegree/total indegree | 5   | -0.0016358 | 0.0025437 | -0.0076267 | 0.0043551  |
| Middle | Audience indegree/total indegree | 6   | -0.0011890 | 0.0040491 | -0.0107255 | 0.0083474  |
| Middle | Audience indegree/total indegree | 7   | -0.0018513 | 0.0021902 | -0.0070096 | 0.0033071  |
| Middle | Audience indegree/total indegree | 8   | -0.0010660 | 0.0026311 | -0.0072627 | 0.0051307  |
| Middle | Audience indegree/total indegree | 9   | -0.0038722 | 0.0030190 | -0.0109826 | 0.0032381  |
| Middle | Audience indegree/total indegree | 10  | -0.0027591 | 0.0013358 | -0.0059052 | 0.0003870  |
| Middle | Audience indegree/total indegree | 11  | -0.0013366 | 0.0009298 | -0.0035266 | 0.0008533  |
| Middle | Audience indegree/total indegree | 12  | 0.0004862  | 0.0035959 | -0.0079827 | 0.0089552  |
| Middle | Audience indegree/total indegree | 13  | -0.0048003 | 0.0031661 | -0.0122570 | 0.0026564  |
| Middle | Audience indegree/total indegree | 14  | -0.0043719 | 0.0032441 | -0.0120124 | 0.0032687  |
| Middle | Audience indegree/total indegree | 15  | -0.0032662 | 0.0061928 | -0.0178516 | 0.0113191  |
| Middle | Audience indegree/total indegree | 16  | -0.0010117 | 0.0033888 | -0.0089930 | 0.0069697  |
| Middle | Audience indegree/total indegree | 17  | -0.0031904 | 0.0042510 | -0.0132024 | 0.0068216  |
| Middle | Audience indegree/total indegree | 18  | -0.0004564 | 0.0050098 | -0.0122554 | 0.0113426  |
| Middle | Audience indegree/total indegree | 19  | -0.0057876 | 0.0048800 | -0.0172809 | 0.0057057  |
| Middle | Audience indegree/total indegree | 20  | -0.0018210 | 0.0078043 | -0.0202017 | 0.0165596  |
| Middle | Audience indegree/total indegree | 21  | -0.0014057 | 0.0044204 | -0.0118166 | 0.0090052  |
| Middle | Audience indegree/total indegree | 22  | -0.0024404 | 0.0024039 | -0.0081020 | 0.0032213  |
| Middle | Audience indegree/total indegree | 23  | -0.0048561 | 0.0001526 | -0.0052154 | -0.0044967 |
| Middle | Audience indegree/total indegree | 24  | 0.0007041  | 0.0039829 | -0.0086763 | 0.0100846  |
| Middle | Audience indegree/total indegree | 25  | -0.0004728 | 0.0018515 | -0.0048334 | 0.0038878  |
| Middle | Audience indegree/total indegree | 26  | -0.0035456 | 0.0023721 | -0.0091324 | 0.0020412  |

|        |                                  |    |            |           |            |           |
|--------|----------------------------------|----|------------|-----------|------------|-----------|
| Middle | Audience indegree/total indegree | 27 | -0.0064319 | 0.0143750 | -0.0402878 | 0.0274239 |
| Middle | Audience indegree/total indegree | 28 | 0.0031008  | 0.0022198 | -0.0021272 | 0.0083288 |
| Middle | Audience indegree/total indegree | 29 | -0.0037803 | 0.0072771 | -0.0209192 | 0.0133586 |
| Middle | Audience indegree/total indegree | 30 | -0.0063684 | 0.0164986 | -0.0452258 | 0.0324889 |

| sample | outcome                          | event.time | estimate   | std.error | conf.low   | conf.high |
|--------|----------------------------------|------------|------------|-----------|------------|-----------|
| Least  | Audience indegree/total indegree | -30        | 0.0013530  | 0.0028099 | -0.0065401 | 0.0092462 |
| Least  | Audience indegree/total indegree | -29        | -0.0001224 | 0.0023424 | -0.0067024 | 0.0064577 |
| Least  | Audience indegree/total indegree | -28        | -0.0004218 | 0.0019351 | -0.0058578 | 0.0050141 |
| Least  | Audience indegree/total indegree | -27        | 0.0042171  | 0.0020034 | -0.0014107 | 0.0098449 |
| Least  | Audience indegree/total indegree | -26        | -0.0051541 | 0.0030454 | -0.0137088 | 0.0034006 |
| Least  | Audience indegree/total indegree | -25        | -0.0008948 | 0.0031963 | -0.0098735 | 0.0080840 |
| Least  | Audience indegree/total indegree | -24        | 0.0047563  | 0.0033686 | -0.0047064 | 0.0142189 |
| Least  | Audience indegree/total indegree | -23        | -0.0015924 | 0.0030294 | -0.0101022 | 0.0069174 |
| Least  | Audience indegree/total indegree | -22        | -0.0011458 | 0.0027474 | -0.0088636 | 0.0065720 |
| Least  | Audience indegree/total indegree | -21        | 0.0003083  | 0.0037309 | -0.0101721 | 0.0107888 |
| Least  | Audience indegree/total indegree | -20        | 0.0001455  | 0.0034876 | -0.0096515 | 0.0099425 |
| Least  | Audience indegree/total indegree | -19        | -0.0012477 | 0.0025926 | -0.0085305 | 0.0060350 |
| Least  | Audience indegree/total indegree | -18        | -0.0005384 | 0.0015163 | -0.0047977 | 0.0037209 |
| Least  | Audience indegree/total indegree | -17        | 0.0007564  | 0.0013193 | -0.0029497 | 0.0044624 |
| Least  | Audience indegree/total indegree | -16        | -0.0005519 | 0.0025272 | -0.0076512 | 0.0065473 |
| Least  | Audience indegree/total indegree | -15        | -0.0020814 | 0.0018709 | -0.0073370 | 0.0031742 |
| Least  | Audience indegree/total indegree | -14        | -0.0019544 | 0.0023159 | -0.0084600 | 0.0045512 |
| Least  | Audience indegree/total indegree | -13        | 0.0022849  | 0.0045028 | -0.0103637 | 0.0149336 |
| Least  | Audience indegree/total indegree | -12        | -0.0039381 | 0.0034604 | -0.0136587 | 0.0057824 |
| Least  | Audience indegree/total indegree | -11        | 0.0009825  | 0.0014029 | -0.0029584 | 0.0049235 |
| Least  | Audience indegree/total indegree | -10        | -0.0018211 | 0.0020130 | -0.0074759 | 0.0038336 |
| Least  | Audience indegree/total indegree | -9         | 0.0010492  | 0.0030375 | -0.0074833 | 0.0095818 |
| Least  | Audience indegree/total indegree | -8         | -0.0016280 | 0.0059416 | -0.0183185 | 0.0150626 |
| Least  | Audience indegree/total indegree | -7         | -0.0001175 | 0.0040958 | -0.0116230 | 0.0113880 |
| Least  | Audience indegree/total indegree | -6         | 0.0002219  | 0.0029053 | -0.0079394 | 0.0083832 |
| Least  | Audience indegree/total indegree | -5         | 0.0013895  | 0.0026583 | -0.0060779 | 0.0088570 |
| Least  | Audience indegree/total indegree | -4         | -0.0021054 | 0.0034926 | -0.0119165 | 0.0077056 |
| Least  | Audience indegree/total indegree | -3         | 0.0013265  | 0.0034813 | -0.0084527 | 0.0111057 |
| Least  | Audience indegree/total indegree | -2         | -0.0013180 | 0.0025484 | -0.0084767 | 0.0058408 |
| Least  | Audience indegree/total indegree | -1         | -0.0000430 | 0.0021073 | -0.0059625 | 0.0058765 |
| Least  | Audience indegree/total indegree | 0          | -0.0018081 | 0.0034169 | -0.0114064 | 0.0077901 |
| Least  | Audience indegree/total indegree | 1          | -0.0048018 | 0.0028202 | -0.0127241 | 0.0031204 |
| Least  | Audience indegree/total indegree | 2          | -0.0022247 | 0.0024576 | -0.0091284 | 0.0046790 |
| Least  | Audience indegree/total indegree | 3          | 0.0003733  | 0.0043392 | -0.0118158 | 0.0125624 |
| Least  | Audience indegree/total indegree | 4          | -0.0012694 | 0.0026845 | -0.0088105 | 0.0062716 |



|       |                                  |    |            |           |            |            |
|-------|----------------------------------|----|------------|-----------|------------|------------|
| Least | Audience indegree/total indegree | 5  | -0.0012201 | 0.0038269 | -0.0119701 | 0.0095299  |
| Least | Audience indegree/total indegree | 6  | -0.0034437 | 0.0056617 | -0.0193479 | 0.0124605  |
| Least | Audience indegree/total indegree | 7  | -0.0023227 | 0.0039499 | -0.0134182 | 0.0087728  |
| Least | Audience indegree/total indegree | 8  | -0.0014983 | 0.0042130 | -0.0133330 | 0.0103363  |
| Least | Audience indegree/total indegree | 9  | -0.0007174 | 0.0028097 | -0.0086100 | 0.0071752  |
| Least | Audience indegree/total indegree | 10 | -0.0025462 | 0.0054617 | -0.0178886 | 0.0127962  |
| Least | Audience indegree/total indegree | 11 | -0.0027713 | 0.0024956 | -0.0097818 | 0.0042392  |
| Least | Audience indegree/total indegree | 12 | -0.0027342 | 0.0058623 | -0.0192017 | 0.0137333  |
| Least | Audience indegree/total indegree | 13 | -0.0065955 | 0.0033704 | -0.0160633 | 0.0028723  |
| Least | Audience indegree/total indegree | 14 | -0.0099603 | 0.0016742 | -0.0146631 | -0.0052574 |
| Least | Audience indegree/total indegree | 15 | -0.0063101 | 0.0037126 | -0.0167390 | 0.0041188  |
| Least | Audience indegree/total indegree | 16 | -0.0059011 | 0.0032139 | -0.0149293 | 0.0031271  |
| Least | Audience indegree/total indegree | 17 | -0.0098305 | 0.0074775 | -0.0308352 | 0.0111742  |
| Least | Audience indegree/total indegree | 18 | -0.0086665 | 0.0052953 | -0.0235414 | 0.0062084  |
| Least | Audience indegree/total indegree | 19 | -0.0081566 | 0.0009378 | -0.0107911 | -0.0055222 |
| Least | Audience indegree/total indegree | 20 | -0.0078851 | 0.0049284 | -0.0217293 | 0.0059591  |
| Least | Audience indegree/total indegree | 21 | -0.0083383 | 0.0046221 | -0.0213220 | 0.0046455  |
| Least | Audience indegree/total indegree | 22 | -0.0066439 | 0.0076456 | -0.0281209 | 0.0148331  |
| Least | Audience indegree/total indegree | 23 | -0.0088541 | 0.0034865 | -0.0186479 | 0.0009397  |
| Least | Audience indegree/total indegree | 24 | -0.0081338 | 0.0000792 | -0.0083564 | -0.0079112 |
| Least | Audience indegree/total indegree | 25 | -0.0090907 | 0.0063393 | -0.0268982 | 0.0087168  |
| Least | Audience indegree/total indegree | 26 | -0.0089321 | 0.0053606 | -0.0239904 | 0.0061262  |
| Least | Audience indegree/total indegree | 27 | -0.0103431 | 0.0120152 | -0.0440947 | 0.0234085  |
| Least | Audience indegree/total indegree | 28 | -0.0169456 | 0.0183825 | -0.0685833 | 0.0346922  |
| Least | Audience indegree/total indegree | 29 | -0.0143203 | 0.0041293 | -0.0259199 | -0.0027208 |
| Least | Audience indegree/total indegree | 30 | -0.0155379 | 0.0072252 | -0.0358339 | 0.0047582  |

## Hateful non-audience outdegree

Average effect by length of exposure (Callaway and Sant'Anna)

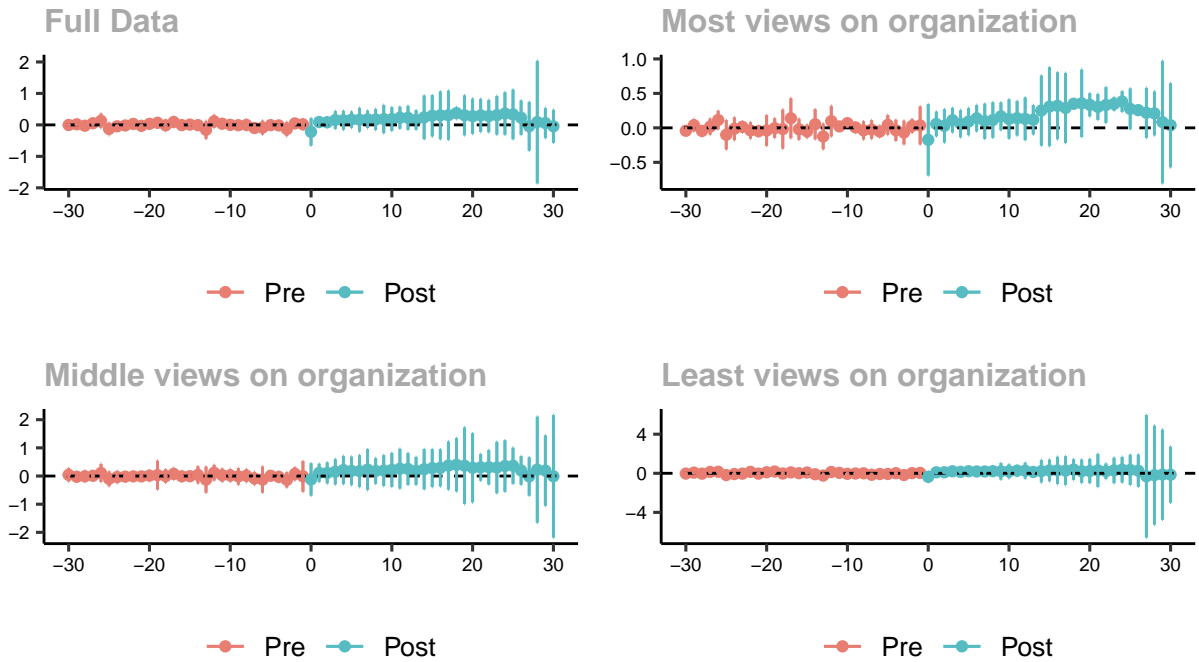

Long timeframe with sampled control groups

| sample | outcome                        | event.time | estimate   | std.error | conf.low   | conf.high |
|--------|--------------------------------|------------|------------|-----------|------------|-----------|
| Full   | Hateful non-audience outdegree | -30        | -0.0025356 | 0.0120853 | -0.0343268 | 0.0292556 |
| Full   | Hateful non-audience outdegree | -29        | 0.0190249  | 0.0238157 | -0.0436240 | 0.0816738 |
| Full   | Hateful non-audience outdegree | -28        | -0.0268623 | 0.0215014 | -0.0834233 | 0.0296987 |
| Full   | Hateful non-audience outdegree | -27        | 0.0525694  | 0.0404958 | -0.0539578 | 0.1590965 |
| Full   | Hateful non-audience outdegree | -26        | 0.1284851  | 0.0873461 | -0.1012849 | 0.3582550 |
| Full   | Hateful non-audience outdegree | -25        | -0.1269580 | 0.0748965 | -0.3239784 | 0.0700624 |
| Full   | Hateful non-audience outdegree | -24        | -0.0452638 | 0.0195569 | -0.0967096 | 0.0061821 |
| Full   | Hateful non-audience outdegree | -23        | -0.0182406 | 0.0252478 | -0.0846566 | 0.0481755 |
| Full   | Hateful non-audience outdegree | -22        | 0.0311429  | 0.0270422 | -0.0399936 | 0.1022794 |
| Full   | Hateful non-audience outdegree | -21        | -0.0300948 | 0.0159695 | -0.0721038 | 0.0119142 |
| Full   | Hateful non-audience outdegree | -20        | 0.0326665  | 0.0353569 | -0.0603424 | 0.1256754 |
| Full   | Hateful non-audience outdegree | -19        | 0.0662252  | 0.0565974 | -0.0826583 | 0.2151087 |
| Full   | Hateful non-audience outdegree | -18        | -0.0148746 | 0.0673007 | -0.1919137 | 0.1621644 |
| Full   | Hateful non-audience outdegree | -17        | 0.0923892  | 0.0592251 | -0.0634066 | 0.2481850 |
| Full   | Hateful non-audience outdegree | -16        | -0.0067433 | 0.0511027 | -0.1411725 | 0.1276860 |
| Full   | Hateful non-audience outdegree | -15        | 0.0102366  | 0.0375540 | -0.0885520 | 0.1090251 |
| Full   | Hateful non-audience outdegree | -14        | -0.0087841 | 0.0439073 | -0.1242854 | 0.1067172 |
| Full   | Hateful non-audience outdegree | -13        | -0.1565588 | 0.1081887 | -0.4411567 | 0.1280392 |
| Full   | Hateful non-audience outdegree | -12        | 0.1112348  | 0.0789328 | -0.0964033 | 0.3188730 |

|      |                                |     |            |           |            |           |
|------|--------------------------------|-----|------------|-----------|------------|-----------|
| Full | Hateful non-audience outdegree | -11 | 0.0358328  | 0.0363232 | -0.0597179 | 0.1313835 |
| Full | Hateful non-audience outdegree | -10 | 0.0026193  | 0.0224605 | -0.0564646 | 0.0617031 |
| Full | Hateful non-audience outdegree | -9  | -0.0102480 | 0.0503041 | -0.1425765 | 0.1220805 |
| Full | Hateful non-audience outdegree | -8  | -0.0010834 | 0.0636062 | -0.1684040 | 0.1662372 |
| Full | Hateful non-audience outdegree | -7  | -0.0982595 | 0.0498876 | -0.2294924 | 0.0329734 |
| Full | Hateful non-audience outdegree | -6  | -0.0860158 | 0.0833049 | -0.3051552 | 0.1331235 |
| Full | Hateful non-audience outdegree | -5  | -0.0080983 | 0.0087402 | -0.0310900 | 0.0148934 |
| Full | Hateful non-audience outdegree | -4  | -0.0174380 | 0.0260386 | -0.0859343 | 0.0510583 |
| Full | Hateful non-audience outdegree | -3  | -0.1319034 | 0.0861524 | -0.3585333 | 0.0947265 |
| Full | Hateful non-audience outdegree | -2  | 0.0462283  | 0.0274336 | -0.0259378 | 0.1183944 |
| Full | Hateful non-audience outdegree | -1  | 0.0174345  | 0.0627323 | -0.1475874 | 0.1824563 |
| Full | Hateful non-audience outdegree | 0   | -0.2203527 | 0.1650969 | -0.6546515 | 0.2139462 |
| Full | Hateful non-audience outdegree | 1   | 0.0911410  | 0.0568600 | -0.0584332 | 0.2407152 |
| Full | Hateful non-audience outdegree | 2   | 0.0838396  | 0.0604782 | -0.0752525 | 0.2429318 |
| Full | Hateful non-audience outdegree | 3   | 0.1551098  | 0.1078954 | -0.1287165 | 0.4389362 |
| Full | Hateful non-audience outdegree | 4   | 0.1482532  | 0.1142766 | -0.1523595 | 0.4488658 |
| Full | Hateful non-audience outdegree | 5   | 0.1667997  | 0.0975876 | -0.0899114 | 0.4235107 |
| Full | Hateful non-audience outdegree | 6   | 0.1632808  | 0.1431651 | -0.2133250 | 0.5398865 |
| Full | Hateful non-audience outdegree | 7   | 0.1772270  | 0.1048934 | -0.0987025 | 0.4531565 |
| Full | Hateful non-audience outdegree | 8   | 0.1718084  | 0.1271363 | -0.1626325 | 0.5062493 |
| Full | Hateful non-audience outdegree | 9   | 0.1842139  | 0.1702295 | -0.2635868 | 0.6320146 |
| Full | Hateful non-audience outdegree | 10  | 0.1855712  | 0.1427917 | -0.1900524 | 0.5611949 |
| Full | Hateful non-audience outdegree | 11  | 0.2291162  | 0.1322666 | -0.1188202 | 0.5770527 |
| Full | Hateful non-audience outdegree | 12  | 0.2248257  | 0.1443825 | -0.1549827 | 0.6046341 |
| Full | Hateful non-audience outdegree | 13  | 0.1573149  | 0.1172767 | -0.1511897 | 0.4658194 |
| Full | Hateful non-audience outdegree | 14  | 0.2389051  | 0.2630126 | -0.4529679 | 0.9307781 |
| Full | Hateful non-audience outdegree | 15  | 0.2915456  | 0.2495471 | -0.3649055 | 0.9479966 |
| Full | Hateful non-audience outdegree | 16  | 0.3042630  | 0.2875383 | -0.4521266 | 1.0606526 |
| Full | Hateful non-audience outdegree | 17  | 0.3079229  | 0.2958294 | -0.4702770 | 1.0861228 |
| Full | Hateful non-audience outdegree | 18  | 0.3743777  | 0.0712893 | 0.1868462  | 0.5619093 |
| Full | Hateful non-audience outdegree | 19  | 0.3038739  | 0.2401002 | -0.3277265 | 0.9354742 |
| Full | Hateful non-audience outdegree | 20  | 0.2757745  | 0.2122839 | -0.2826531 | 0.8342021 |
| Full | Hateful non-audience outdegree | 21  | 0.3012553  | 0.1997762 | -0.2242700 | 0.8267805 |
| Full | Hateful non-audience outdegree | 22  | 0.2792576  | 0.1948376 | -0.2332764 | 0.7917916 |
| Full | Hateful non-audience outdegree | 23  | 0.3062249  | 0.2333111 | -0.3075164 | 0.9199662 |
| Full | Hateful non-audience outdegree | 24  | 0.3622234  | 0.2560980 | -0.3114602 | 1.0359071 |
| Full | Hateful non-audience outdegree | 25  | 0.3325520  | 0.2991789 | -0.4544591 | 1.1195631 |
| Full | Hateful non-audience outdegree | 26  | 0.2286851  | 0.2071679 | -0.3162844 | 0.7736546 |
| Full | Hateful non-audience outdegree | 27  | -0.0431845 | 0.2942588 | -0.8172529 | 0.7308839 |
| Full | Hateful non-audience outdegree | 28  | 0.0890384  | 0.7395510 | -1.8564022 | 2.0344791 |
| Full | Hateful non-audience outdegree | 29  | 0.0567525  | 0.1810343 | -0.4194708 | 0.5329758 |

|      |                                |    |            |           |            |           |
|------|--------------------------------|----|------------|-----------|------------|-----------|
| Full | Hateful non-audience outdegree | 30 | -0.0442143 | 0.1985981 | -0.5666404 | 0.4782119 |
|------|--------------------------------|----|------------|-----------|------------|-----------|

| sample | outcome                        | event.time | estimate   | std.error | conf.low   | conf.high |
|--------|--------------------------------|------------|------------|-----------|------------|-----------|
| Most   | Hateful non-audience outdegree | -30        | -0.0417056 | 0.0226159 | -0.0971326 | 0.0137215 |
| Most   | Hateful non-audience outdegree | -29        | 0.0390451  | 0.0362624 | -0.0498269 | 0.1279172 |
| Most   | Hateful non-audience outdegree | -28        | -0.0454855 | 0.0292796 | -0.1172441 | 0.0262732 |
| Most   | Hateful non-audience outdegree | -27        | 0.0178757  | 0.0478395 | -0.0993695 | 0.1351209 |
| Most   | Hateful non-audience outdegree | -26        | 0.1140230  | 0.0546078 | -0.0198100 | 0.2478560 |
| Most   | Hateful non-audience outdegree | -25        | -0.1004727 | 0.0864321 | -0.3123009 | 0.1113555 |
| Most   | Hateful non-audience outdegree | -24        | -0.0137461 | 0.0673469 | -0.1788001 | 0.1513078 |
| Most   | Hateful non-audience outdegree | -23        | 0.0148270  | 0.0328962 | -0.0657950 | 0.0954491 |
| Most   | Hateful non-audience outdegree | -22        | -0.0370442 | 0.0485670 | -0.1560725 | 0.0819841 |
| Most   | Hateful non-audience outdegree | -21        | -0.0483328 | 0.0313644 | -0.1252008 | 0.0285353 |
| Most   | Hateful non-audience outdegree | -20        | -0.0380557 | 0.0906738 | -0.2602794 | 0.1841681 |
| Most   | Hateful non-audience outdegree | -19        | -0.0039476 | 0.0581740 | -0.1465208 | 0.1386256 |
| Most   | Hateful non-audience outdegree | -18        | -0.0175046 | 0.1152358 | -0.2999250 | 0.2649159 |
| Most   | Hateful non-audience outdegree | -17        | 0.1391225  | 0.1180951 | -0.1503053 | 0.4285504 |
| Most   | Hateful non-audience outdegree | -16        | -0.0200427 | 0.0621285 | -0.1723076 | 0.1322221 |
| Most   | Hateful non-audience outdegree | -15        | -0.0508766 | 0.0397237 | -0.1482317 | 0.0464785 |
| Most   | Hateful non-audience outdegree | -14        | 0.0518450  | 0.0887379 | -0.1656341 | 0.2693241 |
| Most   | Hateful non-audience outdegree | -13        | -0.1248612 | 0.0757433 | -0.3104931 | 0.0607708 |
| Most   | Hateful non-audience outdegree | -12        | 0.0975040  | 0.0902125 | -0.1235891 | 0.3185972 |
| Most   | Hateful non-audience outdegree | -11        | 0.0211726  | 0.0185853 | -0.0243763 | 0.0667216 |
| Most   | Hateful non-audience outdegree | -10        | 0.0675271  | 0.0268938 | 0.0016157  | 0.1334385 |
| Most   | Hateful non-audience outdegree | -9         | 0.0060888  | 0.0298799 | -0.0671410 | 0.0793186 |
| Most   | Hateful non-audience outdegree | -8         | -0.0363232 | 0.0534230 | -0.1672524 | 0.0946060 |
| Most   | Hateful non-audience outdegree | -7         | -0.0253252 | 0.0554265 | -0.1611646 | 0.1105143 |
| Most   | Hateful non-audience outdegree | -6         | -0.0536415 | 0.0343437 | -0.1378113 | 0.0305282 |
| Most   | Hateful non-audience outdegree | -5         | 0.0436556  | 0.0581368 | -0.0988264 | 0.1861376 |
| Most   | Hateful non-audience outdegree | -4         | -0.0356462 | 0.0621897 | -0.1880609 | 0.1167684 |
| Most   | Hateful non-audience outdegree | -3         | -0.0674955 | 0.0700606 | -0.2392003 | 0.1042092 |
| Most   | Hateful non-audience outdegree | -2         | 0.0275194  | 0.0414148 | -0.0739801 | 0.1290190 |
| Most   | Hateful non-audience outdegree | -1         | 0.0343666  | 0.1121400 | -0.2404664 | 0.3091997 |
| Most   | Hateful non-audience outdegree | 0          | -0.1730112 | 0.2107698 | -0.6895666 | 0.3435443 |
| Most   | Hateful non-audience outdegree | 1          | 0.0558302  | 0.0729659 | -0.1229949 | 0.2346554 |
| Most   | Hateful non-audience outdegree | 2          | 0.0288747  | 0.0983892 | -0.2122580 | 0.2700074 |
| Most   | Hateful non-audience outdegree | 3          | 0.1117462  | 0.0725742 | -0.0661188 | 0.2896112 |
| Most   | Hateful non-audience outdegree | 4          | 0.0603104  | 0.0800788 | -0.1359469 | 0.2565678 |
| Most   | Hateful non-audience outdegree | 5          | 0.0911004  | 0.0803657 | -0.1058601 | 0.2880608 |
| Most   | Hateful non-audience outdegree | 6          | 0.1394383  | 0.0779844 | -0.0516861 | 0.3305627 |
| Most   | Hateful non-audience outdegree | 7          | 0.0956093  | 0.1040979 | -0.1595141 | 0.3507327 |

|      |                                |    |           |           |            |           |
|------|--------------------------------|----|-----------|-----------|------------|-----------|
| Most | Hateful non-audience outdegree | 8  | 0.1139665 | 0.1047782 | -0.1428244 | 0.3707573 |
| Most | Hateful non-audience outdegree | 9  | 0.1670719 | 0.0820640 | -0.0340509 | 0.3681946 |
| Most | Hateful non-audience outdegree | 10 | 0.1284211 | 0.1157146 | -0.1551727 | 0.4120150 |
| Most | Hateful non-audience outdegree | 11 | 0.1399120 | 0.1021564 | -0.1104534 | 0.3902773 |
| Most | Hateful non-audience outdegree | 12 | 0.1304338 | 0.1259368 | -0.1782126 | 0.4390802 |
| Most | Hateful non-audience outdegree | 13 | 0.1178357 | 0.0863412 | -0.0937696 | 0.3294409 |
| Most | Hateful non-audience outdegree | 14 | 0.2508313 | 0.2069886 | -0.2564571 | 0.7581198 |
| Most | Hateful non-audience outdegree | 15 | 0.3068650 | 0.2335176 | -0.2654407 | 0.8791706 |
| Most | Hateful non-audience outdegree | 16 | 0.3196923 | 0.1976982 | -0.1648272 | 0.8042117 |
| Most | Hateful non-audience outdegree | 17 | 0.2888276 | 0.2069813 | -0.2184429 | 0.7960980 |
| Most | Hateful non-audience outdegree | 18 | 0.3491799 | 0.0155794 | 0.3109978  | 0.3873620 |
| Most | Hateful non-audience outdegree | 19 | 0.3562098 | 0.1994440 | -0.1325883 | 0.8450078 |
| Most | Hateful non-audience outdegree | 20 | 0.3342715 | 0.0683921 | 0.1666560  | 0.5018870 |
| Most | Hateful non-audience outdegree | 21 | 0.3046624 | 0.0764241 | 0.1173620  | 0.4919628 |
| Most | Hateful non-audience outdegree | 22 | 0.3316101 | 0.1053630 | 0.0733860  | 0.5898342 |
| Most | Hateful non-audience outdegree | 23 | 0.3477416 | 0.0399316 | 0.2498770  | 0.4456062 |
| Most | Hateful non-audience outdegree | 24 | 0.3821144 | 0.0613804 | 0.2316831  | 0.5325457 |
| Most | Hateful non-audience outdegree | 25 | 0.2755539 | 0.1201915 | -0.0190118 | 0.5701197 |
| Most | Hateful non-audience outdegree | 26 | 0.2572860 | 0.0115684 | 0.2289341  | 0.2856379 |
| Most | Hateful non-audience outdegree | 27 | 0.2188156 | 0.1472771 | -0.1421315 | 0.5797628 |
| Most | Hateful non-audience outdegree | 28 | 0.2100965 | 0.1295246 | -0.1073428 | 0.5275359 |
| Most | Hateful non-audience outdegree | 29 | 0.0836129 | 0.3623332 | -0.8043945 | 0.9716204 |
| Most | Hateful non-audience outdegree | 30 | 0.0376856 | 0.2486227 | -0.5716399 | 0.6470110 |

| sample | outcome                        | event.time | estimate   | std.error | conf.low   | conf.high |
|--------|--------------------------------|------------|------------|-----------|------------|-----------|
| Middle | Hateful non-audience outdegree | -30        | 0.0422213  | 0.0503937 | -0.1909327 | 0.2753752 |
| Middle | Hateful non-audience outdegree | -29        | -0.0263940 | 0.0360846 | -0.1933444 | 0.1405565 |
| Middle | Hateful non-audience outdegree | -28        | -0.0102339 | 0.0428061 | -0.2082828 | 0.1878149 |
| Middle | Hateful non-audience outdegree | -27        | 0.0088414  | 0.0330597 | -0.1441141 | 0.1617970 |
| Middle | Hateful non-audience outdegree | -26        | 0.1085593  | 0.0690653 | -0.2109815 | 0.4281000 |
| Middle | Hateful non-audience outdegree | -25        | -0.0983825 | 0.0565593 | -0.3600622 | 0.1632972 |
| Middle | Hateful non-audience outdegree | -24        | -0.0348044 | 0.0470214 | -0.2523559 | 0.1827470 |
| Middle | Hateful non-audience outdegree | -23        | -0.0221608 | 0.0358817 | -0.1881727 | 0.1438511 |
| Middle | Hateful non-audience outdegree | -22        | -0.0116999 | 0.0186473 | -0.0979741 | 0.0745743 |
| Middle | Hateful non-audience outdegree | -21        | -0.0129155 | 0.0237967 | -0.1230145 | 0.0971835 |
| Middle | Hateful non-audience outdegree | -20        | 0.0145222  | 0.0408603 | -0.1745239 | 0.2035684 |
| Middle | Hateful non-audience outdegree | -19        | 0.0326805  | 0.1100467 | -0.4764666 | 0.5418275 |
| Middle | Hateful non-audience outdegree | -18        | -0.0004542 | 0.0519439 | -0.2407804 | 0.2398720 |
| Middle | Hateful non-audience outdegree | -17        | 0.0758968  | 0.0458421 | -0.1361981 | 0.2879918 |
| Middle | Hateful non-audience outdegree | -16        | -0.0113753 | 0.0370555 | -0.1828179 | 0.1600674 |
| Middle | Hateful non-audience outdegree | -15        | -0.0060907 | 0.0206543 | -0.1016509 | 0.0894695 |

|        |                                |     |            |           |            |           |
|--------|--------------------------------|-----|------------|-----------|------------|-----------|
| Middle | Hateful non-audience outdegree | -14 | 0.0412146  | 0.0656545 | -0.2625454 | 0.3449747 |
| Middle | Hateful non-audience outdegree | -13 | -0.1284184 | 0.0997189 | -0.5897826 | 0.3329457 |
| Middle | Hateful non-audience outdegree | -12 | 0.1174549  | 0.0599300 | -0.1598199 | 0.3947296 |
| Middle | Hateful non-audience outdegree | -11 | 0.0295259  | 0.0504054 | -0.2036821 | 0.2627339 |
| Middle | Hateful non-audience outdegree | -10 | 0.0222968  | 0.0485485 | -0.2023198 | 0.2469133 |
| Middle | Hateful non-audience outdegree | -9  | -0.0119346 | 0.0632960 | -0.3047827 | 0.2809135 |
| Middle | Hateful non-audience outdegree | -8  | 0.0128292  | 0.0497944 | -0.2175519 | 0.2432102 |
| Middle | Hateful non-audience outdegree | -7  | -0.0862693 | 0.0504712 | -0.3197819 | 0.1472433 |
| Middle | Hateful non-audience outdegree | -6  | -0.1260136 | 0.0996707 | -0.5871548 | 0.3351277 |
| Middle | Hateful non-audience outdegree | -5  | 0.0094614  | 0.0249137 | -0.1058055 | 0.1247284 |
| Middle | Hateful non-audience outdegree | -4  | -0.0300016 | 0.0391907 | -0.2113231 | 0.1513199 |
| Middle | Hateful non-audience outdegree | -3  | -0.1373346 | 0.0582604 | -0.4068847 | 0.1322155 |
| Middle | Hateful non-audience outdegree | -2  | 0.0772634  | 0.0503665 | -0.1557644 | 0.3102912 |
| Middle | Hateful non-audience outdegree | -1  | -0.0108975 | 0.1177251 | -0.5555698 | 0.5337748 |
| Middle | Hateful non-audience outdegree | 0   | -0.1196964 | 0.1235820 | -0.6914667 | 0.4520740 |
| Middle | Hateful non-audience outdegree | 1   | 0.1119298  | 0.0698996 | -0.2114709 | 0.4353305 |
| Middle | Hateful non-audience outdegree | 2   | 0.1094559  | 0.0801314 | -0.2612836 | 0.4801954 |
| Middle | Hateful non-audience outdegree | 3   | 0.1522364  | 0.0969141 | -0.2961509 | 0.6006237 |
| Middle | Hateful non-audience outdegree | 4   | 0.2132850  | 0.1080908 | -0.2868129 | 0.7133830 |
| Middle | Hateful non-audience outdegree | 5   | 0.1814611  | 0.1090536 | -0.3230913 | 0.6860134 |
| Middle | Hateful non-audience outdegree | 6   | 0.1741327  | 0.1220036 | -0.3903347 | 0.7386002 |
| Middle | Hateful non-audience outdegree | 7   | 0.2272177  | 0.1561025 | -0.4950135 | 0.9494489 |
| Middle | Hateful non-audience outdegree | 8   | 0.1780060  | 0.0980735 | -0.2757455 | 0.6317575 |
| Middle | Hateful non-audience outdegree | 9   | 0.1955872  | 0.1184442 | -0.3524124 | 0.7435867 |
| Middle | Hateful non-audience outdegree | 10  | 0.2177966  | 0.1300703 | -0.3839926 | 0.8195858 |
| Middle | Hateful non-audience outdegree | 11  | 0.2612117  | 0.1521053 | -0.4425258 | 0.9649492 |
| Middle | Hateful non-audience outdegree | 12  | 0.2519019  | 0.1223590 | -0.3142099 | 0.8180138 |
| Middle | Hateful non-audience outdegree | 13  | 0.1831976  | 0.1067852 | -0.3108598 | 0.6772550 |
| Middle | Hateful non-audience outdegree | 14  | 0.2418506  | 0.1539266 | -0.4703133 | 0.9540145 |
| Middle | Hateful non-audience outdegree | 15  | 0.2803982  | 0.1452519 | -0.3916310 | 0.9524274 |
| Middle | Hateful non-audience outdegree | 16  | 0.2905372  | 0.1417585 | -0.3653290 | 0.9464035 |
| Middle | Hateful non-audience outdegree | 17  | 0.3712877  | 0.1838552 | -0.4793452 | 1.2219205 |
| Middle | Hateful non-audience outdegree | 18  | 0.3979701  | 0.2037982 | -0.5449321 | 1.3408723 |
| Middle | Hateful non-audience outdegree | 19  | 0.3643625  | 0.2933336 | -0.9927884 | 1.7215133 |
| Middle | Hateful non-audience outdegree | 20  | 0.2919579  | 0.2648688 | -0.9334964 | 1.5174121 |
| Middle | Hateful non-audience outdegree | 21  | 0.3075964  | 0.1017996 | -0.1633943 | 0.7785871 |
| Middle | Hateful non-audience outdegree | 22  | 0.3105927  | 0.1316630 | -0.2985656 | 0.9197510 |
| Middle | Hateful non-audience outdegree | 23  | 0.3016029  | 0.1968841 | -0.6093102 | 1.2125161 |
| Middle | Hateful non-audience outdegree | 24  | 0.3560087  | 0.1968309 | -0.5546581 | 1.2666755 |
| Middle | Hateful non-audience outdegree | 25  | 0.3646706  | 0.1381874 | -0.2746736 | 1.0040149 |
| Middle | Hateful non-audience outdegree | 26  | 0.1970749  | 0.1094313 | -0.3092251 | 0.7033750 |

|        |                                |    |            |           |            |           |
|--------|--------------------------------|----|------------|-----------|------------|-----------|
| Middle | Hateful non-audience outdegree | 27 | -0.0134873 | 0.1467376 | -0.6923903 | 0.6654156 |
| Middle | Hateful non-audience outdegree | 28 | 0.2254217  | 0.4060629 | -1.6532876 | 2.1041311 |
| Middle | Hateful non-audience outdegree | 29 | 0.1922682  | 0.2695187 | -1.0546994 | 1.4392358 |
| Middle | Hateful non-audience outdegree | 30 | -0.0093644 | 0.4696895 | -2.1824516 | 2.1637227 |

| sample | outcome                        | event.time | estimate   | std.error | conf.low   | conf.high  |
|--------|--------------------------------|------------|------------|-----------|------------|------------|
| Least  | Hateful non-audience outdegree | -30        | -0.0330358 | 0.0615168 | -0.1691641 | 0.1030925  |
| Least  | Hateful non-audience outdegree | -29        | 0.0657930  | 0.0685085 | -0.0858069 | 0.2173929  |
| Least  | Hateful non-audience outdegree | -28        | -0.0381813 | 0.0655847 | -0.1833113 | 0.1069488  |
| Least  | Hateful non-audience outdegree | -27        | 0.1384376  | 0.0947474 | -0.0712254 | 0.3481005  |
| Least  | Hateful non-audience outdegree | -26        | 0.1551954  | 0.1716120 | -0.2245584 | 0.5349492  |
| Least  | Hateful non-audience outdegree | -25        | -0.1779876 | 0.1383877 | -0.4842205 | 0.1282454  |
| Least  | Hateful non-audience outdegree | -24        | -0.0779211 | 0.1644797 | -0.4418922 | 0.2860499  |
| Least  | Hateful non-audience outdegree | -23        | -0.0372558 | 0.0420556 | -0.1303192 | 0.0558075  |
| Least  | Hateful non-audience outdegree | -22        | 0.1432941  | 0.1175270 | -0.1167770 | 0.4033652  |
| Least  | Hateful non-audience outdegree | -21        | -0.0345412 | 0.0653966 | -0.1792550 | 0.1101725  |
| Least  | Hateful non-audience outdegree | -20        | 0.1053419  | 0.0492820 | -0.0037124 | 0.2143962  |
| Least  | Hateful non-audience outdegree | -19        | 0.1785133  | 0.0988268 | -0.0401769 | 0.3972035  |
| Least  | Hateful non-audience outdegree | -18        | -0.0229787 | 0.1105301 | -0.2675668 | 0.2216094  |
| Least  | Hateful non-audience outdegree | -17        | 0.0897866  | 0.0678671 | -0.0603940 | 0.2399672  |
| Least  | Hateful non-audience outdegree | -16        | 0.0066790  | 0.0654514 | -0.1381560 | 0.1515140  |
| Least  | Hateful non-audience outdegree | -15        | 0.0763555  | 0.0812295 | -0.1033942 | 0.2561053  |
| Least  | Hateful non-audience outdegree | -14        | -0.0983527 | 0.0307141 | -0.1663188 | -0.0303866 |
| Least  | Hateful non-audience outdegree | -13        | -0.2312936 | 0.1493050 | -0.5616851 | 0.0990979  |
| Least  | Hateful non-audience outdegree | -12        | 0.1317552  | 0.2045984 | -0.3209931 | 0.5845036  |
| Least  | Hateful non-audience outdegree | -11        | 0.0425993  | 0.0593971 | -0.0888383 | 0.1740370  |
| Least  | Hateful non-audience outdegree | -10        | -0.0585137 | 0.0765981 | -0.2280148 | 0.1109874  |
| Least  | Hateful non-audience outdegree | -9         | -0.0246959 | 0.1384039 | -0.3309647 | 0.2815729  |
| Least  | Hateful non-audience outdegree | -8         | -0.0026815 | 0.1001635 | -0.2243296 | 0.2189666  |
| Least  | Hateful non-audience outdegree | -7         | -0.1500119 | 0.0943674 | -0.3588341 | 0.0588104  |
| Least  | Hateful non-audience outdegree | -6         | -0.0724054 | 0.1120938 | -0.3204536 | 0.1756427  |
| Least  | Hateful non-audience outdegree | -5         | -0.0711291 | 0.0895734 | -0.2693428 | 0.1270846  |
| Least  | Hateful non-audience outdegree | -4         | 0.0101075  | 0.0803450 | -0.1676851 | 0.1879000  |
| Least  | Hateful non-audience outdegree | -3         | -0.1799472 | 0.1421855 | -0.4945843 | 0.1346899  |
| Least  | Hateful non-audience outdegree | -2         | 0.0148972  | 0.0916941 | -0.1880092 | 0.2178037  |
| Least  | Hateful non-audience outdegree | -1         | 0.0393893  | 0.1114156 | -0.2071582 | 0.2859368  |
| Least  | Hateful non-audience outdegree | 0          | -0.3617749 | 0.2372627 | -0.8868049 | 0.1632550  |
| Least  | Hateful non-audience outdegree | 1          | 0.1003425  | 0.0697662 | -0.0540406 | 0.2547256  |
| Least  | Hateful non-audience outdegree | 2          | 0.1050211  | 0.0785485 | -0.0687961 | 0.2788383  |
| Least  | Hateful non-audience outdegree | 3          | 0.2045180  | 0.1506541 | -0.1288590 | 0.5378949  |
| Least  | Hateful non-audience outdegree | 4          | 0.1432382  | 0.1135664 | -0.1080688 | 0.3945451  |

|       |                                |    |            |           |            |           |
|-------|--------------------------------|----|------------|-----------|------------|-----------|
| Least | Hateful non-audience outdegree | 5  | 0.2084839  | 0.1163866 | -0.0490636 | 0.4660315 |
| Least | Hateful non-audience outdegree | 6  | 0.1848776  | 0.1440835 | -0.1339595 | 0.5037148 |
| Least | Hateful non-audience outdegree | 7  | 0.1862668  | 0.1725595 | -0.1955838 | 0.5681174 |
| Least | Hateful non-audience outdegree | 8  | 0.2147757  | 0.1253725 | -0.0626565 | 0.4922079 |
| Least | Hateful non-audience outdegree | 9  | 0.2034766  | 0.3835189 | -0.6451982 | 1.0521514 |
| Least | Hateful non-audience outdegree | 10 | 0.2003189  | 0.3215475 | -0.5112216 | 0.9118594 |
| Least | Hateful non-audience outdegree | 11 | 0.2629216  | 0.2479645 | -0.2857898 | 0.8116330 |
| Least | Hateful non-audience outdegree | 12 | 0.2665460  | 0.3653366 | -0.5418938 | 1.0749859 |
| Least | Hateful non-audience outdegree | 13 | 0.1387656  | 0.1871899 | -0.2754600 | 0.5529912 |
| Least | Hateful non-audience outdegree | 14 | 0.2137554  | 0.5160440 | -0.9281795 | 1.3556902 |
| Least | Hateful non-audience outdegree | 15 | 0.2913027  | 0.4963379 | -0.8070251 | 1.3896306 |
| Least | Hateful non-audience outdegree | 16 | 0.2986126  | 0.6278673 | -1.0907718 | 1.6879970 |
| Least | Hateful non-audience outdegree | 17 | 0.2698072  | 0.6627193 | -1.1967000 | 1.7363144 |
| Least | Hateful non-audience outdegree | 18 | 0.3840097  | 0.4744906 | -0.6659731 | 1.4339926 |
| Least | Hateful non-audience outdegree | 19 | 0.2088558  | 0.5380792 | -0.9818400 | 1.3995516 |
| Least | Hateful non-audience outdegree | 20 | 0.2315801  | 0.5597507 | -1.0070716 | 1.4702317 |
| Least | Hateful non-audience outdegree | 21 | 0.2989674  | 0.7594943 | -1.3816896 | 1.9796245 |
| Least | Hateful non-audience outdegree | 22 | 0.2068198  | 0.3562151 | -0.5814356 | 0.9950752 |
| Least | Hateful non-audience outdegree | 23 | 0.2956656  | 0.5873876 | -1.0041428 | 1.5954741 |
| Least | Hateful non-audience outdegree | 24 | 0.3694684  | 0.5895514 | -0.9351282 | 1.6740651 |
| Least | Hateful non-audience outdegree | 25 | 0.3472106  | 0.6986645 | -1.1988384 | 1.8932595 |
| Least | Hateful non-audience outdegree | 26 | 0.2660339  | 0.7432379 | -1.3786500 | 1.9107178 |
| Least | Hateful non-audience outdegree | 27 | -0.3073884 | 2.8297095 | -6.5691485 | 5.9543717 |
| Least | Hateful non-audience outdegree | 28 | -0.1895547 | 2.2860509 | -5.2482727 | 4.8691632 |
| Least | Hateful non-audience outdegree | 29 | -0.1348731 | 2.0786603 | -4.7346640 | 4.4649178 |
| Least | Hateful non-audience outdegree | 30 | -0.1429421 | 1.2885888 | -2.9944128 | 2.7085285 |



**Robustness: Dynamic differences-in-differences (Callaway and Sant'Anna 2021) for short time frame with sampled control groups**

Views on hateful content

Average effect by length of exposure (Callaway and Sant'Anna)

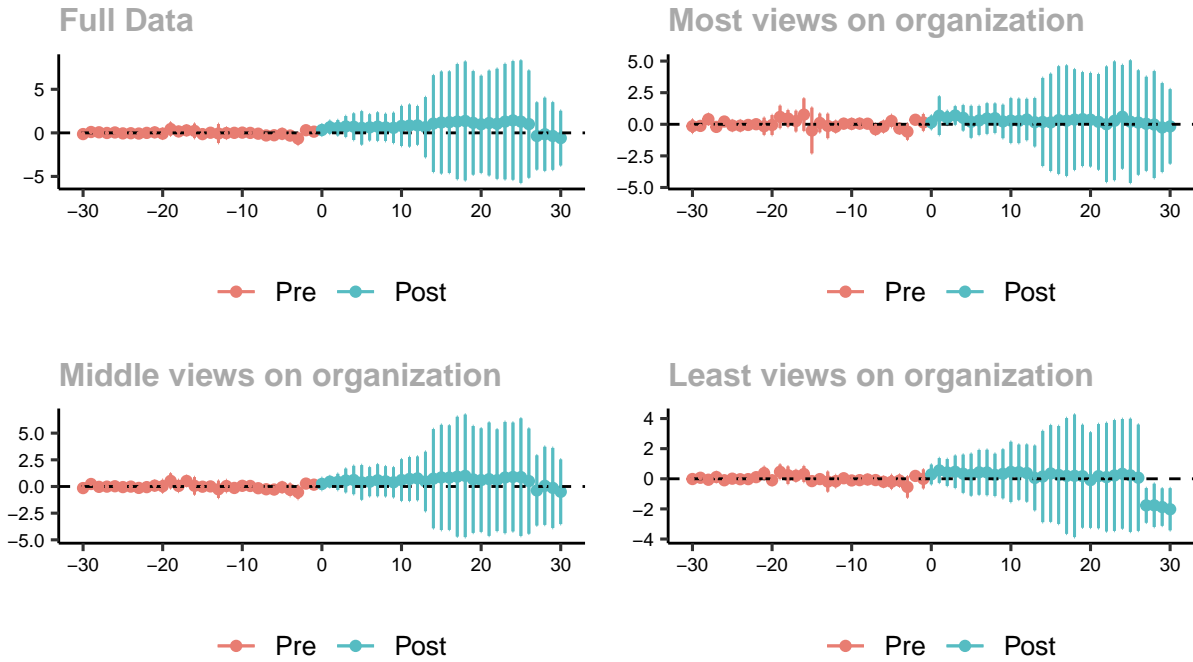

Long timeframe with sampled control groups

| sample | outcome                  | event.time | estimate   | std.error | conf.low   | conf.high |
|--------|--------------------------|------------|------------|-----------|------------|-----------|
| Full   | Views on hateful content | -30        | -0.1415501 | 0.1199598 | -0.4512977 | 0.1681975 |
| Full   | Views on hateful content | -29        | 0.0965897  | 0.0424639 | -0.0130561 | 0.2062354 |
| Full   | Views on hateful content | -28        | 0.0638345  | 0.0701894 | -0.1174011 | 0.2450700 |
| Full   | Views on hateful content | -27        | -0.0121928 | 0.0603576 | -0.1680418 | 0.1436561 |
| Full   | Views on hateful content | -26        | 0.0466527  | 0.0913582 | -0.1892429 | 0.2825482 |
| Full   | Views on hateful content | -25        | -0.0622994 | 0.1039609 | -0.3307363 | 0.2061375 |
| Full   | Views on hateful content | -24        | -0.0435349 | 0.0596648 | -0.1975950 | 0.1105252 |
| Full   | Views on hateful content | -23        | -0.0785737 | 0.0481208 | -0.2028260 | 0.0456787 |
| Full   | Views on hateful content | -22        | -0.0021421 | 0.0766115 | -0.1999603 | 0.1956760 |
| Full   | Views on hateful content | -21        | 0.0595144  | 0.2033999 | -0.4656835 | 0.5847122 |
| Full   | Views on hateful content | -20        | -0.0892152 | 0.2227073 | -0.6642665 | 0.4858361 |
| Full   | Views on hateful content | -19        | 0.4382365  | 0.2909452 | -0.3130117 | 1.1894846 |
| Full   | Views on hateful content | -18        | 0.1626173  | 0.1965499 | -0.3448933 | 0.6701278 |
| Full   | Views on hateful content | -17        | 0.2860609  | 0.2081013 | -0.2512763 | 0.8233981 |
| Full   | Views on hateful content | -16        | 0.2242095  | 0.3194679 | -0.6006869 | 1.0491059 |

|      |                          |     |            |           |            |           |
|------|--------------------------|-----|------------|-----------|------------|-----------|
| Full | Views on hateful content | -15 | -0.1433289 | 0.2015767 | -0.6638189 | 0.3771612 |
| Full | Views on hateful content | -14 | 0.0156900  | 0.0802706 | -0.1915762 | 0.2229563 |
| Full | Views on hateful content | -13 | -0.0776200 | 0.4212762 | -1.1653950 | 1.0101549 |
| Full | Views on hateful content | -12 | -0.0261428 | 0.2462923 | -0.6620927 | 0.6098072 |
| Full | Views on hateful content | -11 | 0.0042282  | 0.1335033 | -0.3404900 | 0.3489464 |
| Full | Views on hateful content | -10 | 0.0264619  | 0.1608890 | -0.3889687 | 0.4418925 |
| Full | Views on hateful content | -9  | -0.0017178 | 0.0589695 | -0.1539826 | 0.1505470 |
| Full | Views on hateful content | -8  | -0.0950574 | 0.0916079 | -0.3315978 | 0.1414830 |
| Full | Views on hateful content | -7  | -0.2969535 | 0.1433682 | -0.6671438 | 0.0732367 |
| Full | Views on hateful content | -6  | -0.2764810 | 0.1271063 | -0.6046816 | 0.0517196 |
| Full | Views on hateful content | -5  | -0.1100236 | 0.2235523 | -0.6872568 | 0.4672095 |
| Full | Views on hateful content | -4  | -0.3098016 | 0.1970878 | -0.8187010 | 0.1990977 |
| Full | Views on hateful content | -3  | -0.6516326 | 0.2733976 | -1.3575710 | 0.0543058 |
| Full | Views on hateful content | -2  | 0.3043354  | 0.0943297 | 0.0607670  | 0.5479037 |
| Full | Views on hateful content | -1  | 0.1390797  | 0.1556495 | -0.2628221 | 0.5409816 |
| Full | Views on hateful content | 0   | 0.3264885  | 0.2490622 | -0.3166137 | 0.9695906 |
| Full | Views on hateful content | 1   | 0.6455141  | 0.2895689 | -0.1021804 | 1.3932085 |
| Full | Views on hateful content | 2   | 0.5808065  | 0.3403313 | -0.2979612 | 1.4595743 |
| Full | Views on hateful content | 3   | 0.7366433  | 0.4609544 | -0.4535846 | 1.9268712 |
| Full | Views on hateful content | 4   | 0.7045301  | 0.5882910 | -0.8144930 | 2.2235531 |
| Full | Views on hateful content | 5   | 0.5683113  | 0.7378935 | -1.3369997 | 2.4736223 |
| Full | Views on hateful content | 6   | 0.6296860  | 0.5779697 | -0.8626865 | 2.1220585 |
| Full | Views on hateful content | 7   | 0.7196776  | 0.6274394 | -0.9004303 | 2.3397856 |
| Full | Views on hateful content | 8   | 0.6227902  | 0.6029352 | -0.9340456 | 2.1796260 |
| Full | Views on hateful content | 9   | 0.5711187  | 0.6692642 | -1.1569847 | 2.2992221 |
| Full | Views on hateful content | 10  | 0.7947511  | 0.8884956 | -1.4994286 | 3.0889309 |
| Full | Views on hateful content | 11  | 0.8394350  | 0.9290681 | -1.5595069 | 3.2383769 |
| Full | Views on hateful content | 12  | 0.8602878  | 0.8559729 | -1.3499153 | 3.0704909 |
| Full | Views on hateful content | 13  | 0.6536460  | 1.3335561 | -2.7897223 | 4.0970143 |
| Full | Views on hateful content | 14  | 1.0633073  | 2.1480813 | -4.4832421 | 6.6098568 |
| Full | Views on hateful content | 15  | 1.1879318  | 2.2623929 | -4.6537810 | 7.0296445 |
| Full | Views on hateful content | 16  | 1.2232917  | 2.2543129 | -4.5975577 | 7.0441412 |
| Full | Views on hateful content | 17  | 1.2938325  | 2.5565339 | -5.3073801 | 7.8950450 |
| Full | Views on hateful content | 18  | 1.3652559  | 2.6385695 | -5.4477805 | 8.1782923 |
| Full | Views on hateful content | 19  | 1.1481527  | 2.2979633 | -4.7854063 | 7.0817116 |
| Full | Views on hateful content | 20  | 0.9836128  | 2.1570175 | -4.5860107 | 6.5532364 |
| Full | Views on hateful content | 21  | 1.1275317  | 2.3269465 | -4.8808645 | 7.1359278 |
| Full | Views on hateful content | 22  | 1.0440213  | 2.4440023 | -5.2666242 | 7.3546668 |
| Full | Views on hateful content | 23  | 1.2922130  | 2.5634114 | -5.3267579 | 7.9111838 |
| Full | Views on hateful content | 24  | 1.4288045  | 2.6350441 | -5.3751290 | 8.2327380 |
| Full | Views on hateful content | 25  | 1.2868524  | 2.7212453 | -5.7396606 | 8.3133653 |

|      |                          |    |            |           |            |           |
|------|--------------------------|----|------------|-----------|------------|-----------|
| Full | Views on hateful content | 26 | 1.0040433  | 2.3800941 | -5.1415849 | 7.1496716 |
| Full | Views on hateful content | 27 | -0.3569084 | 1.4913951 | -4.2078318 | 3.4940149 |
| Full | Views on hateful content | 28 | -0.1597078 | 1.6222436 | -4.3484943 | 4.0290788 |
| Full | Views on hateful content | 29 | -0.3603887 | 1.4996336 | -4.2325846 | 3.5118073 |
| Full | Views on hateful content | 30 | -0.6005315 | 1.2121016 | -3.7302926 | 2.5292295 |

| sample | outcome                  | event.time | estimate   | std.error | conf.low   | conf.high  |
|--------|--------------------------|------------|------------|-----------|------------|------------|
| Most   | Views on hateful content | -30        | -0.1491549 | 0.2046496 | -0.6730999 | 0.3747902  |
| Most   | Views on hateful content | -29        | -0.1273845 | 0.0472810 | -0.2484335 | -0.0063354 |
| Most   | Views on hateful content | -28        | 0.4005425  | 0.1641627 | -0.0197479 | 0.8208328  |
| Most   | Views on hateful content | -27        | -0.2051393 | 0.1226731 | -0.5192077 | 0.1089290  |
| Most   | Views on hateful content | -26        | 0.2186495  | 0.1044078 | -0.0486560 | 0.4859550  |
| Most   | Views on hateful content | -25        | -0.1012121 | 0.1633234 | -0.5193536 | 0.3169294  |
| Most   | Views on hateful content | -24        | -0.1105709 | 0.1649158 | -0.5327892 | 0.3116475  |
| Most   | Views on hateful content | -23        | -0.0516073 | 0.0900899 | -0.2822559 | 0.1790413  |
| Most   | Views on hateful content | -22        | 0.0058157  | 0.0920258 | -0.2297893 | 0.2414207  |
| Most   | Views on hateful content | -21        | -0.1552784 | 0.2625410 | -0.8274373 | 0.5168806  |
| Most   | Views on hateful content | -20        | -0.0565413 | 0.3055023 | -0.8386901 | 0.7256074  |
| Most   | Views on hateful content | -19        | 0.5834529  | 0.3455374 | -0.3011937 | 1.4680995  |
| Most   | Views on hateful content | -18        | 0.4558088  | 0.2594907 | -0.2085407 | 1.1201583  |
| Most   | Views on hateful content | -17        | 0.2538064  | 0.3193146 | -0.5637047 | 1.0713175  |
| Most   | Views on hateful content | -16        | 0.7644327  | 0.4994807 | -0.5143405 | 2.0432060  |
| Most   | Views on hateful content | -15        | -0.4897851 | 0.7044014 | -2.2931976 | 1.3136273  |
| Most   | Views on hateful content | -14        | 0.1050672  | 0.2877117 | -0.6315339 | 0.8416683  |
| Most   | Views on hateful content | -13        | -0.1292572 | 0.3760254 | -1.0919594 | 0.8334449  |
| Most   | Views on hateful content | -12        | -0.1855650 | 0.1783897 | -0.6422792 | 0.2711493  |
| Most   | Views on hateful content | -11        | 0.0499861  | 0.1388022 | -0.3053760 | 0.4053482  |
| Most   | Views on hateful content | -10        | 0.0325999  | 0.1574934 | -0.3706155 | 0.4358154  |
| Most   | Views on hateful content | -9         | 0.0510342  | 0.1480586 | -0.3280261 | 0.4300945  |
| Most   | Views on hateful content | -8         | 0.0450813  | 0.1112398 | -0.2397155 | 0.3298781  |
| Most   | Views on hateful content | -7         | -0.3898781 | 0.1674852 | -0.8186747 | 0.0389184  |
| Most   | Views on hateful content | -6         | -0.1812654 | 0.1792281 | -0.6401262 | 0.2775954  |
| Most   | Views on hateful content | -5         | 0.2624497  | 0.1860994 | -0.2140030 | 0.7389024  |
| Most   | Views on hateful content | -4         | -0.3335519 | 0.1531933 | -0.7257582 | 0.0586545  |
| Most   | Views on hateful content | -3         | -0.5796746 | 0.2491761 | -1.2176166 | 0.0582674  |
| Most   | Views on hateful content | -2         | 0.3579821  | 0.1186929 | 0.0541039  | 0.6618602  |
| Most   | Views on hateful content | -1         | 0.1471289  | 0.2568017 | -0.5103361 | 0.8045940  |
| Most   | Views on hateful content | 0          | 0.1516155  | 0.2109560 | -0.3884751 | 0.6917062  |
| Most   | Views on hateful content | 1          | 0.6786746  | 0.5956885 | -0.8464104 | 2.2037596  |
| Most   | Views on hateful content | 2          | 0.5110269  | 0.2154628 | -0.0406021 | 1.0626558  |
| Most   | Views on hateful content | 3          | 0.6972397  | 0.2845723 | -0.0313239 | 1.4258032  |

|      |                          |    |            |           |            |           |
|------|--------------------------|----|------------|-----------|------------|-----------|
| Most | Views on hateful content | 4  | 0.5100972  | 0.3915663 | -0.4923928 | 1.5125873 |
| Most | Views on hateful content | 5  | 0.1955168  | 0.4920032 | -1.0641124 | 1.4551459 |
| Most | Views on hateful content | 6  | 0.3051642  | 0.4468220 | -0.8387920 | 1.4491204 |
| Most | Views on hateful content | 7  | 0.4541499  | 0.4714165 | -0.7527732 | 1.6610729 |
| Most | Views on hateful content | 8  | 0.4797969  | 0.4541085 | -0.6828141 | 1.6424078 |
| Most | Views on hateful content | 9  | 0.2236901  | 0.5155468 | -1.0962157 | 1.5435959 |
| Most | Views on hateful content | 10 | 0.2924721  | 0.6897833 | -1.4735148 | 2.0584589 |
| Most | Views on hateful content | 11 | 0.2681321  | 0.6853146 | -1.4864140 | 2.0226782 |
| Most | Views on hateful content | 12 | 0.3793847  | 0.6373249 | -1.2522980 | 2.0110674 |
| Most | Views on hateful content | 13 | 0.1606488  | 0.7453151 | -1.7475109 | 2.0688084 |
| Most | Views on hateful content | 14 | 0.1832502  | 1.3601422 | -3.2989932 | 3.6654935 |
| Most | Views on hateful content | 15 | 0.1486476  | 1.5016330 | -3.6958414 | 3.9931367 |
| Most | Views on hateful content | 16 | 0.3315466  | 1.6600329 | -3.9184787 | 4.5815718 |
| Most | Views on hateful content | 17 | 0.2848673  | 1.7046056 | -4.0792733 | 4.6490079 |
| Most | Views on hateful content | 18 | 0.3731277  | 1.5511515 | -3.5981388 | 4.3443942 |
| Most | Views on hateful content | 19 | 0.4082842  | 1.4491290 | -3.3017838 | 4.1183522 |
| Most | Views on hateful content | 20 | 0.3642263  | 1.4432872 | -3.3308855 | 4.0593380 |
| Most | Views on hateful content | 21 | 0.1965022  | 1.4747135 | -3.5790674 | 3.9720718 |
| Most | Views on hateful content | 22 | 0.0055629  | 1.7807467 | -4.5535146 | 4.5646404 |
| Most | Views on hateful content | 23 | 0.2736996  | 1.8311265 | -4.4143604 | 4.9617596 |
| Most | Views on hateful content | 24 | 0.5951903  | 1.6001976 | -3.5016444 | 4.6920250 |
| Most | Views on hateful content | 25 | 0.2084762  | 1.8912787 | -4.6335859 | 5.0505383 |
| Most | Views on hateful content | 26 | 0.1388170  | 1.6099155 | -3.9828975 | 4.2605315 |
| Most | Views on hateful content | 27 | 0.0409036  | 1.4502142 | -3.6719426 | 3.7537498 |
| Most | Views on hateful content | 28 | -0.0228698 | 1.6504888 | -4.2484602 | 4.2027207 |
| Most | Views on hateful content | 29 | -0.2550860 | 1.3710614 | -3.7652850 | 3.2551130 |
| Most | Views on hateful content | 30 | -0.1687814 | 1.1474307 | -3.1064398 | 2.7688770 |

| sample | outcome                  | event.time | estimate   | std.error | conf.low   | conf.high |
|--------|--------------------------|------------|------------|-----------|------------|-----------|
| Middle | Views on hateful content | -30        | -0.1495147 | 0.1136939 | -0.4435810 | 0.1445516 |
| Middle | Views on hateful content | -29        | 0.2324614  | 0.0427576 | 0.1218700  | 0.3430528 |
| Middle | Views on hateful content | -28        | -0.0351514 | 0.0869426 | -0.2600261 | 0.1897234 |
| Middle | Views on hateful content | -27        | -0.0122974 | 0.0828702 | -0.2266392 | 0.2020443 |
| Middle | Views on hateful content | -26        | 0.0230180  | 0.0972081 | -0.2284081 | 0.2744441 |
| Middle | Views on hateful content | -25        | -0.0562612 | 0.1122081 | -0.3464847 | 0.2339622 |
| Middle | Views on hateful content | -24        | -0.0093383 | 0.0672063 | -0.1831658 | 0.1644892 |
| Middle | Views on hateful content | -23        | -0.1333732 | 0.0523303 | -0.2687243 | 0.0019778 |
| Middle | Views on hateful content | -22        | -0.0588671 | 0.0966270 | -0.3087903 | 0.1910562 |
| Middle | Views on hateful content | -21        | 0.0779138  | 0.1788271 | -0.3846177 | 0.5404454 |
| Middle | Views on hateful content | -20        | 0.0260150  | 0.2290507 | -0.5664186 | 0.6184486 |
| Middle | Views on hateful content | -19        | 0.5248909  | 0.2696392 | -0.1725238 | 1.2223057 |

|        |                          |     |            |           |            |           |
|--------|--------------------------|-----|------------|-----------|------------|-----------|
| Middle | Views on hateful content | -18 | 0.0553590  | 0.2126405 | -0.4946301 | 0.6053482 |
| Middle | Views on hateful content | -17 | 0.5178001  | 0.1813014 | 0.0488686  | 0.9867315 |
| Middle | Views on hateful content | -16 | 0.0618830  | 0.3141430 | -0.7506398 | 0.8744057 |
| Middle | Views on hateful content | -15 | -0.0184961 | 0.1118953 | -0.3079104 | 0.2709182 |
| Middle | Views on hateful content | -14 | 0.0074757  | 0.0969890 | -0.2433839 | 0.2583352 |
| Middle | Views on hateful content | -13 | -0.2620242 | 0.3094009 | -1.0622817 | 0.5382332 |
| Middle | Views on hateful content | -12 | 0.0407714  | 0.2148190 | -0.5148524 | 0.5963953 |
| Middle | Views on hateful content | -11 | -0.1364966 | 0.1456348 | -0.5131771 | 0.2401840 |
| Middle | Views on hateful content | -10 | 0.0640705  | 0.1616417 | -0.3540115 | 0.4821525 |
| Middle | Views on hateful content | -9  | 0.0505879  | 0.0620949 | -0.1100189 | 0.2111948 |
| Middle | Views on hateful content | -8  | -0.1615039 | 0.1168985 | -0.4638588 | 0.1408510 |
| Middle | Views on hateful content | -7  | -0.2586017 | 0.1592740 | -0.6705598 | 0.1533564 |
| Middle | Views on hateful content | -6  | -0.2876581 | 0.1518444 | -0.6803996 | 0.1050833 |
| Middle | Views on hateful content | -5  | -0.0692669 | 0.1857900 | -0.5498078 | 0.4112740 |
| Middle | Views on hateful content | -4  | -0.3042320 | 0.2270416 | -0.8914693 | 0.2830053 |
| Middle | Views on hateful content | -3  | -0.5362855 | 0.2449549 | -1.1698550 | 0.0972840 |
| Middle | Views on hateful content | -2  | 0.2706215  | 0.0835300 | 0.0545734  | 0.4866695 |
| Middle | Views on hateful content | -1  | 0.1709803  | 0.1554578 | -0.2311073 | 0.5730679 |
| Middle | Views on hateful content | 0   | 0.2379535  | 0.2170094 | -0.3233358 | 0.7992427 |
| Middle | Views on hateful content | 1   | 0.4493254  | 0.1979983 | -0.0627922 | 0.9614430 |
| Middle | Views on hateful content | 2   | 0.4299319  | 0.2918258 | -0.3248680 | 1.1847318 |
| Middle | Views on hateful content | 3   | 0.5632028  | 0.4282758 | -0.5445216 | 1.6709271 |
| Middle | Views on hateful content | 4   | 0.6083636  | 0.5129056 | -0.7182534 | 1.9349805 |
| Middle | Views on hateful content | 5   | 0.3842074  | 0.6256706 | -1.2340734 | 2.0024883 |
| Middle | Views on hateful content | 6   | 0.4448669  | 0.5241852 | -0.9109246 | 1.8006585 |
| Middle | Views on hateful content | 7   | 0.5818459  | 0.5766096 | -0.9095399 | 2.0732317 |
| Middle | Views on hateful content | 8   | 0.4851926  | 0.5428489 | -0.9188720 | 1.8892571 |
| Middle | Views on hateful content | 9   | 0.3936094  | 0.5417739 | -1.0076748 | 1.7948935 |
| Middle | Views on hateful content | 10  | 0.6050973  | 0.7498277 | -1.3343126 | 2.5445073 |
| Middle | Views on hateful content | 11  | 0.7062606  | 0.7912811 | -1.3403674 | 2.7528885 |
| Middle | Views on hateful content | 12  | 0.7601698  | 0.7893534 | -1.2814724 | 2.8018120 |
| Middle | Views on hateful content | 13  | 0.4687235  | 1.0757613 | -2.3137052 | 3.2511522 |
| Middle | Views on hateful content | 14  | 0.7333350  | 1.7953065 | -3.9101789 | 5.3768488 |
| Middle | Views on hateful content | 15  | 0.8487888  | 1.9054793 | -4.0796841 | 5.7772618 |
| Middle | Views on hateful content | 16  | 0.8317346  | 1.8903651 | -4.0576456 | 5.7211149 |
| Middle | Views on hateful content | 17  | 0.9214044  | 2.1689660 | -4.6885701 | 6.5313789 |
| Middle | Views on hateful content | 18  | 0.9975939  | 2.2184869 | -4.7404650 | 6.7356528 |
| Middle | Views on hateful content | 19  | 0.6620854  | 1.9336861 | -4.3393437 | 5.6635145 |
| Middle | Views on hateful content | 20  | 0.5969201  | 1.8735428 | -4.2489497 | 5.4427899 |
| Middle | Views on hateful content | 21  | 0.6865527  | 2.0519751 | -4.6208276 | 5.9939331 |
| Middle | Views on hateful content | 22  | 0.5881121  | 1.8415461 | -4.1749992 | 5.3512235 |

|        |                          |    |            |           |            |           |
|--------|--------------------------|----|------------|-----------|------------|-----------|
| Middle | Views on hateful content | 23 | 0.8414855  | 2.0145014 | -4.3689702 | 6.0519411 |
| Middle | Views on hateful content | 24 | 0.8921970  | 1.9704585 | -4.2043427 | 5.9887367 |
| Middle | Views on hateful content | 25 | 0.8771073  | 2.1281648 | -4.6273358 | 6.3815504 |
| Middle | Views on hateful content | 26 | 0.5052619  | 1.9030682 | -4.4169747 | 5.4274984 |
| Middle | Views on hateful content | 27 | -0.3702813 | 1.2694580 | -3.6537015 | 2.9131389 |
| Middle | Views on hateful content | 28 | 0.0658173  | 1.4135234 | -3.5902243 | 3.7218589 |
| Middle | Views on hateful content | 29 | -0.1354885 | 1.4499413 | -3.8857241 | 3.6147471 |
| Middle | Views on hateful content | 30 | -0.4968963 | 1.1686986 | -3.5197050 | 2.5259124 |

| sample | outcome                  | event.time | estimate   | std.error | conf.low   | conf.high |
|--------|--------------------------|------------|------------|-----------|------------|-----------|
| Least  | Views on hateful content | -30        | -0.0163019 | 0.0905504 | -0.2460845 | 0.2134807 |
| Least  | Views on hateful content | -29        | 0.0683391  | 0.0565071 | -0.0750544 | 0.2117326 |
| Least  | Views on hateful content | -28        | -0.0631227 | 0.0976100 | -0.3108200 | 0.1845746 |
| Least  | Views on hateful content | -27        | 0.1171065  | 0.1288606 | -0.2098929 | 0.4441058 |
| Least  | Views on hateful content | -26        | -0.0990748 | 0.1067256 | -0.3699040 | 0.1717544 |
| Least  | Views on hateful content | -25        | 0.0074552  | 0.0877781 | -0.2152923 | 0.2302028 |
| Least  | Views on hateful content | -24        | -0.0294869 | 0.0766126 | -0.2239006 | 0.1649268 |
| Least  | Views on hateful content | -23        | -0.0228799 | 0.0475984 | -0.1436665 | 0.0979067 |
| Least  | Views on hateful content | -22        | 0.1074203  | 0.0783967 | -0.0915207 | 0.3063613 |
| Least  | Views on hateful content | -21        | 0.3722235  | 0.1684273 | -0.0551812 | 0.7996281 |
| Least  | Views on hateful content | -20        | -0.0987267 | 0.1244885 | -0.4146314 | 0.2171780 |
| Least  | Views on hateful content | -19        | 0.4639484  | 0.1892985 | -0.0164195 | 0.9443163 |
| Least  | Views on hateful content | -18        | 0.2388854  | 0.2270218 | -0.3372099 | 0.8149807 |
| Least  | Views on hateful content | -17        | 0.2028965  | 0.1475834 | -0.1716141 | 0.5774071 |
| Least  | Views on hateful content | -16        | 0.3156774  | 0.2047134 | -0.2038077 | 0.8351625 |
| Least  | Views on hateful content | -15        | -0.1541945 | 0.1105940 | -0.4348401 | 0.1264511 |
| Least  | Views on hateful content | -14        | -0.0217327 | 0.0558855 | -0.1635488 | 0.1200834 |
| Least  | Views on hateful content | -13        | -0.1865527 | 0.2605604 | -0.8477562 | 0.4746509 |
| Least  | Views on hateful content | -12        | -0.1593823 | 0.1580478 | -0.5604477 | 0.2416831 |
| Least  | Views on hateful content | -11        | 0.0354531  | 0.0912917 | -0.1962106 | 0.2671168 |
| Least  | Views on hateful content | -10        | -0.1121691 | 0.1032132 | -0.3740850 | 0.1497468 |
| Least  | Views on hateful content | -9         | -0.0906441 | 0.0896889 | -0.3182405 | 0.1369522 |
| Least  | Views on hateful content | -8         | -0.0466102 | 0.1206273 | -0.3527166 | 0.2594962 |
| Least  | Views on hateful content | -7         | -0.0846656 | 0.0848814 | -0.3000623 | 0.1307311 |
| Least  | Views on hateful content | -6         | -0.2009449 | 0.1324137 | -0.5369606 | 0.1350708 |
| Least  | Views on hateful content | -5         | -0.2035701 | 0.1804804 | -0.6615610 | 0.2544208 |
| Least  | Views on hateful content | -4         | -0.1216974 | 0.1557584 | -0.5169532 | 0.2735584 |
| Least  | Views on hateful content | -3         | -0.5433020 | 0.2754198 | -1.2422131 | 0.1556091 |
| Least  | Views on hateful content | -2         | 0.1890230  | 0.0757539 | -0.0032118 | 0.3812577 |
| Least  | Views on hateful content | -1         | -0.0076619 | 0.2462822 | -0.6326327 | 0.6173089 |
| Least  | Views on hateful content | 0          | 0.2882546  | 0.2563359 | -0.3622287 | 0.9387380 |

|       |                          |    |            |           |            |            |
|-------|--------------------------|----|------------|-----------|------------|------------|
| Least | Views on hateful content | 1  | 0.5538792  | 0.3217729 | -0.2626585 | 1.3704169  |
| Least | Views on hateful content | 2  | 0.4201072  | 0.3509285 | -0.4704161 | 1.3106306  |
| Least | Views on hateful content | 3  | 0.4659760  | 0.4218020 | -0.6043975 | 1.5363495  |
| Least | Views on hateful content | 4  | 0.3370378  | 0.4977211 | -0.9259896 | 1.6000652  |
| Least | Views on hateful content | 5  | 0.2714737  | 0.5477613 | -1.1185368 | 1.6614843  |
| Least | Views on hateful content | 6  | 0.4294803  | 0.5849298 | -1.0548499 | 1.9138104  |
| Least | Views on hateful content | 7  | 0.4197672  | 0.5935900 | -1.0865392 | 1.9260735  |
| Least | Views on hateful content | 8  | 0.2605599  | 0.5523128 | -1.1410004 | 1.6621203  |
| Least | Views on hateful content | 9  | 0.3294673  | 0.6393484 | -1.2929564 | 1.9518910  |
| Least | Views on hateful content | 10 | 0.4571572  | 0.7877782 | -1.5419251 | 2.4562395  |
| Least | Views on hateful content | 11 | 0.4384724  | 0.7202082 | -1.3891430 | 2.2660879  |
| Least | Views on hateful content | 12 | 0.3799228  | 0.7462313 | -1.5137293 | 2.2735749  |
| Least | Views on hateful content | 13 | 0.0560394  | 0.8449672 | -2.0881669 | 2.2002458  |
| Least | Views on hateful content | 14 | 0.1512627  | 1.1930147 | -2.8761563 | 3.1786817  |
| Least | Views on hateful content | 15 | 0.3523232  | 1.2634759 | -2.8538996 | 3.5585460  |
| Least | Views on hateful content | 16 | 0.2546532  | 1.2806843 | -2.9952380 | 3.5045444  |
| Least | Views on hateful content | 17 | 0.1907335  | 1.5118374 | -3.6457365 | 4.0272035  |
| Least | Views on hateful content | 18 | 0.1949610  | 1.6017537 | -3.8696824 | 4.2596045  |
| Least | Views on hateful content | 19 | 0.1725696  | 1.3431605 | -3.2358624 | 3.5810015  |
| Least | Views on hateful content | 20 | -0.0860957 | 1.2466295 | -3.2495687 | 3.0773772  |
| Least | Views on hateful content | 21 | 0.1756161  | 1.3616451 | -3.2797229 | 3.6309550  |
| Least | Views on hateful content | 22 | 0.1104937  | 1.4182621 | -3.4885178 | 3.7095051  |
| Least | Views on hateful content | 23 | 0.2189236  | 1.4486435 | -3.4571842 | 3.8950315  |
| Least | Views on hateful content | 24 | 0.3316479  | 1.4319175 | -3.3020156 | 3.9653115  |
| Least | Views on hateful content | 25 | 0.2307322  | 1.4778913 | -3.5195955 | 3.9810599  |
| Least | Views on hateful content | 26 | 0.0714056  | 1.3884692 | -3.4520027 | 3.5948138  |
| Least | Views on hateful content | 27 | -1.7667599 | 0.4513306 | -2.9120658 | -0.6214540 |
| Least | Views on hateful content | 28 | -1.7634212 | 0.5649560 | -3.1970653 | -0.3297772 |
| Least | Views on hateful content | 29 | -1.8784675 | 0.4879249 | -3.1166359 | -0.6402992 |
| Least | Views on hateful content | 30 | -2.0231656 | 0.5490991 | -3.4165708 | -0.6297603 |

## Views on hateful content/total views

Average effect by length of exposure (Callaway and Sant'Anna)

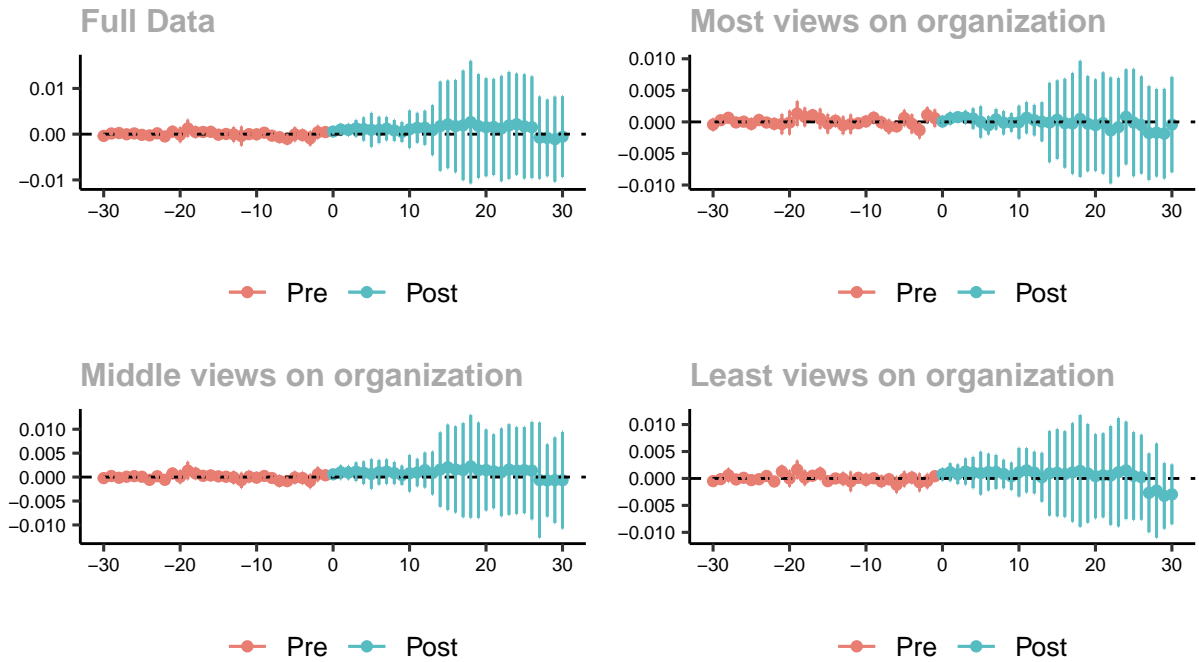

Long timeframe with sampled control groups

| sample | outcome                              | event.time | estimate   | std.error | conf.low   | conf.high |
|--------|--------------------------------------|------------|------------|-----------|------------|-----------|
| Full   | Views on hateful content/total views | -30        | -0.0003835 | 0.0002002 | -0.0008975 | 0.0001304 |
| Full   | Views on hateful content/total views | -29        | 0.0001506  | 0.0001601 | -0.0002602 | 0.0005614 |
| Full   | Views on hateful content/total views | -28        | 0.0002477  | 0.0002559 | -0.0004091 | 0.0009044 |
| Full   | Views on hateful content/total views | -27        | -0.0000272 | 0.0002276 | -0.0006113 | 0.0005569 |
| Full   | Views on hateful content/total views | -26        | 0.0001613  | 0.0002203 | -0.0004043 | 0.0007268 |
| Full   | Views on hateful content/total views | -25        | -0.0001468 | 0.0002485 | -0.0007848 | 0.0004911 |
| Full   | Views on hateful content/total views | -24        | -0.0002676 | 0.0002561 | -0.0009248 | 0.0003896 |
| Full   | Views on hateful content/total views | -23        | 0.0001850  | 0.0002761 | -0.0005237 | 0.0008938 |
| Full   | Views on hateful content/total views | -22        | -0.0004981 | 0.0002245 | -0.0010741 | 0.0000780 |
| Full   | Views on hateful content/total views | -21        | 0.0005464  | 0.0004516 | -0.0006126 | 0.0017053 |
| Full   | Views on hateful content/total views | -20        | -0.0001295 | 0.0006356 | -0.0017609 | 0.0015018 |
| Full   | Views on hateful content/total views | -19        | 0.0012700  | 0.0007352 | -0.0006171 | 0.0031571 |
| Full   | Views on hateful content/total views | -18        | 0.0004713  | 0.0004709 | -0.0007373 | 0.0016799 |
| Full   | Views on hateful content/total views | -17        | 0.0004835  | 0.0002437 | -0.0001419 | 0.0011089 |
| Full   | Views on hateful content/total views | -16        | 0.0005136  | 0.0003949 | -0.0005001 | 0.0015272 |
| Full   | Views on hateful content/total views | -15        | -0.0001156 | 0.0003708 | -0.0010673 | 0.0008361 |
| Full   | Views on hateful content/total views | -14        | 0.0000425  | 0.0002267 | -0.0005392 | 0.0006243 |
| Full   | Views on hateful content/total views | -13        | -0.0000514 | 0.0006298 | -0.0016679 | 0.0015651 |
| Full   | Views on hateful content/total views | -12        | -0.0004130 | 0.0008090 | -0.0024893 | 0.0016633 |



|      |                                      |     |            |           |            |           |
|------|--------------------------------------|-----|------------|-----------|------------|-----------|
| Full | Views on hateful content/total views | -11 | 0.0000083  | 0.0003459 | -0.0008795 | 0.0008961 |
| Full | Views on hateful content/total views | -10 | -0.0000392 | 0.0004152 | -0.0011049 | 0.0010265 |
| Full | Views on hateful content/total views | -9  | 0.0003163  | 0.0002750 | -0.0003895 | 0.0010220 |
| Full | Views on hateful content/total views | -8  | -0.0003280 | 0.0003630 | -0.0012596 | 0.0006036 |
| Full | Views on hateful content/total views | -7  | -0.0006675 | 0.0004144 | -0.0017312 | 0.0003961 |
| Full | Views on hateful content/total views | -6  | -0.0010189 | 0.0004478 | -0.0021683 | 0.0001305 |
| Full | Views on hateful content/total views | -5  | -0.0000287 | 0.0005938 | -0.0015528 | 0.0014955 |
| Full | Views on hateful content/total views | -4  | -0.0002082 | 0.0004804 | -0.0014412 | 0.0010249 |
| Full | Views on hateful content/total views | -3  | -0.0009052 | 0.0006106 | -0.0024723 | 0.0006619 |
| Full | Views on hateful content/total views | -2  | 0.0004157  | 0.0005589 | -0.0010188 | 0.0018502 |
| Full | Views on hateful content/total views | -1  | 0.0004638  | 0.0003158 | -0.0003466 | 0.0012743 |
| Full | Views on hateful content/total views | 0   | 0.0005800  | 0.0002713 | -0.0001164 | 0.0012764 |
| Full | Views on hateful content/total views | 1   | 0.0010171  | 0.0004602 | -0.0001639 | 0.0021982 |
| Full | Views on hateful content/total views | 2   | 0.0009418  | 0.0004926 | -0.0003226 | 0.0022062 |
| Full | Views on hateful content/total views | 3   | 0.0012604  | 0.0007074 | -0.0005553 | 0.0030761 |
| Full | Views on hateful content/total views | 4   | 0.0011170  | 0.0009824 | -0.0014043 | 0.0036383 |
| Full | Views on hateful content/total views | 5   | 0.0009433  | 0.0014402 | -0.0027530 | 0.0046396 |
| Full | Views on hateful content/total views | 6   | 0.0009296  | 0.0011161 | -0.0019349 | 0.0037941 |
| Full | Views on hateful content/total views | 7   | 0.0012043  | 0.0009891 | -0.0013344 | 0.0037430 |
| Full | Views on hateful content/total views | 8   | 0.0008090  | 0.0008907 | -0.0014770 | 0.0030949 |
| Full | Views on hateful content/total views | 9   | 0.0004799  | 0.0008446 | -0.0016880 | 0.0026478 |
| Full | Views on hateful content/total views | 10  | 0.0010777  | 0.0015858 | -0.0029925 | 0.0051479 |
| Full | Views on hateful content/total views | 11  | 0.0013886  | 0.0012698 | -0.0018705 | 0.0046477 |
| Full | Views on hateful content/total views | 12  | 0.0013966  | 0.0014519 | -0.0023297 | 0.0051230 |
| Full | Views on hateful content/total views | 13  | 0.0008775  | 0.0021231 | -0.0045717 | 0.0063267 |
| Full | Views on hateful content/total views | 14  | 0.0017450  | 0.0037940 | -0.0079928 | 0.0114828 |
| Full | Views on hateful content/total views | 15  | 0.0021376  | 0.0037329 | -0.0074433 | 0.0117185 |
| Full | Views on hateful content/total views | 16  | 0.0017540  | 0.0039222 | -0.0083127 | 0.0118206 |
| Full | Views on hateful content/total views | 17  | 0.0019276  | 0.0046662 | -0.0100486 | 0.0139039 |
| Full | Views on hateful content/total views | 18  | 0.0026411  | 0.0052152 | -0.0107444 | 0.0160265 |
| Full | Views on hateful content/total views | 19  | 0.0017707  | 0.0044175 | -0.0095672 | 0.0131086 |
| Full | Views on hateful content/total views | 20  | 0.0015181  | 0.0041753 | -0.0091984 | 0.0122346 |
| Full | Views on hateful content/total views | 21  | 0.0015761  | 0.0040904 | -0.0089225 | 0.0120746 |
| Full | Views on hateful content/total views | 22  | 0.0012286  | 0.0044836 | -0.0102790 | 0.0127363 |
| Full | Views on hateful content/total views | 23  | 0.0019076  | 0.0045559 | -0.0097855 | 0.0136007 |
| Full | Views on hateful content/total views | 24  | 0.0021841  | 0.0043011 | -0.0088551 | 0.0132234 |
| Full | Views on hateful content/total views | 25  | 0.0017019  | 0.0044334 | -0.0096770 | 0.0130808 |
| Full | Views on hateful content/total views | 26  | 0.0015131  | 0.0043279 | -0.0095948 | 0.0126211 |
| Full | Views on hateful content/total views | 27  | -0.0007594 | 0.0034944 | -0.0097281 | 0.0082093 |
| Full | Views on hateful content/total views | 28  | -0.0008132 | 0.0032592 | -0.0091782 | 0.0075518 |
| Full | Views on hateful content/total views | 29  | -0.0010924 | 0.0036182 | -0.0103789 | 0.0081941 |

|      |                                      |    |            |           |            |           |
|------|--------------------------------------|----|------------|-----------|------------|-----------|
| Full | Views on hateful content/total views | 30 | -0.0005462 | 0.0034334 | -0.0093584 | 0.0082660 |
|------|--------------------------------------|----|------------|-----------|------------|-----------|

| sample | outcome                              | event.time | estimate   | std.error | conf.low   | conf.high  |
|--------|--------------------------------------|------------|------------|-----------|------------|------------|
| Most   | Views on hateful content/total views | -30        | -0.0004307 | 0.0003748 | -0.0013830 | 0.0005216  |
| Most   | Views on hateful content/total views | -29        | 0.0002631  | 0.0002126 | -0.0002770 | 0.0008032  |
| Most   | Views on hateful content/total views | -28        | 0.0006517  | 0.0002354 | 0.0000535  | 0.0012498  |
| Most   | Views on hateful content/total views | -27        | -0.0000848 | 0.0002263 | -0.0006598 | 0.0004901  |
| Most   | Views on hateful content/total views | -26        | 0.0000371  | 0.0002138 | -0.0005061 | 0.0005802  |
| Most   | Views on hateful content/total views | -25        | -0.0003267 | 0.0003369 | -0.0011826 | 0.0005292  |
| Most   | Views on hateful content/total views | -24        | 0.0003004  | 0.0003136 | -0.0004962 | 0.0010970  |
| Most   | Views on hateful content/total views | -23        | -0.0001008 | 0.0002667 | -0.0007782 | 0.0005766  |
| Most   | Views on hateful content/total views | -22        | -0.0003017 | 0.0003409 | -0.0011678 | 0.0005645  |
| Most   | Views on hateful content/total views | -21        | -0.0003423 | 0.0006267 | -0.0019344 | 0.0012498  |
| Most   | Views on hateful content/total views | -20        | -0.0001062 | 0.0007413 | -0.0019893 | 0.0017770  |
| Most   | Views on hateful content/total views | -19        | 0.0013260  | 0.0007743 | -0.0006410 | 0.0032930  |
| Most   | Views on hateful content/total views | -18        | 0.0007805  | 0.0005836 | -0.0007022 | 0.0022631  |
| Most   | Views on hateful content/total views | -17        | 0.0010634  | 0.0003255 | 0.0002365  | 0.0018903  |
| Most   | Views on hateful content/total views | -16        | 0.0005035  | 0.0006227 | -0.0010785 | 0.0020855  |
| Most   | Views on hateful content/total views | -15        | -0.0002865 | 0.0006021 | -0.0018162 | 0.0012431  |
| Most   | Views on hateful content/total views | -14        | 0.0001738  | 0.0003613 | -0.0007440 | 0.0010916  |
| Most   | Views on hateful content/total views | -13        | -0.0005381 | 0.0005563 | -0.0019513 | 0.0008750  |
| Most   | Views on hateful content/total views | -12        | -0.0003417 | 0.0005953 | -0.0018540 | 0.0011705  |
| Most   | Views on hateful content/total views | -11        | -0.0002128 | 0.0002723 | -0.0009047 | 0.0004790  |
| Most   | Views on hateful content/total views | -10        | 0.0000792  | 0.0003296 | -0.0007581 | 0.0009165  |
| Most   | Views on hateful content/total views | -9         | 0.0006699  | 0.0003389 | -0.0001910 | 0.0015307  |
| Most   | Views on hateful content/total views | -8         | -0.0000832 | 0.0003581 | -0.0009930 | 0.0008267  |
| Most   | Views on hateful content/total views | -7         | -0.0007387 | 0.0004413 | -0.0018597 | 0.0003822  |
| Most   | Views on hateful content/total views | -6         | -0.0007236 | 0.0002868 | -0.0014522 | 0.0000050  |
| Most   | Views on hateful content/total views | -5         | 0.0006223  | 0.0005021 | -0.0006532 | 0.0018978  |
| Most   | Views on hateful content/total views | -4         | -0.0003043 | 0.0005944 | -0.0018144 | 0.0012057  |
| Most   | Views on hateful content/total views | -3         | -0.0013082 | 0.0005119 | -0.0026086 | -0.0000078 |
| Most   | Views on hateful content/total views | -2         | 0.0010927  | 0.0004831 | -0.0001345 | 0.0023200  |
| Most   | Views on hateful content/total views | -1         | 0.0005812  | 0.0005374 | -0.0007839 | 0.0019464  |
| Most   | Views on hateful content/total views | 0          | 0.0000589  | 0.0003332 | -0.0007875 | 0.0009053  |
| Most   | Views on hateful content/total views | 1          | 0.0005399  | 0.0003916 | -0.0004549 | 0.0015348  |
| Most   | Views on hateful content/total views | 2          | 0.0007514  | 0.0002419 | 0.0001368  | 0.0013660  |
| Most   | Views on hateful content/total views | 3          | 0.0007225  | 0.0004090 | -0.0003166 | 0.0017616  |
| Most   | Views on hateful content/total views | 4          | 0.0005328  | 0.0006385 | -0.0010891 | 0.0021548  |
| Most   | Views on hateful content/total views | 5          | -0.0000075 | 0.0009746 | -0.0024834 | 0.0024683  |
| Most   | Views on hateful content/total views | 6          | -0.0005384 | 0.0005654 | -0.0019748 | 0.0008981  |
| Most   | Views on hateful content/total views | 7          | 0.0004089  | 0.0006407 | -0.0012187 | 0.0020365  |

|      |                                      |    |            |           |            |           |
|------|--------------------------------------|----|------------|-----------|------------|-----------|
| Most | Views on hateful content/total views | 8  | -0.0001384 | 0.0007224 | -0.0019736 | 0.0016969 |
| Most | Views on hateful content/total views | 9  | -0.0001040 | 0.0005777 | -0.0015715 | 0.0013636 |
| Most | Views on hateful content/total views | 10 | -0.0000611 | 0.0010298 | -0.0026772 | 0.0025550 |
| Most | Views on hateful content/total views | 11 | 0.0006585  | 0.0009731 | -0.0018135 | 0.0031305 |
| Most | Views on hateful content/total views | 12 | 0.0002748  | 0.0009489 | -0.0021358 | 0.0026854 |
| Most | Views on hateful content/total views | 13 | 0.0000172  | 0.0012164 | -0.0030729 | 0.0031072 |
| Most | Views on hateful content/total views | 14 | -0.0001039 | 0.0024720 | -0.0063838 | 0.0061761 |
| Most | Views on hateful content/total views | 15 | 0.0003447  | 0.0024449 | -0.0058664 | 0.0065557 |
| Most | Views on hateful content/total views | 16 | -0.0002015 | 0.0027659 | -0.0072281 | 0.0068251 |
| Most | Views on hateful content/total views | 17 | -0.0002514 | 0.0031397 | -0.0082276 | 0.0077247 |
| Most | Views on hateful content/total views | 18 | 0.0004776  | 0.0036178 | -0.0087130 | 0.0096682 |
| Most | Views on hateful content/total views | 19 | -0.0002849 | 0.0029658 | -0.0078192 | 0.0072495 |
| Most | Views on hateful content/total views | 20 | -0.0005163 | 0.0028490 | -0.0077539 | 0.0067213 |
| Most | Views on hateful content/total views | 21 | -0.0001947 | 0.0031582 | -0.0082177 | 0.0078283 |
| Most | Views on hateful content/total views | 22 | -0.0013519 | 0.0032974 | -0.0097286 | 0.0070248 |
| Most | Views on hateful content/total views | 23 | -0.0008374 | 0.0030677 | -0.0086305 | 0.0069557 |
| Most | Views on hateful content/total views | 24 | 0.0008022  | 0.0029644 | -0.0067285 | 0.0083328 |
| Most | Views on hateful content/total views | 25 | -0.0001067 | 0.0033431 | -0.0085995 | 0.0083861 |
| Most | Views on hateful content/total views | 26 | -0.0004861 | 0.0030285 | -0.0081797 | 0.0072075 |
| Most | Views on hateful content/total views | 27 | -0.0017644 | 0.0029292 | -0.0092056 | 0.0056768 |
| Most | Views on hateful content/total views | 28 | -0.0017111 | 0.0027246 | -0.0086327 | 0.0052105 |
| Most | Views on hateful content/total views | 29 | -0.0018629 | 0.0027926 | -0.0089572 | 0.0052314 |
| Most | Views on hateful content/total views | 30 | -0.0004259 | 0.0029700 | -0.0079708 | 0.0071191 |

| sample | outcome                              | event.time | estimate   | std.error | conf.low   | conf.high  |
|--------|--------------------------------------|------------|------------|-----------|------------|------------|
| Middle | Views on hateful content/total views | -30        | -0.0002154 | 0.0002192 | -0.0007603 | 0.0003295  |
| Middle | Views on hateful content/total views | -29        | 0.0002339  | 0.0002503 | -0.0003885 | 0.0008563  |
| Middle | Views on hateful content/total views | -28        | -0.0001423 | 0.0003646 | -0.0010489 | 0.0007643  |
| Middle | Views on hateful content/total views | -27        | 0.0000774  | 0.0002615 | -0.0005729 | 0.0007276  |
| Middle | Views on hateful content/total views | -26        | 0.0001998  | 0.0002779 | -0.0004911 | 0.0008908  |
| Middle | Views on hateful content/total views | -25        | 0.0000740  | 0.0002200 | -0.0004730 | 0.0006210  |
| Middle | Views on hateful content/total views | -24        | -0.0005822 | 0.0003036 | -0.0013370 | 0.0001726  |
| Middle | Views on hateful content/total views | -23        | 0.0001852  | 0.0002516 | -0.0004403 | 0.0008107  |
| Middle | Views on hateful content/total views | -22        | -0.0005724 | 0.0002032 | -0.0010776 | -0.0000672 |
| Middle | Views on hateful content/total views | -21        | 0.0007578  | 0.0004079 | -0.0002564 | 0.0017721  |
| Middle | Views on hateful content/total views | -20        | 0.0000633  | 0.0005516 | -0.0013084 | 0.0014349  |
| Middle | Views on hateful content/total views | -19        | 0.0013521  | 0.0007337 | -0.0004721 | 0.0031764  |
| Middle | Views on hateful content/total views | -18        | 0.0007650  | 0.0004699 | -0.0004034 | 0.0019334  |
| Middle | Views on hateful content/total views | -17        | 0.0002594  | 0.0002485 | -0.0003586 | 0.0008773  |
| Middle | Views on hateful content/total views | -16        | 0.0003472  | 0.0004076 | -0.0006662 | 0.0013606  |
| Middle | Views on hateful content/total views | -15        | 0.0001514  | 0.0003799 | -0.0007932 | 0.0010960  |

|        |                                      |     |            |           |            |           |
|--------|--------------------------------------|-----|------------|-----------|------------|-----------|
| Middle | Views on hateful content/total views | -14 | 0.0000793  | 0.0002495 | -0.0005412 | 0.0006998 |
| Middle | Views on hateful content/total views | -13 | -0.0000681 | 0.0005238 | -0.0013704 | 0.0012342 |
| Middle | Views on hateful content/total views | -12 | -0.0006757 | 0.0006390 | -0.0022646 | 0.0009131 |
| Middle | Views on hateful content/total views | -11 | 0.0000933  | 0.0004680 | -0.0010702 | 0.0012569 |
| Middle | Views on hateful content/total views | -10 | -0.0001153 | 0.0004068 | -0.0011268 | 0.0008962 |
| Middle | Views on hateful content/total views | -9  | 0.0002358  | 0.0002707 | -0.0004372 | 0.0009088 |
| Middle | Views on hateful content/total views | -8  | -0.0001905 | 0.0003720 | -0.0011155 | 0.0007346 |
| Middle | Views on hateful content/total views | -7  | -0.0008100 | 0.0004523 | -0.0019345 | 0.0003146 |
| Middle | Views on hateful content/total views | -6  | -0.0008390 | 0.0003858 | -0.0017983 | 0.0001203 |
| Middle | Views on hateful content/total views | -5  | -0.0000990 | 0.0004947 | -0.0013292 | 0.0011311 |
| Middle | Views on hateful content/total views | -4  | -0.0001947 | 0.0005055 | -0.0014515 | 0.0010622 |
| Middle | Views on hateful content/total views | -3  | -0.0008612 | 0.0005824 | -0.0023092 | 0.0005869 |
| Middle | Views on hateful content/total views | -2  | 0.0006069  | 0.0005897 | -0.0008592 | 0.0020731 |
| Middle | Views on hateful content/total views | -1  | 0.0003778  | 0.0003284 | -0.0004388 | 0.0011943 |
| Middle | Views on hateful content/total views | 0   | 0.0005838  | 0.0002494 | -0.0000363 | 0.0012039 |
| Middle | Views on hateful content/total views | 1   | 0.0009885  | 0.0005750 | -0.0004412 | 0.0024183 |
| Middle | Views on hateful content/total views | 2   | 0.0009212  | 0.0005547 | -0.0004579 | 0.0023004 |
| Middle | Views on hateful content/total views | 3   | 0.0011354  | 0.0007775 | -0.0007977 | 0.0030686 |
| Middle | Views on hateful content/total views | 4   | 0.0009053  | 0.0009481 | -0.0014521 | 0.0032628 |
| Middle | Views on hateful content/total views | 5   | 0.0006444  | 0.0012424 | -0.0024447 | 0.0037335 |
| Middle | Views on hateful content/total views | 6   | 0.0009881  | 0.0010244 | -0.0015591 | 0.0035352 |
| Middle | Views on hateful content/total views | 7   | 0.0011388  | 0.0010285 | -0.0014184 | 0.0036960 |
| Middle | Views on hateful content/total views | 8   | 0.0008405  | 0.0009244 | -0.0014580 | 0.0031390 |
| Middle | Views on hateful content/total views | 9   | 0.0003947  | 0.0007994 | -0.0015931 | 0.0023825 |
| Middle | Views on hateful content/total views | 10  | 0.0008023  | 0.0015298 | -0.0030015 | 0.0046062 |
| Middle | Views on hateful content/total views | 11  | 0.0009462  | 0.0011484 | -0.0019091 | 0.0038016 |
| Middle | Views on hateful content/total views | 12  | 0.0014658  | 0.0014618 | -0.0021689 | 0.0051005 |
| Middle | Views on hateful content/total views | 13  | 0.0008423  | 0.0017937 | -0.0036176 | 0.0053022 |
| Middle | Views on hateful content/total views | 14  | 0.0015667  | 0.0031170 | -0.0061835 | 0.0093169 |
| Middle | Views on hateful content/total views | 15  | 0.0020392  | 0.0035818 | -0.0068668 | 0.0109452 |
| Middle | Views on hateful content/total views | 16  | 0.0015990  | 0.0036075 | -0.0073708 | 0.0105688 |
| Middle | Views on hateful content/total views | 17  | 0.0014520  | 0.0039503 | -0.0083700 | 0.0112741 |
| Middle | Views on hateful content/total views | 18  | 0.0022396  | 0.0043102 | -0.0084773 | 0.0129565 |
| Middle | Views on hateful content/total views | 19  | 0.0014335  | 0.0039972 | -0.0085053 | 0.0113723 |
| Middle | Views on hateful content/total views | 20  | 0.0014800  | 0.0033937 | -0.0069582 | 0.0099182 |
| Middle | Views on hateful content/total views | 21  | 0.0012123  | 0.0030993 | -0.0064940 | 0.0089185 |
| Middle | Views on hateful content/total views | 22  | 0.0010004  | 0.0036835 | -0.0081584 | 0.0101592 |
| Middle | Views on hateful content/total views | 23  | 0.0015875  | 0.0037920 | -0.0078411 | 0.0110162 |
| Middle | Views on hateful content/total views | 24  | 0.0013489  | 0.0036444 | -0.0077127 | 0.0104105 |
| Middle | Views on hateful content/total views | 25  | 0.0014597  | 0.0036191 | -0.0075389 | 0.0104583 |
| Middle | Views on hateful content/total views | 26  | 0.0013483  | 0.0040874 | -0.0088147 | 0.0115113 |

|        |                                      |    |            |           |            |           |
|--------|--------------------------------------|----|------------|-----------|------------|-----------|
| Middle | Views on hateful content/total views | 27 | -0.0006231 | 0.0048268 | -0.0126248 | 0.0113785 |
| Middle | Views on hateful content/total views | 28 | -0.0006975 | 0.0030336 | -0.0082404 | 0.0068455 |
| Middle | Views on hateful content/total views | 29 | -0.0006444 | 0.0035858 | -0.0095604 | 0.0082715 |
| Middle | Views on hateful content/total views | 30 | -0.0006505 | 0.0040539 | -0.0107302 | 0.0094292 |

| sample | outcome                              | event.time | estimate   | std.error | conf.low   | conf.high  |
|--------|--------------------------------------|------------|------------|-----------|------------|------------|
| Least  | Views on hateful content/total views | -30        | -0.0004957 | 0.0001845 | -0.0009821 | -0.0000093 |
| Least  | Views on hateful content/total views | -29        | -0.0001269 | 0.0001306 | -0.0004710 | 0.0002173  |
| Least  | Views on hateful content/total views | -28        | 0.0006112  | 0.0004690 | -0.0006250 | 0.0018473  |
| Least  | Views on hateful content/total views | -27        | -0.0001889 | 0.0003181 | -0.0010273 | 0.0006496  |
| Least  | Views on hateful content/total views | -26        | 0.0001179  | 0.0002413 | -0.0005180 | 0.0007538  |
| Least  | Views on hateful content/total views | -25        | -0.0003025 | 0.0002657 | -0.0010028 | 0.0003977  |
| Least  | Views on hateful content/total views | -24        | -0.0001412 | 0.0003063 | -0.0009486 | 0.0006662  |
| Least  | Views on hateful content/total views | -23        | 0.0004620  | 0.0002892 | -0.0003003 | 0.0012244  |
| Least  | Views on hateful content/total views | -22        | -0.0005617 | 0.0002606 | -0.0012486 | 0.0001252  |
| Least  | Views on hateful content/total views | -21        | 0.0012850  | 0.0004242 | 0.0001668  | 0.0024032  |
| Least  | Views on hateful content/total views | -20        | -0.0000098 | 0.0005736 | -0.0015217 | 0.0015021  |
| Least  | Views on hateful content/total views | -19        | 0.0016306  | 0.0006351 | -0.0000433 | 0.0033046  |
| Least  | Views on hateful content/total views | -18        | 0.0001288  | 0.0005241 | -0.0012527 | 0.0015103  |
| Least  | Views on hateful content/total views | -17        | 0.0004989  | 0.0002283 | -0.0001027 | 0.0011006  |
| Least  | Views on hateful content/total views | -16        | 0.0009043  | 0.0004368 | -0.0002470 | 0.0020557  |
| Least  | Views on hateful content/total views | -15        | -0.0005016 | 0.0002930 | -0.0012739 | 0.0002706  |
| Least  | Views on hateful content/total views | -14        | 0.0000025  | 0.0002851 | -0.0007488 | 0.0007539  |
| Least  | Views on hateful content/total views | -13        | -0.0000606 | 0.0004578 | -0.0012673 | 0.0011462  |
| Least  | Views on hateful content/total views | -12        | -0.0005515 | 0.0006916 | -0.0023744 | 0.0012714  |
| Least  | Views on hateful content/total views | -11        | 0.0001079  | 0.0003302 | -0.0007623 | 0.0009781  |
| Least  | Views on hateful content/total views | -10        | -0.0002457 | 0.0004405 | -0.0014068 | 0.0009153  |
| Least  | Views on hateful content/total views | -9         | 0.0000398  | 0.0002950 | -0.0007378 | 0.0008174  |
| Least  | Views on hateful content/total views | -8         | -0.0005390 | 0.0004032 | -0.0016017 | 0.0005236  |
| Least  | Views on hateful content/total views | -7         | -0.0001419 | 0.0003591 | -0.0010883 | 0.0008045  |
| Least  | Views on hateful content/total views | -6         | -0.0011748 | 0.0005656 | -0.0026655 | 0.0003159  |
| Least  | Views on hateful content/total views | -5         | -0.0001041 | 0.0005373 | -0.0015202 | 0.0013121  |
| Least  | Views on hateful content/total views | -4         | 0.0001543  | 0.0004112 | -0.0009295 | 0.0012381  |
| Least  | Views on hateful content/total views | -3         | -0.0007158 | 0.0006303 | -0.0023771 | 0.0009454  |
| Least  | Views on hateful content/total views | -2         | -0.0004889 | 0.0005087 | -0.0018298 | 0.0008519  |
| Least  | Views on hateful content/total views | -1         | 0.0004269  | 0.0003343 | -0.0004543 | 0.0013081  |
| Least  | Views on hateful content/total views | 0          | 0.0007722  | 0.0004224 | -0.0003411 | 0.0018855  |
| Least  | Views on hateful content/total views | 1          | 0.0011583  | 0.0006277 | -0.0004961 | 0.0028127  |
| Least  | Views on hateful content/total views | 2          | 0.0007861  | 0.0006807 | -0.0010080 | 0.0025801  |
| Least  | Views on hateful content/total views | 3          | 0.0012974  | 0.0009123 | -0.0011073 | 0.0037021  |
| Least  | Views on hateful content/total views | 4          | 0.0010874  | 0.0010918 | -0.0017902 | 0.0039649  |

|       |                                      |    |            |           |            |           |
|-------|--------------------------------------|----|------------|-----------|------------|-----------|
| Least | Views on hateful content/total views | 5  | 0.0009810  | 0.0015063 | -0.0029891 | 0.0049512 |
| Least | Views on hateful content/total views | 6  | 0.0011879  | 0.0012880 | -0.0022071 | 0.0045828 |
| Least | Views on hateful content/total views | 7  | 0.0012025  | 0.0011894 | -0.0019325 | 0.0043374 |
| Least | Views on hateful content/total views | 8  | 0.0008318  | 0.0009982 | -0.0017991 | 0.0034626 |
| Least | Views on hateful content/total views | 9  | 0.0004052  | 0.0009614 | -0.0021288 | 0.0029393 |
| Least | Views on hateful content/total views | 10 | 0.0011585  | 0.0017049 | -0.0033350 | 0.0056520 |
| Least | Views on hateful content/total views | 11 | 0.0015023  | 0.0015492 | -0.0025809 | 0.0055854 |
| Least | Views on hateful content/total views | 12 | 0.0010967  | 0.0014620 | -0.0027566 | 0.0049500 |
| Least | Views on hateful content/total views | 13 | 0.0002234  | 0.0017158 | -0.0042990 | 0.0047457 |
| Least | Views on hateful content/total views | 14 | 0.0009470  | 0.0029650 | -0.0068678 | 0.0087618 |
| Least | Views on hateful content/total views | 15 | 0.0010557  | 0.0030589 | -0.0070066 | 0.0091181 |
| Least | Views on hateful content/total views | 16 | 0.0008019  | 0.0030159 | -0.0071472 | 0.0087509 |
| Least | Views on hateful content/total views | 17 | 0.0011177  | 0.0034599 | -0.0080016 | 0.0102370 |
| Least | Views on hateful content/total views | 18 | 0.0014067  | 0.0039264 | -0.0089422 | 0.0117555 |
| Least | Views on hateful content/total views | 19 | 0.0009380  | 0.0034600 | -0.0081816 | 0.0100577 |
| Least | Views on hateful content/total views | 20 | 0.0004143  | 0.0029515 | -0.0073651 | 0.0081936 |
| Least | Views on hateful content/total views | 21 | 0.0005872  | 0.0029539 | -0.0071984 | 0.0083728 |
| Least | Views on hateful content/total views | 22 | 0.0005506  | 0.0034775 | -0.0086149 | 0.0097162 |
| Least | Views on hateful content/total views | 23 | 0.0011553  | 0.0038076 | -0.0088804 | 0.0111910 |
| Least | Views on hateful content/total views | 24 | 0.0015025  | 0.0034213 | -0.0075150 | 0.0105201 |
| Least | Views on hateful content/total views | 25 | 0.0004547  | 0.0030784 | -0.0076591 | 0.0085685 |
| Least | Views on hateful content/total views | 26 | 0.0002358  | 0.0029817 | -0.0076231 | 0.0080946 |
| Least | Views on hateful content/total views | 27 | -0.0026704 | 0.0027676 | -0.0099649 | 0.0046242 |
| Least | Views on hateful content/total views | 28 | -0.0022497 | 0.0033026 | -0.0109544 | 0.0064550 |
| Least | Views on hateful content/total views | 29 | -0.0032297 | 0.0023041 | -0.0093026 | 0.0028432 |
| Least | Views on hateful content/total views | 30 | -0.0029588 | 0.0020974 | -0.0084869 | 0.0025693 |

Views on non...organization content that is hateful  
Average effect by length of exposure (Callaway and Sant'Anna)

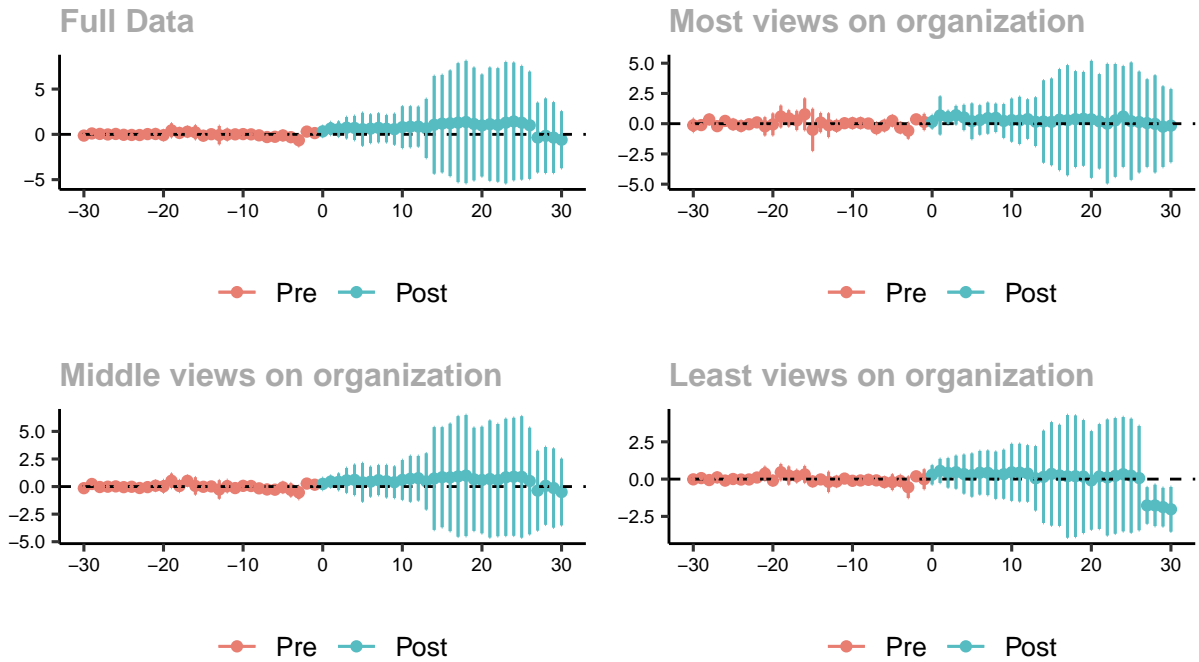

Long timeframe with sampled control groups

| sample | outcome                                          | event.time | estimate   | std.error | conf.low   | conf.high |
|--------|--------------------------------------------------|------------|------------|-----------|------------|-----------|
| Full   | Views on nonorganization content that is hateful | -30        | -0.1368013 | 0.1127407 | -0.4232723 | 0.1496697 |
| Full   | Views on nonorganization content that is hateful | -29        | 0.0996605  | 0.0420512 | -0.0071905 | 0.2065115 |
| Full   | Views on nonorganization content that is hateful | -28        | 0.0491642  | 0.0638796 | -0.1131521 | 0.2114805 |
| Full   | Views on nonorganization content that is hateful | -27        | -0.0110696 | 0.0556182 | -0.1523940 | 0.1302547 |
| Full   | Views on nonorganization content that is hateful | -26        | 0.0463409  | 0.0864785 | -0.1733986 | 0.2660805 |
| Full   | Views on nonorganization content that is hateful | -25        | -0.0497420 | 0.1025122 | -0.3102228 | 0.2107388 |
| Full   | Views on nonorganization content that is hateful | -24        | -0.0670933 | 0.0594352 | -0.2181165 | 0.0839299 |
| Full   | Views on nonorganization content that is hateful | -23        | -0.0753114 | 0.0478822 | -0.1969788 | 0.0463560 |
| Full   | Views on nonorganization content that is hateful | -22        | 0.0268807  | 0.0786983 | -0.1730897 | 0.2268510 |
| Full   | Views on nonorganization content that is hateful | -21        | 0.0421100  | 0.2036506 | -0.4753608 | 0.5595808 |
| Full   | Views on nonorganization content that is hateful | -20        | -0.0902887 | 0.2177278 | -0.6435292 | 0.4629518 |
| Full   | Views on nonorganization content that is hateful | -19        | 0.4415628  | 0.3001775 | -0.3211803 | 1.2043058 |
| Full   | Views on nonorganization content that is hateful | -18        | 0.1568962  | 0.2070317 | -0.3691659 | 0.6829583 |
| Full   | Views on nonorganization content that is hateful | -17        | 0.2886360  | 0.2162509 | -0.2608519 | 0.8381238 |
| Full   | Views on nonorganization content that is hateful | -16        | 0.2257722  | 0.3011985 | -0.5395651 | 0.9911095 |
| Full   | Views on nonorganization content that is hateful | -15        | -0.1482529 | 0.1962037 | -0.6468013 | 0.3502955 |
| Full   | Views on nonorganization content that is hateful | -14        | 0.0160463  | 0.0811834 | -0.1902386 | 0.2223311 |
| Full   | Views on nonorganization content that is hateful | -13        | -0.0793737 | 0.3961540 | -1.0859904 | 0.9272430 |
| Full   | Views on nonorganization content that is hateful | -12        | -0.0209065 | 0.2508601 | -0.6583353 | 0.6165222 |

|      |                                                  |     |            |           |            |           |
|------|--------------------------------------------------|-----|------------|-----------|------------|-----------|
| Full | Views on nonorganization content that is hateful | -11 | 0.0004246  | 0.1281623 | -0.3252325 | 0.3260816 |
| Full | Views on nonorganization content that is hateful | -10 | 0.0289888  | 0.1565311 | -0.3687526 | 0.4267302 |
| Full | Views on nonorganization content that is hateful | -9  | 0.0015560  | 0.0580859 | -0.1460387 | 0.1491507 |
| Full | Views on nonorganization content that is hateful | -8  | -0.1071805 | 0.0904873 | -0.3371063 | 0.1227453 |
| Full | Views on nonorganization content that is hateful | -7  | -0.2944566 | 0.1452534 | -0.6635415 | 0.0746284 |
| Full | Views on nonorganization content that is hateful | -6  | -0.2662268 | 0.1253164 | -0.5846523 | 0.0521987 |
| Full | Views on nonorganization content that is hateful | -5  | -0.1191918 | 0.2110431 | -0.6554467 | 0.4170631 |
| Full | Views on nonorganization content that is hateful | -4  | -0.3086458 | 0.2045277 | -0.8283452 | 0.2110537 |
| Full | Views on nonorganization content that is hateful | -3  | -0.6512990 | 0.2583300 | -1.3077086 | 0.0051106 |
| Full | Views on nonorganization content that is hateful | -2  | 0.3047755  | 0.0895023 | 0.0773526  | 0.5321984 |
| Full | Views on nonorganization content that is hateful | -1  | 0.1388601  | 0.1517495 | -0.2467313 | 0.5244514 |
| Full | Views on nonorganization content that is hateful | 0   | 0.3281120  | 0.2356267 | -0.2706092 | 0.9268333 |
| Full | Views on nonorganization content that is hateful | 1   | 0.6453049  | 0.2777486 | -0.0604469 | 1.3510567 |
| Full | Views on nonorganization content that is hateful | 2   | 0.5803866  | 0.3305927 | -0.2596407 | 1.4204139 |
| Full | Views on nonorganization content that is hateful | 3   | 0.7378207  | 0.4622795 | -0.4368191 | 1.9124606 |
| Full | Views on nonorganization content that is hateful | 4   | 0.7054097  | 0.5245446 | -0.6274442 | 2.0382637 |
| Full | Views on nonorganization content that is hateful | 5   | 0.5687543  | 0.7112497 | -1.2385122 | 2.3760208 |
| Full | Views on nonorganization content that is hateful | 6   | 0.6291479  | 0.6180477 | -0.9412949 | 2.1995907 |
| Full | Views on nonorganization content that is hateful | 7   | 0.7220098  | 0.6267548 | -0.8705574 | 2.3145770 |
| Full | Views on nonorganization content that is hateful | 8   | 0.6228803  | 0.5885312 | -0.8725618 | 2.1183225 |
| Full | Views on nonorganization content that is hateful | 9   | 0.5709800  | 0.6682409 | -1.1270022 | 2.2689623 |
| Full | Views on nonorganization content that is hateful | 10  | 0.7948332  | 0.9032289 | -1.5002473 | 3.0899137 |
| Full | Views on nonorganization content that is hateful | 11  | 0.8395056  | 0.8874403 | -1.4154565 | 3.0944677 |
| Full | Views on nonorganization content that is hateful | 12  | 0.8594319  | 0.8651583 | -1.3389123 | 3.0577761 |
| Full | Views on nonorganization content that is hateful | 13  | 0.6524903  | 1.2828580 | -2.6072175 | 3.9121981 |
| Full | Views on nonorganization content that is hateful | 14  | 1.0609339  | 2.1216798 | -4.3301978 | 6.4520656 |
| Full | Views on nonorganization content that is hateful | 15  | 1.1853000  | 2.1163703 | -4.1923404 | 6.5629404 |
| Full | Views on nonorganization content that is hateful | 16  | 1.2219468  | 2.2931972 | -4.6050061 | 7.0488996 |
| Full | Views on nonorganization content that is hateful | 17  | 1.2915406  | 2.5823567 | -5.2701588 | 7.8532400 |
| Full | Views on nonorganization content that is hateful | 18  | 1.3641489  | 2.6560462 | -5.3847936 | 8.1130914 |
| Full | Views on nonorganization content that is hateful | 19  | 1.1456690  | 2.4480502 | -5.0747613 | 7.3660993 |
| Full | Views on nonorganization content that is hateful | 20  | 0.9815924  | 2.2133387 | -4.6424421 | 6.6056269 |
| Full | Views on nonorganization content that is hateful | 21  | 1.1247623  | 2.4580006 | -5.1209516 | 7.3704763 |
| Full | Views on nonorganization content that is hateful | 22  | 1.0414546  | 2.4635688 | -5.2184079 | 7.3013170 |
| Full | Views on nonorganization content that is hateful | 23  | 1.2897772  | 2.6346106 | -5.4046979 | 7.9842524 |
| Full | Views on nonorganization content that is hateful | 24  | 1.4261540  | 2.5548809 | -5.0657302 | 7.9180382 |
| Full | Views on nonorganization content that is hateful | 25  | 1.2838520  | 2.4657212 | -4.9814799 | 7.5491838 |
| Full | Views on nonorganization content that is hateful | 26  | 1.0012413  | 2.3282966 | -4.9148982 | 6.9173809 |
| Full | Views on nonorganization content that is hateful | 27  | -0.3531270 | 1.5120232 | -4.1951376 | 3.4888837 |
| Full | Views on nonorganization content that is hateful | 28  | -0.1562369 | 1.6155508 | -4.2613083 | 3.9488344 |
| Full | Views on nonorganization content that is hateful | 29  | -0.3571249 | 1.5338220 | -4.2545256 | 3.5402757 |



|      |                                                  |    |            |           |            |           |
|------|--------------------------------------------------|----|------------|-----------|------------|-----------|
| Full | Views on nonorganization content that is hateful | 30 | -0.5971643 | 1.2336759 | -3.7319017 | 2.5375731 |
|------|--------------------------------------------------|----|------------|-----------|------------|-----------|

| sample | outcome                                          | event.time | estimate   | std.error | conf.low   | conf.high |
|--------|--------------------------------------------------|------------|------------|-----------|------------|-----------|
| Most   | Views on nonorganization content that is hateful | -30        | -0.1329868 | 0.2084557 | -0.6719859 | 0.4060122 |
| Most   | Views on nonorganization content that is hateful | -29        | -0.1167159 | 0.0567958 | -0.2635713 | 0.0301395 |
| Most   | Views on nonorganization content that is hateful | -28        | 0.3507185  | 0.1516617 | -0.0414295 | 0.7428666 |
| Most   | Views on nonorganization content that is hateful | -27        | -0.2050320 | 0.1254172 | -0.5293202 | 0.1192563 |
| Most   | Views on nonorganization content that is hateful | -26        | 0.2280637  | 0.0993726 | -0.0288817 | 0.4850092 |
| Most   | Views on nonorganization content that is hateful | -25        | -0.0587840 | 0.1669108 | -0.4903613 | 0.3727933 |
| Most   | Views on nonorganization content that is hateful | -24        | -0.1883830 | 0.1657982 | -0.6170834 | 0.2403174 |
| Most   | Views on nonorganization content that is hateful | -23        | -0.0445463 | 0.0842178 | -0.2623064 | 0.1732138 |
| Most   | Views on nonorganization content that is hateful | -22        | 0.1057343  | 0.0903264 | -0.1278205 | 0.3392892 |
| Most   | Views on nonorganization content that is hateful | -21        | -0.2191514 | 0.2899441 | -0.9688530 | 0.5305503 |
| Most   | Views on nonorganization content that is hateful | -20        | -0.0589928 | 0.3479434 | -0.9586619 | 0.8406763 |
| Most   | Views on nonorganization content that is hateful | -19        | 0.5915535  | 0.3470693 | -0.3058555 | 1.4889625 |
| Most   | Views on nonorganization content that is hateful | -18        | 0.4404884  | 0.2584833 | -0.2278657 | 1.1088426 |
| Most   | Views on nonorganization content that is hateful | -17        | 0.2694016  | 0.3061055 | -0.5220882 | 1.0608914 |
| Most   | Views on nonorganization content that is hateful | -16        | 0.7743452  | 0.5058842 | -0.5337078 | 2.0823982 |
| Most   | Views on nonorganization content that is hateful | -15        | -0.5061720 | 0.6706896 | -2.2403583 | 1.2280143 |
| Most   | Views on nonorganization content that is hateful | -14        | 0.0941421  | 0.3040536 | -0.6920421 | 0.8803262 |
| Most   | Views on nonorganization content that is hateful | -13        | -0.1279382 | 0.3768956 | -1.1024684 | 0.8465920 |
| Most   | Views on nonorganization content that is hateful | -12        | -0.1725431 | 0.1855330 | -0.6522713 | 0.3071851 |
| Most   | Views on nonorganization content that is hateful | -11        | 0.0393975  | 0.1344097 | -0.3081425 | 0.3869374 |
| Most   | Views on nonorganization content that is hateful | -10        | 0.0479369  | 0.1633496 | -0.3744322 | 0.4703061 |
| Most   | Views on nonorganization content that is hateful | -9         | 0.0542722  | 0.1642256 | -0.3703621 | 0.4789064 |
| Most   | Views on nonorganization content that is hateful | -8         | 0.0141978  | 0.1182240 | -0.2914911 | 0.3198868 |
| Most   | Views on nonorganization content that is hateful | -7         | -0.3772058 | 0.1825200 | -0.8491435 | 0.0947319 |
| Most   | Views on nonorganization content that is hateful | -6         | -0.1518922 | 0.1810742 | -0.6200915 | 0.3163070 |
| Most   | Views on nonorganization content that is hateful | -5         | 0.2421932  | 0.1728182 | -0.2046587 | 0.6890451 |
| Most   | Views on nonorganization content that is hateful | -4         | -0.3325710 | 0.1694293 | -0.7706603 | 0.1055184 |
| Most   | Views on nonorganization content that is hateful | -3         | -0.5789446 | 0.2547948 | -1.2377615 | 0.0798723 |
| Most   | Views on nonorganization content that is hateful | -2         | 0.3600380  | 0.1166887 | 0.0583187  | 0.6617572 |
| Most   | Views on nonorganization content that is hateful | -1         | 0.1446676  | 0.2561998 | -0.5177823 | 0.8071175 |
| Most   | Views on nonorganization content that is hateful | 0          | 0.1552602  | 0.2144906 | -0.3993432 | 0.7098636 |
| Most   | Views on nonorganization content that is hateful | 1          | 0.6800633  | 0.6072512 | -0.8900919 | 2.2502184 |
| Most   | Views on nonorganization content that is hateful | 2          | 0.5120349  | 0.2158266 | -0.0460229 | 1.0700928 |
| Most   | Views on nonorganization content that is hateful | 3          | 0.7012034  | 0.2963783 | -0.0651349 | 1.4675417 |
| Most   | Views on nonorganization content that is hateful | 4          | 0.5136892  | 0.4024382 | -0.5268859 | 1.5542643 |
| Most   | Views on nonorganization content that is hateful | 5          | 0.1982461  | 0.5688138 | -1.2725225 | 1.6690146 |
| Most   | Views on nonorganization content that is hateful | 6          | 0.3060592  | 0.4694385 | -0.9077568 | 1.5198753 |
| Most   | Views on nonorganization content that is hateful | 7          | 0.4590890  | 0.4946751 | -0.8199807 | 1.7381586 |

|      |                                                  |    |            |           |            |           |
|------|--------------------------------------------------|----|------------|-----------|------------|-----------|
| Most | Views on nonorganization content that is hateful | 8  | 0.4818897  | 0.4514241 | -0.6853469 | 1.6491263 |
| Most | Views on nonorganization content that is hateful | 9  | 0.2257626  | 0.5382349 | -1.1659387 | 1.6174638 |
| Most | Views on nonorganization content that is hateful | 10 | 0.2939964  | 0.6849467 | -1.4770541 | 2.0650470 |
| Most | Views on nonorganization content that is hateful | 11 | 0.2710432  | 0.7525306 | -1.6747573 | 2.2168437 |
| Most | Views on nonorganization content that is hateful | 12 | 0.3792710  | 0.6280074 | -1.2445528 | 2.0030949 |
| Most | Views on nonorganization content that is hateful | 13 | 0.1606355  | 0.7755518 | -1.8446904 | 2.1659614 |
| Most | Views on nonorganization content that is hateful | 14 | 0.1822092  | 1.3115221 | -3.2089627 | 3.5733811 |
| Most | Views on nonorganization content that is hateful | 15 | 0.1478798  | 1.3830817 | -3.4283220 | 3.7240817 |
| Most | Views on nonorganization content that is hateful | 16 | 0.3332364  | 1.6118573 | -3.8345051 | 4.5009778 |
| Most | Views on nonorganization content that is hateful | 17 | 0.2848870  | 1.7568783 | -4.2578320 | 4.8276059 |
| Most | Views on nonorganization content that is hateful | 18 | 0.3747267  | 1.5289242 | -3.5785766 | 4.3280301 |
| Most | Views on nonorganization content that is hateful | 19 | 0.4072208  | 1.4966667 | -3.4626749 | 4.2771166 |
| Most | Views on nonorganization content that is hateful | 20 | 0.3645688  | 1.8669942 | -4.4628742 | 5.1920118 |
| Most | Views on nonorganization content that is hateful | 21 | 0.1954683  | 1.5063877 | -3.6995630 | 4.0904996 |
| Most | Views on nonorganization content that is hateful | 22 | 0.0049046  | 1.9080069 | -4.9285840 | 4.9383932 |
| Most | Views on nonorganization content that is hateful | 23 | 0.2731335  | 1.8022449 | -4.3868888 | 4.9331558 |
| Most | Views on nonorganization content that is hateful | 24 | 0.5940098  | 1.6090667 | -3.5665162 | 4.7545358 |
| Most | Views on nonorganization content that is hateful | 25 | 0.2065036  | 1.8739618 | -4.6389552 | 5.0519624 |
| Most | Views on nonorganization content that is hateful | 26 | 0.1376660  | 1.6089245 | -4.0224921 | 4.2978241 |
| Most | Views on nonorganization content that is hateful | 27 | 0.0489858  | 1.3987990 | -3.5678559 | 3.6658275 |
| Most | Views on nonorganization content that is hateful | 28 | -0.0157535 | 1.5489783 | -4.0209102 | 3.9894033 |
| Most | Views on nonorganization content that is hateful | 29 | -0.2482916 | 1.2868481 | -3.5756645 | 3.0790813 |
| Most | Views on nonorganization content that is hateful | 30 | -0.1619871 | 1.1655847 | -3.1758121 | 2.8518380 |

| sample | outcome                                          | event.time | estimate   | std.error | conf.low   | conf.high  |
|--------|--------------------------------------------------|------------|------------|-----------|------------|------------|
| Middle | Views on nonorganization content that is hateful | -30        | -0.1475377 | 0.1109559 | -0.4297490 | 0.1346736  |
| Middle | Views on nonorganization content that is hateful | -29        | 0.2333778  | 0.0420269 | 0.1264843  | 0.3402712  |
| Middle | Views on nonorganization content that is hateful | -28        | -0.0399658 | 0.0828631 | -0.2507243 | 0.1707927  |
| Middle | Views on nonorganization content that is hateful | -27        | -0.0101336 | 0.0718722 | -0.1929373 | 0.1726702  |
| Middle | Views on nonorganization content that is hateful | -26        | 0.0179485  | 0.0870961 | -0.2035764 | 0.2394735  |
| Middle | Views on nonorganization content that is hateful | -25        | -0.0532235 | 0.1066183 | -0.3244024 | 0.2179554  |
| Middle | Views on nonorganization content that is hateful | -24        | -0.0182858 | 0.0679272 | -0.1910557 | 0.1544841  |
| Middle | Views on nonorganization content that is hateful | -23        | -0.1297985 | 0.0492353 | -0.2550262 | -0.0045708 |
| Middle | Views on nonorganization content that is hateful | -22        | -0.0506312 | 0.0908485 | -0.2817003 | 0.1804380  |
| Middle | Views on nonorganization content that is hateful | -21        | 0.0770366  | 0.1814232 | -0.3844051 | 0.5384783  |
| Middle | Views on nonorganization content that is hateful | -20        | 0.0248391  | 0.2196523 | -0.5338367 | 0.5835149  |
| Middle | Views on nonorganization content that is hateful | -19        | 0.5275706  | 0.2520973 | -0.1136277 | 1.1687689  |
| Middle | Views on nonorganization content that is hateful | -18        | 0.0516400  | 0.2056769 | -0.4714901 | 0.5747700  |
| Middle | Views on nonorganization content that is hateful | -17        | 0.5171435  | 0.1808180 | 0.0572409  | 0.9770461  |
| Middle | Views on nonorganization content that is hateful | -16        | 0.0603252  | 0.3038849 | -0.7125925 | 0.8332430  |
| Middle | Views on nonorganization content that is hateful | -15        | -0.0200755 | 0.1195904 | -0.3242484 | 0.2840974  |

|        |                                                  |     |            |           |            |           |
|--------|--------------------------------------------------|-----|------------|-----------|------------|-----------|
| Middle | Views on nonorganization content that is hateful | -14 | 0.0123148  | 0.0906336 | -0.2182078 | 0.2428374 |
| Middle | Views on nonorganization content that is hateful | -13 | -0.2628014 | 0.3258414 | -1.0915646 | 0.5659618 |
| Middle | Views on nonorganization content that is hateful | -12 | 0.0404527  | 0.2196421 | -0.5181971 | 0.5991025 |
| Middle | Views on nonorganization content that is hateful | -11 | -0.1379486 | 0.1408647 | -0.4962318 | 0.2203346 |
| Middle | Views on nonorganization content that is hateful | -10 | 0.0629276  | 0.1644099 | -0.3552417 | 0.4810969 |
| Middle | Views on nonorganization content that is hateful | -9  | 0.0505991  | 0.0684859 | -0.1235919 | 0.2247900 |
| Middle | Views on nonorganization content that is hateful | -8  | -0.1611536 | 0.1123564 | -0.4469271 | 0.1246198 |
| Middle | Views on nonorganization content that is hateful | -7  | -0.2601859 | 0.1574949 | -0.6607671 | 0.1403952 |
| Middle | Views on nonorganization content that is hateful | -6  | -0.2819594 | 0.1473424 | -0.6567183 | 0.0927995 |
| Middle | Views on nonorganization content that is hateful | -5  | -0.0746925 | 0.1906844 | -0.5596897 | 0.4103047 |
| Middle | Views on nonorganization content that is hateful | -4  | -0.3038959 | 0.2366365 | -0.9057701 | 0.2979784 |
| Middle | Views on nonorganization content that is hateful | -3  | -0.5360246 | 0.2347253 | -1.1330379 | 0.0609886 |
| Middle | Views on nonorganization content that is hateful | -2  | 0.2712117  | 0.0807751 | 0.0657637  | 0.4766597 |
| Middle | Views on nonorganization content that is hateful | -1  | 0.1704004  | 0.1481535 | -0.2064215 | 0.5472222 |
| Middle | Views on nonorganization content that is hateful | 0   | 0.2396460  | 0.2112927 | -0.2977677 | 0.7770596 |
| Middle | Views on nonorganization content that is hateful | 1   | 0.4489066  | 0.2070265 | -0.0776560 | 0.9754691 |
| Middle | Views on nonorganization content that is hateful | 2   | 0.4296075  | 0.2951722 | -0.3211499 | 1.1803649 |
| Middle | Views on nonorganization content that is hateful | 3   | 0.5641591  | 0.4401667 | -0.5553853 | 1.6837035 |
| Middle | Views on nonorganization content that is hateful | 4   | 0.6086777  | 0.5390093 | -0.7622685 | 1.9796240 |
| Middle | Views on nonorganization content that is hateful | 5   | 0.3842555  | 0.6852172 | -1.3585638 | 2.1270748 |
| Middle | Views on nonorganization content that is hateful | 6   | 0.4441644  | 0.5295246 | -0.9026578 | 1.7909865 |
| Middle | Views on nonorganization content that is hateful | 7   | 0.5840610  | 0.5317626 | -0.7684535 | 1.9365756 |
| Middle | Views on nonorganization content that is hateful | 8   | 0.4849032  | 0.5750820 | -0.9777923 | 1.9475988 |
| Middle | Views on nonorganization content that is hateful | 9   | 0.3930701  | 0.5601057 | -1.0315338 | 1.8176741 |
| Middle | Views on nonorganization content that is hateful | 10  | 0.6050713  | 0.7064541 | -1.1917632 | 2.4019059 |
| Middle | Views on nonorganization content that is hateful | 11  | 0.7061871  | 0.8149021 | -1.3664800 | 2.7788542 |
| Middle | Views on nonorganization content that is hateful | 12  | 0.7594794  | 0.7924808 | -1.2561603 | 2.7751190 |
| Middle | Views on nonorganization content that is hateful | 13  | 0.4677287  | 0.9983816 | -2.0716104 | 3.0070678 |
| Middle | Views on nonorganization content that is hateful | 14  | 0.7318661  | 1.8290554 | -3.9202548 | 5.3839870 |
| Middle | Views on nonorganization content that is hateful | 15  | 0.8468000  | 1.7816078 | -3.6846399 | 5.3782399 |
| Middle | Views on nonorganization content that is hateful | 16  | 0.8300915  | 1.9148517 | -4.0402484 | 5.7004314 |
| Middle | Views on nonorganization content that is hateful | 17  | 0.9195231  | 2.1453258 | -4.5370176 | 6.3760637 |
| Middle | Views on nonorganization content that is hateful | 18  | 0.9967497  | 2.1558957 | -4.4866750 | 6.4801744 |
| Middle | Views on nonorganization content that is hateful | 19  | 0.6603273  | 1.8368479 | -4.0116135 | 5.3322681 |
| Middle | Views on nonorganization content that is hateful | 20  | 0.5956069  | 1.8979183 | -4.2316637 | 5.4228775 |
| Middle | Views on nonorganization content that is hateful | 21  | 0.6844012  | 2.0823967 | -4.6120819 | 5.9808842 |
| Middle | Views on nonorganization content that is hateful | 22  | 0.5860854  | 1.9989179 | -4.4980732 | 5.6702441 |
| Middle | Views on nonorganization content that is hateful | 23  | 0.8396041  | 2.0847222 | -4.4627938 | 6.1420020 |
| Middle | Views on nonorganization content that is hateful | 24  | 0.8904149  | 2.0985733 | -4.4472127 | 6.2280425 |
| Middle | Views on nonorganization content that is hateful | 25  | 0.8750035  | 2.1593428 | -4.6171887 | 6.3671957 |
| Middle | Views on nonorganization content that is hateful | 26  | 0.5031085  | 1.8971718 | -4.3222634 | 5.3284803 |

|        |                                                  |    |            |           |            |           |
|--------|--------------------------------------------------|----|------------|-----------|------------|-----------|
| Middle | Views on nonorganization content that is hateful | 27 | -0.3673139 | 1.4186739 | -3.9756478 | 3.2410200 |
| Middle | Views on nonorganization content that is hateful | 28 | 0.0687846  | 1.3831692 | -3.4492446 | 3.5868139 |
| Middle | Views on nonorganization content that is hateful | 29 | -0.1327436 | 1.4055627 | -3.7077298 | 3.4422426 |
| Middle | Views on nonorganization content that is hateful | 30 | -0.4941514 | 1.1846465 | -3.5072470 | 2.5189441 |

| sample | outcome                                          | event.time | estimate   | std.error | conf.low   | conf.high |
|--------|--------------------------------------------------|------------|------------|-----------|------------|-----------|
| Least  | Views on nonorganization content that is hateful | -30        | -0.0163019 | 0.0954733 | -0.2667615 | 0.2341577 |
| Least  | Views on nonorganization content that is hateful | -29        | 0.0683391  | 0.0572021 | -0.0817220 | 0.2184002 |
| Least  | Views on nonorganization content that is hateful | -28        | -0.0631227 | 0.0878593 | -0.2936082 | 0.1673628 |
| Least  | Views on nonorganization content that is hateful | -27        | 0.1171065  | 0.1260115 | -0.2134657 | 0.4476786 |
| Least  | Views on nonorganization content that is hateful | -26        | -0.0990748 | 0.1079120 | -0.3821656 | 0.1840160 |
| Least  | Views on nonorganization content that is hateful | -25        | 0.0074552  | 0.0896105 | -0.2276244 | 0.2425349 |
| Least  | Views on nonorganization content that is hateful | -24        | -0.0294869 | 0.0785997 | -0.2356814 | 0.1767076 |
| Least  | Views on nonorganization content that is hateful | -23        | -0.0228799 | 0.0461011 | -0.1438191 | 0.0980593 |
| Least  | Views on nonorganization content that is hateful | -22        | 0.1074203  | 0.0724278 | -0.0825832 | 0.2974237 |
| Least  | Views on nonorganization content that is hateful | -21        | 0.3722235  | 0.1744306 | -0.0853688 | 0.8298158 |
| Least  | Views on nonorganization content that is hateful | -20        | -0.0987267 | 0.1234757 | -0.4226465 | 0.2251931 |
| Least  | Views on nonorganization content that is hateful | -19        | 0.4639484  | 0.2061863 | -0.0769502 | 1.0048470 |
| Least  | Views on nonorganization content that is hateful | -18        | 0.2388854  | 0.2301525 | -0.3648847 | 0.8426555 |
| Least  | Views on nonorganization content that is hateful | -17        | 0.2029513  | 0.1605880 | -0.2183270 | 0.6242296 |
| Least  | Views on nonorganization content that is hateful | -16        | 0.3154414  | 0.2118166 | -0.2402273 | 0.8711100 |
| Least  | Views on nonorganization content that is hateful | -15        | -0.1539584 | 0.1221628 | -0.4744339 | 0.1665172 |
| Least  | Views on nonorganization content that is hateful | -14        | -0.0212942 | 0.0564020 | -0.1692564 | 0.1266680 |
| Least  | Views on nonorganization content that is hateful | -13        | -0.1868938 | 0.2574792 | -0.8623514 | 0.4885639 |
| Least  | Views on nonorganization content that is hateful | -12        | -0.1597148 | 0.1349996 | -0.5138659 | 0.1944362 |
| Least  | Views on nonorganization content that is hateful | -11        | 0.0353593  | 0.0865651 | -0.1917312 | 0.2624498 |
| Least  | Views on nonorganization content that is hateful | -10        | -0.1121691 | 0.1044568 | -0.3861957 | 0.1618575 |
| Least  | Views on nonorganization content that is hateful | -9         | -0.0901325 | 0.0918399 | -0.3310606 | 0.1507957 |
| Least  | Views on nonorganization content that is hateful | -8         | -0.0471133 | 0.1166615 | -0.3531571 | 0.2589305 |
| Least  | Views on nonorganization content that is hateful | -7         | -0.0845889 | 0.0878756 | -0.3151172 | 0.1459394 |
| Least  | Views on nonorganization content that is hateful | -6         | -0.2006891 | 0.1321901 | -0.5474698 | 0.1460917 |
| Least  | Views on nonorganization content that is hateful | -5         | -0.2039879 | 0.1978317 | -0.7229694 | 0.3149935 |
| Least  | Views on nonorganization content that is hateful | -4         | -0.1213715 | 0.1495249 | -0.5136273 | 0.2708843 |
| Least  | Views on nonorganization content that is hateful | -3         | -0.5432081 | 0.2728512 | -1.2589919 | 0.1725757 |
| Least  | Views on nonorganization content that is hateful | -2         | 0.1885180  | 0.0754022 | -0.0092884 | 0.3863243 |
| Least  | Views on nonorganization content that is hateful | -1         | -0.0067072 | 0.2519400 | -0.6676336 | 0.6542193 |
| Least  | Views on nonorganization content that is hateful | 0          | 0.2876355  | 0.2444438 | -0.3536258 | 0.9288969 |
| Least  | Views on nonorganization content that is hateful | 1          | 0.5534117  | 0.3064164 | -0.2504252 | 1.3572486 |
| Least  | Views on nonorganization content that is hateful | 2          | 0.4193252  | 0.3752193 | -0.5650056 | 1.4036560 |
| Least  | Views on nonorganization content that is hateful | 3          | 0.4654507  | 0.4206150 | -0.6379690 | 1.5688704 |
| Least  | Views on nonorganization content that is hateful | 4          | 0.3367966  | 0.4967445 | -0.9663373 | 1.6399306 |

|       |                                                  |    |            |           |            |            |
|-------|--------------------------------------------------|----|------------|-----------|------------|------------|
| Least | Views on nonorganization content that is hateful | 5  | 0.2709040  | 0.5505789 | -1.1734563 | 1.7152644  |
| Least | Views on nonorganization content that is hateful | 6  | 0.4289367  | 0.5568152 | -1.0317836 | 1.8896570  |
| Least | Views on nonorganization content that is hateful | 7  | 0.4193741  | 0.5688017 | -1.0727909 | 1.9115392  |
| Least | Views on nonorganization content that is hateful | 8  | 0.2601056  | 0.6019520 | -1.3190242 | 1.8392354  |
| Least | Views on nonorganization content that is hateful | 9  | 0.3288797  | 0.6231463 | -1.3058502 | 1.9636096  |
| Least | Views on nonorganization content that is hateful | 10 | 0.4568521  | 0.7257441 | -1.4470274 | 2.3607315  |
| Least | Views on nonorganization content that is hateful | 11 | 0.4377436  | 0.7350607 | -1.4905766 | 2.3660638  |
| Least | Views on nonorganization content that is hateful | 12 | 0.3792407  | 0.7184475 | -1.5054974 | 2.2639787  |
| Least | Views on nonorganization content that is hateful | 13 | 0.0553515  | 0.8194697 | -2.0944031 | 2.2051060  |
| Least | Views on nonorganization content that is hateful | 14 | 0.1496976  | 1.1789982 | -2.9432252 | 3.2426204  |
| Least | Views on nonorganization content that is hateful | 15 | 0.3506055  | 1.3184080 | -3.1080378 | 3.8092488  |
| Least | Views on nonorganization content that is hateful | 16 | 0.2533427  | 1.2906286 | -3.1324256 | 3.6391109  |
| Least | Views on nonorganization content that is hateful | 17 | 0.1891323  | 1.5646967 | -3.9156122 | 4.2938768  |
| Least | Views on nonorganization content that is hateful | 18 | 0.1934342  | 1.5495117 | -3.8714748 | 4.2583432  |
| Least | Views on nonorganization content that is hateful | 19 | 0.1712336  | 1.4420034 | -3.6116435 | 3.9541107  |
| Least | Views on nonorganization content that is hateful | 20 | -0.0875449 | 1.2561667 | -3.3829077 | 3.2078178  |
| Least | Views on nonorganization content that is hateful | 21 | 0.1740892  | 1.3382288 | -3.3365510 | 3.6847295  |
| Least | Views on nonorganization content that is hateful | 22 | 0.1088148  | 1.4802049 | -3.7742781 | 3.9919077  |
| Least | Views on nonorganization content that is hateful | 23 | 0.2172836  | 1.4758299 | -3.6543323 | 4.0888995  |
| Least | Views on nonorganization content that is hateful | 24 | 0.3299691  | 1.4587600 | -3.4968665 | 4.1568046  |
| Least | Views on nonorganization content that is hateful | 25 | 0.2290534  | 1.4547275 | -3.5872037 | 4.0453104  |
| Least | Views on nonorganization content that is hateful | 26 | 0.0698787  | 1.3324157 | -3.4255116 | 3.5652691  |
| Least | Views on nonorganization content that is hateful | 27 | -1.7667599 | 0.4651217 | -2.9869361 | -0.5465837 |
| Least | Views on nonorganization content that is hateful | 28 | -1.7634212 | 0.5280105 | -3.1485768 | -0.3782656 |
| Least | Views on nonorganization content that is hateful | 29 | -1.8784675 | 0.4924543 | -3.1703468 | -0.5865883 |
| Least | Views on nonorganization content that is hateful | 30 | -2.0229359 | 0.5699227 | -3.5180417 | -0.5278301 |

## Hateful comments by audience members

Average effect by length of exposure (Callaway and Sant'Anna)

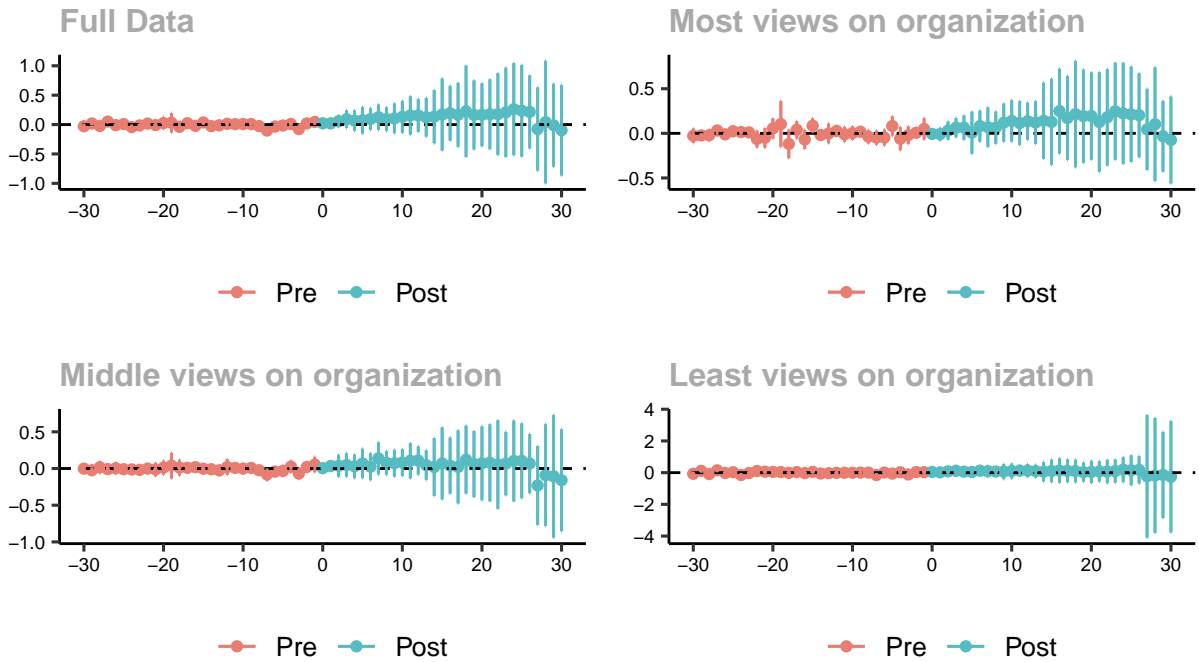

Long timeframe with sampled control groups

| sample | outcome                              | event.time | estimate   | std.error | conf.low   | conf.high |
|--------|--------------------------------------|------------|------------|-----------|------------|-----------|
| Full   | Hateful comments by audience members | -30        | -0.0287071 | 0.0177685 | -0.0735590 | 0.0161449 |
| Full   | Hateful comments by audience members | -29        | 0.0191003  | 0.0124536 | -0.0123357 | 0.0505362 |
| Full   | Hateful comments by audience members | -28        | -0.0244917 | 0.0271534 | -0.0930334 | 0.0440501 |
| Full   | Hateful comments by audience members | -27        | 0.0507824  | 0.0098183 | 0.0259986  | 0.0755663 |
| Full   | Hateful comments by audience members | -26        | -0.0101861 | 0.0087635 | -0.0323074 | 0.0119352 |
| Full   | Hateful comments by audience members | -25        | 0.0082859  | 0.0067391 | -0.0087253 | 0.0252971 |
| Full   | Hateful comments by audience members | -24        | -0.0433262 | 0.0184741 | -0.0899594 | 0.0033069 |
| Full   | Hateful comments by audience members | -23        | -0.0148243 | 0.0086045 | -0.0365441 | 0.0068954 |
| Full   | Hateful comments by audience members | -22        | 0.0162492  | 0.0180494 | -0.0293119 | 0.0618103 |
| Full   | Hateful comments by audience members | -21        | -0.0098308 | 0.0298719 | -0.0852346 | 0.0655730 |
| Full   | Hateful comments by audience members | -20        | 0.0252539  | 0.0408921 | -0.0779677 | 0.1284755 |
| Full   | Hateful comments by audience members | -19        | 0.0307480  | 0.0658380 | -0.1354430 | 0.1969391 |
| Full   | Hateful comments by audience members | -18        | -0.0383322 | 0.0322754 | -0.1198032 | 0.0431388 |
| Full   | Hateful comments by audience members | -17        | 0.0229209  | 0.0178181 | -0.0220563 | 0.0678982 |
| Full   | Hateful comments by audience members | -16        | -0.0221968 | 0.0272702 | -0.0910335 | 0.0466398 |
| Full   | Hateful comments by audience members | -15        | 0.0353950  | 0.0169097 | -0.0072892 | 0.0780792 |
| Full   | Hateful comments by audience members | -14        | -0.0265218 | 0.0189956 | -0.0744713 | 0.0214276 |
| Full   | Hateful comments by audience members | -13        | -0.0123253 | 0.0324016 | -0.0941147 | 0.0694641 |
| Full   | Hateful comments by audience members | -12        | 0.0128530  | 0.0216121 | -0.0417012 | 0.0674073 |

|      |                                      |     |            |           |            |            |
|------|--------------------------------------|-----|------------|-----------|------------|------------|
| Full | Hateful comments by audience members | -11 | 0.0061927  | 0.0265581 | -0.0608463 | 0.0732317  |
| Full | Hateful comments by audience members | -10 | 0.0086169  | 0.0343728 | -0.0781484 | 0.0953821  |
| Full | Hateful comments by audience members | -9  | 0.0081232  | 0.0091479 | -0.0149684 | 0.0312147  |
| Full | Hateful comments by audience members | -8  | -0.0262207 | 0.0236449 | -0.0859060 | 0.0334647  |
| Full | Hateful comments by audience members | -7  | -0.1015662 | 0.0271194 | -0.1700220 | -0.0331104 |
| Full | Hateful comments by audience members | -6  | -0.0336556 | 0.0366254 | -0.1261070 | 0.0587958  |
| Full | Hateful comments by audience members | -5  | -0.0162566 | 0.0228490 | -0.0739331 | 0.0414198  |
| Full | Hateful comments by audience members | -4  | 0.0099047  | 0.0135312 | -0.0242514 | 0.0440607  |
| Full | Hateful comments by audience members | -3  | -0.0768241 | 0.0312112 | -0.1556087 | 0.0019605  |
| Full | Hateful comments by audience members | -2  | 0.0186861  | 0.0210323 | -0.0344045 | 0.0717767  |
| Full | Hateful comments by audience members | -1  | 0.0448886  | 0.0200579 | -0.0057424 | 0.0955196  |
| Full | Hateful comments by audience members | 0   | 0.0216419  | 0.0333211 | -0.0624687 | 0.1057525  |
| Full | Hateful comments by audience members | 1   | 0.0207812  | 0.0271434 | -0.0477352 | 0.0892976  |
| Full | Hateful comments by audience members | 2   | 0.0568348  | 0.0392141 | -0.0421510 | 0.1558206  |
| Full | Hateful comments by audience members | 3   | 0.0919254  | 0.0597034 | -0.0587804 | 0.2426312  |
| Full | Hateful comments by audience members | 4   | 0.0667304  | 0.0683525 | -0.1058078 | 0.2392687  |
| Full | Hateful comments by audience members | 5   | 0.0731291  | 0.0898149 | -0.1535855 | 0.2998436  |
| Full | Hateful comments by audience members | 6   | 0.0931439  | 0.0723881 | -0.0895812 | 0.2758690  |
| Full | Hateful comments by audience members | 7   | 0.1243033  | 0.0859355 | -0.0926187 | 0.3412254  |
| Full | Hateful comments by audience members | 8   | 0.0923749  | 0.0795050 | -0.1083149 | 0.2930647  |
| Full | Hateful comments by audience members | 9   | 0.1052779  | 0.0999041 | -0.1469043 | 0.3574600  |
| Full | Hateful comments by audience members | 10  | 0.1318769  | 0.1076883 | -0.1399545 | 0.4037083  |
| Full | Hateful comments by audience members | 11  | 0.1552190  | 0.1288725 | -0.1700864 | 0.4805244  |
| Full | Hateful comments by audience members | 12  | 0.1560208  | 0.1103089 | -0.1224256 | 0.4344671  |
| Full | Hateful comments by audience members | 13  | 0.1246673  | 0.1300628 | -0.2036426 | 0.4529772  |
| Full | Hateful comments by audience members | 14  | 0.1336572  | 0.1790704 | -0.3183599 | 0.5856743  |
| Full | Hateful comments by audience members | 15  | 0.1709521  | 0.2426256 | -0.4414936 | 0.7833978  |
| Full | Hateful comments by audience members | 16  | 0.1936685  | 0.1842912 | -0.2715272 | 0.6588642  |
| Full | Hateful comments by audience members | 17  | 0.1666569  | 0.2151474 | -0.3764271 | 0.7097410  |
| Full | Hateful comments by audience members | 18  | 0.2254817  | 0.3077332 | -0.5513114 | 1.0022747  |
| Full | Hateful comments by audience members | 19  | 0.1634360  | 0.2322584 | -0.4228405 | 0.7497125  |
| Full | Hateful comments by audience members | 20  | 0.1657864  | 0.2121142 | -0.3696412 | 0.7012141  |
| Full | Hateful comments by audience members | 21  | 0.1747246  | 0.2350423 | -0.4185790 | 0.7680283  |
| Full | Hateful comments by audience members | 22  | 0.1770877  | 0.2745385 | -0.5159140 | 0.8700893  |
| Full | Hateful comments by audience members | 23  | 0.2083545  | 0.3003999 | -0.5499276 | 0.9666365  |
| Full | Hateful comments by audience members | 24  | 0.2612068  | 0.3103064 | -0.5220817 | 1.0444954  |
| Full | Hateful comments by audience members | 25  | 0.2358657  | 0.3086806 | -0.5433188 | 1.0150501  |
| Full | Hateful comments by audience members | 26  | 0.2147203  | 0.2456823 | -0.4054414 | 0.8348820  |
| Full | Hateful comments by audience members | 27  | -0.0760719 | 0.2803238 | -0.7836768 | 0.6315331  |
| Full | Hateful comments by audience members | 28  | 0.0421154  | 0.4126047 | -0.9993986 | 1.0836294  |
| Full | Hateful comments by audience members | 29  | -0.0109849 | 0.2791030 | -0.7155083 | 0.6935386  |

|      |                                      |    |            |           |            |           |
|------|--------------------------------------|----|------------|-----------|------------|-----------|
| Full | Hateful comments by audience members | 30 | -0.0961189 | 0.3046898 | -0.8652296 | 0.6729917 |
|------|--------------------------------------|----|------------|-----------|------------|-----------|

| sample | outcome                              | event.time | estimate   | std.error | conf.low   | conf.high |
|--------|--------------------------------------|------------|------------|-----------|------------|-----------|
| Most   | Hateful comments by audience members | -30        | -0.0277083 | 0.0324745 | -0.1081090 | 0.0526923 |
| Most   | Hateful comments by audience members | -29        | -0.0232667 | 0.0111034 | -0.0507565 | 0.0042231 |
| Most   | Hateful comments by audience members | -28        | -0.0214586 | 0.0257991 | -0.0853323 | 0.0424151 |
| Most   | Hateful comments by audience members | -27        | 0.0320385  | 0.0198281 | -0.0170522 | 0.0811292 |
| Most   | Hateful comments by audience members | -26        | -0.0108178 | 0.0110900 | -0.0382746 | 0.0166390 |
| Most   | Hateful comments by audience members | -25        | 0.0240867  | 0.0228612 | -0.0325133 | 0.0806867 |
| Most   | Hateful comments by audience members | -24        | 0.0142579  | 0.0186104 | -0.0318179 | 0.0603337 |
| Most   | Hateful comments by audience members | -23        | 0.0103328  | 0.0114217 | -0.0179452 | 0.0386108 |
| Most   | Hateful comments by audience members | -22        | -0.0635733 | 0.0381642 | -0.1580605 | 0.0309140 |
| Most   | Hateful comments by audience members | -21        | -0.0502033 | 0.0443844 | -0.1600906 | 0.0596840 |
| Most   | Hateful comments by audience members | -20        | 0.0546651  | 0.0459011 | -0.0589771 | 0.1683073 |
| Most   | Hateful comments by audience members | -19        | 0.1040016  | 0.1039190 | -0.1532820 | 0.3612851 |
| Most   | Hateful comments by audience members | -18        | -0.1188594 | 0.0642690 | -0.2779772 | 0.0402584 |
| Most   | Hateful comments by audience members | -17        | 0.0398566  | 0.0393554 | -0.0575798 | 0.1372930 |
| Most   | Hateful comments by audience members | -16        | -0.0682166 | 0.0433840 | -0.1756270 | 0.0391938 |
| Most   | Hateful comments by audience members | -15        | 0.0860026  | 0.0330165 | 0.0042601  | 0.1677450 |
| Most   | Hateful comments by audience members | -14        | -0.0195148 | 0.0131358 | -0.0520364 | 0.0130068 |
| Most   | Hateful comments by audience members | -13        | -0.0006550 | 0.0445050 | -0.1108408 | 0.1095308 |
| Most   | Hateful comments by audience members | -12        | 0.0271365  | 0.0235906 | -0.0312692 | 0.0855423 |
| Most   | Hateful comments by audience members | -11        | -0.0106581 | 0.0336610 | -0.0939963 | 0.0726800 |
| Most   | Hateful comments by audience members | -10        | 0.0024472  | 0.0304329 | -0.0728988 | 0.0777932 |
| Most   | Hateful comments by audience members | -9         | 0.0179341  | 0.0207499 | -0.0334388 | 0.0693069 |
| Most   | Hateful comments by audience members | -8         | -0.0379326 | 0.0306238 | -0.1137512 | 0.0378860 |
| Most   | Hateful comments by audience members | -7         | -0.0480131 | 0.0319373 | -0.1270837 | 0.0310574 |
| Most   | Hateful comments by audience members | -6         | -0.0472155 | 0.0361904 | -0.1368160 | 0.0423849 |
| Most   | Hateful comments by audience members | -5         | 0.0824528  | 0.0434192 | -0.0250448 | 0.1899503 |
| Most   | Hateful comments by audience members | -4         | -0.0598006 | 0.0521476 | -0.1889082 | 0.0693069 |
| Most   | Hateful comments by audience members | -3         | -0.0208892 | 0.0401156 | -0.1202077 | 0.0784293 |
| Most   | Hateful comments by audience members | -2         | 0.0063276  | 0.0214369 | -0.0467461 | 0.0594013 |
| Most   | Hateful comments by audience members | -1         | 0.0500950  | 0.0480981 | -0.0689867 | 0.1691767 |
| Most   | Hateful comments by audience members | 0          | -0.0061065 | 0.0196684 | -0.0548016 | 0.0425885 |
| Most   | Hateful comments by audience members | 1          | -0.0089125 | 0.0289916 | -0.0806901 | 0.0628651 |
| Most   | Hateful comments by audience members | 2          | 0.0305133  | 0.0407559 | -0.0703904 | 0.1314169 |
| Most   | Hateful comments by audience members | 3          | 0.0642492  | 0.0435815 | -0.0436503 | 0.1721487 |
| Most   | Hateful comments by audience members | 4          | 0.0639637  | 0.0546323 | -0.0712955 | 0.1992228 |
| Most   | Hateful comments by audience members | 5          | 0.0069177  | 0.0951830 | -0.2287372 | 0.2425726 |
| Most   | Hateful comments by audience members | 6          | 0.0815194  | 0.0702968 | -0.0925220 | 0.2555607 |
| Most   | Hateful comments by audience members | 7          | 0.0693564  | 0.0896293 | -0.1525485 | 0.2912613 |



|      |                                      |    |            |           |            |           |
|------|--------------------------------------|----|------------|-----------|------------|-----------|
| Most | Hateful comments by audience members | 8  | 0.0637484  | 0.0728950 | -0.1167256 | 0.2442223 |
| Most | Hateful comments by audience members | 9  | 0.1198647  | 0.0861656 | -0.0934647 | 0.3331941 |
| Most | Hateful comments by audience members | 10 | 0.1392694  | 0.0938068 | -0.0929782 | 0.3715169 |
| Most | Hateful comments by audience members | 11 | 0.1148299  | 0.0986074 | -0.1293030 | 0.3589629 |
| Most | Hateful comments by audience members | 12 | 0.1360046  | 0.0833809 | -0.0704305 | 0.3424396 |
| Most | Hateful comments by audience members | 13 | 0.1215969  | 0.0964950 | -0.1173062 | 0.3604999 |
| Most | Hateful comments by audience members | 14 | 0.1408256  | 0.1719983 | -0.2850092 | 0.5666603 |
| Most | Hateful comments by audience members | 15 | 0.1279253  | 0.1950414 | -0.3549597 | 0.6108103 |
| Most | Hateful comments by audience members | 16 | 0.2495502  | 0.1916517 | -0.2249426 | 0.7240431 |
| Most | Hateful comments by audience members | 17 | 0.1717438  | 0.1896366 | -0.2977599 | 0.6412476 |
| Most | Hateful comments by audience members | 18 | 0.2158114  | 0.2409320 | -0.3806900 | 0.8123129 |
| Most | Hateful comments by audience members | 19 | 0.1928495  | 0.2103578 | -0.3279561 | 0.7136551 |
| Most | Hateful comments by audience members | 20 | 0.1947501  | 0.1971712 | -0.2934081 | 0.6829083 |
| Most | Hateful comments by audience members | 21 | 0.1275167  | 0.2252439 | -0.4301439 | 0.6851773 |
| Most | Hateful comments by audience members | 22 | 0.1794800  | 0.2180273 | -0.3603137 | 0.7192738 |
| Most | Hateful comments by audience members | 23 | 0.2479975  | 0.2194720 | -0.2953730 | 0.7913679 |
| Most | Hateful comments by audience members | 24 | 0.2237337  | 0.2293134 | -0.3440023 | 0.7914697 |
| Most | Hateful comments by audience members | 25 | 0.2129161  | 0.2159251 | -0.3216729 | 0.7475051 |
| Most | Hateful comments by audience members | 26 | 0.2029611  | 0.1899667 | -0.2673600 | 0.6732823 |
| Most | Hateful comments by audience members | 27 | 0.0438719  | 0.1836919 | -0.4109140 | 0.4986578 |
| Most | Hateful comments by audience members | 28 | 0.1018700  | 0.2571102 | -0.5346856 | 0.7384257 |
| Most | Hateful comments by audience members | 29 | -0.0329120 | 0.1600888 | -0.4292611 | 0.3634370 |
| Most | Hateful comments by audience members | 30 | -0.0744030 | 0.1961695 | -0.5600809 | 0.4112750 |

| sample | outcome                              | event.time | estimate   | std.error | conf.low   | conf.high |
|--------|--------------------------------------|------------|------------|-----------|------------|-----------|
| Middle | Hateful comments by audience members | -30        | -0.0017320 | 0.0193146 | -0.0500812 | 0.0466173 |
| Middle | Hateful comments by audience members | -29        | -0.0236604 | 0.0162583 | -0.0643590 | 0.0170382 |
| Middle | Hateful comments by audience members | -28        | 0.0162837  | 0.0320624 | -0.0639764 | 0.0965439 |
| Middle | Hateful comments by audience members | -27        | -0.0087147 | 0.0147006 | -0.0455139 | 0.0280845 |
| Middle | Hateful comments by audience members | -26        | 0.0026047  | 0.0315410 | -0.0763501 | 0.0815595 |
| Middle | Hateful comments by audience members | -25        | -0.0096602 | 0.0100669 | -0.0348601 | 0.0155397 |
| Middle | Hateful comments by audience members | -24        | -0.0125167 | 0.0139906 | -0.0475385 | 0.0225051 |
| Middle | Hateful comments by audience members | -23        | -0.0179543 | 0.0086233 | -0.0395405 | 0.0036320 |
| Middle | Hateful comments by audience members | -22        | -0.0013404 | 0.0136949 | -0.0356221 | 0.0329413 |
| Middle | Hateful comments by audience members | -21        | -0.0133287 | 0.0366063 | -0.1049634 | 0.0783059 |
| Middle | Hateful comments by audience members | -20        | 0.0110668  | 0.0377081 | -0.0833257 | 0.1054594 |
| Middle | Hateful comments by audience members | -19        | 0.0384241  | 0.0694105 | -0.1353276 | 0.2121757 |
| Middle | Hateful comments by audience members | -18        | 0.0122371  | 0.0428002 | -0.0949024 | 0.1193765 |
| Middle | Hateful comments by audience members | -17        | 0.0094934  | 0.0145322 | -0.0268841 | 0.0458710 |
| Middle | Hateful comments by audience members | -16        | 0.0179194  | 0.0226790 | -0.0388516 | 0.0746904 |
| Middle | Hateful comments by audience members | -15        | -0.0028817 | 0.0242783 | -0.0636562 | 0.0578928 |

|        |                                      |     |            |           |            |           |
|--------|--------------------------------------|-----|------------|-----------|------------|-----------|
| Middle | Hateful comments by audience members | -14 | -0.0102001 | 0.0143903 | -0.0462226 | 0.0258225 |
| Middle | Hateful comments by audience members | -13 | -0.0247847 | 0.0264920 | -0.0911007 | 0.0415313 |
| Middle | Hateful comments by audience members | -12 | 0.0208939  | 0.0430311 | -0.0868235 | 0.1286114 |
| Middle | Hateful comments by audience members | -11 | 0.0085118  | 0.0240720 | -0.0517464 | 0.0687700 |
| Middle | Hateful comments by audience members | -10 | -0.0015088 | 0.0243162 | -0.0623781 | 0.0593606 |
| Middle | Hateful comments by audience members | -9  | 0.0075804  | 0.0130032 | -0.0249697 | 0.0401306 |
| Middle | Hateful comments by audience members | -8  | -0.0235523 | 0.0165073 | -0.0648741 | 0.0177695 |
| Middle | Hateful comments by audience members | -7  | -0.0811083 | 0.0334308 | -0.1647937 | 0.0025771 |
| Middle | Hateful comments by audience members | -6  | -0.0420818 | 0.0244717 | -0.1033404 | 0.0191768 |
| Middle | Hateful comments by audience members | -5  | -0.0326073 | 0.0288640 | -0.1048609 | 0.0396462 |
| Middle | Hateful comments by audience members | -4  | 0.0255481  | 0.0324768 | -0.0557492 | 0.1068455 |
| Middle | Hateful comments by audience members | -3  | -0.0688348 | 0.0292038 | -0.1419392 | 0.0042696 |
| Middle | Hateful comments by audience members | -2  | 0.0205864  | 0.0263793 | -0.0454474 | 0.0866203 |
| Middle | Hateful comments by audience members | -1  | 0.0536105  | 0.0417884 | -0.0509961 | 0.1582171 |
| Middle | Hateful comments by audience members | 0   | 0.0048145  | 0.0224616 | -0.0514124 | 0.0610415 |
| Middle | Hateful comments by audience members | 1   | 0.0339032  | 0.0252092 | -0.0292016 | 0.0970081 |
| Middle | Hateful comments by audience members | 2   | 0.0366104  | 0.0597768 | -0.1130257 | 0.1862465 |
| Middle | Hateful comments by audience members | 3   | 0.0485992  | 0.0630755 | -0.1092943 | 0.2064927 |
| Middle | Hateful comments by audience members | 4   | 0.0290935  | 0.0640459 | -0.1312292 | 0.1894162 |
| Middle | Hateful comments by audience members | 5   | 0.0687521  | 0.0798769 | -0.1311993 | 0.2687036 |
| Middle | Hateful comments by audience members | 6   | 0.0248647  | 0.0736430 | -0.1594818 | 0.2092111 |
| Middle | Hateful comments by audience members | 7   | 0.1384139  | 0.0872484 | -0.0799904 | 0.3568181 |
| Middle | Hateful comments by audience members | 8   | 0.0764310  | 0.0642465 | -0.0843939 | 0.2372558 |
| Middle | Hateful comments by audience members | 9   | 0.0715747  | 0.0726181 | -0.1102063 | 0.2533557 |
| Middle | Hateful comments by audience members | 10  | 0.0812976  | 0.0725956 | -0.1004272 | 0.2630223 |
| Middle | Hateful comments by audience members | 11  | 0.1056563  | 0.0959234 | -0.1344636 | 0.3457762 |
| Middle | Hateful comments by audience members | 12  | 0.1090075  | 0.0762789 | -0.0819373 | 0.2999523 |
| Middle | Hateful comments by audience members | 13  | 0.0460447  | 0.0799639 | -0.1541246 | 0.2462140 |
| Middle | Hateful comments by audience members | 14  | 0.0204340  | 0.1569259 | -0.3723902 | 0.4132583 |
| Middle | Hateful comments by audience members | 15  | 0.0698950  | 0.1959046 | -0.4205026 | 0.5602925 |
| Middle | Hateful comments by audience members | 16  | 0.0390811  | 0.1525876 | -0.3428833 | 0.4210455 |
| Middle | Hateful comments by audience members | 17  | 0.0212998  | 0.1985546 | -0.4757312 | 0.5183307 |
| Middle | Hateful comments by audience members | 18  | 0.1211909  | 0.1844440 | -0.3405180 | 0.5828997 |
| Middle | Hateful comments by audience members | 19  | 0.0602951  | 0.1799557 | -0.3901783 | 0.5107686 |
| Middle | Hateful comments by audience members | 20  | 0.0706683  | 0.2007932 | -0.4319665 | 0.5733030 |
| Middle | Hateful comments by audience members | 21  | 0.0789000  | 0.2094563 | -0.4454206 | 0.6032207 |
| Middle | Hateful comments by audience members | 22  | 0.0550132  | 0.2408026 | -0.5477751 | 0.6578014 |
| Middle | Hateful comments by audience members | 23  | 0.0669339  | 0.1725669 | -0.3650435 | 0.4989114 |
| Middle | Hateful comments by audience members | 24  | 0.1027115  | 0.2197312 | -0.4473299 | 0.6527529 |
| Middle | Hateful comments by audience members | 25  | 0.1048040  | 0.2035764 | -0.4047979 | 0.6144059 |
| Middle | Hateful comments by audience members | 26  | 0.0671337  | 0.1613004 | -0.3366408 | 0.4709083 |

|        |                                      |    |            |           |            |           |
|--------|--------------------------------------|----|------------|-----------|------------|-----------|
| Middle | Hateful comments by audience members | 27 | -0.2307822 | 0.2143952 | -0.7674662 | 0.3059019 |
| Middle | Hateful comments by audience members | 28 | -0.0903263 | 0.2768552 | -0.7833630 | 0.6027104 |
| Middle | Hateful comments by audience members | 29 | -0.1060431 | 0.3331775 | -0.9400683 | 0.7279822 |
| Middle | Hateful comments by audience members | 30 | -0.1592480 | 0.2774428 | -0.8537557 | 0.5352596 |

| sample | outcome                              | event.time | estimate   | std.error | conf.low   | conf.high  |
|--------|--------------------------------------|------------|------------|-----------|------------|------------|
| Least  | Hateful comments by audience members | -30        | -0.0699349 | 0.0356687 | -0.1573901 | 0.0175204  |
| Least  | Hateful comments by audience members | -29        | 0.1168941  | 0.0318554 | 0.0387886  | 0.1949997  |
| Least  | Hateful comments by audience members | -28        | -0.0883992 | 0.0460658 | -0.2013467 | 0.0245483  |
| Least  | Hateful comments by audience members | -27        | 0.1456597  | 0.0347701 | 0.0604078  | 0.2309116  |
| Least  | Hateful comments by audience members | -26        | -0.0220879 | 0.0467593 | -0.1367358 | 0.0925600  |
| Least  | Hateful comments by audience members | -25        | 0.0263188  | 0.0304066 | -0.0482342 | 0.1008719  |
| Least  | Hateful comments by audience members | -24        | -0.1479596 | 0.0513044 | -0.2737517 | -0.0221676 |
| Least  | Hateful comments by audience members | -23        | -0.0229368 | 0.0129618 | -0.0547175 | 0.0088438  |
| Least  | Hateful comments by audience members | -22        | 0.1036772  | 0.0295926 | 0.0311197  | 0.1762346  |
| Least  | Hateful comments by audience members | -21        | 0.0583097  | 0.0584618 | -0.0850312 | 0.2016507  |
| Least  | Hateful comments by audience members | -20        | 0.0499480  | 0.0564601 | -0.0884850 | 0.1883811  |
| Least  | Hateful comments by audience members | -19        | 0.0379298  | 0.0822543 | -0.1637475 | 0.2396072  |
| Least  | Hateful comments by audience members | -18        | -0.0145824 | 0.0464351 | -0.1284355 | 0.0992706  |
| Least  | Hateful comments by audience members | -17        | 0.0355714  | 0.0292094 | -0.0360463 | 0.1071892  |
| Least  | Hateful comments by audience members | -16        | -0.0296612 | 0.0337477 | -0.1124065 | 0.0530841  |
| Least  | Hateful comments by audience members | -15        | 0.0505695  | 0.0303465 | -0.0238364 | 0.1249754  |
| Least  | Hateful comments by audience members | -14        | -0.0517874 | 0.0428458 | -0.1568401 | 0.0532652  |
| Least  | Hateful comments by audience members | -13        | -0.0358861 | 0.0643034 | -0.1935501 | 0.1217778  |
| Least  | Hateful comments by audience members | -12        | -0.0152889 | 0.0399522 | -0.1132466 | 0.0826689  |
| Least  | Hateful comments by audience members | -11        | -0.0050195 | 0.0363034 | -0.0940308 | 0.0839918  |
| Least  | Hateful comments by audience members | -10        | -0.0061476 | 0.0552292 | -0.1415627 | 0.1292675  |
| Least  | Hateful comments by audience members | -9         | 0.0021631  | 0.0347286 | -0.0829870 | 0.0873133  |
| Least  | Hateful comments by audience members | -8         | 0.0023923  | 0.0437104 | -0.1047801 | 0.1095647  |
| Least  | Hateful comments by audience members | -7         | -0.1518512 | 0.0507530 | -0.2762912 | -0.0274113 |
| Least  | Hateful comments by audience members | -6         | 0.0086645  | 0.0629532 | -0.1456889 | 0.1630179  |
| Least  | Hateful comments by audience members | -5         | -0.0565600 | 0.0378009 | -0.1492430 | 0.0361230  |
| Least  | Hateful comments by audience members | -4         | 0.0276373  | 0.0555376 | -0.1085340 | 0.1638086  |
| Least  | Hateful comments by audience members | -3         | -0.1126025 | 0.0792720 | -0.3069675 | 0.0817625  |
| Least  | Hateful comments by audience members | -2         | 0.0319188  | 0.0851180 | -0.1767798 | 0.2406174  |
| Least  | Hateful comments by audience members | -1         | 0.0294951  | 0.0581077 | -0.1129776 | 0.1719678  |
| Least  | Hateful comments by audience members | 0          | 0.0440451  | 0.1096082 | -0.2247004 | 0.3127907  |
| Least  | Hateful comments by audience members | 1          | 0.0188539  | 0.0520661 | -0.1088057 | 0.1465135  |
| Least  | Hateful comments by audience members | 2          | 0.0771801  | 0.0841559 | -0.1291596 | 0.2835198  |
| Least  | Hateful comments by audience members | 3          | 0.1184143  | 0.1167900 | -0.1679403 | 0.4047689  |
| Least  | Hateful comments by audience members | 4          | 0.0596463  | 0.1060214 | -0.2003050 | 0.3195975  |

|       |                                      |    |            |           |            |           |
|-------|--------------------------------------|----|------------|-----------|------------|-----------|
| Least | Hateful comments by audience members | 5  | 0.0422227  | 0.1074315 | -0.2211860 | 0.3056314 |
| Least | Hateful comments by audience members | 6  | 0.1236375  | 0.1129729 | -0.1533579 | 0.4006329 |
| Least | Hateful comments by audience members | 7  | 0.0888043  | 0.1425686 | -0.2607562 | 0.4383648 |
| Least | Hateful comments by audience members | 8  | 0.0692034  | 0.1083298 | -0.1964079 | 0.3348146 |
| Least | Hateful comments by audience members | 9  | 0.0674819  | 0.1936533 | -0.4073318 | 0.5422955 |
| Least | Hateful comments by audience members | 10 | 0.1000250  | 0.1907511 | -0.3676729 | 0.5677229 |
| Least | Hateful comments by audience members | 11 | 0.1239944  | 0.1339904 | -0.2045333 | 0.4525220 |
| Least | Hateful comments by audience members | 12 | 0.1290091  | 0.1689422 | -0.2852160 | 0.5432342 |
| Least | Hateful comments by audience members | 13 | 0.0952686  | 0.1647930 | -0.3087832 | 0.4993204 |
| Least | Hateful comments by audience members | 14 | 0.0619542  | 0.2488448 | -0.5481821 | 0.6720906 |
| Least | Hateful comments by audience members | 15 | 0.1064031  | 0.2904604 | -0.6057694 | 0.8185757 |
| Least | Hateful comments by audience members | 16 | 0.1318744  | 0.3123090 | -0.6338683 | 0.8976172 |
| Least | Hateful comments by audience members | 17 | 0.1108376  | 0.2918728 | -0.6047980 | 0.8264731 |
| Least | Hateful comments by audience members | 18 | 0.1024873  | 0.2915173 | -0.6122768 | 0.8172513 |
| Least | Hateful comments by audience members | 19 | 0.0336135  | 0.2430936 | -0.5624217 | 0.6296487 |
| Least | Hateful comments by audience members | 20 | 0.0452523  | 0.2859456 | -0.6558507 | 0.7463552 |
| Least | Hateful comments by audience members | 21 | 0.0812413  | 0.2609017 | -0.5584570 | 0.7209397 |
| Least | Hateful comments by audience members | 22 | 0.0688333  | 0.3015822 | -0.6706087 | 0.8082752 |
| Least | Hateful comments by audience members | 23 | 0.0996324  | 0.2957916 | -0.6256118 | 0.8248765 |
| Least | Hateful comments by audience members | 24 | 0.1870722  | 0.3224217 | -0.6034654 | 0.9776099 |
| Least | Hateful comments by audience members | 25 | 0.1495315  | 0.3828962 | -0.7892823 | 1.0883453 |
| Least | Hateful comments by audience members | 26 | 0.1745092  | 0.3511203 | -0.6863941 | 1.0354125 |
| Least | Hateful comments by audience members | 27 | -0.2302368 | 1.5747329 | -4.0912853 | 3.6308116 |
| Least | Hateful comments by audience members | 28 | -0.1750829 | 1.4781781 | -3.7993913 | 3.4492255 |
| Least | Hateful comments by audience members | 29 | -0.1449851 | 1.1063871 | -2.8577082 | 2.5677380 |
| Least | Hateful comments by audience members | 30 | -0.2575925 | 1.4306289 | -3.7653160 | 3.2501309 |

## Hateful comments/total comments

Average effect by length of exposure (Callaway and Sant'Anna)

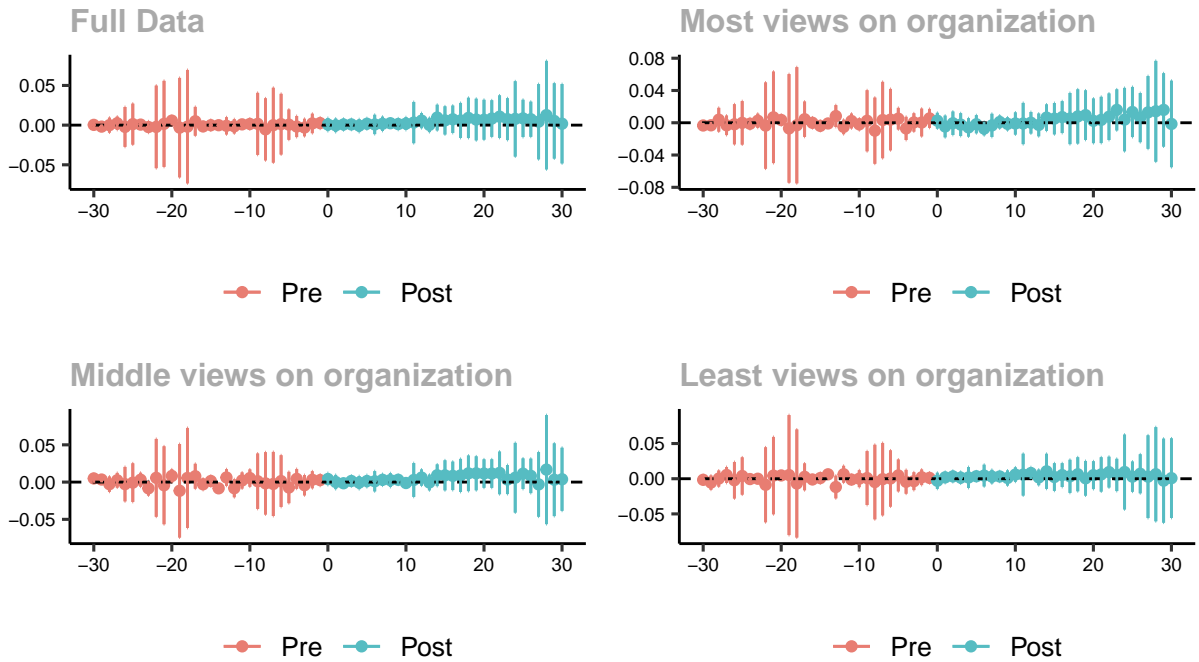

Long timeframe with sampled control groups

| sample | outcome                         | event.time | estimate   | std.error | conf.low   | conf.high |
|--------|---------------------------------|------------|------------|-----------|------------|-----------|
| Full   | Hateful comments/total comments | -30        | 0.0003424  | 0.0020553 | -0.0045954 | 0.0052801 |
| Full   | Hateful comments/total comments | -29        | -0.0018527 | 0.0010953 | -0.0044840 | 0.0007786 |
| Full   | Hateful comments/total comments | -28        | -0.0000078 | 0.0039156 | -0.0094148 | 0.0093992 |
| Full   | Hateful comments/total comments | -27        | 0.0023865  | 0.0034898 | -0.0059976 | 0.0107707 |
| Full   | Hateful comments/total comments | -26        | -0.0022388 | 0.0104475 | -0.0273384 | 0.0228607 |
| Full   | Hateful comments/total comments | -25        | 0.0012780  | 0.0107344 | -0.0245109 | 0.0270669 |
| Full   | Hateful comments/total comments | -24        | 0.0006589  | 0.0014413 | -0.0028037 | 0.0041216 |
| Full   | Hateful comments/total comments | -23        | -0.0023817 | 0.0030220 | -0.0096418 | 0.0048784 |
| Full   | Hateful comments/total comments | -22        | -0.0022161 | 0.0216471 | -0.0542222 | 0.0497899 |
| Full   | Hateful comments/total comments | -21        | 0.0016137  | 0.0225585 | -0.0525819 | 0.0558093 |
| Full   | Hateful comments/total comments | -20        | 0.0056549  | 0.0024769 | -0.0002957 | 0.0116055 |
| Full   | Hateful comments/total comments | -19        | -0.0031333 | 0.0260716 | -0.0657689 | 0.0595022 |
| Full   | Hateful comments/total comments | -18        | -0.0018800 | 0.0297309 | -0.0733068 | 0.0695469 |
| Full   | Hateful comments/total comments | -17        | 0.0048652  | 0.0075405 | -0.0132505 | 0.0229809 |
| Full   | Hateful comments/total comments | -16        | -0.0016198 | 0.0023217 | -0.0071977 | 0.0039580 |
| Full   | Hateful comments/total comments | -15        | -0.0000961 | 0.0028079 | -0.0068420 | 0.0066498 |
| Full   | Hateful comments/total comments | -14        | -0.0000824 | 0.0016746 | -0.0041055 | 0.0039407 |
| Full   | Hateful comments/total comments | -13        | -0.0008633 | 0.0045058 | -0.0116882 | 0.0099616 |
| Full   | Hateful comments/total comments | -12        | -0.0014771 | 0.0037466 | -0.0104782 | 0.0075240 |

|      |                                 |     |            |           |            |           |
|------|---------------------------------|-----|------------|-----------|------------|-----------|
| Full | Hateful comments/total comments | -11 | 0.0009781  | 0.0012179 | -0.0019478 | 0.0039039 |
| Full | Hateful comments/total comments | -10 | 0.0014610  | 0.0028574 | -0.0054037 | 0.0083257 |
| Full | Hateful comments/total comments | -9  | 0.0016213  | 0.0162551 | -0.0374306 | 0.0406733 |
| Full | Hateful comments/total comments | -8  | -0.0052898 | 0.0162686 | -0.0443743 | 0.0337946 |
| Full | Hateful comments/total comments | -7  | -0.0000661 | 0.0196283 | -0.0472221 | 0.0470900 |
| Full | Hateful comments/total comments | -6  | 0.0012301  | 0.0159204 | -0.0370179 | 0.0394781 |
| Full | Hateful comments/total comments | -5  | 0.0006052  | 0.0079449 | -0.0184820 | 0.0196923 |
| Full | Hateful comments/total comments | -4  | -0.0017670 | 0.0055343 | -0.0150628 | 0.0115288 |
| Full | Hateful comments/total comments | -3  | -0.0030160 | 0.0045853 | -0.0140321 | 0.0080000 |
| Full | Hateful comments/total comments | -2  | 0.0021292  | 0.0051092 | -0.0101453 | 0.0144037 |
| Full | Hateful comments/total comments | -1  | 0.0025844  | 0.0029808 | -0.0045767 | 0.0097455 |
| Full | Hateful comments/total comments | 0   | 0.0007669  | 0.0034398 | -0.0074971 | 0.0090309 |
| Full | Hateful comments/total comments | 1   | -0.0002335 | 0.0035465 | -0.0087537 | 0.0082867 |
| Full | Hateful comments/total comments | 2   | 0.0007830  | 0.0030406 | -0.0065218 | 0.0080879 |
| Full | Hateful comments/total comments | 3   | 0.0009026  | 0.0028507 | -0.0059461 | 0.0077513 |
| Full | Hateful comments/total comments | 4   | -0.0006324 | 0.0033899 | -0.0087764 | 0.0075115 |
| Full | Hateful comments/total comments | 5   | 0.0017353  | 0.0029753 | -0.0054127 | 0.0088833 |
| Full | Hateful comments/total comments | 6   | 0.0008713  | 0.0050677 | -0.0113035 | 0.0130462 |
| Full | Hateful comments/total comments | 7   | 0.0016649  | 0.0037279 | -0.0072913 | 0.0106210 |
| Full | Hateful comments/total comments | 8   | 0.0024062  | 0.0023041 | -0.0031293 | 0.0079417 |
| Full | Hateful comments/total comments | 9   | 0.0013252  | 0.0030286 | -0.0059509 | 0.0086014 |
| Full | Hateful comments/total comments | 10  | 0.0019476  | 0.0033597 | -0.0061239 | 0.0100191 |
| Full | Hateful comments/total comments | 11  | 0.0032422  | 0.0108104 | -0.0227292 | 0.0292136 |
| Full | Hateful comments/total comments | 12  | 0.0056949  | 0.0039727 | -0.0038494 | 0.0152391 |
| Full | Hateful comments/total comments | 13  | 0.0002702  | 0.0037561 | -0.0087536 | 0.0092940 |
| Full | Hateful comments/total comments | 14  | 0.0095352  | 0.0067334 | -0.0066414 | 0.0257118 |
| Full | Hateful comments/total comments | 15  | 0.0059506  | 0.0073833 | -0.0117874 | 0.0236886 |
| Full | Hateful comments/total comments | 16  | 0.0073616  | 0.0071899 | -0.0099117 | 0.0246349 |
| Full | Hateful comments/total comments | 17  | 0.0059086  | 0.0091894 | -0.0161684 | 0.0279856 |
| Full | Hateful comments/total comments | 18  | 0.0091144  | 0.0105640 | -0.0162651 | 0.0344938 |
| Full | Hateful comments/total comments | 19  | 0.0070402  | 0.0109154 | -0.0191834 | 0.0332639 |
| Full | Hateful comments/total comments | 20  | 0.0067979  | 0.0104566 | -0.0183235 | 0.0319194 |
| Full | Hateful comments/total comments | 21  | 0.0082926  | 0.0095820 | -0.0147276 | 0.0313128 |
| Full | Hateful comments/total comments | 22  | 0.0106925  | 0.0111520 | -0.0160995 | 0.0374846 |
| Full | Hateful comments/total comments | 23  | 0.0075548  | 0.0109796 | -0.0188232 | 0.0339327 |
| Full | Hateful comments/total comments | 24  | 0.0078519  | 0.0197403 | -0.0395731 | 0.0552769 |
| Full | Hateful comments/total comments | 25  | 0.0084992  | 0.0097674 | -0.0149666 | 0.0319649 |
| Full | Hateful comments/total comments | 26  | 0.0074213  | 0.0092047 | -0.0146926 | 0.0295352 |
| Full | Hateful comments/total comments | 27  | 0.0043628  | 0.0197348 | -0.0430490 | 0.0517747 |
| Full | Hateful comments/total comments | 28  | 0.0126260  | 0.0284505 | -0.0557249 | 0.0809769 |
| Full | Hateful comments/total comments | 29  | 0.0053105  | 0.0197396 | -0.0421128 | 0.0527337 |

|      |                                 |    |           |           |            |           |
|------|---------------------------------|----|-----------|-----------|------------|-----------|
| Full | Hateful comments/total comments | 30 | 0.0017730 | 0.0208079 | -0.0482168 | 0.0517628 |
|------|---------------------------------|----|-----------|-----------|------------|-----------|

| sample | outcome                         | event.time | estimate   | std.error | conf.low   | conf.high  |
|--------|---------------------------------|------------|------------|-----------|------------|------------|
| Most   | Hateful comments/total comments | -30        | -0.0033783 | 0.0012696 | -0.0065020 | -0.0002546 |
| Most   | Hateful comments/total comments | -29        | -0.0031475 | 0.0017361 | -0.0074190 | 0.0011239  |
| Most   | Hateful comments/total comments | -28        | 0.0037974  | 0.0059796 | -0.0109148 | 0.0185095  |
| Most   | Hateful comments/total comments | -27        | -0.0031909 | 0.0049101 | -0.0152719 | 0.0088900  |
| Most   | Hateful comments/total comments | -26        | -0.0018828 | 0.0100885 | -0.0267046 | 0.0229389  |
| Most   | Hateful comments/total comments | -25        | -0.0000975 | 0.0109424 | -0.0270203 | 0.0268253  |
| Most   | Hateful comments/total comments | -24        | -0.0011811 | 0.0027494 | -0.0079458 | 0.0055835  |
| Most   | Hateful comments/total comments | -23        | 0.0025002  | 0.0035727 | -0.0062902 | 0.0112906  |
| Most   | Hateful comments/total comments | -22        | -0.0034734 | 0.0217066 | -0.0568804 | 0.0499336  |
| Most   | Hateful comments/total comments | -21        | 0.0067260  | 0.0230377 | -0.0499561 | 0.0634080  |
| Most   | Hateful comments/total comments | -20        | 0.0034360  | 0.0026550 | -0.0030964 | 0.0099684  |
| Most   | Hateful comments/total comments | -19        | -0.0069707 | 0.0273373 | -0.0742314 | 0.0602901  |
| Most   | Hateful comments/total comments | -18        | -0.0030768 | 0.0292498 | -0.0750432 | 0.0688896  |
| Most   | Hateful comments/total comments | -17        | 0.0044034  | 0.0088932 | -0.0174774 | 0.0262842  |
| Most   | Hateful comments/total comments | -16        | -0.0000398 | 0.0027273 | -0.0067500 | 0.0066704  |
| Most   | Hateful comments/total comments | -15        | -0.0038524 | 0.0025927 | -0.0102315 | 0.0025268  |
| Most   | Hateful comments/total comments | -14        | -0.0008650 | 0.0020557 | -0.0059228 | 0.0041927  |
| Most   | Hateful comments/total comments | -13        | 0.0082772  | 0.0055005 | -0.0052562 | 0.0218105  |
| Most   | Hateful comments/total comments | -12        | -0.0051419 | 0.0036515 | -0.0141262 | 0.0038423  |
| Most   | Hateful comments/total comments | -11        | 0.0021955  | 0.0037172 | -0.0069502 | 0.0113413  |
| Most   | Hateful comments/total comments | -10        | -0.0019334 | 0.0029604 | -0.0092171 | 0.0053503  |
| Most   | Hateful comments/total comments | -9         | 0.0024682  | 0.0153789 | -0.0353701 | 0.0403065  |
| Most   | Hateful comments/total comments | -8         | -0.0097924 | 0.0166472 | -0.0507513 | 0.0311664  |
| Most   | Hateful comments/total comments | -7         | 0.0033814  | 0.0192221 | -0.0439128 | 0.0506755  |
| Most   | Hateful comments/total comments | -6         | 0.0038899  | 0.0154608 | -0.0341499 | 0.0419296  |
| Most   | Hateful comments/total comments | -5         | 0.0050687  | 0.0054341 | -0.0083013 | 0.0184386  |
| Most   | Hateful comments/total comments | -4         | -0.0070129 | 0.0058401 | -0.0213818 | 0.0073560  |
| Most   | Hateful comments/total comments | -3         | 0.0003938  | 0.0046138 | -0.0109580 | 0.0117455  |
| Most   | Hateful comments/total comments | -2         | 0.0003367  | 0.0069798 | -0.0168364 | 0.0175098  |
| Most   | Hateful comments/total comments | -1         | 0.0054283  | 0.0047733 | -0.0063159 | 0.0171725  |
| Most   | Hateful comments/total comments | 0          | 0.0025770  | 0.0039745 | -0.0072019 | 0.0123559  |
| Most   | Hateful comments/total comments | 1          | -0.0045891 | 0.0054642 | -0.0180332 | 0.0088549  |
| Most   | Hateful comments/total comments | 2          | -0.0006084 | 0.0059038 | -0.0151341 | 0.0139174  |
| Most   | Hateful comments/total comments | 3          | -0.0022961 | 0.0057507 | -0.0164450 | 0.0118529  |
| Most   | Hateful comments/total comments | 4          | -0.0057536 | 0.0046200 | -0.0171206 | 0.0056134  |
| Most   | Hateful comments/total comments | 5          | -0.0018293 | 0.0045611 | -0.0130513 | 0.0093927  |
| Most   | Hateful comments/total comments | 6          | -0.0072071 | 0.0033907 | -0.0155497 | 0.0011355  |
| Most   | Hateful comments/total comments | 7          | -0.0032522 | 0.0058402 | -0.0176215 | 0.0111172  |

|      |                                 |    |            |           |            |           |
|------|---------------------------------|----|------------|-----------|------------|-----------|
| Most | Hateful comments/total comments | 8  | 0.0009397  | 0.0032772 | -0.0071235 | 0.0090029 |
| Most | Hateful comments/total comments | 9  | -0.0013675 | 0.0032730 | -0.0094205 | 0.0066856 |
| Most | Hateful comments/total comments | 10 | -0.0008859 | 0.0055788 | -0.0146119 | 0.0128402 |
| Most | Hateful comments/total comments | 11 | -0.0009358 | 0.0103865 | -0.0264908 | 0.0246193 |
| Most | Hateful comments/total comments | 12 | 0.0000231  | 0.0054283 | -0.0133327 | 0.0133790 |
| Most | Hateful comments/total comments | 13 | -0.0026792 | 0.0057230 | -0.0167601 | 0.0114018 |
| Most | Hateful comments/total comments | 14 | 0.0064005  | 0.0066519 | -0.0099658 | 0.0227669 |
| Most | Hateful comments/total comments | 15 | 0.0050974  | 0.0078922 | -0.0143206 | 0.0245155 |
| Most | Hateful comments/total comments | 16 | 0.0070180  | 0.0080158 | -0.0127041 | 0.0267402 |
| Most | Hateful comments/total comments | 17 | 0.0052202  | 0.0128903 | -0.0264952 | 0.0369356 |
| Most | Hateful comments/total comments | 18 | 0.0078678  | 0.0136408 | -0.0256941 | 0.0414297 |
| Most | Hateful comments/total comments | 19 | 0.0094459  | 0.0124796 | -0.0212588 | 0.0401507 |
| Most | Hateful comments/total comments | 20 | 0.0023873  | 0.0112320 | -0.0252480 | 0.0300225 |
| Most | Hateful comments/total comments | 21 | 0.0035172  | 0.0116530 | -0.0251538 | 0.0321883 |
| Most | Hateful comments/total comments | 22 | 0.0074736  | 0.0117281 | -0.0213823 | 0.0363296 |
| Most | Hateful comments/total comments | 23 | 0.0159693  | 0.0103381 | -0.0094665 | 0.0414051 |
| Most | Hateful comments/total comments | 24 | 0.0039498  | 0.0159578 | -0.0353127 | 0.0432124 |
| Most | Hateful comments/total comments | 25 | 0.0133387  | 0.0126209 | -0.0177139 | 0.0443913 |
| Most | Hateful comments/total comments | 26 | 0.0063980  | 0.0123825 | -0.0240680 | 0.0368641 |
| Most | Hateful comments/total comments | 27 | 0.0128037  | 0.0183171 | -0.0322637 | 0.0578712 |
| Most | Hateful comments/total comments | 28 | 0.0142458  | 0.0253868 | -0.0482159 | 0.0767075 |
| Most | Hateful comments/total comments | 29 | 0.0159176  | 0.0184671 | -0.0295190 | 0.0613542 |
| Most | Hateful comments/total comments | 30 | -0.0014651 | 0.0217720 | -0.0550331 | 0.0521029 |

| sample | outcome                         | event.time | estimate   | std.error | conf.low   | conf.high |
|--------|---------------------------------|------------|------------|-----------|------------|-----------|
| Middle | Hateful comments/total comments | -30        | 0.0049144  | 0.0025562 | -0.0009791 | 0.0108079 |
| Middle | Hateful comments/total comments | -29        | 0.0034186  | 0.0016545 | -0.0003960 | 0.0072331 |
| Middle | Hateful comments/total comments | -28        | -0.0027860 | 0.0044421 | -0.0130274 | 0.0074553 |
| Middle | Hateful comments/total comments | -27        | 0.0024673  | 0.0042742 | -0.0073870 | 0.0123216 |
| Middle | Hateful comments/total comments | -26        | -0.0027605 | 0.0100166 | -0.0258541 | 0.0203332 |
| Middle | Hateful comments/total comments | -25        | -0.0007252 | 0.0112281 | -0.0266120 | 0.0251615 |
| Middle | Hateful comments/total comments | -24        | 0.0031775  | 0.0040573 | -0.0061767 | 0.0125317 |
| Middle | Hateful comments/total comments | -23        | -0.0083575 | 0.0042001 | -0.0180409 | 0.0013260 |
| Middle | Hateful comments/total comments | -22        | 0.0057189  | 0.0226483 | -0.0464973 | 0.0579351 |
| Middle | Hateful comments/total comments | -21        | -0.0042598 | 0.0226768 | -0.0565419 | 0.0480223 |
| Middle | Hateful comments/total comments | -20        | 0.0082579  | 0.0038551 | -0.0006301 | 0.0171459 |
| Middle | Hateful comments/total comments | -19        | -0.0116338 | 0.0272130 | -0.0743743 | 0.0511067 |
| Middle | Hateful comments/total comments | -18        | 0.0055557  | 0.0291079 | -0.0615534 | 0.0726648 |
| Middle | Hateful comments/total comments | -17        | 0.0078817  | 0.0072330 | -0.0087943 | 0.0245576 |
| Middle | Hateful comments/total comments | -16        | -0.0029543 | 0.0033183 | -0.0106048 | 0.0046962 |
| Middle | Hateful comments/total comments | -15        | 0.0014511  | 0.0030965 | -0.0056880 | 0.0085902 |



|        |                                 |     |            |           |            |            |
|--------|---------------------------------|-----|------------|-----------|------------|------------|
| Middle | Hateful comments/total comments | -14 | -0.0083631 | 0.0015630 | -0.0119666 | -0.0047597 |
| Middle | Hateful comments/total comments | -13 | 0.0061826  | 0.0048366 | -0.0049684 | 0.0173336  |
| Middle | Hateful comments/total comments | -12 | -0.0081997 | 0.0052563 | -0.0203183 | 0.0039189  |
| Middle | Hateful comments/total comments | -11 | 0.0021745  | 0.0047005 | -0.0086626 | 0.0130116  |
| Middle | Hateful comments/total comments | -10 | 0.0054016  | 0.0050134 | -0.0061568 | 0.0169601  |
| Middle | Hateful comments/total comments | -9  | 0.0011664  | 0.0161245 | -0.0360092 | 0.0383420  |
| Middle | Hateful comments/total comments | -8  | -0.0016846 | 0.0181267 | -0.0434761 | 0.0401070  |
| Middle | Hateful comments/total comments | -7  | -0.0024989 | 0.0186504 | -0.0454981 | 0.0405002  |
| Middle | Hateful comments/total comments | -6  | 0.0013417  | 0.0150332 | -0.0333179 | 0.0360013  |
| Middle | Hateful comments/total comments | -5  | -0.0072764 | 0.0091231 | -0.0283100 | 0.0137573  |
| Middle | Hateful comments/total comments | -4  | 0.0043262  | 0.0057634 | -0.0089616 | 0.0176140  |
| Middle | Hateful comments/total comments | -3  | -0.0041490 | 0.0059252 | -0.0178097 | 0.0095118  |
| Middle | Hateful comments/total comments | -2  | 0.0031212  | 0.0049543 | -0.0083011 | 0.0145435  |
| Middle | Hateful comments/total comments | -1  | 0.0026250  | 0.0033364 | -0.0050671 | 0.0103171  |
| Middle | Hateful comments/total comments | 0   | 0.0041099  | 0.0035094 | -0.0039812 | 0.0122010  |
| Middle | Hateful comments/total comments | 1   | 0.0001100  | 0.0041350 | -0.0094233 | 0.0096433  |
| Middle | Hateful comments/total comments | 2   | -0.0015597 | 0.0025077 | -0.0073414 | 0.0042220  |
| Middle | Hateful comments/total comments | 3   | 0.0014670  | 0.0031411 | -0.0057749 | 0.0087090  |
| Middle | Hateful comments/total comments | 4   | -0.0007175 | 0.0037879 | -0.0094506 | 0.0080156  |
| Middle | Hateful comments/total comments | 5   | 0.0013737  | 0.0035536 | -0.0068191 | 0.0095665  |
| Middle | Hateful comments/total comments | 6   | 0.0011229  | 0.0058861 | -0.0124477 | 0.0146935  |
| Middle | Hateful comments/total comments | 7   | 0.0030636  | 0.0034094 | -0.0047970 | 0.0109242  |
| Middle | Hateful comments/total comments | 8   | 0.0026775  | 0.0040314 | -0.0066170 | 0.0119719  |
| Middle | Hateful comments/total comments | 9   | 0.0031089  | 0.0029132 | -0.0036075 | 0.0098254  |
| Middle | Hateful comments/total comments | 10  | -0.0012128 | 0.0024660 | -0.0068981 | 0.0044726  |
| Middle | Hateful comments/total comments | 11  | 0.0028598  | 0.0098386 | -0.0198233 | 0.0255429  |
| Middle | Hateful comments/total comments | 12  | 0.0060595  | 0.0047071 | -0.0047928 | 0.0169118  |
| Middle | Hateful comments/total comments | 13  | -0.0005038 | 0.0045681 | -0.0110358 | 0.0100281  |
| Middle | Hateful comments/total comments | 14  | 0.0091818  | 0.0063194 | -0.0053879 | 0.0237514  |
| Middle | Hateful comments/total comments | 15  | 0.0090943  | 0.0087360 | -0.0110469 | 0.0292355  |
| Middle | Hateful comments/total comments | 16  | 0.0083777  | 0.0082801 | -0.0107124 | 0.0274678  |
| Middle | Hateful comments/total comments | 17  | 0.0089581  | 0.0096212 | -0.0132239 | 0.0311401  |
| Middle | Hateful comments/total comments | 18  | 0.0117397  | 0.0103528 | -0.0121289 | 0.0356083  |
| Middle | Hateful comments/total comments | 19  | 0.0117839  | 0.0098741 | -0.0109810 | 0.0345489  |
| Middle | Hateful comments/total comments | 20  | 0.0114712  | 0.0082758 | -0.0076089 | 0.0305512  |
| Middle | Hateful comments/total comments | 21  | 0.0114440  | 0.0083051 | -0.0077036 | 0.0305917  |
| Middle | Hateful comments/total comments | 22  | 0.0123520  | 0.0123954 | -0.0162260 | 0.0409300  |
| Middle | Hateful comments/total comments | 23  | 0.0034222  | 0.0084599 | -0.0160824 | 0.0229268  |
| Middle | Hateful comments/total comments | 24  | 0.0058546  | 0.0202830 | -0.0409084 | 0.0526176  |
| Middle | Hateful comments/total comments | 25  | 0.0112842  | 0.0088911 | -0.0092146 | 0.0317830  |
| Middle | Hateful comments/total comments | 26  | 0.0083498  | 0.0100345 | -0.0147851 | 0.0314848  |

|        |                                 |    |            |           |            |           |
|--------|---------------------------------|----|------------|-----------|------------|-----------|
| Middle | Hateful comments/total comments | 27 | -0.0030809 | 0.0187913 | -0.0464048 | 0.0402429 |
| Middle | Hateful comments/total comments | 28 | 0.0167782  | 0.0317398 | -0.0563989 | 0.0899553 |
| Middle | Hateful comments/total comments | 29 | 0.0031599  | 0.0211621 | -0.0456299 | 0.0519498 |
| Middle | Hateful comments/total comments | 30 | 0.0037906  | 0.0183496 | -0.0385149 | 0.0460960 |

| sample | outcome                         | event.time | estimate   | std.error | conf.low   | conf.high |
|--------|---------------------------------|------------|------------|-----------|------------|-----------|
| Least  | Hateful comments/total comments | -30        | -0.0015522 | 0.0026674 | -0.0082563 | 0.0051520 |
| Least  | Hateful comments/total comments | -29        | -0.0054694 | 0.0040325 | -0.0156047 | 0.0046659 |
| Least  | Hateful comments/total comments | -28        | 0.0002307  | 0.0045402 | -0.0111806 | 0.0116419 |
| Least  | Hateful comments/total comments | -27        | 0.0053059  | 0.0045258 | -0.0060692 | 0.0166810 |
| Least  | Hateful comments/total comments | -26        | -0.0021316 | 0.0103083 | -0.0280405 | 0.0237774 |
| Least  | Hateful comments/total comments | -25        | 0.0038728  | 0.0105259 | -0.0225829 | 0.0303285 |
| Least  | Hateful comments/total comments | -24        | -0.0004862 | 0.0006681 | -0.0021653 | 0.0011929 |
| Least  | Hateful comments/total comments | -23        | -0.0000268 | 0.0016710 | -0.0042267 | 0.0041732 |
| Least  | Hateful comments/total comments | -22        | -0.0086211 | 0.0211676 | -0.0618237 | 0.0445815 |
| Least  | Hateful comments/total comments | -21        | 0.0044431  | 0.0218472 | -0.0504675 | 0.0593537 |
| Least  | Hateful comments/total comments | -20        | 0.0046798  | 0.0019700 | -0.0002716 | 0.0096311 |
| Least  | Hateful comments/total comments | -19        | 0.0051828  | 0.0339167 | -0.0800634 | 0.0904290 |
| Least  | Hateful comments/total comments | -18        | -0.0067876 | 0.0305284 | -0.0835176 | 0.0699424 |
| Least  | Hateful comments/total comments | -17        | 0.0026729  | 0.0075866 | -0.0163952 | 0.0217411 |
| Least  | Hateful comments/total comments | -16        | -0.0010394 | 0.0023895 | -0.0070452 | 0.0049664 |
| Least  | Hateful comments/total comments | -15        | 0.0009084  | 0.0030039 | -0.0066416 | 0.0084584 |
| Least  | Hateful comments/total comments | -14        | 0.0062608  | 0.0023499 | 0.0003546  | 0.0121671 |
| Least  | Hateful comments/total comments | -13        | -0.0117908 | 0.0063997 | -0.0278757 | 0.0042942 |
| Least  | Hateful comments/total comments | -12        | 0.0063750  | 0.0047593 | -0.0055870 | 0.0183369 |
| Least  | Hateful comments/total comments | -11        | -0.0012030 | 0.0026549 | -0.0078757 | 0.0054697 |
| Least  | Hateful comments/total comments | -10        | 0.0000367  | 0.0047736 | -0.0119613 | 0.0120346 |
| Least  | Hateful comments/total comments | -9         | 0.0009258  | 0.0152258 | -0.0373428 | 0.0391945 |
| Least  | Hateful comments/total comments | -8         | -0.0047434 | 0.0210672 | -0.0576936 | 0.0482068 |
| Least  | Hateful comments/total comments | -7         | -0.0006271 | 0.0204571 | -0.0520440 | 0.0507899 |
| Least  | Hateful comments/total comments | -6         | 0.0003417  | 0.0158870 | -0.0395888 | 0.0402721 |
| Least  | Hateful comments/total comments | -5         | 0.0046705  | 0.0089949 | -0.0179374 | 0.0272784 |
| Least  | Hateful comments/total comments | -4         | -0.0043404 | 0.0067318 | -0.0212600 | 0.0125792 |
| Least  | Hateful comments/total comments | -3         | -0.0035113 | 0.0050407 | -0.0161805 | 0.0091580 |
| Least  | Hateful comments/total comments | -2         | 0.0020329  | 0.0043947 | -0.0090127 | 0.0130785 |
| Least  | Hateful comments/total comments | -1         | 0.0011980  | 0.0030593 | -0.0064913 | 0.0088873 |
| Least  | Hateful comments/total comments | 0          | -0.0029234 | 0.0045476 | -0.0143534 | 0.0085066 |
| Least  | Hateful comments/total comments | 1          | 0.0018903  | 0.0031847 | -0.0061142 | 0.0098947 |
| Least  | Hateful comments/total comments | 2          | 0.0032874  | 0.0032037 | -0.0047646 | 0.0113395 |
| Least  | Hateful comments/total comments | 3          | 0.0015005  | 0.0033563 | -0.0069353 | 0.0099363 |
| Least  | Hateful comments/total comments | 4          | 0.0017373  | 0.0059157 | -0.0131313 | 0.0166060 |

|       |                                 |    |            |           |            |           |
|-------|---------------------------------|----|------------|-----------|------------|-----------|
| Least | Hateful comments/total comments | 5  | 0.0035360  | 0.0027980 | -0.0034966 | 0.0105685 |
| Least | Hateful comments/total comments | 6  | 0.0044708  | 0.0061440 | -0.0109717 | 0.0199132 |
| Least | Hateful comments/total comments | 7  | 0.0029757  | 0.0038523 | -0.0067065 | 0.0126580 |
| Least | Hateful comments/total comments | 8  | 0.0031916  | 0.0029935 | -0.0043322 | 0.0107154 |
| Least | Hateful comments/total comments | 9  | 0.0010836  | 0.0042584 | -0.0096193 | 0.0117866 |
| Least | Hateful comments/total comments | 10 | 0.0059012  | 0.0040659 | -0.0043180 | 0.0161203 |
| Least | Hateful comments/total comments | 11 | 0.0058102  | 0.0118267 | -0.0239149 | 0.0355353 |
| Least | Hateful comments/total comments | 12 | 0.0080608  | 0.0033393 | -0.0003323 | 0.0164538 |
| Least | Hateful comments/total comments | 13 | 0.0018597  | 0.0044235 | -0.0092583 | 0.0129776 |
| Least | Hateful comments/total comments | 14 | 0.0105173  | 0.0099083 | -0.0143863 | 0.0354210 |
| Least | Hateful comments/total comments | 15 | 0.0024181  | 0.0077938 | -0.0171707 | 0.0220069 |
| Least | Hateful comments/total comments | 16 | 0.0051456  | 0.0067206 | -0.0117459 | 0.0220370 |
| Least | Hateful comments/total comments | 17 | 0.0034278  | 0.0093532 | -0.0200804 | 0.0269361 |
| Least | Hateful comments/total comments | 18 | 0.0063356  | 0.0096046 | -0.0178045 | 0.0304758 |
| Least | Hateful comments/total comments | 19 | 0.0006260  | 0.0097816 | -0.0239592 | 0.0252112 |
| Least | Hateful comments/total comments | 20 | 0.0050559  | 0.0078619 | -0.0147042 | 0.0248159 |
| Least | Hateful comments/total comments | 21 | 0.0061184  | 0.0096975 | -0.0182553 | 0.0304921 |
| Least | Hateful comments/total comments | 22 | 0.0094057  | 0.0086989 | -0.0124582 | 0.0312697 |
| Least | Hateful comments/total comments | 23 | 0.0053943  | 0.0091167 | -0.0175197 | 0.0283083 |
| Least | Hateful comments/total comments | 24 | 0.0095337  | 0.0211305 | -0.0435758 | 0.0626432 |
| Least | Hateful comments/total comments | 25 | 0.0029702  | 0.0085182 | -0.0184396 | 0.0243799 |
| Least | Hateful comments/total comments | 26 | 0.0070124  | 0.0110228 | -0.0206923 | 0.0347172 |
| Least | Hateful comments/total comments | 27 | 0.0029123  | 0.0233858 | -0.0558656 | 0.0616902 |
| Least | Hateful comments/total comments | 28 | 0.0064112  | 0.0265969 | -0.0604375 | 0.0732599 |
| Least | Hateful comments/total comments | 29 | -0.0027665 | 0.0237356 | -0.0624235 | 0.0568905 |
| Least | Hateful comments/total comments | 30 | 0.0007955  | 0.0224925 | -0.0557371 | 0.0573281 |

## Audience outdegree

Average effect by length of exposure (Callaway and Sant'Anna)

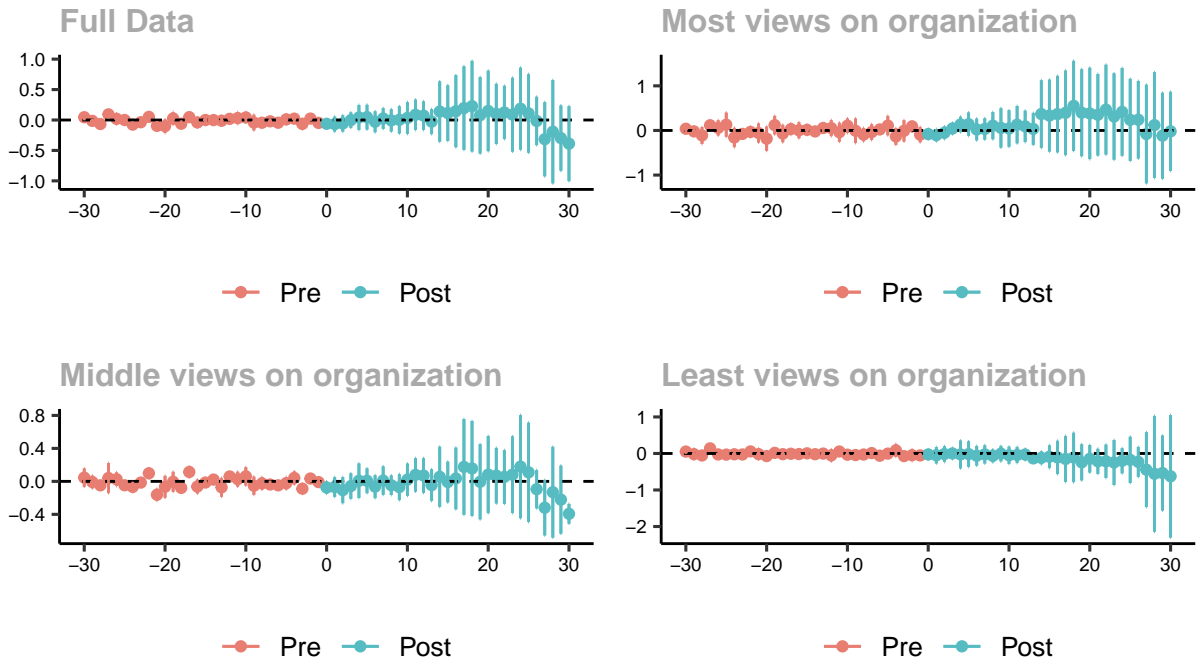

Long timeframe with sampled control groups

| sample | outcome            | event.time | estimate   | std.error | conf.low   | conf.high  |
|--------|--------------------|------------|------------|-----------|------------|------------|
| Full   | Audience outdegree | -30        | 0.0454893  | 0.0198107 | -0.0054302 | 0.0964088  |
| Full   | Audience outdegree | -29        | -0.0142792 | 0.0121135 | -0.0454144 | 0.0168560  |
| Full   | Audience outdegree | -28        | -0.0657547 | 0.0233416 | -0.1257495 | -0.0057599 |
| Full   | Audience outdegree | -27        | 0.0923012  | 0.0265647 | 0.0240221  | 0.1605802  |
| Full   | Audience outdegree | -26        | 0.0193271  | 0.0354152 | -0.0717004 | 0.1103547  |
| Full   | Audience outdegree | -25        | -0.0001636 | 0.0285131 | -0.0734507 | 0.0731236  |
| Full   | Audience outdegree | -24        | -0.0759758 | 0.0204334 | -0.1284956 | -0.0234560 |
| Full   | Audience outdegree | -23        | -0.0367684 | 0.0185293 | -0.0843942 | 0.0108574  |
| Full   | Audience outdegree | -22        | 0.0514007  | 0.0236711 | -0.0094411 | 0.1122424  |
| Full   | Audience outdegree | -21        | -0.0954589 | 0.0306626 | -0.1742709 | -0.0166469 |
| Full   | Audience outdegree | -20        | -0.1011317 | 0.0432966 | -0.2124167 | 0.0101534  |
| Full   | Audience outdegree | -19        | 0.0255991  | 0.0404962 | -0.0784881 | 0.1296863  |
| Full   | Audience outdegree | -18        | -0.0613446 | 0.0219741 | -0.1178245 | -0.0048647 |
| Full   | Audience outdegree | -17        | 0.0463794  | 0.0156846 | 0.0060654  | 0.0866934  |
| Full   | Audience outdegree | -16        | -0.0399039 | 0.0322672 | -0.1228403 | 0.0430324  |
| Full   | Audience outdegree | -15        | -0.0001980 | 0.0165811 | -0.0428162 | 0.0424203  |
| Full   | Audience outdegree | -14        | -0.0014071 | 0.0083108 | -0.0227684 | 0.0199542  |
| Full   | Audience outdegree | -13        | -0.0121237 | 0.0308543 | -0.0914284 | 0.0671810  |
| Full   | Audience outdegree | -12        | 0.0193877  | 0.0154464 | -0.0203142 | 0.0590897  |

|      |                    |     |            |           |            |           |
|------|--------------------|-----|------------|-----------|------------|-----------|
| Full | Audience outdegree | -11 | 0.0310062  | 0.0380175 | -0.0667100 | 0.1287223 |
| Full | Audience outdegree | -10 | 0.0422564  | 0.0328900 | -0.0422807 | 0.1267935 |
| Full | Audience outdegree | -9  | -0.0420161 | 0.0499040 | -0.1702842 | 0.0862520 |
| Full | Audience outdegree | -8  | -0.0452061 | 0.0248394 | -0.1090508 | 0.0186385 |
| Full | Audience outdegree | -7  | -0.0215958 | 0.0187905 | -0.0698930 | 0.0267014 |
| Full | Audience outdegree | -6  | -0.0447400 | 0.0248005 | -0.1084846 | 0.0190046 |
| Full | Audience outdegree | -5  | 0.0102945  | 0.0326377 | -0.0735940 | 0.0941829 |
| Full | Audience outdegree | -4  | 0.0217811  | 0.0245954 | -0.0414364 | 0.0849985 |
| Full | Audience outdegree | -3  | -0.0646509 | 0.0334383 | -0.1505973 | 0.0212955 |
| Full | Audience outdegree | -2  | 0.0234508  | 0.0136630 | -0.0116673 | 0.0585688 |
| Full | Audience outdegree | -1  | -0.0477172 | 0.0295512 | -0.1236726 | 0.0282382 |
| Full | Audience outdegree | 0   | -0.0624038 | 0.0265619 | -0.1306757 | 0.0058682 |
| Full | Audience outdegree | 1   | -0.0677017 | 0.0478300 | -0.1906390 | 0.0552356 |
| Full | Audience outdegree | 2   | -0.0567903 | 0.0520347 | -0.1905350 | 0.0769543 |
| Full | Audience outdegree | 3   | -0.0021213 | 0.0497313 | -0.1299454 | 0.1257028 |
| Full | Audience outdegree | 4   | 0.0420534  | 0.0797840 | -0.1630151 | 0.2471220 |
| Full | Audience outdegree | 5   | 0.0472792  | 0.0789258 | -0.1555833 | 0.2501418 |
| Full | Audience outdegree | 6   | -0.0290921 | 0.0667681 | -0.2007060 | 0.1425218 |
| Full | Audience outdegree | 7   | 0.0244027  | 0.0659399 | -0.1450823 | 0.1938878 |
| Full | Audience outdegree | 8   | -0.0059371 | 0.0714399 | -0.1895587 | 0.1776846 |
| Full | Audience outdegree | 9   | 0.0028585  | 0.0871811 | -0.2212227 | 0.2269397 |
| Full | Audience outdegree | 10  | 0.0332059  | 0.1013539 | -0.2273036 | 0.2937153 |
| Full | Audience outdegree | 11  | 0.0855531  | 0.0969402 | -0.1636120 | 0.3347182 |
| Full | Audience outdegree | 12  | 0.0715055  | 0.0916798 | -0.1641386 | 0.3071497 |
| Full | Audience outdegree | 13  | -0.0258076 | 0.0800727 | -0.2316181 | 0.1800030 |
| Full | Audience outdegree | 14  | 0.1389174  | 0.1924979 | -0.3558592 | 0.6336939 |
| Full | Audience outdegree | 15  | 0.1133797  | 0.1778244 | -0.3436816 | 0.5704411 |
| Full | Audience outdegree | 16  | 0.1444892  | 0.2301507 | -0.4470663 | 0.7360447 |
| Full | Audience outdegree | 17  | 0.1959869  | 0.2669644 | -0.4901907 | 0.8821646 |
| Full | Audience outdegree | 18  | 0.2269513  | 0.2896449 | -0.5175218 | 0.9714244 |
| Full | Audience outdegree | 19  | 0.0777383  | 0.2442162 | -0.5499697 | 0.7054464 |
| Full | Audience outdegree | 20  | 0.1490290  | 0.2572504 | -0.5121806 | 0.8102387 |
| Full | Audience outdegree | 21  | 0.1004270  | 0.1921785 | -0.3935286 | 0.5943826 |
| Full | Audience outdegree | 22  | 0.1238578  | 0.1702188 | -0.3136549 | 0.5613704 |
| Full | Audience outdegree | 23  | 0.0877876  | 0.2358256 | -0.5183541 | 0.6939293 |
| Full | Audience outdegree | 24  | 0.1852983  | 0.2623522 | -0.4890247 | 0.8596212 |
| Full | Audience outdegree | 25  | 0.1087450  | 0.2512588 | -0.5370646 | 0.7545547 |
| Full | Audience outdegree | 26  | -0.0157994 | 0.1545046 | -0.4129220 | 0.3813232 |
| Full | Audience outdegree | 27  | -0.3151135 | 0.2371603 | -0.9246856 | 0.2944586 |
| Full | Audience outdegree | 28  | -0.1926860 | 0.3297605 | -1.0402683 | 0.6548963 |
| Full | Audience outdegree | 29  | -0.2973863 | 0.2086363 | -0.8336433 | 0.2388708 |

|      |                    |    |            |           |            |           |
|------|--------------------|----|------------|-----------|------------|-----------|
| Full | Audience outdegree | 30 | -0.3887757 | 0.2394701 | -1.0042849 | 0.2267335 |
|------|--------------------|----|------------|-----------|------------|-----------|

| sample | outcome            | event.time | estimate   | std.error | conf.low   | conf.high  |
|--------|--------------------|------------|------------|-----------|------------|------------|
| Most   | Audience outdegree | -30        | 0.0374666  | 0.0350777 | -0.0481753 | 0.1231085  |
| Most   | Audience outdegree | -29        | -0.0199617 | 0.0415948 | -0.1215149 | 0.0815914  |
| Most   | Audience outdegree | -28        | -0.1112993 | 0.0770717 | -0.2994691 | 0.0768705  |
| Most   | Audience outdegree | -27        | 0.1159938  | 0.0330296 | 0.0353524  | 0.1966352  |
| Most   | Audience outdegree | -26        | 0.0574997  | 0.0695826 | -0.1123855 | 0.2273849  |
| Most   | Audience outdegree | -25        | 0.1294529  | 0.1103560 | -0.1399800 | 0.3988858  |
| Most   | Audience outdegree | -24        | -0.1573009 | 0.0885997 | -0.3736162 | 0.0590143  |
| Most   | Audience outdegree | -23        | -0.0775796 | 0.0278092 | -0.1454753 | -0.0096838 |
| Most   | Audience outdegree | -22        | -0.0329570 | 0.0476648 | -0.1493302 | 0.0834161  |
| Most   | Audience outdegree | -21        | -0.0572402 | 0.0868299 | -0.2692345 | 0.1547541  |
| Most   | Audience outdegree | -20        | -0.1844609 | 0.1106836 | -0.4546937 | 0.0857719  |
| Most   | Audience outdegree | -19        | 0.1189369  | 0.0847671 | -0.0880211 | 0.3258948  |
| Most   | Audience outdegree | -18        | -0.0691208 | 0.0800447 | -0.2645491 | 0.1263075  |
| Most   | Audience outdegree | -17        | 0.0308013  | 0.0529295 | -0.0984255 | 0.1600281  |
| Most   | Audience outdegree | -16        | 0.0038292  | 0.0730882 | -0.1746147 | 0.1822731  |
| Most   | Audience outdegree | -15        | 0.0133364  | 0.0468480 | -0.1010424 | 0.1277151  |
| Most   | Audience outdegree | -14        | -0.0221902 | 0.0277570 | -0.0899586 | 0.0455782  |
| Most   | Audience outdegree | -13        | 0.0551327  | 0.0384804 | -0.0388167 | 0.1490822  |
| Most   | Audience outdegree | -12        | 0.0522570  | 0.0733108 | -0.1267305 | 0.2312446  |
| Most   | Audience outdegree | -11        | -0.0385962 | 0.0870713 | -0.2511798 | 0.1739873  |
| Most   | Audience outdegree | -10        | 0.1059086  | 0.0667287 | -0.0570089 | 0.2688260  |
| Most   | Audience outdegree | -9         | -0.0074360 | 0.1122745 | -0.2815530 | 0.2666810  |
| Most   | Audience outdegree | -8         | -0.0931081 | 0.0613215 | -0.2428239 | 0.0566076  |
| Most   | Audience outdegree | -7         | -0.0370810 | 0.0728424 | -0.2149248 | 0.1407628  |
| Most   | Audience outdegree | -6         | 0.0219846  | 0.0231949 | -0.0346455 | 0.0786146  |
| Most   | Audience outdegree | -5         | 0.1082253  | 0.0889239 | -0.1088814 | 0.3253319  |
| Most   | Audience outdegree | -4         | -0.1342821 | 0.0768733 | -0.3219675 | 0.0534032  |
| Most   | Audience outdegree | -3         | -0.0088757 | 0.0974805 | -0.2468733 | 0.2291219  |
| Most   | Audience outdegree | -2         | 0.0917177  | 0.0433972 | -0.0142359 | 0.1976714  |
| Most   | Audience outdegree | -1         | -0.0937300 | 0.0702139 | -0.2651564 | 0.0776965  |
| Most   | Audience outdegree | 0          | -0.0809421 | 0.0479636 | -0.1980446 | 0.0361605  |
| Most   | Audience outdegree | 1          | -0.1055935 | 0.0563340 | -0.2431323 | 0.0319454  |
| Most   | Audience outdegree | 2          | -0.0524753 | 0.0583986 | -0.1950547 | 0.0901042  |
| Most   | Audience outdegree | 3          | 0.0443072  | 0.0526727 | -0.0842925 | 0.1729069  |
| Most   | Audience outdegree | 4          | 0.1345987  | 0.0708906 | -0.0384800 | 0.3076773  |
| Most   | Audience outdegree | 5          | 0.1405000  | 0.1071038 | -0.1209928 | 0.4019928  |
| Most   | Audience outdegree | 6          | 0.0222440  | 0.1000731 | -0.2220834 | 0.2665713  |
| Most   | Audience outdegree | 7          | 0.0341691  | 0.0976627 | -0.2042734 | 0.2726116  |

|      |                    |    |            |           |            |           |
|------|--------------------|----|------------|-----------|------------|-----------|
| Most | Audience outdegree | 8  | 0.1074787  | 0.1250214 | -0.1977596 | 0.4127169 |
| Most | Audience outdegree | 9  | 0.0576665  | 0.1803372 | -0.3826249 | 0.4979578 |
| Most | Audience outdegree | 10 | 0.0439843  | 0.1671203 | -0.3640381 | 0.4520066 |
| Most | Audience outdegree | 11 | 0.1293982  | 0.1711318 | -0.2884182 | 0.5472147 |
| Most | Audience outdegree | 12 | 0.0915993  | 0.1440093 | -0.2599979 | 0.4431965 |
| Most | Audience outdegree | 13 | 0.0350636  | 0.1464160 | -0.3224095 | 0.3925366 |
| Most | Audience outdegree | 14 | 0.3677709  | 0.3099829 | -0.3890489 | 1.1245907 |
| Most | Audience outdegree | 15 | 0.3329108  | 0.3296273 | -0.4718706 | 1.1376922 |
| Most | Audience outdegree | 16 | 0.3664336  | 0.3508957 | -0.4902743 | 1.2231415 |
| Most | Audience outdegree | 17 | 0.3943415  | 0.3879518 | -0.5528385 | 1.3415214 |
| Most | Audience outdegree | 18 | 0.5507317  | 0.4131166 | -0.4578880 | 1.5593514 |
| Most | Audience outdegree | 19 | 0.3972862  | 0.3993116 | -0.5776287 | 1.3722011 |
| Most | Audience outdegree | 20 | 0.3814577  | 0.4193658 | -0.6424193 | 1.4053348 |
| Most | Audience outdegree | 21 | 0.3510564  | 0.3740078 | -0.5620794 | 1.2641923 |
| Most | Audience outdegree | 22 | 0.4670342  | 0.4120654 | -0.5390188 | 1.4730873 |
| Most | Audience outdegree | 23 | 0.3123455  | 0.3961544 | -0.6548610 | 1.2795520 |
| Most | Audience outdegree | 24 | 0.4163685  | 0.4023558 | -0.5659788 | 1.3987159 |
| Most | Audience outdegree | 25 | 0.2380787  | 0.3763102 | -0.6806785 | 1.1568360 |
| Most | Audience outdegree | 26 | 0.2405029  | 0.3556708 | -0.6278635 | 1.1088693 |
| Most | Audience outdegree | 27 | -0.0797681 | 0.4525214 | -1.1845940 | 1.0250578 |
| Most | Audience outdegree | 28 | 0.1195968  | 0.4854414 | -1.0656030 | 1.3047967 |
| Most | Audience outdegree | 29 | -0.1167266 | 0.3939125 | -1.0784598 | 0.8450065 |
| Most | Audience outdegree | 30 | -0.0198832 | 0.3627148 | -0.9054472 | 0.8656809 |

| sample | outcome            | event.time | estimate   | std.error | conf.low   | conf.high  |
|--------|--------------------|------------|------------|-----------|------------|------------|
| Middle | Audience outdegree | -30        | 0.0455140  | 0.0433439 | -0.0646295 | 0.1556575  |
| Middle | Audience outdegree | -29        | -0.0075411 | 0.0303535 | -0.0846739 | 0.0695917  |
| Middle | Audience outdegree | -28        | -0.0481477 | 0.0184742 | -0.0950935 | -0.0012019 |
| Middle | Audience outdegree | -27        | 0.0404802  | 0.0719361 | -0.1423203 | 0.2232807  |
| Middle | Audience outdegree | -26        | 0.0263188  | 0.0324713 | -0.0561958 | 0.1088334  |
| Middle | Audience outdegree | -25        | -0.0475502 | 0.0183920 | -0.0942870 | -0.0008134 |
| Middle | Audience outdegree | -24        | -0.0672510 | 0.0248027 | -0.1302785 | -0.0042236 |
| Middle | Audience outdegree | -23        | -0.0146492 | 0.0157142 | -0.0545813 | 0.0252829  |
| Middle | Audience outdegree | -22        | 0.0980264  | 0.0237898 | 0.0375728  | 0.1584799  |
| Middle | Audience outdegree | -21        | -0.1621467 | 0.0284420 | -0.2344222 | -0.0898713 |
| Middle | Audience outdegree | -20        | -0.0656040 | 0.0520646 | -0.1979081 | 0.0667001  |
| Middle | Audience outdegree | -19        | -0.0051644 | 0.0476588 | -0.1262726 | 0.1159439  |
| Middle | Audience outdegree | -18        | -0.0789599 | 0.0119454 | -0.1093149 | -0.0486048 |
| Middle | Audience outdegree | -17        | 0.1139553  | 0.0258763 | 0.0481997  | 0.1797108  |
| Middle | Audience outdegree | -16        | -0.0631111 | 0.0331409 | -0.1473272 | 0.0211049  |
| Middle | Audience outdegree | -15        | -0.0140530 | 0.0142719 | -0.0503202 | 0.0222142  |

|        |                    |     |            |           |            |            |
|--------|--------------------|-----|------------|-----------|------------|------------|
| Middle | Audience outdegree | -14 | 0.0216367  | 0.0124546 | -0.0100123 | 0.0532857  |
| Middle | Audience outdegree | -13 | -0.0718232 | 0.0447545 | -0.1855512 | 0.0419048  |
| Middle | Audience outdegree | -12 | 0.0592659  | 0.0165336 | 0.0172514  | 0.1012804  |
| Middle | Audience outdegree | -11 | 0.0264644  | 0.0355916 | -0.0639791 | 0.1169080  |
| Middle | Audience outdegree | -10 | 0.0606023  | 0.0434056 | -0.0496977 | 0.1709024  |
| Middle | Audience outdegree | -9  | -0.0528041 | 0.0432297 | -0.1626573 | 0.0570491  |
| Middle | Audience outdegree | -8  | -0.0245315 | 0.0299855 | -0.1007293 | 0.0516662  |
| Middle | Audience outdegree | -7  | -0.0380233 | 0.0191827 | -0.0867694 | 0.0107228  |
| Middle | Audience outdegree | -6  | -0.0479809 | 0.0176474 | -0.0928258 | -0.0031361 |
| Middle | Audience outdegree | -5  | -0.0225566 | 0.0297930 | -0.0982652 | 0.0531519  |
| Middle | Audience outdegree | -4  | 0.0415555  | 0.0312286 | -0.0378010 | 0.1209120  |
| Middle | Audience outdegree | -3  | -0.0889519 | 0.0237447 | -0.1492907 | -0.0286131 |
| Middle | Audience outdegree | -2  | 0.0343189  | 0.0187514 | -0.0133314 | 0.0819691  |
| Middle | Audience outdegree | -1  | -0.0089071 | 0.0140324 | -0.0445656 | 0.0267514  |
| Middle | Audience outdegree | 0   | -0.0749303 | 0.0293079 | -0.1494061 | -0.0004545 |
| Middle | Audience outdegree | 1   | -0.0690060 | 0.0468588 | -0.1880813 | 0.0500693  |
| Middle | Audience outdegree | 2   | -0.1063507 | 0.0622668 | -0.2645800 | 0.0518786  |
| Middle | Audience outdegree | 3   | -0.0571145 | 0.0610373 | -0.2122195 | 0.0979905  |
| Middle | Audience outdegree | 4   | 0.0075682  | 0.0822452 | -0.2014293 | 0.2165657  |
| Middle | Audience outdegree | 5   | 0.0073067  | 0.0590082 | -0.1426422 | 0.1572556  |
| Middle | Audience outdegree | 6   | -0.0640521 | 0.0545907 | -0.2027753 | 0.0746710  |
| Middle | Audience outdegree | 7   | 0.0096751  | 0.0675520 | -0.1619846 | 0.1813349  |
| Middle | Audience outdegree | 8   | -0.0467266 | 0.0466153 | -0.1651831 | 0.0717299  |
| Middle | Audience outdegree | 9   | -0.0698553 | 0.0620182 | -0.2274528 | 0.0877422  |
| Middle | Audience outdegree | 10  | 0.0204894  | 0.0768135 | -0.1747055 | 0.2156842  |
| Middle | Audience outdegree | 11  | 0.0790583  | 0.0798770 | -0.1239213 | 0.2820380  |
| Middle | Audience outdegree | 12  | 0.0703321  | 0.0827832 | -0.1400325 | 0.2806968  |
| Middle | Audience outdegree | 13  | -0.0456160 | 0.0757388 | -0.2380798 | 0.1468478  |
| Middle | Audience outdegree | 14  | 0.0552945  | 0.1435661 | -0.3095286 | 0.4201176  |
| Middle | Audience outdegree | 15  | -0.0078969 | 0.0972219 | -0.2549525 | 0.2391587  |
| Middle | Audience outdegree | 16  | 0.0352311  | 0.1470545 | -0.3384566 | 0.4089188  |
| Middle | Audience outdegree | 17  | 0.1755061  | 0.2281907 | -0.4043609 | 0.7553731  |
| Middle | Audience outdegree | 18  | 0.1565502  | 0.2265636 | -0.4191821 | 0.7322825  |
| Middle | Audience outdegree | 19  | -0.0045308 | 0.1792947 | -0.4601456 | 0.4510840  |
| Middle | Audience outdegree | 20  | 0.0823335  | 0.1838426 | -0.3848383 | 0.5495052  |
| Middle | Audience outdegree | 21  | 0.0692887  | 0.1325244 | -0.2674757 | 0.4060532  |
| Middle | Audience outdegree | 22  | 0.0536121  | 0.1280044 | -0.2716666 | 0.3788908  |
| Middle | Audience outdegree | 23  | 0.0810433  | 0.1829698 | -0.3839108 | 0.5459974  |
| Middle | Audience outdegree | 24  | 0.1785521  | 0.2461416 | -0.4469308 | 0.8040351  |
| Middle | Audience outdegree | 25  | 0.1093083  | 0.2369019 | -0.4926952 | 0.7113118  |
| Middle | Audience outdegree | 26  | -0.0950690 | 0.0912582 | -0.3269700 | 0.1368319  |



|        |                    |    |            |           |            |            |
|--------|--------------------|----|------------|-----------|------------|------------|
| Middle | Audience outdegree | 27 | -0.3192944 | 0.1321228 | -0.6550385 | 0.0164497  |
| Middle | Audience outdegree | 28 | -0.1310895 | 0.2163468 | -0.6808595 | 0.4186805  |
| Middle | Audience outdegree | 29 | -0.2215932 | 0.1623479 | -0.6341437 | 0.1909574  |
| Middle | Audience outdegree | 30 | -0.3930700 | 0.0469743 | -0.5124388 | -0.2737012 |

| sample | outcome            | event.time | estimate   | std.error | conf.low   | conf.high  |
|--------|--------------------|------------|------------|-----------|------------|------------|
| Least  | Audience outdegree | -30        | 0.0518466  | 0.0248609 | -0.0062203 | 0.1099135  |
| Least  | Audience outdegree | -29        | -0.0186255 | 0.0634214 | -0.1667569 | 0.1295059  |
| Least  | Audience outdegree | -28        | -0.0545332 | 0.0140011 | -0.0872352 | -0.0218312 |
| Least  | Audience outdegree | -27        | 0.1398761  | 0.0188616 | 0.0958217  | 0.1839305  |
| Least  | Audience outdegree | -26        | -0.0266208 | 0.0201583 | -0.0737039 | 0.0204622  |
| Least  | Audience outdegree | -25        | -0.0309579 | 0.0247201 | -0.0886959 | 0.0267800  |
| Least  | Audience outdegree | -24        | -0.0226962 | 0.0384983 | -0.1126155 | 0.0672231  |
| Least  | Audience outdegree | -23        | -0.0276695 | 0.0412778 | -0.1240808 | 0.0687418  |
| Least  | Audience outdegree | -22        | 0.0556713  | 0.0240091 | -0.0004062 | 0.1117487  |
| Least  | Audience outdegree | -21        | -0.0184341 | 0.0652570 | -0.1708529 | 0.1339847  |
| Least  | Audience outdegree | -20        | -0.0725225 | 0.0274091 | -0.1365410 | -0.0085039 |
| Least  | Audience outdegree | -19        | 0.0164721  | 0.0485243 | -0.0968647 | 0.1298089  |
| Least  | Audience outdegree | -18        | -0.0196807 | 0.0250792 | -0.0782575 | 0.0388961  |
| Least  | Audience outdegree | -17        | -0.0082041 | 0.0152446 | -0.0438105 | 0.0274024  |
| Least  | Audience outdegree | -16        | -0.0166925 | 0.0462732 | -0.1247713 | 0.0913864  |
| Least  | Audience outdegree | -15        | 0.0027593  | 0.0130639 | -0.0277537 | 0.0332724  |
| Least  | Audience outdegree | -14        | -0.0202818 | 0.0201113 | -0.0672553 | 0.0266917  |
| Least  | Audience outdegree | -13        | -0.0032338 | 0.0288684 | -0.0706609 | 0.0641932  |
| Least  | Audience outdegree | -12        | -0.0517073 | 0.0703109 | -0.2159303 | 0.1125157  |
| Least  | Audience outdegree | -11        | 0.0535701  | 0.0316461 | -0.0203448 | 0.1274849  |
| Least  | Audience outdegree | -10        | -0.0335366 | 0.0381971 | -0.1227523 | 0.0556791  |
| Least  | Audience outdegree | -9         | -0.0431417 | 0.0454763 | -0.1493594 | 0.0630760  |
| Least  | Audience outdegree | -8         | -0.0289893 | 0.0408600 | -0.1244248 | 0.0664462  |
| Least  | Audience outdegree | -7         | 0.0105317  | 0.0218085 | -0.0404059 | 0.0614692  |
| Least  | Audience outdegree | -6         | -0.0612439 | 0.0537204 | -0.1867170 | 0.0642292  |
| Least  | Audience outdegree | -5         | -0.0041179 | 0.0254058 | -0.0634576 | 0.0552218  |
| Least  | Audience outdegree | -4         | 0.0830970  | 0.0758907 | -0.0941586 | 0.2603527  |
| Least  | Audience outdegree | -3         | -0.0723214 | 0.0397419 | -0.1651453 | 0.0205026  |
| Least  | Audience outdegree | -2         | -0.0475149 | 0.0677475 | -0.2057507 | 0.1107208  |
| Least  | Audience outdegree | -1         | -0.0537088 | 0.0293306 | -0.1222154 | 0.0147978  |
| Least  | Audience outdegree | 0          | -0.0267368 | 0.0575889 | -0.1612456 | 0.1077720  |
| Least  | Audience outdegree | 1          | -0.0492741 | 0.0952747 | -0.2718045 | 0.1732562  |
| Least  | Audience outdegree | 2          | -0.0162690 | 0.0913147 | -0.2295500 | 0.1970120  |
| Least  | Audience outdegree | 3          | 0.0003421  | 0.0654425 | -0.1525101 | 0.1531942  |
| Least  | Audience outdegree | 4          | -0.0268886 | 0.1626715 | -0.4068355 | 0.3530583  |

|       |                    |    |            |           |            |            |
|-------|--------------------|----|------------|-----------|------------|------------|
| Least | Audience outdegree | 5  | -0.0175894 | 0.1495347 | -0.3668532 | 0.3316744  |
| Least | Audience outdegree | 6  | -0.0621990 | 0.1148241 | -0.3303901 | 0.2059920  |
| Least | Audience outdegree | 7  | -0.0250436 | 0.1065996 | -0.2740252 | 0.2239379  |
| Least | Audience outdegree | 8  | -0.0649096 | 0.0754519 | -0.2411403 | 0.1113211  |
| Least | Audience outdegree | 9  | -0.0048829 | 0.0904290 | -0.2160951 | 0.2063293  |
| Least | Audience outdegree | 10 | -0.0487233 | 0.1001145 | -0.2825577 | 0.1851112  |
| Least | Audience outdegree | 11 | -0.0405186 | 0.0936936 | -0.2593561 | 0.1783188  |
| Least | Audience outdegree | 12 | -0.0298133 | 0.0672712 | -0.1869367 | 0.1273100  |
| Least | Audience outdegree | 13 | -0.1352923 | 0.0441398 | -0.2383882 | -0.0321963 |
| Least | Audience outdegree | 14 | -0.1200665 | 0.0749556 | -0.2951379 | 0.0550049  |
| Least | Audience outdegree | 15 | -0.0900541 | 0.1328294 | -0.4002996 | 0.2201914  |
| Least | Audience outdegree | 16 | -0.1087071 | 0.1952551 | -0.5647585 | 0.3473444  |
| Least | Audience outdegree | 17 | -0.1504351 | 0.2696243 | -0.7801884 | 0.4793182  |
| Least | Audience outdegree | 18 | -0.1087645 | 0.2892128 | -0.7842700 | 0.5667410  |
| Least | Audience outdegree | 19 | -0.2428675 | 0.2111186 | -0.7359710 | 0.2502359  |
| Least | Audience outdegree | 20 | -0.1456167 | 0.1608346 | -0.5212733 | 0.2300399  |
| Least | Audience outdegree | 21 | -0.2145017 | 0.1463014 | -0.5562134 | 0.1272099  |
| Least | Audience outdegree | 22 | -0.2136051 | 0.1949522 | -0.6689492 | 0.2417390  |
| Least | Audience outdegree | 23 | -0.2476906 | 0.2633820 | -0.8628639 | 0.3674828  |
| Least | Audience outdegree | 24 | -0.2008785 | 0.1468205 | -0.5438027 | 0.1420456  |
| Least | Audience outdegree | 25 | -0.1743321 | 0.2706978 | -0.8065928 | 0.4579286  |
| Least | Audience outdegree | 26 | -0.2305932 | 0.1751587 | -0.6397060 | 0.1785196  |
| Least | Audience outdegree | 27 | -0.4431228 | 0.4383555 | -1.4669766 | 0.5807309  |
| Least | Audience outdegree | 28 | -0.5562855 | 0.6782105 | -2.1403612 | 1.0277902  |
| Least | Audience outdegree | 29 | -0.5358466 | 0.4390698 | -1.5613687 | 0.4896755  |
| Least | Audience outdegree | 30 | -0.6250028 | 0.7176262 | -2.3011407 | 1.0511351  |

## Audience indegree

Average effect by length of exposure (Callaway and Sant'Anna)

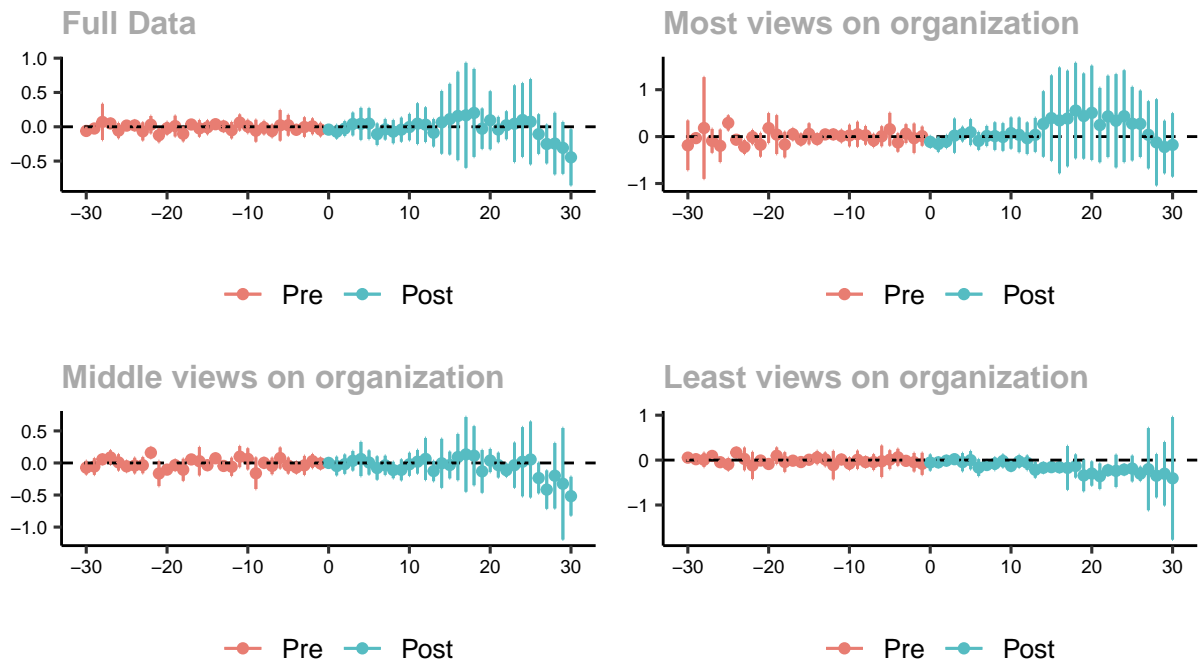

Long timeframe with sampled control groups

| sample | outcome           | event.time | estimate   | std.error | conf.low   | conf.high  |
|--------|-------------------|------------|------------|-----------|------------|------------|
| Full   | Audience indegree | -30        | -0.0607239 | 0.0231598 | -0.1238096 | 0.0023618  |
| Full   | Audience indegree | -29        | -0.0252569 | 0.0204178 | -0.0808734 | 0.0303596  |
| Full   | Audience indegree | -28        | 0.0706010  | 0.0966644 | -0.1927059 | 0.3339079  |
| Full   | Audience indegree | -27        | 0.0484789  | 0.0235522 | -0.0156755 | 0.1126334  |
| Full   | Audience indegree | -26        | -0.0557473 | 0.0403667 | -0.1657034 | 0.0542088  |
| Full   | Audience indegree | -25        | 0.0172862  | 0.0160629 | -0.0264681 | 0.0610405  |
| Full   | Audience indegree | -24        | 0.0204425  | 0.0268811 | -0.0527797 | 0.0936648  |
| Full   | Audience indegree | -23        | -0.0672894 | 0.0480989 | -0.1983074 | 0.0637287  |
| Full   | Audience indegree | -22        | 0.0304530  | 0.0464591 | -0.0960983 | 0.1570043  |
| Full   | Audience indegree | -21        | -0.1230796 | 0.0374045 | -0.2249667 | -0.0211925 |
| Full   | Audience indegree | -20        | -0.0218771 | 0.0340459 | -0.1146156 | 0.0708614  |
| Full   | Audience indegree | -19        | 0.0103373  | 0.0552643 | -0.1401986 | 0.1608731  |
| Full   | Audience indegree | -18        | -0.1023710 | 0.0401499 | -0.2117366 | 0.0069946  |
| Full   | Audience indegree | -17        | 0.0332864  | 0.0173088 | -0.0138616 | 0.0804344  |
| Full   | Audience indegree | -16        | -0.0234777 | 0.0440312 | -0.1434155 | 0.0964601  |
| Full   | Audience indegree | -15        | -0.0071779 | 0.0370437 | -0.1080822 | 0.0937263  |
| Full   | Audience indegree | -14        | 0.0373111  | 0.0101101 | 0.0097719  | 0.0648504  |
| Full   | Audience indegree | -13        | 0.0064488  | 0.0286753 | -0.0716607 | 0.0845583  |
| Full   | Audience indegree | -12        | -0.0497349 | 0.0434987 | -0.1682222 | 0.0687524  |

|      |                   |     |            |           |            |            |
|------|-------------------|-----|------------|-----------|------------|------------|
| Full | Audience indegree | -11 | 0.0617848  | 0.0428426 | -0.0549153 | 0.1784849  |
| Full | Audience indegree | -10 | 0.0044249  | 0.0355958 | -0.0925354 | 0.1013853  |
| Full | Audience indegree | -9  | -0.0571453 | 0.0584674 | -0.2164063 | 0.1021158  |
| Full | Audience indegree | -8  | -0.0131077 | 0.0360128 | -0.1112039 | 0.0849885  |
| Full | Audience indegree | -7  | -0.0601662 | 0.0341246 | -0.1531191 | 0.0327866  |
| Full | Audience indegree | -6  | 0.0210402  | 0.0814367 | -0.2007874 | 0.2428678  |
| Full | Audience indegree | -5  | 0.0222288  | 0.0551303 | -0.1279422 | 0.1723997  |
| Full | Audience indegree | -4  | -0.0438509 | 0.0249517 | -0.1118175 | 0.0241158  |
| Full | Audience indegree | -3  | -0.0041962 | 0.0518678 | -0.1454804 | 0.1370881  |
| Full | Audience indegree | -2  | 0.0063861  | 0.0419304 | -0.1078292 | 0.1206014  |
| Full | Audience indegree | -1  | -0.0411140 | 0.0360715 | -0.1393703 | 0.0571423  |
| Full | Audience indegree | 0   | -0.0415524 | 0.0134643 | -0.0782281 | -0.0048766 |
| Full | Audience indegree | 1   | -0.0724016 | 0.0366089 | -0.1721216 | 0.0273184  |
| Full | Audience indegree | 2   | -0.0259295 | 0.0396759 | -0.1340038 | 0.0821449  |
| Full | Audience indegree | 3   | 0.0405616  | 0.0608462 | -0.1251792 | 0.2063024  |
| Full | Audience indegree | 4   | 0.0428551  | 0.0852946 | -0.1894812 | 0.2751913  |
| Full | Audience indegree | 5   | 0.0462647  | 0.0824383 | -0.1782912 | 0.2708207  |
| Full | Audience indegree | 6   | -0.1085658 | 0.0571999 | -0.2643742 | 0.0472427  |
| Full | Audience indegree | 7   | -0.0370959 | 0.0545226 | -0.1856115 | 0.1114197  |
| Full | Audience indegree | 8   | -0.0708971 | 0.0617076 | -0.2389843 | 0.0971900  |
| Full | Audience indegree | 9   | -0.0419012 | 0.0638038 | -0.2156981 | 0.1318958  |
| Full | Audience indegree | 10  | -0.0041876 | 0.0702373 | -0.1955091 | 0.1871338  |
| Full | Audience indegree | 11  | 0.0453624  | 0.1084315 | -0.2499970 | 0.3407219  |
| Full | Audience indegree | 12  | 0.0305234  | 0.0922239 | -0.2206878 | 0.2817347  |
| Full | Audience indegree | 13  | -0.0872225 | 0.0730239 | -0.2861344 | 0.1116894  |
| Full | Audience indegree | 14  | 0.0650433  | 0.1672748 | -0.3906012 | 0.5206879  |
| Full | Audience indegree | 15  | 0.1110425  | 0.1887503 | -0.4030998 | 0.6251848  |
| Full | Audience indegree | 16  | 0.1574964  | 0.2363271 | -0.4862417 | 0.8012345  |
| Full | Audience indegree | 17  | 0.1670325  | 0.2805687 | -0.5972164 | 0.9312815  |
| Full | Audience indegree | 18  | 0.2019498  | 0.2351079 | -0.4384673 | 0.8423668  |
| Full | Audience indegree | 19  | -0.0275791 | 0.1076584 | -0.3208328 | 0.2656747  |
| Full | Audience indegree | 20  | 0.0946083  | 0.1548300 | -0.3271375 | 0.5163541  |
| Full | Audience indegree | 21  | -0.0401479 | 0.0674677 | -0.2239251 | 0.1436293  |
| Full | Audience indegree | 22  | 0.0218585  | 0.0743179 | -0.1805782 | 0.2242952  |
| Full | Audience indegree | 23  | 0.0441581  | 0.2047050 | -0.5134435 | 0.6017598  |
| Full | Audience indegree | 24  | 0.0987656  | 0.1968549 | -0.4374530 | 0.6349842  |
| Full | Audience indegree | 25  | 0.0737282  | 0.2276588 | -0.5463980 | 0.6938543  |
| Full | Audience indegree | 26  | -0.1066883 | 0.1054945 | -0.3940477 | 0.1806710  |
| Full | Audience indegree | 27  | -0.2511059 | 0.1033401 | -0.5325970 | 0.0303851  |
| Full | Audience indegree | 28  | -0.2447269 | 0.1643793 | -0.6924843 | 0.2030306  |
| Full | Audience indegree | 29  | -0.3076177 | 0.1384006 | -0.6846109 | 0.0693754  |

|      |                   |    |            |           |            |            |
|------|-------------------|----|------------|-----------|------------|------------|
| Full | Audience indegree | 30 | -0.4454500 | 0.1496703 | -0.8531411 | -0.0377590 |
|------|-------------------|----|------------|-----------|------------|------------|

| sample | outcome           | event.time | estimate   | std.error | conf.low   | conf.high  |
|--------|-------------------|------------|------------|-----------|------------|------------|
| Most   | Audience indegree | -30        | -0.1857832 | 0.2122527 | -0.7134741 | 0.3419077  |
| Most   | Audience indegree | -29        | -0.0326764 | 0.0204494 | -0.0835167 | 0.0181639  |
| Most   | Audience indegree | -28        | 0.1837263  | 0.4355218 | -0.8990437 | 1.2664963  |
| Most   | Audience indegree | -27        | -0.0901910 | 0.1018797 | -0.3434786 | 0.1630966  |
| Most   | Audience indegree | -26        | -0.1963854 | 0.1388206 | -0.5415135 | 0.1487427  |
| Most   | Audience indegree | -25        | 0.2915338  | 0.0640909 | 0.1321946  | 0.4508729  |
| Most   | Audience indegree | -24        | -0.0668911 | 0.0353123 | -0.1546825 | 0.0209003  |
| Most   | Audience indegree | -23        | -0.2211847 | 0.0592494 | -0.3684874 | -0.0738821 |
| Most   | Audience indegree | -22        | -0.0100907 | 0.0605883 | -0.1607219 | 0.1405404  |
| Most   | Audience indegree | -21        | -0.1735370 | 0.1010344 | -0.4247232 | 0.0776492  |
| Most   | Audience indegree | -20        | 0.1811895  | 0.1277492 | -0.1364134 | 0.4987924  |
| Most   | Audience indegree | -19        | 0.0422514  | 0.1661022 | -0.3707026 | 0.4552054  |
| Most   | Audience indegree | -18        | -0.1695087 | 0.1094899 | -0.4417163 | 0.1026990  |
| Most   | Audience indegree | -17        | 0.0503794  | 0.0515992 | -0.0779038 | 0.1786625  |
| Most   | Audience indegree | -16        | -0.0631083 | 0.0512188 | -0.1904455 | 0.0642290  |
| Most   | Audience indegree | -15        | 0.0580828  | 0.0896129 | -0.1647078 | 0.2808734  |
| Most   | Audience indegree | -14        | -0.0527875 | 0.0482424 | -0.1727251 | 0.0671500  |
| Most   | Audience indegree | -13        | 0.0464448  | 0.0360297 | -0.0431303 | 0.1360199  |
| Most   | Audience indegree | -12        | 0.0471615  | 0.0415566 | -0.0561541 | 0.1504772  |
| Most   | Audience indegree | -11        | 0.0122176  | 0.0536393 | -0.1211375 | 0.1455727  |
| Most   | Audience indegree | -10        | 0.0226298  | 0.0920182 | -0.2061409 | 0.2514004  |
| Most   | Audience indegree | -9         | 0.0506694  | 0.1064937 | -0.2140893 | 0.3154280  |
| Most   | Audience indegree | -8         | 0.0272208  | 0.0789201 | -0.1689858 | 0.2234275  |
| Most   | Audience indegree | -7         | -0.0810896 | 0.0563488 | -0.2211809 | 0.0590016  |
| Most   | Audience indegree | -6         | 0.0071971  | 0.0850873 | -0.2043421 | 0.2187363  |
| Most   | Audience indegree | -5         | 0.1572602  | 0.1402190 | -0.1913446 | 0.5058650  |
| Most   | Audience indegree | -4         | -0.1247552 | 0.0785943 | -0.3201520 | 0.0706416  |
| Most   | Audience indegree | -3         | 0.0634063  | 0.0801659 | -0.1358978 | 0.2627103  |
| Most   | Audience indegree | -2         | -0.0347557 | 0.1253634 | -0.3464272 | 0.2769157  |
| Most   | Audience indegree | -1         | 0.0096275  | 0.0814829 | -0.1929508 | 0.2122058  |
| Most   | Audience indegree | 0          | -0.1121748 | 0.0489874 | -0.2339645 | 0.0096149  |
| Most   | Audience indegree | 1          | -0.1589796 | 0.0659967 | -0.3230569 | 0.0050977  |
| Most   | Audience indegree | 2          | -0.1045848 | 0.0547444 | -0.2406872 | 0.0315176  |
| Most   | Audience indegree | 3          | 0.0203812  | 0.1457249 | -0.3419118 | 0.3826742  |
| Most   | Audience indegree | 4          | 0.0542175  | 0.0624208 | -0.1009696 | 0.2094047  |
| Most   | Audience indegree | 5          | 0.0948393  | 0.1108455 | -0.1807386 | 0.3704173  |
| Most   | Audience indegree | 6          | -0.0912604 | 0.0761033 | -0.2804642 | 0.0979433  |
| Most   | Audience indegree | 7          | 0.0137441  | 0.0854253 | -0.1986356 | 0.2261237  |

|      |                   |    |            |           |            |           |
|------|-------------------|----|------------|-----------|------------|-----------|
| Most | Audience indegree | 8  | 0.0099822  | 0.1176101 | -0.2824134 | 0.3023777 |
| Most | Audience indegree | 9  | -0.0078376 | 0.1178313 | -0.3007832 | 0.2851081 |
| Most | Audience indegree | 10 | 0.0750111  | 0.1331444 | -0.2560052 | 0.4060274 |
| Most | Audience indegree | 11 | 0.0380788  | 0.1480910 | -0.3300968 | 0.4062544 |
| Most | Audience indegree | 12 | -0.0343814 | 0.1349251 | -0.3698248 | 0.3010619 |
| Most | Audience indegree | 13 | 0.0370799  | 0.1449589 | -0.3233088 | 0.3974687 |
| Most | Audience indegree | 14 | 0.2687876  | 0.2798241 | -0.4268954 | 0.9644706 |
| Most | Audience indegree | 15 | 0.3942345  | 0.3651533 | -0.5135893 | 1.3020583 |
| Most | Audience indegree | 16 | 0.3452279  | 0.4527051 | -0.7802623 | 1.4707181 |
| Most | Audience indegree | 17 | 0.3855943  | 0.4094473 | -0.6323508 | 1.4035393 |
| Most | Audience indegree | 18 | 0.5550776  | 0.4089163 | -0.4615473 | 1.5717025 |
| Most | Audience indegree | 19 | 0.4385014  | 0.3642007 | -0.4669540 | 1.3439568 |
| Most | Audience indegree | 20 | 0.5070522  | 0.4037486 | -0.4967251 | 1.5108295 |
| Most | Audience indegree | 21 | 0.2465373  | 0.3184477 | -0.5451697 | 1.0382442 |
| Most | Audience indegree | 22 | 0.4305183  | 0.3483098 | -0.4354301 | 1.2964668 |
| Most | Audience indegree | 23 | 0.3375341  | 0.3994682 | -0.6556015 | 1.3306696 |
| Most | Audience indegree | 24 | 0.4349821  | 0.3930997 | -0.5423205 | 1.4122848 |
| Most | Audience indegree | 25 | 0.2761399  | 0.3148650 | -0.5066599 | 1.0589398 |
| Most | Audience indegree | 26 | 0.2727973  | 0.2839255 | -0.4330825 | 0.9786771 |
| Most | Audience indegree | 27 | 0.0378055  | 0.2871135 | -0.6760001 | 0.7516110 |
| Most | Audience indegree | 28 | -0.1225943 | 0.3683233 | -1.0382992 | 0.7931106 |
| Most | Audience indegree | 29 | -0.2219710 | 0.2248092 | -0.7808790 | 0.3369370 |
| Most | Audience indegree | 30 | -0.1769360 | 0.2707927 | -0.8501658 | 0.4962938 |

| sample | outcome           | event.time | estimate   | std.error | conf.low   | conf.high  |
|--------|-------------------|------------|------------|-----------|------------|------------|
| Middle | Audience indegree | -30        | -0.0730623 | 0.0416698 | -0.1791876 | 0.0330629  |
| Middle | Audience indegree | -29        | -0.0550229 | 0.0503944 | -0.1833680 | 0.0733222  |
| Middle | Audience indegree | -28        | 0.0566745  | 0.0287661 | -0.0165874 | 0.1299363  |
| Middle | Audience indegree | -27        | 0.0864259  | 0.0430435 | -0.0231979 | 0.1960497  |
| Middle | Audience indegree | -26        | 0.0090984  | 0.0493240 | -0.1165207 | 0.1347175  |
| Middle | Audience indegree | -25        | -0.0526141 | 0.0339117 | -0.1389808 | 0.0337527  |
| Middle | Audience indegree | -24        | -0.0403637 | 0.0474845 | -0.1612980 | 0.0805706  |
| Middle | Audience indegree | -23        | -0.0349386 | 0.0489734 | -0.1596649 | 0.0897876  |
| Middle | Audience indegree | -22        | 0.1603063  | 0.0333512 | 0.0753670  | 0.2452456  |
| Middle | Audience indegree | -21        | -0.1645868 | 0.0767839 | -0.3601411 | 0.0309675  |
| Middle | Audience indegree | -20        | -0.1038992 | 0.0232581 | -0.1631333 | -0.0446651 |
| Middle | Audience indegree | -19        | -0.0341081 | 0.0338336 | -0.1202760 | 0.0520597  |
| Middle | Audience indegree | -18        | -0.1057484 | 0.0670311 | -0.2764641 | 0.0649674  |
| Middle | Audience indegree | -17        | 0.0551521  | 0.0144537 | 0.0183411  | 0.0919630  |
| Middle | Audience indegree | -16        | 0.0276575  | 0.0862292 | -0.1919522 | 0.2472673  |
| Middle | Audience indegree | -15        | -0.0349632 | 0.0280670 | -0.1064446 | 0.0365182  |

|        |                   |     |            |           |            |            |
|--------|-------------------|-----|------------|-----------|------------|------------|
| Middle | Audience indegree | -14 | 0.0736154  | 0.0257277 | 0.0080917  | 0.1391392  |
| Middle | Audience indegree | -13 | -0.0464342 | 0.0267145 | -0.1144710 | 0.0216026  |
| Middle | Audience indegree | -12 | -0.0591921 | 0.0551794 | -0.1997239 | 0.0813397  |
| Middle | Audience indegree | -11 | 0.0988175  | 0.0643684 | -0.0651170 | 0.2627520  |
| Middle | Audience indegree | -10 | 0.0640545  | 0.0644053 | -0.0999739 | 0.2280830  |
| Middle | Audience indegree | -9  | -0.1605358 | 0.0964034 | -0.4060574 | 0.0849858  |
| Middle | Audience indegree | -8  | 0.0021450  | 0.0304755 | -0.0754705 | 0.0797605  |
| Middle | Audience indegree | -7  | -0.0459234 | 0.0503289 | -0.1741017 | 0.0822548  |
| Middle | Audience indegree | -6  | 0.0772934  | 0.0640850 | -0.0859194 | 0.2405061  |
| Middle | Audience indegree | -5  | -0.0401296 | 0.0487611 | -0.1643152 | 0.0840560  |
| Middle | Audience indegree | -4  | -0.0707827 | 0.0361638 | -0.1628853 | 0.0213199  |
| Middle | Audience indegree | -3  | -0.0371909 | 0.0577032 | -0.1841504 | 0.1097686  |
| Middle | Audience indegree | -2  | 0.0289211  | 0.0425984 | -0.0795692 | 0.1374115  |
| Middle | Audience indegree | -1  | -0.0084627 | 0.0352315 | -0.0981907 | 0.0812653  |
| Middle | Audience indegree | 0   | 0.0007485  | 0.0283796 | -0.0715291 | 0.0730262  |
| Middle | Audience indegree | 1   | -0.0473542 | 0.0567494 | -0.1918844 | 0.0971760  |
| Middle | Audience indegree | 2   | -0.0183844 | 0.0586685 | -0.1678022 | 0.1310333  |
| Middle | Audience indegree | 3   | 0.0342347  | 0.0595415 | -0.1174065 | 0.1858759  |
| Middle | Audience indegree | 4   | 0.0619110  | 0.1042573 | -0.2036130 | 0.3274350  |
| Middle | Audience indegree | 5   | 0.0073765  | 0.0735484 | -0.1799377 | 0.1946907  |
| Middle | Audience indegree | 6   | -0.0786664 | 0.0710602 | -0.2596437 | 0.1023108  |
| Middle | Audience indegree | 7   | -0.0364267 | 0.0583842 | -0.1851204 | 0.1122669  |
| Middle | Audience indegree | 8   | -0.1098233 | 0.0499507 | -0.2370386 | 0.0173920  |
| Middle | Audience indegree | 9   | -0.1073357 | 0.0637489 | -0.2696923 | 0.0550210  |
| Middle | Audience indegree | 10  | -0.0204657 | 0.0700472 | -0.1988629 | 0.1579316  |
| Middle | Audience indegree | 11  | 0.0197413  | 0.0718691 | -0.1632960 | 0.2027786  |
| Middle | Audience indegree | 12  | 0.0630997  | 0.1282127 | -0.2634344 | 0.3896337  |
| Middle | Audience indegree | 13  | -0.1257181 | 0.0619095 | -0.2833900 | 0.0319539  |
| Middle | Audience indegree | 14  | -0.0051694 | 0.1496822 | -0.3863822 | 0.3760434  |
| Middle | Audience indegree | 15  | -0.0315509 | 0.0815586 | -0.2392657 | 0.1761638  |
| Middle | Audience indegree | 16  | 0.0920292  | 0.1411157 | -0.2673664 | 0.4514248  |
| Middle | Audience indegree | 17  | 0.1342346  | 0.2283686 | -0.4473780 | 0.7158472  |
| Middle | Audience indegree | 18  | 0.1129565  | 0.1805802 | -0.3469479 | 0.5728609  |
| Middle | Audience indegree | 19  | -0.1308731 | 0.1304843 | -0.4631925 | 0.2014463  |
| Middle | Audience indegree | 20  | 0.0382717  | 0.0706200 | -0.1415843 | 0.2181277  |
| Middle | Audience indegree | 21  | -0.0330661 | 0.0755796 | -0.2255533 | 0.1594210  |
| Middle | Audience indegree | 22  | -0.1118187 | 0.0402286 | -0.2142736 | -0.0093639 |
| Middle | Audience indegree | 23  | -0.0340754 | 0.1375063 | -0.3842785 | 0.3161278  |
| Middle | Audience indegree | 24  | 0.0193585  | 0.2112042 | -0.5185395 | 0.5572565  |
| Middle | Audience indegree | 25  | 0.0541932  | 0.2319372 | -0.5365080 | 0.6448944  |
| Middle | Audience indegree | 26  | -0.2351540 | 0.0932033 | -0.4725256 | 0.0022176  |

|        |                   |    |            |           |            |            |
|--------|-------------------|----|------------|-----------|------------|------------|
| Middle | Audience indegree | 27 | -0.4155137 | 0.1168526 | -0.7131156 | -0.1179117 |
| Middle | Audience indegree | 28 | -0.1990452 | 0.1998695 | -0.7080759 | 0.3099855  |
| Middle | Audience indegree | 29 | -0.3246592 | 0.3412080 | -1.1936529 | 0.5443345  |
| Middle | Audience indegree | 30 | -0.5176073 | 0.1185880 | -0.8196289 | -0.2155857 |

| sample | outcome           | event.time | estimate   | std.error | conf.low   | conf.high  |
|--------|-------------------|------------|------------|-----------|------------|------------|
| Least  | Audience indegree | -30        | 0.0543387  | 0.0310720 | -0.0212604 | 0.1299378  |
| Least  | Audience indegree | -29        | 0.0195647  | 0.0399346 | -0.0775973 | 0.1167266  |
| Least  | Audience indegree | -28        | 0.0054613  | 0.0648329 | -0.1522791 | 0.1632017  |
| Least  | Audience indegree | -27        | 0.0925192  | 0.0284276 | 0.0233541  | 0.1616843  |
| Least  | Audience indegree | -26        | -0.0474698 | 0.0244840 | -0.1070402 | 0.0121006  |
| Least  | Audience indegree | -25        | -0.0936883 | 0.0565811 | -0.2313518 | 0.0439751  |
| Least  | Audience indegree | -24        | 0.1682613  | 0.0422410 | 0.0654876  | 0.2710351  |
| Least  | Audience indegree | -23        | 0.0259568  | 0.1029515 | -0.2245272 | 0.2764408  |
| Least  | Audience indegree | -22        | -0.1184619 | 0.1233978 | -0.4186923 | 0.1817685  |
| Least  | Audience indegree | -21        | -0.0096910 | 0.0311939 | -0.0855866 | 0.0662047  |
| Least  | Audience indegree | -20        | -0.0867433 | 0.0277937 | -0.1543662 | -0.0191204 |
| Least  | Audience indegree | -19        | 0.0966151  | 0.0751853 | -0.0863130 | 0.2795433  |
| Least  | Audience indegree | -18        | -0.0432174 | 0.0892069 | -0.2602605 | 0.1738257  |
| Least  | Audience indegree | -17        | -0.0136880 | 0.0208370 | -0.0643850 | 0.0370090  |
| Least  | Audience indegree | -16        | -0.0438003 | 0.0386369 | -0.1378050 | 0.0502045  |
| Least  | Audience indegree | -15        | 0.0072087  | 0.0337447 | -0.0748930 | 0.0893105  |
| Least  | Audience indegree | -14        | 0.0568703  | 0.0601830 | -0.0895568 | 0.2032973  |
| Least  | Audience indegree | -13        | 0.0160695  | 0.0627006 | -0.1364829 | 0.1686218  |
| Least  | Audience indegree | -12        | -0.1115107 | 0.1295689 | -0.4267557 | 0.2037342  |
| Least  | Audience indegree | -11        | 0.0134423  | 0.0417483 | -0.0881326 | 0.1150173  |
| Least  | Audience indegree | -10        | -0.0788075 | 0.0563101 | -0.2158117 | 0.0581967  |
| Least  | Audience indegree | -9         | 0.0070743  | 0.0826719 | -0.1940690 | 0.2082176  |
| Least  | Audience indegree | -8         | -0.0430712 | 0.0488298 | -0.1618756 | 0.0757332  |
| Least  | Audience indegree | -7         | -0.0450164 | 0.0713010 | -0.2184938 | 0.1284609  |
| Least  | Audience indegree | -6         | -0.0269816 | 0.1431371 | -0.3752385 | 0.3212753  |
| Least  | Audience indegree | -5         | 0.0089137  | 0.0854872 | -0.1990793 | 0.2169067  |
| Least  | Audience indegree | -4         | 0.0627195  | 0.0772092 | -0.1251328 | 0.2505717  |
| Least  | Audience indegree | -3         | -0.0169411 | 0.0333848 | -0.0981674 | 0.0642851  |
| Least  | Audience indegree | -2         | -0.0469622 | 0.0841454 | -0.2516904 | 0.1577661  |
| Least  | Audience indegree | -1         | -0.0826413 | 0.1002231 | -0.3264872 | 0.1612045  |
| Least  | Audience indegree | 0          | -0.0545332 | 0.0731592 | -0.2325318 | 0.1234653  |
| Least  | Audience indegree | 1          | -0.0510883 | 0.0441579 | -0.1585259 | 0.0563493  |
| Least  | Audience indegree | 2          | -0.0127632 | 0.0428722 | -0.1170724 | 0.0915461  |
| Least  | Audience indegree | 3          | 0.0196215  | 0.0334128 | -0.0616728 | 0.1009158  |
| Least  | Audience indegree | 4          | -0.0455469 | 0.0828971 | -0.2472379 | 0.1561441  |



|       |                   |    |            |           |            |            |
|-------|-------------------|----|------------|-----------|------------|------------|
| Least | Audience indegree | 5  | -0.0012778 | 0.0829255 | -0.2030380 | 0.2004825  |
| Least | Audience indegree | 6  | -0.1678614 | 0.0766211 | -0.3542828 | 0.0185601  |
| Least | Audience indegree | 7  | -0.1095546 | 0.0333141 | -0.1906087 | -0.0285005 |
| Least | Audience indegree | 8  | -0.0805787 | 0.0576513 | -0.2208460 | 0.0596886  |
| Least | Audience indegree | 9  | -0.0204064 | 0.0589300 | -0.1637847 | 0.1229720  |
| Least | Audience indegree | 10 | -0.1292107 | 0.0463113 | -0.2418875 | -0.0165338 |
| Least | Audience indegree | 11 | -0.0292968 | 0.0578569 | -0.1700643 | 0.1114706  |
| Least | Audience indegree | 12 | -0.0601675 | 0.0661161 | -0.2210299 | 0.1006950  |
| Least | Audience indegree | 13 | -0.2160860 | 0.0715147 | -0.3900835 | -0.0420886 |
| Least | Audience indegree | 14 | -0.1715493 | 0.0475842 | -0.2873231 | -0.0557755 |
| Least | Audience indegree | 15 | -0.1572559 | 0.0333526 | -0.2384037 | -0.0761081 |
| Least | Audience indegree | 16 | -0.1605253 | 0.0442805 | -0.2682611 | -0.0527894 |
| Least | Audience indegree | 17 | -0.1736911 | 0.1996159 | -0.6593625 | 0.3119804  |
| Least | Audience indegree | 18 | -0.1317022 | 0.1048923 | -0.3869082 | 0.1235038  |
| Least | Audience indegree | 19 | -0.3425932 | 0.1437965 | -0.6924543 | 0.0072678  |
| Least | Audience indegree | 20 | -0.2996267 | 0.1099166 | -0.5670572 | -0.0321963 |
| Least | Audience indegree | 21 | -0.3591404 | 0.1159233 | -0.6411851 | -0.0770957 |
| Least | Audience indegree | 22 | -0.2268652 | 0.0483255 | -0.3444426 | -0.1092877 |
| Least | Audience indegree | 23 | -0.2398892 | 0.1472256 | -0.5980935 | 0.1183150  |
| Least | Audience indegree | 24 | -0.2130031 | 0.0476242 | -0.3288743 | -0.0971319 |
| Least | Audience indegree | 25 | -0.1881089 | 0.1171978 | -0.4732547 | 0.0970369  |
| Least | Audience indegree | 26 | -0.3042618 | 0.0642984 | -0.4607017 | -0.1478218 |
| Least | Audience indegree | 27 | -0.2020640 | 0.3753659 | -1.1153403 | 0.7112124  |
| Least | Audience indegree | 28 | -0.3482591 | 0.1974151 | -0.8285760 | 0.1320578  |
| Least | Audience indegree | 29 | -0.3034300 | 0.2893649 | -1.0074633 | 0.4006033  |
| Least | Audience indegree | 30 | -0.4053786 | 0.5601749 | -1.7683006 | 0.9575435  |

## Audience outdegree/total outdegree

Average effect by length of exposure (Callaway and Sant'Anna)

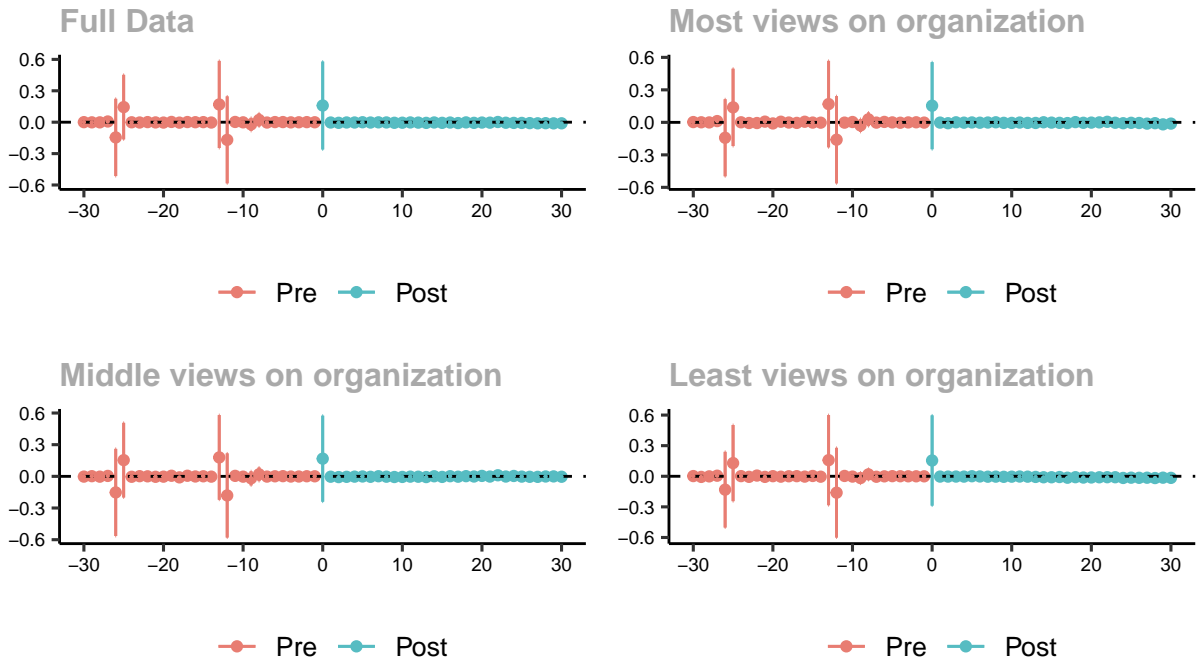

Long timeframe with sampled control groups

| sample | outcome                            | event.time | estimate   | std.error | conf.low   | conf.high  |
|--------|------------------------------------|------------|------------|-----------|------------|------------|
| Full   | Audience outdegree/total outdegree | -30        | 0.0003922  | 0.0011097 | -0.0024768 | 0.0032612  |
| Full   | Audience outdegree/total outdegree | -29        | -0.0013186 | 0.0015954 | -0.0054434 | 0.0028063  |
| Full   | Audience outdegree/total outdegree | -28        | -0.0017472 | 0.0012419 | -0.0049582 | 0.0014637  |
| Full   | Audience outdegree/total outdegree | -27        | 0.0067019  | 0.0018176 | 0.0020026  | 0.0114012  |
| Full   | Audience outdegree/total outdegree | -26        | -0.1455334 | 0.1426846 | -0.5144450 | 0.2233783  |
| Full   | Audience outdegree/total outdegree | -25        | 0.1443141  | 0.1191481 | -0.1637438 | 0.4523720  |
| Full   | Audience outdegree/total outdegree | -24        | -0.0009487 | 0.0017238 | -0.0054057 | 0.0035082  |
| Full   | Audience outdegree/total outdegree | -23        | -0.0029552 | 0.0015987 | -0.0070886 | 0.0011782  |
| Full   | Audience outdegree/total outdegree | -22        | 0.0008853  | 0.0010684 | -0.0018771 | 0.0036477  |
| Full   | Audience outdegree/total outdegree | -21        | -0.0020904 | 0.0019915 | -0.0072393 | 0.0030585  |
| Full   | Audience outdegree/total outdegree | -20        | -0.0035976 | 0.0025294 | -0.0101373 | 0.0029421  |
| Full   | Audience outdegree/total outdegree | -19        | 0.0024774  | 0.0006763 | 0.0007289  | 0.0042259  |
| Full   | Audience outdegree/total outdegree | -18        | -0.0042713 | 0.0009866 | -0.0068222 | -0.0017203 |
| Full   | Audience outdegree/total outdegree | -17        | 0.0013545  | 0.0010493 | -0.0013585 | 0.0040674  |
| Full   | Audience outdegree/total outdegree | -16        | -0.0000772 | 0.0011067 | -0.0029386 | 0.0027842  |
| Full   | Audience outdegree/total outdegree | -15        | 0.0006997  | 0.0009379 | -0.0017251 | 0.0031246  |
| Full   | Audience outdegree/total outdegree | -14        | -0.0032848 | 0.0010065 | -0.0058870 | -0.0006826 |
| Full   | Audience outdegree/total outdegree | -13        | 0.1695991  | 0.1609444 | -0.2465232 | 0.5857213  |
| Full   | Audience outdegree/total outdegree | -12        | -0.1687158 | 0.1605432 | -0.5838008 | 0.2463693  |

|      |                                    |     |            |           |            |            |
|------|------------------------------------|-----|------------|-----------|------------|------------|
| Full | Audience outdegree/total outdegree | -11 | 0.0022633  | 0.0009280 | -0.0001361 | 0.0046628  |
| Full | Audience outdegree/total outdegree | -10 | -0.0013628 | 0.0018796 | -0.0062226 | 0.0034969  |
| Full | Audience outdegree/total outdegree | -9  | -0.0209682 | 0.0242413 | -0.0836440 | 0.0417077  |
| Full | Audience outdegree/total outdegree | -8  | 0.0216953  | 0.0244401 | -0.0414946 | 0.0848852  |
| Full | Audience outdegree/total outdegree | -7  | -0.0030947 | 0.0008273 | -0.0052337 | -0.0009556 |
| Full | Audience outdegree/total outdegree | -6  | 0.0011023  | 0.0015290 | -0.0028509 | 0.0050555  |
| Full | Audience outdegree/total outdegree | -5  | 0.0010896  | 0.0010818 | -0.0017075 | 0.0038867  |
| Full | Audience outdegree/total outdegree | -4  | -0.0015652 | 0.0008526 | -0.0037697 | 0.0006393  |
| Full | Audience outdegree/total outdegree | -3  | -0.0007891 | 0.0008783 | -0.0030599 | 0.0014817  |
| Full | Audience outdegree/total outdegree | -2  | 0.0005511  | 0.0007232 | -0.0013189 | 0.0024210  |
| Full | Audience outdegree/total outdegree | -1  | -0.0006246 | 0.0009328 | -0.0030363 | 0.0017870  |
| Full | Audience outdegree/total outdegree | 0   | 0.1594231  | 0.1623170 | -0.2602481 | 0.5790943  |
| Full | Audience outdegree/total outdegree | 1   | -0.0030804 | 0.0014717 | -0.0068854 | 0.0007246  |
| Full | Audience outdegree/total outdegree | 2   | -0.0060452 | 0.0015379 | -0.0100214 | -0.0020691 |
| Full | Audience outdegree/total outdegree | 3   | -0.0026119 | 0.0009859 | -0.0051609 | -0.0000628 |
| Full | Audience outdegree/total outdegree | 4   | -0.0029998 | 0.0004659 | -0.0042044 | -0.0017953 |
| Full | Audience outdegree/total outdegree | 5   | -0.0004737 | 0.0025315 | -0.0070190 | 0.0060716  |
| Full | Audience outdegree/total outdegree | 6   | -0.0032654 | 0.0010729 | -0.0060394 | -0.0004914 |
| Full | Audience outdegree/total outdegree | 7   | -0.0014917 | 0.0014850 | -0.0053311 | 0.0023478  |
| Full | Audience outdegree/total outdegree | 8   | -0.0024236 | 0.0013891 | -0.0060150 | 0.0011679  |
| Full | Audience outdegree/total outdegree | 9   | -0.0057651 | 0.0018113 | -0.0104482 | -0.0010821 |
| Full | Audience outdegree/total outdegree | 10  | -0.0050961 | 0.0012181 | -0.0082455 | -0.0019467 |
| Full | Audience outdegree/total outdegree | 11  | -0.0025571 | 0.0008328 | -0.0047102 | -0.0004040 |
| Full | Audience outdegree/total outdegree | 12  | -0.0040642 | 0.0015614 | -0.0081011 | -0.0000272 |
| Full | Audience outdegree/total outdegree | 13  | -0.0065827 | 0.0020768 | -0.0119523 | -0.0012132 |
| Full | Audience outdegree/total outdegree | 14  | -0.0028223 | 0.0013145 | -0.0062208 | 0.0005763  |
| Full | Audience outdegree/total outdegree | 15  | -0.0062197 | 0.0030829 | -0.0141906 | 0.0017512  |
| Full | Audience outdegree/total outdegree | 16  | -0.0034971 | 0.0051139 | -0.0167191 | 0.0097249  |
| Full | Audience outdegree/total outdegree | 17  | -0.0082728 | 0.0060012 | -0.0237888 | 0.0072433  |
| Full | Audience outdegree/total outdegree | 18  | -0.0019266 | 0.0058218 | -0.0169789 | 0.0131257  |
| Full | Audience outdegree/total outdegree | 19  | -0.0062322 | 0.0035711 | -0.0154654 | 0.0030009  |
| Full | Audience outdegree/total outdegree | 20  | -0.0033773 | 0.0047540 | -0.0156689 | 0.0089143  |
| Full | Audience outdegree/total outdegree | 21  | -0.0044884 | 0.0023907 | -0.0106695 | 0.0016926  |
| Full | Audience outdegree/total outdegree | 22  | 0.0020053  | 0.0048698 | -0.0105856 | 0.0145962  |
| Full | Audience outdegree/total outdegree | 23  | -0.0051944 | 0.0057709 | -0.0201150 | 0.0097262  |
| Full | Audience outdegree/total outdegree | 24  | -0.0067463 | 0.0041816 | -0.0175579 | 0.0040654  |
| Full | Audience outdegree/total outdegree | 25  | -0.0070469 | 0.0052582 | -0.0206419 | 0.0065481  |
| Full | Audience outdegree/total outdegree | 26  | -0.0087591 | 0.0025332 | -0.0153086 | -0.0022095 |
| Full | Audience outdegree/total outdegree | 27  | -0.0105519 | 0.0017793 | -0.0151524 | -0.0059515 |
| Full | Audience outdegree/total outdegree | 28  | -0.0092107 | 0.0053403 | -0.0230180 | 0.0045965  |
| Full | Audience outdegree/total outdegree | 29  | -0.0111293 | 0.0025305 | -0.0176718 | -0.0045868 |

|      |                                    |    |            |           |            |            |
|------|------------------------------------|----|------------|-----------|------------|------------|
| Full | Audience outdegree/total outdegree | 30 | -0.0106818 | 0.0013495 | -0.0141710 | -0.0071925 |
|------|------------------------------------|----|------------|-----------|------------|------------|

| sample | outcome                            | event.time | estimate   | std.error | conf.low   | conf.high  |
|--------|------------------------------------|------------|------------|-----------|------------|------------|
| Most   | Audience outdegree/total outdegree | -30        | 0.0025575  | 0.0041176 | -0.0081029 | 0.0132179  |
| Most   | Audience outdegree/total outdegree | -29        | 0.0007283  | 0.0045729 | -0.0111106 | 0.0125672  |
| Most   | Audience outdegree/total outdegree | -28        | -0.0005844 | 0.0028089 | -0.0078566 | 0.0066877  |
| Most   | Audience outdegree/total outdegree | -27        | 0.0116565  | 0.0032362 | 0.0032782  | 0.0200348  |
| Most   | Audience outdegree/total outdegree | -26        | -0.1421223 | 0.1373195 | -0.4976357 | 0.2133910  |
| Most   | Audience outdegree/total outdegree | -25        | 0.1384309  | 0.1378856 | -0.2185480 | 0.4954098  |
| Most   | Audience outdegree/total outdegree | -24        | 0.0006362  | 0.0049733 | -0.0122395 | 0.0135119  |
| Most   | Audience outdegree/total outdegree | -23        | -0.0060986 | 0.0044333 | -0.0175762 | 0.0053790  |
| Most   | Audience outdegree/total outdegree | -22        | -0.0062116 | 0.0030359 | -0.0140713 | 0.0016481  |
| Most   | Audience outdegree/total outdegree | -21        | 0.0066102  | 0.0033215 | -0.0019889 | 0.0152094  |
| Most   | Audience outdegree/total outdegree | -20        | -0.0099834 | 0.0071223 | -0.0284227 | 0.0084559  |
| Most   | Audience outdegree/total outdegree | -19        | 0.0058652  | 0.0037071 | -0.0037324 | 0.0154628  |
| Most   | Audience outdegree/total outdegree | -18        | -0.0016229 | 0.0028228 | -0.0089311 | 0.0056852  |
| Most   | Audience outdegree/total outdegree | -17        | -0.0050567 | 0.0019940 | -0.0102189 | 0.0001056  |
| Most   | Audience outdegree/total outdegree | -16        | 0.0056672  | 0.0035446 | -0.0035097 | 0.0148440  |
| Most   | Audience outdegree/total outdegree | -15        | -0.0021138 | 0.0023300 | -0.0081462 | 0.0039186  |
| Most   | Audience outdegree/total outdegree | -14        | -0.0029489 | 0.0011278 | -0.0058686 | -0.0000291 |
| Most   | Audience outdegree/total outdegree | -13        | 0.1686854  | 0.1540416 | -0.2301205 | 0.5674914  |
| Most   | Audience outdegree/total outdegree | -12        | -0.1602306 | 0.1554253 | -0.5626189 | 0.2421577  |
| Most   | Audience outdegree/total outdegree | -11        | -0.0025619 | 0.0039017 | -0.0126632 | 0.0075395  |
| Most   | Audience outdegree/total outdegree | -10        | 0.0031290  | 0.0046116 | -0.0088102 | 0.0150683  |
| Most   | Audience outdegree/total outdegree | -9         | -0.0283888 | 0.0230937 | -0.0881773 | 0.0313997  |
| Most   | Audience outdegree/total outdegree | -8         | 0.0280744  | 0.0243278 | -0.0349091 | 0.0910580  |
| Most   | Audience outdegree/total outdegree | -7         | -0.0024269 | 0.0018247 | -0.0071510 | 0.0022973  |
| Most   | Audience outdegree/total outdegree | -6         | 0.0039777  | 0.0032057 | -0.0043217 | 0.0122772  |
| Most   | Audience outdegree/total outdegree | -5         | -0.0003449 | 0.0026580 | -0.0072263 | 0.0065365  |
| Most   | Audience outdegree/total outdegree | -4         | -0.0035645 | 0.0025966 | -0.0102870 | 0.0031581  |
| Most   | Audience outdegree/total outdegree | -3         | -0.0006056 | 0.0032147 | -0.0089283 | 0.0077172  |
| Most   | Audience outdegree/total outdegree | -2         | 0.0006066  | 0.0021876 | -0.0050570 | 0.0062701  |
| Most   | Audience outdegree/total outdegree | -1         | -0.0022786 | 0.0024219 | -0.0085489 | 0.0039917  |
| Most   | Audience outdegree/total outdegree | 0          | 0.1537576  | 0.1551317 | -0.2478705 | 0.5553858  |
| Most   | Audience outdegree/total outdegree | 1          | -0.0024191 | 0.0021172 | -0.0079005 | 0.0030622  |
| Most   | Audience outdegree/total outdegree | 2          | -0.0079421 | 0.0010685 | -0.0107085 | -0.0051758 |
| Most   | Audience outdegree/total outdegree | 3          | 0.0004098  | 0.0022777 | -0.0054870 | 0.0063067  |
| Most   | Audience outdegree/total outdegree | 4          | -0.0029054 | 0.0024168 | -0.0091625 | 0.0033517  |
| Most   | Audience outdegree/total outdegree | 5          | -0.0007835 | 0.0052063 | -0.0142623 | 0.0126953  |
| Most   | Audience outdegree/total outdegree | 6          | -0.0032847 | 0.0033869 | -0.0120534 | 0.0054839  |
| Most   | Audience outdegree/total outdegree | 7          | -0.0016200 | 0.0021858 | -0.0072788 | 0.0040388  |

|      |                                    |    |            |           |            |           |
|------|------------------------------------|----|------------|-----------|------------|-----------|
| Most | Audience outdegree/total outdegree | 8  | 0.0005365  | 0.0021815 | -0.0051113 | 0.0061843 |
| Most | Audience outdegree/total outdegree | 9  | -0.0045106 | 0.0059626 | -0.0199474 | 0.0109261 |
| Most | Audience outdegree/total outdegree | 10 | -0.0051205 | 0.0033552 | -0.0138070 | 0.0035659 |
| Most | Audience outdegree/total outdegree | 11 | -0.0017932 | 0.0031088 | -0.0098419 | 0.0062554 |
| Most | Audience outdegree/total outdegree | 12 | -0.0050200 | 0.0034154 | -0.0138622 | 0.0038222 |
| Most | Audience outdegree/total outdegree | 13 | -0.0054739 | 0.0030218 | -0.0132973 | 0.0023495 |
| Most | Audience outdegree/total outdegree | 14 | 0.0007766  | 0.0060084 | -0.0147788 | 0.0163321 |
| Most | Audience outdegree/total outdegree | 15 | -0.0024589 | 0.0063097 | -0.0187945 | 0.0138766 |
| Most | Audience outdegree/total outdegree | 16 | -0.0045522 | 0.0116321 | -0.0346670 | 0.0255627 |
| Most | Audience outdegree/total outdegree | 17 | -0.0065359 | 0.0126259 | -0.0392237 | 0.0261518 |
| Most | Audience outdegree/total outdegree | 18 | 0.0022829  | 0.0110025 | -0.0262019 | 0.0307678 |
| Most | Audience outdegree/total outdegree | 19 | -0.0040982 | 0.0077598 | -0.0241879 | 0.0159915 |
| Most | Audience outdegree/total outdegree | 20 | -0.0022589 | 0.0079859 | -0.0229339 | 0.0184161 |
| Most | Audience outdegree/total outdegree | 21 | -0.0002643 | 0.0095263 | -0.0249275 | 0.0243989 |
| Most | Audience outdegree/total outdegree | 22 | 0.0050829  | 0.0094429 | -0.0193643 | 0.0295302 |
| Most | Audience outdegree/total outdegree | 23 | -0.0035568 | 0.0094919 | -0.0281307 | 0.0210172 |
| Most | Audience outdegree/total outdegree | 24 | -0.0081048 | 0.0108435 | -0.0361780 | 0.0199684 |
| Most | Audience outdegree/total outdegree | 25 | -0.0042449 | 0.0102473 | -0.0307747 | 0.0222850 |
| Most | Audience outdegree/total outdegree | 26 | -0.0058179 | 0.0063023 | -0.0221344 | 0.0104985 |
| Most | Audience outdegree/total outdegree | 27 | -0.0117307 | 0.0065219 | -0.0286154 | 0.0051541 |
| Most | Audience outdegree/total outdegree | 28 | -0.0074364 | 0.0092239 | -0.0313167 | 0.0164439 |
| Most | Audience outdegree/total outdegree | 29 | -0.0184597 | 0.0075513 | -0.0380095 | 0.0010901 |
| Most | Audience outdegree/total outdegree | 30 | -0.0115604 | 0.0078794 | -0.0319598 | 0.0088391 |

| sample | outcome                            | event.time | estimate   | std.error | conf.low   | conf.high  |
|--------|------------------------------------|------------|------------|-----------|------------|------------|
| Middle | Audience outdegree/total outdegree | -30        | -0.0024058 | 0.0014596 | -0.0060418 | 0.0012301  |
| Middle | Audience outdegree/total outdegree | -29        | 0.0014826  | 0.0009819 | -0.0009634 | 0.0039285  |
| Middle | Audience outdegree/total outdegree | -28        | -0.0029614 | 0.0021090 | -0.0082148 | 0.0022919  |
| Middle | Audience outdegree/total outdegree | -27        | 0.0041751  | 0.0021477 | -0.0011746 | 0.0095249  |
| Middle | Audience outdegree/total outdegree | -26        | -0.1522880 | 0.1656282 | -0.5648603 | 0.2602843  |
| Middle | Audience outdegree/total outdegree | -25        | 0.1535116  | 0.1419124 | -0.1999858 | 0.5070090  |
| Middle | Audience outdegree/total outdegree | -24        | -0.0039384 | 0.0028002 | -0.0109135 | 0.0030367  |
| Middle | Audience outdegree/total outdegree | -23        | 0.0014665  | 0.0025064 | -0.0047767 | 0.0077098  |
| Middle | Audience outdegree/total outdegree | -22        | 0.0004005  | 0.0017722 | -0.0040141 | 0.0048151  |
| Middle | Audience outdegree/total outdegree | -21        | -0.0043158 | 0.0016593 | -0.0084491 | -0.0001825 |
| Middle | Audience outdegree/total outdegree | -20        | -0.0030580 | 0.0023532 | -0.0089197 | 0.0028038  |
| Middle | Audience outdegree/total outdegree | -19        | 0.0056457  | 0.0006457 | 0.0040373  | 0.0072541  |
| Middle | Audience outdegree/total outdegree | -18        | -0.0096154 | 0.0026148 | -0.0161287 | -0.0031022 |
| Middle | Audience outdegree/total outdegree | -17        | 0.0055048  | 0.0018492 | 0.0008985  | 0.0101110  |
| Middle | Audience outdegree/total outdegree | -16        | -0.0012738 | 0.0018706 | -0.0059334 | 0.0033857  |
| Middle | Audience outdegree/total outdegree | -15        | 0.0006477  | 0.0012384 | -0.0024371 | 0.0037325  |

|        |                                    |     |            |           |            |            |
|--------|------------------------------------|-----|------------|-----------|------------|------------|
| Middle | Audience outdegree/total outdegree | -14 | -0.0028126 | 0.0015901 | -0.0067734 | 0.0011482  |
| Middle | Audience outdegree/total outdegree | -13 | 0.1795036  | 0.1609401 | -0.2213908 | 0.5803981  |
| Middle | Audience outdegree/total outdegree | -12 | -0.1809584 | 0.1599275 | -0.5793307 | 0.2174138  |
| Middle | Audience outdegree/total outdegree | -11 | 0.0045831  | 0.0024813 | -0.0015977 | 0.0107640  |
| Middle | Audience outdegree/total outdegree | -10 | -0.0030260 | 0.0031766 | -0.0109388 | 0.0048868  |
| Middle | Audience outdegree/total outdegree | -9  | -0.0183572 | 0.0270048 | -0.0856249 | 0.0489105  |
| Middle | Audience outdegree/total outdegree | -8  | 0.0193961  | 0.0259459 | -0.0452340 | 0.0840262  |
| Middle | Audience outdegree/total outdegree | -7  | -0.0022085 | 0.0021561 | -0.0075792 | 0.0031622  |
| Middle | Audience outdegree/total outdegree | -6  | 0.0005097  | 0.0025512 | -0.0058452 | 0.0068646  |
| Middle | Audience outdegree/total outdegree | -5  | 0.0019154  | 0.0015867 | -0.0020369 | 0.0058678  |
| Middle | Audience outdegree/total outdegree | -4  | -0.0018353 | 0.0012193 | -0.0048725 | 0.0012018  |
| Middle | Audience outdegree/total outdegree | -3  | -0.0015500 | 0.0017569 | -0.0059264 | 0.0028263  |
| Middle | Audience outdegree/total outdegree | -2  | 0.0010818  | 0.0016463 | -0.0030191 | 0.0051827  |
| Middle | Audience outdegree/total outdegree | -1  | 0.0005258  | 0.0018692 | -0.0041302 | 0.0051819  |
| Middle | Audience outdegree/total outdegree | 0   | 0.1674511  | 0.1634939 | -0.2398047 | 0.5747069  |
| Middle | Audience outdegree/total outdegree | 1   | -0.0033867 | 0.0032802 | -0.0115574 | 0.0047841  |
| Middle | Audience outdegree/total outdegree | 2   | -0.0071224 | 0.0033597 | -0.0154912 | 0.0012464  |
| Middle | Audience outdegree/total outdegree | 3   | -0.0044427 | 0.0026973 | -0.0111617 | 0.0022763  |
| Middle | Audience outdegree/total outdegree | 4   | -0.0026761 | 0.0016133 | -0.0066946 | 0.0013425  |
| Middle | Audience outdegree/total outdegree | 5   | -0.0011758 | 0.0016443 | -0.0052717 | 0.0029201  |
| Middle | Audience outdegree/total outdegree | 6   | -0.0042308 | 0.0027773 | -0.0111490 | 0.0026874  |
| Middle | Audience outdegree/total outdegree | 7   | 0.0010055  | 0.0016615 | -0.0031332 | 0.0051442  |
| Middle | Audience outdegree/total outdegree | 8   | -0.0031238 | 0.0028137 | -0.0101326 | 0.0038849  |
| Middle | Audience outdegree/total outdegree | 9   | -0.0063456 | 0.0026572 | -0.0129646 | 0.0002733  |
| Middle | Audience outdegree/total outdegree | 10  | -0.0056173 | 0.0019782 | -0.0105449 | -0.0006897 |
| Middle | Audience outdegree/total outdegree | 11  | -0.0027328 | 0.0011496 | -0.0055964 | 0.0001308  |
| Middle | Audience outdegree/total outdegree | 12  | -0.0034191 | 0.0027750 | -0.0103314 | 0.0034932  |
| Middle | Audience outdegree/total outdegree | 13  | -0.0067031 | 0.0027147 | -0.0134652 | 0.0000591  |
| Middle | Audience outdegree/total outdegree | 14  | 0.0009141  | 0.0014649 | -0.0027349 | 0.0045631  |
| Middle | Audience outdegree/total outdegree | 15  | -0.0051826 | 0.0020216 | -0.0102183 | -0.0001469 |
| Middle | Audience outdegree/total outdegree | 16  | 0.0013230  | 0.0033671 | -0.0070643 | 0.0097102  |
| Middle | Audience outdegree/total outdegree | 17  | -0.0032383 | 0.0047006 | -0.0149472 | 0.0084706  |
| Middle | Audience outdegree/total outdegree | 18  | 0.0018935  | 0.0066903 | -0.0147716 | 0.0185587  |
| Middle | Audience outdegree/total outdegree | 19  | -0.0015816 | 0.0064288 | -0.0175956 | 0.0144324  |
| Middle | Audience outdegree/total outdegree | 20  | 0.0042035  | 0.0093004 | -0.0189634 | 0.0273705  |
| Middle | Audience outdegree/total outdegree | 21  | -0.0019179 | 0.0042962 | -0.0126195 | 0.0087837  |
| Middle | Audience outdegree/total outdegree | 22  | 0.0101584  | 0.0063637 | -0.0056934 | 0.0260101  |
| Middle | Audience outdegree/total outdegree | 23  | -0.0016946 | 0.0061496 | -0.0170131 | 0.0136238  |
| Middle | Audience outdegree/total outdegree | 24  | 0.0036004  | 0.0038290 | -0.0059374 | 0.0131383  |
| Middle | Audience outdegree/total outdegree | 25  | -0.0025140 | 0.0064375 | -0.0185496 | 0.0135215  |
| Middle | Audience outdegree/total outdegree | 26  | -0.0043367 | 0.0025882 | -0.0107839 | 0.0021104  |

|        |                                    |    |            |           |            |           |
|--------|------------------------------------|----|------------|-----------|------------|-----------|
| Middle | Audience outdegree/total outdegree | 27 | -0.0046634 | 0.0037263 | -0.0139455 | 0.0046186 |
| Middle | Audience outdegree/total outdegree | 28 | -0.0011730 | 0.0052114 | -0.0141544 | 0.0118084 |
| Middle | Audience outdegree/total outdegree | 29 | -0.0003892 | 0.0034956 | -0.0090966 | 0.0083181 |
| Middle | Audience outdegree/total outdegree | 30 | -0.0036597 | 0.0027513 | -0.0105131 | 0.0031937 |

| sample | outcome                            | event.time | estimate   | std.error | conf.low   | conf.high  |
|--------|------------------------------------|------------|------------|-----------|------------|------------|
| Least  | Audience outdegree/total outdegree | -30        | 0.0020425  | 0.0017174 | -0.0022997 | 0.0063847  |
| Least  | Audience outdegree/total outdegree | -29        | -0.0062517 | 0.0016869 | -0.0105169 | -0.0019865 |
| Least  | Audience outdegree/total outdegree | -28        | -0.0009848 | 0.0016250 | -0.0050934 | 0.0031238  |
| Least  | Audience outdegree/total outdegree | -27        | 0.0054880  | 0.0016055 | 0.0014287  | 0.0095473  |
| Least  | Audience outdegree/total outdegree | -26        | -0.1312537 | 0.1467143 | -0.5022057 | 0.2396982  |
| Least  | Audience outdegree/total outdegree | -25        | 0.1291651  | 0.1475898 | -0.2440005 | 0.5023306  |
| Least  | Audience outdegree/total outdegree | -24        | 0.0014435  | 0.0016338 | -0.0026874 | 0.0055744  |
| Least  | Audience outdegree/total outdegree | -23        | -0.0057674 | 0.0016207 | -0.0098651 | -0.0016697 |
| Least  | Audience outdegree/total outdegree | -22        | 0.0069945  | 0.0011663 | 0.0040457  | 0.0099433  |
| Least  | Audience outdegree/total outdegree | -21        | -0.0059957 | 0.0022923 | -0.0117915 | -0.0001998 |
| Least  | Audience outdegree/total outdegree | -20        | 0.0010077  | 0.0014104 | -0.0025583 | 0.0045737  |
| Least  | Audience outdegree/total outdegree | -19        | -0.0039491 | 0.0010369 | -0.0065708 | -0.0013274 |
| Least  | Audience outdegree/total outdegree | -18        | 0.0000050  | 0.0012530 | -0.0031630 | 0.0031730  |
| Least  | Audience outdegree/total outdegree | -17        | 0.0012229  | 0.0020239 | -0.0038943 | 0.0063400  |
| Least  | Audience outdegree/total outdegree | -16        | -0.0031879 | 0.0027494 | -0.0101394 | 0.0037636  |
| Least  | Audience outdegree/total outdegree | -15        | 0.0030077  | 0.0013861 | -0.0004969 | 0.0065122  |
| Least  | Audience outdegree/total outdegree | -14        | -0.0040859 | 0.0010303 | -0.0066909 | -0.0014809 |
| Least  | Audience outdegree/total outdegree | -13        | 0.1583110  | 0.1746688 | -0.2833211 | 0.5999430  |
| Least  | Audience outdegree/total outdegree | -12        | -0.1608497 | 0.1737992 | -0.6002828 | 0.2785835  |
| Least  | Audience outdegree/total outdegree | -11        | 0.0033221  | 0.0010214 | 0.0007397  | 0.0059045  |
| Least  | Audience outdegree/total outdegree | -10        | -0.0029374 | 0.0008134 | -0.0049940 | -0.0008809 |
| Least  | Audience outdegree/total outdegree | -9         | -0.0173053 | 0.0218536 | -0.0725600 | 0.0379493  |
| Least  | Audience outdegree/total outdegree | -8         | 0.0183159  | 0.0217766 | -0.0367441 | 0.0733759  |
| Least  | Audience outdegree/total outdegree | -7         | -0.0045738 | 0.0022581 | -0.0102832 | 0.0011356  |
| Least  | Audience outdegree/total outdegree | -6         | -0.0005546 | 0.0024546 | -0.0067608 | 0.0056516  |
| Least  | Audience outdegree/total outdegree | -5         | 0.0012719  | 0.0011001 | -0.0015096 | 0.0040534  |
| Least  | Audience outdegree/total outdegree | -4         | 0.0003391  | 0.0014292 | -0.0032745 | 0.0039526  |
| Least  | Audience outdegree/total outdegree | -3         | -0.0001908 | 0.0013488 | -0.0036011 | 0.0032194  |
| Least  | Audience outdegree/total outdegree | -2         | -0.0001313 | 0.0010680 | -0.0028315 | 0.0025690  |
| Least  | Audience outdegree/total outdegree | -1         | -0.0003986 | 0.0015673 | -0.0043613 | 0.0035641  |
| Least  | Audience outdegree/total outdegree | 0          | 0.1546419  | 0.1748957 | -0.2875638 | 0.5968475  |
| Least  | Audience outdegree/total outdegree | 1          | -0.0030864 | 0.0020667 | -0.0083120 | 0.0021391  |
| Least  | Audience outdegree/total outdegree | 2          | -0.0029502 | 0.0013065 | -0.0062535 | 0.0003531  |
| Least  | Audience outdegree/total outdegree | 3          | -0.0026904 | 0.0015252 | -0.0065467 | 0.0011658  |
| Least  | Audience outdegree/total outdegree | 4          | -0.0032953 | 0.0023479 | -0.0092317 | 0.0026411  |

|       |                                    |    |            |           |            |            |
|-------|------------------------------------|----|------------|-----------|------------|------------|
| Least | Audience outdegree/total outdegree | 5  | 0.0004825  | 0.0018032 | -0.0040768 | 0.0050418  |
| Least | Audience outdegree/total outdegree | 6  | -0.0017860 | 0.0023957 | -0.0078432 | 0.0042712  |
| Least | Audience outdegree/total outdegree | 7  | -0.0039994 | 0.0024116 | -0.0100968 | 0.0020980  |
| Least | Audience outdegree/total outdegree | 8  | -0.0036165 | 0.0015092 | -0.0074323 | 0.0001992  |
| Least | Audience outdegree/total outdegree | 9  | -0.0054258 | 0.0015042 | -0.0092291 | -0.0016224 |
| Least | Audience outdegree/total outdegree | 10 | -0.0038057 | 0.0022443 | -0.0094802 | 0.0018688  |
| Least | Audience outdegree/total outdegree | 11 | -0.0024657 | 0.0014209 | -0.0060584 | 0.0011269  |
| Least | Audience outdegree/total outdegree | 12 | -0.0038252 | 0.0021466 | -0.0092526 | 0.0016022  |
| Least | Audience outdegree/total outdegree | 13 | -0.0064945 | 0.0028571 | -0.0137183 | 0.0007293  |
| Least | Audience outdegree/total outdegree | 14 | -0.0096609 | 0.0018019 | -0.0142168 | -0.0051050 |
| Least | Audience outdegree/total outdegree | 15 | -0.0096299 | 0.0053974 | -0.0232767 | 0.0040168  |
| Least | Audience outdegree/total outdegree | 16 | -0.0074237 | 0.0017976 | -0.0119688 | -0.0028787 |
| Least | Audience outdegree/total outdegree | 17 | -0.0140518 | 0.0033702 | -0.0225731 | -0.0055305 |
| Least | Audience outdegree/total outdegree | 18 | -0.0089118 | 0.0028974 | -0.0162376 | -0.0015859 |
| Least | Audience outdegree/total outdegree | 19 | -0.0123616 | 0.0033288 | -0.0207782 | -0.0039451 |
| Least | Audience outdegree/total outdegree | 20 | -0.0115493 | 0.0027318 | -0.0184564 | -0.0046422 |
| Least | Audience outdegree/total outdegree | 21 | -0.0097239 | 0.0021028 | -0.0150406 | -0.0044072 |
| Least | Audience outdegree/total outdegree | 22 | -0.0091731 | 0.0013949 | -0.0126998 | -0.0056463 |
| Least | Audience outdegree/total outdegree | 23 | -0.0093840 | 0.0041844 | -0.0199639 | 0.0011959  |
| Least | Audience outdegree/total outdegree | 24 | -0.0164109 | 0.0038047 | -0.0260308 | -0.0067910 |
| Least | Audience outdegree/total outdegree | 25 | -0.0136969 | 0.0030737 | -0.0214685 | -0.0059254 |
| Least | Audience outdegree/total outdegree | 26 | -0.0149588 | 0.0046483 | -0.0267115 | -0.0032060 |
| Least | Audience outdegree/total outdegree | 27 | -0.0139688 | 0.0025862 | -0.0205078 | -0.0074299 |
| Least | Audience outdegree/total outdegree | 28 | -0.0174576 | 0.0068731 | -0.0348355 | -0.0000797 |
| Least | Audience outdegree/total outdegree | 29 | -0.0138599 | 0.0068048 | -0.0310653 | 0.0033454  |
| Least | Audience outdegree/total outdegree | 30 | -0.0155527 | 0.0084120 | -0.0368215 | 0.0057161  |



## Audience indegree/total indegree

Average effect by length of exposure (Callaway and Sant'Anna)

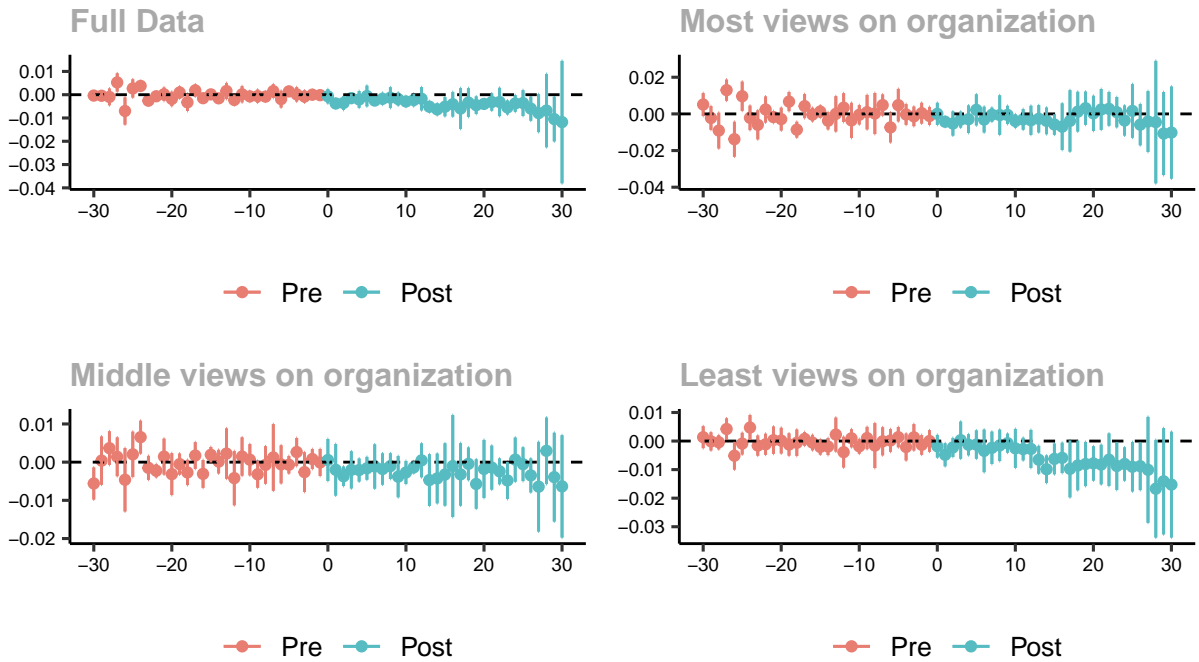

Long timeframe with sampled control groups

| sample | outcome                          | event.time | estimate   | std.error | conf.low   | conf.high  |
|--------|----------------------------------|------------|------------|-----------|------------|------------|
| Full   | Audience indegree/total indegree | -30        | -0.0003695 | 0.0005335 | -0.0016935 | 0.0009545  |
| Full   | Audience indegree/total indegree | -29        | -0.0004493 | 0.0005217 | -0.0017441 | 0.0008455  |
| Full   | Audience indegree/total indegree | -28        | -0.0009482 | 0.0014429 | -0.0045292 | 0.0026328  |
| Full   | Audience indegree/total indegree | -27        | 0.0052742  | 0.0015710 | 0.0013752  | 0.0091731  |
| Full   | Audience indegree/total indegree | -26        | -0.0070005 | 0.0023434 | -0.0128164 | -0.0011845 |
| Full   | Audience indegree/total indegree | -25        | 0.0026972  | 0.0015765 | -0.0012156 | 0.0066099  |
| Full   | Audience indegree/total indegree | -24        | 0.0037815  | 0.0008342 | 0.0017110  | 0.0058519  |
| Full   | Audience indegree/total indegree | -23        | -0.0025734 | 0.0007643 | -0.0044704 | -0.0006763 |
| Full   | Audience indegree/total indegree | -22        | -0.0006681 | 0.0005198 | -0.0019583 | 0.0006221  |
| Full   | Audience indegree/total indegree | -21        | 0.0001885  | 0.0011658 | -0.0027049 | 0.0030819  |
| Full   | Audience indegree/total indegree | -20        | -0.0018150 | 0.0012532 | -0.0049253 | 0.0012952  |
| Full   | Audience indegree/total indegree | -19        | 0.0009568  | 0.0010419 | -0.0016291 | 0.0035427  |
| Full   | Audience indegree/total indegree | -18        | -0.0032768 | 0.0014976 | -0.0069936 | 0.0004399  |
| Full   | Audience indegree/total indegree | -17        | 0.0018522  | 0.0010492 | -0.0007518 | 0.0044562  |
| Full   | Audience indegree/total indegree | -16        | -0.0014890 | 0.0005626 | -0.0028854 | -0.0000927 |
| Full   | Audience indegree/total indegree | -15        | 0.0001358  | 0.0004667 | -0.0010226 | 0.0012942  |
| Full   | Audience indegree/total indegree | -14        | -0.0015438 | 0.0006297 | -0.0031066 | 0.0000191  |
| Full   | Audience indegree/total indegree | -13        | 0.0015915  | 0.0013854 | -0.0018469 | 0.0050299  |
| Full   | Audience indegree/total indegree | -12        | -0.0022448 | 0.0009239 | -0.0045378 | 0.0000482  |

|      |                                  |     |            |           |            |            |
|------|----------------------------------|-----|------------|-----------|------------|------------|
| Full | Audience indegree/total indegree | -11 | 0.0001791  | 0.0013976 | -0.0032895 | 0.0036477  |
| Full | Audience indegree/total indegree | -10 | -0.0007089 | 0.0009329 | -0.0030243 | 0.0016065  |
| Full | Audience indegree/total indegree | -9  | -0.0006105 | 0.0011341 | -0.0034252 | 0.0022043  |
| Full | Audience indegree/total indegree | -8  | -0.0008131 | 0.0008737 | -0.0029816 | 0.0013555  |
| Full | Audience indegree/total indegree | -7  | 0.0015400  | 0.0011852 | -0.0014016 | 0.0044816  |
| Full | Audience indegree/total indegree | -6  | -0.0018961 | 0.0014558 | -0.0055091 | 0.0017170  |
| Full | Audience indegree/total indegree | -5  | 0.0014285  | 0.0007297 | -0.0003826 | 0.0032397  |
| Full | Audience indegree/total indegree | -4  | 0.0001444  | 0.0012394 | -0.0029316 | 0.0032204  |
| Full | Audience indegree/total indegree | -3  | -0.0007844 | 0.0010521 | -0.0033956 | 0.0018267  |
| Full | Audience indegree/total indegree | -2  | 0.0000066  | 0.0008132 | -0.0020116 | 0.0020249  |
| Full | Audience indegree/total indegree | -1  | -0.0001948 | 0.0007620 | -0.0020859 | 0.0016963  |
| Full | Audience indegree/total indegree | 0   | -0.0006832 | 0.0012346 | -0.0037475 | 0.0023810  |
| Full | Audience indegree/total indegree | 1   | -0.0037674 | 0.0007961 | -0.0057432 | -0.0017917 |
| Full | Audience indegree/total indegree | 2   | -0.0035694 | 0.0011875 | -0.0065166 | -0.0006222 |
| Full | Audience indegree/total indegree | 3   | -0.0014714 | 0.0007985 | -0.0034533 | 0.0005104  |
| Full | Audience indegree/total indegree | 4   | -0.0020294 | 0.0014421 | -0.0056084 | 0.0015496  |
| Full | Audience indegree/total indegree | 5   | -0.0005667 | 0.0017981 | -0.0050294 | 0.0038959  |
| Full | Audience indegree/total indegree | 6   | -0.0025156 | 0.0006593 | -0.0041518 | -0.0008793 |
| Full | Audience indegree/total indegree | 7   | -0.0017621 | 0.0010348 | -0.0043303 | 0.0008061  |
| Full | Audience indegree/total indegree | 8   | -0.0012607 | 0.0017964 | -0.0057192 | 0.0031977  |
| Full | Audience indegree/total indegree | 9   | -0.0018637 | 0.0011207 | -0.0046450 | 0.0009177  |
| Full | Audience indegree/total indegree | 10  | -0.0029021 | 0.0009313 | -0.0052134 | -0.0005907 |
| Full | Audience indegree/total indegree | 11  | -0.0022807 | 0.0010834 | -0.0049697 | 0.0004082  |
| Full | Audience indegree/total indegree | 12  | -0.0017487 | 0.0020045 | -0.0067236 | 0.0032262  |
| Full | Audience indegree/total indegree | 13  | -0.0051501 | 0.0009714 | -0.0075611 | -0.0027392 |
| Full | Audience indegree/total indegree | 14  | -0.0062847 | 0.0010200 | -0.0088163 | -0.0037531 |
| Full | Audience indegree/total indegree | 15  | -0.0051656 | 0.0016560 | -0.0092756 | -0.0010556 |
| Full | Audience indegree/total indegree | 16  | -0.0040962 | 0.0021281 | -0.0093779 | 0.0011855  |
| Full | Audience indegree/total indegree | 17  | -0.0059358 | 0.0035249 | -0.0146841 | 0.0028126  |
| Full | Audience indegree/total indegree | 18  | -0.0033609 | 0.0024903 | -0.0095414 | 0.0028196  |
| Full | Audience indegree/total indegree | 19  | -0.0044947 | 0.0015171 | -0.0082600 | -0.0007294 |
| Full | Audience indegree/total indegree | 20  | -0.0039487 | 0.0007667 | -0.0058516 | -0.0020459 |
| Full | Audience indegree/total indegree | 21  | -0.0031397 | 0.0014917 | -0.0068418 | 0.0005625  |
| Full | Audience indegree/total indegree | 22  | -0.0031263 | 0.0024502 | -0.0092073 | 0.0029547  |
| Full | Audience indegree/total indegree | 23  | -0.0054561 | 0.0012108 | -0.0084612 | -0.0024510 |
| Full | Audience indegree/total indegree | 24  | -0.0037539 | 0.0014465 | -0.0073440 | -0.0001637 |
| Full | Audience indegree/total indegree | 25  | -0.0035876 | 0.0022306 | -0.0091238 | 0.0019485  |
| Full | Audience indegree/total indegree | 26  | -0.0059789 | 0.0020835 | -0.0111498 | -0.0008080 |
| Full | Audience indegree/total indegree | 27  | -0.0079053 | 0.0032875 | -0.0160644 | 0.0002538  |
| Full | Audience indegree/total indegree | 28  | -0.0068234 | 0.0063388 | -0.0225556 | 0.0089088  |
| Full | Audience indegree/total indegree | 29  | -0.0104583 | 0.0038604 | -0.0200395 | -0.0008772 |

|      |                                  |    |            |           |            |           |
|------|----------------------------------|----|------------|-----------|------------|-----------|
| Full | Audience indegree/total indegree | 30 | -0.0117614 | 0.0105934 | -0.0380530 | 0.0145301 |
|------|----------------------------------|----|------------|-----------|------------|-----------|

| sample | outcome                          | event.time | estimate   | std.error | conf.low   | conf.high  |
|--------|----------------------------------|------------|------------|-----------|------------|------------|
| Most   | Audience indegree/total indegree | -30        | 0.0051061  | 0.0024623 | -0.0011087 | 0.0113209  |
| Most   | Audience indegree/total indegree | -29        | -0.0022227 | 0.0025584 | -0.0086800 | 0.0042347  |
| Most   | Audience indegree/total indegree | -28        | -0.0091023 | 0.0038574 | -0.0188382 | 0.0006336  |
| Most   | Audience indegree/total indegree | -27        | 0.0129531  | 0.0022757 | 0.0072093  | 0.0186968  |
| Most   | Audience indegree/total indegree | -26        | -0.0138073 | 0.0037653 | -0.0233108 | -0.0043039 |
| Most   | Audience indegree/total indegree | -25        | 0.0096368  | 0.0031571 | 0.0016682  | 0.0176054  |
| Most   | Audience indegree/total indegree | -24        | -0.0021528 | 0.0026456 | -0.0088304 | 0.0045247  |
| Most   | Audience indegree/total indegree | -23        | -0.0059585 | 0.0031382 | -0.0138793 | 0.0019624  |
| Most   | Audience indegree/total indegree | -22        | 0.0024013  | 0.0028092 | -0.0046891 | 0.0094918  |
| Most   | Audience indegree/total indegree | -21        | -0.0017251 | 0.0012882 | -0.0049764 | 0.0015263  |
| Most   | Audience indegree/total indegree | -20        | -0.0028415 | 0.0024598 | -0.0090501 | 0.0033671  |
| Most   | Audience indegree/total indegree | -19        | 0.0067133  | 0.0020673 | 0.0014956  | 0.0119311  |
| Most   | Audience indegree/total indegree | -18        | -0.0086060 | 0.0017061 | -0.0129123 | -0.0042998 |
| Most   | Audience indegree/total indegree | -17        | 0.0042448  | 0.0025967 | -0.0023092 | 0.0107988  |
| Most   | Audience indegree/total indegree | -16        | -0.0003576 | 0.0014704 | -0.0040688 | 0.0033537  |
| Most   | Audience indegree/total indegree | -15        | 0.0012618  | 0.0013192 | -0.0020679 | 0.0045915  |
| Most   | Audience indegree/total indegree | -14        | -0.0037223 | 0.0018729 | -0.0084495 | 0.0010049  |
| Most   | Audience indegree/total indegree | -13        | 0.0000102  | 0.0038159 | -0.0096212 | 0.0096416  |
| Most   | Audience indegree/total indegree | -12        | 0.0034154  | 0.0031078 | -0.0044286 | 0.0112593  |
| Most   | Audience indegree/total indegree | -11        | -0.0035499 | 0.0037996 | -0.0131401 | 0.0060403  |
| Most   | Audience indegree/total indegree | -10        | -0.0004834 | 0.0020931 | -0.0057664 | 0.0047995  |
| Most   | Audience indegree/total indegree | -9         | 0.0009407  | 0.0037245 | -0.0084599 | 0.0103413  |
| Most   | Audience indegree/total indegree | -8         | 0.0002076  | 0.0044377 | -0.0109930 | 0.0114082  |
| Most   | Audience indegree/total indegree | -7         | 0.0048206  | 0.0022779 | -0.0009287 | 0.0105698  |
| Most   | Audience indegree/total indegree | -6         | -0.0073662 | 0.0032330 | -0.0155263 | 0.0007939  |
| Most   | Audience indegree/total indegree | -5         | 0.0047680  | 0.0035097 | -0.0040904 | 0.0136263  |
| Most   | Audience indegree/total indegree | -4         | -0.0003029 | 0.0022324 | -0.0059373 | 0.0053315  |
| Most   | Audience indegree/total indegree | -3         | -0.0013527 | 0.0021162 | -0.0066939 | 0.0039886  |
| Most   | Audience indegree/total indegree | -2         | 0.0004036  | 0.0022390 | -0.0052476 | 0.0060548  |
| Most   | Audience indegree/total indegree | -1         | -0.0011416 | 0.0019529 | -0.0060706 | 0.0037874  |
| Most   | Audience indegree/total indegree | 0          | 0.0000297  | 0.0023864 | -0.0059936 | 0.0060530  |
| Most   | Audience indegree/total indegree | 1          | -0.0042820 | 0.0011059 | -0.0070733 | -0.0014906 |
| Most   | Audience indegree/total indegree | 2          | -0.0052479 | 0.0026116 | -0.0118396 | 0.0013438  |
| Most   | Audience indegree/total indegree | 3          | -0.0031108 | 0.0017300 | -0.0074773 | 0.0012558  |
| Most   | Audience indegree/total indegree | 4          | -0.0029043 | 0.0029699 | -0.0104004 | 0.0045918  |
| Most   | Audience indegree/total indegree | 5          | 0.0022114  | 0.0033566 | -0.0062605 | 0.0106833  |
| Most   | Audience indegree/total indegree | 6          | -0.0030977 | 0.0027858 | -0.0101290 | 0.0039335  |
| Most   | Audience indegree/total indegree | 7          | -0.0004435 | 0.0015284 | -0.0043012 | 0.0034142  |

|      |                                  |    |            |           |            |            |
|------|----------------------------------|----|------------|-----------|------------|------------|
| Most | Audience indegree/total indegree | 8  | -0.0006308 | 0.0042594 | -0.0113814 | 0.0101197  |
| Most | Audience indegree/total indegree | 9  | -0.0005680 | 0.0019726 | -0.0055469 | 0.0044109  |
| Most | Audience indegree/total indegree | 10 | -0.0038992 | 0.0014652 | -0.0075974 | -0.0002010 |
| Most | Audience indegree/total indegree | 11 | -0.0029937 | 0.0022293 | -0.0086203 | 0.0026330  |
| Most | Audience indegree/total indegree | 12 | -0.0034813 | 0.0031406 | -0.0114082 | 0.0044457  |
| Most | Audience indegree/total indegree | 13 | -0.0026731 | 0.0029425 | -0.0100998 | 0.0047536  |
| Most | Audience indegree/total indegree | 14 | -0.0038122 | 0.0028773 | -0.0110744 | 0.0034501  |
| Most | Audience indegree/total indegree | 15 | -0.0057754 | 0.0022217 | -0.0113829 | -0.0001679 |
| Most | Audience indegree/total indegree | 16 | -0.0069720 | 0.0050263 | -0.0196582 | 0.0057142  |
| Most | Audience indegree/total indegree | 17 | -0.0038157 | 0.0066339 | -0.0205595 | 0.0129281  |
| Most | Audience indegree/total indegree | 18 | 0.0012263  | 0.0042933 | -0.0096099 | 0.0120626  |
| Most | Audience indegree/total indegree | 19 | 0.0031064  | 0.0035895 | -0.0059535 | 0.0121662  |
| Most | Audience indegree/total indegree | 20 | 0.0002960  | 0.0037965 | -0.0092862 | 0.0098782  |
| Most | Audience indegree/total indegree | 21 | 0.0024229  | 0.0044025 | -0.0086890 | 0.0135349  |
| Most | Audience indegree/total indegree | 22 | 0.0027593  | 0.0036427 | -0.0064349 | 0.0119535  |
| Most | Audience indegree/total indegree | 23 | 0.0009237  | 0.0032663 | -0.0073203 | 0.0091678  |
| Most | Audience indegree/total indegree | 24 | -0.0036129 | 0.0032465 | -0.0118071 | 0.0045813  |
| Most | Audience indegree/total indegree | 25 | 0.0016192  | 0.0057867 | -0.0129864 | 0.0162248  |
| Most | Audience indegree/total indegree | 26 | -0.0058745 | 0.0044632 | -0.0171395 | 0.0053904  |
| Most | Audience indegree/total indegree | 27 | -0.0041605 | 0.0065660 | -0.0207330 | 0.0124120  |
| Most | Audience indegree/total indegree | 28 | -0.0044707 | 0.0132311 | -0.0378657 | 0.0289243  |
| Most | Audience indegree/total indegree | 29 | -0.0107222 | 0.0089740 | -0.0333724 | 0.0119279  |
| Most | Audience indegree/total indegree | 30 | -0.0101957 | 0.0099398 | -0.0352834 | 0.0148921  |

| sample | outcome                          | event.time | estimate   | std.error | conf.low   | conf.high  |
|--------|----------------------------------|------------|------------|-----------|------------|------------|
| Middle | Audience indegree/total indegree | -30        | -0.0055885 | 0.0015895 | -0.0097835 | -0.0013935 |
| Middle | Audience indegree/total indegree | -29        | 0.0003933  | 0.0023888 | -0.0059112 | 0.0066978  |
| Middle | Audience indegree/total indegree | -28        | 0.0036654  | 0.0016659 | -0.0007312 | 0.0080620  |
| Middle | Audience indegree/total indegree | -27        | 0.0013965  | 0.0019218 | -0.0036755 | 0.0064685  |
| Middle | Audience indegree/total indegree | -26        | -0.0046130 | 0.0031406 | -0.0129018 | 0.0036757  |
| Middle | Audience indegree/total indegree | -25        | 0.0020461  | 0.0022454 | -0.0038800 | 0.0079721  |
| Middle | Audience indegree/total indegree | -24        | 0.0065454  | 0.0016276 | 0.0022497  | 0.0108411  |
| Middle | Audience indegree/total indegree | -23        | -0.0014896 | 0.0011863 | -0.0046204 | 0.0016413  |
| Middle | Audience indegree/total indegree | -22        | -0.0022471 | 0.0006590 | -0.0039864 | -0.0005077 |
| Middle | Audience indegree/total indegree | -21        | 0.0014518  | 0.0017774 | -0.0032392 | 0.0061428  |
| Middle | Audience indegree/total indegree | -20        | -0.0031422 | 0.0020732 | -0.0086138 | 0.0023294  |
| Middle | Audience indegree/total indegree | -19        | -0.0005100 | 0.0010461 | -0.0032708 | 0.0022508  |
| Middle | Audience indegree/total indegree | -18        | -0.0027009 | 0.0012526 | -0.0060067 | 0.0006049  |
| Middle | Audience indegree/total indegree | -17        | 0.0017301  | 0.0013201 | -0.0017540 | 0.0052141  |
| Middle | Audience indegree/total indegree | -16        | -0.0030764 | 0.0013784 | -0.0067143 | 0.0005615  |
| Middle | Audience indegree/total indegree | -15        | 0.0019334  | 0.0007691 | -0.0000965 | 0.0039632  |

|        |                                  |     |            |           |            |            |
|--------|----------------------------------|-----|------------|-----------|------------|------------|
| Middle | Audience indegree/total indegree | -14 | 0.0001420  | 0.0011697 | -0.0029450 | 0.0032290  |
| Middle | Audience indegree/total indegree | -13 | 0.0022434  | 0.0024903 | -0.0043292 | 0.0088159  |
| Middle | Audience indegree/total indegree | -12 | -0.0041856 | 0.0026895 | -0.0112836 | 0.0029124  |
| Middle | Audience indegree/total indegree | -11 | 0.0014691  | 0.0018979 | -0.0035399 | 0.0064782  |
| Middle | Audience indegree/total indegree | -10 | 0.0006329  | 0.0015491 | -0.0034556 | 0.0047214  |
| Middle | Audience indegree/total indegree | -9  | -0.0031778 | 0.0013300 | -0.0066880 | 0.0003324  |
| Middle | Audience indegree/total indegree | -8  | -0.0007355 | 0.0018544 | -0.0056296 | 0.0041587  |
| Middle | Audience indegree/total indegree | -7  | 0.0012317  | 0.0032993 | -0.0074759 | 0.0099393  |
| Middle | Audience indegree/total indegree | -6  | -0.0005761 | 0.0018865 | -0.0055550 | 0.0044029  |
| Middle | Audience indegree/total indegree | -5  | -0.0006788 | 0.0008691 | -0.0029725 | 0.0016148  |
| Middle | Audience indegree/total indegree | -4  | 0.0026417  | 0.0013935 | -0.0010360 | 0.0063193  |
| Middle | Audience indegree/total indegree | -3  | -0.0026085 | 0.0019649 | -0.0077943 | 0.0025772  |
| Middle | Audience indegree/total indegree | -2  | 0.0008116  | 0.0009908 | -0.0018034 | 0.0034267  |
| Middle | Audience indegree/total indegree | -1  | -0.0000842 | 0.0013391 | -0.0036184 | 0.0034501  |
| Middle | Audience indegree/total indegree | 0   | 0.0005645  | 0.0020793 | -0.0049231 | 0.0060522  |
| Middle | Audience indegree/total indegree | 1   | -0.0020077 | 0.0025539 | -0.0087479 | 0.0047324  |
| Middle | Audience indegree/total indegree | 2   | -0.0036983 | 0.0009688 | -0.0062550 | -0.0011415 |
| Middle | Audience indegree/total indegree | 3   | -0.0020212 | 0.0018407 | -0.0068791 | 0.0028368  |
| Middle | Audience indegree/total indegree | 4   | -0.0020708 | 0.0011389 | -0.0050766 | 0.0009350  |
| Middle | Audience indegree/total indegree | 5   | -0.0016114 | 0.0011327 | -0.0046007 | 0.0013779  |
| Middle | Audience indegree/total indegree | 6   | -0.0011368 | 0.0021925 | -0.0069233 | 0.0046496  |
| Middle | Audience indegree/total indegree | 7   | -0.0017970 | 0.0015490 | -0.0058851 | 0.0022911  |
| Middle | Audience indegree/total indegree | 8   | -0.0010461 | 0.0012733 | -0.0044067 | 0.0023145  |
| Middle | Audience indegree/total indegree | 9   | -0.0038034 | 0.0020429 | -0.0091951 | 0.0015882  |
| Middle | Audience indegree/total indegree | 10  | -0.0027038 | 0.0011424 | -0.0057189 | 0.0003113  |
| Middle | Audience indegree/total indegree | 11  | -0.0013550 | 0.0005984 | -0.0029342 | 0.0002242  |
| Middle | Audience indegree/total indegree | 12  | 0.0004647  | 0.0016775 | -0.0039625 | 0.0048920  |
| Middle | Audience indegree/total indegree | 13  | -0.0046915 | 0.0025554 | -0.0114358 | 0.0020527  |
| Middle | Audience indegree/total indegree | 14  | -0.0042688 | 0.0024666 | -0.0107787 | 0.0022411  |
| Middle | Audience indegree/total indegree | 15  | -0.0032293 | 0.0030907 | -0.0113864 | 0.0049277  |
| Middle | Audience indegree/total indegree | 16  | -0.0010202 | 0.0050556 | -0.0143630 | 0.0123227  |
| Middle | Audience indegree/total indegree | 17  | -0.0032034 | 0.0030970 | -0.0113770 | 0.0049703  |
| Middle | Audience indegree/total indegree | 18  | -0.0004498 | 0.0016212 | -0.0047284 | 0.0038289  |
| Middle | Audience indegree/total indegree | 19  | -0.0057148 | 0.0024515 | -0.0121849 | 0.0007553  |
| Middle | Audience indegree/total indegree | 20  | -0.0017821 | 0.0028796 | -0.0093821 | 0.0058179  |
| Middle | Audience indegree/total indegree | 21  | -0.0014262 | 0.0021808 | -0.0071817 | 0.0043293  |
| Middle | Audience indegree/total indegree | 22  | -0.0024165 | 0.0012795 | -0.0057934 | 0.0009605  |
| Middle | Audience indegree/total indegree | 23  | -0.0047858 | 0.0018457 | -0.0096569 | 0.0000853  |
| Middle | Audience indegree/total indegree | 24  | 0.0006554  | 0.0021854 | -0.0051123 | 0.0064232  |
| Middle | Audience indegree/total indegree | 25  | -0.0005380 | 0.0016726 | -0.0049524 | 0.0038763  |
| Middle | Audience indegree/total indegree | 26  | -0.0034751 | 0.0016853 | -0.0079230 | 0.0009729  |

|        |                                  |    |            |           |            |           |
|--------|----------------------------------|----|------------|-----------|------------|-----------|
| Middle | Audience indegree/total indegree | 27 | -0.0064209 | 0.0044436 | -0.0181486 | 0.0053067 |
| Middle | Audience indegree/total indegree | 28 | 0.0029613  | 0.0032963 | -0.0057383 | 0.0116608 |
| Middle | Audience indegree/total indegree | 29 | -0.0039188 | 0.0044009 | -0.0155336 | 0.0076960 |
| Middle | Audience indegree/total indegree | 30 | -0.0063445 | 0.0050717 | -0.0197297 | 0.0070406 |

| sample | outcome                          | event.time | estimate   | std.error | conf.low   | conf.high  |
|--------|----------------------------------|------------|------------|-----------|------------|------------|
| Least  | Audience indegree/total indegree | -30        | 0.0013526  | 0.0014967 | -0.0024833 | 0.0051884  |
| Least  | Audience indegree/total indegree | -29        | -0.0001141 | 0.0012399 | -0.0032918 | 0.0030636  |
| Least  | Audience indegree/total indegree | -28        | -0.0004201 | 0.0009676 | -0.0028999 | 0.0020597  |
| Least  | Audience indegree/total indegree | -27        | 0.0042203  | 0.0014517 | 0.0004997  | 0.0079408  |
| Least  | Audience indegree/total indegree | -26        | -0.0051298 | 0.0018916 | -0.0099777 | -0.0002819 |
| Least  | Audience indegree/total indegree | -25        | -0.0009033 | 0.0014812 | -0.0046995 | 0.0028928  |
| Least  | Audience indegree/total indegree | -24        | 0.0047289  | 0.0017027 | 0.0003650  | 0.0090927  |
| Least  | Audience indegree/total indegree | -23        | -0.0015951 | 0.0013741 | -0.0051167 | 0.0019266  |
| Least  | Audience indegree/total indegree | -22        | -0.0011221 | 0.0014358 | -0.0048018 | 0.0025577  |
| Least  | Audience indegree/total indegree | -21        | 0.0003021  | 0.0018604 | -0.0044659 | 0.0050702  |
| Least  | Audience indegree/total indegree | -20        | 0.0001551  | 0.0017556 | -0.0043444 | 0.0046546  |
| Least  | Audience indegree/total indegree | -19        | -0.0012120 | 0.0015205 | -0.0051090 | 0.0026850  |
| Least  | Audience indegree/total indegree | -18        | -0.0005970 | 0.0017994 | -0.0052088 | 0.0040147  |
| Least  | Audience indegree/total indegree | -17        | 0.0007629  | 0.0009338 | -0.0016303 | 0.0031560  |
| Least  | Audience indegree/total indegree | -16        | -0.0005399 | 0.0010546 | -0.0032429 | 0.0021630  |
| Least  | Audience indegree/total indegree | -15        | -0.0020667 | 0.0010484 | -0.0047537 | 0.0006202  |
| Least  | Audience indegree/total indegree | -14        | -0.0019211 | 0.0011678 | -0.0049141 | 0.0010719  |
| Least  | Audience indegree/total indegree | -13        | 0.0022658  | 0.0023162 | -0.0036704 | 0.0082020  |
| Least  | Audience indegree/total indegree | -12        | -0.0038777 | 0.0020989 | -0.0092571 | 0.0015017  |
| Least  | Audience indegree/total indegree | -11        | 0.0009667  | 0.0012309 | -0.0021880 | 0.0041215  |
| Least  | Audience indegree/total indegree | -10        | -0.0018441 | 0.0010110 | -0.0044351 | 0.0007469  |
| Least  | Audience indegree/total indegree | -9         | 0.0010523  | 0.0015236 | -0.0028525 | 0.0049570  |
| Least  | Audience indegree/total indegree | -8         | -0.0015863 | 0.0030641 | -0.0094394 | 0.0062668  |
| Least  | Audience indegree/total indegree | -7         | -0.0000989 | 0.0019101 | -0.0049944 | 0.0047965  |
| Least  | Audience indegree/total indegree | -6         | 0.0001914  | 0.0015465 | -0.0037722 | 0.0041550  |
| Least  | Audience indegree/total indegree | -5         | 0.0013593  | 0.0013837 | -0.0021869 | 0.0049055  |
| Least  | Audience indegree/total indegree | -4         | -0.0020741 | 0.0018386 | -0.0067863 | 0.0026380  |
| Least  | Audience indegree/total indegree | -3         | 0.0013135  | 0.0018002 | -0.0033002 | 0.0059273  |
| Least  | Audience indegree/total indegree | -2         | -0.0013314 | 0.0013452 | -0.0047791 | 0.0021162  |
| Least  | Audience indegree/total indegree | -1         | 0.0000185  | 0.0014743 | -0.0037600 | 0.0037971  |
| Least  | Audience indegree/total indegree | 0          | -0.0018135 | 0.0015469 | -0.0057780 | 0.0021511  |
| Least  | Audience indegree/total indegree | 1          | -0.0048050 | 0.0015694 | -0.0088271 | -0.0007829 |
| Least  | Audience indegree/total indegree | 2          | -0.0022392 | 0.0012959 | -0.0055605 | 0.0010822  |
| Least  | Audience indegree/total indegree | 3          | 0.0003159  | 0.0025319 | -0.0061730 | 0.0068048  |
| Least  | Audience indegree/total indegree | 4          | -0.0013042 | 0.0014365 | -0.0049858 | 0.0023774  |

|       |                                  |    |            |           |            |            |
|-------|----------------------------------|----|------------|-----------|------------|------------|
| Least | Audience indegree/total indegree | 5  | -0.0012275 | 0.0019273 | -0.0061670 | 0.0037120  |
| Least | Audience indegree/total indegree | 6  | -0.0034393 | 0.0029099 | -0.0108971 | 0.0040185  |
| Least | Audience indegree/total indegree | 7  | -0.0023635 | 0.0022098 | -0.0080270 | 0.0033000  |
| Least | Audience indegree/total indegree | 8  | -0.0015165 | 0.0021426 | -0.0070077 | 0.0039748  |
| Least | Audience indegree/total indegree | 9  | -0.0007305 | 0.0012976 | -0.0040562 | 0.0025951  |
| Least | Audience indegree/total indegree | 10 | -0.0025570 | 0.0026531 | -0.0093566 | 0.0042426  |
| Least | Audience indegree/total indegree | 11 | -0.0028097 | 0.0015429 | -0.0067640 | 0.0011445  |
| Least | Audience indegree/total indegree | 12 | -0.0027621 | 0.0025965 | -0.0094166 | 0.0038924  |
| Least | Audience indegree/total indegree | 13 | -0.0065489 | 0.0019007 | -0.0114203 | -0.0016776 |
| Least | Audience indegree/total indegree | 14 | -0.0098658 | 0.0018782 | -0.0146795 | -0.0050522 |
| Least | Audience indegree/total indegree | 15 | -0.0062595 | 0.0020979 | -0.0116361 | -0.0008828 |
| Least | Audience indegree/total indegree | 16 | -0.0058868 | 0.0020703 | -0.0111929 | -0.0005808 |
| Least | Audience indegree/total indegree | 17 | -0.0097315 | 0.0038909 | -0.0197036 | 0.0002406  |
| Least | Audience indegree/total indegree | 18 | -0.0085443 | 0.0033877 | -0.0172267 | 0.0001382  |
| Least | Audience indegree/total indegree | 19 | -0.0080437 | 0.0030179 | -0.0157783 | -0.0003091 |
| Least | Audience indegree/total indegree | 20 | -0.0078204 | 0.0023416 | -0.0138218 | -0.0018190 |
| Least | Audience indegree/total indegree | 21 | -0.0082264 | 0.0027049 | -0.0151587 | -0.0012940 |
| Least | Audience indegree/total indegree | 22 | -0.0065314 | 0.0035848 | -0.0157190 | 0.0026562  |
| Least | Audience indegree/total indegree | 23 | -0.0087323 | 0.0032719 | -0.0171180 | -0.0003466 |
| Least | Audience indegree/total indegree | 24 | -0.0080291 | 0.0022704 | -0.0138480 | -0.0022103 |
| Least | Audience indegree/total indegree | 25 | -0.0090028 | 0.0033657 | -0.0176286 | -0.0003769 |
| Least | Audience indegree/total indegree | 26 | -0.0088023 | 0.0032644 | -0.0171686 | -0.0004360 |
| Least | Audience indegree/total indegree | 27 | -0.0100687 | 0.0072276 | -0.0285924 | 0.0084550  |
| Least | Audience indegree/total indegree | 28 | -0.0166807 | 0.0066669 | -0.0337673 | 0.0004060  |
| Least | Audience indegree/total indegree | 29 | -0.0140903 | 0.0072449 | -0.0326582 | 0.0044777  |
| Least | Audience indegree/total indegree | 30 | -0.0152519 | 0.0072205 | -0.0337573 | 0.0032534  |

## Hateful non-audience outdegree

Average effect by length of exposure (Callaway and Sant'Anna)

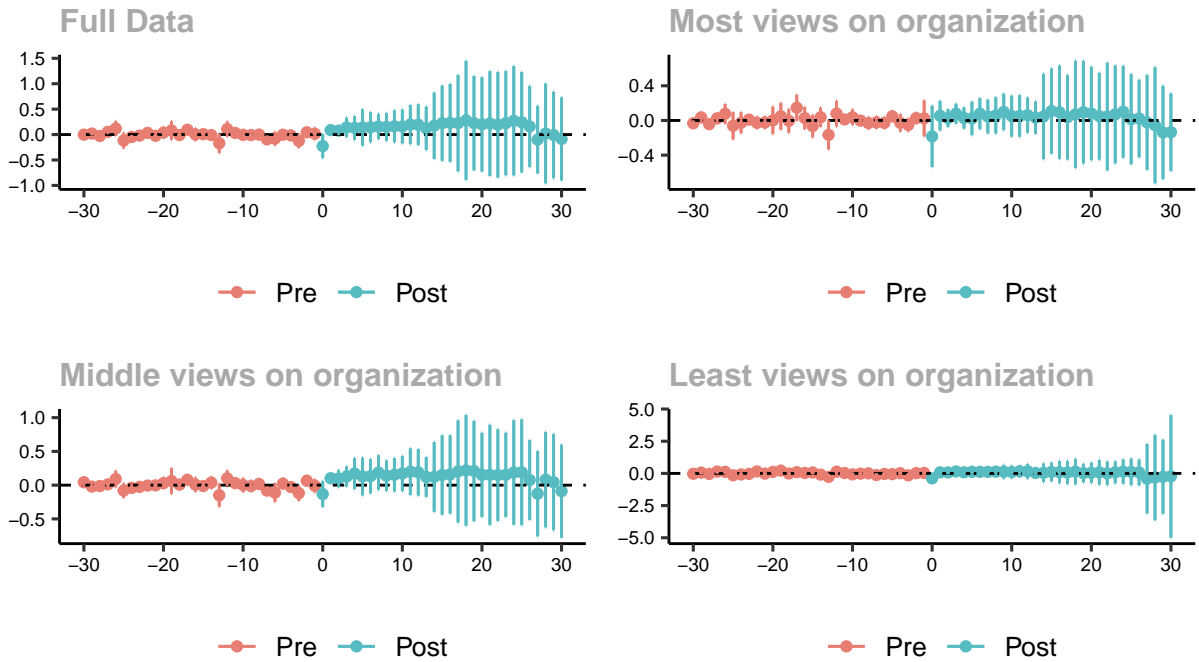

Long timeframe with sampled control groups

| sample | outcome                        | event.time | estimate   | std.error | conf.low   | conf.high  |
|--------|--------------------------------|------------|------------|-----------|------------|------------|
| Full   | Hateful non-audience outdegree | -30        | -0.0010026 | 0.0090371 | -0.0241285 | 0.0221232  |
| Full   | Hateful non-audience outdegree | -29        | 0.0198691  | 0.0114786 | -0.0095045 | 0.0492428  |
| Full   | Hateful non-audience outdegree | -28        | -0.0277488 | 0.0146235 | -0.0651704 | 0.0096728  |
| Full   | Hateful non-audience outdegree | -27        | 0.0536390  | 0.0181989 | 0.0070680  | 0.1002099  |
| Full   | Hateful non-audience outdegree | -26        | 0.1183808  | 0.0563204 | -0.0257428 | 0.2625045  |
| Full   | Hateful non-audience outdegree | -25        | -0.1167249 | 0.0600307 | -0.2703432 | 0.0368933  |
| Full   | Hateful non-audience outdegree | -24        | -0.0473248 | 0.0119598 | -0.0779300 | -0.0167196 |
| Full   | Hateful non-audience outdegree | -23        | -0.0195043 | 0.0135616 | -0.0542083 | 0.0151997  |
| Full   | Hateful non-audience outdegree | -22        | 0.0335431  | 0.0198120 | -0.0171557 | 0.0842420  |
| Full   | Hateful non-audience outdegree | -21        | -0.0243496 | 0.0304191 | -0.1021920 | 0.0534928  |
| Full   | Hateful non-audience outdegree | -20        | 0.0399735  | 0.0414927 | -0.0662062 | 0.1461532  |
| Full   | Hateful non-audience outdegree | -19        | 0.0806629  | 0.0703370 | -0.0993294 | 0.2606552  |
| Full   | Hateful non-audience outdegree | -18        | -0.0101040 | 0.0356213 | -0.1012589 | 0.0810508  |
| Full   | Hateful non-audience outdegree | -17        | 0.0944849  | 0.0328102 | 0.0105236  | 0.1784461  |
| Full   | Hateful non-audience outdegree | -16        | 0.0029871  | 0.0489000 | -0.1221478 | 0.1281219  |
| Full   | Hateful non-audience outdegree | -15        | 0.0077367  | 0.0248304 | -0.0558043 | 0.0712777  |
| Full   | Hateful non-audience outdegree | -14        | -0.0095350 | 0.0241436 | -0.0713184 | 0.0522483  |
| Full   | Hateful non-audience outdegree | -13        | -0.1705611 | 0.0747404 | -0.3618216 | 0.0206994  |
| Full   | Hateful non-audience outdegree | -12        | 0.1074015  | 0.0573370 | -0.0393236 | 0.2541267  |



|      |                                |     |            |           |            |            |
|------|--------------------------------|-----|------------|-----------|------------|------------|
| Full | Hateful non-audience outdegree | -11 | 0.0330295  | 0.0207357 | -0.0200332 | 0.0860922  |
| Full | Hateful non-audience outdegree | -10 | -0.0056527 | 0.0382161 | -0.1034475 | 0.0921422  |
| Full | Hateful non-audience outdegree | -9  | -0.0103942 | 0.0251406 | -0.0747288 | 0.0539403  |
| Full | Hateful non-audience outdegree | -8  | 0.0001629  | 0.0324980 | -0.0829994 | 0.0833253  |
| Full | Hateful non-audience outdegree | -7  | -0.0937808 | 0.0311036 | -0.1733747 | -0.0141868 |
| Full | Hateful non-audience outdegree | -6  | -0.0783988 | 0.0518488 | -0.2110798 | 0.0542821  |
| Full | Hateful non-audience outdegree | -5  | -0.0032879 | 0.0221634 | -0.0600040 | 0.0534281  |
| Full | Hateful non-audience outdegree | -4  | -0.0161436 | 0.0142462 | -0.0525997 | 0.0203125  |
| Full | Hateful non-audience outdegree | -3  | -0.1240112 | 0.0527211 | -0.2589243 | 0.0109018  |
| Full | Hateful non-audience outdegree | -2  | 0.0443274  | 0.0162339 | 0.0027849  | 0.0858698  |
| Full | Hateful non-audience outdegree | -1  | 0.0159246  | 0.0455678 | -0.1006832 | 0.1325323  |
| Full | Hateful non-audience outdegree | 0   | -0.2258392 | 0.0925410 | -0.4626512 | 0.0109728  |
| Full | Hateful non-audience outdegree | 1   | 0.0875227  | 0.0290446 | 0.0131977  | 0.1618477  |
| Full | Hateful non-audience outdegree | 2   | 0.0783229  | 0.0360829 | -0.0140130 | 0.1706588  |
| Full | Hateful non-audience outdegree | 3   | 0.1412158  | 0.0742533 | -0.0487981 | 0.3312297  |
| Full | Hateful non-audience outdegree | 4   | 0.1304009  | 0.0904738 | -0.1011212 | 0.3619230  |
| Full | Hateful non-audience outdegree | 5   | 0.1400046  | 0.1384409 | -0.2142651 | 0.4942743  |
| Full | Hateful non-audience outdegree | 6   | 0.1432880  | 0.1148160 | -0.1505258 | 0.4371019  |
| Full | Hateful non-audience outdegree | 7   | 0.1584017  | 0.0971625 | -0.0902368 | 0.4070401  |
| Full | Hateful non-audience outdegree | 8   | 0.1505413  | 0.1066130 | -0.1222811 | 0.4233637  |
| Full | Hateful non-audience outdegree | 9   | 0.1624769  | 0.1225313 | -0.1510804 | 0.4760342  |
| Full | Hateful non-audience outdegree | 10  | 0.1592269  | 0.1294671 | -0.1720790 | 0.4905327  |
| Full | Hateful non-audience outdegree | 11  | 0.1972649  | 0.1500986 | -0.1868368 | 0.5813667  |
| Full | Hateful non-audience outdegree | 12  | 0.1941477  | 0.1564363 | -0.2061724 | 0.5944678  |
| Full | Hateful non-audience outdegree | 13  | 0.1221645  | 0.1663188 | -0.3034447 | 0.5477737  |
| Full | Hateful non-audience outdegree | 14  | 0.1736281  | 0.2543224 | -0.4771821 | 0.8244384  |
| Full | Hateful non-audience outdegree | 15  | 0.2235521  | 0.2881849 | -0.5139121 | 0.9610162  |
| Full | Hateful non-audience outdegree | 16  | 0.2302570  | 0.2993288 | -0.5357245 | 0.9962384  |
| Full | Hateful non-audience outdegree | 17  | 0.2255165  | 0.3694399 | -0.7198792 | 1.1709122  |
| Full | Hateful non-audience outdegree | 18  | 0.2805921  | 0.4567048 | -0.8881140 | 1.4492983  |
| Full | Hateful non-audience outdegree | 19  | 0.2246571  | 0.3615287 | -0.7004938 | 1.1498080  |
| Full | Hateful non-audience outdegree | 20  | 0.2009118  | 0.3614791 | -0.7241120 | 1.1259356  |
| Full | Hateful non-audience outdegree | 21  | 0.2187991  | 0.4013798 | -0.8083305 | 1.2459287  |
| Full | Hateful non-audience outdegree | 22  | 0.1945264  | 0.4053063 | -0.8426512 | 1.2317040  |
| Full | Hateful non-audience outdegree | 23  | 0.2241848  | 0.3997401 | -0.7987488 | 1.2471184  |
| Full | Hateful non-audience outdegree | 24  | 0.2723007  | 0.4194627 | -0.8011030 | 1.3457044  |
| Full | Hateful non-audience outdegree | 25  | 0.2434047  | 0.3858144 | -0.7438932 | 1.2307026  |
| Full | Hateful non-audience outdegree | 26  | 0.1582290  | 0.3115745 | -0.6390892 | 0.9555472  |
| Full | Hateful non-audience outdegree | 27  | -0.0989934 | 0.2588636 | -0.7614245 | 0.5634376  |
| Full | Hateful non-audience outdegree | 28  | 0.0205928  | 0.3824831 | -0.9581804 | 0.9993660  |
| Full | Hateful non-audience outdegree | 29  | -0.0081501 | 0.3318237 | -0.8572860 | 0.8409858  |

|      |                                |    |            |           |            |           |
|------|--------------------------------|----|------------|-----------|------------|-----------|
| Full | Hateful non-audience outdegree | 30 | -0.0855155 | 0.3178017 | -0.8987691 | 0.7277381 |
|------|--------------------------------|----|------------|-----------|------------|-----------|

| sample | outcome                        | event.time | estimate   | std.error | conf.low   | conf.high  |
|--------|--------------------------------|------------|------------|-----------|------------|------------|
| Most   | Hateful non-audience outdegree | -30        | -0.0323929 | 0.0133021 | -0.0663054 | 0.0015196  |
| Most   | Hateful non-audience outdegree | -29        | 0.0354313  | 0.0236749 | -0.0249257 | 0.0957883  |
| Most   | Hateful non-audience outdegree | -28        | -0.0432753 | 0.0138371 | -0.0785517 | -0.0079989 |
| Most   | Hateful non-audience outdegree | -27        | 0.0244407  | 0.0229715 | -0.0341230 | 0.0830043  |
| Most   | Hateful non-audience outdegree | -26        | 0.0771240  | 0.0443447 | -0.0359286 | 0.1901767  |
| Most   | Hateful non-audience outdegree | -25        | -0.0614174 | 0.0613217 | -0.2177514 | 0.0949167  |
| Most   | Hateful non-audience outdegree | -24        | -0.0263325 | 0.0473146 | -0.1469569 | 0.0942918  |
| Most   | Hateful non-audience outdegree | -23        | 0.0096062  | 0.0132046 | -0.0240578 | 0.0432701  |
| Most   | Hateful non-audience outdegree | -22        | -0.0266323 | 0.0275296 | -0.0968164 | 0.0435518  |
| Most   | Hateful non-audience outdegree | -21        | -0.0231238 | 0.0274059 | -0.0929925 | 0.0467450  |
| Most   | Hateful non-audience outdegree | -20        | 0.0014607  | 0.0619135 | -0.1563819 | 0.1593034  |
| Most   | Hateful non-audience outdegree | -19        | 0.0485011  | 0.0604851 | -0.1057001 | 0.2027024  |
| Most   | Hateful non-audience outdegree | -18        | -0.0039674 | 0.0536063 | -0.1406317 | 0.1326968  |
| Most   | Hateful non-audience outdegree | -17        | 0.1468570  | 0.0586914 | -0.0027713 | 0.2964853  |
| Most   | Hateful non-audience outdegree | -16        | 0.0269011  | 0.0500480 | -0.1006918 | 0.1544939  |
| Most   | Hateful non-audience outdegree | -15        | -0.0648394 | 0.0509488 | -0.1947285 | 0.0650498  |
| Most   | Hateful non-audience outdegree | -14        | 0.0374254  | 0.0434017 | -0.0732234 | 0.1480741  |
| Most   | Hateful non-audience outdegree | -13        | -0.1662488 | 0.0654896 | -0.3332085 | 0.0007108  |
| Most   | Hateful non-audience outdegree | -12        | 0.0791672  | 0.0579009 | -0.0684459 | 0.2267803  |
| Most   | Hateful non-audience outdegree | -11        | 0.0118216  | 0.0144247 | -0.0249528 | 0.0485960  |
| Most   | Hateful non-audience outdegree | -10        | 0.0372168  | 0.0354964 | -0.0532780 | 0.1277115  |
| Most   | Hateful non-audience outdegree | -9         | -0.0017540 | 0.0170133 | -0.0451278 | 0.0416197  |
| Most   | Hateful non-audience outdegree | -8         | -0.0295971 | 0.0274832 | -0.0996631 | 0.0404689  |
| Most   | Hateful non-audience outdegree | -7         | -0.0221689 | 0.0274332 | -0.0921072 | 0.0477694  |
| Most   | Hateful non-audience outdegree | -6         | -0.0285526 | 0.0262808 | -0.0955530 | 0.0384478  |
| Most   | Hateful non-audience outdegree | -5         | 0.0477936  | 0.0236507 | -0.0125017 | 0.1080888  |
| Most   | Hateful non-audience outdegree | -4         | -0.0264788 | 0.0396680 | -0.1276088 | 0.0746511  |
| Most   | Hateful non-audience outdegree | -3         | -0.0511938 | 0.0291511 | -0.1255119 | 0.0231243  |
| Most   | Hateful non-audience outdegree | -2         | 0.0265405  | 0.0252561 | -0.0378477 | 0.0909287  |
| Most   | Hateful non-audience outdegree | -1         | 0.0241340  | 0.0810860 | -0.1825872 | 0.2308553  |
| Most   | Hateful non-audience outdegree | 0          | -0.1836069 | 0.1382050 | -0.5359477 | 0.1687339  |
| Most   | Hateful non-audience outdegree | 1          | 0.0548523  | 0.0668910 | -0.1156802 | 0.2253848  |
| Most   | Hateful non-audience outdegree | 2          | 0.0276342  | 0.0393993 | -0.0728108 | 0.1280792  |
| Most   | Hateful non-audience outdegree | 3          | 0.0786916  | 0.0448164 | -0.0355638 | 0.1929469  |
| Most   | Hateful non-audience outdegree | 4          | 0.0283842  | 0.0475593 | -0.0928639 | 0.1496323  |
| Most   | Hateful non-audience outdegree | 5          | 0.0236355  | 0.0756736 | -0.1692874 | 0.2165584  |
| Most   | Hateful non-audience outdegree | 6          | 0.0787735  | 0.0701176 | -0.0999848 | 0.2575319  |
| Most   | Hateful non-audience outdegree | 7          | 0.0453940  | 0.0756881 | -0.1475659 | 0.2383539  |

|      |                                |    |            |           |            |           |
|------|--------------------------------|----|------------|-----------|------------|-----------|
| Most | Hateful non-audience outdegree | 8  | 0.0581986  | 0.0815635 | -0.1497399 | 0.2661372 |
| Most | Hateful non-audience outdegree | 9  | 0.0987840  | 0.0820197 | -0.1103178 | 0.3078858 |
| Most | Hateful non-audience outdegree | 10 | 0.0502558  | 0.0923778 | -0.1852528 | 0.2857645 |
| Most | Hateful non-audience outdegree | 11 | 0.0523576  | 0.0940373 | -0.1873818 | 0.2920970 |
| Most | Hateful non-audience outdegree | 12 | 0.0609096  | 0.0793150 | -0.1412966 | 0.2631159 |
| Most | Hateful non-audience outdegree | 13 | 0.0330793  | 0.0725253 | -0.1518173 | 0.2179759 |
| Most | Hateful non-audience outdegree | 14 | 0.0459140  | 0.1929996 | -0.4461208 | 0.5379489 |
| Most | Hateful non-audience outdegree | 15 | 0.1090560  | 0.1922400 | -0.3810422 | 0.5991542 |
| Most | Hateful non-audience outdegree | 16 | 0.0944968  | 0.2115831 | -0.4449148 | 0.6339084 |
| Most | Hateful non-audience outdegree | 17 | 0.0372803  | 0.1905665 | -0.4485515 | 0.5231121 |
| Most | Hateful non-audience outdegree | 18 | 0.0697638  | 0.2422716 | -0.5478853 | 0.6874129 |
| Most | Hateful non-audience outdegree | 19 | 0.0958487  | 0.2318347 | -0.4951925 | 0.6868900 |
| Most | Hateful non-audience outdegree | 20 | 0.0807864  | 0.2110821 | -0.4573481 | 0.6189208 |
| Most | Hateful non-audience outdegree | 21 | 0.0490860  | 0.1960786 | -0.4507983 | 0.5489704 |
| Most | Hateful non-audience outdegree | 22 | 0.0451282  | 0.2429886 | -0.5743488 | 0.6646052 |
| Most | Hateful non-audience outdegree | 23 | 0.0696945  | 0.2210476 | -0.4938461 | 0.6332351 |
| Most | Hateful non-audience outdegree | 24 | 0.1003893  | 0.2072604 | -0.4280021 | 0.6287807 |
| Most | Hateful non-audience outdegree | 25 | 0.0157948  | 0.2038728 | -0.5039600 | 0.5355497 |
| Most | Hateful non-audience outdegree | 26 | 0.0225282  | 0.1751158 | -0.4239133 | 0.4689697 |
| Most | Hateful non-audience outdegree | 27 | -0.0223582 | 0.2143457 | -0.5688128 | 0.5240965 |
| Most | Hateful non-audience outdegree | 28 | -0.0554266 | 0.2626039 | -0.7249110 | 0.6140578 |
| Most | Hateful non-audience outdegree | 29 | -0.1384958 | 0.2109348 | -0.6762548 | 0.3992632 |
| Most | Hateful non-audience outdegree | 30 | -0.1356830 | 0.1750237 | -0.5818899 | 0.3105238 |

| sample | outcome                        | event.time | estimate   | std.error | conf.low   | conf.high |
|--------|--------------------------------|------------|------------|-----------|------------|-----------|
| Middle | Hateful non-audience outdegree | -30        | 0.0435851  | 0.0275389 | -0.0272843 | 0.1144544 |
| Middle | Hateful non-audience outdegree | -29        | -0.0211027 | 0.0233046 | -0.0810755 | 0.0388702 |
| Middle | Hateful non-audience outdegree | -28        | -0.0134207 | 0.0191566 | -0.0627189 | 0.0358774 |
| Middle | Hateful non-audience outdegree | -27        | 0.0114213  | 0.0159956 | -0.0297421 | 0.0525847 |
| Middle | Hateful non-audience outdegree | -26        | 0.0905946  | 0.0472753 | -0.0310650 | 0.2122543 |
| Middle | Hateful non-audience outdegree | -25        | -0.0796310 | 0.0410396 | -0.1852434 | 0.0259815 |
| Middle | Hateful non-audience outdegree | -24        | -0.0404534 | 0.0244914 | -0.1034803 | 0.0225734 |
| Middle | Hateful non-audience outdegree | -23        | -0.0254999 | 0.0148976 | -0.0638378 | 0.0128380 |
| Middle | Hateful non-audience outdegree | -22        | -0.0061178 | 0.0139292 | -0.0419637 | 0.0297281 |
| Middle | Hateful non-audience outdegree | -21        | -0.0036552 | 0.0224686 | -0.0614765 | 0.0541662 |
| Middle | Hateful non-audience outdegree | -20        | 0.0298077  | 0.0326883 | -0.0543133 | 0.1139287 |
| Middle | Hateful non-audience outdegree | -19        | 0.0619638  | 0.0735165 | -0.1272258 | 0.2511534 |
| Middle | Hateful non-audience outdegree | -18        | 0.0078624  | 0.0287291 | -0.0660699 | 0.0817946 |
| Middle | Hateful non-audience outdegree | -17        | 0.0792870  | 0.0269444 | 0.0099475  | 0.1486265 |
| Middle | Hateful non-audience outdegree | -16        | 0.0079871  | 0.0405906 | -0.0964700 | 0.1124442 |
| Middle | Hateful non-audience outdegree | -15        | -0.0127780 | 0.0181855 | -0.0595772 | 0.0340211 |

|        |                                |     |            |           |            |            |
|--------|--------------------------------|-----|------------|-----------|------------|------------|
| Middle | Hateful non-audience outdegree | -14 | 0.0370671  | 0.0335613 | -0.0493004 | 0.1234347  |
| Middle | Hateful non-audience outdegree | -13 | -0.1494311 | 0.0653340 | -0.3175634 | 0.0187012  |
| Middle | Hateful non-audience outdegree | -12 | 0.1011186  | 0.0447088 | -0.0139365 | 0.2161737  |
| Middle | Hateful non-audience outdegree | -11 | 0.0298975  | 0.0238139 | -0.0313860 | 0.0911810  |
| Middle | Hateful non-audience outdegree | -10 | 0.0015962  | 0.0405225 | -0.1026856 | 0.1058780  |
| Middle | Hateful non-audience outdegree | -9  | -0.0127230 | 0.0318384 | -0.0946569 | 0.0692110  |
| Middle | Hateful non-audience outdegree | -8  | 0.0174206  | 0.0292667 | -0.0578952 | 0.0927363  |
| Middle | Hateful non-audience outdegree | -7  | -0.0805622 | 0.0243554 | -0.1432392 | -0.0178852 |
| Middle | Hateful non-audience outdegree | -6  | -0.1121884 | 0.0524022 | -0.2470418 | 0.0226651  |
| Middle | Hateful non-audience outdegree | -5  | 0.0226678  | 0.0294769 | -0.0531889 | 0.0985245  |
| Middle | Hateful non-audience outdegree | -4  | -0.0276745 | 0.0216024 | -0.0832668 | 0.0279179  |
| Middle | Hateful non-audience outdegree | -3  | -0.1187258 | 0.0431647 | -0.2298070 | -0.0076446 |
| Middle | Hateful non-audience outdegree | -2  | 0.0650255  | 0.0272190 | -0.0050208 | 0.1350718  |
| Middle | Hateful non-audience outdegree | -1  | -0.0090682 | 0.0373915 | -0.1052925 | 0.0871562  |
| Middle | Hateful non-audience outdegree | 0   | -0.1325504 | 0.0743650 | -0.3239235 | 0.0588226  |
| Middle | Hateful non-audience outdegree | 1   | 0.1029768  | 0.0286600 | 0.0292222  | 0.1767314  |
| Middle | Hateful non-audience outdegree | 2   | 0.0969492  | 0.0496892 | -0.0309224 | 0.2248209  |
| Middle | Hateful non-audience outdegree | 3   | 0.1283399  | 0.0572809 | -0.0190684 | 0.2757482  |
| Middle | Hateful non-audience outdegree | 4   | 0.1718435  | 0.0890987 | -0.0574458 | 0.4011328  |
| Middle | Hateful non-audience outdegree | 5   | 0.1290005  | 0.1083512 | -0.1498338 | 0.4078348  |
| Middle | Hateful non-audience outdegree | 6   | 0.1328352  | 0.0985702 | -0.1208283 | 0.3864988  |
| Middle | Hateful non-audience outdegree | 7   | 0.1871163  | 0.0995055 | -0.0689542 | 0.4431868  |
| Middle | Hateful non-audience outdegree | 8   | 0.1398365  | 0.0879357 | -0.0864599 | 0.3661328  |
| Middle | Hateful non-audience outdegree | 9   | 0.1538865  | 0.0960491 | -0.0932892 | 0.4010621  |
| Middle | Hateful non-audience outdegree | 10  | 0.1716626  | 0.1012623 | -0.0889288 | 0.4322541  |
| Middle | Hateful non-audience outdegree | 11  | 0.1989973  | 0.1340128 | -0.1458752 | 0.5438698  |
| Middle | Hateful non-audience outdegree | 12  | 0.1895986  | 0.1327992 | -0.1521507 | 0.5313478  |
| Middle | Hateful non-audience outdegree | 13  | 0.1211740  | 0.1141142 | -0.1724909 | 0.4148388  |
| Middle | Hateful non-audience outdegree | 14  | 0.1223100  | 0.2001932 | -0.3928732 | 0.6374932  |
| Middle | Hateful non-audience outdegree | 15  | 0.1505638  | 0.2279905 | -0.4361537 | 0.7372814  |
| Middle | Hateful non-audience outdegree | 16  | 0.1588939  | 0.2244209 | -0.4186375 | 0.7364253  |
| Middle | Hateful non-audience outdegree | 17  | 0.2032567  | 0.2933240 | -0.5515920 | 0.9581054  |
| Middle | Hateful non-audience outdegree | 18  | 0.2183315  | 0.3184535 | -0.6011861 | 1.0378492  |
| Middle | Hateful non-audience outdegree | 19  | 0.2092033  | 0.2880973 | -0.5321947 | 0.9506013  |
| Middle | Hateful non-audience outdegree | 20  | 0.1513358  | 0.2422022 | -0.4719545 | 0.7746261  |
| Middle | Hateful non-audience outdegree | 21  | 0.1533133  | 0.2875918 | -0.5867838 | 0.8934104  |
| Middle | Hateful non-audience outdegree | 22  | 0.1497627  | 0.2634919 | -0.5283151 | 0.8278406  |
| Middle | Hateful non-audience outdegree | 23  | 0.1530752  | 0.2417142 | -0.4689592 | 0.7751095  |
| Middle | Hateful non-audience outdegree | 24  | 0.1880261  | 0.3003092 | -0.5847984 | 0.9608506  |
| Middle | Hateful non-audience outdegree | 25  | 0.1909198  | 0.3043140 | -0.5922107 | 0.9740504  |
| Middle | Hateful non-audience outdegree | 26  | 0.0763482  | 0.2286378 | -0.5120349 | 0.6647313  |

|        |                                |    |            |           |            |           |
|--------|--------------------------------|----|------------|-----------|------------|-----------|
| Middle | Hateful non-audience outdegree | 27 | -0.1264863 | 0.2448145 | -0.7564991 | 0.5035265 |
| Middle | Hateful non-audience outdegree | 28 | 0.0818153  | 0.2743892 | -0.6243060 | 0.7879366 |
| Middle | Hateful non-audience outdegree | 29 | 0.0437565  | 0.2762287 | -0.6670986 | 0.7546116 |
| Middle | Hateful non-audience outdegree | 30 | -0.0890619 | 0.2667809 | -0.7756036 | 0.5974797 |

| sample | outcome                        | event.time | estimate   | std.error | conf.low   | conf.high  |
|--------|--------------------------------|------------|------------|-----------|------------|------------|
| Least  | Hateful non-audience outdegree | -30        | -0.0280016 | 0.0340577 | -0.1116411 | 0.0556379  |
| Least  | Hateful non-audience outdegree | -29        | 0.0662328  | 0.0261231 | 0.0020792  | 0.1303863  |
| Least  | Hateful non-audience outdegree | -28        | -0.0409510 | 0.0291405 | -0.1125148 | 0.0306128  |
| Least  | Hateful non-audience outdegree | -27        | 0.1399406  | 0.0548563 | 0.0052233  | 0.2746579  |
| Least  | Hateful non-audience outdegree | -26        | 0.1239860  | 0.0887331 | -0.0939267 | 0.3418987  |
| Least  | Hateful non-audience outdegree | -25        | -0.1476774 | 0.0770175 | -0.3368185 | 0.0414638  |
| Least  | Hateful non-audience outdegree | -24        | -0.0800149 | 0.1380689 | -0.4190873 | 0.2590575  |
| Least  | Hateful non-audience outdegree | -23        | -0.0396056 | 0.0238875 | -0.0982690 | 0.0190578  |
| Least  | Hateful non-audience outdegree | -22        | 0.1485023  | 0.0600078 | 0.0011339  | 0.2958707  |
| Least  | Hateful non-audience outdegree | -21        | -0.0171808 | 0.0380760 | -0.1106887 | 0.0763270  |
| Least  | Hateful non-audience outdegree | -20        | 0.1204149  | 0.0352777 | 0.0337793  | 0.2070505  |
| Least  | Hateful non-audience outdegree | -19        | 0.2188032  | 0.0851386 | 0.0097180  | 0.4278884  |
| Least  | Hateful non-audience outdegree | -18        | -0.0066194 | 0.0658740 | -0.1683940 | 0.1551553  |
| Least  | Hateful non-audience outdegree | -17        | 0.0960429  | 0.0344964 | 0.0113259  | 0.1807598  |
| Least  | Hateful non-audience outdegree | -16        | 0.0297424  | 0.0504533 | -0.0941618 | 0.1536466  |
| Least  | Hateful non-audience outdegree | -15        | 0.0712291  | 0.0489612 | -0.0490109 | 0.1914691  |
| Least  | Hateful non-audience outdegree | -14        | -0.0934226 | 0.0214082 | -0.1459973 | -0.0408478 |
| Least  | Hateful non-audience outdegree | -13        | -0.2712302 | 0.1018682 | -0.5214003 | -0.0210602 |
| Least  | Hateful non-audience outdegree | -12        | 0.1331470  | 0.1171596 | -0.1545761 | 0.4208701  |
| Least  | Hateful non-audience outdegree | -11        | 0.0297992  | 0.0373222 | -0.0618574 | 0.1214558  |
| Least  | Hateful non-audience outdegree | -10        | -0.0726277 | 0.0521344 | -0.2006605 | 0.0554051  |
| Least  | Hateful non-audience outdegree | -9         | -0.0197536 | 0.0748952 | -0.2036829 | 0.1641757  |
| Least  | Hateful non-audience outdegree | -8         | 0.0014680  | 0.0505757 | -0.1227369 | 0.1256728  |
| Least  | Hateful non-audience outdegree | -7         | -0.1292740 | 0.0507247 | -0.2538447 | -0.0047033 |
| Least  | Hateful non-audience outdegree | -6         | -0.0434021 | 0.0679483 | -0.2102710 | 0.1234668  |
| Least  | Hateful non-audience outdegree | -5         | -0.0555735 | 0.0562444 | -0.1936995 | 0.0825526  |
| Least  | Hateful non-audience outdegree | -4         | 0.0146028  | 0.0424050 | -0.0895364 | 0.1187419  |
| Least  | Hateful non-audience outdegree | -3         | -0.1496072 | 0.0725690 | -0.3278237 | 0.0286093  |
| Least  | Hateful non-audience outdegree | -2         | 0.0204713  | 0.0597111 | -0.1261684 | 0.1671109  |
| Least  | Hateful non-audience outdegree | -1         | 0.0315535  | 0.0726052 | -0.1467518 | 0.2098589  |
| Least  | Hateful non-audience outdegree | 0          | -0.3839855 | 0.1340982 | -0.7133067 | -0.0546642 |
| Least  | Hateful non-audience outdegree | 1          | 0.0810002  | 0.0416994 | -0.0214060 | 0.1834063  |
| Least  | Hateful non-audience outdegree | 2          | 0.0767688  | 0.0538576 | -0.0554957 | 0.2090333  |
| Least  | Hateful non-audience outdegree | 3          | 0.1487303  | 0.1009666 | -0.0992257 | 0.3966863  |
| Least  | Hateful non-audience outdegree | 4          | 0.0815758  | 0.1061637 | -0.1791433 | 0.3422949  |

|       |                                |    |            |           |            |           |
|-------|--------------------------------|----|------------|-----------|------------|-----------|
| Least | Hateful non-audience outdegree | 5  | 0.1209467  | 0.1522734 | -0.2530096 | 0.4949029 |
| Least | Hateful non-audience outdegree | 6  | 0.1202738  | 0.1230938 | -0.1820225 | 0.4225700 |
| Least | Hateful non-audience outdegree | 7  | 0.1223047  | 0.1286643 | -0.1936717 | 0.4382812 |
| Least | Hateful non-audience outdegree | 8  | 0.1368535  | 0.1285433 | -0.1788258 | 0.4525328 |
| Least | Hateful non-audience outdegree | 9  | 0.1296817  | 0.2160961 | -0.4010115 | 0.6603749 |
| Least | Hateful non-audience outdegree | 10 | 0.1063036  | 0.1969184 | -0.3772928 | 0.5899000 |
| Least | Hateful non-audience outdegree | 11 | 0.1592157  | 0.1797123 | -0.2821256 | 0.6005569 |
| Least | Hateful non-audience outdegree | 12 | 0.1619607  | 0.2303757 | -0.4038008 | 0.7277222 |
| Least | Hateful non-audience outdegree | 13 | 0.0334877  | 0.1404977 | -0.3115494 | 0.3785248 |
| Least | Hateful non-audience outdegree | 14 | 0.0450346  | 0.2917349 | -0.6714140 | 0.7614832 |
| Least | Hateful non-audience outdegree | 15 | 0.1132660  | 0.2932854 | -0.6069904 | 0.8335223 |
| Least | Hateful non-audience outdegree | 16 | 0.0991955  | 0.3516981 | -0.7645121 | 0.9629031 |
| Least | Hateful non-audience outdegree | 17 | 0.0676339  | 0.3661225 | -0.8314973 | 0.9667651 |
| Least | Hateful non-audience outdegree | 18 | 0.1387205  | 0.4038282 | -0.8530092 | 1.1304503 |
| Least | Hateful non-audience outdegree | 19 | 0.0193937  | 0.2913172 | -0.6960291 | 0.7348166 |
| Least | Hateful non-audience outdegree | 20 | 0.0474828  | 0.3198350 | -0.7379746 | 0.8329402 |
| Least | Hateful non-audience outdegree | 21 | 0.0863590  | 0.3892331 | -0.8695277 | 1.0422457 |
| Least | Hateful non-audience outdegree | 22 | 0.0042133  | 0.3715071 | -0.9081415 | 0.9165681 |
| Least | Hateful non-audience outdegree | 23 | 0.0874593  | 0.3485293 | -0.7684663 | 0.9433849 |
| Least | Hateful non-audience outdegree | 24 | 0.1375935  | 0.3817269 | -0.7998594 | 1.0750463 |
| Least | Hateful non-audience outdegree | 25 | 0.1157231  | 0.4203633 | -0.9166137 | 1.1480600 |
| Least | Hateful non-audience outdegree | 26 | 0.0747069  | 0.4047695 | -0.9193346 | 1.0687483 |
| Least | Hateful non-audience outdegree | 27 | -0.4091374 | 1.0963064 | -3.1014694 | 2.2831946 |
| Least | Hateful non-audience outdegree | 28 | -0.3221113 | 1.3486315 | -3.6341086 | 2.9898860 |
| Least | Hateful non-audience outdegree | 29 | -0.2601925 | 1.1699331 | -3.1333387 | 2.6129537 |
| Least | Hateful non-audience outdegree | 30 | -0.2247002 | 1.9367368 | -4.9809788 | 4.5315784 |

**Robustness: Dynamic differences-in-differences (Callaway and Sant'Anna 2021) for long time frame with sampled control groups**

**Views on hateful content**

Average effect by length of exposure (Callaway and Sant'Anna)

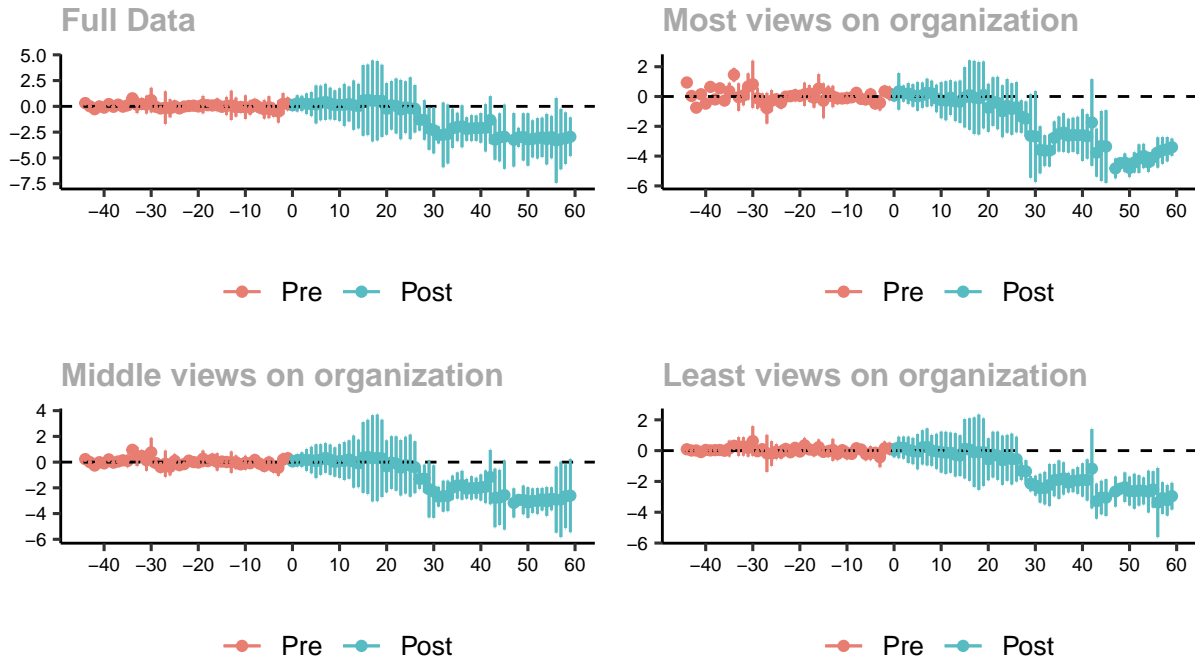

Long timeframe with sampled control groups

| sample | outcome                  | event.time | estimate   | std.error | conf.low   | conf.high  |
|--------|--------------------------|------------|------------|-----------|------------|------------|
| Full   | Views on hateful content | -44        | 0.3156433  | 0.0896840 | 0.0793014  | 0.5519852  |
| Full   | Views on hateful content | -43        | 0.0098167  | 0.0428141 | -0.1030100 | 0.1226434  |
| Full   | Views on hateful content | -42        | -0.2722284 | 0.0496683 | -0.4031181 | -0.1413388 |
| Full   | Views on hateful content | -41        | -0.0015550 | 0.0580121 | -0.1544325 | 0.1513226  |
| Full   | Views on hateful content | -40        | -0.1222139 | 0.0808314 | -0.3352265 | 0.0907987  |
| Full   | Views on hateful content | -39        | 0.2243700  | 0.0874472 | -0.0060772 | 0.4548172  |
| Full   | Views on hateful content | -38        | -0.0406787 | 0.0676672 | -0.2190003 | 0.1376429  |
| Full   | Views on hateful content | -37        | 0.1660275  | 0.0362568 | 0.0704809  | 0.2615742  |
| Full   | Views on hateful content | -36        | -0.0284254 | 0.0750141 | -0.2261081 | 0.1692572  |
| Full   | Views on hateful content | -35        | 0.1033568  | 0.1980841 | -0.4186487 | 0.6253624  |
| Full   | Views on hateful content | -34        | 0.7833448  | 0.1263958 | 0.4502575  | 1.1164322  |
| Full   | Views on hateful content | -33        | 0.1470407  | 0.3026320 | -0.6504770 | 0.9445584  |
| Full   | Views on hateful content | -32        | 0.2460091  | 0.2026576 | -0.2880489 | 0.7800671  |
| Full   | Views on hateful content | -31        | 0.1699635  | 0.3262618 | -0.6898253 | 1.0297522  |
| Full   | Views on hateful content | -30        | 0.6064396  | 0.4521275 | -0.5850396 | 1.7979189  |

|      |                          |     |            |           |            |           |
|------|--------------------------|-----|------------|-----------|------------|-----------|
| Full | Views on hateful content | -29 | -0.0453440 | 0.1387699 | -0.4110405 | 0.3203526 |
| Full | Views on hateful content | -28 | -0.2037504 | 0.1115552 | -0.4977287 | 0.0902280 |
| Full | Views on hateful content | -27 | -0.1256826 | 0.5964614 | -1.6975210 | 1.4461557 |
| Full | Views on hateful content | -26 | -0.1843393 | 0.3316563 | -1.0583440 | 0.6896655 |
| Full | Views on hateful content | -25 | 0.0148706  | 0.2214793 | -0.5687878 | 0.5985290 |
| Full | Views on hateful content | -24 | -0.1942747 | 0.1639694 | -0.6263788 | 0.2378294 |
| Full | Views on hateful content | -23 | -0.0192825 | 0.0956843 | -0.2714367 | 0.2328717 |
| Full | Views on hateful content | -22 | 0.0337911  | 0.0665426 | -0.1415669 | 0.2091491 |
| Full | Views on hateful content | -21 | 0.0663085  | 0.0906191 | -0.1724975 | 0.3051146 |
| Full | Views on hateful content | -20 | -0.0075830 | 0.0823797 | -0.2246760 | 0.2095100 |
| Full | Views on hateful content | -19 | 0.1701168  | 0.3190595 | -0.6706919 | 1.0109256 |
| Full | Views on hateful content | -18 | 0.1123242  | 0.0680309 | -0.0669558 | 0.2916041 |
| Full | Views on hateful content | -17 | 0.0830975  | 0.1507207 | -0.3140927 | 0.4802877 |
| Full | Views on hateful content | -16 | 0.1511782  | 0.2357415 | -0.4700648 | 0.7724213 |
| Full | Views on hateful content | -15 | -0.0390828 | 0.1551686 | -0.4479944 | 0.3698288 |
| Full | Views on hateful content | -14 | 0.0352045  | 0.3341775 | -0.8454442 | 0.9158531 |
| Full | Views on hateful content | -13 | 0.1030491  | 0.5373676 | -1.3130609 | 1.5191591 |
| Full | Views on hateful content | -12 | -0.0722805 | 0.3474257 | -0.9878418 | 0.8432807 |
| Full | Views on hateful content | -11 | -0.0649783 | 0.1922002 | -0.5714782 | 0.4415217 |
| Full | Views on hateful content | -10 | -0.0800036 | 0.4312828 | -1.2165513 | 1.0565441 |
| Full | Views on hateful content | -9  | -0.1261442 | 0.2662209 | -0.8277088 | 0.5754204 |
| Full | Views on hateful content | -8  | 0.1672190  | 0.2113572 | -0.3897650 | 0.7242029 |
| Full | Views on hateful content | -7  | -0.1053956 | 0.2079351 | -0.6533612 | 0.4425700 |
| Full | Views on hateful content | -6  | -0.2792895 | 0.3428432 | -1.1827747 | 0.6241957 |
| Full | Views on hateful content | -5  | -0.0799297 | 0.4026130 | -1.1409248 | 0.9810654 |
| Full | Views on hateful content | -4  | -0.3428322 | 0.2609958 | -1.0306274 | 0.3449629 |
| Full | Views on hateful content | -3  | -0.5043008 | 0.4041097 | -1.5692400 | 0.5606384 |
| Full | Views on hateful content | -2  | 0.2446016  | 0.3931174 | -0.7913697 | 1.2805730 |
| Full | Views on hateful content | -1  | 0.2441213  | 0.2417247 | -0.3928891 | 0.8811318 |
| Full | Views on hateful content | 0   | 0.1096822  | 0.2046712 | -0.4296823 | 0.6490467 |
| Full | Views on hateful content | 1   | 0.2851654  | 0.2981566 | -0.5005585 | 1.0708893 |
| Full | Views on hateful content | 2   | 0.2841049  | 0.2819190 | -0.4588284 | 1.0270382 |
| Full | Views on hateful content | 3   | 0.2516541  | 0.3782031 | -0.7450142 | 1.2483224 |
| Full | Views on hateful content | 4   | 0.2175571  | 0.4411927 | -0.9451060 | 1.3802202 |
| Full | Views on hateful content | 5   | 0.1848732  | 0.6960058 | -1.6492919 | 2.0190382 |
| Full | Views on hateful content | 6   | 0.3277355  | 0.6350641 | -1.3458314 | 2.0013024 |
| Full | Views on hateful content | 7   | 0.4307426  | 0.6645116 | -1.3204265 | 2.1819118 |
| Full | Views on hateful content | 8   | 0.2752623  | 0.5813478 | -1.2567476 | 1.8072722 |
| Full | Views on hateful content | 9   | 0.1148196  | 0.5435269 | -1.3175219 | 1.5471611 |
| Full | Views on hateful content | 10  | 0.1563428  | 0.6008443 | -1.4270457 | 1.7397313 |
| Full | Views on hateful content | 11  | 0.1373902  | 0.7742561 | -1.9029857 | 2.1777661 |



|      |                          |    |            |           |            |            |
|------|--------------------------|----|------------|-----------|------------|------------|
| Full | Views on hateful content | 12 | 0.2343488  | 0.6406048 | -1.4538193 | 1.9225170  |
| Full | Views on hateful content | 13 | 0.1161630  | 0.9055389 | -2.2701789 | 2.5025049  |
| Full | Views on hateful content | 14 | 0.0251924  | 0.8174872 | -2.1291091 | 2.1794940  |
| Full | Views on hateful content | 15 | 0.5775605  | 1.3003897 | -2.8493208 | 4.0044418  |
| Full | Views on hateful content | 16 | 0.6356107  | 1.2980115 | -2.7850034 | 4.0562248  |
| Full | Views on hateful content | 17 | 0.5306960  | 1.4890748 | -3.3934220 | 4.4548140  |
| Full | Views on hateful content | 18 | 0.5451105  | 1.4578706 | -3.2967759 | 4.3869969  |
| Full | Views on hateful content | 19 | 0.5359974  | 1.3270228 | -2.9610694 | 4.0330641  |
| Full | Views on hateful content | 20 | -0.2360786 | 0.9497051 | -2.7388105 | 2.2666533  |
| Full | Views on hateful content | 21 | 0.1061530  | 0.8921260 | -2.2448421 | 2.4571481  |
| Full | Views on hateful content | 22 | 0.0372203  | 1.0093437 | -2.6226754 | 2.6971160  |
| Full | Views on hateful content | 23 | -0.3095275 | 1.0896934 | -3.1811667 | 2.5621117  |
| Full | Views on hateful content | 24 | -0.0845696 | 0.9518067 | -2.5928397 | 2.4237006  |
| Full | Views on hateful content | 25 | -0.1852299 | 1.1363262 | -3.1797591 | 2.8092992  |
| Full | Views on hateful content | 26 | -0.2305488 | 0.8715341 | -2.5272787 | 2.0661810  |
| Full | Views on hateful content | 27 | -1.2906243 | 0.3984067 | -2.3405344 | -0.2407141 |
| Full | Views on hateful content | 28 | -1.3227860 | 0.7256583 | -3.2350933 | 0.5895213  |
| Full | Views on hateful content | 29 | -2.1594439 | 0.7787158 | -4.2115722 | -0.1073156 |
| Full | Views on hateful content | 30 | -2.3154557 | 0.8498791 | -4.5551186 | -0.0757928 |
| Full | Views on hateful content | 31 | -2.7748390 | 0.3095152 | -3.5904959 | -1.9591821 |
| Full | Views on hateful content | 32 | -2.7681846 | 1.1892466 | -5.9021735 | 0.3658043  |
| Full | Views on hateful content | 33 | -2.6818647 | 1.0815206 | -5.5319661 | 0.1682367  |
| Full | Views on hateful content | 34 | -2.1289127 | 0.7187588 | -4.0230380 | -0.2347875 |
| Full | Views on hateful content | 35 | -1.9959694 | 0.5215185 | -3.3703127 | -0.6216260 |
| Full | Views on hateful content | 36 | -1.9356938 | 0.7694879 | -3.9635040 | 0.0921165  |
| Full | Views on hateful content | 37 | -2.1968792 | 0.4302405 | -3.3306802 | -1.0630782 |
| Full | Views on hateful content | 38 | -2.1109639 | 0.4771362 | -3.3683477 | -0.8535801 |
| Full | Views on hateful content | 39 | -2.1223115 | 0.4677403 | -3.3549347 | -0.8896882 |
| Full | Views on hateful content | 40 | -2.0834797 | 0.5450001 | -3.5197035 | -0.6472559 |
| Full | Views on hateful content | 41 | -2.0803262 | 0.8667380 | -4.3644170 | 0.2037646  |
| Full | Views on hateful content | 42 | -1.3187876 | 0.8705918 | -3.6130341 | 0.9754589  |
| Full | Views on hateful content | 43 | -3.2284992 | 0.7351854 | -5.1659130 | -1.2910855 |
| Full | Views on hateful content | 44 | -3.0072223 | 0.8812027 | -5.3294317 | -0.6850129 |
| Full | Views on hateful content | 45 | -2.9464396 | 1.1783395 | -6.0516853 | 0.1588060  |
| Full | Views on hateful content | 47 | -3.2436477 | 0.9807965 | -5.8283137 | -0.6589816 |
| Full | Views on hateful content | 48 | -3.0117672 | 0.3514167 | -3.9378460 | -2.0856885 |
| Full | Views on hateful content | 49 | -2.9666189 | 0.8660325 | -5.2488505 | -0.6843873 |
| Full | Views on hateful content | 50 | -3.2132847 | 0.9635389 | -5.7524721 | -0.6740972 |
| Full | Views on hateful content | 51 | -3.1533865 | 0.6790064 | -4.9427534 | -1.3640196 |
| Full | Views on hateful content | 52 | -3.0945418 | 0.7415655 | -5.0487691 | -1.1403146 |
| Full | Views on hateful content | 53 | -3.0069565 | 0.7241553 | -4.9153030 | -1.0986099 |

|      |                          |    |            |           |            |            |
|------|--------------------------|----|------------|-----------|------------|------------|
| Full | Views on hateful content | 54 | -3.1801691 | 0.9276341 | -5.6247378 | -0.7356004 |
| Full | Views on hateful content | 55 | -2.9751485 | 0.7789214 | -5.0278186 | -0.9224784 |
| Full | Views on hateful content | 56 | -3.3046670 | 1.5617246 | -7.4202369 | 0.8109029  |
| Full | Views on hateful content | 57 | -3.1749514 | 1.1091288 | -6.0978080 | -0.2520948 |
| Full | Views on hateful content | 58 | -3.0869328 | 0.9446566 | -5.5763603 | -0.5975053 |
| Full | Views on hateful content | 59 | -2.9530223 | 0.7089435 | -4.8212815 | -1.0847630 |

| sample | outcome                  | event.time | estimate   | std.error | conf.low   | conf.high  |
|--------|--------------------------|------------|------------|-----------|------------|------------|
| Most   | Views on hateful content | -44        | 0.9393102  | 0.1015181 | 0.6733859  | 1.2052346  |
| Most   | Views on hateful content | -43        | 0.0350929  | 0.0495727 | -0.0947617 | 0.1649475  |
| Most   | Views on hateful content | -42        | -0.7489948 | 0.0821332 | -0.9641409 | -0.5338486 |
| Most   | Views on hateful content | -41        | 0.1518887  | 0.0794382 | -0.0561978 | 0.3599752  |
| Most   | Views on hateful content | -40        | -0.4772743 | 0.0684625 | -0.6566103 | -0.2979382 |
| Most   | Views on hateful content | -39        | 0.6432520  | 0.1097963 | 0.3556431  | 0.9308608  |
| Most   | Views on hateful content | -38        | -0.1956736 | 0.1016504 | -0.4619445 | 0.0705974  |
| Most   | Views on hateful content | -37        | 0.5496962  | 0.0478340 | 0.4243960  | 0.6749964  |
| Most   | Views on hateful content | -36        | -0.2744977 | 0.0857430 | -0.4990996 | -0.0498957 |
| Most   | Views on hateful content | -35        | 0.3581583  | 0.2145387 | -0.2038211 | 0.9201377  |
| Most   | Views on hateful content | -34        | 1.4588292  | 0.1716785 | 1.0091213  | 1.9085372  |
| Most   | Views on hateful content | -33        | -0.0432946 | 0.3522738 | -0.9660679 | 0.8794786  |
| Most   | Views on hateful content | -32        | 0.0619567  | 0.2481068 | -0.5879534 | 0.7118668  |
| Most   | Views on hateful content | -31        | 0.6686911  | 0.3361047 | -0.2117276 | 1.5491099  |
| Most   | Views on hateful content | -30        | 0.8195811  | 0.6027858 | -0.7594027 | 2.3985650  |
| Most   | Views on hateful content | -29        | -0.1182749 | 0.2679785 | -0.8202386 | 0.5836889  |
| Most   | Views on hateful content | -28        | -0.3810084 | 0.2261749 | -0.9734685 | 0.2114517  |
| Most   | Views on hateful content | -27        | -0.7864696 | 0.3930074 | -1.8159438 | 0.2430046  |
| Most   | Views on hateful content | -26        | -0.2828792 | 0.2728074 | -0.9974920 | 0.4317337  |
| Most   | Views on hateful content | -25        | -0.1809940 | 0.1267050 | -0.5128950 | 0.1509069  |
| Most   | Views on hateful content | -24        | -0.4163606 | 0.1578480 | -0.8298400 | -0.0028811 |
| Most   | Views on hateful content | -23        | -0.0091329 | 0.1005405 | -0.2724964 | 0.2542307  |
| Most   | Views on hateful content | -22        | 0.0203649  | 0.0886512 | -0.2118549 | 0.2525847  |
| Most   | Views on hateful content | -21        | 0.0843136  | 0.1534627 | -0.3176786 | 0.4863059  |
| Most   | Views on hateful content | -20        | 0.0387463  | 0.1288721 | -0.2988313 | 0.3763239  |
| Most   | Views on hateful content | -19        | 0.1475477  | 0.2969965 | -0.6304281 | 0.9255235  |
| Most   | Views on hateful content | -18        | 0.2004929  | 0.2149820 | -0.3626476 | 0.7636333  |
| Most   | Views on hateful content | -17        | -0.0851015 | 0.2526059 | -0.7467970 | 0.5765940  |
| Most   | Views on hateful content | -16        | 0.5315703  | 0.3699311 | -0.4374559 | 1.5005965  |
| Most   | Views on hateful content | -15        | -0.2869391 | 0.4451353 | -1.4529611 | 0.8790829  |
| Most   | Views on hateful content | -14        | 0.2265054  | 0.1872096 | -0.2638859 | 0.7168967  |
| Most   | Views on hateful content | -13        | 0.0025300  | 0.2740358 | -0.7153007 | 0.7203607  |
| Most   | Views on hateful content | -12        | -0.1255525 | 0.1456530 | -0.5070874 | 0.2559824  |

|      |                          |     |            |           |            |            |
|------|--------------------------|-----|------------|-----------|------------|------------|
| Most | Views on hateful content | -11 | -0.1344193 | 0.0858176 | -0.3592166 | 0.0903781  |
| Most | Views on hateful content | -10 | -0.1000943 | 0.1502297 | -0.4936177 | 0.2934292  |
| Most | Views on hateful content | -9  | -0.0533085 | 0.1093674 | -0.3397939 | 0.2331770  |
| Most | Views on hateful content | -8  | 0.2482779  | 0.1105762 | -0.0413739 | 0.5379298  |
| Most | Views on hateful content | -7  | -0.1584468 | 0.1181925 | -0.4680494 | 0.1511558  |
| Most | Views on hateful content | -6  | -0.1984426 | 0.1268792 | -0.5307998 | 0.1339145  |
| Most | Views on hateful content | -5  | 0.1467778  | 0.1424838 | -0.2264554 | 0.5200110  |
| Most | Views on hateful content | -4  | -0.4770792 | 0.1326300 | -0.8245005 | -0.1296580 |
| Most | Views on hateful content | -3  | -0.4270639 | 0.1954497 | -0.9390400 | 0.0849122  |
| Most | Views on hateful content | -2  | 0.3486728  | 0.1360721 | -0.0077651 | 0.7051106  |
| Most | Views on hateful content | -1  | 0.2077832  | 0.1752041 | -0.2511600 | 0.6667265  |
| Most | Views on hateful content | 0   | 0.0664171  | 0.1479930 | -0.3212472 | 0.4540815  |
| Most | Views on hateful content | 1   | 0.3457311  | 0.4680217 | -0.8802411 | 1.5717033  |
| Most | Views on hateful content | 2   | 0.1977803  | 0.2064839 | -0.3430996 | 0.7386601  |
| Most | Views on hateful content | 3   | 0.1965730  | 0.2668551 | -0.5024481 | 0.8955940  |
| Most | Views on hateful content | 4   | 0.0733454  | 0.2868514 | -0.6780553 | 0.8247461  |
| Most | Views on hateful content | 5   | 0.0137337  | 0.3670898 | -0.9478499 | 0.9753173  |
| Most | Views on hateful content | 6   | 0.0893636  | 0.3226401 | -0.7557848 | 0.9345120  |
| Most | Views on hateful content | 7   | 0.2562238  | 0.3565090 | -0.6776436 | 1.1900913  |
| Most | Views on hateful content | 8   | 0.2084901  | 0.3258356 | -0.6450290 | 1.0620091  |
| Most | Views on hateful content | 9   | -0.1306538 | 0.3515163 | -1.0514429 | 0.7901353  |
| Most | Views on hateful content | 10  | -0.2460658 | 0.4620107 | -1.4562925 | 0.9641609  |
| Most | Views on hateful content | 11  | -0.2854031 | 0.4991743 | -1.5929789 | 1.0221726  |
| Most | Views on hateful content | 12  | -0.0733669 | 0.4458060 | -1.2411458 | 1.0944119  |
| Most | Views on hateful content | 13  | -0.3284799 | 0.5046191 | -1.6503183 | 0.9933586  |
| Most | Views on hateful content | 14  | -0.3516812 | 0.5419247 | -1.7712409 | 1.0678785  |
| Most | Views on hateful content | 15  | -0.0497281 | 0.7726844 | -2.0737577 | 1.9743015  |
| Most | Views on hateful content | 16  | 0.0958211  | 0.8876079 | -2.2292479 | 2.4208901  |
| Most | Views on hateful content | 17  | -0.0638335 | 0.9372172 | -2.5188529 | 2.3911858  |
| Most | Views on hateful content | 18  | -0.1167245 | 0.9275595 | -2.5464458 | 2.3129969  |
| Most | Views on hateful content | 19  | 0.1045884  | 0.8549128 | -2.1348365 | 2.3440133  |
| Most | Views on hateful content | 20  | -0.7572477 | 0.6140260 | -2.3656750 | 0.8511797  |
| Most | Views on hateful content | 21  | -0.3463150 | 0.6229290 | -1.9780635 | 1.2854334  |
| Most | Views on hateful content | 22  | -0.4367937 | 0.6704712 | -2.1930779 | 1.3194905  |
| Most | Views on hateful content | 23  | -0.9908333 | 0.6628945 | -2.7272704 | 0.7456039  |
| Most | Views on hateful content | 24  | -0.6301505 | 0.6869761 | -2.4296691 | 1.1693680  |
| Most | Views on hateful content | 25  | -0.8373686 | 0.6581797 | -2.5614556 | 0.8867184  |
| Most | Views on hateful content | 26  | -0.7164043 | 0.6421171 | -2.3984157 | 0.9656071  |
| Most | Views on hateful content | 27  | -1.3421539 | 0.4166955 | -2.4336783 | -0.2506295 |
| Most | Views on hateful content | 28  | -1.4876971 | 0.4400454 | -2.6403861 | -0.3350082 |
| Most | Views on hateful content | 29  | -2.6434995 | 1.0700751 | -5.4465372 | 0.1595382  |

|      |                          |    |            |           |            |            |
|------|--------------------------|----|------------|-----------|------------|------------|
| Most | Views on hateful content | 30 | -2.6822537 | 1.1656064 | -5.7355336 | 0.3710262  |
| Most | Views on hateful content | 31 | -3.5773546 | 0.6016566 | -5.1533807 | -2.0013285 |
| Most | Views on hateful content | 32 | -3.6347937 | 0.3943610 | -4.6678136 | -2.6017738 |
| Most | Views on hateful content | 33 | -3.6243867 | 0.4093361 | -4.6966334 | -2.5521400 |
| Most | Views on hateful content | 34 | -2.7705891 | 0.4181059 | -3.8658080 | -1.6753701 |
| Most | Views on hateful content | 35 | -2.5164099 | 0.4477630 | -3.6893150 | -1.3435049 |
| Most | Views on hateful content | 36 | -2.4184639 | 0.4939829 | -3.7124409 | -1.1244869 |
| Most | Views on hateful content | 37 | -2.6296106 | 0.4336753 | -3.7656133 | -1.4936080 |
| Most | Views on hateful content | 38 | -2.5666191 | 0.4359625 | -3.7086131 | -1.4246250 |
| Most | Views on hateful content | 39 | -2.6039770 | 0.4743086 | -3.8464178 | -1.3615363 |
| Most | Views on hateful content | 40 | -2.5884324 | 0.6610843 | -4.3201278 | -0.8567369 |
| Most | Views on hateful content | 41 | -2.6735809 | 0.5711572 | -4.1697144 | -1.1774473 |
| Most | Views on hateful content | 42 | -1.7417606 | 1.1076846 | -4.6433156 | 1.1597943  |
| Most | Views on hateful content | 43 | -3.7676931 | 0.6125404 | -5.3722290 | -2.1631573 |
| Most | Views on hateful content | 44 | -3.3195563 | 0.8967497 | -5.6685722 | -0.9705405 |
| Most | Views on hateful content | 45 | -3.3580426 | 0.9304783 | -5.7954096 | -0.9206756 |
| Most | Views on hateful content | 47 | -4.8277071 | 0.2507334 | -5.4844977 | -4.1709165 |
| Most | Views on hateful content | 48 | -4.4753683 | 0.0851427 | -4.6983977 | -4.2523388 |
| Most | Views on hateful content | 49 | -4.4418444 | 0.2347772 | -5.0568381 | -3.8268507 |
| Most | Views on hateful content | 50 | -4.7941180 | 0.2342438 | -5.4077144 | -4.1805216 |
| Most | Views on hateful content | 51 | -4.4262938 | 0.2587038 | -5.1039626 | -3.7486250 |
| Most | Views on hateful content | 52 | -4.1736391 | 0.3654987 | -5.1310546 | -3.2162235 |
| Most | Views on hateful content | 53 | -3.9917520 | 0.3108299 | -4.8059640 | -3.1775401 |
| Most | Views on hateful content | 54 | -4.4079971 | 0.2498288 | -5.0624180 | -3.7535762 |
| Most | Views on hateful content | 55 | -4.0830322 | 0.2087497 | -4.6298473 | -3.5362172 |
| Most | Views on hateful content | 56 | -3.7557110 | 0.3868926 | -4.7691676 | -2.7422544 |
| Most | Views on hateful content | 57 | -3.6160394 | 0.3422347 | -4.5125155 | -2.7195632 |
| Most | Views on hateful content | 58 | -3.5379205 | 0.3108274 | -4.3521259 | -2.7237151 |
| Most | Views on hateful content | 59 | -3.4031829 | 0.2193710 | -3.9778203 | -2.8285454 |

| sample | outcome                  | event.time | estimate   | std.error | conf.low   | conf.high  |
|--------|--------------------------|------------|------------|-----------|------------|------------|
| Middle | Views on hateful content | -44        | 0.2317459  | 0.0786647 | 0.0241140  | 0.4393777  |
| Middle | Views on hateful content | -43        | -0.0057926 | 0.0515453 | -0.1418439 | 0.1302587  |
| Middle | Views on hateful content | -42        | -0.2662493 | 0.0678558 | -0.4453514 | -0.0871471 |
| Middle | Views on hateful content | -41        | -0.0089105 | 0.0602659 | -0.1679794 | 0.1501585  |
| Middle | Views on hateful content | -40        | -0.0972873 | 0.0706165 | -0.2836763 | 0.0891016  |
| Middle | Views on hateful content | -39        | 0.2124450  | 0.0856512 | -0.0136274 | 0.4385174  |
| Middle | Views on hateful content | -38        | -0.0409854 | 0.0710608 | -0.2285471 | 0.1465764  |
| Middle | Views on hateful content | -37        | 0.0492996  | 0.0458950 | -0.0718380 | 0.1704372  |
| Middle | Views on hateful content | -36        | 0.1392956  | 0.0800060 | -0.0718766 | 0.3504677  |
| Middle | Views on hateful content | -35        | 0.0927139  | 0.1824220 | -0.3887802 | 0.5742081  |

|        |                          |     |            |           |            |           |
|--------|--------------------------|-----|------------|-----------|------------|-----------|
| Middle | Views on hateful content | -34 | 0.9530565  | 0.1125180 | 0.6560705  | 1.2500425 |
| Middle | Views on hateful content | -33 | 0.4383089  | 0.2813412 | -0.3042780 | 1.1808957 |
| Middle | Views on hateful content | -32 | 0.4794356  | 0.1642520 | 0.0459002  | 0.9129709 |
| Middle | Views on hateful content | -31 | 0.1417520  | 0.3061643 | -0.6663541 | 0.9498581 |
| Middle | Views on hateful content | -30 | 0.7604249  | 0.4260326 | -0.3640681 | 1.8849179 |
| Middle | Views on hateful content | -29 | -0.0737939 | 0.1302668 | -0.4176271 | 0.2700392 |
| Middle | Views on hateful content | -28 | -0.3870626 | 0.1533358 | -0.7917853 | 0.0176602 |
| Middle | Views on hateful content | -27 | -0.1262934 | 0.3852750 | -1.1432085 | 0.8906216 |
| Middle | Views on hateful content | -26 | -0.3677564 | 0.2503694 | -1.0285946 | 0.2930817 |
| Middle | Views on hateful content | -25 | 0.0969332  | 0.2038551 | -0.4411327 | 0.6349992 |
| Middle | Views on hateful content | -24 | -0.2365654 | 0.1471621 | -0.6249929 | 0.1518620 |
| Middle | Views on hateful content | -23 | -0.1556950 | 0.0817054 | -0.3713525 | 0.0599625 |
| Middle | Views on hateful content | -22 | 0.1150736  | 0.0739687 | -0.0801633 | 0.3103105 |
| Middle | Views on hateful content | -21 | 0.0015890  | 0.0893021 | -0.2341198 | 0.2372977 |
| Middle | Views on hateful content | -20 | -0.0299485 | 0.0904678 | -0.2687339 | 0.2088369 |
| Middle | Views on hateful content | -19 | 0.2616419  | 0.2387696 | -0.3685791 | 0.8918629 |
| Middle | Views on hateful content | -18 | 0.0771198  | 0.0731447 | -0.1159423 | 0.2701818 |
| Middle | Views on hateful content | -17 | 0.2084923  | 0.1658406 | -0.2292361 | 0.6462208 |
| Middle | Views on hateful content | -16 | 0.0170330  | 0.2561157 | -0.6589722 | 0.6930383 |
| Middle | Views on hateful content | -15 | 0.0447389  | 0.1299662 | -0.2983008 | 0.3877785 |
| Middle | Views on hateful content | -14 | 0.0070432  | 0.1440683 | -0.3732181 | 0.3873046 |
| Middle | Views on hateful content | -13 | -0.0074468 | 0.3131476 | -0.8339851 | 0.8190916 |
| Middle | Views on hateful content | -12 | -0.0153485 | 0.2017201 | -0.5477790 | 0.5170820 |
| Middle | Views on hateful content | -11 | -0.1717293 | 0.1072122 | -0.4547107 | 0.1112522 |
| Middle | Views on hateful content | -10 | -0.0511079 | 0.2062623 | -0.5955276 | 0.4933117 |
| Middle | Views on hateful content | -9  | -0.0885459 | 0.1218063 | -0.4100480 | 0.2329562 |
| Middle | Views on hateful content | -8  | 0.1687556  | 0.1528227 | -0.2346128 | 0.5721240 |
| Middle | Views on hateful content | -7  | -0.1202255 | 0.1245299 | -0.4489163 | 0.2084653 |
| Middle | Views on hateful content | -6  | -0.3021597 | 0.1610870 | -0.7273411 | 0.1230218 |
| Middle | Views on hateful content | -5  | -0.0243968 | 0.1666028 | -0.4641370 | 0.4153434 |
| Middle | Views on hateful content | -4  | -0.3399322 | 0.1894715 | -0.8400333 | 0.1601689 |
| Middle | Views on hateful content | -3  | -0.4457945 | 0.2358741 | -1.0683730 | 0.1767840 |
| Middle | Views on hateful content | -2  | 0.2004403  | 0.1846164 | -0.2868458 | 0.6877265 |
| Middle | Views on hateful content | -1  | 0.3023985  | 0.1429190 | -0.0748295 | 0.6796265 |
| Middle | Views on hateful content | 0   | 0.0589648  | 0.1495213 | -0.3356895 | 0.4536192 |
| Middle | Views on hateful content | 1   | 0.1428803  | 0.1813170 | -0.3356972 | 0.6214579 |
| Middle | Views on hateful content | 2   | 0.1882383  | 0.2166169 | -0.3835117 | 0.7599883 |
| Middle | Views on hateful content | 3   | 0.1662815  | 0.3218482 | -0.6832215 | 1.0157845 |
| Middle | Views on hateful content | 4   | 0.1626392  | 0.3887027 | -0.8633231 | 1.1886015 |
| Middle | Views on hateful content | 5   | 0.0675574  | 0.4955514 | -1.2404270 | 1.3755418 |
| Middle | Views on hateful content | 6   | 0.1997705  | 0.4502581 | -0.9886645 | 1.3882056 |

|        |                          |    |            |           |            |            |
|--------|--------------------------|----|------------|-----------|------------|------------|
| Middle | Views on hateful content | 7  | 0.3294263  | 0.4370655 | -0.8241874 | 1.4830400  |
| Middle | Views on hateful content | 8  | 0.1867906  | 0.4455619 | -0.9892489 | 1.3628301  |
| Middle | Views on hateful content | 9  | 0.0089206  | 0.4289836 | -1.1233613 | 1.1412026  |
| Middle | Views on hateful content | 10 | 0.0872879  | 0.4964491 | -1.2230660 | 1.3976418  |
| Middle | Views on hateful content | 11 | 0.0865160  | 0.5592585 | -1.3896203 | 1.5626523  |
| Middle | Views on hateful content | 12 | 0.2007273  | 0.5628541 | -1.2848995 | 1.6863542  |
| Middle | Views on hateful content | 13 | 0.0397407  | 0.7635188 | -1.9755310 | 2.0550123  |
| Middle | Views on hateful content | 14 | -0.1015847 | 0.6976468 | -1.9429904 | 1.7398211  |
| Middle | Views on hateful content | 15 | 0.3596814  | 1.0408856 | -2.3876868 | 3.1070495  |
| Middle | Views on hateful content | 16 | 0.4034497  | 1.0921214 | -2.4791530 | 3.2860523  |
| Middle | Views on hateful content | 17 | 0.2958199  | 1.2676436 | -3.0500654 | 3.6417052  |
| Middle | Views on hateful content | 18 | 0.3285400  | 1.2738632 | -3.0337616 | 3.6908416  |
| Middle | Views on hateful content | 19 | 0.2910259  | 1.1377641 | -2.7120486 | 3.2941004  |
| Middle | Views on hateful content | 20 | -0.3314131 | 0.7639706 | -2.3478773 | 1.6850512  |
| Middle | Views on hateful content | 21 | -0.0319482 | 0.7749530 | -2.0774000 | 2.0135035  |
| Middle | Views on hateful content | 22 | -0.1085816 | 0.7982679 | -2.2155718 | 1.9984087  |
| Middle | Views on hateful content | 23 | -0.4346352 | 0.8152592 | -2.5864734 | 1.7172030  |
| Middle | Views on hateful content | 24 | -0.2319190 | 0.8336837 | -2.4323878 | 1.9685498  |
| Middle | Views on hateful content | 25 | -0.2737800 | 0.9125964 | -2.6825350 | 2.1349751  |
| Middle | Views on hateful content | 26 | -0.3984898 | 0.7630182 | -2.4124401 | 1.6154606  |
| Middle | Views on hateful content | 27 | -1.3081898 | 0.2917844 | -2.0783408 | -0.5380387 |
| Middle | Views on hateful content | 28 | -1.2805779 | 0.4074316 | -2.3559744 | -0.2051815 |
| Middle | Views on hateful content | 29 | -2.0992370 | 0.8323879 | -4.2962854 | 0.0978114  |
| Middle | Views on hateful content | 30 | -2.2931306 | 0.7724301 | -4.3319232 | -0.2543380 |
| Middle | Views on hateful content | 31 | -2.6864325 | 0.2897918 | -3.4513242 | -1.9215409 |
| Middle | Views on hateful content | 32 | -2.6482354 | 0.4552459 | -3.8498354 | -1.4466355 |
| Middle | Views on hateful content | 33 | -2.6244476 | 0.4482132 | -3.8074852 | -1.4414100 |
| Middle | Views on hateful content | 34 | -1.9723274 | 0.3499134 | -2.8959073 | -1.0487476 |
| Middle | Views on hateful content | 35 | -1.8199780 | 0.3830339 | -2.8309779 | -0.8089780 |
| Middle | Views on hateful content | 36 | -1.7973997 | 0.4229762 | -2.9138253 | -0.6809740 |
| Middle | Views on hateful content | 37 | -2.0728129 | 0.2894146 | -2.8367090 | -1.3089168 |
| Middle | Views on hateful content | 38 | -2.0057922 | 0.3429368 | -2.9109576 | -1.1006269 |
| Middle | Views on hateful content | 39 | -2.0276596 | 0.3068425 | -2.8375560 | -1.2177632 |
| Middle | Views on hateful content | 40 | -1.9712223 | 0.3822671 | -2.9801982 | -0.9622464 |
| Middle | Views on hateful content | 41 | -1.9193559 | 0.4794289 | -3.1847858 | -0.6539260 |
| Middle | Views on hateful content | 42 | -1.1636609 | 0.7988959 | -3.2723089 | 0.9449872  |
| Middle | Views on hateful content | 43 | -2.7846582 | 0.8615671 | -5.0587239 | -0.5105926 |
| Middle | Views on hateful content | 44 | -2.7433546 | 0.8106882 | -4.8831277 | -0.6035815 |
| Middle | Views on hateful content | 45 | -2.5643090 | 1.0117001 | -5.2346436 | 0.1060257  |
| Middle | Views on hateful content | 47 | -3.1723006 | 0.4266919 | -4.2985338 | -2.0460674 |
| Middle | Views on hateful content | 48 | -2.9428380 | 0.1511076 | -3.3416792 | -2.5439968 |

|        |                          |    |            |           |            |            |
|--------|--------------------------|----|------------|-----------|------------|------------|
| Middle | Views on hateful content | 49 | -2.9402324 | 0.4208919 | -4.0511567 | -1.8293081 |
| Middle | Views on hateful content | 50 | -3.1450143 | 0.4502365 | -4.3333922 | -1.9566365 |
| Middle | Views on hateful content | 51 | -2.9989901 | 0.3602775 | -3.9499254 | -2.0480548 |
| Middle | Views on hateful content | 52 | -3.0261504 | 0.3838122 | -4.0392046 | -2.0130962 |
| Middle | Views on hateful content | 53 | -2.8809918 | 0.3309439 | -3.7545026 | -2.0074810 |
| Middle | Views on hateful content | 54 | -3.0509953 | 0.4237859 | -4.1695581 | -1.9324325 |
| Middle | Views on hateful content | 55 | -2.8476772 | 0.3364297 | -3.7356675 | -1.9596870 |
| Middle | Views on hateful content | 56 | -2.9187644 | 0.9685861 | -5.4753016 | -0.3622272 |
| Middle | Views on hateful content | 57 | -2.9029090 | 1.1073810 | -5.8257886 | 0.0199706  |
| Middle | Views on hateful content | 58 | -2.6559013 | 0.9366146 | -5.1280512 | -0.1837514 |
| Middle | Views on hateful content | 59 | -2.6071689 | 1.0748480 | -5.4441793 | 0.2298414  |

| sample | outcome                  | event.time | estimate   | std.error | conf.low   | conf.high |
|--------|--------------------------|------------|------------|-----------|------------|-----------|
| Least  | Views on hateful content | -44        | 0.0889137  | 0.0982886 | -0.1711300 | 0.3489574 |
| Least  | Views on hateful content | -43        | 0.0083944  | 0.0683671 | -0.1724856 | 0.1892744 |
| Least  | Views on hateful content | -42        | 0.0103021  | 0.0695645 | -0.1737458 | 0.1943501 |
| Least  | Views on hateful content | -41        | -0.0918864 | 0.0834235 | -0.3126015 | 0.1288286 |
| Least  | Views on hateful content | -40        | 0.0455610  | 0.0868850 | -0.1843121 | 0.2754340 |
| Least  | Views on hateful content | -39        | 0.0147353  | 0.0947776 | -0.2360192 | 0.2654899 |
| Least  | Views on hateful content | -38        | 0.0305449  | 0.0597769 | -0.1276077 | 0.1886975 |
| Least  | Views on hateful content | -37        | 0.0420841  | 0.0473364 | -0.0831547 | 0.1673228 |
| Least  | Views on hateful content | -36        | -0.0057757 | 0.0790869 | -0.2150173 | 0.2034659 |
| Least  | Views on hateful content | -35        | 0.1355632  | 0.1945627 | -0.3791944 | 0.6503208 |
| Least  | Views on hateful content | -34        | 0.3130993  | 0.1061994 | 0.0321259  | 0.5940727 |
| Least  | Views on hateful content | -33        | 0.2655132  | 0.2299671 | -0.3429144 | 0.8739409 |
| Least  | Views on hateful content | -32        | 0.2732977  | 0.2247190 | -0.3212450 | 0.8678404 |
| Least  | Views on hateful content | -31        | 0.1691174  | 0.2093695 | -0.3848149 | 0.7230497 |
| Least  | Views on hateful content | -30        | 0.6212510  | 0.3630068 | -0.3391621 | 1.5816640 |
| Least  | Views on hateful content | -29        | -0.0349158 | 0.0997780 | -0.2989002 | 0.2290686 |
| Least  | Views on hateful content | -28        | 0.0946242  | 0.0764753 | -0.1077078 | 0.2969561 |
| Least  | Views on hateful content | -27        | -0.1792049 | 0.4545103 | -1.3817104 | 1.0233005 |
| Least  | Views on hateful content | -26        | -0.1851533 | 0.3025307 | -0.9855636 | 0.6152570 |
| Least  | Views on hateful content | -25        | -0.0643641 | 0.1829204 | -0.5483195 | 0.4195913 |
| Least  | Views on hateful content | -24        | -0.0946536 | 0.1657010 | -0.5330514 | 0.3437442 |
| Least  | Views on hateful content | -23        | 0.1069538  | 0.1304316 | -0.2381313 | 0.4520388 |
| Least  | Views on hateful content | -22        | -0.1047055 | 0.1039015 | -0.3795993 | 0.1701883 |
| Least  | Views on hateful content | -21        | 0.1820615  | 0.0994899 | -0.0811606 | 0.4452836 |
| Least  | Views on hateful content | -20        | -0.0583404 | 0.0840548 | -0.2807257 | 0.1640449 |
| Least  | Views on hateful content | -19        | 0.3520287  | 0.1793789 | -0.1225569 | 0.8266142 |
| Least  | Views on hateful content | -18        | 0.0816233  | 0.1161882 | -0.2257777 | 0.3890242 |
| Least  | Views on hateful content | -17        | 0.0245445  | 0.1486435 | -0.3687240 | 0.4178129 |

|       |                          |     |            |           |            |           |
|-------|--------------------------|-----|------------|-----------|------------|-----------|
| Least | Views on hateful content | -16 | 0.2289855  | 0.1863598 | -0.2640696 | 0.7220406 |
| Least | Views on hateful content | -15 | -0.0789690 | 0.0892418 | -0.3150773 | 0.1571394 |
| Least | Views on hateful content | -14 | -0.0427898 | 0.1332080 | -0.3952204 | 0.3096408 |
| Least | Views on hateful content | -13 | 0.0512470  | 0.2703222 | -0.6639488 | 0.7664428 |
| Least | Views on hateful content | -12 | -0.2057818 | 0.1548039 | -0.6153489 | 0.2037853 |
| Least | Views on hateful content | -11 | 0.0298321  | 0.0817866 | -0.1865520 | 0.2462163 |
| Least | Views on hateful content | -10 | -0.1590357 | 0.1569375 | -0.5742477 | 0.2561763 |
| Least | Views on hateful content | -9  | -0.2096353 | 0.1144540 | -0.5124481 | 0.0931774 |
| Least | Views on hateful content | -8  | 0.1553296  | 0.1105263 | -0.1370917 | 0.4477510 |
| Least | Views on hateful content | -7  | 0.0730612  | 0.1051557 | -0.2051510 | 0.3512733 |
| Least | Views on hateful content | -6  | -0.2218845 | 0.1537672 | -0.6287088 | 0.1849399 |
| Least | Views on hateful content | -5  | -0.1615371 | 0.1728109 | -0.6187458 | 0.2956716 |
| Least | Views on hateful content | -4  | -0.1426440 | 0.1314477 | -0.4904174 | 0.2051295 |
| Least | Views on hateful content | -3  | -0.4279461 | 0.2441699 | -1.0739504 | 0.2180582 |
| Least | Views on hateful content | -2  | 0.1525317  | 0.1678388 | -0.2915222 | 0.5965856 |
| Least | Views on hateful content | -1  | 0.1285934  | 0.1441512 | -0.2527899 | 0.5099766 |
| Least | Views on hateful content | 0   | 0.0262655  | 0.1726825 | -0.4306035 | 0.4831345 |
| Least | Views on hateful content | 1   | 0.2089800  | 0.2624194 | -0.4853072 | 0.9032672 |
| Least | Views on hateful content | 2   | 0.1939742  | 0.2698228 | -0.5199005 | 0.9078489 |
| Least | Views on hateful content | 3   | 0.0513960  | 0.3222289 | -0.8011303 | 0.9039223 |
| Least | Views on hateful content | 4   | -0.0263594 | 0.3223937 | -0.8793218 | 0.8266029 |
| Least | Views on hateful content | 5   | -0.0669016 | 0.4316295 | -1.2088708 | 1.0750677 |
| Least | Views on hateful content | 6   | 0.2127194  | 0.4178293 | -0.8927383 | 1.3181771 |
| Least | Views on hateful content | 7   | 0.2407987  | 0.4526453 | -0.9567723 | 1.4383698 |
| Least | Views on hateful content | 8   | 0.0164170  | 0.3781824 | -0.9841464 | 1.0169805 |
| Least | Views on hateful content | 9   | -0.0526242 | 0.4311821 | -1.1934097 | 1.0881614 |
| Least | Views on hateful content | 10  | -0.0938476 | 0.5011016 | -1.4196203 | 1.2319250 |
| Least | Views on hateful content | 11  | -0.1457281 | 0.5170873 | -1.5137943 | 1.2223382 |
| Least | Views on hateful content | 12  | -0.1306611 | 0.4911208 | -1.4300276 | 1.1687053 |
| Least | Views on hateful content | 13  | -0.2651119 | 0.5322619 | -1.6733260 | 1.1431022 |
| Least | Views on hateful content | 14  | -0.3211173 | 0.5012923 | -1.6473945 | 1.0051598 |
| Least | Views on hateful content | 15  | 0.1239036  | 0.7281551 | -1.8025882 | 2.0503954 |
| Least | Views on hateful content | 16  | 0.0709878  | 0.7644338 | -1.9514873 | 2.0934629 |
| Least | Views on hateful content | 17  | -0.1063238 | 0.8531420 | -2.3634956 | 2.1508479 |
| Least | Views on hateful content | 18  | -0.1028395 | 0.9226402 | -2.5438837 | 2.3382047 |
| Least | Views on hateful content | 19  | -0.1014069 | 0.8281769 | -2.2925282 | 2.0897144 |
| Least | Views on hateful content | 20  | -0.5613616 | 0.5140619 | -1.9214236 | 0.7987004 |
| Least | Views on hateful content | 21  | -0.2573461 | 0.5606792 | -1.7407443 | 1.2260520 |
| Least | Views on hateful content | 22  | -0.3304276 | 0.5894752 | -1.8900118 | 1.2291565 |
| Least | Views on hateful content | 23  | -0.6218938 | 0.6011894 | -2.2124704 | 0.9686828 |
| Least | Views on hateful content | 24  | -0.4656685 | 0.5621187 | -1.9528752 | 1.0215383 |



|       |                          |    |            |           |            |            |
|-------|--------------------------|----|------------|-----------|------------|------------|
| Least | Views on hateful content | 25 | -0.5455824 | 0.6226677 | -2.1929844 | 1.1018196  |
| Least | Views on hateful content | 26 | -0.5488905 | 0.5483844 | -1.9997600 | 0.9019789  |
| Least | Views on hateful content | 27 | -1.3045764 | 0.2285805 | -1.9093355 | -0.6998172 |
| Least | Views on hateful content | 28 | -1.3460545 | 0.2746644 | -2.0727386 | -0.6193705 |
| Least | Views on hateful content | 29 | -2.1419102 | 0.1878192 | -2.6388264 | -1.6449940 |
| Least | Views on hateful content | 30 | -2.2687899 | 0.2427248 | -2.9109710 | -1.6266088 |
| Least | Views on hateful content | 31 | -2.4379800 | 0.3520898 | -3.3695098 | -1.5064502 |
| Least | Views on hateful content | 32 | -2.4330890 | 0.3988325 | -3.4882865 | -1.3778914 |
| Least | Views on hateful content | 33 | -2.2318913 | 0.5174738 | -3.6009803 | -0.8628023 |
| Least | Views on hateful content | 34 | -1.9165989 | 0.3947231 | -2.9609244 | -0.8722734 |
| Least | Views on hateful content | 35 | -1.8853222 | 0.4706696 | -3.1305806 | -0.6400639 |
| Least | Views on hateful content | 36 | -1.8016969 | 0.3936133 | -2.8430859 | -0.7603078 |
| Least | Views on hateful content | 37 | -2.0769044 | 0.2404335 | -2.7130233 | -1.4407854 |
| Least | Views on hateful content | 38 | -1.9526363 | 0.2808579 | -2.6957066 | -1.2095661 |
| Least | Views on hateful content | 39 | -1.9341857 | 0.3266302 | -2.7983565 | -1.0700150 |
| Least | Views on hateful content | 40 | -1.9026289 | 0.4067139 | -2.9786785 | -0.8265794 |
| Least | Views on hateful content | 41 | -1.9043893 | 0.5036954 | -3.2370246 | -0.5717541 |
| Least | Views on hateful content | 42 | -1.1710631 | 0.9723195 | -3.7435448 | 1.4014186  |
| Least | Views on hateful content | 43 | -3.2773874 | 0.4284099 | -4.4108384 | -2.1439364 |
| Least | Views on hateful content | 44 | -3.0459772 | 0.4110862 | -4.1335948 | -1.9583596 |
| Least | Views on hateful content | 45 | -3.0505534 | 0.4500816 | -4.2413416 | -1.8597651 |
| Least | Views on hateful content | 47 | -2.6560134 | 0.3664745 | -3.6256009 | -1.6864260 |
| Least | Views on hateful content | 48 | -2.4721133 | 0.1352251 | -2.8298807 | -2.1143460 |
| Least | Views on hateful content | 49 | -2.3754836 | 0.3614929 | -3.3318914 | -1.4190757 |
| Least | Views on hateful content | 50 | -2.6236365 | 0.3524881 | -3.5562199 | -1.6910530 |
| Least | Views on hateful content | 51 | -2.6356718 | 0.4278929 | -3.7677552 | -1.5035885 |
| Least | Views on hateful content | 52 | -2.5824736 | 0.3714773 | -3.5652972 | -1.5996500 |
| Least | Views on hateful content | 53 | -2.6140503 | 0.3295871 | -3.4860443 | -1.7420564 |
| Least | Views on hateful content | 54 | -2.6576577 | 0.5116213 | -4.0112625 | -1.3040528 |
| Least | Views on hateful content | 55 | -2.5164623 | 0.4449708 | -3.6937289 | -1.3391957 |
| Least | Views on hateful content | 56 | -3.3681106 | 0.8478323 | -5.6112345 | -1.1249868 |
| Least | Views on hateful content | 57 | -3.0745589 | 0.3872878 | -4.0992126 | -2.0499052 |
| Least | Views on hateful content | 58 | -3.2200310 | 0.3751821 | -4.2126564 | -2.2274056 |
| Least | Views on hateful content | 59 | -2.9557518 | 0.3264679 | -3.8194934 | -2.0920102 |

## Views on hateful content/total views

Average effect by length of exposure (Callaway and Sant'Anna)

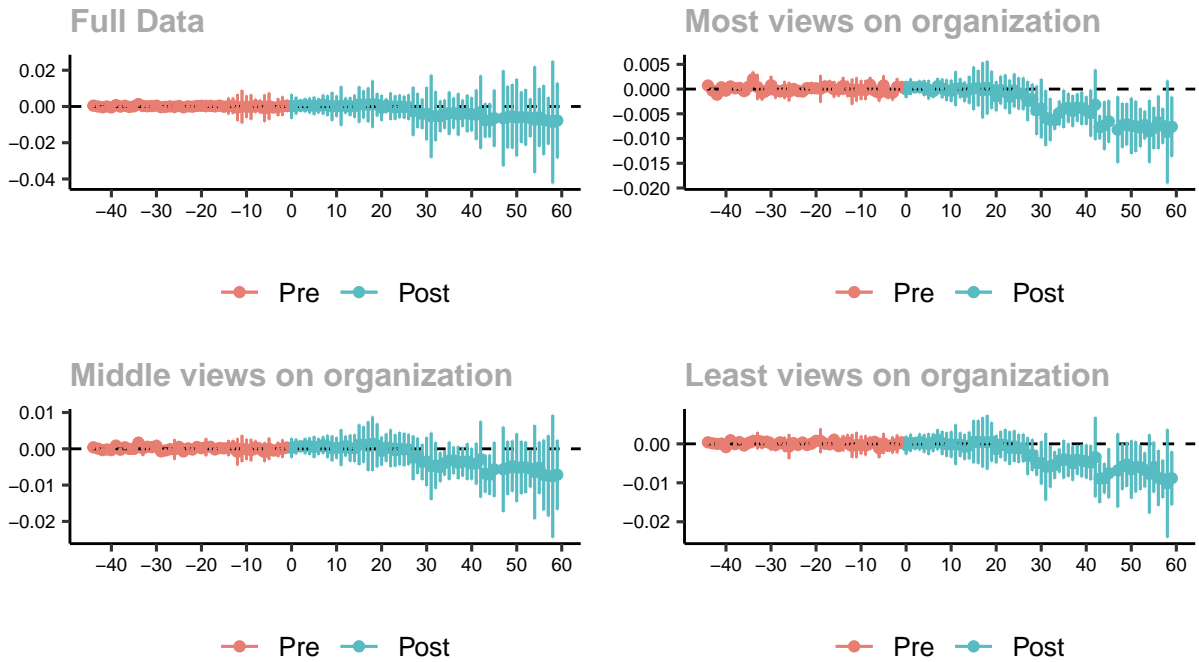

Long timeframe with sampled control groups

| sample | outcome                              | event.time | estimate   | std.error | conf.low   | conf.high |
|--------|--------------------------------------|------------|------------|-----------|------------|-----------|
| Full   | Views on hateful content/total views | -44        | 0.0004586  | 0.0002344 | -0.0001289 | 0.0010462 |
| Full   | Views on hateful content/total views | -43        | 0.0000182  | 0.0002482 | -0.0006039 | 0.0006402 |
| Full   | Views on hateful content/total views | -42        | -0.0004571 | 0.0002539 | -0.0010934 | 0.0001791 |
| Full   | Views on hateful content/total views | -41        | 0.0000145  | 0.0002571 | -0.0006298 | 0.0006588 |
| Full   | Views on hateful content/total views | -40        | -0.0004790 | 0.0002293 | -0.0010538 | 0.0000957 |
| Full   | Views on hateful content/total views | -39        | 0.0007738  | 0.0002218 | 0.0002181  | 0.0013296 |
| Full   | Views on hateful content/total views | -38        | -0.0000702 | 0.0002211 | -0.0006243 | 0.0004839 |
| Full   | Views on hateful content/total views | -37        | 0.0003822  | 0.0002195 | -0.0001680 | 0.0009324 |
| Full   | Views on hateful content/total views | -36        | -0.0002577 | 0.0002701 | -0.0009347 | 0.0004193 |
| Full   | Views on hateful content/total views | -35        | 0.0000872  | 0.0005461 | -0.0012814 | 0.0014558 |
| Full   | Views on hateful content/total views | -34        | 0.0013370  | 0.0005567 | -0.0000582 | 0.0027322 |
| Full   | Views on hateful content/total views | -33        | 0.0002605  | 0.0008689 | -0.0019172 | 0.0024381 |
| Full   | Views on hateful content/total views | -32        | 0.0001014  | 0.0005083 | -0.0011725 | 0.0013752 |
| Full   | Views on hateful content/total views | -31        | 0.0002374  | 0.0004091 | -0.0007878 | 0.0012626 |
| Full   | Views on hateful content/total views | -30        | 0.0004423  | 0.0006756 | -0.0012508 | 0.0021354 |
| Full   | Views on hateful content/total views | -29        | -0.0003957 | 0.0005831 | -0.0018571 | 0.0010656 |
| Full   | Views on hateful content/total views | -28        | -0.0002090 | 0.0002486 | -0.0008321 | 0.0004141 |
| Full   | Views on hateful content/total views | -27        | 0.0000552  | 0.0007930 | -0.0019323 | 0.0020426 |
| Full   | Views on hateful content/total views | -26        | -0.0002054 | 0.0012504 | -0.0033390 | 0.0029283 |

|      |                                      |     |            |           |            |           |
|------|--------------------------------------|-----|------------|-----------|------------|-----------|
| Full | Views on hateful content/total views | -25 | 0.0002613  | 0.0004112 | -0.0007691 | 0.0012917 |
| Full | Views on hateful content/total views | -24 | -0.0004329 | 0.0004221 | -0.0014907 | 0.0006250 |
| Full | Views on hateful content/total views | -23 | 0.0000700  | 0.0003317 | -0.0007612 | 0.0009012 |
| Full | Views on hateful content/total views | -22 | -0.0001198 | 0.0002691 | -0.0007942 | 0.0005545 |
| Full | Views on hateful content/total views | -21 | 0.0002815  | 0.0004476 | -0.0008401 | 0.0014032 |
| Full | Views on hateful content/total views | -20 | 0.0003651  | 0.0004208 | -0.0006895 | 0.0014198 |
| Full | Views on hateful content/total views | -19 | 0.0002334  | 0.0012401 | -0.0028745 | 0.0033412 |
| Full | Views on hateful content/total views | -18 | 0.0003181  | 0.0005126 | -0.0009665 | 0.0016027 |
| Full | Views on hateful content/total views | -17 | 0.0000486  | 0.0004043 | -0.0009646 | 0.0010618 |
| Full | Views on hateful content/total views | -16 | 0.0004430  | 0.0004551 | -0.0006977 | 0.0015836 |
| Full | Views on hateful content/total views | -15 | -0.0001078 | 0.0005284 | -0.0014321 | 0.0012165 |
| Full | Views on hateful content/total views | -14 | 0.0002595  | 0.0018142 | -0.0042871 | 0.0048062 |
| Full | Views on hateful content/total views | -13 | 0.0003887  | 0.0017681 | -0.0040425 | 0.0048199 |
| Full | Views on hateful content/total views | -12 | -0.0005816 | 0.0029631 | -0.0080076 | 0.0068444 |
| Full | Views on hateful content/total views | -11 | -0.0001019 | 0.0036538 | -0.0092590 | 0.0090553 |
| Full | Views on hateful content/total views | -10 | -0.0001643 | 0.0024740 | -0.0063645 | 0.0060359 |
| Full | Views on hateful content/total views | -9  | -0.0003096 | 0.0027519 | -0.0072063 | 0.0065871 |
| Full | Views on hateful content/total views | -8  | 0.0004066  | 0.0015098 | -0.0033772 | 0.0041904 |
| Full | Views on hateful content/total views | -7  | 0.0000079  | 0.0014755 | -0.0036899 | 0.0037058 |
| Full | Views on hateful content/total views | -6  | -0.0010000 | 0.0030013 | -0.0085219 | 0.0065218 |
| Full | Views on hateful content/total views | -5  | 0.0001628  | 0.0029505 | -0.0072317 | 0.0075572 |
| Full | Views on hateful content/total views | -4  | -0.0005907 | 0.0010137 | -0.0031311 | 0.0019497 |
| Full | Views on hateful content/total views | -3  | -0.0003718 | 0.0019314 | -0.0052121 | 0.0044686 |
| Full | Views on hateful content/total views | -2  | 0.0001740  | 0.0020952 | -0.0050768 | 0.0054248 |
| Full | Views on hateful content/total views | -1  | 0.0003962  | 0.0012846 | -0.0028231 | 0.0036155 |
| Full | Views on hateful content/total views | 0   | 0.0000134  | 0.0026929 | -0.0067355 | 0.0067623 |
| Full | Views on hateful content/total views | 1   | 0.0005136  | 0.0019243 | -0.0043089 | 0.0053362 |
| Full | Views on hateful content/total views | 2   | 0.0004591  | 0.0013417 | -0.0029035 | 0.0038217 |
| Full | Views on hateful content/total views | 3   | 0.0006886  | 0.0015399 | -0.0031706 | 0.0045479 |
| Full | Views on hateful content/total views | 4   | 0.0005230  | 0.0017035 | -0.0037462 | 0.0047922 |
| Full | Views on hateful content/total views | 5   | 0.0003642  | 0.0020016 | -0.0046522 | 0.0053807 |
| Full | Views on hateful content/total views | 6   | 0.0003822  | 0.0016398 | -0.0037272 | 0.0044917 |
| Full | Views on hateful content/total views | 7   | 0.0010368  | 0.0021609 | -0.0043787 | 0.0064524 |
| Full | Views on hateful content/total views | 8   | 0.0005027  | 0.0022495 | -0.0051348 | 0.0061403 |
| Full | Views on hateful content/total views | 9   | 0.0000501  | 0.0031502 | -0.0078447 | 0.0079450 |
| Full | Views on hateful content/total views | 10  | 0.0001603  | 0.0023144 | -0.0056400 | 0.0059605 |
| Full | Views on hateful content/total views | 11  | 0.0002875  | 0.0043234 | -0.0105476 | 0.0111225 |
| Full | Views on hateful content/total views | 12  | 0.0004852  | 0.0017439 | -0.0038852 | 0.0048557 |
| Full | Views on hateful content/total views | 13  | -0.0000654 | 0.0020514 | -0.0052066 | 0.0050759 |
| Full | Views on hateful content/total views | 14  | 0.0001332  | 0.0025084 | -0.0061534 | 0.0064198 |
| Full | Views on hateful content/total views | 15  | 0.0011027  | 0.0039509 | -0.0087988 | 0.0110042 |

|      |                                      |    |            |           |            |           |
|------|--------------------------------------|----|------------|-----------|------------|-----------|
| Full | Views on hateful content/total views | 16 | 0.0011481  | 0.0030627 | -0.0065275 | 0.0088238 |
| Full | Views on hateful content/total views | 17 | 0.0008659  | 0.0038009 | -0.0086598 | 0.0103916 |
| Full | Views on hateful content/total views | 18 | 0.0013453  | 0.0051638 | -0.0115960 | 0.0142866 |
| Full | Views on hateful content/total views | 19 | 0.0009786  | 0.0025635 | -0.0054458 | 0.0074031 |
| Full | Views on hateful content/total views | 20 | -0.0007883 | 0.0028442 | -0.0079162 | 0.0063396 |
| Full | Views on hateful content/total views | 21 | 0.0003340  | 0.0015832 | -0.0036338 | 0.0043017 |
| Full | Views on hateful content/total views | 22 | 0.0001106  | 0.0030007 | -0.0074097 | 0.0076310 |
| Full | Views on hateful content/total views | 23 | -0.0005920 | 0.0026651 | -0.0072711 | 0.0060871 |
| Full | Views on hateful content/total views | 24 | 0.0000564  | 0.0025720 | -0.0063894 | 0.0065022 |
| Full | Views on hateful content/total views | 25 | -0.0003724 | 0.0024851 | -0.0066006 | 0.0058558 |
| Full | Views on hateful content/total views | 26 | -0.0003455 | 0.0028028 | -0.0073698 | 0.0066787 |
| Full | Views on hateful content/total views | 27 | -0.0026236 | 0.0053584 | -0.0160528 | 0.0108055 |
| Full | Views on hateful content/total views | 28 | -0.0022140 | 0.0038337 | -0.0118219 | 0.0073938 |
| Full | Views on hateful content/total views | 29 | -0.0040883 | 0.0033250 | -0.0124213 | 0.0042448 |
| Full | Views on hateful content/total views | 30 | -0.0039381 | 0.0058369 | -0.0185665 | 0.0106902 |
| Full | Views on hateful content/total views | 31 | -0.0053913 | 0.0091188 | -0.0282445 | 0.0174619 |
| Full | Views on hateful content/total views | 32 | -0.0053296 | 0.0054600 | -0.0190132 | 0.0083540 |
| Full | Views on hateful content/total views | 33 | -0.0054398 | 0.0034588 | -0.0141080 | 0.0032284 |
| Full | Views on hateful content/total views | 34 | -0.0042554 | 0.0031808 | -0.0122270 | 0.0037162 |
| Full | Views on hateful content/total views | 35 | -0.0036719 | 0.0047266 | -0.0155176 | 0.0081738 |
| Full | Views on hateful content/total views | 36 | -0.0036428 | 0.0033895 | -0.0121374 | 0.0048519 |
| Full | Views on hateful content/total views | 37 | -0.0043430 | 0.0046346 | -0.0159580 | 0.0072720 |
| Full | Views on hateful content/total views | 38 | -0.0037615 | 0.0029927 | -0.0112616 | 0.0037386 |
| Full | Views on hateful content/total views | 39 | -0.0038549 | 0.0041005 | -0.0141313 | 0.0064215 |
| Full | Views on hateful content/total views | 40 | -0.0042889 | 0.0037216 | -0.0136158 | 0.0050380 |
| Full | Views on hateful content/total views | 41 | -0.0045079 | 0.0054917 | -0.0182711 | 0.0092553 |
| Full | Views on hateful content/total views | 42 | -0.0031023 | 0.0080416 | -0.0232557 | 0.0170511 |
| Full | Views on hateful content/total views | 43 | -0.0076718 | 0.0037639 | -0.0171048 | 0.0017611 |
| Full | Views on hateful content/total views | 44 | -0.0076562 | 0.0037279 | -0.0169990 | 0.0016866 |
| Full | Views on hateful content/total views | 45 | -0.0064404 | 0.0062366 | -0.0220703 | 0.0091896 |
| Full | Views on hateful content/total views | 47 | -0.0065352 | 0.0105283 | -0.0329208 | 0.0198504 |
| Full | Views on hateful content/total views | 48 | -0.0058301 | 0.0068552 | -0.0230103 | 0.0113501 |
| Full | Views on hateful content/total views | 49 | -0.0053818 | 0.0070871 | -0.0231432 | 0.0123796 |
| Full | Views on hateful content/total views | 50 | -0.0060948 | 0.0085091 | -0.0274199 | 0.0152304 |
| Full | Views on hateful content/total views | 51 | -0.0059163 | 0.0056378 | -0.0200455 | 0.0082128 |
| Full | Views on hateful content/total views | 52 | -0.0059924 | 0.0061824 | -0.0214864 | 0.0095016 |
| Full | Views on hateful content/total views | 53 | -0.0062546 | 0.0042347 | -0.0168674 | 0.0043583 |
| Full | Views on hateful content/total views | 54 | -0.0073092 | 0.0117220 | -0.0366864 | 0.0220680 |
| Full | Views on hateful content/total views | 55 | -0.0060441 | 0.0064367 | -0.0221754 | 0.0100872 |
| Full | Views on hateful content/total views | 56 | -0.0074521 | 0.0076597 | -0.0266485 | 0.0117443 |
| Full | Views on hateful content/total views | 57 | -0.0078546 | 0.0052217 | -0.0209410 | 0.0052318 |

|      |                                      |    |            |           |            |           |
|------|--------------------------------------|----|------------|-----------|------------|-----------|
| Full | Views on hateful content/total views | 58 | -0.0086134 | 0.0134767 | -0.0423881 | 0.0251612 |
| Full | Views on hateful content/total views | 59 | -0.0077475 | 0.0082999 | -0.0285483 | 0.0130533 |

| sample | outcome                              | event.time | estimate   | std.error | conf.low   | conf.high  |
|--------|--------------------------------------|------------|------------|-----------|------------|------------|
| Most   | Views on hateful content/total views | -44        | 0.0007178  | 0.0002727 | 0.0000054  | 0.0014303  |
| Most   | Views on hateful content/total views | -43        | -0.0003128 | 0.0002361 | -0.0009297 | 0.0003040  |
| Most   | Views on hateful content/total views | -42        | -0.0011298 | 0.0002664 | -0.0018257 | -0.0004338 |
| Most   | Views on hateful content/total views | -41        | 0.0003595  | 0.0002494 | -0.0002921 | 0.0010111  |
| Most   | Views on hateful content/total views | -40        | -0.0003148 | 0.0002264 | -0.0009064 | 0.0002768  |
| Most   | Views on hateful content/total views | -39        | 0.0005339  | 0.0003532 | -0.0003890 | 0.0014568  |
| Most   | Views on hateful content/total views | -38        | 0.0001621  | 0.0002831 | -0.0005777 | 0.0009019  |
| Most   | Views on hateful content/total views | -37        | 0.0002371  | 0.0002070 | -0.0003038 | 0.0007780  |
| Most   | Views on hateful content/total views | -36        | -0.0004139 | 0.0003060 | -0.0012135 | 0.0003857  |
| Most   | Views on hateful content/total views | -35        | 0.0004568  | 0.0006198 | -0.0011625 | 0.0020761  |
| Most   | Views on hateful content/total views | -34        | 0.0020139  | 0.0005786 | 0.0005022  | 0.0035256  |
| Most   | Views on hateful content/total views | -33        | 0.0004128  | 0.0009764 | -0.0021383 | 0.0029640  |
| Most   | Views on hateful content/total views | -32        | -0.0007489 | 0.0005767 | -0.0022558 | 0.0007579  |
| Most   | Views on hateful content/total views | -31        | -0.0002990 | 0.0005014 | -0.0016090 | 0.0010109  |
| Most   | Views on hateful content/total views | -30        | 0.0007841  | 0.0007060 | -0.0010606 | 0.0026288  |
| Most   | Views on hateful content/total views | -29        | -0.0002171 | 0.0006392 | -0.0018872 | 0.0014531  |
| Most   | Views on hateful content/total views | -28        | -0.0004740 | 0.0003852 | -0.0014803 | 0.0005324  |
| Most   | Views on hateful content/total views | -27        | -0.0001638 | 0.0006831 | -0.0019487 | 0.0016211  |
| Most   | Views on hateful content/total views | -26        | -0.0005375 | 0.0007359 | -0.0024602 | 0.0013853  |
| Most   | Views on hateful content/total views | -25        | 0.0000278  | 0.0003608 | -0.0009149 | 0.0009705  |
| Most   | Views on hateful content/total views | -24        | -0.0003950 | 0.0003941 | -0.0014247 | 0.0006348  |
| Most   | Views on hateful content/total views | -23        | -0.0004903 | 0.0003132 | -0.0013085 | 0.0003280  |
| Most   | Views on hateful content/total views | -22        | 0.0002008  | 0.0002486 | -0.0004488 | 0.0008504  |
| Most   | Views on hateful content/total views | -21        | 0.0002055  | 0.0004379 | -0.0009385 | 0.0013495  |
| Most   | Views on hateful content/total views | -20        | 0.0001529  | 0.0003336 | -0.0007188 | 0.0010245  |
| Most   | Views on hateful content/total views | -19        | 0.0000514  | 0.0010543 | -0.0027031 | 0.0028060  |
| Most   | Views on hateful content/total views | -18        | 0.0005196  | 0.0004361 | -0.0006197 | 0.0016589  |
| Most   | Views on hateful content/total views | -17        | 0.0005041  | 0.0004787 | -0.0007466 | 0.0017548  |
| Most   | Views on hateful content/total views | -16        | -0.0000528 | 0.0006248 | -0.0016853 | 0.0015797  |
| Most   | Views on hateful content/total views | -15        | -0.0000701 | 0.0005544 | -0.0015186 | 0.0013784  |
| Most   | Views on hateful content/total views | -14        | 0.0006264  | 0.0006703 | -0.0011248 | 0.0023777  |
| Most   | Views on hateful content/total views | -13        | 0.0000462  | 0.0006167 | -0.0015651 | 0.0016576  |
| Most   | Views on hateful content/total views | -12        | -0.0005223 | 0.0009946 | -0.0031209 | 0.0020763  |
| Most   | Views on hateful content/total views | -11        | -0.0000825 | 0.0009182 | -0.0024817 | 0.0023166  |
| Most   | Views on hateful content/total views | -10        | -0.0001977 | 0.0007546 | -0.0021692 | 0.0017738  |
| Most   | Views on hateful content/total views | -9         | -0.0001876 | 0.0007573 | -0.0021662 | 0.0017911  |
| Most   | Views on hateful content/total views | -8         | 0.0008905  | 0.0005722 | -0.0006045 | 0.0023856  |

|      |                                      |    |            |           |            |            |
|------|--------------------------------------|----|------------|-----------|------------|------------|
| Most | Views on hateful content/total views | -7 | -0.0003122 | 0.0004668 | -0.0015318 | 0.0009075  |
| Most | Views on hateful content/total views | -6 | -0.0007468 | 0.0006680 | -0.0024920 | 0.0009984  |
| Most | Views on hateful content/total views | -5 | 0.0007436  | 0.0007577 | -0.0012361 | 0.0027233  |
| Most | Views on hateful content/total views | -4 | -0.0007068 | 0.0004636 | -0.0019180 | 0.0005044  |
| Most | Views on hateful content/total views | -3 | -0.0007347 | 0.0005894 | -0.0022745 | 0.0008052  |
| Most | Views on hateful content/total views | -2 | 0.0004408  | 0.0006584 | -0.0012794 | 0.0021611  |
| Most | Views on hateful content/total views | -1 | 0.0004136  | 0.0004149 | -0.0006703 | 0.0014975  |
| Most | Views on hateful content/total views | 0  | -0.0000703 | 0.0006543 | -0.0017798 | 0.0016392  |
| Most | Views on hateful content/total views | 1  | 0.0004660  | 0.0006291 | -0.0011777 | 0.0021097  |
| Most | Views on hateful content/total views | 2  | 0.0003330  | 0.0002908 | -0.0004269 | 0.0010929  |
| Most | Views on hateful content/total views | 3  | 0.0004502  | 0.0004824 | -0.0008102 | 0.0017107  |
| Most | Views on hateful content/total views | 4  | 0.0002210  | 0.0006175 | -0.0013923 | 0.0018344  |
| Most | Views on hateful content/total views | 5  | -0.0001314 | 0.0007449 | -0.0020775 | 0.0018148  |
| Most | Views on hateful content/total views | 6  | -0.0004226 | 0.0005044 | -0.0017406 | 0.0008953  |
| Most | Views on hateful content/total views | 7  | 0.0006032  | 0.0006221 | -0.0010222 | 0.0022287  |
| Most | Views on hateful content/total views | 8  | 0.0001268  | 0.0007506 | -0.0018344 | 0.0020880  |
| Most | Views on hateful content/total views | 9  | -0.0002250 | 0.0008285 | -0.0023896 | 0.0019396  |
| Most | Views on hateful content/total views | 10 | -0.0003622 | 0.0008541 | -0.0025939 | 0.0018695  |
| Most | Views on hateful content/total views | 11 | 0.0000831  | 0.0013370 | -0.0034100 | 0.0035763  |
| Most | Views on hateful content/total views | 12 | 0.0001635  | 0.0007609 | -0.0018244 | 0.0021515  |
| Most | Views on hateful content/total views | 13 | -0.0005648 | 0.0007821 | -0.0026081 | 0.0014785  |
| Most | Views on hateful content/total views | 14 | -0.0001326 | 0.0010674 | -0.0029215 | 0.0026562  |
| Most | Views on hateful content/total views | 15 | 0.0001432  | 0.0016765 | -0.0042370 | 0.0045235  |
| Most | Views on hateful content/total views | 16 | 0.0001860  | 0.0013980 | -0.0034667 | 0.0038387  |
| Most | Views on hateful content/total views | 17 | -0.0002566 | 0.0021580 | -0.0058950 | 0.0053817  |
| Most | Views on hateful content/total views | 18 | 0.0002970  | 0.0020694 | -0.0051098 | 0.0057038  |
| Most | Views on hateful content/total views | 19 | -0.0001728 | 0.0014721 | -0.0040191 | 0.0036735  |
| Most | Views on hateful content/total views | 20 | -0.0014552 | 0.0011515 | -0.0044637 | 0.0015533  |
| Most | Views on hateful content/total views | 21 | -0.0002014 | 0.0010975 | -0.0030689 | 0.0026662  |
| Most | Views on hateful content/total views | 22 | -0.0005561 | 0.0013279 | -0.0040255 | 0.0029133  |
| Most | Views on hateful content/total views | 23 | -0.0015510 | 0.0013104 | -0.0049748 | 0.0018727  |
| Most | Views on hateful content/total views | 24 | -0.0002862 | 0.0013011 | -0.0036855 | 0.0031131  |
| Most | Views on hateful content/total views | 25 | -0.0008879 | 0.0012309 | -0.0041038 | 0.0023280  |
| Most | Views on hateful content/total views | 26 | -0.0009488 | 0.0012512 | -0.0042179 | 0.0023204  |
| Most | Views on hateful content/total views | 27 | -0.0024109 | 0.0015410 | -0.0064371 | 0.0016153  |
| Most | Views on hateful content/total views | 28 | -0.0020437 | 0.0011888 | -0.0051497 | 0.0010622  |
| Most | Views on hateful content/total views | 29 | -0.0043079 | 0.0019052 | -0.0092858 | 0.0006700  |
| Most | Views on hateful content/total views | 30 | -0.0039307 | 0.0022918 | -0.0099185 | 0.0020570  |
| Most | Views on hateful content/total views | 31 | -0.0058595 | 0.0021478 | -0.0114711 | -0.0002479 |
| Most | Views on hateful content/total views | 32 | -0.0061824 | 0.0016490 | -0.0104908 | -0.0018740 |
| Most | Views on hateful content/total views | 33 | -0.0062474 | 0.0007554 | -0.0082211 | -0.0042736 |

|      |                                      |    |            |           |            |            |
|------|--------------------------------------|----|------------|-----------|------------|------------|
| Most | Views on hateful content/total views | 34 | -0.0048375 | 0.0009460 | -0.0073092 | -0.0023657 |
| Most | Views on hateful content/total views | 35 | -0.0040139 | 0.0014757 | -0.0078696 | -0.0001581 |
| Most | Views on hateful content/total views | 36 | -0.0038012 | 0.0011332 | -0.0067619 | -0.0008406 |
| Most | Views on hateful content/total views | 37 | -0.0044247 | 0.0012151 | -0.0075994 | -0.0012500 |
| Most | Views on hateful content/total views | 38 | -0.0037494 | 0.0010848 | -0.0065836 | -0.0009151 |
| Most | Views on hateful content/total views | 39 | -0.0038697 | 0.0012777 | -0.0072079 | -0.0005314 |
| Most | Views on hateful content/total views | 40 | -0.0043427 | 0.0010952 | -0.0072043 | -0.0014812 |
| Most | Views on hateful content/total views | 41 | -0.0048584 | 0.0018034 | -0.0095701 | -0.0001467 |
| Most | Views on hateful content/total views | 42 | -0.0031728 | 0.0027190 | -0.0102769 | 0.0039312  |
| Most | Views on hateful content/total views | 43 | -0.0077053 | 0.0009281 | -0.0101303 | -0.0052804 |
| Most | Views on hateful content/total views | 44 | -0.0073749 | 0.0018695 | -0.0122595 | -0.0024904 |
| Most | Views on hateful content/total views | 45 | -0.0065283 | 0.0016424 | -0.0108195 | -0.0022371 |
| Most | Views on hateful content/total views | 47 | -0.0082218 | 0.0025728 | -0.0149439 | -0.0014996 |
| Most | Views on hateful content/total views | 48 | -0.0073306 | 0.0017338 | -0.0118606 | -0.0028006 |
| Most | Views on hateful content/total views | 49 | -0.0071176 | 0.0016235 | -0.0113592 | -0.0028759 |
| Most | Views on hateful content/total views | 50 | -0.0074358 | 0.0021701 | -0.0131056 | -0.0017660 |
| Most | Views on hateful content/total views | 51 | -0.0075460 | 0.0019782 | -0.0127144 | -0.0023776 |
| Most | Views on hateful content/total views | 52 | -0.0078103 | 0.0015018 | -0.0117339 | -0.0038866 |
| Most | Views on hateful content/total views | 53 | -0.0072716 | 0.0010986 | -0.0101419 | -0.0044013 |
| Most | Views on hateful content/total views | 54 | -0.0085443 | 0.0024193 | -0.0148653 | -0.0022234 |
| Most | Views on hateful content/total views | 55 | -0.0078698 | 0.0016255 | -0.0121167 | -0.0036229 |
| Most | Views on hateful content/total views | 56 | -0.0067271 | 0.0020609 | -0.0121118 | -0.0013425 |
| Most | Views on hateful content/total views | 57 | -0.0074477 | 0.0013712 | -0.0110303 | -0.0038651 |
| Most | Views on hateful content/total views | 58 | -0.0086765 | 0.0039727 | -0.0190560 | 0.0017030  |
| Most | Views on hateful content/total views | 59 | -0.0076100 | 0.0023219 | -0.0136765 | -0.0015435 |

| sample | outcome                              | event.time | estimate   | std.error | conf.low   | conf.high |
|--------|--------------------------------------|------------|------------|-----------|------------|-----------|
| Middle | Views on hateful content/total views | -44        | 0.0003968  | 0.0002535 | -0.0002342 | 0.0010278 |
| Middle | Views on hateful content/total views | -43        | 0.0000586  | 0.0002981 | -0.0006834 | 0.0008006 |
| Middle | Views on hateful content/total views | -42        | -0.0003584 | 0.0003378 | -0.0011992 | 0.0004823 |
| Middle | Views on hateful content/total views | -41        | -0.0001884 | 0.0002907 | -0.0009119 | 0.0005352 |
| Middle | Views on hateful content/total views | -40        | -0.0003494 | 0.0002304 | -0.0009227 | 0.0002239 |
| Middle | Views on hateful content/total views | -39        | 0.0008733  | 0.0002210 | 0.0003234  | 0.0014232 |
| Middle | Views on hateful content/total views | -38        | -0.0002628 | 0.0002528 | -0.0008920 | 0.0003663 |
| Middle | Views on hateful content/total views | -37        | 0.0004128  | 0.0002191 | -0.0001325 | 0.0009582 |
| Middle | Views on hateful content/total views | -36        | -0.0000459 | 0.0002594 | -0.0006916 | 0.0005998 |
| Middle | Views on hateful content/total views | -35        | -0.0000281 | 0.0004976 | -0.0012665 | 0.0012103 |
| Middle | Views on hateful content/total views | -34        | 0.0017092  | 0.0004468 | 0.0005973  | 0.0028210 |
| Middle | Views on hateful content/total views | -33        | 0.0001305  | 0.0008392 | -0.0019581 | 0.0022190 |
| Middle | Views on hateful content/total views | -32        | 0.0005621  | 0.0004588 | -0.0005798 | 0.0017040 |
| Middle | Views on hateful content/total views | -31        | 0.0004516  | 0.0003234 | -0.0003533 | 0.0012564 |

|        |                                      |     |            |           |            |           |
|--------|--------------------------------------|-----|------------|-----------|------------|-----------|
| Middle | Views on hateful content/total views | -30 | 0.0008165  | 0.0006278 | -0.0007458 | 0.0023788 |
| Middle | Views on hateful content/total views | -29 | -0.0006988 | 0.0005314 | -0.0020213 | 0.0006237 |
| Middle | Views on hateful content/total views | -28 | -0.0004615 | 0.0002327 | -0.0010407 | 0.0001177 |
| Middle | Views on hateful content/total views | -27 | -0.0001045 | 0.0005527 | -0.0014800 | 0.0012709 |
| Middle | Views on hateful content/total views | -26 | -0.0001676 | 0.0011134 | -0.0029385 | 0.0026033 |
| Middle | Views on hateful content/total views | -25 | 0.0005239  | 0.0003779 | -0.0004166 | 0.0014645 |
| Middle | Views on hateful content/total views | -24 | -0.0007224 | 0.0003905 | -0.0016943 | 0.0002495 |
| Middle | Views on hateful content/total views | -23 | 0.0001134  | 0.0003777 | -0.0008264 | 0.0010533 |
| Middle | Views on hateful content/total views | -22 | -0.0002101 | 0.0002817 | -0.0009111 | 0.0004908 |
| Middle | Views on hateful content/total views | -21 | 0.0004950  | 0.0003591 | -0.0003987 | 0.0013886 |
| Middle | Views on hateful content/total views | -20 | 0.0001508  | 0.0003677 | -0.0007643 | 0.0010659 |
| Middle | Views on hateful content/total views | -19 | 0.0004292  | 0.0009850 | -0.0020221 | 0.0028805 |
| Middle | Views on hateful content/total views | -18 | 0.0005497  | 0.0004749 | -0.0006323 | 0.0017316 |
| Middle | Views on hateful content/total views | -17 | -0.0001899 | 0.0002832 | -0.0008946 | 0.0005148 |
| Middle | Views on hateful content/total views | -16 | 0.0002144  | 0.0004253 | -0.0008441 | 0.0012729 |
| Middle | Views on hateful content/total views | -15 | 0.0001156  | 0.0004819 | -0.0010838 | 0.0013149 |
| Middle | Views on hateful content/total views | -14 | 0.0001995  | 0.0008798 | -0.0019901 | 0.0023891 |
| Middle | Views on hateful content/total views | -13 | 0.0003920  | 0.0008219 | -0.0016534 | 0.0024374 |
| Middle | Views on hateful content/total views | -12 | -0.0008379 | 0.0014891 | -0.0045438 | 0.0028681 |
| Middle | Views on hateful content/total views | -11 | 0.0000453  | 0.0014774 | -0.0036314 | 0.0037220 |
| Middle | Views on hateful content/total views | -10 | -0.0001575 | 0.0011612 | -0.0030471 | 0.0027322 |
| Middle | Views on hateful content/total views | -9  | -0.0003660 | 0.0012204 | -0.0034032 | 0.0026713 |
| Middle | Views on hateful content/total views | -8  | 0.0003808  | 0.0007570 | -0.0015032 | 0.0022647 |
| Middle | Views on hateful content/total views | -7  | -0.0000765 | 0.0007032 | -0.0018264 | 0.0016734 |
| Middle | Views on hateful content/total views | -6  | -0.0009002 | 0.0010695 | -0.0035618 | 0.0017615 |
| Middle | Views on hateful content/total views | -5  | 0.0000230  | 0.0012078 | -0.0029829 | 0.0030288 |
| Middle | Views on hateful content/total views | -4  | -0.0004696 | 0.0004903 | -0.0016897 | 0.0007505 |
| Middle | Views on hateful content/total views | -3  | -0.0001885 | 0.0008358 | -0.0022685 | 0.0018915 |
| Middle | Views on hateful content/total views | -2  | 0.0000565  | 0.0010014 | -0.0024358 | 0.0025487 |
| Middle | Views on hateful content/total views | -1  | 0.0003481  | 0.0004924 | -0.0008773 | 0.0015736 |
| Middle | Views on hateful content/total views | 0   | 0.0002467  | 0.0010899 | -0.0024658 | 0.0029592 |
| Middle | Views on hateful content/total views | 1   | 0.0006259  | 0.0008540 | -0.0014993 | 0.0027512 |
| Middle | Views on hateful content/total views | 2   | 0.0006680  | 0.0005687 | -0.0007473 | 0.0020833 |
| Middle | Views on hateful content/total views | 3   | 0.0007540  | 0.0008895 | -0.0014596 | 0.0029675 |
| Middle | Views on hateful content/total views | 4   | 0.0006942  | 0.0009573 | -0.0016883 | 0.0030767 |
| Middle | Views on hateful content/total views | 5   | 0.0004885  | 0.0011920 | -0.0024779 | 0.0034550 |
| Middle | Views on hateful content/total views | 6   | 0.0005954  | 0.0009196 | -0.0016932 | 0.0028841 |
| Middle | Views on hateful content/total views | 7   | 0.0010210  | 0.0009506 | -0.0013446 | 0.0033866 |
| Middle | Views on hateful content/total views | 8   | 0.0006527  | 0.0012705 | -0.0025092 | 0.0038146 |
| Middle | Views on hateful content/total views | 9   | 0.0001086  | 0.0014102 | -0.0034010 | 0.0036182 |
| Middle | Views on hateful content/total views | 10  | 0.0002443  | 0.0011776 | -0.0026863 | 0.0031750 |



|        |                                      |    |            |           |            |            |
|--------|--------------------------------------|----|------------|-----------|------------|------------|
| Middle | Views on hateful content/total views | 11 | 0.0003198  | 0.0020053 | -0.0046707 | 0.0053102  |
| Middle | Views on hateful content/total views | 12 | 0.0007577  | 0.0011351 | -0.0020671 | 0.0035824  |
| Middle | Views on hateful content/total views | 13 | 0.0001945  | 0.0014820 | -0.0034937 | 0.0038827  |
| Middle | Views on hateful content/total views | 14 | 0.0001565  | 0.0015202 | -0.0036269 | 0.0039398  |
| Middle | Views on hateful content/total views | 15 | 0.0011065  | 0.0022355 | -0.0044570 | 0.0066699  |
| Middle | Views on hateful content/total views | 16 | 0.0012052  | 0.0020022 | -0.0037775 | 0.0061880  |
| Middle | Views on hateful content/total views | 17 | 0.0007305  | 0.0027205 | -0.0060400 | 0.0075010  |
| Middle | Views on hateful content/total views | 18 | 0.0013817  | 0.0030056 | -0.0060981 | 0.0088615  |
| Middle | Views on hateful content/total views | 19 | 0.0009429  | 0.0024196 | -0.0050787 | 0.0069645  |
| Middle | Views on hateful content/total views | 20 | -0.0006255 | 0.0015855 | -0.0045714 | 0.0033203  |
| Middle | Views on hateful content/total views | 21 | 0.0003299  | 0.0015561 | -0.0035428 | 0.0042025  |
| Middle | Views on hateful content/total views | 22 | 0.0001478  | 0.0020684 | -0.0049997 | 0.0052954  |
| Middle | Views on hateful content/total views | 23 | -0.0004394 | 0.0017753 | -0.0048574 | 0.0039786  |
| Middle | Views on hateful content/total views | 24 | 0.0000557  | 0.0018247 | -0.0044852 | 0.0045966  |
| Middle | Views on hateful content/total views | 25 | -0.0001876 | 0.0018371 | -0.0047595 | 0.0043842  |
| Middle | Views on hateful content/total views | 26 | -0.0001792 | 0.0017225 | -0.0044660 | 0.0041076  |
| Middle | Views on hateful content/total views | 27 | -0.0024710 | 0.0024439 | -0.0085528 | 0.0036109  |
| Middle | Views on hateful content/total views | 28 | -0.0019341 | 0.0019921 | -0.0068916 | 0.0030235  |
| Middle | Views on hateful content/total views | 29 | -0.0036331 | 0.0019967 | -0.0086022 | 0.0013360  |
| Middle | Views on hateful content/total views | 30 | -0.0035127 | 0.0027104 | -0.0102578 | 0.0032323  |
| Middle | Views on hateful content/total views | 31 | -0.0048021 | 0.0037072 | -0.0140279 | 0.0044237  |
| Middle | Views on hateful content/total views | 32 | -0.0045918 | 0.0025707 | -0.0109893 | 0.0018057  |
| Middle | Views on hateful content/total views | 33 | -0.0050524 | 0.0016428 | -0.0091407 | -0.0009642 |
| Middle | Views on hateful content/total views | 34 | -0.0039171 | 0.0013667 | -0.0073182 | -0.0005160 |
| Middle | Views on hateful content/total views | 35 | -0.0032951 | 0.0020971 | -0.0085142 | 0.0019239  |
| Middle | Views on hateful content/total views | 36 | -0.0031920 | 0.0015129 | -0.0069571 | 0.0005731  |
| Middle | Views on hateful content/total views | 37 | -0.0038391 | 0.0018091 | -0.0083414 | 0.0006632  |
| Middle | Views on hateful content/total views | 38 | -0.0035474 | 0.0016296 | -0.0076028 | 0.0005080  |
| Middle | Views on hateful content/total views | 39 | -0.0035138 | 0.0020091 | -0.0085138 | 0.0014862  |
| Middle | Views on hateful content/total views | 40 | -0.0040963 | 0.0017428 | -0.0084335 | 0.0002409  |
| Middle | Views on hateful content/total views | 41 | -0.0040861 | 0.0022930 | -0.0097925 | 0.0016202  |
| Middle | Views on hateful content/total views | 42 | -0.0028619 | 0.0042186 | -0.0133605 | 0.0076367  |
| Middle | Views on hateful content/total views | 43 | -0.0068438 | 0.0020837 | -0.0120294 | -0.0016582 |
| Middle | Views on hateful content/total views | 44 | -0.0071273 | 0.0022078 | -0.0126217 | -0.0016329 |
| Middle | Views on hateful content/total views | 45 | -0.0056548 | 0.0030289 | -0.0131928 | 0.0018831  |
| Middle | Views on hateful content/total views | 47 | -0.0056575 | 0.0047078 | -0.0173736 | 0.0060586  |
| Middle | Views on hateful content/total views | 48 | -0.0052618 | 0.0029832 | -0.0126859 | 0.0021622  |
| Middle | Views on hateful content/total views | 49 | -0.0047767 | 0.0028231 | -0.0118024 | 0.0022490  |
| Middle | Views on hateful content/total views | 50 | -0.0052005 | 0.0037736 | -0.0145917 | 0.0041907  |
| Middle | Views on hateful content/total views | 51 | -0.0051430 | 0.0029465 | -0.0124758 | 0.0021898  |
| Middle | Views on hateful content/total views | 52 | -0.0050904 | 0.0028297 | -0.0121324 | 0.0019516  |

|        |                                      |    |            |           |            |            |
|--------|--------------------------------------|----|------------|-----------|------------|------------|
| Middle | Views on hateful content/total views | 53 | -0.0054387 | 0.0020803 | -0.0106158 | -0.0002617 |
| Middle | Views on hateful content/total views | 54 | -0.0064163 | 0.0052038 | -0.0193667 | 0.0065341  |
| Middle | Views on hateful content/total views | 55 | -0.0052175 | 0.0028721 | -0.0123652 | 0.0019302  |
| Middle | Views on hateful content/total views | 56 | -0.0072150 | 0.0039012 | -0.0169237 | 0.0024936  |
| Middle | Views on hateful content/total views | 57 | -0.0074431 | 0.0044778 | -0.0185868 | 0.0037005  |
| Middle | Views on hateful content/total views | 58 | -0.0075724 | 0.0067755 | -0.0244342 | 0.0092893  |
| Middle | Views on hateful content/total views | 59 | -0.0071525 | 0.0038556 | -0.0167477 | 0.0024426  |

| sample | outcome                              | event.time | estimate   | std.error | conf.low   | conf.high  |
|--------|--------------------------------------|------------|------------|-----------|------------|------------|
| Least  | Views on hateful content/total views | -44        | 0.0003872  | 0.0002681 | -0.0003108 | 0.0010853  |
| Least  | Views on hateful content/total views | -43        | 0.0001377  | 0.0002766 | -0.0005825 | 0.0008578  |
| Least  | Views on hateful content/total views | -42        | -0.0000115 | 0.0003316 | -0.0008747 | 0.0008518  |
| Least  | Views on hateful content/total views | -41        | 0.0000508  | 0.0002712 | -0.0006553 | 0.0007568  |
| Least  | Views on hateful content/total views | -40        | -0.0008281 | 0.0002149 | -0.0013875 | -0.0002686 |
| Least  | Views on hateful content/total views | -39        | 0.0009310  | 0.0002007 | 0.0004083  | 0.0014537  |
| Least  | Views on hateful content/total views | -38        | -0.0000782 | 0.0002062 | -0.0006150 | 0.0004587  |
| Least  | Views on hateful content/total views | -37        | 0.0004594  | 0.0002367 | -0.0001570 | 0.0010758  |
| Least  | Views on hateful content/total views | -36        | -0.0004165 | 0.0003271 | -0.0012680 | 0.0004350  |
| Least  | Views on hateful content/total views | -35        | 0.0002520  | 0.0005541 | -0.0011907 | 0.0016947  |
| Least  | Views on hateful content/total views | -34        | 0.0006869  | 0.0005973 | -0.0008682 | 0.0022420  |
| Least  | Views on hateful content/total views | -33        | 0.0008255  | 0.0008407 | -0.0013634 | 0.0030144  |
| Least  | Views on hateful content/total views | -32        | 0.0004078  | 0.0006282 | -0.0012279 | 0.0020436  |
| Least  | Views on hateful content/total views | -31        | 0.0005634  | 0.0004515 | -0.0006121 | 0.0017389  |
| Least  | Views on hateful content/total views | -30        | 0.0000332  | 0.0006533 | -0.0016679 | 0.0017342  |
| Least  | Views on hateful content/total views | -29        | -0.0003033 | 0.0005346 | -0.0016952 | 0.0010885  |
| Least  | Views on hateful content/total views | -28        | 0.0003807  | 0.0002824 | -0.0003545 | 0.0011159  |
| Least  | Views on hateful content/total views | -27        | -0.0001187 | 0.0007311 | -0.0020223 | 0.0017849  |
| Least  | Views on hateful content/total views | -26        | -0.0006940 | 0.0012046 | -0.0038303 | 0.0024422  |
| Least  | Views on hateful content/total views | -25        | 0.0001824  | 0.0004011 | -0.0008619 | 0.0012266  |
| Least  | Views on hateful content/total views | -24        | -0.0002758 | 0.0003883 | -0.0012867 | 0.0007351  |
| Least  | Views on hateful content/total views | -23        | 0.0003459  | 0.0003289 | -0.0005105 | 0.0012024  |
| Least  | Views on hateful content/total views | -22        | -0.0002901 | 0.0003184 | -0.0011191 | 0.0005389  |
| Least  | Views on hateful content/total views | -21        | 0.0000602  | 0.0004912 | -0.0012188 | 0.0013391  |
| Least  | Views on hateful content/total views | -20        | 0.0007555  | 0.0005171 | -0.0005908 | 0.0021019  |
| Least  | Views on hateful content/total views | -19        | 0.0007756  | 0.0012017 | -0.0023532 | 0.0039045  |
| Least  | Views on hateful content/total views | -18        | 0.0000355  | 0.0004776 | -0.0012081 | 0.0012791  |
| Least  | Views on hateful content/total views | -17        | -0.0001211 | 0.0003952 | -0.0011500 | 0.0009078  |
| Least  | Views on hateful content/total views | -16        | 0.0010608  | 0.0005505 | -0.0003724 | 0.0024940  |
| Least  | Views on hateful content/total views | -15        | -0.0005773 | 0.0003541 | -0.0014993 | 0.0003448  |
| Least  | Views on hateful content/total views | -14        | 0.0001345  | 0.0007751 | -0.0018834 | 0.0021525  |
| Least  | Views on hateful content/total views | -13        | 0.0004336  | 0.0007639 | -0.0015553 | 0.0024224  |

|       |                                      |     |            |           |            |           |
|-------|--------------------------------------|-----|------------|-----------|------------|-----------|
| Least | Views on hateful content/total views | -12 | -0.0005265 | 0.0011534 | -0.0035295 | 0.0024764 |
| Least | Views on hateful content/total views | -11 | -0.0002974 | 0.0012672 | -0.0035969 | 0.0030021 |
| Least | Views on hateful content/total views | -10 | -0.0002799 | 0.0009164 | -0.0026660 | 0.0021061 |
| Least | Views on hateful content/total views | -9  | -0.0004022 | 0.0009774 | -0.0029470 | 0.0021425 |
| Least | Views on hateful content/total views | -8  | 0.0001632  | 0.0006436 | -0.0015126 | 0.0018390 |
| Least | Views on hateful content/total views | -7  | 0.0004969  | 0.0005201 | -0.0008571 | 0.0018510 |
| Least | Views on hateful content/total views | -6  | -0.0011257 | 0.0009664 | -0.0036419 | 0.0013906 |
| Least | Views on hateful content/total views | -5  | 0.0001127  | 0.0010085 | -0.0025130 | 0.0027385 |
| Least | Views on hateful content/total views | -4  | -0.0005213 | 0.0004264 | -0.0016316 | 0.0005889 |
| Least | Views on hateful content/total views | -3  | -0.0002953 | 0.0008159 | -0.0024197 | 0.0018291 |
| Least | Views on hateful content/total views | -2  | -0.0000231 | 0.0009107 | -0.0023941 | 0.0023480 |
| Least | Views on hateful content/total views | -1  | 0.0003946  | 0.0004809 | -0.0008575 | 0.0016468 |
| Least | Views on hateful content/total views | 0   | -0.0003282 | 0.0009118 | -0.0027022 | 0.0020458 |
| Least | Views on hateful content/total views | 1   | 0.0002875  | 0.0008786 | -0.0020001 | 0.0025752 |
| Least | Views on hateful content/total views | 2   | 0.0000953  | 0.0006144 | -0.0015043 | 0.0016949 |
| Least | Views on hateful content/total views | 3   | 0.0004818  | 0.0008247 | -0.0016656 | 0.0026291 |
| Least | Views on hateful content/total views | 4   | 0.0001090  | 0.0008983 | -0.0022298 | 0.0024478 |
| Least | Views on hateful content/total views | 5   | -0.0000305 | 0.0010615 | -0.0027943 | 0.0027333 |
| Least | Views on hateful content/total views | 6   | 0.0003039  | 0.0008956 | -0.0020279 | 0.0026357 |
| Least | Views on hateful content/total views | 7   | 0.0010332  | 0.0010228 | -0.0016297 | 0.0036961 |
| Least | Views on hateful content/total views | 8   | 0.0002312  | 0.0011718 | -0.0028199 | 0.0032823 |
| Least | Views on hateful content/total views | 9   | -0.0001476 | 0.0012036 | -0.0032815 | 0.0029863 |
| Least | Views on hateful content/total views | 10  | -0.0001348 | 0.0012897 | -0.0034928 | 0.0032233 |
| Least | Views on hateful content/total views | 11  | -0.0001905 | 0.0019823 | -0.0053516 | 0.0049706 |
| Least | Views on hateful content/total views | 12  | -0.0001927 | 0.0011912 | -0.0032941 | 0.0029087 |
| Least | Views on hateful content/total views | 13  | -0.0007643 | 0.0012575 | -0.0040383 | 0.0025097 |
| Least | Views on hateful content/total views | 14  | -0.0004297 | 0.0013540 | -0.0039550 | 0.0030955 |
| Least | Views on hateful content/total views | 15  | 0.0005504  | 0.0021148 | -0.0049557 | 0.0060566 |
| Least | Views on hateful content/total views | 16  | 0.0004753  | 0.0021377 | -0.0050906 | 0.0060412 |
| Least | Views on hateful content/total views | 17  | 0.0004006  | 0.0024664 | -0.0060209 | 0.0068222 |
| Least | Views on hateful content/total views | 18  | 0.0004092  | 0.0026801 | -0.0065688 | 0.0073872 |
| Least | Views on hateful content/total views | 19  | 0.0005302  | 0.0019405 | -0.0045222 | 0.0055826 |
| Least | Views on hateful content/total views | 20  | -0.0013379 | 0.0013890 | -0.0049543 | 0.0022785 |
| Least | Views on hateful content/total views | 21  | -0.0001622 | 0.0013253 | -0.0036128 | 0.0032884 |
| Least | Views on hateful content/total views | 22  | -0.0003215 | 0.0015846 | -0.0044473 | 0.0038042 |
| Least | Views on hateful content/total views | 23  | -0.0010752 | 0.0016408 | -0.0053473 | 0.0031969 |
| Least | Views on hateful content/total views | 24  | -0.0006096 | 0.0015539 | -0.0046554 | 0.0034362 |
| Least | Views on hateful content/total views | 25  | -0.0011946 | 0.0014266 | -0.0049088 | 0.0025197 |
| Least | Views on hateful content/total views | 26  | -0.0010562 | 0.0013944 | -0.0046868 | 0.0025743 |
| Least | Views on hateful content/total views | 27  | -0.0031581 | 0.0018465 | -0.0079658 | 0.0016496 |
| Least | Views on hateful content/total views | 28  | -0.0028663 | 0.0015528 | -0.0069093 | 0.0011767 |

|       |                                      |    |            |           |            |            |
|-------|--------------------------------------|----|------------|-----------|------------|------------|
| Least | Views on hateful content/total views | 29 | -0.0049114 | 0.0012329 | -0.0081214 | -0.0017013 |
| Least | Views on hateful content/total views | 30 | -0.0048594 | 0.0021254 | -0.0103933 | 0.0006744  |
| Least | Views on hateful content/total views | 31 | -0.0058766 | 0.0033153 | -0.0145083 | 0.0027552  |
| Least | Views on hateful content/total views | 32 | -0.0057651 | 0.0020868 | -0.0111984 | -0.0003318 |
| Least | Views on hateful content/total views | 33 | -0.0054360 | 0.0013463 | -0.0089412 | -0.0019307 |
| Least | Views on hateful content/total views | 34 | -0.0042977 | 0.0011741 | -0.0073546 | -0.0012409 |
| Least | Views on hateful content/total views | 35 | -0.0039475 | 0.0018921 | -0.0088739 | 0.0009790  |
| Least | Views on hateful content/total views | 36 | -0.0041594 | 0.0016452 | -0.0084429 | 0.0001241  |
| Least | Views on hateful content/total views | 37 | -0.0049918 | 0.0016966 | -0.0094091 | -0.0005745 |
| Least | Views on hateful content/total views | 38 | -0.0040722 | 0.0014723 | -0.0079055 | -0.0002390 |
| Least | Views on hateful content/total views | 39 | -0.0043244 | 0.0016178 | -0.0085366 | -0.0001122 |
| Least | Views on hateful content/total views | 40 | -0.0045202 | 0.0016668 | -0.0088600 | -0.0001804 |
| Least | Views on hateful content/total views | 41 | -0.0048405 | 0.0017151 | -0.0093061 | -0.0003749 |
| Least | Views on hateful content/total views | 42 | -0.0034006 | 0.0039453 | -0.0136726 | 0.0068715  |
| Least | Views on hateful content/total views | 43 | -0.0089176 | 0.0024062 | -0.0151825 | -0.0026528 |
| Least | Views on hateful content/total views | 44 | -0.0088348 | 0.0014878 | -0.0127085 | -0.0049610 |
| Least | Views on hateful content/total views | 45 | -0.0075514 | 0.0024492 | -0.0139281 | -0.0011747 |
| Least | Views on hateful content/total views | 47 | -0.0068123 | 0.0036330 | -0.0162713 | 0.0026466  |
| Least | Views on hateful content/total views | 48 | -0.0058028 | 0.0022855 | -0.0117533 | 0.0001477  |
| Least | Views on hateful content/total views | 49 | -0.0052830 | 0.0022078 | -0.0110313 | 0.0004653  |
| Least | Views on hateful content/total views | 50 | -0.0065680 | 0.0028605 | -0.0140157 | 0.0008797  |
| Least | Views on hateful content/total views | 51 | -0.0058974 | 0.0025039 | -0.0124167 | 0.0006219  |
| Least | Views on hateful content/total views | 52 | -0.0060239 | 0.0022238 | -0.0118138 | -0.0002340 |
| Least | Views on hateful content/total views | 53 | -0.0066883 | 0.0017138 | -0.0111505 | -0.0022260 |
| Least | Views on hateful content/total views | 54 | -0.0077052 | 0.0038792 | -0.0178053 | 0.0023949  |
| Least | Views on hateful content/total views | 55 | -0.0059697 | 0.0024904 | -0.0124539 | 0.0005145  |
| Least | Views on hateful content/total views | 56 | -0.0087377 | 0.0027352 | -0.0158591 | -0.0016164 |
| Least | Views on hateful content/total views | 57 | -0.0090093 | 0.0018800 | -0.0139042 | -0.0041144 |
| Least | Views on hateful content/total views | 58 | -0.0101533 | 0.0053321 | -0.0240362 | 0.0037297  |
| Least | Views on hateful content/total views | 59 | -0.0088470 | 0.0026480 | -0.0157414 | -0.0019525 |

Views on non...organization content that is hateful  
Average effect by length of exposure (Callaway and Sant'Anna)

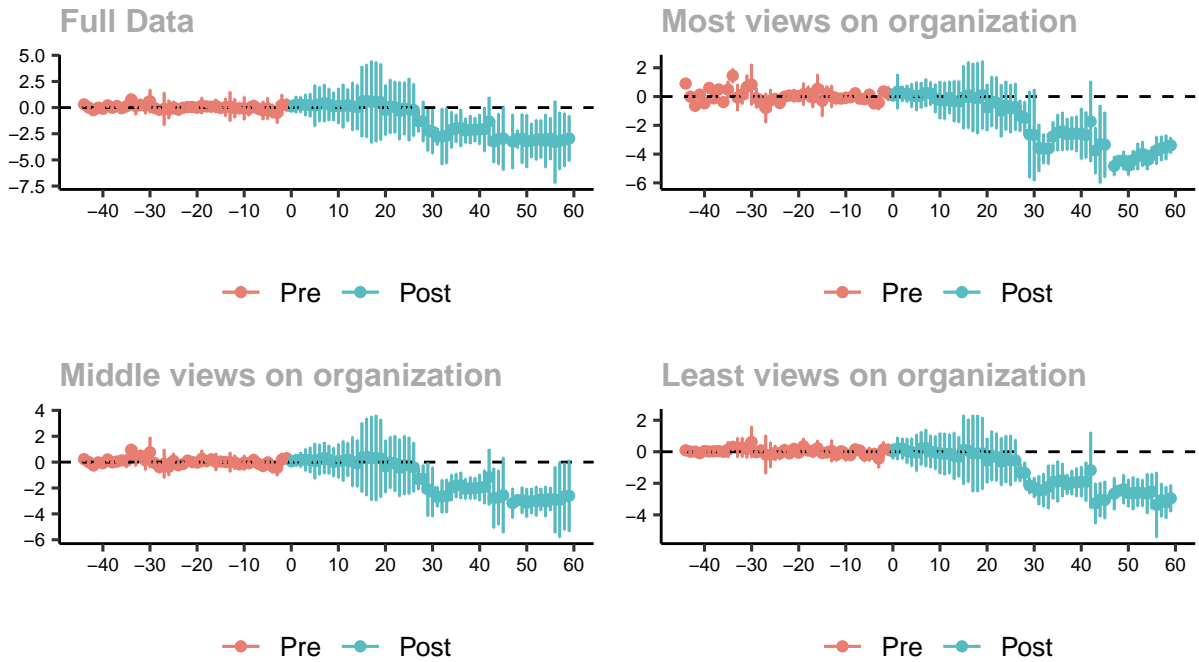

Long timeframe with sampled control groups

| sample | outcome                                          | event.time | estimate   | std.error | conf.low   | conf.high  |
|--------|--------------------------------------------------|------------|------------|-----------|------------|------------|
| Full   | Views on nonorganization content that is hateful | -44        | 0.3049943  | 0.0944609 | 0.0614106  | 0.5485779  |
| Full   | Views on nonorganization content that is hateful | -43        | 0.0000492  | 0.0434559 | -0.1120093 | 0.1121078  |
| Full   | Views on nonorganization content that is hateful | -42        | -0.2447495 | 0.0513552 | -0.3771777 | -0.1123213 |
| Full   | Views on nonorganization content that is hateful | -41        | -0.0101672 | 0.0547488 | -0.1513464 | 0.1310119  |
| Full   | Views on nonorganization content that is hateful | -40        | -0.1127269 | 0.0760267 | -0.3087749 | 0.0833211  |
| Full   | Views on nonorganization content that is hateful | -39        | 0.2127826  | 0.0935392 | -0.0284243 | 0.4539894  |
| Full   | Views on nonorganization content that is hateful | -38        | -0.0175684 | 0.0683602 | -0.1938468 | 0.1587100  |
| Full   | Views on nonorganization content that is hateful | -37        | 0.1489747  | 0.0396944 | 0.0466159  | 0.2513335  |
| Full   | Views on nonorganization content that is hateful | -36        | -0.0553597 | 0.0880132 | -0.2823167 | 0.1715973  |
| Full   | Views on nonorganization content that is hateful | -35        | 0.1316237  | 0.2179460 | -0.4303873 | 0.6936348  |
| Full   | Views on nonorganization content that is hateful | -34        | 0.7831011  | 0.1217539 | 0.4691378  | 1.0970643  |
| Full   | Views on nonorganization content that is hateful | -33        | 0.1367278  | 0.3265131 | -0.7052423 | 0.9786979  |
| Full   | Views on nonorganization content that is hateful | -32        | 0.2642559  | 0.2173873 | -0.2963146 | 0.8248264  |
| Full   | Views on nonorganization content that is hateful | -31        | 0.1706719  | 0.3076104 | -0.6225543 | 0.9638982  |
| Full   | Views on nonorganization content that is hateful | -30        | 0.6085684  | 0.4341927 | -0.5110721 | 1.7282088  |
| Full   | Views on nonorganization content that is hateful | -29        | -0.0442637 | 0.1436279 | -0.4146328 | 0.3261054  |
| Full   | Views on nonorganization content that is hateful | -28        | -0.2130210 | 0.1105577 | -0.4981131 | 0.0720711  |
| Full   | Views on nonorganization content that is hateful | -27        | -0.1274677 | 0.6078701 | -1.6949652 | 1.4400298  |
| Full   | Views on nonorganization content that is hateful | -26        | -0.1791103 | 0.3511394 | -1.0845834 | 0.7263628  |

|      |                                                  |     |            |           |            |           |
|------|--------------------------------------------------|-----|------------|-----------|------------|-----------|
| Full | Views on nonorganization content that is hateful | -25 | 0.0199371  | 0.2331908 | -0.5813853 | 0.6212595 |
| Full | Views on nonorganization content that is hateful | -24 | -0.2030403 | 0.1571679 | -0.6083248 | 0.2022442 |
| Full | Views on nonorganization content that is hateful | -23 | -0.0206124 | 0.1004252 | -0.2795759 | 0.2383512 |
| Full | Views on nonorganization content that is hateful | -22 | 0.0484472  | 0.0707565 | -0.1340106 | 0.2309051 |
| Full | Views on nonorganization content that is hateful | -21 | 0.0581422  | 0.0864382 | -0.1647535 | 0.2810379 |
| Full | Views on nonorganization content that is hateful | -20 | -0.0130278 | 0.0911712 | -0.2481283 | 0.2220728 |
| Full | Views on nonorganization content that is hateful | -19 | 0.1769232  | 0.3042747 | -0.6077013 | 0.9615478 |
| Full | Views on nonorganization content that is hateful | -18 | 0.1089728  | 0.0667699 | -0.0632049 | 0.2811506 |
| Full | Views on nonorganization content that is hateful | -17 | 0.0843771  | 0.1530663 | -0.3103308 | 0.4790849 |
| Full | Views on nonorganization content that is hateful | -16 | 0.1528727  | 0.2547448 | -0.5040305 | 0.8097759 |
| Full | Views on nonorganization content that is hateful | -15 | -0.0422316 | 0.1552600 | -0.4425961 | 0.3581329 |
| Full | Views on nonorganization content that is hateful | -14 | 0.0349643  | 0.3400182 | -0.8418309 | 0.9117596 |
| Full | Views on nonorganization content that is hateful | -13 | 0.1023261  | 0.5484787 | -1.3120203 | 1.5166725 |
| Full | Views on nonorganization content that is hateful | -12 | -0.0688643 | 0.3560039 | -0.9868815 | 0.8491529 |
| Full | Views on nonorganization content that is hateful | -11 | -0.0681430 | 0.1991430 | -0.5816674 | 0.4453813 |
| Full | Views on nonorganization content that is hateful | -10 | -0.0778151 | 0.4332934 | -1.1951364 | 1.0395062 |
| Full | Views on nonorganization content that is hateful | -9  | -0.1246665 | 0.2641382 | -0.8057923 | 0.5564592 |
| Full | Views on nonorganization content that is hateful | -8  | 0.1598385  | 0.2215740 | -0.4115281 | 0.7312051 |
| Full | Views on nonorganization content that is hateful | -7  | -0.1037414 | 0.2059056 | -0.6347044 | 0.4272216 |
| Full | Views on nonorganization content that is hateful | -6  | -0.2723072 | 0.3480065 | -1.1697017 | 0.6250872 |
| Full | Views on nonorganization content that is hateful | -5  | -0.0861382 | 0.4027046 | -1.1245812 | 0.9523048 |
| Full | Views on nonorganization content that is hateful | -4  | -0.3421069 | 0.2561159 | -1.0025459 | 0.3183320 |
| Full | Views on nonorganization content that is hateful | -3  | -0.5039304 | 0.3908378 | -1.5117727 | 0.5039119 |
| Full | Views on nonorganization content that is hateful | -2  | 0.2449653  | 0.3908460 | -0.7628982 | 1.2528288 |
| Full | Views on nonorganization content that is hateful | -1  | 0.2439827  | 0.2348011 | -0.3614923 | 0.8494576 |
| Full | Views on nonorganization content that is hateful | 0   | 0.1107680  | 0.2038931 | -0.4150053 | 0.6365412 |
| Full | Views on nonorganization content that is hateful | 1   | 0.2849938  | 0.3079697 | -0.5091589 | 1.0791465 |
| Full | Views on nonorganization content that is hateful | 2   | 0.2838190  | 0.2956499 | -0.4785649 | 1.0462029 |
| Full | Views on nonorganization content that is hateful | 3   | 0.2524511  | 0.4052336 | -0.7925133 | 1.2974154 |
| Full | Views on nonorganization content that is hateful | 4   | 0.2181117  | 0.4363407 | -0.9070677 | 1.3432911 |
| Full | Views on nonorganization content that is hateful | 5   | 0.1851456  | 0.7717918 | -1.8050519 | 2.1753432 |
| Full | Views on nonorganization content that is hateful | 6   | 0.3273691  | 0.6456313 | -1.3375020 | 1.9922403 |
| Full | Views on nonorganization content that is hateful | 7   | 0.4322736  | 0.6922110 | -1.3527112 | 2.2172584 |
| Full | Views on nonorganization content that is hateful | 8   | 0.2750661  | 0.6018709 | -1.2769612 | 1.8270933 |
| Full | Views on nonorganization content that is hateful | 9   | 0.1146686  | 0.5343398 | -1.2632183 | 1.4925554 |
| Full | Views on nonorganization content that is hateful | 10  | 0.1563981  | 0.6576292 | -1.5394116 | 1.8522079 |
| Full | Views on nonorganization content that is hateful | 11  | 0.1373836  | 0.8134958 | -1.9603550 | 2.2351222 |
| Full | Views on nonorganization content that is hateful | 12  | 0.2333098  | 0.6082763 | -1.3352350 | 1.8018546 |
| Full | Views on nonorganization content that is hateful | 13  | 0.1147994  | 0.8952398 | -2.1937300 | 2.4233288 |
| Full | Views on nonorganization content that is hateful | 14  | 0.0242060  | 0.8398286 | -2.1414361 | 2.1898481 |
| Full | Views on nonorganization content that is hateful | 15  | 0.5759987  | 1.3116874 | -2.8064123 | 3.9584097 |

|      |                                                  |    |            |           |            |            |
|------|--------------------------------------------------|----|------------|-----------|------------|------------|
| Full | Views on nonorganization content that is hateful | 16 | 0.6348119  | 1.3537575 | -2.8560841 | 4.1257079  |
| Full | Views on nonorganization content that is hateful | 17 | 0.5293357  | 1.5262126 | -3.4062653 | 4.4649368  |
| Full | Views on nonorganization content that is hateful | 18 | 0.5443913  | 1.4864509 | -3.2886775 | 4.3774601  |
| Full | Views on nonorganization content that is hateful | 19 | 0.5345232  | 1.4181236 | -3.1223517 | 4.1913982  |
| Full | Views on nonorganization content that is hateful | 20 | -0.2368533 | 0.9369428 | -2.6529212 | 2.1792146  |
| Full | Views on nonorganization content that is hateful | 21 | 0.1050453  | 1.0012324 | -2.4768042 | 2.6868948  |
| Full | Views on nonorganization content that is hateful | 22 | 0.0362168  | 0.9604159 | -2.4403803 | 2.5128138  |
| Full | Views on nonorganization content that is hateful | 23 | -0.3104692 | 1.0800321 | -3.0955172 | 2.4745788  |
| Full | Views on nonorganization content that is hateful | 24 | -0.0856356 | 0.9858516 | -2.6278230 | 2.4565518  |
| Full | Views on nonorganization content that is hateful | 25 | -0.1864081 | 1.1644258 | -3.1890797 | 2.8162635  |
| Full | Views on nonorganization content that is hateful | 26 | -0.2316377 | 0.9762439 | -2.7490501 | 2.2857746  |
| Full | Views on nonorganization content that is hateful | 27 | -1.2901971 | 0.4109907 | -2.3500071 | -0.2303870 |
| Full | Views on nonorganization content that is hateful | 28 | -1.3223497 | 0.7500078 | -3.2563735 | 0.6116742  |
| Full | Views on nonorganization content that is hateful | 29 | -2.1585921 | 0.7808503 | -4.1721485 | -0.1450356 |
| Full | Views on nonorganization content that is hateful | 30 | -2.3145798 | 0.8263468 | -4.4454568 | -0.1837027 |
| Full | Views on nonorganization content that is hateful | 31 | -2.7736980 | 0.3216843 | -3.6032162 | -1.9441797 |
| Full | Views on nonorganization content that is hateful | 32 | -2.7670436 | 1.0408450 | -5.4510411 | -0.0830460 |
| Full | Views on nonorganization content that is hateful | 33 | -2.6807237 | 1.0322857 | -5.3426496 | -0.0187978 |
| Full | Views on nonorganization content that is hateful | 34 | -2.1281827 | 0.6770458 | -3.8740615 | -0.3823040 |
| Full | Views on nonorganization content that is hateful | 35 | -1.9952394 | 0.5209196 | -3.3385200 | -0.6519589 |
| Full | Views on nonorganization content that is hateful | 36 | -1.9349638 | 0.6946635 | -3.7262728 | -0.1436548 |
| Full | Views on nonorganization content that is hateful | 37 | -2.1961492 | 0.4689425 | -3.4053978 | -0.9869006 |
| Full | Views on nonorganization content that is hateful | 38 | -2.1102339 | 0.5291026 | -3.4746159 | -0.7458520 |
| Full | Views on nonorganization content that is hateful | 39 | -2.1215815 | 0.4530648 | -3.2898867 | -0.9532763 |
| Full | Views on nonorganization content that is hateful | 40 | -2.0827497 | 0.5580394 | -3.5217500 | -0.6437494 |
| Full | Views on nonorganization content that is hateful | 41 | -2.0795962 | 0.8225640 | -4.2007185 | 0.0415261  |
| Full | Views on nonorganization content that is hateful | 42 | -1.3175542 | 0.9044855 | -3.6499253 | 1.0148169  |
| Full | Views on nonorganization content that is hateful | 43 | -3.2239855 | 0.7873094 | -5.2541979 | -1.1937731 |
| Full | Views on nonorganization content that is hateful | 44 | -3.0027085 | 0.9440989 | -5.4372294 | -0.5681876 |
| Full | Views on nonorganization content that is hateful | 45 | -2.9419259 | 1.1809727 | -5.9872666 | 0.1034149  |
| Full | Views on nonorganization content that is hateful | 47 | -3.2441427 | 1.0076698 | -5.8425923 | -0.6456931 |
| Full | Views on nonorganization content that is hateful | 48 | -3.0120148 | 0.3392374 | -3.8867967 | -2.1372328 |
| Full | Views on nonorganization content that is hateful | 49 | -2.9664951 | 0.9183805 | -5.3346969 | -0.5982934 |
| Full | Views on nonorganization content that is hateful | 50 | -3.2132847 | 0.9881381 | -5.7613682 | -0.6652011 |
| Full | Views on nonorganization content that is hateful | 51 | -3.1522455 | 0.6444254 | -4.8140069 | -1.4904840 |
| Full | Views on nonorganization content that is hateful | 52 | -3.0934008 | 0.7512236 | -5.0305597 | -1.1562419 |
| Full | Views on nonorganization content that is hateful | 53 | -3.0058155 | 0.7128731 | -4.8440810 | -1.1675499 |
| Full | Views on nonorganization content that is hateful | 54 | -3.1790281 | 0.9872223 | -5.7247501 | -0.6333061 |
| Full | Views on nonorganization content that is hateful | 55 | -2.9740075 | 0.7851513 | -4.9986547 | -0.9493602 |
| Full | Views on nonorganization content that is hateful | 56 | -3.3001532 | 1.5265668 | -7.2366677 | 0.6363613  |
| Full | Views on nonorganization content that is hateful | 57 | -3.1704377 | 1.0651521 | -5.9171152 | -0.4237601 |

|      |                                                  |    |            |           |            |            |
|------|--------------------------------------------------|----|------------|-----------|------------|------------|
| Full | Views on nonorganization content that is hateful | 58 | -3.0824191 | 0.9990788 | -5.6587153 | -0.5061229 |
| Full | Views on nonorganization content that is hateful | 59 | -2.9485085 | 0.8457044 | -5.1293025 | -0.7677145 |

| sample | outcome                                          | event.time | estimate   | std.error | conf.low   | conf.high  |
|--------|--------------------------------------------------|------------|------------|-----------|------------|------------|
| Most   | Views on nonorganization content that is hateful | -44        | 0.9028382  | 0.1015294 | 0.6352310  | 1.1704453  |
| Most   | Views on nonorganization content that is hateful | -43        | -0.0117749 | 0.0497893 | -0.1430077 | 0.1194580  |
| Most   | Views on nonorganization content that is hateful | -42        | -0.6443516 | 0.0825870 | -0.8620311 | -0.4266721 |
| Most   | Views on nonorganization content that is hateful | -41        | 0.1356200  | 0.0848400 | -0.0879980 | 0.3592381  |
| Most   | Views on nonorganization content that is hateful | -40        | -0.4618525 | 0.0644747 | -0.6317924 | -0.2919125 |
| Most   | Views on nonorganization content that is hateful | -39        | 0.6033268  | 0.0967860 | 0.3482222  | 0.8584315  |
| Most   | Views on nonorganization content that is hateful | -38        | -0.1227041 | 0.1071530 | -0.4051338 | 0.1597257  |
| Most   | Views on nonorganization content that is hateful | -37        | 0.4936024  | 0.0423369 | 0.3820125  | 0.6051923  |
| Most   | Views on nonorganization content that is hateful | -36        | -0.3839289 | 0.0840511 | -0.6054676 | -0.1623901 |
| Most   | Views on nonorganization content that is hateful | -35        | 0.4856263  | 0.2284212 | -0.1164375 | 1.0876901  |
| Most   | Views on nonorganization content that is hateful | -34        | 1.4527115  | 0.1832317 | 0.9697565  | 1.9356665  |
| Most   | Views on nonorganization content that is hateful | -33        | -0.0721458 | 0.3525604 | -1.0014108 | 0.8571193  |
| Most   | Views on nonorganization content that is hateful | -32        | 0.1170948  | 0.2481730 | -0.5370301 | 0.7712198  |
| Most   | Views on nonorganization content that is hateful | -31        | 0.6735606  | 0.3173346 | -0.1628577 | 1.5099789  |
| Most   | Views on nonorganization content that is hateful | -30        | 0.8258057  | 0.5409862 | -0.6001048 | 2.2517161  |
| Most   | Views on nonorganization content that is hateful | -29        | -0.1151429 | 0.2652055 | -0.8141612 | 0.5838755  |
| Most   | Views on nonorganization content that is hateful | -28        | -0.4081475 | 0.2132946 | -0.9703411 | 0.1540461  |
| Most   | Views on nonorganization content that is hateful | -27        | -0.7907718 | 0.3883987 | -1.8144982 | 0.2329546  |
| Most   | Views on nonorganization content that is hateful | -26        | -0.2663744 | 0.2910995 | -1.0336431 | 0.5008943  |
| Most   | Views on nonorganization content that is hateful | -25        | -0.1629327 | 0.1211337 | -0.4822124 | 0.1563469  |
| Most   | Views on nonorganization content that is hateful | -24        | -0.4512599 | 0.1403720 | -0.8212469 | -0.0812729 |
| Most   | Views on nonorganization content that is hateful | -23        | -0.0112543 | 0.1012966 | -0.2782478 | 0.2557393  |
| Most   | Views on nonorganization content that is hateful | -22        | 0.0718648  | 0.0919060 | -0.1703774 | 0.3141070  |
| Most   | Views on nonorganization content that is hateful | -21        | 0.0539749  | 0.1715521 | -0.3981956 | 0.5061453  |
| Most   | Views on nonorganization content that is hateful | -20        | 0.0247378  | 0.1328056 | -0.3253061 | 0.3747817  |
| Most   | Views on nonorganization content that is hateful | -19        | 0.1649830  | 0.2983086 | -0.6212872 | 0.9512532  |
| Most   | Views on nonorganization content that is hateful | -18        | 0.1918533  | 0.2031516 | -0.3436059 | 0.7273125  |
| Most   | Views on nonorganization content that is hateful | -17        | -0.0760451 | 0.2647824 | -0.7739483 | 0.6218580  |
| Most   | Views on nonorganization content that is hateful | -16        | 0.5388691  | 0.3788889 | -0.4597916 | 1.5375297  |
| Most   | Views on nonorganization content that is hateful | -15        | -0.2969028 | 0.4127760 | -1.3848818 | 0.7910762  |
| Most   | Views on nonorganization content that is hateful | -14        | 0.2183861  | 0.1999556 | -0.3086493 | 0.7454214  |
| Most   | Views on nonorganization content that is hateful | -13        | 0.0047638  | 0.2930063 | -0.7675309 | 0.7770585  |
| Most   | Views on nonorganization content that is hateful | -12        | -0.1174354 | 0.1558243 | -0.5281511 | 0.2932802  |
| Most   | Views on nonorganization content that is hateful | -11        | -0.1434382 | 0.0911548 | -0.3837004 | 0.0968240  |
| Most   | Views on nonorganization content that is hateful | -10        | -0.0883631 | 0.1483531 | -0.4793865 | 0.3026603  |
| Most   | Views on nonorganization content that is hateful | -9         | -0.0529817 | 0.1135047 | -0.3521530 | 0.2461895  |
| Most   | Views on nonorganization content that is hateful | -8         | 0.2303131  | 0.1172241 | -0.0786618 | 0.5392879  |



|      |                                                  |    |            |           |            |            |
|------|--------------------------------------------------|----|------------|-----------|------------|------------|
| Most | Views on nonorganization content that is hateful | -7 | -0.1499754 | 0.1117308 | -0.4444710 | 0.1445203  |
| Most | Views on nonorganization content that is hateful | -6 | -0.1790506 | 0.1225996 | -0.5021939 | 0.1440927  |
| Most | Views on nonorganization content that is hateful | -5 | 0.1327544  | 0.1325244 | -0.2165484 | 0.4820572  |
| Most | Views on nonorganization content that is hateful | -4 | -0.4764298 | 0.1300277 | -0.8191516 | -0.1337079 |
| Most | Views on nonorganization content that is hateful | -3 | -0.4259620 | 0.1927013 | -0.9338766 | 0.0819527  |
| Most | Views on nonorganization content that is hateful | -2 | 0.3501776  | 0.1296567 | 0.0084335  | 0.6919217  |
| Most | Views on nonorganization content that is hateful | -1 | 0.2063441  | 0.1815089 | -0.2720701 | 0.6847582  |
| Most | Views on nonorganization content that is hateful | 0  | 0.0686928  | 0.1380299 | -0.2951211 | 0.4325066  |
| Most | Views on nonorganization content that is hateful | 1  | 0.3463907  | 0.4616481 | -0.8704036 | 1.5631851  |
| Most | Views on nonorganization content that is hateful | 2  | 0.1982843  | 0.2062376 | -0.3453090 | 0.7418775  |
| Most | Views on nonorganization content that is hateful | 3  | 0.1990434  | 0.2273297 | -0.4001435 | 0.7982302  |
| Most | Views on nonorganization content that is hateful | 4  | 0.0755847  | 0.3139971 | -0.7520366 | 0.9032061  |
| Most | Views on nonorganization content that is hateful | 5  | 0.0152978  | 0.3829505 | -0.9940683 | 1.0246639  |
| Most | Views on nonorganization content that is hateful | 6  | 0.0897906  | 0.3418740 | -0.8113076 | 0.9908888  |
| Most | Views on nonorganization content that is hateful | 7  | 0.2592722  | 0.3697992 | -0.7154303 | 1.2339748  |
| Most | Views on nonorganization content that is hateful | 8  | 0.2095509  | 0.3122456 | -0.6134540 | 1.0325558  |
| Most | Views on nonorganization content that is hateful | 9  | -0.1296534 | 0.3820663 | -1.1366891 | 0.8773824  |
| Most | Views on nonorganization content that is hateful | 10 | -0.2452150 | 0.5011378 | -1.5660948 | 1.0756647  |
| Most | Views on nonorganization content that is hateful | 11 | -0.2838473 | 0.4938528 | -1.5855256 | 1.0178309  |
| Most | Views on nonorganization content that is hateful | 12 | -0.0753213 | 0.4303613 | -1.2096509 | 1.0590083  |
| Most | Views on nonorganization content that is hateful | 13 | -0.3307381 | 0.5437371 | -1.7638992 | 1.1024231  |
| Most | Views on nonorganization content that is hateful | 14 | -0.3523099 | 0.5494372 | -1.8004953 | 1.0958755  |
| Most | Views on nonorganization content that is hateful | 15 | -0.0501539 | 0.8348700 | -2.2506720 | 2.1503641  |
| Most | Views on nonorganization content that is hateful | 16 | 0.0967325  | 0.8777559 | -2.2168227 | 2.4102877  |
| Most | Views on nonorganization content that is hateful | 17 | -0.0638319 | 0.9024189 | -2.4423930 | 2.3147292  |
| Most | Views on nonorganization content that is hateful | 18 | -0.1160385 | 0.9419004 | -2.5986633 | 2.3665864  |
| Most | Views on nonorganization content that is hateful | 19 | 0.1040009  | 0.9006737 | -2.2699601 | 2.4779618  |
| Most | Views on nonorganization content that is hateful | 20 | -0.7571291 | 0.6169370 | -2.3832279 | 0.8689696  |
| Most | Views on nonorganization content that is hateful | 21 | -0.3466974 | 0.6597686 | -2.0856899 | 1.3922951  |
| Most | Views on nonorganization content that is hateful | 22 | -0.4370803 | 0.6875525 | -2.2493046 | 1.3751439  |
| Most | Views on nonorganization content that is hateful | 23 | -0.9910453 | 0.6924380 | -2.8161467 | 0.8340561  |
| Most | Views on nonorganization content that is hateful | 24 | -0.6305863 | 0.6503824 | -2.3448392 | 1.0836666  |
| Most | Views on nonorganization content that is hateful | 25 | -0.8380921 | 0.6435025 | -2.5342112 | 0.8580270  |
| Most | Views on nonorganization content that is hateful | 26 | -0.7168293 | 0.6211986 | -2.3541606 | 0.9205020  |
| Most | Views on nonorganization content that is hateful | 27 | -1.3407470 | 0.4114608 | -2.4252596 | -0.2562344 |
| Most | Views on nonorganization content that is hateful | 28 | -1.4864181 | 0.4328412 | -2.6272844 | -0.3455519 |
| Most | Views on nonorganization content that is hateful | 29 | -2.6405541 | 1.1455542 | -5.6599616 | 0.3788533  |
| Most | Views on nonorganization content that is hateful | 30 | -2.6793084 | 1.2088512 | -5.8655517 | 0.5069350  |
| Most | Views on nonorganization content that is hateful | 31 | -3.5731133 | 0.6237860 | -5.2172643 | -1.9289623 |
| Most | Views on nonorganization content that is hateful | 32 | -3.6305524 | 0.3928294 | -4.6659571 | -2.5951477 |
| Most | Views on nonorganization content that is hateful | 33 | -3.6201454 | 0.4123280 | -4.7069436 | -2.5333472 |

|      |                                                  |    |            |           |            |            |
|------|--------------------------------------------------|----|------------|-----------|------------|------------|
| Most | Views on nonorganization content that is hateful | 34 | -2.7680400 | 0.3867708 | -3.7874755 | -1.7486045 |
| Most | Views on nonorganization content that is hateful | 35 | -2.5138609 | 0.4843114 | -3.7903901 | -1.2373316 |
| Most | Views on nonorganization content that is hateful | 36 | -2.4159148 | 0.5084711 | -3.7561234 | -1.0757062 |
| Most | Views on nonorganization content that is hateful | 37 | -2.6270616 | 0.4196506 | -3.7331605 | -1.5209626 |
| Most | Views on nonorganization content that is hateful | 38 | -2.5640700 | 0.4398226 | -3.7233376 | -1.4048024 |
| Most | Views on nonorganization content that is hateful | 39 | -2.6014280 | 0.4744996 | -3.8520958 | -1.3507602 |
| Most | Views on nonorganization content that is hateful | 40 | -2.5858833 | 0.6739363 | -4.3622187 | -0.8095479 |
| Most | Views on nonorganization content that is hateful | 41 | -2.6710318 | 0.6123281 | -4.2849825 | -1.0570811 |
| Most | Views on nonorganization content that is hateful | 42 | -1.7382628 | 1.0656586 | -4.5470846 | 1.0705590  |
| Most | Views on nonorganization content that is hateful | 43 | -3.7573305 | 0.6130533 | -5.3731927 | -2.1414682 |
| Most | Views on nonorganization content that is hateful | 44 | -3.3091936 | 1.0319054 | -6.0290501 | -0.5893371 |
| Most | Views on nonorganization content that is hateful | 45 | -3.3476799 | 0.8631929 | -5.6228505 | -1.0725094 |
| Most | Views on nonorganization content that is hateful | 47 | -4.8269663 | 0.2507334 | -5.4878398 | -4.1660928 |
| Most | Views on nonorganization content that is hateful | 48 | -4.4768498 | 0.0852371 | -4.7015145 | -4.2521850 |
| Most | Views on nonorganization content that is hateful | 49 | -4.4411037 | 0.2481596 | -5.0951933 | -3.7870141 |
| Most | Views on nonorganization content that is hateful | 50 | -4.7941180 | 0.2583995 | -5.4751973 | -4.1130386 |
| Most | Views on nonorganization content that is hateful | 51 | -4.4220525 | 0.2535913 | -5.0904587 | -3.7536463 |
| Most | Views on nonorganization content that is hateful | 52 | -4.1693978 | 0.3531648 | -5.1002559 | -3.2385396 |
| Most | Views on nonorganization content that is hateful | 53 | -3.9875108 | 0.3292649 | -4.8553744 | -3.1196471 |
| Most | Views on nonorganization content that is hateful | 54 | -4.4037558 | 0.2639296 | -5.0994112 | -3.7081004 |
| Most | Views on nonorganization content that is hateful | 55 | -4.0787910 | 0.2219136 | -4.6637024 | -3.4938795 |
| Most | Views on nonorganization content that is hateful | 56 | -3.7453483 | 0.3667219 | -4.7119397 | -2.7787569 |
| Most | Views on nonorganization content that is hateful | 57 | -3.6056767 | 0.3302972 | -4.4762612 | -2.7350921 |
| Most | Views on nonorganization content that is hateful | 58 | -3.5275578 | 0.3258986 | -4.3865486 | -2.6685670 |
| Most | Views on nonorganization content that is hateful | 59 | -3.3928202 | 0.2094091 | -3.9447725 | -2.8408679 |

| sample | outcome                                          | event.time | estimate   | std.error | conf.low   | conf.high  |
|--------|--------------------------------------------------|------------|------------|-----------|------------|------------|
| Middle | Views on nonorganization content that is hateful | -44        | 0.2284093  | 0.0779858 | 0.0211300  | 0.4356886  |
| Middle | Views on nonorganization content that is hateful | -43        | -0.0019370 | 0.0488578 | -0.1317965 | 0.1279225  |
| Middle | Views on nonorganization content that is hateful | -42        | -0.2596545 | 0.0632184 | -0.4276834 | -0.0916257 |
| Middle | Views on nonorganization content that is hateful | -41        | -0.0218325 | 0.0609110 | -0.1837283 | 0.1400633  |
| Middle | Views on nonorganization content that is hateful | -40        | -0.0795324 | 0.0695809 | -0.2644720 | 0.1054072  |
| Middle | Views on nonorganization content that is hateful | -39        | 0.2028153  | 0.0860455 | -0.0258858 | 0.4315164  |
| Middle | Views on nonorganization content that is hateful | -38        | -0.0262172 | 0.0692910 | -0.2103863 | 0.1579520  |
| Middle | Views on nonorganization content that is hateful | -37        | 0.0412408  | 0.0456235 | -0.0800224 | 0.1625039  |
| Middle | Views on nonorganization content that is hateful | -36        | 0.1345733  | 0.0816084 | -0.0823344 | 0.3514809  |
| Middle | Views on nonorganization content that is hateful | -35        | 0.0953668  | 0.1920889 | -0.4151880 | 0.6059216  |
| Middle | Views on nonorganization content that is hateful | -34        | 0.9556047  | 0.1186744 | 0.6401789  | 1.2710305  |
| Middle | Views on nonorganization content that is hateful | -33        | 0.4289809  | 0.2824322 | -0.3216983 | 1.1796600  |
| Middle | Views on nonorganization content that is hateful | -32        | 0.4938579  | 0.1669932 | 0.0500052  | 0.9377107  |
| Middle | Views on nonorganization content that is hateful | -31        | 0.1410256  | 0.2904208 | -0.6308863 | 0.9129375  |

|        |                                                  |     |            |           |            |           |
|--------|--------------------------------------------------|-----|------------|-----------|------------|-----------|
| Middle | Views on nonorganization content that is hateful | -30 | 0.7618863  | 0.4406131 | -0.4092232 | 1.9329959 |
| Middle | Views on nonorganization content that is hateful | -29 | -0.0731730 | 0.1262891 | -0.4088379 | 0.2624920 |
| Middle | Views on nonorganization content that is hateful | -28 | -0.3919541 | 0.1485944 | -0.7869044 | 0.0029962 |
| Middle | Views on nonorganization content that is hateful | -27 | -0.1288315 | 0.4189871 | -1.2424610 | 0.9847980 |
| Middle | Views on nonorganization content that is hateful | -26 | -0.3649738 | 0.2566909 | -1.0472349 | 0.3172873 |
| Middle | Views on nonorganization content that is hateful | -25 | 0.0981188  | 0.2177237 | -0.4805710 | 0.6768086 |
| Middle | Views on nonorganization content that is hateful | -24 | -0.2385809 | 0.1379407 | -0.6052147 | 0.1280530 |
| Middle | Views on nonorganization content that is hateful | -23 | -0.1558146 | 0.0867146 | -0.3862941 | 0.0746649 |
| Middle | Views on nonorganization content that is hateful | -22 | 0.1193083  | 0.0639203 | -0.0505859 | 0.2892025 |
| Middle | Views on nonorganization content that is hateful | -21 | 0.0010794  | 0.0883847 | -0.2338391 | 0.2359979 |
| Middle | Views on nonorganization content that is hateful | -20 | -0.0349848 | 0.0873421 | -0.2671322 | 0.1971626 |
| Middle | Views on nonorganization content that is hateful | -19 | 0.2669484  | 0.2447742 | -0.3836390 | 0.9175358 |
| Middle | Views on nonorganization content that is hateful | -18 | 0.0751510  | 0.0747133 | -0.1234302 | 0.2737322 |
| Middle | Views on nonorganization content that is hateful | -17 | 0.2076485  | 0.1611369 | -0.2206387 | 0.6359357 |
| Middle | Views on nonorganization content that is hateful | -16 | 0.0167497  | 0.2541332 | -0.6587131 | 0.6922124 |
| Middle | Views on nonorganization content that is hateful | -15 | 0.0437607  | 0.1290885 | -0.2993449 | 0.3868662 |
| Middle | Views on nonorganization content that is hateful | -14 | 0.0100876  | 0.1414127 | -0.3657744 | 0.3859496 |
| Middle | Views on nonorganization content that is hateful | -13 | -0.0079337 | 0.2887635 | -0.7754407 | 0.7595733 |
| Middle | Views on nonorganization content that is hateful | -12 | -0.0155480 | 0.2065861 | -0.5646349 | 0.5335390 |
| Middle | Views on nonorganization content that is hateful | -11 | -0.1729105 | 0.0972461 | -0.4313818 | 0.0855607 |
| Middle | Views on nonorganization content that is hateful | -10 | -0.0517266 | 0.2151716 | -0.6236329 | 0.5201798 |
| Middle | Views on nonorganization content that is hateful | -9  | -0.0890893 | 0.1274864 | -0.4279365 | 0.2497579 |
| Middle | Views on nonorganization content that is hateful | -8  | 0.1694593  | 0.1549110 | -0.2422800 | 0.5811985 |
| Middle | Views on nonorganization content that is hateful | -7  | -0.1215154 | 0.1180736 | -0.4353443 | 0.1923135 |
| Middle | Views on nonorganization content that is hateful | -6  | -0.2980012 | 0.1513817 | -0.7003598 | 0.1043575 |
| Middle | Views on nonorganization content that is hateful | -5  | -0.0280039 | 0.1630706 | -0.4614306 | 0.4054228 |
| Middle | Views on nonorganization content that is hateful | -4  | -0.3397874 | 0.1960039 | -0.8607480 | 0.1811731 |
| Middle | Views on nonorganization content that is hateful | -3  | -0.4456123 | 0.2316705 | -1.0613713 | 0.1701467 |
| Middle | Views on nonorganization content that is hateful | -2  | 0.2009374  | 0.1881422 | -0.2991274 | 0.7010022 |
| Middle | Views on nonorganization content that is hateful | -1  | 0.3020005  | 0.1349295 | -0.0566298 | 0.6606308 |
| Middle | Views on nonorganization content that is hateful | 0   | 0.0601096  | 0.1510140 | -0.3412718 | 0.4614910 |
| Middle | Views on nonorganization content that is hateful | 1   | 0.1425858  | 0.1707422 | -0.3112315 | 0.5964031 |
| Middle | Views on nonorganization content that is hateful | 2   | 0.1880102  | 0.2214574 | -0.4006034 | 0.7766237 |
| Middle | Views on nonorganization content that is hateful | 3   | 0.1669510  | 0.3263596 | -0.7004829 | 1.0343849 |
| Middle | Views on nonorganization content that is hateful | 4   | 0.1628470  | 0.3729734 | -0.8284822 | 1.1541762 |
| Middle | Views on nonorganization content that is hateful | 5   | 0.0675894  | 0.5203738 | -1.3155167 | 1.4506954 |
| Middle | Views on nonorganization content that is hateful | 6   | 0.1992772  | 0.4473188 | -0.9896554 | 1.3882098 |
| Middle | Views on nonorganization content that is hateful | 7   | 0.3309370  | 0.4593355 | -0.8899348 | 1.5518088 |
| Middle | Views on nonorganization content that is hateful | 8   | 0.1862259  | 0.4196670 | -0.9292108 | 1.3016625 |
| Middle | Views on nonorganization content that is hateful | 9   | 0.0085421  | 0.4214609 | -1.1116624 | 1.1287466 |
| Middle | Views on nonorganization content that is hateful | 10  | 0.0872690  | 0.4991651 | -1.2394664 | 1.4140044 |

|        |                                                  |    |            |           |            |            |
|--------|--------------------------------------------------|----|------------|-----------|------------|------------|
| Middle | Views on nonorganization content that is hateful | 11 | 0.0864520  | 0.5884469 | -1.4775861 | 1.6504901  |
| Middle | Views on nonorganization content that is hateful | 12 | 0.2001524  | 0.4932522 | -1.1108670 | 1.5111718  |
| Middle | Views on nonorganization content that is hateful | 13 | 0.0389528  | 0.7233942 | -1.8837631 | 1.9616686  |
| Middle | Views on nonorganization content that is hateful | 14 | -0.1021873 | 0.6879804 | -1.9307763 | 1.7264018  |
| Middle | Views on nonorganization content that is hateful | 15 | 0.3585133  | 1.0115591 | -2.3301184 | 3.0471451  |
| Middle | Views on nonorganization content that is hateful | 16 | 0.4024846  | 1.1283369 | -2.5965318 | 3.4015010  |
| Middle | Views on nonorganization content that is hateful | 17 | 0.2947150  | 1.2225681 | -2.9547594 | 3.5441893  |
| Middle | Views on nonorganization content that is hateful | 18 | 0.3280439  | 1.2445498 | -2.9798558 | 3.6359435  |
| Middle | Views on nonorganization content that is hateful | 19 | 0.2899933  | 1.1345053 | -2.7254182 | 3.3054048  |
| Middle | Views on nonorganization content that is hateful | 20 | -0.3319519 | 0.7618131 | -2.3567816 | 1.6928778  |
| Middle | Views on nonorganization content that is hateful | 21 | -0.0328307 | 0.7519531 | -2.0314534 | 1.9657919  |
| Middle | Views on nonorganization content that is hateful | 22 | -0.1094129 | 0.8118593 | -2.2672608 | 2.0484351  |
| Middle | Views on nonorganization content that is hateful | 23 | -0.4354070 | 0.8376703 | -2.6618582 | 1.7910441  |
| Middle | Views on nonorganization content that is hateful | 24 | -0.2326501 | 0.8576938 | -2.5123219 | 2.0470216  |
| Middle | Views on nonorganization content that is hateful | 25 | -0.2746430 | 0.8299943 | -2.4806922 | 1.9314061  |
| Middle | Views on nonorganization content that is hateful | 26 | -0.3993732 | 0.7223164 | -2.3192242 | 1.5204779  |
| Middle | Views on nonorganization content that is hateful | 27 | -1.3080091 | 0.3125083 | -2.1386276 | -0.4773906 |
| Middle | Views on nonorganization content that is hateful | 28 | -1.2803069 | 0.4044905 | -2.3554056 | -0.2052081 |
| Middle | Views on nonorganization content that is hateful | 29 | -2.0986242 | 0.7850482 | -4.1852107 | -0.0120377 |
| Middle | Views on nonorganization content that is hateful | 30 | -2.2925178 | 0.7232753 | -4.2149176 | -0.3701181 |
| Middle | Views on nonorganization content that is hateful | 31 | -2.6857700 | 0.2954126 | -3.4709498 | -1.9005902 |
| Middle | Views on nonorganization content that is hateful | 32 | -2.6475729 | 0.4861277 | -3.9396559 | -1.3554899 |
| Middle | Views on nonorganization content that is hateful | 33 | -2.6237850 | 0.4879960 | -3.9208339 | -1.3267362 |
| Middle | Views on nonorganization content that is hateful | 34 | -1.9719394 | 0.3781587 | -2.9770508 | -0.9668281 |
| Middle | Views on nonorganization content that is hateful | 35 | -1.8195900 | 0.3528119 | -2.7573319 | -0.8818480 |
| Middle | Views on nonorganization content that is hateful | 36 | -1.7970117 | 0.3905274 | -2.8349979 | -0.7590255 |
| Middle | Views on nonorganization content that is hateful | 37 | -2.0724249 | 0.3005161 | -2.8711694 | -1.2736805 |
| Middle | Views on nonorganization content that is hateful | 38 | -2.0054042 | 0.3268014 | -2.8740125 | -1.1367959 |
| Middle | Views on nonorganization content that is hateful | 39 | -2.0272716 | 0.3153210 | -2.8653661 | -1.1891771 |
| Middle | Views on nonorganization content that is hateful | 40 | -1.9708343 | 0.3876326 | -3.0011264 | -0.9405422 |
| Middle | Views on nonorganization content that is hateful | 41 | -1.9189679 | 0.4942646 | -3.2326780 | -0.6052578 |
| Middle | Views on nonorganization content that is hateful | 42 | -1.1629490 | 0.8150788 | -3.3293540 | 1.0034561  |
| Middle | Views on nonorganization content that is hateful | 43 | -2.7816879 | 0.8747568 | -5.1067116 | -0.4566642 |
| Middle | Views on nonorganization content that is hateful | 44 | -2.7403843 | 0.7976359 | -4.8604278 | -0.6203408 |
| Middle | Views on nonorganization content that is hateful | 45 | -2.5613387 | 1.0963231 | -5.4752654 | 0.3525880  |
| Middle | Views on nonorganization content that is hateful | 47 | -3.1734376 | 0.4368791 | -4.3346224 | -2.0122527 |
| Middle | Views on nonorganization content that is hateful | 48 | -2.9428380 | 0.1538620 | -3.3517892 | -2.5338868 |
| Middle | Views on nonorganization content that is hateful | 49 | -2.9402324 | 0.3857594 | -3.9655458 | -1.9149190 |
| Middle | Views on nonorganization content that is hateful | 50 | -3.1450143 | 0.4213647 | -4.2649633 | -2.0250654 |
| Middle | Views on nonorganization content that is hateful | 51 | -2.9983276 | 0.3751305 | -3.9953902 | -2.0012649 |
| Middle | Views on nonorganization content that is hateful | 52 | -3.0254878 | 0.4350215 | -4.1817352 | -1.8692404 |

|        |                                                  |    |            |           |            |            |
|--------|--------------------------------------------------|----|------------|-----------|------------|------------|
| Middle | Views on nonorganization content that is hateful | 53 | -2.8803292 | 0.3301755 | -3.7579056 | -2.0027529 |
| Middle | Views on nonorganization content that is hateful | 54 | -3.0503328 | 0.4475762 | -4.2399494 | -1.8607161 |
| Middle | Views on nonorganization content that is hateful | 55 | -2.8470147 | 0.3455749 | -3.7655212 | -1.9285081 |
| Middle | Views on nonorganization content that is hateful | 56 | -2.9157941 | 0.9629571 | -5.4752461 | -0.3563421 |
| Middle | Views on nonorganization content that is hateful | 57 | -2.8999387 | 1.1009376 | -5.8261304 | 0.0262530  |
| Middle | Views on nonorganization content that is hateful | 58 | -2.6529310 | 0.9799655 | -5.2575900 | -0.0482721 |
| Middle | Views on nonorganization content that is hateful | 59 | -2.6041986 | 1.0420355 | -5.3738339 | 0.1654366  |

| sample | outcome                                          | event.time | estimate   | std.error | conf.low   | conf.high |
|--------|--------------------------------------------------|------------|------------|-----------|------------|-----------|
| Least  | Views on nonorganization content that is hateful | -44        | 0.0889137  | 0.0985427 | -0.1724643 | 0.3502917 |
| Least  | Views on nonorganization content that is hateful | -43        | 0.0083944  | 0.0723673 | -0.1835552 | 0.2003441 |
| Least  | Views on nonorganization content that is hateful | -42        | 0.0103021  | 0.0704042 | -0.1764403 | 0.1970446 |
| Least  | Views on nonorganization content that is hateful | -41        | -0.0918864 | 0.0848789 | -0.3170222 | 0.1332494 |
| Least  | Views on nonorganization content that is hateful | -40        | 0.0455610  | 0.0873866 | -0.1862262 | 0.2773482 |
| Least  | Views on nonorganization content that is hateful | -39        | 0.0147353  | 0.0962962 | -0.2406840 | 0.2701546 |
| Least  | Views on nonorganization content that is hateful | -38        | 0.0305449  | 0.0619490 | -0.1337708 | 0.1948606 |
| Least  | Views on nonorganization content that is hateful | -37        | 0.0420841  | 0.0461702 | -0.0803795 | 0.1645476 |
| Least  | Views on nonorganization content that is hateful | -36        | -0.0057757 | 0.0760561 | -0.2075096 | 0.1959582 |
| Least  | Views on nonorganization content that is hateful | -35        | 0.1355632  | 0.1896383 | -0.3674401 | 0.6385665 |
| Least  | Views on nonorganization content that is hateful | -34        | 0.3130993  | 0.1038157 | 0.0377349  | 0.5884637 |
| Least  | Views on nonorganization content that is hateful | -33        | 0.2655132  | 0.2364112 | -0.3615520 | 0.8925785 |
| Least  | Views on nonorganization content that is hateful | -32        | 0.2732977  | 0.2358829 | -0.3523663 | 0.8989618 |
| Least  | Views on nonorganization content that is hateful | -31        | 0.1688040  | 0.2190543 | -0.4122232 | 0.7498313 |
| Least  | Views on nonorganization content that is hateful | -30        | 0.6215212  | 0.3704018 | -0.3609453 | 1.6039877 |
| Least  | Views on nonorganization content that is hateful | -29        | -0.0349158 | 0.1025608 | -0.3069518 | 0.2371201 |
| Least  | Views on nonorganization content that is hateful | -28        | 0.0928936  | 0.0707013 | -0.0946369 | 0.2804241 |
| Least  | Views on nonorganization content that is hateful | -27        | -0.1784747 | 0.4596573 | -1.3976856 | 1.0407362 |
| Least  | Views on nonorganization content that is hateful | -26        | -0.1846186 | 0.3053230 | -0.9944678 | 0.6252307 |
| Least  | Views on nonorganization content that is hateful | -25        | -0.0639861 | 0.1830946 | -0.5496325 | 0.4216603 |
| Least  | Views on nonorganization content that is hateful | -24        | -0.0946536 | 0.1502114 | -0.4930795 | 0.3037723 |
| Least  | Views on nonorganization content that is hateful | -23        | 0.1058585  | 0.1362423 | -0.2555153 | 0.4672322 |
| Least  | Views on nonorganization content that is hateful | -22        | -0.1038056 | 0.1111418 | -0.3986021 | 0.1909908 |
| Least  | Views on nonorganization content that is hateful | -21        | 0.1820744  | 0.1002080 | -0.0837207 | 0.4478696 |
| Least  | Views on nonorganization content that is hateful | -20        | -0.0588880 | 0.0842998 | -0.2824876 | 0.1647115 |
| Least  | Views on nonorganization content that is hateful | -19        | 0.3527459  | 0.1875407 | -0.1446936 | 0.8501854 |
| Least  | Views on nonorganization content that is hateful | -18        | 0.0812711  | 0.1041530 | -0.1949879 | 0.3575300 |
| Least  | Views on nonorganization content that is hateful | -17        | 0.0243410  | 0.1462008 | -0.3634471 | 0.4121292 |
| Least  | Views on nonorganization content that is hateful | -16        | 0.2293041  | 0.1864181 | -0.2651578 | 0.7237659 |
| Least  | Views on nonorganization content that is hateful | -15        | -0.0789341 | 0.0881019 | -0.3126186 | 0.1547504 |
| Least  | Views on nonorganization content that is hateful | -14        | -0.0427411 | 0.1318600 | -0.3924912 | 0.3070090 |
| Least  | Views on nonorganization content that is hateful | -13        | 0.0513424  | 0.2655144 | -0.6529172 | 0.7556020 |

|       |                                                  |     |            |           |            |            |
|-------|--------------------------------------------------|-----|------------|-----------|------------|------------|
| Least | Views on nonorganization content that is hateful | -12 | -0.2060017 | 0.1454642 | -0.5918360 | 0.1798327  |
| Least | Views on nonorganization content that is hateful | -11 | 0.0295559  | 0.0820131 | -0.1879785 | 0.2470902  |
| Least | Views on nonorganization content that is hateful | -10 | -0.1588217 | 0.1651669 | -0.5969161 | 0.2792728  |
| Least | Views on nonorganization content that is hateful | -9  | -0.2094038 | 0.1172664 | -0.5204453 | 0.1016376  |
| Least | Views on nonorganization content that is hateful | -8  | 0.1548899  | 0.1098382 | -0.1364487 | 0.4462286  |
| Least | Views on nonorganization content that is hateful | -7  | 0.0732188  | 0.1034479 | -0.2011701 | 0.3476076  |
| Least | Views on nonorganization content that is hateful | -6  | -0.2216082 | 0.1482215 | -0.6147559 | 0.1715395  |
| Least | Views on nonorganization content that is hateful | -5  | -0.1618133 | 0.1660335 | -0.6022065 | 0.2785798  |
| Least | Views on nonorganization content that is hateful | -4  | -0.1424287 | 0.1387879 | -0.5105545 | 0.2256972  |
| Least | Views on nonorganization content that is hateful | -3  | -0.4278839 | 0.2298952 | -1.0376658 | 0.1818980  |
| Least | Views on nonorganization content that is hateful | -2  | 0.1521978  | 0.1799179 | -0.3250226 | 0.6294182  |
| Least | Views on nonorganization content that is hateful | -1  | 0.1291167  | 0.1315970 | -0.2199358 | 0.4781692  |
| Least | Views on nonorganization content that is hateful | 0   | 0.0259639  | 0.1795197 | -0.4502004 | 0.5021281  |
| Least | Views on nonorganization content that is hateful | 1   | 0.2087783  | 0.2715990 | -0.5116202 | 0.9291768  |
| Least | Views on nonorganization content that is hateful | 2   | 0.1935650  | 0.2521310 | -0.4751960 | 0.8623259  |
| Least | Views on nonorganization content that is hateful | 3   | 0.0511566  | 0.2971881 | -0.7371154 | 0.8394286  |
| Least | Views on nonorganization content that is hateful | 4   | -0.0265186 | 0.3387464 | -0.9250213 | 0.8719842  |
| Least | Views on nonorganization content that is hateful | 5   | -0.0671706 | 0.4418752 | -1.2392155 | 1.1048744  |
| Least | Views on nonorganization content that is hateful | 6   | 0.2124678  | 0.4013117 | -0.8519852 | 1.2769207  |
| Least | Views on nonorganization content that is hateful | 7   | 0.2406463  | 0.4458975 | -0.9420677 | 1.4233603  |
| Least | Views on nonorganization content that is hateful | 8   | 0.0160609  | 0.3943279 | -1.0298680 | 1.0619898  |
| Least | Views on nonorganization content that is hateful | 9   | -0.0529050 | 0.4033166 | -1.1226758 | 1.0168658  |
| Least | Views on nonorganization content that is hateful | 10  | -0.0939421 | 0.4873507 | -1.3866079 | 1.1987237  |
| Least | Views on nonorganization content that is hateful | 11  | -0.1461021 | 0.5022594 | -1.4783122 | 1.1861080  |
| Least | Views on nonorganization content that is hateful | 12  | -0.1311114 | 0.4764401 | -1.3948378 | 1.1326149  |
| Least | Views on nonorganization content that is hateful | 13  | -0.2656731 | 0.5603868 | -1.7520626 | 1.2207163  |
| Least | Views on nonorganization content that is hateful | 14  | -0.3216599 | 0.4840058 | -1.6054537 | 0.9621339  |
| Least | Views on nonorganization content that is hateful | 15  | 0.1228207  | 0.8259644 | -2.0679959 | 2.3136373  |
| Least | Views on nonorganization content that is hateful | 16  | 0.0701616  | 0.7572375 | -1.9383614 | 2.0786846  |
| Least | Views on nonorganization content that is hateful | 17  | -0.1073331 | 0.9172309 | -2.5402282 | 2.3255621  |
| Least | Views on nonorganization content that is hateful | 18  | -0.1038020 | 0.9149025 | -2.5305211 | 2.3229170  |
| Least | Views on nonorganization content that is hateful | 19  | -0.1022491 | 0.8590371 | -2.3807889 | 2.1762906  |
| Least | Views on nonorganization content that is hateful | 20  | -0.5618561 | 0.5379586 | -1.9887562 | 0.8650440  |
| Least | Views on nonorganization content that is hateful | 21  | -0.2579522 | 0.5966898 | -1.8406328 | 1.3247284  |
| Least | Views on nonorganization content that is hateful | 22  | -0.3310175 | 0.5775762 | -1.8630005 | 1.2009655  |
| Least | Views on nonorganization content that is hateful | 23  | -0.6224676 | 0.5726528 | -2.1413916 | 0.8964565  |
| Least | Views on nonorganization content that is hateful | 24  | -0.4663654 | 0.5641250 | -1.9626701 | 1.0299393  |
| Least | Views on nonorganization content that is hateful | 25  | -0.5461885 | 0.6012600 | -2.1409915 | 1.0486145  |
| Least | Views on nonorganization content that is hateful | 26  | -0.5494174 | 0.4988450 | -1.8725712 | 0.7737364  |
| Least | Views on nonorganization content that is hateful | 27  | -1.3044693 | 0.2187797 | -1.8847681 | -0.7241705 |
| Least | Views on nonorganization content that is hateful | 28  | -1.3459475 | 0.2600375 | -2.0356801 | -0.6562150 |

|       |                                                  |    |            |           |            |            |
|-------|--------------------------------------------------|----|------------|-----------|------------|------------|
| Least | Views on nonorganization content that is hateful | 29 | -2.1419102 | 0.1948250 | -2.6586709 | -1.6251495 |
| Least | Views on nonorganization content that is hateful | 30 | -2.2687508 | 0.2389761 | -2.9026193 | -1.6348824 |
| Least | Views on nonorganization content that is hateful | 31 | -2.4379800 | 0.3488322 | -3.3632345 | -1.5127255 |
| Least | Views on nonorganization content that is hateful | 32 | -2.4330890 | 0.4000567 | -3.4942131 | -1.3719648 |
| Least | Views on nonorganization content that is hateful | 33 | -2.2318913 | 0.5267880 | -3.6291621 | -0.8346204 |
| Least | Views on nonorganization content that is hateful | 34 | -1.9165989 | 0.4090598 | -3.0016033 | -0.8315945 |
| Least | Views on nonorganization content that is hateful | 35 | -1.8853222 | 0.4935855 | -3.1945254 | -0.5761190 |
| Least | Views on nonorganization content that is hateful | 36 | -1.8016969 | 0.4027256 | -2.8699002 | -0.7334936 |
| Least | Views on nonorganization content that is hateful | 37 | -2.0769044 | 0.2387597 | -2.7101988 | -1.4436099 |
| Least | Views on nonorganization content that is hateful | 38 | -1.9526363 | 0.2956384 | -2.7367978 | -1.1684749 |
| Least | Views on nonorganization content that is hateful | 39 | -1.9341857 | 0.3443722 | -2.8476104 | -1.0207611 |
| Least | Views on nonorganization content that is hateful | 40 | -1.9026289 | 0.3643726 | -2.8691035 | -0.9361544 |
| Least | Views on nonorganization content that is hateful | 41 | -1.9043893 | 0.4687280 | -3.1476598 | -0.6611189 |
| Least | Views on nonorganization content that is hateful | 42 | -1.1710631 | 0.9109077 | -3.5871862 | 1.2450599  |
| Least | Views on nonorganization content that is hateful | 43 | -3.2773874 | 0.4878172 | -4.5712908 | -1.9834841 |
| Least | Views on nonorganization content that is hateful | 44 | -3.0459772 | 0.4127658 | -4.1408115 | -1.9511430 |
| Least | Views on nonorganization content that is hateful | 45 | -3.0505534 | 0.4486457 | -4.2405567 | -1.8605501 |
| Least | Views on nonorganization content that is hateful | 47 | -2.6563247 | 0.3855049 | -3.6788513 | -1.6337982 |
| Least | Views on nonorganization content that is hateful | 48 | -2.4721133 | 0.1274166 | -2.8100774 | -2.1341493 |
| Least | Views on nonorganization content that is hateful | 49 | -2.3754836 | 0.3491094 | -3.3014734 | -1.4494938 |
| Least | Views on nonorganization content that is hateful | 50 | -2.6236365 | 0.3344135 | -3.5106465 | -1.7366264 |
| Least | Views on nonorganization content that is hateful | 51 | -2.6356718 | 0.3958637 | -3.6856743 | -1.5856694 |
| Least | Views on nonorganization content that is hateful | 52 | -2.5824736 | 0.3354963 | -3.4723557 | -1.6925916 |
| Least | Views on nonorganization content that is hateful | 53 | -2.6140503 | 0.3215157 | -3.4668496 | -1.7612511 |
| Least | Views on nonorganization content that is hateful | 54 | -2.6576577 | 0.4786964 | -3.9273685 | -1.3879468 |
| Least | Views on nonorganization content that is hateful | 55 | -2.5164623 | 0.4235551 | -3.6399144 | -1.3930101 |
| Least | Views on nonorganization content that is hateful | 56 | -3.3681106 | 0.7799967 | -5.4370009 | -1.2992203 |
| Least | Views on nonorganization content that is hateful | 57 | -3.0745589 | 0.4016030 | -4.1397847 | -2.0093332 |
| Least | Views on nonorganization content that is hateful | 58 | -3.2200310 | 0.3802412 | -4.2285958 | -2.2114662 |
| Least | Views on nonorganization content that is hateful | 59 | -2.9557518 | 0.3226675 | -3.8116062 | -2.0998974 |

## Hateful comments by audience members

Average effect by length of exposure (Callaway and Sant'Anna)

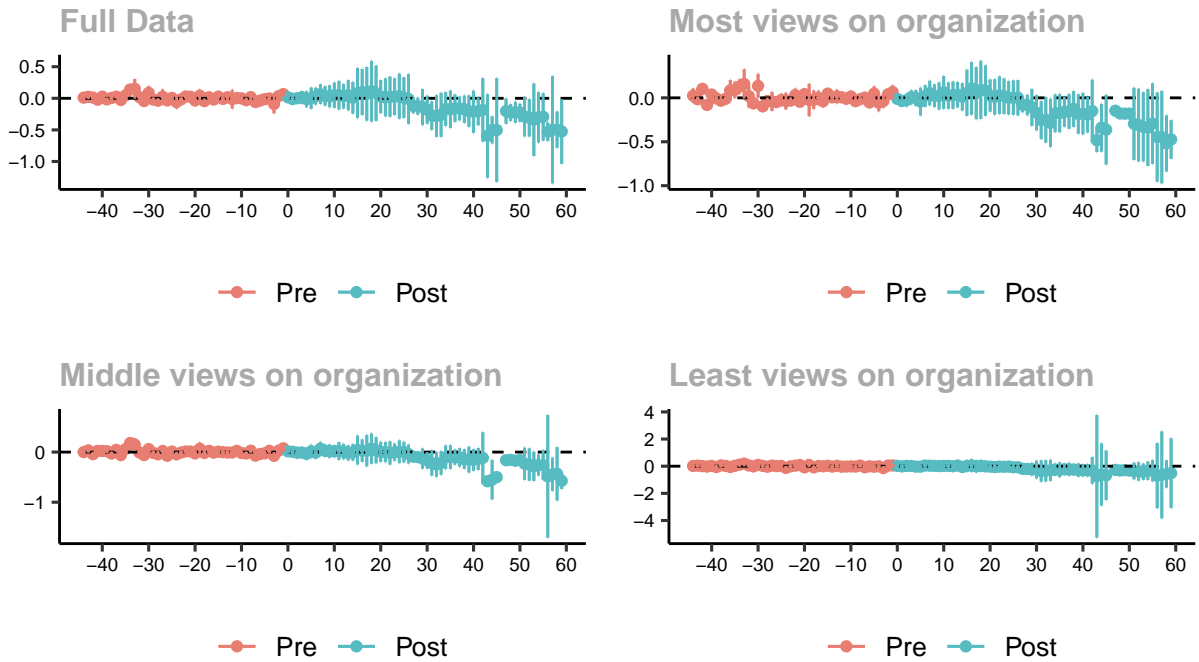

Long timeframe with sampled control groups

| sample | outcome                              | event.time | estimate   | std.error | conf.low   | conf.high  |
|--------|--------------------------------------|------------|------------|-----------|------------|------------|
| Full   | Hateful comments by audience members | -44        | 0.0107923  | 0.0199071 | -0.0417581 | 0.0633426  |
| Full   | Hateful comments by audience members | -43        | 0.0234892  | 0.0105282 | -0.0043028 | 0.0512813  |
| Full   | Hateful comments by audience members | -42        | 0.0113307  | 0.0272665 | -0.0606471 | 0.0833085  |
| Full   | Hateful comments by audience members | -41        | -0.0216093 | 0.0142449 | -0.0592127 | 0.0159942  |
| Full   | Hateful comments by audience members | -40        | 0.0258166  | 0.0108401 | -0.0027989 | 0.0544320  |
| Full   | Hateful comments by audience members | -39        | -0.0174291 | 0.0063979 | -0.0343181 | -0.0005402 |
| Full   | Hateful comments by audience members | -38        | 0.0067941  | 0.0199865 | -0.0459660 | 0.0595543  |
| Full   | Hateful comments by audience members | -37        | 0.0257411  | 0.0069464 | 0.0074042  | 0.0440780  |
| Full   | Hateful comments by audience members | -36        | -0.0267375 | 0.0161411 | -0.0693464 | 0.0158715  |
| Full   | Hateful comments by audience members | -35        | 0.0467707  | 0.0213962 | -0.0097107 | 0.1032522  |
| Full   | Hateful comments by audience members | -34        | 0.1390296  | 0.0262619 | 0.0697038  | 0.2083554  |
| Full   | Hateful comments by audience members | -33        | 0.1493068  | 0.0591530 | -0.0068442 | 0.3054579  |
| Full   | Hateful comments by audience members | -32        | 0.0183494  | 0.0252383 | -0.0482741 | 0.0849730  |
| Full   | Hateful comments by audience members | -31        | -0.0433660 | 0.0111039 | -0.0726778 | -0.0140542 |
| Full   | Hateful comments by audience members | -30        | 0.0862547  | 0.0409004 | -0.0217135 | 0.1942229  |
| Full   | Hateful comments by audience members | -29        | -0.0195284 | 0.0119690 | -0.0511239 | 0.0120671  |
| Full   | Hateful comments by audience members | -28        | -0.0379703 | 0.0148995 | -0.0773019 | 0.0013612  |
| Full   | Hateful comments by audience members | -27        | 0.0252935  | 0.0433997 | -0.0892722 | 0.1398593  |
| Full   | Hateful comments by audience members | -26        | -0.0337272 | 0.0234808 | -0.0957113 | 0.0282570  |



|      |                                      |     |            |           |            |            |
|------|--------------------------------------|-----|------------|-----------|------------|------------|
| Full | Hateful comments by audience members | -25 | 0.0062279  | 0.0160075 | -0.0360285 | 0.0484844  |
| Full | Hateful comments by audience members | -24 | -0.0593262 | 0.0388529 | -0.1618895 | 0.0432371  |
| Full | Hateful comments by audience members | -23 | -0.0148077 | 0.0104805 | -0.0424740 | 0.0128587  |
| Full | Hateful comments by audience members | -22 | 0.0289788  | 0.0106778 | 0.0007916  | 0.0571660  |
| Full | Hateful comments by audience members | -21 | 0.0240205  | 0.0123026 | -0.0084556 | 0.0564966  |
| Full | Hateful comments by audience members | -20 | -0.0342794 | 0.0304859 | -0.1147556 | 0.0461968  |
| Full | Hateful comments by audience members | -19 | 0.0414865  | 0.0358440 | -0.0531340 | 0.1361070  |
| Full | Hateful comments by audience members | -18 | -0.0450310 | 0.0165151 | -0.0886272 | -0.0014348 |
| Full | Hateful comments by audience members | -17 | 0.0163982  | 0.0217626 | -0.0410503 | 0.0738467  |
| Full | Hateful comments by audience members | -16 | -0.0204791 | 0.0255702 | -0.0879790 | 0.0470208  |
| Full | Hateful comments by audience members | -15 | 0.0262818  | 0.0126462 | -0.0071015 | 0.0596652  |
| Full | Hateful comments by audience members | -14 | -0.0097267 | 0.0162759 | -0.0526915 | 0.0332381  |
| Full | Hateful comments by audience members | -13 | 0.0173445  | 0.0235329 | -0.0447774 | 0.0794663  |
| Full | Hateful comments by audience members | -12 | -0.0129765 | 0.0557192 | -0.1600631 | 0.1341102  |
| Full | Hateful comments by audience members | -11 | 0.0040451  | 0.0307833 | -0.0772162 | 0.0853063  |
| Full | Hateful comments by audience members | -10 | -0.0009871 | 0.0278726 | -0.0745647 | 0.0725905  |
| Full | Hateful comments by audience members | -9  | -0.0301872 | 0.0166397 | -0.0741125 | 0.0137381  |
| Full | Hateful comments by audience members | -8  | 0.0190458  | 0.0249090 | -0.0467086 | 0.0848002  |
| Full | Hateful comments by audience members | -7  | -0.0592462 | 0.0209873 | -0.1146481 | -0.0038442 |
| Full | Hateful comments by audience members | -6  | -0.0361012 | 0.0311141 | -0.1182357 | 0.0460333  |
| Full | Hateful comments by audience members | -5  | -0.0134603 | 0.0169375 | -0.0581715 | 0.0312510  |
| Full | Hateful comments by audience members | -4  | -0.0025236 | 0.0258004 | -0.0706311 | 0.0655838  |
| Full | Hateful comments by audience members | -3  | -0.0900614 | 0.0553602 | -0.2362005 | 0.0560776  |
| Full | Hateful comments by audience members | -2  | 0.0354936  | 0.0220134 | -0.0226171 | 0.0936042  |
| Full | Hateful comments by audience members | -1  | 0.0661769  | 0.0134412 | 0.0306950  | 0.1016589  |
| Full | Hateful comments by audience members | 0   | 0.0162914  | 0.0251996 | -0.0502301 | 0.0828129  |
| Full | Hateful comments by audience members | 1   | -0.0106535 | 0.0340204 | -0.1004599 | 0.0791530  |
| Full | Hateful comments by audience members | 2   | 0.0017372  | 0.0286852 | -0.0739855 | 0.0774598  |
| Full | Hateful comments by audience members | 3   | 0.0143443  | 0.0370786 | -0.0835353 | 0.1122238  |
| Full | Hateful comments by audience members | 4   | -0.0136085 | 0.0478662 | -0.1399650 | 0.1127479  |
| Full | Hateful comments by audience members | 5   | 0.0024861  | 0.0632129 | -0.1643822 | 0.1693544  |
| Full | Hateful comments by audience members | 6   | 0.0343085  | 0.0502380 | -0.0983089 | 0.1669258  |
| Full | Hateful comments by audience members | 7   | 0.0654678  | 0.0588420 | -0.0898623 | 0.2207979  |
| Full | Hateful comments by audience members | 8   | 0.0375570  | 0.0578364 | -0.1151185 | 0.1902325  |
| Full | Hateful comments by audience members | 9   | 0.0322091  | 0.0655851 | -0.1409214 | 0.2053396  |
| Full | Hateful comments by audience members | 10  | 0.0504057  | 0.0753155 | -0.1484111 | 0.2492224  |
| Full | Hateful comments by audience members | 11  | 0.0502084  | 0.0856187 | -0.1758065 | 0.2762234  |
| Full | Hateful comments by audience members | 12  | 0.0328037  | 0.0734968 | -0.1612120 | 0.2268195  |
| Full | Hateful comments by audience members | 13  | 0.0494769  | 0.0902976 | -0.1888894 | 0.2878433  |
| Full | Hateful comments by audience members | 14  | 0.0088661  | 0.0947173 | -0.2411672 | 0.2588994  |
| Full | Hateful comments by audience members | 15  | 0.0833789  | 0.1502567 | -0.3132665 | 0.4800242  |

|      |                                      |    |            |           |            |            |
|------|--------------------------------------|----|------------|-----------|------------|------------|
| Full | Hateful comments by audience members | 16 | 0.0998287  | 0.1380260 | -0.2645302 | 0.4641876  |
| Full | Hateful comments by audience members | 17 | 0.0705463  | 0.1602287 | -0.3524230 | 0.4935156  |
| Full | Hateful comments by audience members | 18 | 0.1128811  | 0.1816424 | -0.3666158 | 0.5923779  |
| Full | Hateful comments by audience members | 19 | 0.0798956  | 0.1653868 | -0.3566899 | 0.5164810  |
| Full | Hateful comments by audience members | 20 | 0.0272490  | 0.0991360 | -0.2344488 | 0.2889468  |
| Full | Hateful comments by audience members | 21 | 0.0148190  | 0.1133256 | -0.2843363 | 0.3139743  |
| Full | Hateful comments by audience members | 22 | 0.0246225  | 0.1204369 | -0.2933051 | 0.3425500  |
| Full | Hateful comments by audience members | 23 | 0.0249335  | 0.1100105 | -0.2654706 | 0.3153377  |
| Full | Hateful comments by audience members | 24 | 0.0331024  | 0.1348728 | -0.3229328 | 0.3891375  |
| Full | Hateful comments by audience members | 25 | 0.0094066  | 0.1212039 | -0.3105457 | 0.3293588  |
| Full | Hateful comments by audience members | 26 | -0.0112037 | 0.1493094 | -0.4053483 | 0.3829409  |
| Full | Hateful comments by audience members | 27 | -0.1198417 | 0.0440153 | -0.2360326 | -0.0036507 |
| Full | Hateful comments by audience members | 28 | -0.1238937 | 0.0508635 | -0.2581624 | 0.0103751  |
| Full | Hateful comments by audience members | 29 | -0.1393241 | 0.1081745 | -0.4248815 | 0.1462333  |
| Full | Hateful comments by audience members | 30 | -0.1801308 | 0.0838176 | -0.4013911 | 0.0411295  |
| Full | Hateful comments by audience members | 31 | -0.2752484 | 0.0851717 | -0.5000832 | -0.0504135 |
| Full | Hateful comments by audience members | 32 | -0.2809500 | 0.1254654 | -0.6121517 | 0.0502516  |
| Full | Hateful comments by audience members | 33 | -0.2616922 | 0.1318727 | -0.6098078 | 0.0864233  |
| Full | Hateful comments by audience members | 34 | -0.1700056 | 0.1017325 | -0.4385574 | 0.0985462  |
| Full | Hateful comments by audience members | 35 | -0.1730453 | 0.1118454 | -0.4682931 | 0.1222026  |
| Full | Hateful comments by audience members | 36 | -0.1579059 | 0.0821135 | -0.3746678 | 0.0588561  |
| Full | Hateful comments by audience members | 37 | -0.1606739 | 0.0712056 | -0.3486412 | 0.0272935  |
| Full | Hateful comments by audience members | 38 | -0.1734523 | 0.0813608 | -0.3882272 | 0.0413226  |
| Full | Hateful comments by audience members | 39 | -0.2035068 | 0.0941167 | -0.4519545 | 0.0449409  |
| Full | Hateful comments by audience members | 40 | -0.2134549 | 0.1263964 | -0.5471142 | 0.1202043  |
| Full | Hateful comments by audience members | 41 | -0.2050517 | 0.0836439 | -0.4258536 | 0.0157502  |
| Full | Hateful comments by audience members | 42 | -0.1836797 | 0.1895377 | -0.6840185 | 0.3166590  |
| Full | Hateful comments by audience members | 43 | -0.5935582 | 0.2505702 | -1.2550095 | 0.0678931  |
| Full | Hateful comments by audience members | 44 | -0.5000005 | 0.0806940 | -0.7130153 | -0.2869857 |
| Full | Hateful comments by audience members | 45 | -0.5023091 | 0.3105522 | -1.3221000 | 0.3174818  |
| Full | Hateful comments by audience members | 47 | -0.2027695 | 0.0751855 | -0.4012430 | -0.0042960 |
| Full | Hateful comments by audience members | 48 | -0.2234378 | 0.0504649 | -0.3566543 | -0.0902213 |
| Full | Hateful comments by audience members | 49 | -0.2204675 | 0.0628252 | -0.3863125 | -0.0546225 |
| Full | Hateful comments by audience members | 50 | -0.2281463 | 0.0535596 | -0.3695320 | -0.0867606 |
| Full | Hateful comments by audience members | 51 | -0.2902804 | 0.1182973 | -0.6025598 | 0.0219991  |
| Full | Hateful comments by audience members | 52 | -0.3073004 | 0.1121148 | -0.6032595 | -0.0113414 |
| Full | Hateful comments by audience members | 53 | -0.3390438 | 0.2173228 | -0.9127292 | 0.2346416  |
| Full | Hateful comments by audience members | 54 | -0.3009670 | 0.1511025 | -0.6998452 | 0.0979112  |
| Full | Hateful comments by audience members | 55 | -0.2924927 | 0.1422043 | -0.6678815 | 0.0828961  |
| Full | Hateful comments by audience members | 56 | -0.5295451 | 0.0552206 | -0.6753156 | -0.3837745 |
| Full | Hateful comments by audience members | 57 | -0.4972795 | 0.3212537 | -1.3453202 | 0.3507612  |

|      |                                      |    |            |           |            |            |
|------|--------------------------------------|----|------------|-----------|------------|------------|
| Full | Hateful comments by audience members | 58 | -0.4970248 | 0.1089082 | -0.7845189 | -0.2095307 |
| Full | Hateful comments by audience members | 59 | -0.5249279 | 0.1935813 | -1.0359409 | -0.0139149 |

| sample | outcome                              | event.time | estimate   | std.error | conf.low   | conf.high  |
|--------|--------------------------------------|------------|------------|-----------|------------|------------|
| Most   | Hateful comments by audience members | -44        | 0.0250883  | 0.0311055 | -0.0562021 | 0.1063787  |
| Most   | Hateful comments by audience members | -43        | -0.0160001 | 0.0120189 | -0.0474101 | 0.0154099  |
| Most   | Hateful comments by audience members | -42        | 0.1026742  | 0.0196655 | 0.0512808  | 0.1540675  |
| Most   | Hateful comments by audience members | -41        | -0.0808828 | 0.0086588 | -0.1035114 | -0.0582542 |
| Most   | Hateful comments by audience members | -40        | 0.0375092  | 0.0127986 | 0.0040616  | 0.0709568  |
| Most   | Hateful comments by audience members | -39        | -0.0063729 | 0.0151514 | -0.0459692 | 0.0332234  |
| Most   | Hateful comments by audience members | -38        | -0.0325968 | 0.0207708 | -0.0868787 | 0.0216851  |
| Most   | Hateful comments by audience members | -37        | -0.0113633 | 0.0118318 | -0.0422842 | 0.0195575  |
| Most   | Hateful comments by audience members | -36        | 0.0844535  | 0.0455979 | -0.0347109 | 0.2036180  |
| Most   | Hateful comments by audience members | -35        | 0.0903191  | 0.0356882 | -0.0029473 | 0.1835856  |
| Most   | Hateful comments by audience members | -34        | 0.1278353  | 0.0311964 | 0.0463074  | 0.2093633  |
| Most   | Hateful comments by audience members | -33        | 0.1586207  | 0.0636189 | -0.0076391 | 0.3248805  |
| Most   | Hateful comments by audience members | -32        | 0.0199806  | 0.0488773 | -0.1077541 | 0.1477152  |
| Most   | Hateful comments by audience members | -31        | -0.0622387 | 0.0234966 | -0.1236440 | -0.0008333 |
| Most   | Hateful comments by audience members | -30        | 0.1356279  | 0.0524565 | -0.0014606 | 0.2727164  |
| Most   | Hateful comments by audience members | -29        | -0.0968641 | 0.0169266 | -0.1410997 | -0.0526284 |
| Most   | Hateful comments by audience members | -28        | -0.0362648 | 0.0148163 | -0.0749855 | 0.0024558  |
| Most   | Hateful comments by audience members | -27        | -0.0406273 | 0.0416349 | -0.1494349 | 0.0681803  |
| Most   | Hateful comments by audience members | -26        | -0.0478820 | 0.0161417 | -0.0900663 | -0.0056977 |
| Most   | Hateful comments by audience members | -25        | -0.0238690 | 0.0268618 | -0.0940688 | 0.0463308  |
| Most   | Hateful comments by audience members | -24        | -0.0361553 | 0.0359309 | -0.1300562 | 0.0577457  |
| Most   | Hateful comments by audience members | -23        | -0.0317922 | 0.0143582 | -0.0693154 | 0.0057311  |
| Most   | Hateful comments by audience members | -22        | 0.0309910  | 0.0283967 | -0.0432201 | 0.1052021  |
| Most   | Hateful comments by audience members | -21        | -0.0443101 | 0.0205701 | -0.0980675 | 0.0094473  |
| Most   | Hateful comments by audience members | -20        | 0.0425109  | 0.0230041 | -0.0176073 | 0.1026291  |
| Most   | Hateful comments by audience members | -19        | -0.0245461 | 0.0703882 | -0.2084967 | 0.1594046  |
| Most   | Hateful comments by audience members | -18        | -0.0218051 | 0.0404864 | -0.1276113 | 0.0840010  |
| Most   | Hateful comments by audience members | -17        | 0.0000094  | 0.0311569 | -0.0814150 | 0.0814339  |
| Most   | Hateful comments by audience members | -16        | -0.0387840 | 0.0256121 | -0.1057179 | 0.0281499  |
| Most   | Hateful comments by audience members | -15        | 0.0477632  | 0.0220058 | -0.0097461 | 0.1052725  |
| Most   | Hateful comments by audience members | -14        | 0.0059000  | 0.0128923 | -0.0277923 | 0.0395923  |
| Most   | Hateful comments by audience members | -13        | 0.0151205  | 0.0298434 | -0.0628713 | 0.0931123  |
| Most   | Hateful comments by audience members | -12        | 0.0067122  | 0.0176212 | -0.0393386 | 0.0527630  |
| Most   | Hateful comments by audience members | -11        | -0.0107359 | 0.0221589 | -0.0686454 | 0.0471736  |
| Most   | Hateful comments by audience members | -10        | 0.0156810  | 0.0216536 | -0.0409078 | 0.0722698  |
| Most   | Hateful comments by audience members | -9         | -0.0377002 | 0.0215845 | -0.0941087 | 0.0187082  |
| Most   | Hateful comments by audience members | -8         | -0.0149224 | 0.0219843 | -0.0723754 | 0.0425307  |

|      |                                      |    |            |           |            |            |
|------|--------------------------------------|----|------------|-----------|------------|------------|
| Most | Hateful comments by audience members | -7 | 0.0021329  | 0.0240005 | -0.0605895 | 0.0648552  |
| Most | Hateful comments by audience members | -6 | -0.0520261 | 0.0224514 | -0.1107000 | 0.0066478  |
| Most | Hateful comments by audience members | -5 | 0.0474771  | 0.0316549 | -0.0352491 | 0.1302032  |
| Most | Hateful comments by audience members | -4 | -0.0554731 | 0.0371439 | -0.1525440 | 0.0415978  |
| Most | Hateful comments by audience members | -3 | -0.0358980 | 0.0299421 | -0.1141479 | 0.0423519  |
| Most | Hateful comments by audience members | -2 | 0.0410507  | 0.0199111 | -0.0109846 | 0.0930859  |
| Most | Hateful comments by audience members | -1 | 0.0663288  | 0.0288965 | -0.0091886 | 0.1418463  |
| Most | Hateful comments by audience members | 0  | -0.0114617 | 0.0136782 | -0.0472080 | 0.0242845  |
| Most | Hateful comments by audience members | 1  | -0.0356416 | 0.0220815 | -0.0933488 | 0.0220656  |
| Most | Hateful comments by audience members | 2  | -0.0255516 | 0.0273958 | -0.0971471 | 0.0460439  |
| Most | Hateful comments by audience members | 3  | 0.0062244  | 0.0304934 | -0.0734664 | 0.0859151  |
| Most | Hateful comments by audience members | 4  | -0.0017493 | 0.0347117 | -0.0924640 | 0.0889655  |
| Most | Hateful comments by audience members | 5  | -0.0420040 | 0.0599796 | -0.1987532 | 0.1147451  |
| Most | Hateful comments by audience members | 6  | 0.0214053  | 0.0466675 | -0.1005543 | 0.1433648  |
| Most | Hateful comments by audience members | 7  | 0.0546723  | 0.0533612 | -0.0847804 | 0.1941251  |
| Most | Hateful comments by audience members | 8  | 0.0239478  | 0.0493155 | -0.1049320 | 0.1528277  |
| Most | Hateful comments by audience members | 9  | 0.0211940  | 0.0588327 | -0.1325578 | 0.1749458  |
| Most | Hateful comments by audience members | 10 | 0.0617594  | 0.0710976 | -0.1240451 | 0.2475639  |
| Most | Hateful comments by audience members | 11 | 0.0260549  | 0.0570939 | -0.1231529 | 0.1752627  |
| Most | Hateful comments by audience members | 12 | 0.0306149  | 0.0588841 | -0.1232713 | 0.1845011  |
| Most | Hateful comments by audience members | 13 | 0.0363679  | 0.0552537 | -0.1080307 | 0.1807666  |
| Most | Hateful comments by audience members | 14 | 0.0119134  | 0.0594684 | -0.1434998 | 0.1673266  |
| Most | Hateful comments by audience members | 15 | 0.0573137  | 0.1003097 | -0.2048330 | 0.3194603  |
| Most | Hateful comments by audience members | 16 | 0.1083429  | 0.1145877 | -0.1911176 | 0.4078034  |
| Most | Hateful comments by audience members | 17 | 0.0542516  | 0.1134935 | -0.2423492 | 0.3508523  |
| Most | Hateful comments by audience members | 18 | 0.0909360  | 0.1262687 | -0.2390513 | 0.4209233  |
| Most | Hateful comments by audience members | 19 | 0.0820625  | 0.1096730 | -0.2045540 | 0.3686791  |
| Most | Hateful comments by audience members | 20 | 0.0254264  | 0.0700255 | -0.1575764 | 0.2084293  |
| Most | Hateful comments by audience members | 21 | 0.0108856  | 0.0771077 | -0.1906256 | 0.2123967  |
| Most | Hateful comments by audience members | 22 | 0.0292323  | 0.0816630 | -0.1841835 | 0.2426481  |
| Most | Hateful comments by audience members | 23 | 0.0184579  | 0.0768072 | -0.1822680 | 0.2191838  |
| Most | Hateful comments by audience members | 24 | 0.0010986  | 0.0726286 | -0.1887071 | 0.1909042  |
| Most | Hateful comments by audience members | 25 | 0.0023952  | 0.0750659 | -0.1937801 | 0.1985704  |
| Most | Hateful comments by audience members | 26 | 0.0012311  | 0.0769876 | -0.1999663 | 0.2024285  |
| Most | Hateful comments by audience members | 27 | -0.0785030 | 0.0324234 | -0.1632373 | 0.0062313  |
| Most | Hateful comments by audience members | 28 | -0.0811228 | 0.0445276 | -0.1974900 | 0.0352444  |
| Most | Hateful comments by audience members | 29 | -0.1086834 | 0.0805853 | -0.3192828 | 0.1019160  |
| Most | Hateful comments by audience members | 30 | -0.1692593 | 0.0764796 | -0.3691290 | 0.0306104  |
| Most | Hateful comments by audience members | 31 | -0.2529974 | 0.0828850 | -0.4696069 | -0.0363880 |
| Most | Hateful comments by audience members | 32 | -0.2495483 | 0.0991767 | -0.5087340 | 0.0096374  |
| Most | Hateful comments by audience members | 33 | -0.2848869 | 0.1050232 | -0.5593519 | -0.0104220 |

|      |                                      |    |            |           |            |            |
|------|--------------------------------------|----|------------|-----------|------------|------------|
| Most | Hateful comments by audience members | 34 | -0.1760091 | 0.0821271 | -0.3906380 | 0.0386197  |
| Most | Hateful comments by audience members | 35 | -0.1735954 | 0.0834298 | -0.3916287 | 0.0444379  |
| Most | Hateful comments by audience members | 36 | -0.1587795 | 0.0644653 | -0.3272514 | 0.0096925  |
| Most | Hateful comments by audience members | 37 | -0.1535991 | 0.0756806 | -0.3513809 | 0.0441826  |
| Most | Hateful comments by audience members | 38 | -0.1260160 | 0.0779347 | -0.3296884 | 0.0776563  |
| Most | Hateful comments by audience members | 39 | -0.1837495 | 0.0854100 | -0.4069577 | 0.0394587  |
| Most | Hateful comments by audience members | 40 | -0.1796334 | 0.0902324 | -0.4154444 | 0.0561776  |
| Most | Hateful comments by audience members | 41 | -0.1899177 | 0.0779923 | -0.3937406 | 0.0139052  |
| Most | Hateful comments by audience members | 42 | -0.1503102 | 0.1364104 | -0.5068014 | 0.2061811  |
| Most | Hateful comments by audience members | 43 | -0.4822639 | 0.0511136 | -0.6158429 | -0.3486850 |
| Most | Hateful comments by audience members | 44 | -0.3397769 | 0.1036635 | -0.6106883 | -0.0688654 |
| Most | Hateful comments by audience members | 45 | -0.3617728 | 0.1514628 | -0.7576016 | 0.0340560  |
| Most | Hateful comments by audience members | 47 | -0.1463128 | 0.0192206 | -0.1965434 | -0.0960821 |
| Most | Hateful comments by audience members | 48 | -0.1774239 | 0.0129010 | -0.2111390 | -0.1437088 |
| Most | Hateful comments by audience members | 49 | -0.1796461 | 0.0152438 | -0.2194839 | -0.1398083 |
| Most | Hateful comments by audience members | 50 | -0.1790365 | 0.0136921 | -0.2148191 | -0.1432539 |
| Most | Hateful comments by audience members | 51 | -0.2953958 | 0.1568385 | -0.7052734 | 0.1144817  |
| Most | Hateful comments by audience members | 52 | -0.3095335 | 0.1581378 | -0.7228065 | 0.1037396  |
| Most | Hateful comments by audience members | 53 | -0.3290258 | 0.1502351 | -0.7216461 | 0.0635946  |
| Most | Hateful comments by audience members | 54 | -0.3381550 | 0.1670494 | -0.7747174 | 0.0984074  |
| Most | Hateful comments by audience members | 55 | -0.2930688 | 0.1751692 | -0.7508512 | 0.1647136  |
| Most | Hateful comments by audience members | 56 | -0.4459945 | 0.1937411 | -0.9523122 | 0.0603232  |
| Most | Hateful comments by audience members | 57 | -0.4470154 | 0.2011543 | -0.9727067 | 0.0786758  |
| Most | Hateful comments by audience members | 58 | -0.5185831 | 0.1220185 | -0.8374629 | -0.1997032 |
| Most | Hateful comments by audience members | 59 | -0.4732463 | 0.0833358 | -0.6910338 | -0.2554588 |

| sample | outcome                              | event.time | estimate   | std.error | conf.low   | conf.high  |
|--------|--------------------------------------|------------|------------|-----------|------------|------------|
| Middle | Hateful comments by audience members | -44        | -0.0001807 | 0.0147256 | -0.0372710 | 0.0369096  |
| Middle | Hateful comments by audience members | -43        | 0.0330385  | 0.0159566 | -0.0071524 | 0.0732295  |
| Middle | Hateful comments by audience members | -42        | -0.0409649 | 0.0192547 | -0.0894629 | 0.0075332  |
| Middle | Hateful comments by audience members | -41        | 0.0237969  | 0.0105481 | -0.0027713 | 0.0503651  |
| Middle | Hateful comments by audience members | -40        | 0.0218640  | 0.0135716 | -0.0123195 | 0.0560475  |
| Middle | Hateful comments by audience members | -39        | 0.0185350  | 0.0085804 | -0.0030769 | 0.0401469  |
| Middle | Hateful comments by audience members | -38        | -0.0284368 | 0.0095141 | -0.0524005 | -0.0044731 |
| Middle | Hateful comments by audience members | -37        | 0.0446024  | 0.0061400 | 0.0291371  | 0.0600676  |
| Middle | Hateful comments by audience members | -36        | -0.0597088 | 0.0081739 | -0.0802969 | -0.0391207 |
| Middle | Hateful comments by audience members | -35        | 0.0591149  | 0.0346912 | -0.0282639 | 0.1464938  |
| Middle | Hateful comments by audience members | -34        | 0.1812253  | 0.0228600 | 0.1236463  | 0.2388042  |
| Middle | Hateful comments by audience members | -33        | 0.1483295  | 0.0485509 | 0.0260413  | 0.2706176  |
| Middle | Hateful comments by audience members | -32        | -0.0065431 | 0.0428759 | -0.1145372 | 0.1014510  |
| Middle | Hateful comments by audience members | -31        | -0.0599881 | 0.0094997 | -0.0839157 | -0.0360606 |

|        |                                      |     |            |           |            |            |
|--------|--------------------------------------|-----|------------|-----------|------------|------------|
| Middle | Hateful comments by audience members | -30 | 0.0606312  | 0.0299170 | -0.0147225 | 0.1359849  |
| Middle | Hateful comments by audience members | -29 | -0.0155152 | 0.0137903 | -0.0502498 | 0.0192194  |
| Middle | Hateful comments by audience members | -28 | -0.0445731 | 0.0299546 | -0.1200214 | 0.0308753  |
| Middle | Hateful comments by audience members | -27 | 0.0213776  | 0.0169288 | -0.0212620 | 0.0640171  |
| Middle | Hateful comments by audience members | -26 | -0.0733735 | 0.0366815 | -0.1657655 | 0.0190184  |
| Middle | Hateful comments by audience members | -25 | 0.0106646  | 0.0124518 | -0.0206985 | 0.0420277  |
| Middle | Hateful comments by audience members | -24 | -0.0445655 | 0.0203882 | -0.0959184 | 0.0067874  |
| Middle | Hateful comments by audience members | -23 | -0.0078273 | 0.0084429 | -0.0290930 | 0.0134384  |
| Middle | Hateful comments by audience members | -22 | 0.0129282  | 0.0109864 | -0.0147439 | 0.0406004  |
| Middle | Hateful comments by audience members | -21 | 0.0112550  | 0.0203586 | -0.0400234 | 0.0625333  |
| Middle | Hateful comments by audience members | -20 | -0.0255289 | 0.0189979 | -0.0733801 | 0.0223223  |
| Middle | Hateful comments by audience members | -19 | 0.0652590  | 0.0485837 | -0.0571117 | 0.1876296  |
| Middle | Hateful comments by audience members | -18 | -0.0184540 | 0.0294019 | -0.0925103 | 0.0556023  |
| Middle | Hateful comments by audience members | -17 | 0.0247499  | 0.0183616 | -0.0214986 | 0.0709983  |
| Middle | Hateful comments by audience members | -16 | -0.0101177 | 0.0189738 | -0.0579082 | 0.0376728  |
| Middle | Hateful comments by audience members | -15 | 0.0078634  | 0.0260844 | -0.0578370 | 0.0735638  |
| Middle | Hateful comments by audience members | -14 | -0.0011105 | 0.0115002 | -0.0300768 | 0.0278557  |
| Middle | Hateful comments by audience members | -13 | -0.0083598 | 0.0197614 | -0.0581340 | 0.0414145  |
| Middle | Hateful comments by audience members | -12 | -0.0084054 | 0.0362942 | -0.0998217 | 0.0830110  |
| Middle | Hateful comments by audience members | -11 | 0.0249789  | 0.0191362 | -0.0232207 | 0.0731784  |
| Middle | Hateful comments by audience members | -10 | -0.0181414 | 0.0185900 | -0.0649652 | 0.0286823  |
| Middle | Hateful comments by audience members | -9  | -0.0283298 | 0.0112661 | -0.0567063 | 0.0000467  |
| Middle | Hateful comments by audience members | -8  | 0.0286497  | 0.0177550 | -0.0160708 | 0.0733702  |
| Middle | Hateful comments by audience members | -7  | -0.0709128 | 0.0233475 | -0.1297195 | -0.0121061 |
| Middle | Hateful comments by audience members | -6  | -0.0373925 | 0.0178751 | -0.0824155 | 0.0076305  |
| Middle | Hateful comments by audience members | -5  | -0.0240664 | 0.0217379 | -0.0788190 | 0.0306862  |
| Middle | Hateful comments by audience members | -4  | 0.0252766  | 0.0222332 | -0.0307235 | 0.0812766  |
| Middle | Hateful comments by audience members | -3  | -0.0749457 | 0.0297339 | -0.1498382 | -0.0000532 |
| Middle | Hateful comments by audience members | -2  | 0.0284187  | 0.0178792 | -0.0166148 | 0.0734522  |
| Middle | Hateful comments by audience members | -1  | 0.0751852  | 0.0305704 | -0.0018144 | 0.1521847  |
| Middle | Hateful comments by audience members | 0   | 0.0150908  | 0.0153391 | -0.0235447 | 0.0537263  |
| Middle | Hateful comments by audience members | 1   | 0.0056819  | 0.0206121 | -0.0462349 | 0.0575987  |
| Middle | Hateful comments by audience members | 2   | -0.0122609 | 0.0419128 | -0.1178290 | 0.0933073  |
| Middle | Hateful comments by audience members | 3   | -0.0083142 | 0.0393309 | -0.1073793 | 0.0907509  |
| Middle | Hateful comments by audience members | 4   | -0.0345676 | 0.0435983 | -0.1443814 | 0.0752461  |
| Middle | Hateful comments by audience members | 5   | 0.0140266  | 0.0519962 | -0.1169394 | 0.1449926  |
| Middle | Hateful comments by audience members | 6   | -0.0089321 | 0.0511400 | -0.1377414 | 0.1198772  |
| Middle | Hateful comments by audience members | 7   | 0.0667489  | 0.0535127 | -0.0680367 | 0.2015345  |
| Middle | Hateful comments by audience members | 8   | 0.0263769  | 0.0474819 | -0.0932187 | 0.1459725  |
| Middle | Hateful comments by audience members | 9   | 0.0178979  | 0.0525569 | -0.1144802 | 0.1502761  |
| Middle | Hateful comments by audience members | 10  | 0.0182327  | 0.0476506 | -0.1017878 | 0.1382532  |

|        |                                      |    |            |           |            |            |
|--------|--------------------------------------|----|------------|-----------|------------|------------|
| Middle | Hateful comments by audience members | 11 | 0.0213746  | 0.0694744 | -0.1536147 | 0.1963639  |
| Middle | Hateful comments by audience members | 12 | 0.0115245  | 0.0602880 | -0.1403266 | 0.1633755  |
| Middle | Hateful comments by audience members | 13 | -0.0156960 | 0.0585153 | -0.1630819 | 0.1316899  |
| Middle | Hateful comments by audience members | 14 | -0.0049195 | 0.0644540 | -0.1672637 | 0.1574247  |
| Middle | Hateful comments by audience members | 15 | 0.0412233  | 0.1140167 | -0.2459573 | 0.3284039  |
| Middle | Hateful comments by audience members | 16 | 0.0272209  | 0.0891758 | -0.1973916 | 0.2518334  |
| Middle | Hateful comments by audience members | 17 | 0.0289073  | 0.1237899 | -0.2828897 | 0.3407043  |
| Middle | Hateful comments by audience members | 18 | 0.0697929  | 0.1195362 | -0.2312902 | 0.3708759  |
| Middle | Hateful comments by audience members | 19 | 0.0349560  | 0.1026048 | -0.2234808 | 0.2933927  |
| Middle | Hateful comments by audience members | 20 | 0.0044446  | 0.0795115 | -0.1958257 | 0.2047149  |
| Middle | Hateful comments by audience members | 21 | -0.0007059 | 0.0792690 | -0.2003655 | 0.1989536  |
| Middle | Hateful comments by audience members | 22 | -0.0176232 | 0.0915488 | -0.2482125 | 0.2129661  |
| Middle | Hateful comments by audience members | 23 | -0.0031363 | 0.0680686 | -0.1745849 | 0.1683122  |
| Middle | Hateful comments by audience members | 24 | 0.0061132  | 0.0895336 | -0.2194005 | 0.2316269  |
| Middle | Hateful comments by audience members | 25 | -0.0007297 | 0.0812660 | -0.2054192 | 0.2039598  |
| Middle | Hateful comments by audience members | 26 | -0.0389385 | 0.0740169 | -0.2253692 | 0.1474922  |
| Middle | Hateful comments by audience members | 27 | -0.0926731 | 0.0353098 | -0.1816100 | -0.0037363 |
| Middle | Hateful comments by audience members | 28 | -0.0997090 | 0.0330351 | -0.1829166 | -0.0165015 |
| Middle | Hateful comments by audience members | 29 | -0.1296378 | 0.0796306 | -0.3302080 | 0.0709324  |
| Middle | Hateful comments by audience members | 30 | -0.1640863 | 0.0652958 | -0.3285508 | 0.0003781  |
| Middle | Hateful comments by audience members | 31 | -0.2167509 | 0.1001962 | -0.4691210 | 0.0356191  |
| Middle | Hateful comments by audience members | 32 | -0.2475048 | 0.0983791 | -0.4952980 | 0.0002884  |
| Middle | Hateful comments by audience members | 33 | -0.2169685 | 0.0940374 | -0.4538262 | 0.0198892  |
| Middle | Hateful comments by audience members | 34 | -0.1046012 | 0.0933632 | -0.3397608 | 0.1305583  |
| Middle | Hateful comments by audience members | 35 | -0.0991953 | 0.0943010 | -0.3367169 | 0.1383263  |
| Middle | Hateful comments by audience members | 36 | -0.0991905 | 0.0597881 | -0.2497823 | 0.0514014  |
| Middle | Hateful comments by audience members | 37 | -0.1054094 | 0.0736432 | -0.2908988 | 0.0800801  |
| Middle | Hateful comments by audience members | 38 | -0.1405509 | 0.0774711 | -0.3356819 | 0.0545802  |
| Middle | Hateful comments by audience members | 39 | -0.1503078 | 0.1016883 | -0.4064363 | 0.1058207  |
| Middle | Hateful comments by audience members | 40 | -0.1555736 | 0.0862686 | -0.3728636 | 0.0617163  |
| Middle | Hateful comments by audience members | 41 | -0.1362152 | 0.0863629 | -0.3537426 | 0.0813121  |
| Middle | Hateful comments by audience members | 42 | -0.1169624 | 0.2024877 | -0.6269803 | 0.3930554  |
| Middle | Hateful comments by audience members | 43 | -0.5816612 | 0.0283589 | -0.6530905 | -0.5102319 |
| Middle | Hateful comments by audience members | 44 | -0.5499780 | 0.1562455 | -0.9435230 | -0.1564330 |
| Middle | Hateful comments by audience members | 45 | -0.4998377 | 0.0205498 | -0.5515976 | -0.4480778 |
| Middle | Hateful comments by audience members | 47 | -0.1617567 | 0.0342386 | -0.2479956 | -0.0755178 |
| Middle | Hateful comments by audience members | 48 | -0.1549347 | 0.0224787 | -0.2115532 | -0.0983161 |
| Middle | Hateful comments by audience members | 49 | -0.1719898 | 0.0264632 | -0.2386444 | -0.1053353 |
| Middle | Hateful comments by audience members | 50 | -0.1589333 | 0.0238472 | -0.2189988 | -0.0988678 |
| Middle | Hateful comments by audience members | 51 | -0.2328927 | 0.1266573 | -0.5519119 | 0.0861266  |
| Middle | Hateful comments by audience members | 52 | -0.2487937 | 0.1272806 | -0.5693830 | 0.0717956  |

|        |                                      |    |            |           |            |            |
|--------|--------------------------------------|----|------------|-----------|------------|------------|
| Middle | Hateful comments by audience members | 53 | -0.2835277 | 0.1150222 | -0.5732409 | 0.0061855  |
| Middle | Hateful comments by audience members | 54 | -0.2581319 | 0.0824225 | -0.4657344 | -0.0505294 |
| Middle | Hateful comments by audience members | 55 | -0.2590417 | 0.1184830 | -0.5574719 | 0.0393886  |
| Middle | Hateful comments by audience members | 56 | -0.4826513 | 0.4846808 | -1.7034457 | 0.7381432  |
| Middle | Hateful comments by audience members | 57 | -0.4427806 | 0.1308736 | -0.7724196 | -0.1131415 |
| Middle | Hateful comments by audience members | 58 | -0.4324367 | 0.2109955 | -0.9638838 | 0.0990103  |
| Middle | Hateful comments by audience members | 59 | -0.5730308 | 0.0645516 | -0.7356208 | -0.4104408 |

| sample | outcome                              | event.time | estimate   | std.error | conf.low   | conf.high  |
|--------|--------------------------------------|------------|------------|-----------|------------|------------|
| Least  | Hateful comments by audience members | -44        | 0.0146029  | 0.0249282 | -0.0480020 | 0.0772079  |
| Least  | Hateful comments by audience members | -43        | 0.0409653  | 0.0283331 | -0.0301907 | 0.1121212  |
| Least  | Hateful comments by audience members | -42        | 0.0034144  | 0.0503574 | -0.1230538 | 0.1298825  |
| Least  | Hateful comments by audience members | -41        | -0.0274954 | 0.0417911 | -0.1324500 | 0.0774592  |
| Least  | Hateful comments by audience members | -40        | 0.0238214  | 0.0334402 | -0.0601608 | 0.1078035  |
| Least  | Hateful comments by audience members | -39        | -0.0611489 | 0.0168030 | -0.1033481 | -0.0189496 |
| Least  | Hateful comments by audience members | -38        | 0.0606789  | 0.0540075 | -0.0749562 | 0.1963139  |
| Least  | Hateful comments by audience members | -37        | 0.0257126  | 0.0136385 | -0.0085392 | 0.0599644  |
| Least  | Hateful comments by audience members | -36        | -0.0602690 | 0.0275034 | -0.1293414 | 0.0088034  |
| Least  | Hateful comments by audience members | -35        | 0.0310871  | 0.0403448 | -0.0702352 | 0.1324094  |
| Least  | Hateful comments by audience members | -34        | 0.1161614  | 0.0498924 | -0.0091390 | 0.2414618  |
| Least  | Hateful comments by audience members | -33        | 0.1872824  | 0.0819560 | -0.0185427 | 0.3931076  |
| Least  | Hateful comments by audience members | -32        | 0.0571887  | 0.0542591 | -0.0790783 | 0.1934557  |
| Least  | Hateful comments by audience members | -31        | -0.0132882 | 0.0215147 | -0.0673204 | 0.0407441  |
| Least  | Hateful comments by audience members | -30        | 0.0957489  | 0.0701157 | -0.0803406 | 0.2718384  |
| Least  | Hateful comments by audience members | -29        | 0.0259938  | 0.0277199 | -0.0436222 | 0.0956098  |
| Least  | Hateful comments by audience members | -28        | -0.0383603 | 0.0382242 | -0.1343570 | 0.0576364  |
| Least  | Hateful comments by audience members | -27        | 0.0428855  | 0.0902410 | -0.1837468 | 0.2695177  |
| Least  | Hateful comments by audience members | -26        | 0.0071172  | 0.0224991 | -0.0493873 | 0.0636218  |
| Least  | Hateful comments by audience members | -25        | 0.0165187  | 0.0301868 | -0.0592928 | 0.0923302  |
| Least  | Hateful comments by audience members | -24        | -0.1255719 | 0.0372098 | -0.2190210 | -0.0321227 |
| Least  | Hateful comments by audience members | -23        | -0.0080872 | 0.0357094 | -0.0977683 | 0.0815939  |
| Least  | Hateful comments by audience members | -22        | 0.0388190  | 0.0332650 | -0.0447231 | 0.1223612  |
| Least  | Hateful comments by audience members | -21        | 0.0901986  | 0.0594991 | -0.0592282 | 0.2396253  |
| Least  | Hateful comments by audience members | -20        | -0.0815107 | 0.0634082 | -0.2407549 | 0.0777335  |
| Least  | Hateful comments by audience members | -19        | 0.0936553  | 0.0297737 | 0.0188813  | 0.1684294  |
| Least  | Hateful comments by audience members | -18        | -0.0855986 | 0.0337384 | -0.1703295 | -0.0008677 |
| Least  | Hateful comments by audience members | -17        | 0.0096125  | 0.0294211 | -0.0642761 | 0.0835011  |
| Least  | Hateful comments by audience members | -16        | -0.0091719 | 0.0341515 | -0.0949403 | 0.0765965  |
| Least  | Hateful comments by audience members | -15        | 0.0339423  | 0.0211908 | -0.0192765 | 0.0871610  |
| Least  | Hateful comments by audience members | -14        | -0.0300622 | 0.0300359 | -0.1054947 | 0.0453702  |
| Least  | Hateful comments by audience members | -13        | 0.0277895  | 0.0471949 | -0.0907364 | 0.1463154  |



|       |                                      |     |            |           |            |           |
|-------|--------------------------------------|-----|------------|-----------|------------|-----------|
| Least | Hateful comments by audience members | -12 | -0.0362631 | 0.0253172 | -0.0998450 | 0.0273187 |
| Least | Hateful comments by audience members | -11 | -0.0233620 | 0.0255195 | -0.0874520 | 0.0407281 |
| Least | Hateful comments by audience members | -10 | -0.0124127 | 0.0367429 | -0.1046892 | 0.0798638 |
| Least | Hateful comments by audience members | -9  | -0.0271065 | 0.0227943 | -0.0843524 | 0.0301394 |
| Least | Hateful comments by audience members | -8  | 0.0448944  | 0.0266805 | -0.0221115 | 0.1119002 |
| Least | Hateful comments by audience members | -7  | -0.0784656 | 0.0412420 | -0.1820413 | 0.0251102 |
| Least | Hateful comments by audience members | -6  | -0.0090592 | 0.0442221 | -0.1201192 | 0.1020007 |
| Least | Hateful comments by audience members | -5  | -0.0378847 | 0.0250385 | -0.1007666 | 0.0249972 |
| Least | Hateful comments by audience members | -4  | -0.0066742 | 0.0315166 | -0.0858255 | 0.0724770 |
| Least | Hateful comments by audience members | -3  | -0.1356724 | 0.0584558 | -0.2824790 | 0.0111343 |
| Least | Hateful comments by audience members | -2  | 0.0458654  | 0.0486973 | -0.0764336 | 0.1681644 |
| Least | Hateful comments by audience members | -1  | 0.0539775  | 0.0336661 | -0.0305719 | 0.1385269 |
| Least | Hateful comments by audience members | 0   | 0.0246166  | 0.0706082 | -0.1527097 | 0.2019429 |
| Least | Hateful comments by audience members | 1   | -0.0162422 | 0.0319375 | -0.0964505 | 0.0639660 |
| Least | Hateful comments by audience members | 2   | 0.0213235  | 0.0545681 | -0.1157195 | 0.1583665 |
| Least | Hateful comments by audience members | 3   | 0.0168240  | 0.0702632 | -0.1596359 | 0.1932839 |
| Least | Hateful comments by audience members | 4   | -0.0327274 | 0.0605483 | -0.1847891 | 0.1193343 |
| Least | Hateful comments by audience members | 5   | -0.0342468 | 0.0620110 | -0.1899820 | 0.1214885 |
| Least | Hateful comments by audience members | 6   | 0.0526516  | 0.0811664 | -0.1511907 | 0.2564938 |
| Least | Hateful comments by audience members | 7   | 0.0368708  | 0.0986283 | -0.2108254 | 0.2845671 |
| Least | Hateful comments by audience members | 8   | 0.0186113  | 0.0741933 | -0.1677185 | 0.2049412 |
| Least | Hateful comments by audience members | 9   | 0.0097930  | 0.1171873 | -0.2845126 | 0.3040987 |
| Least | Hateful comments by audience members | 10  | 0.0226939  | 0.1172625 | -0.2718005 | 0.3171882 |
| Least | Hateful comments by audience members | 11  | 0.0219906  | 0.0819427 | -0.1838013 | 0.2277824 |
| Least | Hateful comments by audience members | 12  | -0.0049196 | 0.1112803 | -0.2843902 | 0.2745510 |
| Least | Hateful comments by audience members | 13  | 0.0499827  | 0.0988566 | -0.1982869 | 0.2982524 |
| Least | Hateful comments by audience members | 14  | -0.0585465 | 0.0931247 | -0.2924210 | 0.1753279 |
| Least | Hateful comments by audience members | 15  | 0.0232744  | 0.1711814 | -0.4066327 | 0.4531814 |
| Least | Hateful comments by audience members | 16  | 0.0536859  | 0.1872023 | -0.4164561 | 0.5238279 |
| Least | Hateful comments by audience members | 17  | -0.0058981 | 0.1754311 | -0.4464779 | 0.4346816 |
| Least | Hateful comments by audience members | 18  | 0.0247562  | 0.1626061 | -0.3836146 | 0.4331271 |
| Least | Hateful comments by audience members | 19  | -0.0110728 | 0.1484535 | -0.3839008 | 0.3617551 |
| Least | Hateful comments by audience members | 20  | -0.0330608 | 0.1135000 | -0.3181061 | 0.2519844 |
| Least | Hateful comments by audience members | 21  | -0.0609651 | 0.1066035 | -0.3286903 | 0.2067601 |
| Least | Hateful comments by audience members | 22  | -0.0314759 | 0.1215706 | -0.3367898 | 0.2738380 |
| Least | Hateful comments by audience members | 23  | -0.0415586 | 0.1135122 | -0.3266346 | 0.2435174 |
| Least | Hateful comments by audience members | 24  | -0.0299897 | 0.1249896 | -0.3438901 | 0.2839106 |
| Least | Hateful comments by audience members | 25  | -0.0778398 | 0.1462784 | -0.4452050 | 0.2895254 |
| Least | Hateful comments by audience members | 26  | -0.0763170 | 0.1279645 | -0.3976886 | 0.2450546 |
| Least | Hateful comments by audience members | 27  | -0.1956232 | 0.0931600 | -0.4295863 | 0.0383398 |
| Least | Hateful comments by audience members | 28  | -0.2041519 | 0.1026114 | -0.4618514 | 0.0535476 |

|       |                                      |    |            |           |            |            |
|-------|--------------------------------------|----|------------|-----------|------------|------------|
| Least | Hateful comments by audience members | 29 | -0.2195950 | 0.1847227 | -0.6835096 | 0.2443197  |
| Least | Hateful comments by audience members | 30 | -0.2449919 | 0.2569857 | -0.8903887 | 0.4004049  |
| Least | Hateful comments by audience members | 31 | -0.3559552 | 0.3106833 | -1.1362089 | 0.4242985  |
| Least | Hateful comments by audience members | 32 | -0.3373438 | 0.3102749 | -1.1165718 | 0.4418843  |
| Least | Hateful comments by audience members | 33 | -0.3013327 | 0.3068768 | -1.0720266 | 0.4693612  |
| Least | Hateful comments by audience members | 34 | -0.2483537 | 0.1690121 | -0.6728128 | 0.1761054  |
| Least | Hateful comments by audience members | 35 | -0.2654810 | 0.2169692 | -0.8103800 | 0.2794181  |
| Least | Hateful comments by audience members | 36 | -0.2311201 | 0.1596474 | -0.6320604 | 0.1698202  |
| Least | Hateful comments by audience members | 37 | -0.2346192 | 0.1921551 | -0.7171999 | 0.2479615  |
| Least | Hateful comments by audience members | 38 | -0.2450296 | 0.1517717 | -0.6261908 | 0.1361317  |
| Least | Hateful comments by audience members | 39 | -0.2829418 | 0.1910731 | -0.7628051 | 0.1969214  |
| Least | Hateful comments by audience members | 40 | -0.3077383 | 0.1679075 | -0.7294231 | 0.1139465  |
| Least | Hateful comments by audience members | 41 | -0.3011866 | 0.1787304 | -0.7500521 | 0.1476789  |
| Least | Hateful comments by audience members | 42 | -0.3084270 | 0.3917224 | -1.2922033 | 0.6753492  |
| Least | Hateful comments by audience members | 43 | -0.7430775 | 1.7954937 | -5.2523014 | 3.7661463  |
| Least | Hateful comments by audience members | 44 | -0.6117798 | 0.9091085 | -2.8949256 | 1.6713660  |
| Least | Hateful comments by audience members | 45 | -0.6717597 | 0.7234499 | -2.4886404 | 1.1451210  |
| Least | Hateful comments by audience members | 47 | -0.2714182 | 0.0300703 | -0.3469369 | -0.1958994 |
| Least | Hateful comments by audience members | 48 | -0.3178067 | 0.0193064 | -0.3662930 | -0.2693204 |
| Least | Hateful comments by audience members | 49 | -0.2907208 | 0.0240351 | -0.3510827 | -0.2303588 |
| Least | Hateful comments by audience members | 50 | -0.3245939 | 0.0204818 | -0.3760320 | -0.2731557 |
| Least | Hateful comments by audience members | 51 | -0.3546705 | 0.2423370 | -0.9632784 | 0.2539374  |
| Least | Hateful comments by audience members | 52 | -0.3745826 | 0.2713272 | -1.0559968 | 0.3068316  |
| Least | Hateful comments by audience members | 53 | -0.4095468 | 0.2376176 | -1.0063025 | 0.1872089  |
| Least | Hateful comments by audience members | 54 | -0.3307174 | 0.2669276 | -1.0010825 | 0.3396477  |
| Least | Hateful comments by audience members | 55 | -0.3313455 | 0.3099197 | -1.1096816 | 0.4469906  |
| Least | Hateful comments by audience members | 56 | -0.7003294 | 0.9516695 | -3.0903634 | 1.6897046  |
| Least | Hateful comments by audience members | 57 | -0.6405585 | 1.2726655 | -3.8367456 | 2.5556286  |
| Least | Hateful comments by audience members | 58 | -0.5712093 | 0.3977025 | -1.5700040 | 0.4275853  |
| Least | Hateful comments by audience members | 59 | -0.5116673 | 1.0194407 | -3.0719026 | 2.0485679  |

## Hateful comments/total comments

Average effect by length of exposure (Callaway and Sant'Anna)

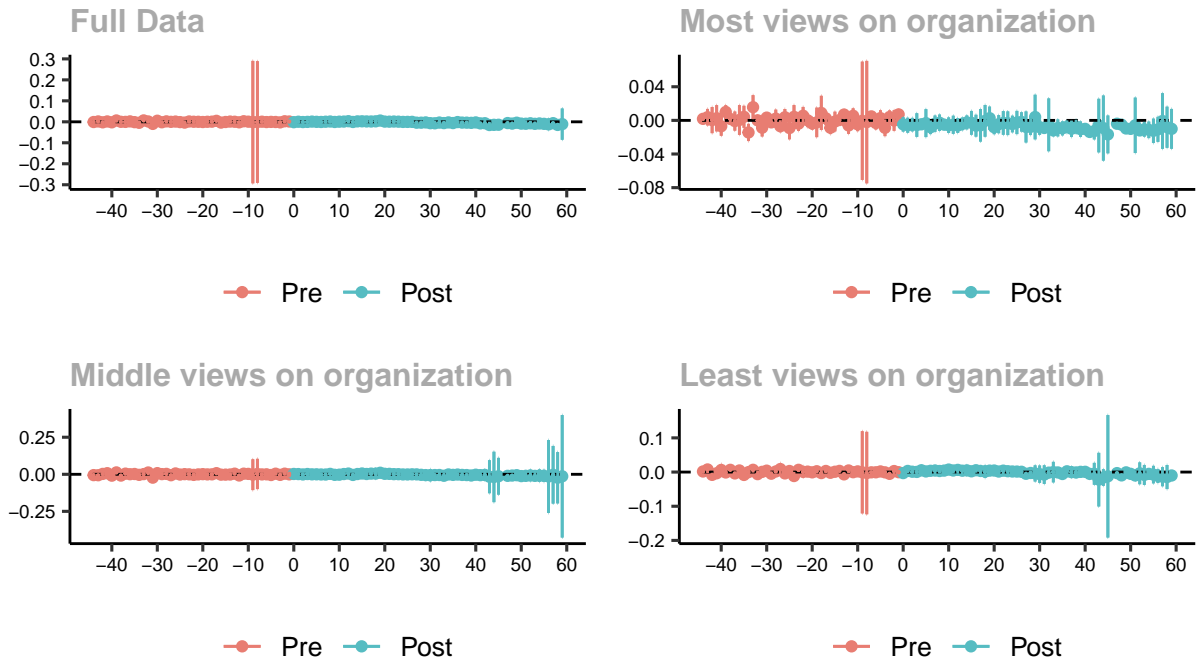

Long timeframe with sampled control groups

| sample | outcome                         | event.time | estimate   | std.error | conf.low   | conf.high  |
|--------|---------------------------------|------------|------------|-----------|------------|------------|
| Full   | Hateful comments/total comments | -44        | -0.0009911 | 0.0013172 | -0.0043239 | 0.0023418  |
| Full   | Hateful comments/total comments | -43        | 0.0017685  | 0.0011435 | -0.0011248 | 0.0046618  |
| Full   | Hateful comments/total comments | -42        | -0.0023581 | 0.0021639 | -0.0078333 | 0.0031171  |
| Full   | Hateful comments/total comments | -41        | 0.0018433  | 0.0025980 | -0.0047304 | 0.0084170  |
| Full   | Hateful comments/total comments | -40        | -0.0024293 | 0.0047824 | -0.0145303 | 0.0096716  |
| Full   | Hateful comments/total comments | -39        | 0.0064123  | 0.0035782 | -0.0026416 | 0.0154663  |
| Full   | Hateful comments/total comments | -38        | -0.0000009 | 0.0009310 | -0.0023567 | 0.0023548  |
| Full   | Hateful comments/total comments | -37        | -0.0003392 | 0.0030230 | -0.0079882 | 0.0073098  |
| Full   | Hateful comments/total comments | -36        | 0.0021237  | 0.0014839 | -0.0016311 | 0.0058784  |
| Full   | Hateful comments/total comments | -35        | -0.0015847 | 0.0019727 | -0.0065762 | 0.0034068  |
| Full   | Hateful comments/total comments | -34        | -0.0047118 | 0.0037188 | -0.0141212 | 0.0046977  |
| Full   | Hateful comments/total comments | -33        | 0.0066978  | 0.0028477 | -0.0005077 | 0.0139032  |
| Full   | Hateful comments/total comments | -32        | 0.0016662  | 0.0019677 | -0.0033127 | 0.0066450  |
| Full   | Hateful comments/total comments | -31        | -0.0098742 | 0.0029812 | -0.0174174 | -0.0023310 |
| Full   | Hateful comments/total comments | -30        | 0.0051843  | 0.0029125 | -0.0021851 | 0.0125538  |
| Full   | Hateful comments/total comments | -29        | -0.0020647 | 0.0013028 | -0.0053611 | 0.0012318  |
| Full   | Hateful comments/total comments | -28        | 0.0021444  | 0.0010179 | -0.0004312 | 0.0047201  |
| Full   | Hateful comments/total comments | -27        | -0.0000453 | 0.0026182 | -0.0066700 | 0.0065793  |
| Full   | Hateful comments/total comments | -26        | 0.0011844  | 0.0021627 | -0.0042878 | 0.0066567  |

|      |                                 |     |            |           |            |            |
|------|---------------------------------|-----|------------|-----------|------------|------------|
| Full | Hateful comments/total comments | -25 | -0.0014192 | 0.0020127 | -0.0065120 | 0.0036736  |
| Full | Hateful comments/total comments | -24 | -0.0035958 | 0.0009522 | -0.0060051 | -0.0011865 |
| Full | Hateful comments/total comments | -23 | 0.0016587  | 0.0024008 | -0.0044160 | 0.0077335  |
| Full | Hateful comments/total comments | -22 | 0.0003503  | 0.0033941 | -0.0082378 | 0.0089384  |
| Full | Hateful comments/total comments | -21 | 0.0002220  | 0.0029376 | -0.0072108 | 0.0076549  |
| Full | Hateful comments/total comments | -20 | -0.0009215 | 0.0022830 | -0.0066981 | 0.0048550  |
| Full | Hateful comments/total comments | -19 | 0.0001890  | 0.0014258 | -0.0034187 | 0.0037966  |
| Full | Hateful comments/total comments | -18 | 0.0007121  | 0.0019595 | -0.0042461 | 0.0056703  |
| Full | Hateful comments/total comments | -17 | 0.0046215  | 0.0023139 | -0.0012332 | 0.0104763  |
| Full | Hateful comments/total comments | -16 | -0.0036867 | 0.0021987 | -0.0092499 | 0.0018765  |
| Full | Hateful comments/total comments | -15 | -0.0008870 | 0.0019937 | -0.0059317 | 0.0041578  |
| Full | Hateful comments/total comments | -14 | 0.0011388  | 0.0013595 | -0.0023011 | 0.0045788  |
| Full | Hateful comments/total comments | -13 | 0.0003100  | 0.0012252 | -0.0027900 | 0.0034101  |
| Full | Hateful comments/total comments | -12 | -0.0024041 | 0.0007447 | -0.0042883 | -0.0005199 |
| Full | Hateful comments/total comments | -11 | 0.0026959  | 0.0007547 | 0.0007862  | 0.0046056  |
| Full | Hateful comments/total comments | -10 | 0.0006527  | 0.0021705 | -0.0048393 | 0.0061447  |
| Full | Hateful comments/total comments | -9  | -0.0013126 | 0.1153300 | -0.2931299 | 0.2905046  |
| Full | Hateful comments/total comments | -8  | -0.0009732 | 0.1145743 | -0.2908784 | 0.2889321  |
| Full | Hateful comments/total comments | -7  | 0.0005221  | 0.0011725 | -0.0024446 | 0.0034889  |
| Full | Hateful comments/total comments | -6  | -0.0011703 | 0.0017372 | -0.0055658 | 0.0032252  |
| Full | Hateful comments/total comments | -5  | -0.0003223 | 0.0009435 | -0.0027095 | 0.0020649  |
| Full | Hateful comments/total comments | -4  | -0.0008225 | 0.0014905 | -0.0045938 | 0.0029488  |
| Full | Hateful comments/total comments | -3  | -0.0026484 | 0.0026689 | -0.0094014 | 0.0041047  |
| Full | Hateful comments/total comments | -2  | 0.0025920  | 0.0030424 | -0.0051061 | 0.0102902  |
| Full | Hateful comments/total comments | -1  | 0.0014154  | 0.0012342 | -0.0017074 | 0.0045382  |
| Full | Hateful comments/total comments | 0   | -0.0016867 | 0.0027537 | -0.0086543 | 0.0052810  |
| Full | Hateful comments/total comments | 1   | 0.0003726  | 0.0014366 | -0.0032623 | 0.0040075  |
| Full | Hateful comments/total comments | 2   | -0.0011146 | 0.0017013 | -0.0054195 | 0.0031903  |
| Full | Hateful comments/total comments | 3   | -0.0003421 | 0.0020650 | -0.0055671 | 0.0048829  |
| Full | Hateful comments/total comments | 4   | 0.0010788  | 0.0015686 | -0.0028901 | 0.0050477  |
| Full | Hateful comments/total comments | 5   | -0.0000886 | 0.0026356 | -0.0067574 | 0.0065803  |
| Full | Hateful comments/total comments | 6   | -0.0007524 | 0.0014991 | -0.0045456 | 0.0030409  |
| Full | Hateful comments/total comments | 7   | 0.0003842  | 0.0017399 | -0.0040182 | 0.0047865  |
| Full | Hateful comments/total comments | 8   | 0.0014699  | 0.0025623 | -0.0050135 | 0.0079533  |
| Full | Hateful comments/total comments | 9   | -0.0006827 | 0.0018301 | -0.0053133 | 0.0039478  |
| Full | Hateful comments/total comments | 10  | 0.0006649  | 0.0021658 | -0.0048152 | 0.0061449  |
| Full | Hateful comments/total comments | 11  | 0.0011178  | 0.0025787 | -0.0054069 | 0.0076426  |
| Full | Hateful comments/total comments | 12  | 0.0029496  | 0.0032851 | -0.0053627 | 0.0112618  |
| Full | Hateful comments/total comments | 13  | -0.0007715 | 0.0016108 | -0.0048473 | 0.0033043  |
| Full | Hateful comments/total comments | 14  | 0.0021333  | 0.0028132 | -0.0049849 | 0.0092515  |
| Full | Hateful comments/total comments | 15  | 0.0024010  | 0.0050587 | -0.0103990 | 0.0152009  |

|      |                                 |    |            |           |            |            |
|------|---------------------------------|----|------------|-----------|------------|------------|
| Full | Hateful comments/total comments | 16 | 0.0017846  | 0.0036019 | -0.0073293 | 0.0108985  |
| Full | Hateful comments/total comments | 17 | 0.0015649  | 0.0044072 | -0.0095866 | 0.0127165  |
| Full | Hateful comments/total comments | 18 | 0.0023076  | 0.0061895 | -0.0133536 | 0.0179689  |
| Full | Hateful comments/total comments | 19 | 0.0059923  | 0.0043068 | -0.0049051 | 0.0168896  |
| Full | Hateful comments/total comments | 20 | 0.0010669  | 0.0023969 | -0.0049979 | 0.0071316  |
| Full | Hateful comments/total comments | 21 | 0.0006917  | 0.0037250 | -0.0087337 | 0.0101170  |
| Full | Hateful comments/total comments | 22 | 0.0013667  | 0.0038461 | -0.0083651 | 0.0110984  |
| Full | Hateful comments/total comments | 23 | 0.0006551  | 0.0034792 | -0.0081482 | 0.0094584  |
| Full | Hateful comments/total comments | 24 | -0.0005155 | 0.0034388 | -0.0092165 | 0.0081855  |
| Full | Hateful comments/total comments | 25 | -0.0003562 | 0.0037061 | -0.0097337 | 0.0090214  |
| Full | Hateful comments/total comments | 26 | -0.0002088 | 0.0034760 | -0.0090042 | 0.0085865  |
| Full | Hateful comments/total comments | 27 | -0.0041512 | 0.0028333 | -0.0113202 | 0.0030178  |
| Full | Hateful comments/total comments | 28 | -0.0041956 | 0.0022389 | -0.0098607 | 0.0014695  |
| Full | Hateful comments/total comments | 29 | -0.0029241 | 0.0064669 | -0.0192873 | 0.0134390  |
| Full | Hateful comments/total comments | 30 | -0.0064666 | 0.0051628 | -0.0195299 | 0.0065967  |
| Full | Hateful comments/total comments | 31 | -0.0069909 | 0.0048109 | -0.0191639 | 0.0051821  |
| Full | Hateful comments/total comments | 32 | -0.0035628 | 0.0080565 | -0.0239480 | 0.0168225  |
| Full | Hateful comments/total comments | 33 | -0.0060150 | 0.0037592 | -0.0155268 | 0.0034969  |
| Full | Hateful comments/total comments | 34 | -0.0028905 | 0.0008341 | -0.0050009 | -0.0007800 |
| Full | Hateful comments/total comments | 35 | -0.0059325 | 0.0031292 | -0.0138503 | 0.0019853  |
| Full | Hateful comments/total comments | 36 | -0.0012776 | 0.0023230 | -0.0071555 | 0.0046003  |
| Full | Hateful comments/total comments | 37 | -0.0037984 | 0.0030377 | -0.0114847 | 0.0038878  |
| Full | Hateful comments/total comments | 38 | -0.0040332 | 0.0015220 | -0.0078843 | -0.0001821 |
| Full | Hateful comments/total comments | 39 | -0.0048904 | 0.0032112 | -0.0130157 | 0.0032348  |
| Full | Hateful comments/total comments | 40 | -0.0029065 | 0.0027514 | -0.0098684 | 0.0040553  |
| Full | Hateful comments/total comments | 41 | -0.0074019 | 0.0025570 | -0.0138718 | -0.0009321 |
| Full | Hateful comments/total comments | 42 | -0.0067046 | 0.0072860 | -0.0251403 | 0.0117310  |
| Full | Hateful comments/total comments | 43 | -0.0152626 | 0.0061282 | -0.0307687 | 0.0002435  |
| Full | Hateful comments/total comments | 44 | -0.0142777 | 0.0077484 | -0.0338835 | 0.0053280  |
| Full | Hateful comments/total comments | 45 | -0.0140120 | 0.0006978 | -0.0157775 | -0.0122465 |
| Full | Hateful comments/total comments | 47 | -0.0059615 | NA        | NA         | NA         |
| Full | Hateful comments/total comments | 48 | -0.0084276 | NA        | NA         | NA         |
| Full | Hateful comments/total comments | 49 | -0.0042865 | NA        | NA         | NA         |
| Full | Hateful comments/total comments | 50 | -0.0086599 | NA        | NA         | NA         |
| Full | Hateful comments/total comments | 51 | -0.0092292 | 0.0065405 | -0.0257785 | 0.0073200  |
| Full | Hateful comments/total comments | 52 | -0.0069031 | 0.0043928 | -0.0180180 | 0.0042118  |
| Full | Hateful comments/total comments | 53 | -0.0096346 | 0.0041104 | -0.0200352 | 0.0007659  |
| Full | Hateful comments/total comments | 54 | -0.0078700 | 0.0042465 | -0.0186148 | 0.0028749  |
| Full | Hateful comments/total comments | 55 | -0.0095707 | 0.0016726 | -0.0138029 | -0.0053386 |
| Full | Hateful comments/total comments | 56 | -0.0121540 | 0.0105518 | -0.0388531 | 0.0145451  |
| Full | Hateful comments/total comments | 57 | -0.0064352 | 0.0000813 | -0.0066409 | -0.0062296 |

|      |                                 |    |            |           |            |            |
|------|---------------------------------|----|------------|-----------|------------|------------|
| Full | Hateful comments/total comments | 58 | -0.0148221 | 0.0019057 | -0.0196441 | -0.0100001 |
| Full | Hateful comments/total comments | 59 | -0.0109943 | 0.0293981 | -0.0853797 | 0.0633911  |

| sample | outcome                         | event.time | estimate   | std.error | conf.low   | conf.high  |
|--------|---------------------------------|------------|------------|-----------|------------|------------|
| Most   | Hateful comments/total comments | -44        | 0.0018165  | 0.0007319 | -0.0000320 | 0.0036651  |
| Most   | Hateful comments/total comments | -43        | 0.0038260  | 0.0038688 | -0.0059452 | 0.0135971  |
| Most   | Hateful comments/total comments | -42        | 0.0003445  | 0.0061465 | -0.0151793 | 0.0158682  |
| Most   | Hateful comments/total comments | -41        | 0.0025496  | 0.0061676 | -0.0130275 | 0.0181267  |
| Most   | Hateful comments/total comments | -40        | -0.0069224 | 0.0044752 | -0.0182252 | 0.0043803  |
| Most   | Hateful comments/total comments | -39        | 0.0100279  | 0.0031663 | 0.0020310  | 0.0180249  |
| Most   | Hateful comments/total comments | -38        | 0.0017284  | 0.0018246 | -0.0028800 | 0.0063368  |
| Most   | Hateful comments/total comments | -37        | -0.0008351 | 0.0044936 | -0.0121844 | 0.0105141  |
| Most   | Hateful comments/total comments | -36        | 0.0004998  | 0.0069924 | -0.0171604 | 0.0181600  |
| Most   | Hateful comments/total comments | -35        | 0.0042741  | 0.0051809 | -0.0088109 | 0.0173592  |
| Most   | Hateful comments/total comments | -34        | -0.0143492 | 0.0040454 | -0.0245665 | -0.0041320 |
| Most   | Hateful comments/total comments | -33        | 0.0156880  | 0.0056639 | 0.0013831  | 0.0299929  |
| Most   | Hateful comments/total comments | -32        | 0.0000758  | 0.0023120 | -0.0057636 | 0.0059152  |
| Most   | Hateful comments/total comments | -31        | -0.0087237 | 0.0041224 | -0.0191354 | 0.0016880  |
| Most   | Hateful comments/total comments | -30        | 0.0032724  | 0.0016972 | -0.0010141 | 0.0075588  |
| Most   | Hateful comments/total comments | -29        | -0.0023623 | 0.0018939 | -0.0071456 | 0.0024210  |
| Most   | Hateful comments/total comments | -28        | 0.0020801  | 0.0042352 | -0.0086164 | 0.0127766  |
| Most   | Hateful comments/total comments | -27        | -0.0069140 | 0.0028106 | -0.0140126 | 0.0001847  |
| Most   | Hateful comments/total comments | -26        | 0.0037193  | 0.0038743 | -0.0060659 | 0.0135044  |
| Most   | Hateful comments/total comments | -25        | -0.0090826 | 0.0053019 | -0.0224733 | 0.0043082  |
| Most   | Hateful comments/total comments | -24        | 0.0042494  | 0.0055159 | -0.0096818 | 0.0181807  |
| Most   | Hateful comments/total comments | -23        | -0.0038852 | 0.0034274 | -0.0125415 | 0.0047711  |
| Most   | Hateful comments/total comments | -22        | 0.0055349  | 0.0041374 | -0.0049147 | 0.0159844  |
| Most   | Hateful comments/total comments | -21        | 0.0000523  | 0.0032103 | -0.0080557 | 0.0081603  |
| Most   | Hateful comments/total comments | -20        | -0.0036870 | 0.0028655 | -0.0109242 | 0.0035501  |
| Most   | Hateful comments/total comments | -19        | -0.0023962 | 0.0069456 | -0.0199383 | 0.0151460  |
| Most   | Hateful comments/total comments | -18        | 0.0088797  | 0.0080500 | -0.0114517 | 0.0292112  |
| Most   | Hateful comments/total comments | -17        | 0.0024562  | 0.0031684 | -0.0055461 | 0.0104585  |
| Most   | Hateful comments/total comments | -16        | -0.0087385 | 0.0029968 | -0.0163074 | -0.0011695 |
| Most   | Hateful comments/total comments | -15        | -0.0013655 | 0.0046330 | -0.0130667 | 0.0103357  |
| Most   | Hateful comments/total comments | -14        | 0.0004166  | 0.0014937 | -0.0033559 | 0.0041891  |
| Most   | Hateful comments/total comments | -13        | 0.0069362  | 0.0022015 | 0.0013760  | 0.0124963  |
| Most   | Hateful comments/total comments | -12        | -0.0060530 | 0.0039467 | -0.0160209 | 0.0039149  |
| Most   | Hateful comments/total comments | -11        | 0.0054841  | 0.0035031 | -0.0033634 | 0.0143316  |
| Most   | Hateful comments/total comments | -10        | -0.0047507 | 0.0031995 | -0.0128314 | 0.0033301  |
| Most   | Hateful comments/total comments | -9         | -0.0004816 | 0.0278498 | -0.0708202 | 0.0698569  |
| Most   | Hateful comments/total comments | -8         | -0.0020301 | 0.0288306 | -0.0748457 | 0.0707855  |

|      |                                 |    |            |           |            |            |
|------|---------------------------------|----|------------|-----------|------------|------------|
| Most | Hateful comments/total comments | -7 | 0.0047527  | 0.0014436 | 0.0011067  | 0.0083988  |
| Most | Hateful comments/total comments | -6 | -0.0031109 | 0.0030582 | -0.0108348 | 0.0046131  |
| Most | Hateful comments/total comments | -5 | 0.0026958  | 0.0037178 | -0.0066941 | 0.0120856  |
| Most | Hateful comments/total comments | -4 | -0.0088253 | 0.0039315 | -0.0187549 | 0.0011042  |
| Most | Hateful comments/total comments | -3 | 0.0040160  | 0.0031015 | -0.0038173 | 0.0118494  |
| Most | Hateful comments/total comments | -2 | -0.0001525 | 0.0048407 | -0.0123783 | 0.0120734  |
| Most | Hateful comments/total comments | -1 | 0.0071402  | 0.0022090 | 0.0015610  | 0.0127193  |
| Most | Hateful comments/total comments | 0  | -0.0047466 | 0.0033844 | -0.0132943 | 0.0038011  |
| Most | Hateful comments/total comments | 1  | -0.0057745 | 0.0035253 | -0.0146781 | 0.0031290  |
| Most | Hateful comments/total comments | 2  | -0.0050282 | 0.0031789 | -0.0130569 | 0.0030005  |
| Most | Hateful comments/total comments | 3  | -0.0055267 | 0.0055569 | -0.0195614 | 0.0085080  |
| Most | Hateful comments/total comments | 4  | -0.0046773 | 0.0020018 | -0.0097332 | 0.0003785  |
| Most | Hateful comments/total comments | 5  | -0.0032490 | 0.0065693 | -0.0198408 | 0.0133427  |
| Most | Hateful comments/total comments | 6  | -0.0081836 | 0.0032119 | -0.0162957 | -0.0000715 |
| Most | Hateful comments/total comments | 7  | -0.0039397 | 0.0038532 | -0.0136714 | 0.0057920  |
| Most | Hateful comments/total comments | 8  | -0.0028387 | 0.0038664 | -0.0126037 | 0.0069264  |
| Most | Hateful comments/total comments | 9  | -0.0050963 | 0.0021979 | -0.0106474 | 0.0004548  |
| Most | Hateful comments/total comments | 10 | -0.0057506 | 0.0036657 | -0.0150088 | 0.0035075  |
| Most | Hateful comments/total comments | 11 | -0.0052008 | 0.0042555 | -0.0159487 | 0.0055471  |
| Most | Hateful comments/total comments | 12 | -0.0061094 | 0.0034748 | -0.0148855 | 0.0026667  |
| Most | Hateful comments/total comments | 13 | -0.0042043 | 0.0029652 | -0.0116934 | 0.0032848  |
| Most | Hateful comments/total comments | 14 | -0.0023959 | 0.0032766 | -0.0106715 | 0.0058797  |
| Most | Hateful comments/total comments | 15 | -0.0028748 | 0.0055873 | -0.0169863 | 0.0112366  |
| Most | Hateful comments/total comments | 16 | -0.0062977 | 0.0051492 | -0.0193028 | 0.0067074  |
| Most | Hateful comments/total comments | 17 | -0.0058531 | 0.0076596 | -0.0251985 | 0.0134922  |
| Most | Hateful comments/total comments | 18 | -0.0005535 | 0.0074620 | -0.0193998 | 0.0182928  |
| Most | Hateful comments/total comments | 19 | 0.0026141  | 0.0054429 | -0.0111326 | 0.0163608  |
| Most | Hateful comments/total comments | 20 | -0.0081642 | 0.0032718 | -0.0164275 | 0.0000990  |
| Most | Hateful comments/total comments | 21 | -0.0045278 | 0.0042634 | -0.0152956 | 0.0062400  |
| Most | Hateful comments/total comments | 22 | -0.0030126 | 0.0055583 | -0.0170509 | 0.0110258  |
| Most | Hateful comments/total comments | 23 | -0.0034040 | 0.0055743 | -0.0174827 | 0.0106748  |
| Most | Hateful comments/total comments | 24 | -0.0043131 | 0.0039120 | -0.0141935 | 0.0055672  |
| Most | Hateful comments/total comments | 25 | -0.0024952 | 0.0054627 | -0.0162919 | 0.0113015  |
| Most | Hateful comments/total comments | 26 | -0.0017926 | 0.0045283 | -0.0132294 | 0.0096441  |
| Most | Hateful comments/total comments | 27 | -0.0078221 | 0.0073086 | -0.0262810 | 0.0106368  |
| Most | Hateful comments/total comments | 28 | -0.0077335 | 0.0038471 | -0.0174498 | 0.0019828  |
| Most | Hateful comments/total comments | 29 | 0.0039855  | 0.0105052 | -0.0225469 | 0.0305178  |
| Most | Hateful comments/total comments | 30 | -0.0080639 | 0.0035981 | -0.0171514 | 0.0010237  |
| Most | Hateful comments/total comments | 31 | -0.0090271 | 0.0015174 | -0.0128594 | -0.0051947 |
| Most | Hateful comments/total comments | 32 | -0.0053069 | 0.0124292 | -0.0366985 | 0.0260847  |
| Most | Hateful comments/total comments | 33 | -0.0119065 | 0.0027366 | -0.0188182 | -0.0049947 |

|      |                                 |    |            |           |            |            |
|------|---------------------------------|----|------------|-----------|------------|------------|
| Most | Hateful comments/total comments | 34 | -0.0089495 | 0.0040081 | -0.0190726 | 0.0011735  |
| Most | Hateful comments/total comments | 35 | -0.0095032 | 0.0033081 | -0.0178582 | -0.0011481 |
| Most | Hateful comments/total comments | 36 | -0.0075706 | 0.0030028 | -0.0151546 | 0.0000135  |
| Most | Hateful comments/total comments | 37 | -0.0099975 | 0.0038776 | -0.0197908 | -0.0002041 |
| Most | Hateful comments/total comments | 38 | -0.0074461 | 0.0032346 | -0.0156155 | 0.0007232  |
| Most | Hateful comments/total comments | 39 | -0.0104857 | 0.0036334 | -0.0196625 | -0.0013090 |
| Most | Hateful comments/total comments | 40 | -0.0101037 | 0.0020228 | -0.0152125 | -0.0049948 |
| Most | Hateful comments/total comments | 41 | -0.0137409 | 0.0011914 | -0.0167501 | -0.0107318 |
| Most | Hateful comments/total comments | 42 | -0.0127529 | 0.0039087 | -0.0226249 | -0.0028809 |
| Most | Hateful comments/total comments | 43 | -0.0061619 | 0.0126120 | -0.0380151 | 0.0256914  |
| Most | Hateful comments/total comments | 44 | -0.0091202 | 0.0153208 | -0.0478149 | 0.0295746  |
| Most | Hateful comments/total comments | 45 | -0.0166877 | 0.0089059 | -0.0391809 | 0.0058055  |
| Most | Hateful comments/total comments | 47 | -0.0039748 | NA        | NA         | NA         |
| Most | Hateful comments/total comments | 48 | -0.0051514 | NA        | NA         | NA         |
| Most | Hateful comments/total comments | 49 | -0.0096247 | NA        | NA         | NA         |
| Most | Hateful comments/total comments | 50 | -0.0100726 | NA        | NA         | NA         |
| Most | Hateful comments/total comments | 51 | -0.0058654 | 0.0130456 | -0.0388139 | 0.0270831  |
| Most | Hateful comments/total comments | 52 | -0.0119447 | 0.0018319 | -0.0165713 | -0.0073180 |
| Most | Hateful comments/total comments | 53 | -0.0105777 | 0.0034780 | -0.0193619 | -0.0017934 |
| Most | Hateful comments/total comments | 54 | -0.0112590 | 0.0038910 | -0.0210863 | -0.0014316 |
| Most | Hateful comments/total comments | 55 | -0.0124244 | 0.0057394 | -0.0269201 | 0.0020713  |
| Most | Hateful comments/total comments | 56 | -0.0106549 | 0.0058874 | -0.0255243 | 0.0042145  |
| Most | Hateful comments/total comments | 57 | -0.0007309 | 0.0130953 | -0.0338049 | 0.0323431  |
| Most | Hateful comments/total comments | 58 | -0.0081446 | 0.0096779 | -0.0325874 | 0.0162982  |
| Most | Hateful comments/total comments | 59 | -0.0100447 | 0.0093701 | -0.0337101 | 0.0136207  |

| sample | outcome                         | event.time | estimate   | std.error | conf.low   | conf.high  |
|--------|---------------------------------|------------|------------|-----------|------------|------------|
| Middle | Hateful comments/total comments | -44        | -0.0055871 | 0.0023060 | -0.0112716 | 0.0000974  |
| Middle | Hateful comments/total comments | -43        | -0.0063544 | 0.0033980 | -0.0147307 | 0.0020219  |
| Middle | Hateful comments/total comments | -42        | 0.0025903  | 0.0051892 | -0.0102016 | 0.0153823  |
| Middle | Hateful comments/total comments | -41        | 0.0073766  | 0.0079872 | -0.0123124 | 0.0270657  |
| Middle | Hateful comments/total comments | -40        | -0.0092246 | 0.0044985 | -0.0203138 | 0.0018647  |
| Middle | Hateful comments/total comments | -39        | 0.0126738  | 0.0038867 | 0.0030928  | 0.0222547  |
| Middle | Hateful comments/total comments | -38        | -0.0085277 | 0.0035933 | -0.0173854 | 0.0003300  |
| Middle | Hateful comments/total comments | -37        | 0.0042975  | 0.0041615 | -0.0059610 | 0.0145559  |
| Middle | Hateful comments/total comments | -36        | 0.0004817  | 0.0026110 | -0.0059548 | 0.0069181  |
| Middle | Hateful comments/total comments | -35        | 0.0020373  | 0.0025676 | -0.0042921 | 0.0083667  |
| Middle | Hateful comments/total comments | -34        | -0.0038068 | 0.0077638 | -0.0229454 | 0.0153318  |
| Middle | Hateful comments/total comments | -33        | 0.0013122  | 0.0046734 | -0.0102082 | 0.0128326  |
| Middle | Hateful comments/total comments | -32        | 0.0120763  | 0.0075867 | -0.0066257 | 0.0307782  |
| Middle | Hateful comments/total comments | -31        | -0.0226016 | 0.0051380 | -0.0352672 | -0.0099359 |



|        |                                 |     |            |           |            |            |
|--------|---------------------------------|-----|------------|-----------|------------|------------|
| Middle | Hateful comments/total comments | -30 | 0.0077800  | 0.0025176 | 0.0015740  | 0.0139861  |
| Middle | Hateful comments/total comments | -29 | 0.0011875  | 0.0045830 | -0.0101100 | 0.0124849  |
| Middle | Hateful comments/total comments | -28 | 0.0028105  | 0.0025716 | -0.0035288 | 0.0091498  |
| Middle | Hateful comments/total comments | -27 | -0.0062849 | 0.0034389 | -0.0147622 | 0.0021923  |
| Middle | Hateful comments/total comments | -26 | 0.0055756  | 0.0034947 | -0.0030391 | 0.0141903  |
| Middle | Hateful comments/total comments | -25 | -0.0017971 | 0.0028576 | -0.0088413 | 0.0052472  |
| Middle | Hateful comments/total comments | -24 | 0.0009129  | 0.0030890 | -0.0067018 | 0.0085277  |
| Middle | Hateful comments/total comments | -23 | -0.0003382 | 0.0051274 | -0.0129776 | 0.0123012  |
| Middle | Hateful comments/total comments | -22 | -0.0038722 | 0.0056718 | -0.0178538 | 0.0101094  |
| Middle | Hateful comments/total comments | -21 | -0.0007669 | 0.0039121 | -0.0104106 | 0.0088769  |
| Middle | Hateful comments/total comments | -20 | 0.0008934  | 0.0032027 | -0.0070016 | 0.0087884  |
| Middle | Hateful comments/total comments | -19 | -0.0006582 | 0.0032475 | -0.0086637 | 0.0073473  |
| Middle | Hateful comments/total comments | -18 | -0.0002763 | 0.0039756 | -0.0100765 | 0.0095239  |
| Middle | Hateful comments/total comments | -17 | 0.0075167  | 0.0031369 | -0.0002161 | 0.0152495  |
| Middle | Hateful comments/total comments | -16 | -0.0024827 | 0.0026834 | -0.0090975 | 0.0041320  |
| Middle | Hateful comments/total comments | -15 | -0.0022260 | 0.0031898 | -0.0100890 | 0.0056371  |
| Middle | Hateful comments/total comments | -14 | -0.0013928 | 0.0029749 | -0.0087262 | 0.0059405  |
| Middle | Hateful comments/total comments | -13 | 0.0040902  | 0.0014703 | 0.0004656  | 0.0077147  |
| Middle | Hateful comments/total comments | -12 | -0.0079273 | 0.0011138 | -0.0106730 | -0.0051816 |
| Middle | Hateful comments/total comments | -11 | 0.0042463  | 0.0030475 | -0.0032660 | 0.0117586  |
| Middle | Hateful comments/total comments | -10 | 0.0028102  | 0.0044319 | -0.0081148 | 0.0137352  |
| Middle | Hateful comments/total comments | -9  | -0.0027033 | 0.0421289 | -0.1065548 | 0.1011482  |
| Middle | Hateful comments/total comments | -8  | 0.0022179  | 0.0413855 | -0.0998011 | 0.1042369  |
| Middle | Hateful comments/total comments | -7  | -0.0008909 | 0.0021594 | -0.0062139 | 0.0044321  |
| Middle | Hateful comments/total comments | -6  | -0.0002194 | 0.0029361 | -0.0074572 | 0.0070184  |
| Middle | Hateful comments/total comments | -5  | -0.0048195 | 0.0020812 | -0.0099498 | 0.0003109  |
| Middle | Hateful comments/total comments | -4  | 0.0040625  | 0.0024336 | -0.0019364 | 0.0100615  |
| Middle | Hateful comments/total comments | -3  | -0.0038443 | 0.0051484 | -0.0165356 | 0.0088471  |
| Middle | Hateful comments/total comments | -2  | 0.0040989  | 0.0042602 | -0.0064029 | 0.0146008  |
| Middle | Hateful comments/total comments | -1  | -0.0003004 | 0.0064600 | -0.0162249 | 0.0156241  |
| Middle | Hateful comments/total comments | 0   | 0.0021317  | 0.0048851 | -0.0099106 | 0.0141739  |
| Middle | Hateful comments/total comments | 1   | 0.0014463  | 0.0038632 | -0.0080768 | 0.0109694  |
| Middle | Hateful comments/total comments | 2   | -0.0010980 | 0.0036210 | -0.0100242 | 0.0078281  |
| Middle | Hateful comments/total comments | 3   | 0.0018218  | 0.0064689 | -0.0141247 | 0.0177682  |
| Middle | Hateful comments/total comments | 4   | -0.0002774 | 0.0039916 | -0.0101172 | 0.0095623  |
| Middle | Hateful comments/total comments | 5   | -0.0002244 | 0.0034585 | -0.0087500 | 0.0083012  |
| Middle | Hateful comments/total comments | 6   | -0.0012593 | 0.0035022 | -0.0098924 | 0.0073738  |
| Middle | Hateful comments/total comments | 7   | -0.0016547 | 0.0032606 | -0.0096924 | 0.0063831  |
| Middle | Hateful comments/total comments | 8   | 0.0027764  | 0.0031810 | -0.0050650 | 0.0106178  |
| Middle | Hateful comments/total comments | 9   | -0.0036034 | 0.0047006 | -0.0151909 | 0.0079841  |
| Middle | Hateful comments/total comments | 10  | -0.0025962 | 0.0023787 | -0.0084598 | 0.0032675  |

|        |                                 |    |            |           |            |            |
|--------|---------------------------------|----|------------|-----------|------------|------------|
| Middle | Hateful comments/total comments | 11 | 0.0016969  | 0.0037038 | -0.0074334 | 0.0108272  |
| Middle | Hateful comments/total comments | 12 | 0.0049038  | 0.0086506 | -0.0164206 | 0.0262282  |
| Middle | Hateful comments/total comments | 13 | -0.0042310 | 0.0054693 | -0.0177132 | 0.0092512  |
| Middle | Hateful comments/total comments | 14 | 0.0018463  | 0.0029345 | -0.0053876 | 0.0090802  |
| Middle | Hateful comments/total comments | 15 | 0.0054985  | 0.0068009 | -0.0112664 | 0.0222633  |
| Middle | Hateful comments/total comments | 16 | 0.0020362  | 0.0054625 | -0.0114293 | 0.0155017  |
| Middle | Hateful comments/total comments | 17 | 0.0045409  | 0.0058633 | -0.0099127 | 0.0189946  |
| Middle | Hateful comments/total comments | 18 | 0.0046033  | 0.0139929 | -0.0298904 | 0.0390969  |
| Middle | Hateful comments/total comments | 19 | 0.0102355  | 0.0056272 | -0.0036360 | 0.0241070  |
| Middle | Hateful comments/total comments | 20 | 0.0032301  | 0.0039910 | -0.0066080 | 0.0130682  |
| Middle | Hateful comments/total comments | 21 | 0.0028562  | 0.0047829 | -0.0089341 | 0.0146466  |
| Middle | Hateful comments/total comments | 22 | 0.0009921  | 0.0052892 | -0.0120462 | 0.0140304  |
| Middle | Hateful comments/total comments | 23 | 0.0007943  | 0.0075968 | -0.0179326 | 0.0195211  |
| Middle | Hateful comments/total comments | 24 | -0.0009613 | 0.0038064 | -0.0103445 | 0.0084219  |
| Middle | Hateful comments/total comments | 25 | -0.0010912 | 0.0061067 | -0.0161448 | 0.0139624  |
| Middle | Hateful comments/total comments | 26 | -0.0001932 | 0.0036156 | -0.0091061 | 0.0087197  |
| Middle | Hateful comments/total comments | 27 | -0.0005062 | 0.0025811 | -0.0068689 | 0.0058564  |
| Middle | Hateful comments/total comments | 28 | -0.0035538 | 0.0088057 | -0.0252605 | 0.0181529  |
| Middle | Hateful comments/total comments | 29 | -0.0055830 | 0.0129971 | -0.0376221 | 0.0264561  |
| Middle | Hateful comments/total comments | 30 | -0.0061995 | 0.0163636 | -0.0465373 | 0.0341382  |
| Middle | Hateful comments/total comments | 31 | -0.0051500 | 0.0016291 | -0.0091658 | -0.0011342 |
| Middle | Hateful comments/total comments | 32 | -0.0048544 | 0.0122412 | -0.0350301 | 0.0253214  |
| Middle | Hateful comments/total comments | 33 | -0.0097937 | 0.0090205 | -0.0320301 | 0.0124427  |
| Middle | Hateful comments/total comments | 34 | -0.0011229 | 0.0045322 | -0.0122953 | 0.0100494  |
| Middle | Hateful comments/total comments | 35 | -0.0039689 | 0.0059628 | -0.0186678 | 0.0107300  |
| Middle | Hateful comments/total comments | 36 | -0.0015828 | 0.0053842 | -0.0148555 | 0.0116898  |
| Middle | Hateful comments/total comments | 37 | -0.0042889 | 0.0075043 | -0.0227875 | 0.0142098  |
| Middle | Hateful comments/total comments | 38 | -0.0052281 | 0.0038463 | -0.0147097 | 0.0042535  |
| Middle | Hateful comments/total comments | 39 | -0.0081501 | 0.0083268 | -0.0286764 | 0.0123762  |
| Middle | Hateful comments/total comments | 40 | -0.0028022 | 0.0080881 | -0.0227400 | 0.0171357  |
| Middle | Hateful comments/total comments | 41 | -0.0059429 | 0.0085351 | -0.0269828 | 0.0150969  |
| Middle | Hateful comments/total comments | 42 | -0.0042038 | 0.0147122 | -0.0404707 | 0.0320630  |
| Middle | Hateful comments/total comments | 43 | -0.0164304 | 0.0451836 | -0.1278119 | 0.0949511  |
| Middle | Hateful comments/total comments | 44 | -0.0179230 | 0.0690367 | -0.1881046 | 0.1522585  |
| Middle | Hateful comments/total comments | 45 | -0.0131031 | 0.0502927 | -0.1370792 | 0.1108729  |
| Middle | Hateful comments/total comments | 47 | -0.0104615 | NA        | NA         | NA         |
| Middle | Hateful comments/total comments | 48 | -0.0083482 | NA        | NA         | NA         |
| Middle | Hateful comments/total comments | 49 | -0.0060225 | NA        | NA         | NA         |
| Middle | Hateful comments/total comments | 50 | -0.0122857 | NA        | NA         | NA         |
| Middle | Hateful comments/total comments | 51 | -0.0103581 | 0.0125591 | -0.0413175 | 0.0206013  |
| Middle | Hateful comments/total comments | 52 | -0.0078265 | 0.0154214 | -0.0458417 | 0.0301888  |

|        |                                 |    |            |           |            |           |
|--------|---------------------------------|----|------------|-----------|------------|-----------|
| Middle | Hateful comments/total comments | 53 | -0.0105937 | 0.0100955 | -0.0354800 | 0.0142926 |
| Middle | Hateful comments/total comments | 54 | -0.0090493 | 0.0166889 | -0.0501888 | 0.0320903 |
| Middle | Hateful comments/total comments | 55 | -0.0104985 | 0.0165003 | -0.0511732 | 0.0301761 |
| Middle | Hateful comments/total comments | 56 | -0.0148592 | 0.0998430 | -0.2609811 | 0.2312627 |
| Middle | Hateful comments/total comments | 57 | -0.0032262 | 0.0788755 | -0.1976613 | 0.1912090 |
| Middle | Hateful comments/total comments | 58 | -0.0230779 | 0.0702148 | -0.1961638 | 0.1500080 |
| Middle | Hateful comments/total comments | 59 | -0.0134770 | 0.1675665 | -0.4265434 | 0.3995893 |

| sample | outcome                         | event.time | estimate   | std.error | conf.low   | conf.high  |
|--------|---------------------------------|------------|------------|-----------|------------|------------|
| Least  | Hateful comments/total comments | -44        | 0.0016433  | 0.0023551 | -0.0044840 | 0.0077706  |
| Least  | Hateful comments/total comments | -43        | 0.0076231  | 0.0040530 | -0.0029218 | 0.0181680  |
| Least  | Hateful comments/total comments | -42        | -0.0081635 | 0.0011930 | -0.0112674 | -0.0050597 |
| Least  | Hateful comments/total comments | -41        | -0.0034984 | 0.0050272 | -0.0165780 | 0.0095812  |
| Least  | Hateful comments/total comments | -40        | 0.0060993  | 0.0066711 | -0.0112572 | 0.0234559  |
| Least  | Hateful comments/total comments | -39        | -0.0012090 | 0.0041207 | -0.0119302 | 0.0095122  |
| Least  | Hateful comments/total comments | -38        | 0.0064751  | 0.0012665 | 0.0031798  | 0.0097703  |
| Least  | Hateful comments/total comments | -37        | -0.0039860 | 0.0018547 | -0.0088115 | 0.0008395  |
| Least  | Hateful comments/total comments | -36        | 0.0046485  | 0.0041897 | -0.0062520 | 0.0155489  |
| Least  | Hateful comments/total comments | -35        | -0.0083737 | 0.0025913 | -0.0151156 | -0.0016318 |
| Least  | Hateful comments/total comments | -34        | -0.0001105 | 0.0024666 | -0.0065280 | 0.0063070  |
| Least  | Hateful comments/total comments | -33        | 0.0065464  | 0.0031145 | -0.0015568 | 0.0146496  |
| Least  | Hateful comments/total comments | -32        | -0.0060878 | 0.0036365 | -0.0155493 | 0.0033736  |
| Least  | Hateful comments/total comments | -31        | 0.0005515  | 0.0037231 | -0.0091351 | 0.0102380  |
| Least  | Hateful comments/total comments | -30        | 0.0040716  | 0.0039577 | -0.0062254 | 0.0143685  |
| Least  | Hateful comments/total comments | -29        | -0.0048520 | 0.0024696 | -0.0112773 | 0.0015733  |
| Least  | Hateful comments/total comments | -28        | 0.0017342  | 0.0009980 | -0.0008624 | 0.0043307  |
| Least  | Hateful comments/total comments | -27        | 0.0087420  | 0.0067185 | -0.0087378 | 0.0262218  |
| Least  | Hateful comments/total comments | -26        | -0.0039354 | 0.0027671 | -0.0111347 | 0.0032639  |
| Least  | Hateful comments/total comments | -25        | 0.0030986  | 0.0017574 | -0.0014737 | 0.0076709  |
| Least  | Hateful comments/total comments | -24        | -0.0115750 | 0.0045847 | -0.0235033 | 0.0003533  |
| Least  | Hateful comments/total comments | -23        | 0.0064591  | 0.0023277 | 0.0004030  | 0.0125153  |
| Least  | Hateful comments/total comments | -22        | 0.0007290  | 0.0063934 | -0.0159051 | 0.0173632  |
| Least  | Hateful comments/total comments | -21        | 0.0012411  | 0.0025536 | -0.0054029 | 0.0078851  |
| Least  | Hateful comments/total comments | -20        | -0.0008064 | 0.0034043 | -0.0096636 | 0.0080508  |
| Least  | Hateful comments/total comments | -19        | 0.0023785  | 0.0015874 | -0.0017516 | 0.0065086  |
| Least  | Hateful comments/total comments | -18        | -0.0029697 | 0.0042026 | -0.0139038 | 0.0079644  |
| Least  | Hateful comments/total comments | -17        | 0.0031421  | 0.0022941 | -0.0028265 | 0.0091107  |
| Least  | Hateful comments/total comments | -16        | -0.0021073 | 0.0034302 | -0.0110317 | 0.0068172  |
| Least  | Hateful comments/total comments | -15        | 0.0008648  | 0.0017628 | -0.0037216 | 0.0054513  |
| Least  | Hateful comments/total comments | -14        | 0.0033661  | 0.0012626 | 0.0000811  | 0.0066512  |
| Least  | Hateful comments/total comments | -13        | -0.0067462 | 0.0025899 | -0.0134846 | -0.0000078 |

|       |                                 |     |            |           |            |            |
|-------|---------------------------------|-----|------------|-----------|------------|------------|
| Least | Hateful comments/total comments | -12 | 0.0045906  | 0.0028588 | -0.0028473 | 0.0120285  |
| Least | Hateful comments/total comments | -11 | -0.0004639 | 0.0017238 | -0.0049489 | 0.0040211  |
| Least | Hateful comments/total comments | -10 | 0.0019296  | 0.0036496 | -0.0075658 | 0.0114249  |
| Least | Hateful comments/total comments | -9  | -0.0007204 | 0.0461726 | -0.1208505 | 0.1194098  |
| Least | Hateful comments/total comments | -8  | -0.0028637 | 0.0463476 | -0.1234492 | 0.1177217  |
| Least | Hateful comments/total comments | -7  | -0.0007971 | 0.0015916 | -0.0049379 | 0.0033438  |
| Least | Hateful comments/total comments | -6  | -0.0006817 | 0.0013599 | -0.0042198 | 0.0028565  |
| Least | Hateful comments/total comments | -5  | 0.0018412  | 0.0022852 | -0.0041044 | 0.0077867  |
| Least | Hateful comments/total comments | -4  | -0.0008573 | 0.0022052 | -0.0065947 | 0.0048802  |
| Least | Hateful comments/total comments | -3  | -0.0052072 | 0.0016222 | -0.0094278 | -0.0009867 |
| Least | Hateful comments/total comments | -2  | 0.0029030  | 0.0033939 | -0.0059270 | 0.0117330  |
| Least | Hateful comments/total comments | -1  | -0.0004592 | 0.0021171 | -0.0059673 | 0.0050489  |
| Least | Hateful comments/total comments | 0   | -0.0030365 | 0.0024974 | -0.0095341 | 0.0034611  |
| Least | Hateful comments/total comments | 1   | 0.0031782  | 0.0020754 | -0.0022216 | 0.0085780  |
| Least | Hateful comments/total comments | 2   | 0.0009340  | 0.0022067 | -0.0048074 | 0.0066754  |
| Least | Hateful comments/total comments | 3   | 0.0004135  | 0.0020383 | -0.0048896 | 0.0057166  |
| Least | Hateful comments/total comments | 4   | 0.0052684  | 0.0053566 | -0.0086682 | 0.0192051  |
| Least | Hateful comments/total comments | 5   | 0.0017831  | 0.0032019 | -0.0065475 | 0.0101138  |
| Least | Hateful comments/total comments | 6   | 0.0036444  | 0.0035855 | -0.0056841 | 0.0129729  |
| Least | Hateful comments/total comments | 7   | 0.0045585  | 0.0051511 | -0.0088434 | 0.0179605  |
| Least | Hateful comments/total comments | 8   | 0.0030907  | 0.0028634 | -0.0043591 | 0.0105406  |
| Least | Hateful comments/total comments | 9   | 0.0042087  | 0.0038358 | -0.0057713 | 0.0141886  |
| Least | Hateful comments/total comments | 10  | 0.0072498  | 0.0036355 | -0.0022089 | 0.0167085  |
| Least | Hateful comments/total comments | 11  | 0.0045711  | 0.0034521 | -0.0044105 | 0.0135526  |
| Least | Hateful comments/total comments | 12  | 0.0063063  | 0.0043622 | -0.0050431 | 0.0176557  |
| Least | Hateful comments/total comments | 13  | 0.0039459  | 0.0041339 | -0.0068094 | 0.0147013  |
| Least | Hateful comments/total comments | 14  | 0.0049670  | 0.0057373 | -0.0099600 | 0.0198941  |
| Least | Hateful comments/total comments | 15  | 0.0022258  | 0.0042079 | -0.0087220 | 0.0131737  |
| Least | Hateful comments/total comments | 16  | 0.0053138  | 0.0026420 | -0.0015600 | 0.0121876  |
| Least | Hateful comments/total comments | 17  | 0.0032195  | 0.0052582 | -0.0104610 | 0.0169001  |
| Least | Hateful comments/total comments | 18  | 0.0013150  | 0.0070570 | -0.0170456 | 0.0196756  |
| Least | Hateful comments/total comments | 19  | 0.0041784  | 0.0040311 | -0.0063096 | 0.0146664  |
| Least | Hateful comments/total comments | 20  | 0.0044430  | 0.0036228 | -0.0049826 | 0.0138686  |
| Least | Hateful comments/total comments | 21  | 0.0014694  | 0.0035678 | -0.0078131 | 0.0107519  |
| Least | Hateful comments/total comments | 22  | 0.0040697  | 0.0040231 | -0.0063974 | 0.0145368  |
| Least | Hateful comments/total comments | 23  | 0.0024706  | 0.0038943 | -0.0076615 | 0.0126027  |
| Least | Hateful comments/total comments | 24  | 0.0016454  | 0.0036964 | -0.0079717 | 0.0112626  |
| Least | Hateful comments/total comments | 25  | 0.0013865  | 0.0043434 | -0.0099140 | 0.0126871  |
| Least | Hateful comments/total comments | 26  | 0.0007811  | 0.0041914 | -0.0101240 | 0.0116862  |
| Least | Hateful comments/total comments | 27  | -0.0050702 | 0.0010903 | -0.0079070 | -0.0022334 |
| Least | Hateful comments/total comments | 28  | -0.0027222 | 0.0026623 | -0.0096490 | 0.0042045  |

|       |                                 |    |            |           |            |            |
|-------|---------------------------------|----|------------|-----------|------------|------------|
| Least | Hateful comments/total comments | 29 | -0.0040066 | 0.0090821 | -0.0276361 | 0.0196229  |
| Least | Hateful comments/total comments | 30 | -0.0061315 | 0.0097369 | -0.0314645 | 0.0192015  |
| Least | Hateful comments/total comments | 31 | -0.0074175 | 0.0104698 | -0.0346575 | 0.0198225  |
| Least | Hateful comments/total comments | 32 | -0.0016932 | 0.0042851 | -0.0128420 | 0.0094556  |
| Least | Hateful comments/total comments | 33 | -0.0001548 | 0.0115484 | -0.0302011 | 0.0298915  |
| Least | Hateful comments/total comments | 34 | -0.0011871 | 0.0044309 | -0.0127152 | 0.0103410  |
| Least | Hateful comments/total comments | 35 | -0.0056645 | 0.0039114 | -0.0158410 | 0.0045120  |
| Least | Hateful comments/total comments | 36 | 0.0022002  | 0.0031227 | -0.0059243 | 0.0103247  |
| Least | Hateful comments/total comments | 37 | -0.0002212 | 0.0061875 | -0.0163196 | 0.0158773  |
| Least | Hateful comments/total comments | 38 | -0.0013256 | 0.0054374 | -0.0154724 | 0.0128211  |
| Least | Hateful comments/total comments | 39 | 0.0005865  | 0.0047663 | -0.0118143 | 0.0129873  |
| Least | Hateful comments/total comments | 40 | 0.0007090  | 0.0047656 | -0.0116900 | 0.0131079  |
| Least | Hateful comments/total comments | 41 | -0.0053085 | 0.0055013 | -0.0196217 | 0.0090047  |
| Least | Hateful comments/total comments | 42 | -0.0050036 | 0.0122739 | -0.0369374 | 0.0269301  |
| Least | Hateful comments/total comments | 43 | -0.0221574 | 0.0301286 | -0.1005449 | 0.0562300  |
| Least | Hateful comments/total comments | 44 | -0.0160371 | 0.0093204 | -0.0402866 | 0.0082124  |
| Least | Hateful comments/total comments | 45 | -0.0123920 | 0.0688259 | -0.1914607 | 0.1666767  |
| Least | Hateful comments/total comments | 47 | -0.0031077 | NA        | NA         | NA         |
| Least | Hateful comments/total comments | 48 | -0.0097169 | NA        | NA         | NA         |
| Least | Hateful comments/total comments | 49 | -0.0009016 | NA        | NA         | NA         |
| Least | Hateful comments/total comments | 50 | -0.0052331 | NA        | NA         | NA         |
| Least | Hateful comments/total comments | 51 | -0.0100145 | 0.0057663 | -0.0250171 | 0.0049882  |
| Least | Hateful comments/total comments | 52 | -0.0036885 | 0.0122602 | -0.0355866 | 0.0282096  |
| Least | Hateful comments/total comments | 53 | -0.0084206 | 0.0112094 | -0.0375849 | 0.0207436  |
| Least | Hateful comments/total comments | 54 | -0.0052738 | 0.0014943 | -0.0091617 | -0.0013858 |
| Least | Hateful comments/total comments | 55 | -0.0074354 | 0.0098384 | -0.0330325 | 0.0181617  |
| Least | Hateful comments/total comments | 56 | -0.0114804 | 0.0078942 | -0.0320193 | 0.0090584  |
| Least | Hateful comments/total comments | 57 | -0.0135944 | 0.0107291 | -0.0415089 | 0.0143200  |
| Least | Hateful comments/total comments | 58 | -0.0145538 | 0.0135107 | -0.0497053 | 0.0205978  |
| Least | Hateful comments/total comments | 59 | -0.0100138 | 0.0020356 | -0.0153099 | -0.0047177 |

## Audience outdegree

Average effect by length of exposure (Callaway and Sant'Anna)

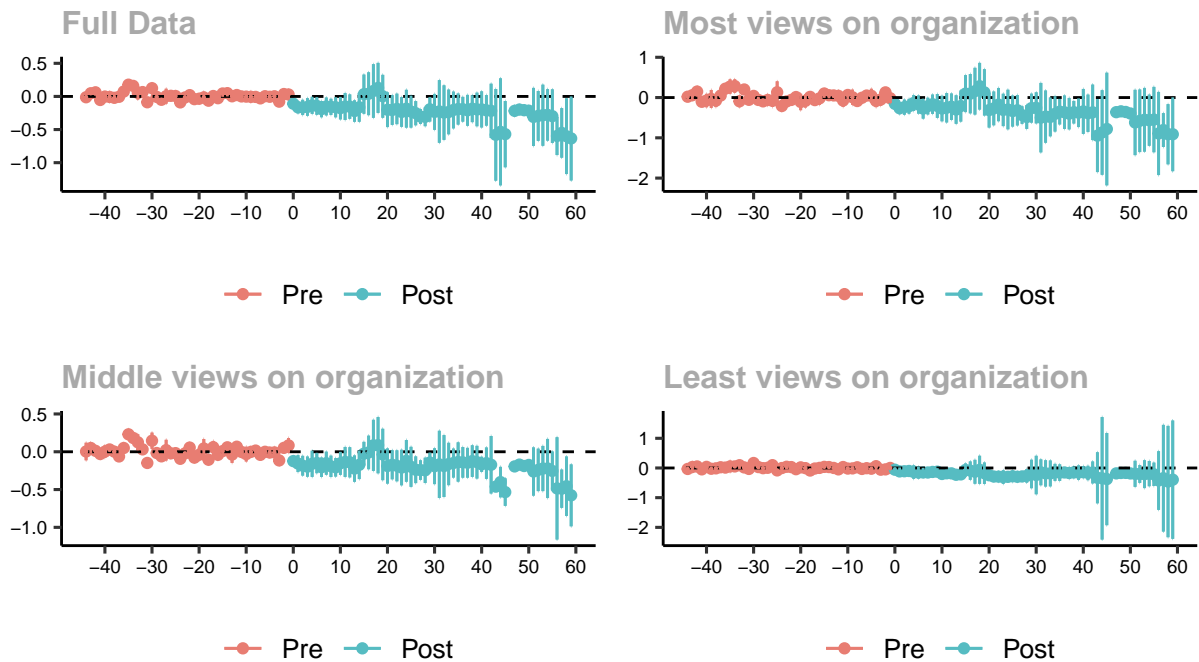

Long timeframe with sampled control groups

| sample | outcome            | event.time | estimate   | std.error | conf.low   | conf.high  |
|--------|--------------------|------------|------------|-----------|------------|------------|
| Full   | Audience outdegree | -44        | -0.0122413 | 0.0184907 | -0.0592672 | 0.0347845  |
| Full   | Audience outdegree | -43        | 0.0481967  | 0.0086925 | 0.0260897  | 0.0703037  |
| Full   | Audience outdegree | -42        | 0.0622542  | 0.0202495 | 0.0107553  | 0.1137530  |
| Full   | Audience outdegree | -41        | -0.0534704 | 0.0188878 | -0.1015063 | -0.0054345 |
| Full   | Audience outdegree | -40        | -0.0017574 | 0.0256819 | -0.0670721 | 0.0635574  |
| Full   | Audience outdegree | -39        | -0.0079069 | 0.0306436 | -0.0858405 | 0.0700267  |
| Full   | Audience outdegree | -38        | -0.0207668 | 0.0217921 | -0.0761890 | 0.0346553  |
| Full   | Audience outdegree | -37        | -0.0052974 | 0.0170293 | -0.0486066 | 0.0380118  |
| Full   | Audience outdegree | -36        | 0.0742614  | 0.0221514 | 0.0179253  | 0.1305974  |
| Full   | Audience outdegree | -35        | 0.1772251  | 0.0144274 | 0.1405331  | 0.2139172  |
| Full   | Audience outdegree | -34        | 0.1591147  | 0.0204709 | 0.1070527  | 0.2111768  |
| Full   | Audience outdegree | -33        | 0.0529281  | 0.0391570 | -0.0466570 | 0.1525131  |
| Full   | Audience outdegree | -32        | 0.0657546  | 0.0141360 | 0.0298036  | 0.1017056  |
| Full   | Audience outdegree | -31        | -0.0878373 | 0.0156336 | -0.1275969 | -0.0480776 |
| Full   | Audience outdegree | -30        | 0.1244937  | 0.0288425 | 0.0511408  | 0.1978466  |
| Full   | Audience outdegree | -29        | -0.0068463 | 0.0091765 | -0.0301842 | 0.0164917  |
| Full   | Audience outdegree | -28        | -0.0506058 | 0.0111754 | -0.0790275 | -0.0221842 |
| Full   | Audience outdegree | -27        | 0.0037524  | 0.0442295 | -0.1087329 | 0.1162378  |
| Full   | Audience outdegree | -26        | 0.0095456  | 0.0260384 | -0.0566760 | 0.0757671  |

|      |                    |     |            |           |            |            |
|------|--------------------|-----|------------|-----------|------------|------------|
| Full | Audience outdegree | -25 | 0.0060423  | 0.0288003 | -0.0672031 | 0.0792878  |
| Full | Audience outdegree | -24 | -0.0900859 | 0.0109742 | -0.1179956 | -0.0621761 |
| Full | Audience outdegree | -23 | -0.0157221 | 0.0138733 | -0.0510051 | 0.0195609  |
| Full | Audience outdegree | -22 | 0.0193892  | 0.0167555 | -0.0232236 | 0.0620021  |
| Full | Audience outdegree | -21 | -0.0406875 | 0.0166314 | -0.0829849 | 0.0016099  |
| Full | Audience outdegree | -20 | -0.0349794 | 0.0288260 | -0.1082903 | 0.0383315  |
| Full | Audience outdegree | -19 | -0.0141819 | 0.0330304 | -0.0981856 | 0.0698217  |
| Full | Audience outdegree | -18 | -0.0643430 | 0.0081535 | -0.0850790 | -0.0436069 |
| Full | Audience outdegree | -17 | 0.0060454  | 0.0200634 | -0.0449803 | 0.0570712  |
| Full | Audience outdegree | -16 | -0.0265947 | 0.0240363 | -0.0877244 | 0.0345351  |
| Full | Audience outdegree | -15 | 0.0445788  | 0.0198555 | -0.0059182 | 0.0950758  |
| Full | Audience outdegree | -14 | 0.0493511  | 0.0194416 | -0.0000932 | 0.0987953  |
| Full | Audience outdegree | -13 | 0.0020822  | 0.0231802 | -0.0568702 | 0.0610345  |
| Full | Audience outdegree | -12 | 0.0212453  | 0.0119164 | -0.0090607 | 0.0515513  |
| Full | Audience outdegree | -11 | 0.0002697  | 0.0246000 | -0.0622935 | 0.0628329  |
| Full | Audience outdegree | -10 | -0.0025539 | 0.0225007 | -0.0597783 | 0.0546705  |
| Full | Audience outdegree | -9  | -0.0057960 | 0.0326766 | -0.0889000 | 0.0773079  |
| Full | Audience outdegree | -8  | -0.0069608 | 0.0182188 | -0.0532952 | 0.0393736  |
| Full | Audience outdegree | -7  | -0.0293415 | 0.0150073 | -0.0675083 | 0.0088253  |
| Full | Audience outdegree | -6  | 0.0033663  | 0.0178959 | -0.0421470 | 0.0488796  |
| Full | Audience outdegree | -5  | -0.0050950 | 0.0209062 | -0.0582640 | 0.0480740  |
| Full | Audience outdegree | -4  | 0.0025426  | 0.0148795 | -0.0352994 | 0.0403845  |
| Full | Audience outdegree | -3  | -0.0788616 | 0.0241160 | -0.1401938 | -0.0175294 |
| Full | Audience outdegree | -2  | 0.0360242  | 0.0141588 | 0.0000152  | 0.0720332  |
| Full | Audience outdegree | -1  | 0.0293343  | 0.0290260 | -0.0444854 | 0.1031540  |
| Full | Audience outdegree | 0   | -0.1094732 | 0.0197401 | -0.1596768 | -0.0592697 |
| Full | Audience outdegree | 1   | -0.1643267 | 0.0351806 | -0.2537988 | -0.0748546 |
| Full | Audience outdegree | 2   | -0.1658208 | 0.0452533 | -0.2809101 | -0.0507316 |
| Full | Audience outdegree | 3   | -0.1586341 | 0.0522895 | -0.2916179 | -0.0256503 |
| Full | Audience outdegree | 4   | -0.1339740 | 0.0506754 | -0.2628528 | -0.0050952 |
| Full | Audience outdegree | 5   | -0.1435545 | 0.0522630 | -0.2764709 | -0.0106381 |
| Full | Audience outdegree | 6   | -0.1915435 | 0.0481844 | -0.3140872 | -0.0689998 |
| Full | Audience outdegree | 7   | -0.1514718 | 0.0528489 | -0.2858784 | -0.0170653 |
| Full | Audience outdegree | 8   | -0.1570254 | 0.0478061 | -0.2786069 | -0.0354439 |
| Full | Audience outdegree | 9   | -0.1633546 | 0.0594755 | -0.3146140 | -0.0120952 |
| Full | Audience outdegree | 10  | -0.1764919 | 0.0666738 | -0.3460582 | -0.0069256 |
| Full | Audience outdegree | 11  | -0.1528224 | 0.0797128 | -0.3555496 | 0.0499049  |
| Full | Audience outdegree | 12  | -0.1534686 | 0.0722159 | -0.3371297 | 0.0301925  |
| Full | Audience outdegree | 13  | -0.2205641 | 0.0634412 | -0.3819092 | -0.0592190 |
| Full | Audience outdegree | 14  | -0.1638233 | 0.0855909 | -0.3815000 | 0.0538533  |
| Full | Audience outdegree | 15  | 0.0341751  | 0.1161485 | -0.2612163 | 0.3295665  |

|      |                    |    |            |           |            |            |
|------|--------------------|----|------------|-----------|------------|------------|
| Full | Audience outdegree | 16 | 0.0407094  | 0.1270788 | -0.2824802 | 0.3638990  |
| Full | Audience outdegree | 17 | 0.0822033  | 0.1589854 | -0.3221317 | 0.4865384  |
| Full | Audience outdegree | 18 | 0.1290361  | 0.1483938 | -0.2483622 | 0.5064343  |
| Full | Audience outdegree | 19 | 0.0024392  | 0.1272764 | -0.3212530 | 0.3261314  |
| Full | Audience outdegree | 20 | -0.2009980 | 0.1027718 | -0.4623695 | 0.0603735  |
| Full | Audience outdegree | 21 | -0.2049518 | 0.0881576 | -0.4291563 | 0.0192526  |
| Full | Audience outdegree | 22 | -0.1882781 | 0.0905136 | -0.4184743 | 0.0419182  |
| Full | Audience outdegree | 23 | -0.2340852 | 0.0878303 | -0.4574573 | -0.0107132 |
| Full | Audience outdegree | 24 | -0.1850335 | 0.1120677 | -0.4700466 | 0.0999796  |
| Full | Audience outdegree | 25 | -0.2285362 | 0.0949954 | -0.4701305 | 0.0130581  |
| Full | Audience outdegree | 26 | -0.2531146 | 0.0716728 | -0.4353944 | -0.0708348 |
| Full | Audience outdegree | 27 | -0.3037247 | 0.0442656 | -0.4163018 | -0.1911475 |
| Full | Audience outdegree | 28 | -0.3078686 | 0.0556114 | -0.4493007 | -0.1664366 |
| Full | Audience outdegree | 29 | -0.1941456 | 0.0724026 | -0.3782814 | -0.0100097 |
| Full | Audience outdegree | 30 | -0.2331406 | 0.1065436 | -0.5041047 | 0.0378235  |
| Full | Audience outdegree | 31 | -0.2264422 | 0.1857537 | -0.6988552 | 0.2459708  |
| Full | Audience outdegree | 32 | -0.2439495 | 0.1617232 | -0.6552476 | 0.1673485  |
| Full | Audience outdegree | 33 | -0.2341482 | 0.1325358 | -0.5712163 | 0.1029198  |
| Full | Audience outdegree | 34 | -0.2047786 | 0.1089683 | -0.4819092 | 0.0723520  |
| Full | Audience outdegree | 35 | -0.1902525 | 0.0921743 | -0.4246721 | 0.0441671  |
| Full | Audience outdegree | 36 | -0.1931683 | 0.0734350 | -0.3799298 | -0.0064069 |
| Full | Audience outdegree | 37 | -0.2095179 | 0.0915469 | -0.4423420 | 0.0233062  |
| Full | Audience outdegree | 38 | -0.1848018 | 0.0798968 | -0.3879970 | 0.0183934  |
| Full | Audience outdegree | 39 | -0.1966933 | 0.0995730 | -0.4499295 | 0.0565429  |
| Full | Audience outdegree | 40 | -0.1957924 | 0.1070247 | -0.4679800 | 0.0763953  |
| Full | Audience outdegree | 41 | -0.2095590 | 0.0906963 | -0.4402198 | 0.0211019  |
| Full | Audience outdegree | 42 | -0.2170078 | 0.1608709 | -0.6261382 | 0.1921226  |
| Full | Audience outdegree | 43 | -0.5794009 | 0.2718770 | -1.2708446 | 0.1120427  |
| Full | Audience outdegree | 44 | -0.5342123 | 0.3173646 | -1.3413409 | 0.2729164  |
| Full | Audience outdegree | 45 | -0.5691424 | 0.1965184 | -1.0689323 | -0.0693525 |
| Full | Audience outdegree | 47 | -0.2176815 | 0.0313104 | -0.2973109 | -0.1380521 |
| Full | Audience outdegree | 48 | -0.1977778 | 0.0272640 | -0.2671161 | -0.1284394 |
| Full | Audience outdegree | 49 | -0.2074147 | 0.0274911 | -0.2773306 | -0.1374988 |
| Full | Audience outdegree | 50 | -0.2149642 | 0.0274911 | -0.2848801 | -0.1450483 |
| Full | Audience outdegree | 51 | -0.3093598 | 0.1723315 | -0.7476370 | 0.1289174  |
| Full | Audience outdegree | 52 | -0.2937141 | 0.1476884 | -0.6693184 | 0.0818902  |
| Full | Audience outdegree | 53 | -0.2833144 | 0.1811969 | -0.7441384 | 0.1775096  |
| Full | Audience outdegree | 54 | -0.2782749 | 0.1524368 | -0.6659554 | 0.1094056  |
| Full | Audience outdegree | 55 | -0.2976763 | 0.1589785 | -0.7019939 | 0.1066413  |
| Full | Audience outdegree | 56 | -0.5968921 | 0.1129892 | -0.8842486 | -0.3095356 |
| Full | Audience outdegree | 57 | -0.5505236 | 0.1467899 | -0.9238428 | -0.1772044 |



|      |                    |    |            |           |            |            |
|------|--------------------|----|------------|-----------|------------|------------|
| Full | Audience outdegree | 58 | -0.6001748 | 0.2245363 | -1.1712203 | -0.0291293 |
| Full | Audience outdegree | 59 | -0.6334635 | 0.2494381 | -1.2678399 | 0.0009128  |

| sample | outcome            | event.time | estimate   | std.error | conf.low   | conf.high  |
|--------|--------------------|------------|------------|-----------|------------|------------|
| Most   | Audience outdegree | -44        | 0.0214033  | 0.0330872 | -0.0652096 | 0.1080162  |
| Most   | Audience outdegree | -43        | 0.0588841  | 0.0469153 | -0.0639269 | 0.1816952  |
| Most   | Audience outdegree | -42        | 0.1489487  | 0.0486196 | 0.0216764  | 0.2762210  |
| Most   | Audience outdegree | -41        | -0.1047654 | 0.0328448 | -0.1907437 | -0.0187871 |
| Most   | Audience outdegree | -40        | -0.0740188 | 0.0636302 | -0.2405847 | 0.0925472  |
| Most   | Audience outdegree | -39        | -0.0334541 | 0.0847387 | -0.2552762 | 0.1883681  |
| Most   | Audience outdegree | -38        | -0.0764618 | 0.0610147 | -0.2361811 | 0.0832575  |
| Most   | Audience outdegree | -37        | 0.0503992  | 0.0215442 | -0.0059975 | 0.1067959  |
| Most   | Audience outdegree | -36        | 0.2207567  | 0.0450665 | 0.1027853  | 0.3387281  |
| Most   | Audience outdegree | -35        | 0.2732780  | 0.0682971 | 0.0944953  | 0.4520606  |
| Most   | Audience outdegree | -34        | 0.2854065  | 0.0638813 | 0.1181833  | 0.4526297  |
| Most   | Audience outdegree | -33        | -0.0922653 | 0.0558892 | -0.2385675 | 0.0540368  |
| Most   | Audience outdegree | -32        | 0.2007368  | 0.0376151 | 0.1022710  | 0.2992026  |
| Most   | Audience outdegree | -31        | -0.0556239 | 0.0359900 | -0.1498355 | 0.0385876  |
| Most   | Audience outdegree | -30        | 0.0409458  | 0.0407633 | -0.0657610 | 0.1476526  |
| Most   | Audience outdegree | -29        | -0.0589282 | 0.0301319 | -0.1378049 | 0.0199485  |
| Most   | Audience outdegree | -28        | -0.0939244 | 0.0294648 | -0.1710548 | -0.0167940 |
| Most   | Audience outdegree | -27        | -0.0596302 | 0.0543457 | -0.2018920 | 0.0826316  |
| Most   | Audience outdegree | -26        | -0.0814074 | 0.0584297 | -0.2343599 | 0.0715451  |
| Most   | Audience outdegree | -25        | 0.1317862  | 0.1036681 | -0.1395875 | 0.4031600  |
| Most   | Audience outdegree | -24        | -0.2096512 | 0.0481740 | -0.3357570 | -0.0835453 |
| Most   | Audience outdegree | -23        | -0.0959286 | 0.0118800 | -0.1270270 | -0.0648302 |
| Most   | Audience outdegree | -22        | -0.0584272 | 0.0270253 | -0.1291717 | 0.0123174  |
| Most   | Audience outdegree | -21        | 0.0122195  | 0.0448237 | -0.1051164 | 0.1295554  |
| Most   | Audience outdegree | -20        | -0.1094779 | 0.0780983 | -0.3139172 | 0.0949615  |
| Most   | Audience outdegree | -19        | -0.0820432 | 0.0634040 | -0.2480170 | 0.0839307  |
| Most   | Audience outdegree | -18        | 0.0170189  | 0.0303468 | -0.0624205 | 0.0964582  |
| Most   | Audience outdegree | -17        | -0.0627322 | 0.0393745 | -0.1658036 | 0.0403392  |
| Most   | Audience outdegree | -16        | -0.0184743 | 0.0620325 | -0.1808579 | 0.1439093  |
| Most   | Audience outdegree | -15        | 0.1003707  | 0.0415950 | -0.0085133 | 0.2092547  |
| Most   | Audience outdegree | -14        | 0.0584477  | 0.0304217 | -0.0211876 | 0.1380830  |
| Most   | Audience outdegree | -13        | 0.0529031  | 0.0252707 | -0.0132484 | 0.1190546  |
| Most   | Audience outdegree | -12        | 0.0432295  | 0.0502042 | -0.0881911 | 0.1746500  |
| Most   | Audience outdegree | -11        | -0.0732992 | 0.0601498 | -0.2307545 | 0.0841560  |
| Most   | Audience outdegree | -10        | 0.0641663  | 0.0410885 | -0.0433917 | 0.1717244  |
| Most   | Audience outdegree | -9         | 0.0077301  | 0.0721490 | -0.1811356 | 0.1965958  |
| Most   | Audience outdegree | -8         | -0.0856950 | 0.0424675 | -0.1968629 | 0.0254729  |

|      |                    |    |            |           |            |            |
|------|--------------------|----|------------|-----------|------------|------------|
| Most | Audience outdegree | -7 | -0.0051455 | 0.0421190 | -0.1154011 | 0.1051101  |
| Most | Audience outdegree | -6 | 0.0499754  | 0.0192996 | -0.0005456 | 0.1004963  |
| Most | Audience outdegree | -5 | 0.0433694  | 0.0667650 | -0.1314025 | 0.2181414  |
| Most | Audience outdegree | -4 | -0.0832664 | 0.0589233 | -0.2375111 | 0.0709783  |
| Most | Audience outdegree | -3 | -0.0477276 | 0.0599588 | -0.2046829 | 0.1092276  |
| Most | Audience outdegree | -2 | 0.1287551  | 0.0325169 | 0.0436351  | 0.2138752  |
| Most | Audience outdegree | -1 | -0.0168192 | 0.0458405 | -0.1368166 | 0.1031783  |
| Most | Audience outdegree | 0  | -0.1557379 | 0.0461691 | -0.2765955 | -0.0348803 |
| Most | Audience outdegree | 1  | -0.2652987 | 0.0560245 | -0.4119551 | -0.1186423 |
| Most | Audience outdegree | 2  | -0.2382637 | 0.0715889 | -0.4256631 | -0.0508642 |
| Most | Audience outdegree | 3  | -0.2163456 | 0.0701873 | -0.4000763 | -0.0326150 |
| Most | Audience outdegree | 4  | -0.1346206 | 0.0755217 | -0.3323151 | 0.0630740  |
| Most | Audience outdegree | 5  | -0.1727828 | 0.0856957 | -0.3971099 | 0.0515443  |
| Most | Audience outdegree | 6  | -0.2746161 | 0.0946244 | -0.5223161 | -0.0269160 |
| Most | Audience outdegree | 7  | -0.2117922 | 0.0793395 | -0.4194806 | -0.0041038 |
| Most | Audience outdegree | 8  | -0.1654229 | 0.0913477 | -0.4045453 | 0.0736996  |
| Most | Audience outdegree | 9  | -0.2082876 | 0.1128421 | -0.5036764 | 0.0871013  |
| Most | Audience outdegree | 10 | -0.2721658 | 0.1210431 | -0.5890224 | 0.0446908  |
| Most | Audience outdegree | 11 | -0.2525912 | 0.1393112 | -0.6172686 | 0.1120862  |
| Most | Audience outdegree | 12 | -0.2268520 | 0.1249904 | -0.5540416 | 0.1003377  |
| Most | Audience outdegree | 13 | -0.2972194 | 0.1350210 | -0.6506664 | 0.0562275  |
| Most | Audience outdegree | 14 | -0.2104804 | 0.1472066 | -0.5958256 | 0.1748649  |
| Most | Audience outdegree | 15 | 0.0981109  | 0.1752093 | -0.3605377 | 0.5567596  |
| Most | Audience outdegree | 16 | 0.0970999  | 0.1864527 | -0.3909806 | 0.5851804  |
| Most | Audience outdegree | 17 | 0.1583478  | 0.2216345 | -0.4218287 | 0.7385243  |
| Most | Audience outdegree | 18 | 0.2822430  | 0.2212461 | -0.2969169 | 0.8614030  |
| Most | Audience outdegree | 19 | 0.1297965  | 0.2195298 | -0.4448707 | 0.7044637  |
| Most | Audience outdegree | 20 | -0.3114513 | 0.1652590 | -0.7440528 | 0.1211503  |
| Most | Audience outdegree | 21 | -0.2693623 | 0.1600848 | -0.6884193 | 0.1496947  |
| Most | Audience outdegree | 22 | -0.1748192 | 0.1576552 | -0.5875160 | 0.2378776  |
| Most | Audience outdegree | 23 | -0.3070124 | 0.1535960 | -0.7090833 | 0.0950586  |
| Most | Audience outdegree | 24 | -0.2967735 | 0.1877105 | -0.7881467 | 0.1945996  |
| Most | Audience outdegree | 25 | -0.3351606 | 0.1469817 | -0.7199172 | 0.0495960  |
| Most | Audience outdegree | 26 | -0.3143886 | 0.1442798 | -0.6920724 | 0.0632952  |
| Most | Audience outdegree | 27 | -0.4343825 | 0.0828517 | -0.6512648 | -0.2175002 |
| Most | Audience outdegree | 28 | -0.4833575 | 0.1128738 | -0.7788292 | -0.1878858 |
| Most | Audience outdegree | 29 | -0.2624736 | 0.1371338 | -0.6214512 | 0.0965040  |
| Most | Audience outdegree | 30 | -0.2558417 | 0.1472564 | -0.6413174 | 0.1296341  |
| Most | Audience outdegree | 31 | -0.4987982 | 0.3291899 | -1.3605245 | 0.3629280  |
| Most | Audience outdegree | 32 | -0.4731965 | 0.2474611 | -1.1209798 | 0.1745869  |
| Most | Audience outdegree | 33 | -0.4805028 | 0.1840670 | -0.9623381 | 0.0013326  |

|      |                    |    |            |           |            |            |
|------|--------------------|----|------------|-----------|------------|------------|
| Most | Audience outdegree | 34 | -0.4040231 | 0.1679111 | -0.8435669 | 0.0355208  |
| Most | Audience outdegree | 35 | -0.3498828 | 0.1213127 | -0.6674453 | -0.0323203 |
| Most | Audience outdegree | 36 | -0.3647412 | 0.1587185 | -0.7802215 | 0.0507391  |
| Most | Audience outdegree | 37 | -0.3996252 | 0.1490572 | -0.7898149 | -0.0094355 |
| Most | Audience outdegree | 38 | -0.3637216 | 0.1069621 | -0.6437183 | -0.0837248 |
| Most | Audience outdegree | 39 | -0.3759471 | 0.1360239 | -0.7320193 | -0.0198749 |
| Most | Audience outdegree | 40 | -0.3437837 | 0.2129657 | -0.9012679 | 0.2137005  |
| Most | Audience outdegree | 41 | -0.3893738 | 0.1767902 | -0.8521606 | 0.0734130  |
| Most | Audience outdegree | 42 | -0.3666578 | 0.2629385 | -1.0549567 | 0.3216410  |
| Most | Audience outdegree | 43 | -0.9455959 | 0.3456394 | -1.8503822 | -0.0408095 |
| Most | Audience outdegree | 44 | -0.8670038 | 0.4011008 | -1.9169726 | 0.1829650  |
| Most | Audience outdegree | 45 | -0.7810881 | 0.5340368 | -2.1790459 | 0.6168697  |
| Most | Audience outdegree | 47 | -0.3633104 | 0.0063695 | -0.3799839 | -0.3466369 |
| Most | Audience outdegree | 48 | -0.3416126 | 0.0069698 | -0.3598576 | -0.3233675 |
| Most | Audience outdegree | 49 | -0.3575156 | 0.0070279 | -0.3759126 | -0.3391185 |
| Most | Audience outdegree | 50 | -0.3952934 | 0.0070279 | -0.4136904 | -0.3768963 |
| Most | Audience outdegree | 51 | -0.6185800 | 0.3098625 | -1.4297127 | 0.1925526  |
| Most | Audience outdegree | 52 | -0.5768813 | 0.2967146 | -1.3535964 | 0.1998338  |
| Most | Audience outdegree | 53 | -0.5509533 | 0.3020069 | -1.3415222 | 0.2396156  |
| Most | Audience outdegree | 54 | -0.5617921 | 0.2423790 | -1.1962721 | 0.0726878  |
| Most | Audience outdegree | 55 | -0.5463242 | 0.3100545 | -1.3579594 | 0.2653110  |
| Most | Audience outdegree | 56 | -0.8924622 | 0.3942841 | -1.9245868 | 0.1396624  |
| Most | Audience outdegree | 57 | -0.8069700 | 0.1604520 | -1.2269880 | -0.3869520 |
| Most | Audience outdegree | 58 | -0.9105969 | 0.2852645 | -1.6573389 | -0.1638549 |
| Most | Audience outdegree | 59 | -0.9114688 | 0.3502314 | -1.8282757 | 0.0053382  |

| sample | outcome            | event.time | estimate   | std.error | conf.low   | conf.high  |
|--------|--------------------|------------|------------|-----------|------------|------------|
| Middle | Audience outdegree | -44        | 0.0034340  | 0.0403007 | -0.1126345 | 0.1195025  |
| Middle | Audience outdegree | -43        | 0.0495479  | 0.0251891 | -0.0229983 | 0.1220941  |
| Middle | Audience outdegree | -42        | 0.0125536  | 0.0182191 | -0.0399186 | 0.0650257  |
| Middle | Audience outdegree | -41        | -0.0300232 | 0.0220683 | -0.0935811 | 0.0335348  |
| Middle | Audience outdegree | -40        | 0.0016707  | 0.0286784 | -0.0809248 | 0.0842663  |
| Middle | Audience outdegree | -39        | 0.0304581  | 0.0106139 | -0.0001105 | 0.0610267  |
| Middle | Audience outdegree | -38        | 0.0016150  | 0.0220355 | -0.0618487 | 0.0650786  |
| Middle | Audience outdegree | -37        | -0.0620497 | 0.0097906 | -0.0902471 | -0.0338522 |
| Middle | Audience outdegree | -36        | 0.0497699  | 0.0222179 | -0.0142189 | 0.1137588  |
| Middle | Audience outdegree | -35        | 0.2307009  | 0.0231850 | 0.1639265  | 0.2974753  |
| Middle | Audience outdegree | -34        | 0.1829215  | 0.0233930 | 0.1155480  | 0.2502950  |
| Middle | Audience outdegree | -33        | 0.1251996  | 0.0366176 | 0.0197386  | 0.2306606  |
| Middle | Audience outdegree | -32        | 0.0315275  | 0.0158349 | -0.0140780 | 0.0771330  |
| Middle | Audience outdegree | -31        | -0.1480363 | 0.0195217 | -0.2042601 | -0.0918125 |

|        |                    |     |            |           |            |            |
|--------|--------------------|-----|------------|-----------|------------|------------|
| Middle | Audience outdegree | -30 | 0.1459144  | 0.0371721 | 0.0388565  | 0.2529722  |
| Middle | Audience outdegree | -29 | -0.0164830 | 0.0140833 | -0.0570437 | 0.0240777  |
| Middle | Audience outdegree | -28 | -0.0605208 | 0.0106551 | -0.0912080 | -0.0298336 |
| Middle | Audience outdegree | -27 | 0.0214531  | 0.0474873 | -0.1153133 | 0.1582194  |
| Middle | Audience outdegree | -26 | -0.0212454 | 0.0216115 | -0.0834877 | 0.0409970  |
| Middle | Audience outdegree | -25 | -0.0184557 | 0.0164952 | -0.0659628 | 0.0290514  |
| Middle | Audience outdegree | -24 | -0.0930738 | 0.0175049 | -0.1434889 | -0.0426586 |
| Middle | Audience outdegree | -23 | -0.0215394 | 0.0080436 | -0.0447055 | 0.0016268  |
| Middle | Audience outdegree | -22 | 0.0553035  | 0.0220099 | -0.0080866 | 0.1186935  |
| Middle | Audience outdegree | -21 | -0.0778225 | 0.0223699 | -0.1422492 | -0.0133957 |
| Middle | Audience outdegree | -20 | -0.0396715 | 0.0247683 | -0.1110058 | 0.0316627  |
| Middle | Audience outdegree | -19 | 0.0435123  | 0.0433863 | -0.0814429 | 0.1684676  |
| Middle | Audience outdegree | -18 | -0.1057212 | 0.0223206 | -0.1700060 | -0.0414364 |
| Middle | Audience outdegree | -17 | 0.0603393  | 0.0287861 | -0.0225666 | 0.1432452  |
| Middle | Audience outdegree | -16 | -0.0409991 | 0.0230183 | -0.1072933 | 0.0252951  |
| Middle | Audience outdegree | -15 | 0.0088273  | 0.0131945 | -0.0291736 | 0.0468283  |
| Middle | Audience outdegree | -14 | 0.0588312  | 0.0163694 | 0.0116864  | 0.1059760  |
| Middle | Audience outdegree | -13 | -0.0372577 | 0.0380566 | -0.1468631 | 0.0723476  |
| Middle | Audience outdegree | -12 | 0.0668321  | 0.0101256 | 0.0376696  | 0.0959945  |
| Middle | Audience outdegree | -11 | -0.0023734 | 0.0242688 | -0.0722690 | 0.0675222  |
| Middle | Audience outdegree | -10 | -0.0309415 | 0.0337248 | -0.1280712 | 0.0661881  |
| Middle | Audience outdegree | -9  | -0.0016128 | 0.0227605 | -0.0671643 | 0.0639388  |
| Middle | Audience outdegree | -8  | 0.0154194  | 0.0172528 | -0.0342697 | 0.0651084  |
| Middle | Audience outdegree | -7  | -0.0408267 | 0.0144348 | -0.0823999 | 0.0007465  |
| Middle | Audience outdegree | -6  | -0.0002231 | 0.0138743 | -0.0401819 | 0.0397358  |
| Middle | Audience outdegree | -5  | -0.0104241 | 0.0207159 | -0.0700873 | 0.0492390  |
| Middle | Audience outdegree | -4  | -0.0085813 | 0.0239586 | -0.0775835 | 0.0604209  |
| Middle | Audience outdegree | -3  | -0.1145114 | 0.0224013 | -0.1790286 | -0.0499943 |
| Middle | Audience outdegree | -2  | 0.0510308  | 0.0117270 | 0.0172562  | 0.0848055  |
| Middle | Audience outdegree | -1  | 0.0841631  | 0.0339780 | -0.0136958 | 0.1820220  |
| Middle | Audience outdegree | 0   | -0.1234671 | 0.0222260 | -0.1874795 | -0.0594548 |
| Middle | Audience outdegree | 1   | -0.1563880 | 0.0387955 | -0.2681214 | -0.0446546 |
| Middle | Audience outdegree | 2   | -0.1842387 | 0.0453505 | -0.3148511 | -0.0536264 |
| Middle | Audience outdegree | 3   | -0.1966503 | 0.0462266 | -0.3297858 | -0.0635147 |
| Middle | Audience outdegree | 4   | -0.1591381 | 0.0600098 | -0.3319701 | 0.0136939  |
| Middle | Audience outdegree | 5   | -0.1484171 | 0.0468797 | -0.2834337 | -0.0134005 |
| Middle | Audience outdegree | 6   | -0.2050620 | 0.0446526 | -0.3336645 | -0.0764596 |
| Middle | Audience outdegree | 7   | -0.1510970 | 0.0527825 | -0.3031141 | 0.0009200  |
| Middle | Audience outdegree | 8   | -0.1926442 | 0.0490143 | -0.3338086 | -0.0514798 |
| Middle | Audience outdegree | 9   | -0.2058352 | 0.0422658 | -0.3275633 | -0.0841070 |
| Middle | Audience outdegree | 10  | -0.1525955 | 0.0529513 | -0.3050987 | -0.0000922 |

|        |                    |    |            |           |            |            |
|--------|--------------------|----|------------|-----------|------------|------------|
| Middle | Audience outdegree | 11 | -0.1346710 | 0.0687293 | -0.3326158 | 0.0632738  |
| Middle | Audience outdegree | 12 | -0.1394051 | 0.0692949 | -0.3389788 | 0.0601686  |
| Middle | Audience outdegree | 13 | -0.2229638 | 0.0603087 | -0.3966569 | -0.0492708 |
| Middle | Audience outdegree | 14 | -0.1729979 | 0.0653539 | -0.3612213 | 0.0152256  |
| Middle | Audience outdegree | 15 | -0.0253619 | 0.0542647 | -0.1816476 | 0.1309239  |
| Middle | Audience outdegree | 16 | -0.0091878 | 0.0769653 | -0.2308527 | 0.2124771  |
| Middle | Audience outdegree | 17 | 0.0843951  | 0.1173292 | -0.2535206 | 0.4223107  |
| Middle | Audience outdegree | 18 | 0.0870168  | 0.1290746 | -0.2847262 | 0.4587598  |
| Middle | Audience outdegree | 19 | -0.0358493 | 0.1180162 | -0.3757436 | 0.3040449  |
| Middle | Audience outdegree | 20 | -0.1886439 | 0.0805685 | -0.4206864 | 0.0433986  |
| Middle | Audience outdegree | 21 | -0.1717975 | 0.0668416 | -0.3643055 | 0.0207105  |
| Middle | Audience outdegree | 22 | -0.1856617 | 0.0711794 | -0.3906628 | 0.0193393  |
| Middle | Audience outdegree | 23 | -0.2089089 | 0.0815273 | -0.4437129 | 0.0258950  |
| Middle | Audience outdegree | 24 | -0.1202723 | 0.0956724 | -0.3958149 | 0.1552703  |
| Middle | Audience outdegree | 25 | -0.1989995 | 0.0918454 | -0.4635200 | 0.0655209  |
| Middle | Audience outdegree | 26 | -0.2382473 | 0.0612661 | -0.4146975 | -0.0617971 |
| Middle | Audience outdegree | 27 | -0.2420757 | 0.0448211 | -0.3711632 | -0.1129882 |
| Middle | Audience outdegree | 28 | -0.2455992 | 0.0580397 | -0.4127573 | -0.0784410 |
| Middle | Audience outdegree | 29 | -0.1423015 | 0.0459405 | -0.2746131 | -0.0099898 |
| Middle | Audience outdegree | 30 | -0.1911183 | 0.0823017 | -0.4281524 | 0.0459158  |
| Middle | Audience outdegree | 31 | -0.1669958 | 0.1543191 | -0.6114446 | 0.2774530  |
| Middle | Audience outdegree | 32 | -0.1890542 | 0.1421787 | -0.5985380 | 0.2204296  |
| Middle | Audience outdegree | 33 | -0.1617103 | 0.0972449 | -0.4417817 | 0.1183612  |
| Middle | Audience outdegree | 34 | -0.1495668 | 0.0664060 | -0.3408203 | 0.0416867  |
| Middle | Audience outdegree | 35 | -0.1351195 | 0.0901549 | -0.3947714 | 0.1245325  |
| Middle | Audience outdegree | 36 | -0.1402436 | 0.0702827 | -0.3426622 | 0.0621750  |
| Middle | Audience outdegree | 37 | -0.1454101 | 0.0683530 | -0.3422711 | 0.0514508  |
| Middle | Audience outdegree | 38 | -0.1234304 | 0.0724255 | -0.3320203 | 0.0851596  |
| Middle | Audience outdegree | 39 | -0.1378391 | 0.0750360 | -0.3539474 | 0.0782693  |
| Middle | Audience outdegree | 40 | -0.1661542 | 0.0347325 | -0.2661860 | -0.0661224 |
| Middle | Audience outdegree | 41 | -0.1507569 | 0.0718890 | -0.3578018 | 0.0562880  |
| Middle | Audience outdegree | 42 | -0.1719423 | 0.1319192 | -0.5518781 | 0.2079935  |
| Middle | Audience outdegree | 43 | -0.4613861 | 0.0109963 | -0.4930561 | -0.4297162 |
| Middle | Audience outdegree | 44 | -0.4011084 | 0.0698758 | -0.6023551 | -0.1998616 |
| Middle | Audience outdegree | 45 | -0.5336634 | 0.0630305 | -0.7151952 | -0.3521315 |
| Middle | Audience outdegree | 47 | -0.1940872 | 0.0110982 | -0.2260507 | -0.1621236 |
| Middle | Audience outdegree | 48 | -0.1700020 | 0.0071688 | -0.1906486 | -0.1493555 |
| Middle | Audience outdegree | 49 | -0.1887054 | 0.0122454 | -0.2239731 | -0.1534378 |
| Middle | Audience outdegree | 50 | -0.1744928 | 0.0122454 | -0.2097604 | -0.1392252 |
| Middle | Audience outdegree | 51 | -0.2613127 | 0.1105990 | -0.5798448 | 0.0572193  |
| Middle | Audience outdegree | 52 | -0.2399910 | 0.0974348 | -0.5206095 | 0.0406275  |

|        |                    |    |            |           |            |            |
|--------|--------------------|----|------------|-----------|------------|------------|
| Middle | Audience outdegree | 53 | -0.2217397 | 0.1037787 | -0.5206290 | 0.0771495  |
| Middle | Audience outdegree | 54 | -0.2212980 | 0.1356965 | -0.6121127 | 0.1695166  |
| Middle | Audience outdegree | 55 | -0.2537775 | 0.0892485 | -0.5108189 | 0.0032639  |
| Middle | Audience outdegree | 56 | -0.4845132 | 0.2347893 | -1.1607212 | 0.1916948  |
| Middle | Audience outdegree | 57 | -0.4884736 | 0.0877965 | -0.7413332 | -0.2356140 |
| Middle | Audience outdegree | 58 | -0.4558003 | 0.1363511 | -0.8485003 | -0.0631004 |
| Middle | Audience outdegree | 59 | -0.5764741 | 0.1420701 | -0.9856449 | -0.1673034 |

| sample | outcome            | event.time | estimate   | std.error | conf.low   | conf.high  |
|--------|--------------------|------------|------------|-----------|------------|------------|
| Least  | Audience outdegree | -44        | -0.0329544 | 0.0221672 | -0.0873662 | 0.0214575  |
| Least  | Audience outdegree | -43        | 0.0337181  | 0.0681691 | -0.1336110 | 0.2010471  |
| Least  | Audience outdegree | -42        | 0.0516192  | 0.0204537 | 0.0014132  | 0.1018252  |
| Least  | Audience outdegree | -41        | -0.0462271 | 0.0255230 | -0.1088762 | 0.0164220  |
| Least  | Audience outdegree | -40        | 0.0375477  | 0.0170343 | -0.0042649 | 0.0793604  |
| Least  | Audience outdegree | -39        | -0.0260929 | 0.0147195 | -0.0622235 | 0.0100378  |
| Least  | Audience outdegree | -38        | -0.0120619 | 0.0174260 | -0.0548361 | 0.0307123  |
| Least  | Audience outdegree | -37        | 0.0242531  | 0.0490147 | -0.0960591 | 0.1445653  |
| Least  | Audience outdegree | -36        | 0.0128990  | 0.0302829 | -0.0614338 | 0.0872318  |
| Least  | Audience outdegree | -35        | 0.0517189  | 0.0772320 | -0.1378559 | 0.2412937  |
| Least  | Audience outdegree | -34        | 0.0528365  | 0.0234779 | -0.0047928 | 0.1104659  |
| Least  | Audience outdegree | -33        | 0.0934369  | 0.0510332 | -0.0318300 | 0.2187039  |
| Least  | Audience outdegree | -32        | 0.0191897  | 0.0268069 | -0.0466111 | 0.0849904  |
| Least  | Audience outdegree | -31        | -0.0322350 | 0.0121734 | -0.0621160 | -0.0023540 |
| Least  | Audience outdegree | -30        | 0.1673039  | 0.0321986 | 0.0882686  | 0.2463392  |
| Least  | Audience outdegree | -29        | 0.0312288  | 0.0264510 | -0.0336982 | 0.0961559  |
| Least  | Audience outdegree | -28        | -0.0070629 | 0.0189236 | -0.0535130 | 0.0393872  |
| Least  | Audience outdegree | -27        | 0.0067926  | 0.0534759 | -0.1244702 | 0.1380553  |
| Least  | Audience outdegree | -26        | 0.0943564  | 0.0406911 | -0.0055245 | 0.1942374  |
| Least  | Audience outdegree | -25        | -0.0812926 | 0.0133883 | -0.1141558 | -0.0484294 |
| Least  | Audience outdegree | -24        | -0.0018218 | 0.0304395 | -0.0765390 | 0.0728955  |
| Least  | Audience outdegree | -23        | 0.0408943  | 0.0381343 | -0.0527108 | 0.1344994  |
| Least  | Audience outdegree | -22        | 0.0297020  | 0.0259433 | -0.0339787 | 0.0933827  |
| Least  | Audience outdegree | -21        | -0.0407506 | 0.0290903 | -0.1121561 | 0.0306549  |
| Least  | Audience outdegree | -20        | 0.0214937  | 0.0398628 | -0.0763541 | 0.1193416  |
| Least  | Audience outdegree | -19        | -0.0049434 | 0.0259598 | -0.0686649 | 0.0587780  |
| Least  | Audience outdegree | -18        | -0.0854563 | 0.0285674 | -0.1555783 | -0.0153343 |
| Least  | Audience outdegree | -17        | -0.0188613 | 0.0115622 | -0.0472421 | 0.0095195  |
| Least  | Audience outdegree | -16        | 0.0033128  | 0.0275234 | -0.0642465 | 0.0708721  |
| Least  | Audience outdegree | -15        | 0.0376301  | 0.0145779 | 0.0018470  | 0.0734133  |
| Least  | Audience outdegree | -14        | 0.0312757  | 0.0183200 | -0.0136929 | 0.0762443  |
| Least  | Audience outdegree | -13        | 0.0011723  | 0.0177032 | -0.0422821 | 0.0446268  |

|       |                    |     |            |           |            |            |
|-------|--------------------|-----|------------|-----------|------------|------------|
| Least | Audience outdegree | -12 | -0.0471102 | 0.0477733 | -0.1643754 | 0.0701549  |
| Least | Audience outdegree | -11 | 0.0317042  | 0.0204647 | -0.0185287 | 0.0819371  |
| Least | Audience outdegree | -10 | -0.0189848 | 0.0263854 | -0.0837509 | 0.0457812  |
| Least | Audience outdegree | -9  | -0.0135871 | 0.0251797 | -0.0753936 | 0.0482195  |
| Least | Audience outdegree | -8  | 0.0236206  | 0.0376372 | -0.0687641 | 0.1160054  |
| Least | Audience outdegree | -7  | -0.0315101 | 0.0208122 | -0.0825961 | 0.0195759  |
| Least | Audience outdegree | -6  | -0.0068466 | 0.0293254 | -0.0788292 | 0.0651360  |
| Least | Audience outdegree | -5  | -0.0245257 | 0.0172259 | -0.0668088 | 0.0177573  |
| Least | Audience outdegree | -4  | 0.0608182  | 0.0519233 | -0.0666334 | 0.1882699  |
| Least | Audience outdegree | -3  | -0.0581352 | 0.0247532 | -0.1188949 | 0.0026245  |
| Least | Audience outdegree | -2  | -0.0472552 | 0.0445847 | -0.1566935 | 0.0621832  |
| Least | Audience outdegree | -1  | 0.0009638  | 0.0271642 | -0.0657139 | 0.0676415  |
| Least | Audience outdegree | 0   | -0.0581891 | 0.0334165 | -0.1402137 | 0.0238355  |
| Least | Audience outdegree | 1   | -0.1153064 | 0.0546166 | -0.2493693 | 0.0187565  |
| Least | Audience outdegree | 2   | -0.1105226 | 0.0456901 | -0.2226743 | 0.0016291  |
| Least | Audience outdegree | 3   | -0.1011615 | 0.0385115 | -0.1956923 | -0.0066306 |
| Least | Audience outdegree | 4   | -0.1370070 | 0.0927677 | -0.3647160 | 0.0907019  |
| Least | Audience outdegree | 5   | -0.1540200 | 0.0801203 | -0.3506847 | 0.0426446  |
| Least | Audience outdegree | 6   | -0.1511239 | 0.0638770 | -0.3079174 | 0.0056696  |
| Least | Audience outdegree | 7   | -0.1525251 | 0.0586228 | -0.2964215 | -0.0086287 |
| Least | Audience outdegree | 8   | -0.1333319 | 0.0409790 | -0.2339195 | -0.0327443 |
| Least | Audience outdegree | 9   | -0.1248231 | 0.0485905 | -0.2440942 | -0.0055520 |
| Least | Audience outdegree | 10  | -0.2020073 | 0.0541210 | -0.3348535 | -0.0691610 |
| Least | Audience outdegree | 11  | -0.1785757 | 0.0507319 | -0.3031031 | -0.0540483 |
| Least | Audience outdegree | 12  | -0.1812980 | 0.0532704 | -0.3120565 | -0.0505396 |
| Least | Audience outdegree | 13  | -0.2287495 | 0.0347877 | -0.3141399 | -0.1433591 |
| Least | Audience outdegree | 14  | -0.2164904 | 0.0382632 | -0.3104117 | -0.1225690 |
| Least | Audience outdegree | 15  | -0.0668754 | 0.0892307 | -0.2859025 | 0.1521517  |
| Least | Audience outdegree | 16  | -0.0892397 | 0.1254982 | -0.3972896 | 0.2188102  |
| Least | Audience outdegree | 17  | -0.1274751 | 0.1639451 | -0.5298974 | 0.2749472  |
| Least | Audience outdegree | 18  | -0.0609519 | 0.1924239 | -0.5332786 | 0.4113748  |
| Least | Audience outdegree | 19  | -0.1762018 | 0.1469428 | -0.5368900 | 0.1844864  |
| Least | Audience outdegree | 20  | -0.2444299 | 0.0599668 | -0.3916252 | -0.0972345 |
| Least | Audience outdegree | 21  | -0.2889714 | 0.0614644 | -0.4398429 | -0.1380999 |
| Least | Audience outdegree | 22  | -0.2913568 | 0.0697864 | -0.4626555 | -0.1200580 |
| Least | Audience outdegree | 23  | -0.3049841 | 0.0927805 | -0.5327246 | -0.0772437 |
| Least | Audience outdegree | 24  | -0.2978936 | 0.0592007 | -0.4432084 | -0.1525787 |
| Least | Audience outdegree | 25  | -0.2797228 | 0.0778234 | -0.4707492 | -0.0886963 |
| Least | Audience outdegree | 26  | -0.2970896 | 0.0676851 | -0.4632304 | -0.1309488 |
| Least | Audience outdegree | 27  | -0.2847651 | 0.0594155 | -0.4306074 | -0.1389229 |
| Least | Audience outdegree | 28  | -0.2644482 | 0.0926264 | -0.4918105 | -0.0370858 |

|       |                    |    |            |           |            |            |
|-------|--------------------|----|------------|-----------|------------|------------|
| Least | Audience outdegree | 29 | -0.2016641 | 0.1951102 | -0.6805847 | 0.2772564  |
| Least | Audience outdegree | 30 | -0.2371571 | 0.2636609 | -0.8843433 | 0.4100291  |
| Least | Audience outdegree | 31 | -0.1465958 | 0.1774621 | -0.5821970 | 0.2890055  |
| Least | Audience outdegree | 32 | -0.1824300 | 0.1799058 | -0.6240296 | 0.2591696  |
| Least | Audience outdegree | 33 | -0.1837823 | 0.1773707 | -0.6191591 | 0.2515945  |
| Least | Audience outdegree | 34 | -0.1471350 | 0.1161214 | -0.4321683 | 0.1378982  |
| Least | Audience outdegree | 35 | -0.1577630 | 0.1136796 | -0.4368029 | 0.1212768  |
| Least | Audience outdegree | 36 | -0.1502912 | 0.0286783 | -0.2206855 | -0.0798968 |
| Least | Audience outdegree | 37 | -0.1688761 | 0.0798423 | -0.3648581 | 0.0271060  |
| Least | Audience outdegree | 38 | -0.1478537 | 0.0791560 | -0.3421512 | 0.0464438  |
| Least | Audience outdegree | 39 | -0.1563697 | 0.0989846 | -0.3993389 | 0.0865996  |
| Least | Audience outdegree | 40 | -0.1386901 | 0.0825939 | -0.3414263 | 0.0640461  |
| Least | Audience outdegree | 41 | -0.1688122 | 0.0985987 | -0.4108341 | 0.0732098  |
| Least | Audience outdegree | 42 | -0.1506774 | 0.1503448 | -0.5197160 | 0.2183612  |
| Least | Audience outdegree | 43 | -0.3297710 | 0.3499782 | -1.1888331 | 0.5292911  |
| Least | Audience outdegree | 44 | -0.3472198 | 0.8398868 | -2.4088192 | 1.7143796  |
| Least | Audience outdegree | 45 | -0.3740458 | 0.6326044 | -1.9268465 | 1.1787549  |
| Least | Audience outdegree | 47 | -0.1823160 | 0.0095320 | -0.2057133 | -0.1589187 |
| Least | Audience outdegree | 48 | -0.1677461 | 0.0114157 | -0.1957673 | -0.1397249 |
| Least | Audience outdegree | 49 | -0.1648192 | 0.0105173 | -0.1906351 | -0.1390033 |
| Least | Audience outdegree | 50 | -0.1834992 | 0.0085467 | -0.2044779 | -0.1625204 |
| Least | Audience outdegree | 51 | -0.1959364 | 0.1785930 | -0.6343137 | 0.2424409  |
| Least | Audience outdegree | 52 | -0.2012335 | 0.1221273 | -0.5010090 | 0.0985420  |
| Least | Audience outdegree | 53 | -0.2085484 | 0.1908828 | -0.6770923 | 0.2599954  |
| Least | Audience outdegree | 54 | -0.1894122 | 0.1729898 | -0.6140356 | 0.2352113  |
| Least | Audience outdegree | 55 | -0.2126344 | 0.1602698 | -0.6060352 | 0.1807664  |
| Least | Audience outdegree | 56 | -0.4218120 | 0.4021310 | -1.4088889 | 0.5652650  |
| Least | Audience outdegree | 57 | -0.3439494 | 0.7314483 | -2.1393739 | 1.4514752  |
| Least | Audience outdegree | 58 | -0.4569265 | 0.7636623 | -2.3314240 | 1.4175711  |
| Least | Audience outdegree | 59 | -0.3936762 | 0.8112010 | -2.3848628 | 1.5975105  |



## Audience indegree

Average effect by length of exposure (Callaway and Sant'Anna)

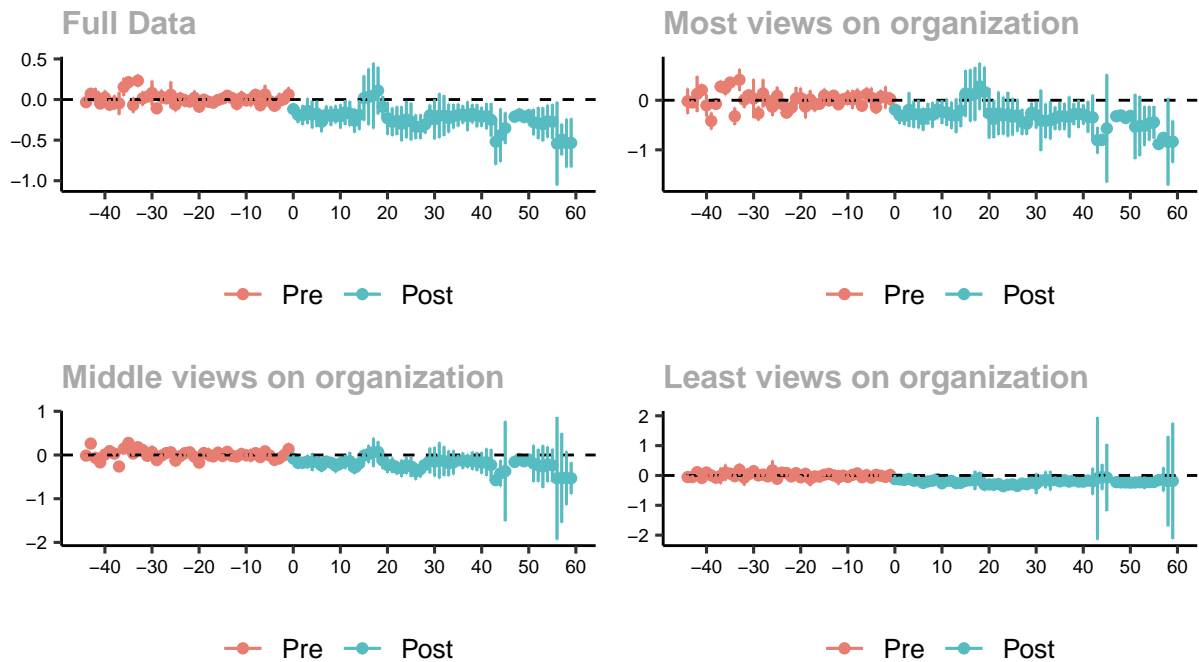

Long timeframe with sampled control groups

| sample | outcome           | event.time | estimate   | std.error | conf.low   | conf.high  |
|--------|-------------------|------------|------------|-----------|------------|------------|
| Full   | Audience indegree | -44        | -0.0324798 | 0.0215034 | -0.0881118 | 0.0231521  |
| Full   | Audience indegree | -43        | 0.0716486  | 0.0083079 | 0.0501552  | 0.0931421  |
| Full   | Audience indegree | -42        | 0.0423734  | 0.0378072 | -0.0554384 | 0.1401852  |
| Full   | Audience indegree | -41        | -0.0491086 | 0.0138367 | -0.0849058 | -0.0133114 |
| Full   | Audience indegree | -40        | 0.0236452  | 0.0334994 | -0.0630217 | 0.1103121  |
| Full   | Audience indegree | -39        | -0.0632950 | 0.0258717 | -0.1302281 | 0.0036381  |
| Full   | Audience indegree | -38        | -0.0353906 | 0.0335366 | -0.1221537 | 0.0513726  |
| Full   | Audience indegree | -37        | -0.0475422 | 0.0532245 | -0.1852405 | 0.0901560  |
| Full   | Audience indegree | -36        | 0.1544341  | 0.0428385 | 0.0436058  | 0.2652624  |
| Full   | Audience indegree | -35        | 0.2139094  | 0.0089992 | 0.1906274  | 0.2371913  |
| Full   | Audience indegree | -34        | -0.0681966 | 0.0359422 | -0.1611832 | 0.0247901  |
| Full   | Audience indegree | -33        | 0.2320958  | 0.0282076 | 0.1591194  | 0.3050723  |
| Full   | Audience indegree | -32        | 0.0124474  | 0.0333433 | -0.0738158 | 0.0987106  |
| Full   | Audience indegree | -31        | 0.0358306  | 0.0151278 | -0.0033068 | 0.0749681  |
| Full   | Audience indegree | -30        | 0.0812175  | 0.0582499 | -0.0694820 | 0.2319169  |
| Full   | Audience indegree | -29        | -0.1085703 | 0.0218910 | -0.1652049 | -0.0519356 |
| Full   | Audience indegree | -28        | 0.0351700  | 0.0328244 | -0.0497506 | 0.1200905  |
| Full   | Audience indegree | -27        | 0.0147432  | 0.0259449 | -0.0523793 | 0.0818657  |
| Full   | Audience indegree | -26        | 0.0589859  | 0.0624173 | -0.1024952 | 0.2204670  |

|      |                   |     |            |           |            |            |
|------|-------------------|-----|------------|-----------|------------|------------|
| Full | Audience indegree | -25 | -0.0624964 | 0.0314750 | -0.1439260 | 0.0189332  |
| Full | Audience indegree | -24 | 0.0122259  | 0.0284279 | -0.0613205 | 0.0857724  |
| Full | Audience indegree | -23 | -0.0112699 | 0.0299606 | -0.0887815 | 0.0662417  |
| Full | Audience indegree | -22 | -0.0246214 | 0.0251132 | -0.0895923 | 0.0403495  |
| Full | Audience indegree | -21 | 0.0206589  | 0.0340862 | -0.0675263 | 0.1088440  |
| Full | Audience indegree | -20 | -0.0887990 | 0.0219557 | -0.1456011 | -0.0319969 |
| Full | Audience indegree | -19 | -0.0015556 | 0.0223540 | -0.0593880 | 0.0562768  |
| Full | Audience indegree | -18 | -0.0273295 | 0.0220470 | -0.0843678 | 0.0297088  |
| Full | Audience indegree | -17 | -0.0384657 | 0.0232397 | -0.0985897 | 0.0216583  |
| Full | Audience indegree | -16 | -0.0056012 | 0.0140263 | -0.0418889 | 0.0306864  |
| Full | Audience indegree | -15 | 0.0125425  | 0.0190837 | -0.0368294 | 0.0619143  |
| Full | Audience indegree | -14 | 0.0469261  | 0.0076082 | 0.0272429  | 0.0666093  |
| Full | Audience indegree | -13 | 0.0186623  | 0.0173859 | -0.0263172 | 0.0636418  |
| Full | Audience indegree | -12 | -0.0538473 | 0.0294533 | -0.1300466 | 0.0223520  |
| Full | Audience indegree | -11 | 0.0206333  | 0.0313942 | -0.0605874 | 0.1018539  |
| Full | Audience indegree | -10 | -0.0114412 | 0.0203941 | -0.0642033 | 0.0413208  |
| Full | Audience indegree | -9  | 0.0040622  | 0.0343051 | -0.0846892 | 0.0928137  |
| Full | Audience indegree | -8  | 0.0581380  | 0.0267368 | -0.0110333 | 0.1273094  |
| Full | Audience indegree | -7  | -0.0702532 | 0.0243635 | -0.1332845 | -0.0072219 |
| Full | Audience indegree | -6  | 0.0626174  | 0.0445271 | -0.0525796 | 0.1778144  |
| Full | Audience indegree | -5  | -0.0197625 | 0.0323290 | -0.1034016 | 0.0638765  |
| Full | Audience indegree | -4  | -0.0766300 | 0.0207005 | -0.1301847 | -0.0230754 |
| Full | Audience indegree | -3  | -0.0171233 | 0.0371514 | -0.1132384 | 0.0789919  |
| Full | Audience indegree | -2  | 0.0054733  | 0.0274613 | -0.0655725 | 0.0765190  |
| Full | Audience indegree | -1  | 0.0607836  | 0.0341876 | -0.0276639 | 0.1492311  |
| Full | Audience indegree | 0   | -0.1182874 | 0.0256523 | -0.1846530 | -0.0519217 |
| Full | Audience indegree | 1   | -0.1892322 | 0.0376177 | -0.2865536 | -0.0919107 |
| Full | Audience indegree | 2   | -0.1920021 | 0.0474017 | -0.3146360 | -0.0693683 |
| Full | Audience indegree | 3   | -0.1400836 | 0.0613947 | -0.2989190 | 0.0187519  |
| Full | Audience indegree | 4   | -0.1844171 | 0.0655162 | -0.3539154 | -0.0149187 |
| Full | Audience indegree | 5   | -0.1739802 | 0.0626033 | -0.3359424 | -0.0120181 |
| Full | Audience indegree | 6   | -0.2742395 | 0.0489720 | -0.4009360 | -0.1475429 |
| Full | Audience indegree | 7   | -0.1886257 | 0.0438144 | -0.3019788 | -0.0752725 |
| Full | Audience indegree | 8   | -0.2032833 | 0.0455505 | -0.3211278 | -0.0854388 |
| Full | Audience indegree | 9   | -0.1817816 | 0.0423674 | -0.2913911 | -0.0721722 |
| Full | Audience indegree | 10  | -0.2064078 | 0.0573816 | -0.3548608 | -0.0579549 |
| Full | Audience indegree | 11  | -0.1589210 | 0.0590136 | -0.3115962 | -0.0062458 |
| Full | Audience indegree | 12  | -0.1729824 | 0.0595525 | -0.3270518 | -0.0189129 |
| Full | Audience indegree | 13  | -0.2601435 | 0.0565303 | -0.4063941 | -0.1138929 |
| Full | Audience indegree | 14  | -0.1883072 | 0.0705668 | -0.3708719 | -0.0057425 |
| Full | Audience indegree | 15  | 0.0179019  | 0.1070266 | -0.2589888 | 0.2947926  |

|      |                   |    |            |           |            |            |
|------|-------------------|----|------------|-----------|------------|------------|
| Full | Audience indegree | 16 | 0.0330656  | 0.1342778 | -0.3143272 | 0.3804584  |
| Full | Audience indegree | 17 | 0.0476413  | 0.1561006 | -0.3562096 | 0.4514922  |
| Full | Audience indegree | 18 | 0.1102219  | 0.1128205 | -0.1816583 | 0.4021022  |
| Full | Audience indegree | 19 | -0.0894817 | 0.0505789 | -0.2203354 | 0.0413720  |
| Full | Audience indegree | 20 | -0.2314152 | 0.0779545 | -0.4330930 | -0.0297375 |
| Full | Audience indegree | 21 | -0.2735102 | 0.0667174 | -0.4461161 | -0.1009042 |
| Full | Audience indegree | 22 | -0.2607702 | 0.0674719 | -0.4353282 | -0.0862122 |
| Full | Audience indegree | 23 | -0.2989746 | 0.0827244 | -0.5129925 | -0.0849568 |
| Full | Audience indegree | 24 | -0.2458176 | 0.0888095 | -0.4755786 | -0.0160567 |
| Full | Audience indegree | 25 | -0.2711985 | 0.0890794 | -0.5016576 | -0.0407394 |
| Full | Audience indegree | 26 | -0.3338755 | 0.0571546 | -0.4817412 | -0.1860097 |
| Full | Audience indegree | 27 | -0.3350226 | 0.0586283 | -0.4867010 | -0.1833442 |
| Full | Audience indegree | 28 | -0.3064144 | 0.0428241 | -0.4172055 | -0.1956234 |
| Full | Audience indegree | 29 | -0.1939035 | 0.0504972 | -0.3245457 | -0.0632612 |
| Full | Audience indegree | 30 | -0.2421885 | 0.0954035 | -0.4890089 | 0.0046318  |
| Full | Audience indegree | 31 | -0.1991530 | 0.1060532 | -0.4735254 | 0.0752193  |
| Full | Audience indegree | 32 | -0.1974534 | 0.0963923 | -0.4468318 | 0.0519250  |
| Full | Audience indegree | 33 | -0.2286334 | 0.0682662 | -0.4052461 | -0.0520206 |
| Full | Audience indegree | 34 | -0.2052840 | 0.0579007 | -0.3550801 | -0.0554878 |
| Full | Audience indegree | 35 | -0.1910387 | 0.0540134 | -0.3307779 | -0.0512994 |
| Full | Audience indegree | 36 | -0.1835103 | 0.0431763 | -0.2952126 | -0.0718081 |
| Full | Audience indegree | 37 | -0.2049696 | 0.0697511 | -0.3854241 | -0.0245151 |
| Full | Audience indegree | 38 | -0.1747507 | 0.0453029 | -0.2919548 | -0.0575466 |
| Full | Audience indegree | 39 | -0.1977040 | 0.0550571 | -0.3401434 | -0.0552646 |
| Full | Audience indegree | 40 | -0.2126378 | 0.0472333 | -0.3348361 | -0.0904395 |
| Full | Audience indegree | 41 | -0.2039438 | 0.0623255 | -0.3651874 | -0.0427002 |
| Full | Audience indegree | 42 | -0.2493852 | 0.0792905 | -0.4545193 | -0.0442510 |
| Full | Audience indegree | 43 | -0.5203119 | 0.1086746 | -0.8014661 | -0.2391576 |
| Full | Audience indegree | 44 | -0.4402443 | 0.1270344 | -0.7688976 | -0.1115910 |
| Full | Audience indegree | 45 | -0.3524826 | 0.0744019 | -0.5449692 | -0.1599959 |
| Full | Audience indegree | 47 | -0.2119884 | 0.0249156 | -0.2764480 | -0.1475289 |
| Full | Audience indegree | 48 | -0.1845352 | 0.0272640 | -0.2550704 | -0.1140000 |
| Full | Audience indegree | 49 | -0.2153355 | 0.0274911 | -0.2864582 | -0.1442128 |
| Full | Audience indegree | 50 | -0.1950385 | 0.0274911 | -0.2661612 | -0.1239158 |
| Full | Audience indegree | 51 | -0.2783624 | 0.0620997 | -0.4390218 | -0.1177030 |
| Full | Audience indegree | 52 | -0.2897206 | 0.0756634 | -0.4854708 | -0.0939703 |
| Full | Audience indegree | 53 | -0.3054690 | 0.0802454 | -0.5130735 | -0.0978645 |
| Full | Audience indegree | 54 | -0.2673402 | 0.0779302 | -0.4689550 | -0.0657255 |
| Full | Audience indegree | 55 | -0.2726692 | 0.0825718 | -0.4862923 | -0.0590460 |
| Full | Audience indegree | 56 | -0.5427271 | 0.1985334 | -1.0563569 | -0.0290973 |
| Full | Audience indegree | 57 | -0.4922552 | 0.0744917 | -0.6849741 | -0.2995363 |

|      |                   |    |            |           |            |            |
|------|-------------------|----|------------|-----------|------------|------------|
| Full | Audience indegree | 58 | -0.5365720 | 0.1154945 | -0.8353700 | -0.2377740 |
| Full | Audience indegree | 59 | -0.5341611 | 0.1162148 | -0.8348229 | -0.2334994 |

| sample | outcome           | event.time | estimate   | std.error | conf.low   | conf.high  |
|--------|-------------------|------------|------------|-----------|------------|------------|
| Most   | Audience indegree | -44        | -0.0198376 | 0.1004787 | -0.2743222 | 0.2346471  |
| Most   | Audience indegree | -43        | -0.0456996 | 0.0166221 | -0.0877988 | -0.0036004 |
| Most   | Audience indegree | -42        | 0.1283435  | 0.1427994 | -0.2333276 | 0.4900147  |
| Most   | Audience indegree | -41        | 0.2053995  | 0.0468688 | 0.0866938  | 0.3241052  |
| Most   | Audience indegree | -40        | -0.1042518 | 0.0863809 | -0.3230306 | 0.1145271  |
| Most   | Audience indegree | -39        | -0.4177036 | 0.0668629 | -0.5870489 | -0.2483584 |
| Most   | Audience indegree | -38        | -0.0738060 | 0.0304664 | -0.1509689 | 0.0033570  |
| Most   | Audience indegree | -37        | 0.2767905  | 0.0435109 | 0.1665895  | 0.3869914  |
| Most   | Audience indegree | -36        | 0.2445104  | 0.0556033 | 0.1036827  | 0.3853381  |
| Most   | Audience indegree | -35        | 0.3575681  | 0.0336119 | 0.2724384  | 0.4426978  |
| Most   | Audience indegree | -34        | -0.3236738 | 0.0688078 | -0.4979448 | -0.1494029 |
| Most   | Audience indegree | -33        | 0.4116313  | 0.0869547 | 0.1913992  | 0.6318633  |
| Most   | Audience indegree | -32        | 0.0103939  | 0.0635222 | -0.1504902 | 0.1712780  |
| Most   | Audience indegree | -31        | 0.1008803  | 0.0297152 | 0.0256199  | 0.1761408  |
| Most   | Audience indegree | -30        | 0.0333651  | 0.1544784 | -0.3578856 | 0.4246158  |
| Most   | Audience indegree | -29        | -0.2670053 | 0.0552659 | -0.4069784 | -0.1270322 |
| Most   | Audience indegree | -28        | 0.1388498  | 0.1110424 | -0.1423897 | 0.4200892  |
| Most   | Audience indegree | -27        | -0.0070565 | 0.0361480 | -0.0986092 | 0.0844963  |
| Most   | Audience indegree | -26        | -0.1327648 | 0.0712682 | -0.3132674 | 0.0477378  |
| Most   | Audience indegree | -25        | 0.0904170  | 0.0711823 | -0.0898679 | 0.2707019  |
| Most   | Audience indegree | -24        | -0.0720039 | 0.0144015 | -0.1084788 | -0.0355290 |
| Most   | Audience indegree | -23        | -0.2508696 | 0.0214702 | -0.3052476 | -0.1964917 |
| Most   | Audience indegree | -22        | -0.1521743 | 0.0549087 | -0.2912428 | -0.0131058 |
| Most   | Audience indegree | -21        | 0.0359176  | 0.0905699 | -0.1934708 | 0.2653060  |
| Most   | Audience indegree | -20        | 0.0431560  | 0.0823611 | -0.1654419 | 0.2517539  |
| Most   | Audience indegree | -19        | -0.1282408 | 0.0922308 | -0.3618358 | 0.1053543  |
| Most   | Audience indegree | -18        | 0.0152715  | 0.0726069 | -0.1686216 | 0.1991646  |
| Most   | Audience indegree | -17        | -0.0842053 | 0.0557244 | -0.2253397 | 0.0569290  |
| Most   | Audience indegree | -16        | -0.0723532 | 0.0335525 | -0.1573325 | 0.0126260  |
| Most   | Audience indegree | -15        | 0.0940594  | 0.0544963 | -0.0439645 | 0.2320833  |
| Most   | Audience indegree | -14        | -0.0052421 | 0.0223910 | -0.0619523 | 0.0514682  |
| Most   | Audience indegree | -13        | 0.0924518  | 0.0327219 | 0.0095763  | 0.1753272  |
| Most   | Audience indegree | -12        | -0.0820784 | 0.0325166 | -0.1644340 | 0.0002772  |
| Most   | Audience indegree | -11        | 0.0176407  | 0.0372762 | -0.0767695 | 0.1120508  |
| Most   | Audience indegree | -10        | 0.0503409  | 0.0581416 | -0.0969156 | 0.1975973  |
| Most   | Audience indegree | -9         | 0.0146537  | 0.0743888 | -0.1737523 | 0.2030598  |
| Most   | Audience indegree | -8         | 0.0842183  | 0.0581945 | -0.0631722 | 0.2316087  |

|      |                   |    |            |           |            |            |
|------|-------------------|----|------------|-----------|------------|------------|
| Most | Audience indegree | -7 | -0.1115425 | 0.0357893 | -0.2021867 | -0.0208982 |
| Most | Audience indegree | -6 | 0.1221484  | 0.0516993 | -0.0087916 | 0.2530885  |
| Most | Audience indegree | -5 | 0.0501263  | 0.0798252 | -0.1520487 | 0.2523012  |
| Most | Audience indegree | -4 | -0.1434927 | 0.0475276 | -0.2638667 | -0.0231186 |
| Most | Audience indegree | -3 | 0.0688481  | 0.0545683 | -0.0693581 | 0.2070544  |
| Most | Audience indegree | -2 | 0.0566043  | 0.0871833 | -0.1642068 | 0.2774153  |
| Most | Audience indegree | -1 | 0.0269392  | 0.0500571 | -0.0998416 | 0.1537199  |
| Most | Audience indegree | 0  | -0.1877036 | 0.0374876 | -0.2826493 | -0.0927579 |
| Most | Audience indegree | 1  | -0.3016741 | 0.0696332 | -0.4780357 | -0.1253125 |
| Most | Audience indegree | 2  | -0.3159395 | 0.0731009 | -0.5010839 | -0.1307951 |
| Most | Audience indegree | 3  | -0.1907735 | 0.1369582 | -0.5376505 | 0.1561036  |
| Most | Audience indegree | 4  | -0.2874998 | 0.1048448 | -0.5530424 | -0.0219572 |
| Most | Audience indegree | 5  | -0.2772932 | 0.1138631 | -0.5656767 | 0.0110902  |
| Most | Audience indegree | 6  | -0.3813091 | 0.0900593 | -0.6094043 | -0.1532139 |
| Most | Audience indegree | 7  | -0.2717154 | 0.0848152 | -0.4865287 | -0.0569020 |
| Most | Audience indegree | 8  | -0.2954697 | 0.1001905 | -0.5492244 | -0.0417151 |
| Most | Audience indegree | 9  | -0.1883225 | 0.0730054 | -0.3732249 | -0.0034200 |
| Most | Audience indegree | 10 | -0.2370824 | 0.0951379 | -0.4780402 | 0.0038755  |
| Most | Audience indegree | 11 | -0.2461933 | 0.1066500 | -0.5163082 | 0.0239216  |
| Most | Audience indegree | 12 | -0.3031728 | 0.1070588 | -0.5743230 | -0.0320226 |
| Most | Audience indegree | 13 | -0.3123875 | 0.1361823 | -0.6572994 | 0.0325243  |
| Most | Audience indegree | 14 | -0.2053290 | 0.1315060 | -0.5383972 | 0.1277391  |
| Most | Audience indegree | 15 | 0.1377660  | 0.1855665 | -0.3322222 | 0.6077543  |
| Most | Audience indegree | 16 | 0.0969084  | 0.2073177 | -0.4281696 | 0.6219864  |
| Most | Audience indegree | 17 | 0.1290130  | 0.2129044 | -0.4102146 | 0.6682406  |
| Most | Audience indegree | 18 | 0.2809332  | 0.1869372 | -0.1925267 | 0.7543930  |
| Most | Audience indegree | 19 | 0.1695829  | 0.1990697 | -0.3346053 | 0.6737712  |
| Most | Audience indegree | 20 | -0.2641083 | 0.1997788 | -0.7700924 | 0.2418758  |
| Most | Audience indegree | 21 | -0.3818657 | 0.1502526 | -0.7624138 | -0.0013177 |
| Most | Audience indegree | 22 | -0.2646548 | 0.1725295 | -0.7016241 | 0.1723144  |
| Most | Audience indegree | 23 | -0.3122681 | 0.1508142 | -0.6942386 | 0.0697024  |
| Most | Audience indegree | 24 | -0.2825256 | 0.1772082 | -0.7313447 | 0.1662935  |
| Most | Audience indegree | 25 | -0.3363985 | 0.1473146 | -0.7095054 | 0.0367084  |
| Most | Audience indegree | 26 | -0.3052742 | 0.1289617 | -0.6318984 | 0.0213501  |
| Most | Audience indegree | 27 | -0.4350646 | 0.1024408 | -0.6945186 | -0.1756107 |
| Most | Audience indegree | 28 | -0.4744898 | 0.0864875 | -0.6935386 | -0.2554411 |
| Most | Audience indegree | 29 | -0.2496320 | 0.0784091 | -0.4482204 | -0.0510436 |
| Most | Audience indegree | 30 | -0.2957804 | 0.1070184 | -0.5668281 | -0.0247327 |
| Most | Audience indegree | 31 | -0.4073751 | 0.2435026 | -1.0240994 | 0.2093493  |
| Most | Audience indegree | 32 | -0.4161748 | 0.1370443 | -0.7632699 | -0.0690797 |
| Most | Audience indegree | 33 | -0.4046309 | 0.1512936 | -0.7878157 | -0.0214462 |

|      |                   |    |            |           |            |            |
|------|-------------------|----|------------|-----------|------------|------------|
| Most | Audience indegree | 34 | -0.3629831 | 0.0919780 | -0.5959378 | -0.1300283 |
| Most | Audience indegree | 35 | -0.3215881 | 0.1107152 | -0.6019991 | -0.0411772 |
| Most | Audience indegree | 36 | -0.3257404 | 0.1060054 | -0.5942227 | -0.0572581 |
| Most | Audience indegree | 37 | -0.3379377 | 0.1626241 | -0.7498193 | 0.0739438  |
| Most | Audience indegree | 38 | -0.2811317 | 0.0856549 | -0.4980718 | -0.0641916 |
| Most | Audience indegree | 39 | -0.2734745 | 0.1122876 | -0.5578678 | 0.0109188  |
| Most | Audience indegree | 40 | -0.2869395 | 0.0795194 | -0.4883399 | -0.0855390 |
| Most | Audience indegree | 41 | -0.3350786 | 0.1238201 | -0.6486806 | -0.0214767 |
| Most | Audience indegree | 42 | -0.3483912 | 0.1812093 | -0.8073440 | 0.1105616  |
| Most | Audience indegree | 43 | -0.8082902 | 0.1047789 | -1.0736659 | -0.5429144 |
| Most | Audience indegree | 44 | -0.7996463 | 0.0410865 | -0.9037070 | -0.6955856 |
| Most | Audience indegree | 45 | -0.5673575 | 0.4301281 | -1.6567524 | 0.5220373  |
| Most | Audience indegree | 47 | -0.3218289 | 0.0063695 | -0.3379611 | -0.3056968 |
| Most | Audience indegree | 48 | -0.3053163 | 0.0091670 | -0.3285337 | -0.2820989 |
| Most | Audience indegree | 49 | -0.3575156 | 0.0070279 | -0.3753153 | -0.3397159 |
| Most | Audience indegree | 50 | -0.3138119 | 0.0070279 | -0.3316116 | -0.2960122 |
| Most | Audience indegree | 51 | -0.5323406 | 0.2585615 | -1.1872051 | 0.1225239  |
| Most | Audience indegree | 52 | -0.5184459 | 0.2387631 | -1.1231664 | 0.0862747  |
| Most | Audience indegree | 53 | -0.5170231 | 0.1580309 | -0.9172714 | -0.1167747 |
| Most | Audience indegree | 54 | -0.4661277 | 0.1366682 | -0.8122701 | -0.1199852 |
| Most | Audience indegree | 55 | -0.4440622 | 0.1293228 | -0.7716009 | -0.1165234 |
| Most | Audience indegree | 56 | -0.8846902 | 0.0039464 | -0.8946854 | -0.8746949 |
| Most | Audience indegree | 57 | -0.7577472 | 0.0103488 | -0.7839579 | -0.7315364 |
| Most | Audience indegree | 58 | -0.8406487 | 0.3457483 | -1.7163330 | 0.0350356  |
| Most | Audience indegree | 59 | -0.8350439 | 0.1673266 | -1.2588357 | -0.4112521 |

| sample | outcome           | event.time | estimate   | std.error | conf.low   | conf.high  |
|--------|-------------------|------------|------------|-----------|------------|------------|
| Middle | Audience indegree | -44        | -0.0137921 | 0.0200134 | -0.0652725 | 0.0376884  |
| Middle | Audience indegree | -43        | 0.2616608  | 0.0167800 | 0.2184976  | 0.3048239  |
| Middle | Audience indegree | -42        | -0.0646723 | 0.0241559 | -0.1268084 | -0.0025362 |
| Middle | Audience indegree | -41        | -0.1685011 | 0.0377457 | -0.2655942 | -0.0714080 |
| Middle | Audience indegree | -40        | 0.0092986  | 0.0462567 | -0.1096872 | 0.1282844  |
| Middle | Audience indegree | -39        | 0.0884314  | 0.0108335 | 0.0605644  | 0.1162984  |
| Middle | Audience indegree | -38        | 0.0317196  | 0.0431750 | -0.0793391 | 0.1427784  |
| Middle | Audience indegree | -37        | -0.2625574 | 0.0343010 | -0.3507897 | -0.1743252 |
| Middle | Audience indegree | -36        | 0.1449072  | 0.0369864 | 0.0497672  | 0.2400471  |
| Middle | Audience indegree | -35        | 0.2769097  | 0.0312422 | 0.1965457  | 0.3572738  |
| Middle | Audience indegree | -34        | 0.0338461  | 0.0239859 | -0.0278528 | 0.0955450  |
| Middle | Audience indegree | -33        | 0.1780249  | 0.0299110 | 0.1010848  | 0.2549649  |
| Middle | Audience indegree | -32        | 0.1141078  | 0.0371232 | 0.0186161  | 0.2095995  |
| Middle | Audience indegree | -31        | -0.0195163 | 0.0222874 | -0.0768461 | 0.0378135  |

|        |                   |     |            |           |            |            |
|--------|-------------------|-----|------------|-----------|------------|------------|
| Middle | Audience indegree | -30 | 0.0679256  | 0.0549683 | -0.0734690 | 0.2093203  |
| Middle | Audience indegree | -29 | -0.1166892 | 0.0313316 | -0.1972833 | -0.0360951 |
| Middle | Audience indegree | -28 | -0.0168516 | 0.0183787 | -0.0641271 | 0.0304238  |
| Middle | Audience indegree | -27 | 0.0427156  | 0.0364556 | -0.0510590 | 0.1364902  |
| Middle | Audience indegree | -26 | 0.0627644  | 0.0413129 | -0.0435046 | 0.1690335  |
| Middle | Audience indegree | -25 | -0.1280220 | 0.0467282 | -0.2482208 | -0.0078231 |
| Middle | Audience indegree | -24 | -0.0236156 | 0.0300446 | -0.1008992 | 0.0536681  |
| Middle | Audience indegree | -23 | 0.0428158  | 0.0402548 | -0.0607315 | 0.1463632  |
| Middle | Audience indegree | -22 | 0.0619900  | 0.0372386 | -0.0337986 | 0.1577786  |
| Middle | Audience indegree | -21 | -0.0414755 | 0.0580452 | -0.1907848 | 0.1078337  |
| Middle | Audience indegree | -20 | -0.1758662 | 0.0341015 | -0.2635852 | -0.0881471 |
| Middle | Audience indegree | -19 | 0.0455578  | 0.0430553 | -0.0651932 | 0.1563089  |
| Middle | Audience indegree | -18 | 0.0074536  | 0.0575715 | -0.1406373 | 0.1555444  |
| Middle | Audience indegree | -17 | -0.0331188 | 0.0241732 | -0.0952995 | 0.0290619  |
| Middle | Audience indegree | -16 | 0.0530325  | 0.0476040 | -0.0694189 | 0.1754840  |
| Middle | Audience indegree | -15 | -0.0238221 | 0.0191895 | -0.0731832 | 0.0255390  |
| Middle | Audience indegree | -14 | 0.0727884  | 0.0190988 | 0.0236606  | 0.1219161  |
| Middle | Audience indegree | -13 | -0.0208885 | 0.0186113 | -0.0687622 | 0.0269852  |
| Middle | Audience indegree | -12 | -0.0354039 | 0.0399185 | -0.1380860 | 0.0672782  |
| Middle | Audience indegree | -11 | 0.0230304  | 0.0476604 | -0.0995661 | 0.1456269  |
| Middle | Audience indegree | -10 | -0.0070393 | 0.0445915 | -0.1217417 | 0.1076631  |
| Middle | Audience indegree | -9  | -0.0109666 | 0.0570019 | -0.1575922 | 0.1356590  |
| Middle | Audience indegree | -8  | 0.0415063  | 0.0141900 | 0.0050053  | 0.0780072  |
| Middle | Audience indegree | -7  | -0.0486972 | 0.0336421 | -0.1352345 | 0.0378401  |
| Middle | Audience indegree | -6  | 0.0832942  | 0.0406249 | -0.0212050 | 0.1877935  |
| Middle | Audience indegree | -5  | -0.0122724 | 0.0306762 | -0.0911806 | 0.0666357  |
| Middle | Audience indegree | -4  | -0.1121159 | 0.0242694 | -0.1745440 | -0.0496877 |
| Middle | Audience indegree | -3  | -0.0773615 | 0.0455351 | -0.1944913 | 0.0397683  |
| Middle | Audience indegree | -2  | -0.0065090 | 0.0303633 | -0.0846123 | 0.0715944  |
| Middle | Audience indegree | -1  | 0.1343797  | 0.0515927 | 0.0016681  | 0.2670912  |
| Middle | Audience indegree | 0   | -0.0813348 | 0.0295385 | -0.1573165 | -0.0053531 |
| Middle | Audience indegree | 1   | -0.1784768 | 0.0487485 | -0.3038724 | -0.0530812 |
| Middle | Audience indegree | 2   | -0.1767095 | 0.0485834 | -0.3016803 | -0.0517386 |
| Middle | Audience indegree | 3   | -0.1512735 | 0.0595938 | -0.3045662 | 0.0020193  |
| Middle | Audience indegree | 4   | -0.1624586 | 0.0782655 | -0.3637806 | 0.0388635  |
| Middle | Audience indegree | 5   | -0.1610253 | 0.0531052 | -0.2976276 | -0.0244230 |
| Middle | Audience indegree | 6   | -0.2392369 | 0.0571174 | -0.3861597 | -0.0923141 |
| Middle | Audience indegree | 7   | -0.1522110 | 0.0458017 | -0.2700266 | -0.0343955 |
| Middle | Audience indegree | 8   | -0.1771964 | 0.0402374 | -0.2806989 | -0.0736940 |
| Middle | Audience indegree | 9   | -0.2472760 | 0.0587052 | -0.3982831 | -0.0962688 |
| Middle | Audience indegree | 10  | -0.1895101 | 0.0586715 | -0.3404305 | -0.0385897 |

|        |                   |    |            |           |            |            |
|--------|-------------------|----|------------|-----------|------------|------------|
| Middle | Audience indegree | 11 | -0.1531721 | 0.0618687 | -0.3123167 | 0.0059725  |
| Middle | Audience indegree | 12 | -0.1435969 | 0.0815862 | -0.3534607 | 0.0662668  |
| Middle | Audience indegree | 13 | -0.2858463 | 0.0542700 | -0.4254447 | -0.1462480 |
| Middle | Audience indegree | 14 | -0.1964702 | 0.0657648 | -0.3656366 | -0.0273038 |
| Middle | Audience indegree | 15 | -0.0139935 | 0.0509378 | -0.1450205 | 0.1170335  |
| Middle | Audience indegree | 16 | 0.0211997  | 0.0787629 | -0.1814017 | 0.2238012  |
| Middle | Audience indegree | 17 | 0.0597755  | 0.1290221 | -0.2721074 | 0.3916585  |
| Middle | Audience indegree | 18 | 0.0694080  | 0.0943788 | -0.1733622 | 0.3121783  |
| Middle | Audience indegree | 19 | -0.1249871 | 0.0740819 | -0.3155476 | 0.0655735  |
| Middle | Audience indegree | 20 | -0.2293516 | 0.0700925 | -0.4096503 | -0.0490529 |
| Middle | Audience indegree | 21 | -0.2319483 | 0.0671675 | -0.4047228 | -0.0591738 |
| Middle | Audience indegree | 22 | -0.2916457 | 0.0593254 | -0.4442482 | -0.1390432 |
| Middle | Audience indegree | 23 | -0.3052626 | 0.0765182 | -0.5020901 | -0.1084351 |
| Middle | Audience indegree | 24 | -0.2372036 | 0.0761975 | -0.4332061 | -0.0412012 |
| Middle | Audience indegree | 25 | -0.2653302 | 0.0914878 | -0.5006639 | -0.0299965 |
| Middle | Audience indegree | 26 | -0.3736499 | 0.0748310 | -0.5661373 | -0.1811625 |
| Middle | Audience indegree | 27 | -0.3281261 | 0.0708206 | -0.5102976 | -0.1459546 |
| Middle | Audience indegree | 28 | -0.2215962 | 0.0528557 | -0.3575567 | -0.0856358 |
| Middle | Audience indegree | 29 | -0.1260031 | 0.1130094 | -0.4166966 | 0.1646903  |
| Middle | Audience indegree | 30 | -0.1525305 | 0.1309744 | -0.4894353 | 0.1843744  |
| Middle | Audience indegree | 31 | -0.1228262 | 0.1599137 | -0.5341713 | 0.2885189  |
| Middle | Audience indegree | 32 | -0.1384800 | 0.1316443 | -0.4771080 | 0.2001480  |
| Middle | Audience indegree | 33 | -0.1904205 | 0.1127723 | -0.4805041 | 0.0996631  |
| Middle | Audience indegree | 34 | -0.1690961 | 0.1067541 | -0.4436990 | 0.1055068  |
| Middle | Audience indegree | 35 | -0.1183062 | 0.0493327 | -0.2452046 | 0.0085921  |
| Middle | Audience indegree | 36 | -0.1302850 | 0.0718279 | -0.3150474 | 0.0544774  |
| Middle | Audience indegree | 37 | -0.1376502 | 0.0612804 | -0.2952814 | 0.0199810  |
| Middle | Audience indegree | 38 | -0.1313197 | 0.0798479 | -0.3367120 | 0.0740727  |
| Middle | Audience indegree | 39 | -0.1536176 | 0.0828744 | -0.3667952 | 0.0595599  |
| Middle | Audience indegree | 40 | -0.1786995 | 0.0956543 | -0.4247506 | 0.0673516  |
| Middle | Audience indegree | 41 | -0.1652421 | 0.1220768 | -0.4792596 | 0.1487753  |
| Middle | Audience indegree | 42 | -0.2279461 | 0.1405297 | -0.5894299 | 0.1335377  |
| Middle | Audience indegree | 43 | -0.5762376 | 0.0383686 | -0.6749329 | -0.4775424 |
| Middle | Audience indegree | 44 | -0.4189301 | 0.1156460 | -0.7164056 | -0.1214546 |
| Middle | Audience indegree | 45 | -0.3702970 | 0.4442141 | -1.5129468 | 0.7723527  |
| Middle | Audience indegree | 47 | -0.1588399 | 0.0110982 | -0.1873877 | -0.1302920 |
| Middle | Audience indegree | 48 | -0.0926854 | 0.0159726 | -0.1337715 | -0.0515992 |
| Middle | Audience indegree | 49 | -0.1440778 | 0.0122454 | -0.1755767 | -0.1125789 |
| Middle | Audience indegree | 50 | -0.1054195 | 0.0122454 | -0.1369183 | -0.0739206 |
| Middle | Audience indegree | 51 | -0.1948375 | 0.1648693 | -0.6189300 | 0.2292550  |
| Middle | Audience indegree | 52 | -0.2355740 | 0.1457308 | -0.6104366 | 0.1392886  |



|        |                   |    |            |           |            |            |
|--------|-------------------|----|------------|-----------|------------|------------|
| Middle | Audience indegree | 53 | -0.2650259 | 0.1891541 | -0.7515860 | 0.2215341  |
| Middle | Audience indegree | 54 | -0.2137892 | 0.1574449 | -0.6187839 | 0.1912055  |
| Middle | Audience indegree | 55 | -0.2389807 | 0.1475173 | -0.6184386 | 0.1404772  |
| Middle | Audience indegree | 56 | -0.5330280 | 0.5444852 | -1.9336046 | 0.8675485  |
| Middle | Audience indegree | 57 | -0.5241172 | 0.3977320 | -1.5472011 | 0.4989668  |
| Middle | Audience indegree | 58 | -0.5280776 | 0.2374402 | -1.1388438 | 0.0826887  |
| Middle | Audience indegree | 59 | -0.5319197 | 0.1409872 | -0.8945804 | -0.1692589 |

| sample | outcome           | event.time | estimate   | std.error | conf.low   | conf.high  |
|--------|-------------------|------------|------------|-----------|------------|------------|
| Least  | Audience indegree | -44        | -0.0538819 | 0.0361801 | -0.1448014 | 0.0370376  |
| Least  | Audience indegree | -43        | -0.0536025 | 0.0194688 | -0.1025271 | -0.0046779 |
| Least  | Audience indegree | -42        | 0.1104604  | 0.0430875 | 0.0021828  | 0.2187380  |
| Least  | Audience indegree | -41        | -0.0842886 | 0.0265482 | -0.1510034 | -0.0175739 |
| Least  | Audience indegree | -40        | 0.0997200  | 0.0307669 | 0.0224038  | 0.1770363  |
| Least  | Audience indegree | -39        | 0.0014288  | 0.0336958 | -0.0832477 | 0.0861053  |
| Least  | Audience indegree | -38        | -0.0745267 | 0.0595876 | -0.2242686 | 0.0752151  |
| Least  | Audience indegree | -37        | -0.0127030 | 0.1073542 | -0.2824807 | 0.2570747  |
| Least  | Audience indegree | -36        | 0.0978594  | 0.1047778 | -0.1654439 | 0.3611627  |
| Least  | Audience indegree | -35        | 0.0623048  | 0.0355348 | -0.0269930 | 0.1516027  |
| Least  | Audience indegree | -34        | -0.0252129 | 0.0271274 | -0.0933833 | 0.0429575  |
| Least  | Audience indegree | -33        | 0.1916907  | 0.0787808 | -0.0062830 | 0.3896644  |
| Least  | Audience indegree | -32        | -0.0731526 | 0.1028812 | -0.3316899 | 0.1853846  |
| Least  | Audience indegree | -31        | 0.0483825  | 0.0108634 | 0.0210832  | 0.0756819  |
| Least  | Audience indegree | -30        | 0.1452770  | 0.0256158 | 0.0809052  | 0.2096487  |
| Least  | Audience indegree | -29        | 0.0001041  | 0.0133262 | -0.0333843 | 0.0335926  |
| Least  | Audience indegree | -28        | 0.0300547  | 0.0577504 | -0.1150703 | 0.1751797  |
| Least  | Audience indegree | -27        | -0.0316822 | 0.0480107 | -0.1523315 | 0.0889672  |
| Least  | Audience indegree | -26        | 0.1722973  | 0.1294709 | -0.1530589 | 0.4976536  |
| Least  | Audience indegree | -25        | -0.1107461 | 0.0275781 | -0.1800491 | -0.0414431 |
| Least  | Audience indegree | -24        | 0.0956404  | 0.0490100 | -0.0275201 | 0.2188008  |
| Least  | Audience indegree | -23        | 0.0813908  | 0.0516799 | -0.0484792 | 0.2112607  |
| Least  | Audience indegree | -22        | -0.0338464 | 0.0436068 | -0.1434290 | 0.0757361  |
| Least  | Audience indegree | -21        | 0.0775133  | 0.0246359 | 0.0156040  | 0.1394226  |
| Least  | Audience indegree | -20        | -0.0615718 | 0.0149310 | -0.0990930 | -0.0240505 |
| Least  | Audience indegree | -19        | 0.0569429  | 0.0438769 | -0.0533184 | 0.1672043  |
| Least  | Audience indegree | -18        | -0.1126744 | 0.0936511 | -0.3480167 | 0.1226680  |
| Least  | Audience indegree | -17        | -0.0306899 | 0.0166075 | -0.0724241 | 0.0110443  |
| Least  | Audience indegree | -16        | -0.0370988 | 0.0269203 | -0.1047487 | 0.0305511  |
| Least  | Audience indegree | -15        | 0.0252466  | 0.0228182 | -0.0320949 | 0.0825881  |
| Least  | Audience indegree | -14        | 0.0540535  | 0.0388578 | -0.0435949 | 0.1517019  |
| Least  | Audience indegree | -13        | 0.0017395  | 0.0418073 | -0.1033208 | 0.1067998  |

|       |                   |     |            |           |            |            |
|-------|-------------------|-----|------------|-----------|------------|------------|
| Least | Audience indegree | -12 | -0.0646472 | 0.0941288 | -0.3011899 | 0.1718954  |
| Least | Audience indegree | -11 | -0.0055716 | 0.0265727 | -0.0723481 | 0.0612048  |
| Least | Audience indegree | -10 | -0.0493074 | 0.0419006 | -0.1546024 | 0.0559876  |
| Least | Audience indegree | -9  | 0.0189739  | 0.0514608 | -0.1103454 | 0.1482931  |
| Least | Audience indegree | -8  | 0.0697442  | 0.0387164 | -0.0275488 | 0.1670373  |
| Least | Audience indegree | -7  | -0.0597026 | 0.0450174 | -0.1728299 | 0.0534248  |
| Least | Audience indegree | -6  | 0.0103905  | 0.0698172 | -0.1650579 | 0.1858389  |
| Least | Audience indegree | -5  | -0.0735722 | 0.0530057 | -0.2067739 | 0.0596295  |
| Least | Audience indegree | -4  | 0.0207163  | 0.0551383 | -0.1178445 | 0.1592771  |
| Least | Audience indegree | -3  | -0.0089046 | 0.0194801 | -0.0578575 | 0.0400482  |
| Least | Audience indegree | -2  | -0.0480618 | 0.0554925 | -0.1875128 | 0.0913891  |
| Least | Audience indegree | -1  | 0.0138831  | 0.0787818 | -0.1840930 | 0.2118592  |
| Least | Audience indegree | 0   | -0.1211202 | 0.0533521 | -0.2551922 | 0.0129518  |
| Least | Audience indegree | 1   | -0.1301494 | 0.0377624 | -0.2250452 | -0.0352537 |
| Least | Audience indegree | 2   | -0.1496915 | 0.0537295 | -0.2847122 | -0.0146708 |
| Least | Audience indegree | 3   | -0.1185585 | 0.0514215 | -0.2477791 | 0.0106621  |
| Least | Audience indegree | 4   | -0.1763072 | 0.0535315 | -0.3108302 | -0.0417842 |
| Least | Audience indegree | 5   | -0.1618967 | 0.0650709 | -0.3254178 | 0.0016244  |
| Least | Audience indegree | 6   | -0.2508443 | 0.0550428 | -0.3891651 | -0.1125236 |
| Least | Audience indegree | 7   | -0.1998665 | 0.0472771 | -0.3186725 | -0.0810605 |
| Least | Audience indegree | 8   | -0.1762472 | 0.0600521 | -0.3271563 | -0.0253381 |
| Least | Audience indegree | 9   | -0.1195909 | 0.0540243 | -0.2553522 | 0.0161703  |
| Least | Audience indegree | 10  | -0.2624256 | 0.0521864 | -0.3935685 | -0.1312827 |
| Least | Audience indegree | 11  | -0.1770897 | 0.0552494 | -0.3159296 | -0.0382497 |
| Least | Audience indegree | 12  | -0.1796285 | 0.0563677 | -0.3212788 | -0.0379782 |
| Least | Audience indegree | 13  | -0.2555506 | 0.0534222 | -0.3897990 | -0.1213022 |
| Least | Audience indegree | 14  | -0.2474955 | 0.0236226 | -0.3068584 | -0.1881327 |
| Least | Audience indegree | 15  | -0.1801952 | 0.0244848 | -0.2417247 | -0.1186656 |
| Least | Audience indegree | 16  | -0.1620775 | 0.0268975 | -0.2296701 | -0.0944848 |
| Least | Audience indegree | 17  | -0.1646539 | 0.1262793 | -0.4819898 | 0.1526820  |
| Least | Audience indegree | 18  | -0.0864700 | 0.0792173 | -0.2855405 | 0.1126005  |
| Least | Audience indegree | 19  | -0.3062846 | 0.0788024 | -0.5043125 | -0.1082567 |
| Least | Audience indegree | 20  | -0.3005557 | 0.0587267 | -0.4481341 | -0.1529772 |
| Least | Audience indegree | 21  | -0.3071955 | 0.0754126 | -0.4967051 | -0.1176859 |
| Least | Audience indegree | 22  | -0.2852202 | 0.0489051 | -0.4081170 | -0.1623233 |
| Least | Audience indegree | 23  | -0.3602539 | 0.0487757 | -0.4828257 | -0.2376821 |
| Least | Audience indegree | 24  | -0.3119484 | 0.0475711 | -0.4314932 | -0.1924036 |
| Least | Audience indegree | 25  | -0.2961627 | 0.0418955 | -0.4014447 | -0.1908808 |
| Least | Audience indegree | 26  | -0.3507560 | 0.0487531 | -0.4732711 | -0.2282409 |
| Least | Audience indegree | 27  | -0.2711379 | 0.0583366 | -0.4177360 | -0.1245397 |
| Least | Audience indegree | 28  | -0.2937120 | 0.0338316 | -0.3787298 | -0.2086941 |

|       |                   |    |            |           |            |            |
|-------|-------------------|----|------------|-----------|------------|------------|
| Least | Audience indegree | 29 | -0.2294315 | 0.0768520 | -0.4225581 | -0.0363048 |
| Least | Audience indegree | 30 | -0.2764769 | 0.1370915 | -0.6209836 | 0.0680297  |
| Least | Audience indegree | 31 | -0.1742658 | 0.0668056 | -0.3421463 | -0.0063853 |
| Least | Audience indegree | 32 | -0.1464848 | 0.1112577 | -0.4260719 | 0.1331022  |
| Least | Audience indegree | 33 | -0.1768001 | 0.1281443 | -0.4988227 | 0.1452224  |
| Least | Audience indegree | 34 | -0.1502225 | 0.0475063 | -0.2696043 | -0.0308406 |
| Least | Audience indegree | 35 | -0.1991995 | 0.0318117 | -0.2791413 | -0.1192577 |
| Least | Audience indegree | 36 | -0.1597159 | 0.0653340 | -0.3238983 | 0.0044664  |
| Least | Audience indegree | 37 | -0.2047877 | 0.0629555 | -0.3629928 | -0.0465826 |
| Least | Audience indegree | 38 | -0.1615034 | 0.0566507 | -0.3038649 | -0.0191419 |
| Least | Audience indegree | 39 | -0.2047935 | 0.0322788 | -0.2859092 | -0.1236778 |
| Least | Audience indegree | 40 | -0.2079133 | 0.0347681 | -0.2952844 | -0.1205423 |
| Least | Audience indegree | 41 | -0.1689747 | 0.0488224 | -0.2916637 | -0.0462856 |
| Least | Audience indegree | 42 | -0.1935054 | 0.1772545 | -0.6389403 | 0.2519295  |
| Least | Audience indegree | 43 | -0.0946565 | 0.8165338 | -2.1465803 | 1.9572674  |
| Least | Audience indegree | 44 | -0.0495098 | 0.1697027 | -0.4759674 | 0.3769478  |
| Least | Audience indegree | 45 | -0.0717557 | 0.4463618 | -1.1934489 | 1.0499374  |
| Least | Audience indegree | 47 | -0.2240345 | 0.0095320 | -0.2479881 | -0.2000810 |
| Least | Audience indegree | 48 | -0.2343712 | 0.0104304 | -0.2605825 | -0.2081600 |
| Least | Audience indegree | 49 | -0.2336237 | 0.0117744 | -0.2632125 | -0.2040349 |
| Least | Audience indegree | 50 | -0.2432750 | 0.0105173 | -0.2697046 | -0.2168454 |
| Least | Audience indegree | 51 | -0.2367950 | 0.0244844 | -0.2983234 | -0.1752665 |
| Least | Audience indegree | 52 | -0.2276106 | 0.0414849 | -0.3318607 | -0.1233604 |
| Least | Audience indegree | 53 | -0.2367357 | 0.0807537 | -0.4396672 | -0.0338042 |
| Least | Audience indegree | 54 | -0.2209612 | 0.0635223 | -0.3805908 | -0.0613315 |
| Least | Audience indegree | 55 | -0.2180650 | 0.0180423 | -0.2634048 | -0.1727251 |
| Least | Audience indegree | 56 | -0.1546364 | 0.0093286 | -0.1780789 | -0.1311939 |
| Least | Audience indegree | 57 | -0.1302089 | 0.1589629 | -0.5296777 | 0.2692599  |
| Least | Audience indegree | 58 | -0.1912776 | 0.6001791 | -1.6995090 | 1.3169538  |
| Least | Audience indegree | 59 | -0.1829891 | 0.7735142 | -2.1268061 | 1.7608278  |

## Audience outdegree/total outdegree

Average effect by length of exposure (Callaway and Sant'Anna)

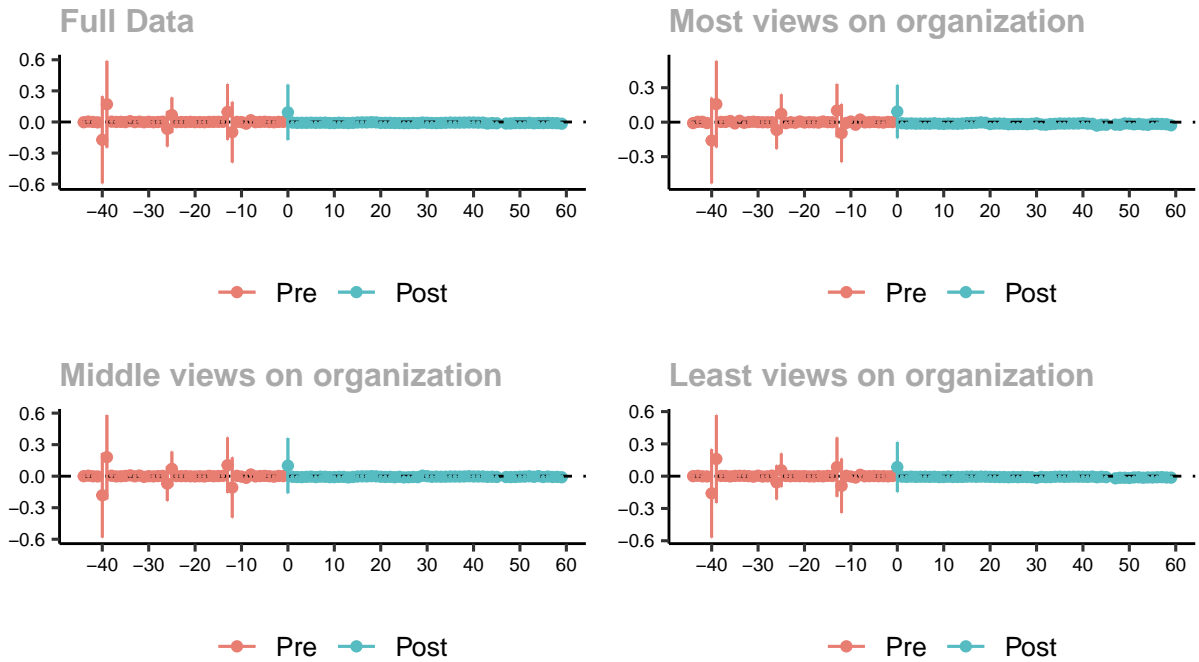

Long timeframe with sampled control groups

| sample | outcome                            | event.time | estimate   | std.error | conf.low   | conf.high  |
|--------|------------------------------------|------------|------------|-----------|------------|------------|
| Full   | Audience outdegree/total outdegree | -44        | -0.0021582 | 0.0006738 | -0.0039503 | -0.0003660 |
| Full   | Audience outdegree/total outdegree | -43        | 0.0038909  | 0.0015415 | -0.0002093 | 0.0079910  |
| Full   | Audience outdegree/total outdegree | -42        | -0.0000145 | 0.0011658 | -0.0031155 | 0.0030864  |
| Full   | Audience outdegree/total outdegree | -41        | -0.0035383 | 0.0020305 | -0.0089390 | 0.0018625  |
| Full   | Audience outdegree/total outdegree | -40        | -0.1719313 | 0.1577679 | -0.5915672 | 0.2477046  |
| Full   | Audience outdegree/total outdegree | -39        | 0.1710736  | 0.1572409 | -0.2471607 | 0.5893080  |
| Full   | Audience outdegree/total outdegree | -38        | 0.0030601  | 0.0013468 | -0.0005221 | 0.0066422  |
| Full   | Audience outdegree/total outdegree | -37        | 0.0004131  | 0.0020369 | -0.0050047 | 0.0058310  |
| Full   | Audience outdegree/total outdegree | -36        | 0.0014396  | 0.0011779 | -0.0016934 | 0.0045726  |
| Full   | Audience outdegree/total outdegree | -35        | -0.0012854 | 0.0016640 | -0.0057113 | 0.0031404  |
| Full   | Audience outdegree/total outdegree | -34        | 0.0077786  | 0.0017608 | 0.0030951  | 0.0124621  |
| Full   | Audience outdegree/total outdegree | -33        | -0.0011370 | 0.0009832 | -0.0037521 | 0.0014781  |
| Full   | Audience outdegree/total outdegree | -32        | 0.0029735  | 0.0007250 | 0.0010451  | 0.0049019  |
| Full   | Audience outdegree/total outdegree | -31        | -0.0027763 | 0.0005850 | -0.0043321 | -0.0012204 |
| Full   | Audience outdegree/total outdegree | -30        | 0.0019194  | 0.0006139 | 0.0002865  | 0.0035523  |
| Full   | Audience outdegree/total outdegree | -29        | -0.0021376 | 0.0005266 | -0.0035383 | -0.0007370 |
| Full   | Audience outdegree/total outdegree | -28        | -0.0002060 | 0.0007363 | -0.0021645 | 0.0017525  |
| Full   | Audience outdegree/total outdegree | -27        | 0.0025938  | 0.0012847 | -0.0008234 | 0.0060109  |
| Full   | Audience outdegree/total outdegree | -26        | -0.0667651 | 0.0637433 | -0.2363116 | 0.1027814  |

|      |                                    |     |            |           |            |            |
|------|------------------------------------|-----|------------|-----------|------------|------------|
| Full | Audience outdegree/total outdegree | -25 | 0.0664847  | 0.0637531 | -0.1030879 | 0.2360573  |
| Full | Audience outdegree/total outdegree | -24 | -0.0015942 | 0.0008249 | -0.0037882 | 0.0005998  |
| Full | Audience outdegree/total outdegree | -23 | -0.0001931 | 0.0015216 | -0.0042403 | 0.0038542  |
| Full | Audience outdegree/total outdegree | -22 | -0.0006777 | 0.0015281 | -0.0047422 | 0.0033867  |
| Full | Audience outdegree/total outdegree | -21 | 0.0011904  | 0.0013347 | -0.0023595 | 0.0047404  |
| Full | Audience outdegree/total outdegree | -20 | -0.0014435 | 0.0012917 | -0.0048791 | 0.0019921  |
| Full | Audience outdegree/total outdegree | -19 | -0.0008852 | 0.0012902 | -0.0043169 | 0.0025465  |
| Full | Audience outdegree/total outdegree | -18 | -0.0019262 | 0.0004193 | -0.0030415 | -0.0008110 |
| Full | Audience outdegree/total outdegree | -17 | 0.0006737  | 0.0006914 | -0.0011653 | 0.0025127  |
| Full | Audience outdegree/total outdegree | -16 | 0.0008204  | 0.0007609 | -0.0012035 | 0.0028442  |
| Full | Audience outdegree/total outdegree | -15 | 0.0014616  | 0.0003058 | 0.0006482  | 0.0022750  |
| Full | Audience outdegree/total outdegree | -14 | 0.0016880  | 0.0013562 | -0.0019193 | 0.0052954  |
| Full | Audience outdegree/total outdegree | -13 | 0.0970803  | 0.1010369 | -0.1716608 | 0.3658214  |
| Full | Audience outdegree/total outdegree | -12 | -0.0982477 | 0.1099677 | -0.3907433 | 0.1942480  |
| Full | Audience outdegree/total outdegree | -11 | 0.0006214  | 0.0006163 | -0.0010178 | 0.0022607  |
| Full | Audience outdegree/total outdegree | -10 | -0.0011914 | 0.0007127 | -0.0030871 | 0.0007044  |
| Full | Audience outdegree/total outdegree | -9  | -0.0163181 | 0.0144346 | -0.0547118 | 0.0220757  |
| Full | Audience outdegree/total outdegree | -8  | 0.0170341  | 0.0147748 | -0.0222643 | 0.0563325  |
| Full | Audience outdegree/total outdegree | -7  | -0.0017148 | 0.0004412 | -0.0028884 | -0.0005412 |
| Full | Audience outdegree/total outdegree | -6  | 0.0003699  | 0.0008727 | -0.0019513 | 0.0026911  |
| Full | Audience outdegree/total outdegree | -5  | 0.0020807  | 0.0005329 | 0.0006632  | 0.0034981  |
| Full | Audience outdegree/total outdegree | -4  | -0.0005443 | 0.0007227 | -0.0024666 | 0.0013780  |
| Full | Audience outdegree/total outdegree | -3  | -0.0025242 | 0.0007769 | -0.0045905 | -0.0004578 |
| Full | Audience outdegree/total outdegree | -2  | 0.0008604  | 0.0005070 | -0.0004882 | 0.0022090  |
| Full | Audience outdegree/total outdegree | -1  | 0.0010530  | 0.0006317 | -0.0006272 | 0.0027332  |
| Full | Audience outdegree/total outdegree | 0   | 0.0929773  | 0.1003595 | -0.1739620 | 0.3599166  |
| Full | Audience outdegree/total outdegree | 1   | -0.0062166 | 0.0010138 | -0.0089131 | -0.0035201 |
| Full | Audience outdegree/total outdegree | 2   | -0.0086581 | 0.0011766 | -0.0117876 | -0.0055286 |
| Full | Audience outdegree/total outdegree | 3   | -0.0078807 | 0.0012424 | -0.0111852 | -0.0045761 |
| Full | Audience outdegree/total outdegree | 4   | -0.0082523 | 0.0011989 | -0.0114411 | -0.0050636 |
| Full | Audience outdegree/total outdegree | 5   | -0.0068606 | 0.0018887 | -0.0118843 | -0.0018368 |
| Full | Audience outdegree/total outdegree | 6   | -0.0085327 | 0.0015459 | -0.0126444 | -0.0044209 |
| Full | Audience outdegree/total outdegree | 7   | -0.0075743 | 0.0015624 | -0.0117301 | -0.0034186 |
| Full | Audience outdegree/total outdegree | 8   | -0.0066536 | 0.0014418 | -0.0104886 | -0.0028186 |
| Full | Audience outdegree/total outdegree | 9   | -0.0100514 | 0.0013498 | -0.0136415 | -0.0064612 |
| Full | Audience outdegree/total outdegree | 10  | -0.0103154 | 0.0019808 | -0.0155839 | -0.0050469 |
| Full | Audience outdegree/total outdegree | 11  | -0.0072294 | 0.0015894 | -0.0114570 | -0.0030018 |
| Full | Audience outdegree/total outdegree | 12  | -0.0088099 | 0.0018179 | -0.0136452 | -0.0039746 |
| Full | Audience outdegree/total outdegree | 13  | -0.0108362 | 0.0013823 | -0.0145129 | -0.0071595 |
| Full | Audience outdegree/total outdegree | 14  | -0.0084894 | 0.0017429 | -0.0131251 | -0.0038536 |
| Full | Audience outdegree/total outdegree | 15  | -0.0051920 | 0.0012219 | -0.0084422 | -0.0019419 |

|      |                                    |    |            |           |            |            |
|------|------------------------------------|----|------------|-----------|------------|------------|
| Full | Audience outdegree/total outdegree | 16 | -0.0038010 | 0.0010764 | -0.0066639 | -0.0009381 |
| Full | Audience outdegree/total outdegree | 17 | -0.0044567 | 0.0017698 | -0.0091642 | 0.0002507  |
| Full | Audience outdegree/total outdegree | 18 | -0.0018899 | 0.0018181 | -0.0067256 | 0.0029459  |
| Full | Audience outdegree/total outdegree | 19 | -0.0035883 | 0.0015896 | -0.0078164 | 0.0006399  |
| Full | Audience outdegree/total outdegree | 20 | -0.0088558 | 0.0014376 | -0.0126796 | -0.0050320 |
| Full | Audience outdegree/total outdegree | 21 | -0.0086476 | 0.0015952 | -0.0128906 | -0.0044046 |
| Full | Audience outdegree/total outdegree | 22 | -0.0084862 | 0.0019242 | -0.0136042 | -0.0033683 |
| Full | Audience outdegree/total outdegree | 23 | -0.0102554 | 0.0015631 | -0.0144129 | -0.0060979 |
| Full | Audience outdegree/total outdegree | 24 | -0.0104765 | 0.0015252 | -0.0145332 | -0.0064198 |
| Full | Audience outdegree/total outdegree | 25 | -0.0115819 | 0.0015371 | -0.0156703 | -0.0074935 |
| Full | Audience outdegree/total outdegree | 26 | -0.0111782 | 0.0011268 | -0.0141752 | -0.0081812 |
| Full | Audience outdegree/total outdegree | 27 | -0.0096393 | 0.0013481 | -0.0132251 | -0.0060535 |
| Full | Audience outdegree/total outdegree | 28 | -0.0111426 | 0.0017030 | -0.0156723 | -0.0066129 |
| Full | Audience outdegree/total outdegree | 29 | -0.0056124 | 0.0042693 | -0.0169681 | 0.0057433  |
| Full | Audience outdegree/total outdegree | 30 | -0.0078383 | 0.0012276 | -0.0111035 | -0.0045730 |
| Full | Audience outdegree/total outdegree | 31 | -0.0100850 | 0.0036006 | -0.0196621 | -0.0005079 |
| Full | Audience outdegree/total outdegree | 32 | -0.0108919 | 0.0028002 | -0.0183400 | -0.0034439 |
| Full | Audience outdegree/total outdegree | 33 | -0.0095709 | 0.0011807 | -0.0127112 | -0.0064305 |
| Full | Audience outdegree/total outdegree | 34 | -0.0077134 | 0.0012701 | -0.0110915 | -0.0043352 |
| Full | Audience outdegree/total outdegree | 35 | -0.0059315 | 0.0017273 | -0.0105258 | -0.0013372 |
| Full | Audience outdegree/total outdegree | 36 | -0.0070000 | 0.0020249 | -0.0123858 | -0.0016142 |
| Full | Audience outdegree/total outdegree | 37 | -0.0062902 | 0.0021488 | -0.0120055 | -0.0005748 |
| Full | Audience outdegree/total outdegree | 38 | -0.0058091 | 0.0021596 | -0.0115534 | -0.0000649 |
| Full | Audience outdegree/total outdegree | 39 | -0.0049661 | 0.0017154 | -0.0095288 | -0.0004034 |
| Full | Audience outdegree/total outdegree | 40 | -0.0050225 | 0.0020641 | -0.0105126 | 0.0004677  |
| Full | Audience outdegree/total outdegree | 41 | -0.0069630 | 0.0027250 | -0.0142111 | 0.0002852  |
| Full | Audience outdegree/total outdegree | 42 | -0.0060874 | 0.0020241 | -0.0114712 | -0.0007036 |
| Full | Audience outdegree/total outdegree | 43 | -0.0148907 | 0.0016361 | -0.0192425 | -0.0105390 |
| Full | Audience outdegree/total outdegree | 44 | -0.0104537 | 0.0010553 | -0.0132605 | -0.0076469 |
| Full | Audience outdegree/total outdegree | 45 | -0.0125015 | 0.0013469 | -0.0160840 | -0.0089190 |
| Full | Audience outdegree/total outdegree | 47 | -0.0150011 | NA        | NA         | NA         |
| Full | Audience outdegree/total outdegree | 48 | -0.0141784 | NA        | NA         | NA         |
| Full | Audience outdegree/total outdegree | 49 | -0.0105545 | NA        | NA         | NA         |
| Full | Audience outdegree/total outdegree | 50 | -0.0105175 | NA        | NA         | NA         |
| Full | Audience outdegree/total outdegree | 51 | -0.0105107 | 0.0010288 | -0.0132470 | -0.0077743 |
| Full | Audience outdegree/total outdegree | 52 | -0.0078507 | 0.0012904 | -0.0112831 | -0.0044184 |
| Full | Audience outdegree/total outdegree | 53 | -0.0126344 | 0.0003513 | -0.0135688 | -0.0117000 |
| Full | Audience outdegree/total outdegree | 54 | -0.0099338 | 0.0016829 | -0.0144100 | -0.0054575 |
| Full | Audience outdegree/total outdegree | 55 | -0.0109817 | 0.0007635 | -0.0130125 | -0.0089509 |
| Full | Audience outdegree/total outdegree | 56 | -0.0088739 | 0.0042389 | -0.0201488 | 0.0024009  |
| Full | Audience outdegree/total outdegree | 57 | -0.0107010 | 0.0099587 | -0.0371895 | 0.0157875  |

|      |                                    |    |            |           |            |            |
|------|------------------------------------|----|------------|-----------|------------|------------|
| Full | Audience outdegree/total outdegree | 58 | -0.0118786 | 0.0027189 | -0.0191103 | -0.0046469 |
| Full | Audience outdegree/total outdegree | 59 | -0.0166248 | 0.0018630 | -0.0215800 | -0.0116696 |

| sample | outcome                            | event.time | estimate   | std.error | conf.low   | conf.high  |
|--------|------------------------------------|------------|------------|-----------|------------|------------|
| Most   | Audience outdegree/total outdegree | -44        | -0.0079560 | 0.0023925 | -0.0140389 | -0.0018732 |
| Most   | Audience outdegree/total outdegree | -43        | 0.0029655  | 0.0027794 | -0.0041010 | 0.0100321  |
| Most   | Audience outdegree/total outdegree | -42        | 0.0031202  | 0.0015185 | -0.0007404 | 0.0069808  |
| Most   | Audience outdegree/total outdegree | -41        | -0.0078134 | 0.0030848 | -0.0156563 | 0.0000296  |
| Most   | Audience outdegree/total outdegree | -40        | -0.1594866 | 0.1465021 | -0.5319578 | 0.2129845  |
| Most   | Audience outdegree/total outdegree | -39        | 0.1571000  | 0.1480225 | -0.2192366 | 0.5334366  |
| Most   | Audience outdegree/total outdegree | -38        | 0.0021921  | 0.0030322 | -0.0055169 | 0.0099012  |
| Most   | Audience outdegree/total outdegree | -37        | 0.0020474  | 0.0046582 | -0.0097958 | 0.0138907  |
| Most   | Audience outdegree/total outdegree | -36        | 0.0098833  | 0.0023758 | 0.0038429  | 0.0159237  |
| Most   | Audience outdegree/total outdegree | -35        | -0.0108139 | 0.0034756 | -0.0196504 | -0.0019775 |
| Most   | Audience outdegree/total outdegree | -34        | 0.0123474  | 0.0035769 | 0.0032533  | 0.0214414  |
| Most   | Audience outdegree/total outdegree | -33        | -0.0052023 | 0.0031709 | -0.0132641 | 0.0028594  |
| Most   | Audience outdegree/total outdegree | -32        | 0.0011866  | 0.0027371 | -0.0057721 | 0.0081454  |
| Most   | Audience outdegree/total outdegree | -31        | 0.0042334  | 0.0022798 | -0.0015629 | 0.0100297  |
| Most   | Audience outdegree/total outdegree | -30        | 0.0009783  | 0.0023708 | -0.0050492 | 0.0070058  |
| Most   | Audience outdegree/total outdegree | -29        | -0.0007380 | 0.0020034 | -0.0058315 | 0.0043555  |
| Most   | Audience outdegree/total outdegree | -28        | -0.0006910 | 0.0011296 | -0.0035628 | 0.0021808  |
| Most   | Audience outdegree/total outdegree | -27        | -0.0000322 | 0.0028072 | -0.0071693 | 0.0071049  |
| Most   | Audience outdegree/total outdegree | -26        | -0.0683904 | 0.0650422 | -0.2337555 | 0.0969748  |
| Most   | Audience outdegree/total outdegree | -25        | 0.0728294  | 0.0663504 | -0.0958617 | 0.2415206  |
| Most   | Audience outdegree/total outdegree | -24        | -0.0086616 | 0.0036053 | -0.0178277 | 0.0005046  |
| Most   | Audience outdegree/total outdegree | -23        | -0.0004952 | 0.0037168 | -0.0099450 | 0.0089545  |
| Most   | Audience outdegree/total outdegree | -22        | -0.0048047 | 0.0022725 | -0.0105823 | 0.0009728  |
| Most   | Audience outdegree/total outdegree | -21        | 0.0061000  | 0.0022613 | 0.0003509  | 0.0118491  |
| Most   | Audience outdegree/total outdegree | -20        | -0.0025966 | 0.0029401 | -0.0100715 | 0.0048783  |
| Most   | Audience outdegree/total outdegree | -19        | -0.0000889 | 0.0028885 | -0.0074326 | 0.0072549  |
| Most   | Audience outdegree/total outdegree | -18        | -0.0014710 | 0.0029281 | -0.0089154 | 0.0059734  |
| Most   | Audience outdegree/total outdegree | -17        | -0.0035256 | 0.0016311 | -0.0076726 | 0.0006213  |
| Most   | Audience outdegree/total outdegree | -16        | 0.0055145  | 0.0022245 | -0.0001413 | 0.0111702  |
| Most   | Audience outdegree/total outdegree | -15        | 0.0001160  | 0.0016435 | -0.0040625 | 0.0042946  |
| Most   | Audience outdegree/total outdegree | -14        | -0.0002251 | 0.0009665 | -0.0026823 | 0.0022322  |
| Most   | Audience outdegree/total outdegree | -13        | 0.1011798  | 0.0910178 | -0.1302262 | 0.3325859  |
| Most   | Audience outdegree/total outdegree | -12        | -0.0946808 | 0.0996012 | -0.3479097 | 0.1585482  |
| Most   | Audience outdegree/total outdegree | -11        | -0.0066897 | 0.0017912 | -0.0112438 | -0.0021357 |
| Most   | Audience outdegree/total outdegree | -10        | 0.0054633  | 0.0029319 | -0.0019909 | 0.0129176  |
| Most   | Audience outdegree/total outdegree | -9         | -0.0219663 | 0.0154898 | -0.0613479 | 0.0174154  |
| Most   | Audience outdegree/total outdegree | -8         | 0.0226101  | 0.0157268 | -0.0173742 | 0.0625945  |

|      |                                    |    |            |           |            |            |
|------|------------------------------------|----|------------|-----------|------------|------------|
| Most | Audience outdegree/total outdegree | -7 | -0.0016224 | 0.0020069 | -0.0067247 | 0.0034799  |
| Most | Audience outdegree/total outdegree | -6 | -0.0001542 | 0.0029444 | -0.0076401 | 0.0073318  |
| Most | Audience outdegree/total outdegree | -5 | 0.0020084  | 0.0019903 | -0.0030517 | 0.0070686  |
| Most | Audience outdegree/total outdegree | -4 | -0.0009618 | 0.0017571 | -0.0054291 | 0.0035054  |
| Most | Audience outdegree/total outdegree | -3 | -0.0033347 | 0.0015684 | -0.0073222 | 0.0006528  |
| Most | Audience outdegree/total outdegree | -2 | 0.0019731  | 0.0018101 | -0.0026289 | 0.0065752  |
| Most | Audience outdegree/total outdegree | -1 | 0.0005722  | 0.0014686 | -0.0031616 | 0.0043060  |
| Most | Audience outdegree/total outdegree | 0  | 0.0927293  | 0.0912012 | -0.1391433 | 0.3246019  |
| Most | Audience outdegree/total outdegree | 1  | -0.0089370 | 0.0017884 | -0.0134838 | -0.0043901 |
| Most | Audience outdegree/total outdegree | 2  | -0.0120144 | 0.0015726 | -0.0160126 | -0.0080163 |
| Most | Audience outdegree/total outdegree | 3  | -0.0106466 | 0.0025300 | -0.0170789 | -0.0042142 |
| Most | Audience outdegree/total outdegree | 4  | -0.0130902 | 0.0018979 | -0.0179155 | -0.0082648 |
| Most | Audience outdegree/total outdegree | 5  | -0.0123491 | 0.0030614 | -0.0201326 | -0.0045657 |
| Most | Audience outdegree/total outdegree | 6  | -0.0124393 | 0.0030358 | -0.0201576 | -0.0047211 |
| Most | Audience outdegree/total outdegree | 7  | -0.0130588 | 0.0022589 | -0.0188019 | -0.0073156 |
| Most | Audience outdegree/total outdegree | 8  | -0.0096416 | 0.0027125 | -0.0165381 | -0.0027451 |
| Most | Audience outdegree/total outdegree | 9  | -0.0137421 | 0.0026907 | -0.0205831 | -0.0069011 |
| Most | Audience outdegree/total outdegree | 10 | -0.0148030 | 0.0037568 | -0.0243545 | -0.0052516 |
| Most | Audience outdegree/total outdegree | 11 | -0.0113638 | 0.0026038 | -0.0179839 | -0.0047438 |
| Most | Audience outdegree/total outdegree | 12 | -0.0133309 | 0.0026441 | -0.0200533 | -0.0066086 |
| Most | Audience outdegree/total outdegree | 13 | -0.0139815 | 0.0023693 | -0.0200052 | -0.0079578 |
| Most | Audience outdegree/total outdegree | 14 | -0.0117602 | 0.0030271 | -0.0194565 | -0.0040639 |
| Most | Audience outdegree/total outdegree | 15 | -0.0083556 | 0.0027265 | -0.0152877 | -0.0014236 |
| Most | Audience outdegree/total outdegree | 16 | -0.0066411 | 0.0040572 | -0.0169562 | 0.0036740  |
| Most | Audience outdegree/total outdegree | 17 | -0.0052628 | 0.0043854 | -0.0164123 | 0.0058868  |
| Most | Audience outdegree/total outdegree | 18 | -0.0017212 | 0.0045077 | -0.0131817 | 0.0097393  |
| Most | Audience outdegree/total outdegree | 19 | -0.0048371 | 0.0026601 | -0.0116001 | 0.0019260  |
| Most | Audience outdegree/total outdegree | 20 | -0.0162757 | 0.0031868 | -0.0243778 | -0.0081736 |
| Most | Audience outdegree/total outdegree | 21 | -0.0118611 | 0.0033040 | -0.0202613 | -0.0034609 |
| Most | Audience outdegree/total outdegree | 22 | -0.0118274 | 0.0036987 | -0.0212312 | -0.0024237 |
| Most | Audience outdegree/total outdegree | 23 | -0.0131196 | 0.0033957 | -0.0217530 | -0.0044862 |
| Most | Audience outdegree/total outdegree | 24 | -0.0179197 | 0.0036818 | -0.0272804 | -0.0085590 |
| Most | Audience outdegree/total outdegree | 25 | -0.0165129 | 0.0031939 | -0.0246332 | -0.0083926 |
| Most | Audience outdegree/total outdegree | 26 | -0.0155044 | 0.0025098 | -0.0218855 | -0.0091233 |
| Most | Audience outdegree/total outdegree | 27 | -0.0153963 | 0.0027490 | -0.0223854 | -0.0084071 |
| Most | Audience outdegree/total outdegree | 28 | -0.0176334 | 0.0030223 | -0.0253172 | -0.0099495 |
| Most | Audience outdegree/total outdegree | 29 | -0.0141790 | 0.0074540 | -0.0331302 | 0.0047722  |
| Most | Audience outdegree/total outdegree | 30 | -0.0101040 | 0.0028086 | -0.0172448 | -0.0029632 |
| Most | Audience outdegree/total outdegree | 31 | -0.0197829 | 0.0061935 | -0.0355295 | -0.0040363 |
| Most | Audience outdegree/total outdegree | 32 | -0.0221731 | 0.0055310 | -0.0362354 | -0.0081109 |
| Most | Audience outdegree/total outdegree | 33 | -0.0163100 | 0.0047182 | -0.0283057 | -0.0043143 |



|      |                                    |    |            |           |            |            |
|------|------------------------------------|----|------------|-----------|------------|------------|
| Most | Audience outdegree/total outdegree | 34 | -0.0147550 | 0.0027311 | -0.0216987 | -0.0078113 |
| Most | Audience outdegree/total outdegree | 35 | -0.0114889 | 0.0027146 | -0.0183906 | -0.0045872 |
| Most | Audience outdegree/total outdegree | 36 | -0.0128285 | 0.0045418 | -0.0243756 | -0.0012814 |
| Most | Audience outdegree/total outdegree | 37 | -0.0112911 | 0.0030873 | -0.0191404 | -0.0034418 |
| Most | Audience outdegree/total outdegree | 38 | -0.0117867 | 0.0032618 | -0.0200796 | -0.0034938 |
| Most | Audience outdegree/total outdegree | 39 | -0.0112311 | 0.0015397 | -0.0151457 | -0.0073165 |
| Most | Audience outdegree/total outdegree | 40 | -0.0079925 | 0.0053953 | -0.0217096 | 0.0057246  |
| Most | Audience outdegree/total outdegree | 41 | -0.0129179 | 0.0047160 | -0.0249080 | -0.0009278 |
| Most | Audience outdegree/total outdegree | 42 | -0.0138404 | 0.0029229 | -0.0212716 | -0.0064092 |
| Most | Audience outdegree/total outdegree | 43 | -0.0296513 | 0.0068322 | -0.0470217 | -0.0122808 |
| Most | Audience outdegree/total outdegree | 44 | -0.0215829 | 0.0108471 | -0.0491610 | 0.0059952  |
| Most | Audience outdegree/total outdegree | 45 | -0.0223841 | 0.0110466 | -0.0504694 | 0.0057011  |
| Most | Audience outdegree/total outdegree | 47 | -0.0210915 | NA        | NA         | NA         |
| Most | Audience outdegree/total outdegree | 48 | -0.0225375 | NA        | NA         | NA         |
| Most | Audience outdegree/total outdegree | 49 | -0.0109978 | NA        | NA         | NA         |
| Most | Audience outdegree/total outdegree | 50 | -0.0129072 | NA        | NA         | NA         |
| Most | Audience outdegree/total outdegree | 51 | -0.0186995 | 0.0053186 | -0.0322217 | -0.0051774 |
| Most | Audience outdegree/total outdegree | 52 | -0.0149145 | 0.0054777 | -0.0288411 | -0.0009878 |
| Most | Audience outdegree/total outdegree | 53 | -0.0200603 | 0.0020068 | -0.0251625 | -0.0149581 |
| Most | Audience outdegree/total outdegree | 54 | -0.0228197 | 0.0167988 | -0.0655294 | 0.0198901  |
| Most | Audience outdegree/total outdegree | 55 | -0.0139799 | 0.0009237 | -0.0163283 | -0.0116314 |
| Most | Audience outdegree/total outdegree | 56 | -0.0145928 | 0.0082113 | -0.0354694 | 0.0062839  |
| Most | Audience outdegree/total outdegree | 57 | -0.0159452 | 0.0038769 | -0.0258019 | -0.0060884 |
| Most | Audience outdegree/total outdegree | 58 | -0.0182136 | 0.0067069 | -0.0352655 | -0.0011618 |
| Most | Audience outdegree/total outdegree | 59 | -0.0271664 | 0.0025259 | -0.0335883 | -0.0207445 |

| sample | outcome                            | event.time | estimate   | std.error | conf.low   | conf.high  |
|--------|------------------------------------|------------|------------|-----------|------------|------------|
| Middle | Audience outdegree/total outdegree | -44        | 0.0000018  | 0.0007232 | -0.0018682 | 0.0018718  |
| Middle | Audience outdegree/total outdegree | -43        | 0.0045827  | 0.0014560 | 0.0008179  | 0.0083474  |
| Middle | Audience outdegree/total outdegree | -42        | -0.0006818 | 0.0016474 | -0.0049415 | 0.0035778  |
| Middle | Audience outdegree/total outdegree | -41        | -0.0021446 | 0.0022777 | -0.0080341 | 0.0037449  |
| Middle | Audience outdegree/total outdegree | -40        | -0.1816234 | 0.1553913 | -0.5834236 | 0.2201768  |
| Middle | Audience outdegree/total outdegree | -39        | 0.1808141  | 0.1549246 | -0.2197792 | 0.5814074  |
| Middle | Audience outdegree/total outdegree | -38        | 0.0043100  | 0.0019042 | -0.0006138 | 0.0092339  |
| Middle | Audience outdegree/total outdegree | -37        | -0.0021594 | 0.0020306 | -0.0074101 | 0.0030913  |
| Middle | Audience outdegree/total outdegree | -36        | -0.0010899 | 0.0020688 | -0.0064393 | 0.0042594  |
| Middle | Audience outdegree/total outdegree | -35        | 0.0024115  | 0.0017269 | -0.0020539 | 0.0068769  |
| Middle | Audience outdegree/total outdegree | -34        | 0.0081172  | 0.0024572 | 0.0017634  | 0.0144709  |
| Middle | Audience outdegree/total outdegree | -33        | -0.0012426 | 0.0013997 | -0.0048617 | 0.0023765  |
| Middle | Audience outdegree/total outdegree | -32        | 0.0061893  | 0.0017752 | 0.0015992  | 0.0107793  |
| Middle | Audience outdegree/total outdegree | -31        | -0.0062955 | 0.0012436 | -0.0095110 | -0.0030799 |

|        |                                    |     |            |           |            |            |
|--------|------------------------------------|-----|------------|-----------|------------|------------|
| Middle | Audience outdegree/total outdegree | -30 | 0.0004071  | 0.0006475 | -0.0012672 | 0.0020815  |
| Middle | Audience outdegree/total outdegree | -29 | -0.0020617 | 0.0008223 | -0.0041880 | 0.0000646  |
| Middle | Audience outdegree/total outdegree | -28 | 0.0007847  | 0.0016057 | -0.0033671 | 0.0049366  |
| Middle | Audience outdegree/total outdegree | -27 | 0.0025590  | 0.0011665 | -0.0004572 | 0.0055753  |
| Middle | Audience outdegree/total outdegree | -26 | -0.0704222 | 0.0639500 | -0.2357797 | 0.0949353  |
| Middle | Audience outdegree/total outdegree | -25 | 0.0689195  | 0.0637941 | -0.0960348 | 0.2338739  |
| Middle | Audience outdegree/total outdegree | -24 | 0.0006248  | 0.0010850 | -0.0021807 | 0.0034303  |
| Middle | Audience outdegree/total outdegree | -23 | 0.0000171  | 0.0011312 | -0.0029079 | 0.0029422  |
| Middle | Audience outdegree/total outdegree | -22 | 0.0006422  | 0.0015601 | -0.0033917 | 0.0046761  |
| Middle | Audience outdegree/total outdegree | -21 | -0.0012596 | 0.0012463 | -0.0044823 | 0.0019631  |
| Middle | Audience outdegree/total outdegree | -20 | -0.0023541 | 0.0015193 | -0.0062825 | 0.0015744  |
| Middle | Audience outdegree/total outdegree | -19 | -0.0002158 | 0.0015110 | -0.0041228 | 0.0036912  |
| Middle | Audience outdegree/total outdegree | -18 | -0.0027292 | 0.0010599 | -0.0054700 | 0.0000115  |
| Middle | Audience outdegree/total outdegree | -17 | 0.0034364  | 0.0017140 | -0.0009956 | 0.0078684  |
| Middle | Audience outdegree/total outdegree | -16 | -0.0004744 | 0.0005882 | -0.0019953 | 0.0010464  |
| Middle | Audience outdegree/total outdegree | -15 | 0.0009826  | 0.0005268 | -0.0003797 | 0.0023448  |
| Middle | Audience outdegree/total outdegree | -14 | 0.0030472  | 0.0015172 | -0.0008758 | 0.0069702  |
| Middle | Audience outdegree/total outdegree | -13 | 0.1048906  | 0.1017738 | -0.1582690 | 0.3680502  |
| Middle | Audience outdegree/total outdegree | -12 | -0.1079510 | 0.1106393 | -0.3940344 | 0.1781325  |
| Middle | Audience outdegree/total outdegree | -11 | 0.0030540  | 0.0014077 | -0.0005861 | 0.0066940  |
| Middle | Audience outdegree/total outdegree | -10 | -0.0036757 | 0.0016621 | -0.0079735 | 0.0006221  |
| Middle | Audience outdegree/total outdegree | -9  | -0.0154697 | 0.0163844 | -0.0578353 | 0.0268960  |
| Middle | Audience outdegree/total outdegree | -8  | 0.0163885  | 0.0148767 | -0.0220786 | 0.0548556  |
| Middle | Audience outdegree/total outdegree | -7  | -0.0022419 | 0.0012938 | -0.0055875 | 0.0011036  |
| Middle | Audience outdegree/total outdegree | -6  | 0.0010343  | 0.0010686 | -0.0017287 | 0.0037973  |
| Middle | Audience outdegree/total outdegree | -5  | 0.0027586  | 0.0006609 | 0.0010497  | 0.0044674  |
| Middle | Audience outdegree/total outdegree | -4  | -0.0002703 | 0.0009448 | -0.0027132 | 0.0021727  |
| Middle | Audience outdegree/total outdegree | -3  | -0.0042181 | 0.0011976 | -0.0073148 | -0.0011213 |
| Middle | Audience outdegree/total outdegree | -2  | 0.0022501  | 0.0009437 | -0.0001901 | 0.0046904  |
| Middle | Audience outdegree/total outdegree | -1  | 0.0007977  | 0.0012985 | -0.0025598 | 0.0041552  |
| Middle | Audience outdegree/total outdegree | 0   | 0.1002758  | 0.1014602 | -0.1620731 | 0.3626247  |
| Middle | Audience outdegree/total outdegree | 1   | -0.0057254 | 0.0016221 | -0.0099198 | -0.0015310 |
| Middle | Audience outdegree/total outdegree | 2   | -0.0082110 | 0.0018107 | -0.0128931 | -0.0035289 |
| Middle | Audience outdegree/total outdegree | 3   | -0.0092113 | 0.0020054 | -0.0143968 | -0.0040258 |
| Middle | Audience outdegree/total outdegree | 4   | -0.0064438 | 0.0016243 | -0.0106438 | -0.0022437 |
| Middle | Audience outdegree/total outdegree | 5   | -0.0042711 | 0.0018824 | -0.0091386 | 0.0005963  |
| Middle | Audience outdegree/total outdegree | 6   | -0.0085663 | 0.0020102 | -0.0137641 | -0.0033686 |
| Middle | Audience outdegree/total outdegree | 7   | -0.0046346 | 0.0021903 | -0.0102980 | 0.0010288  |
| Middle | Audience outdegree/total outdegree | 8   | -0.0056236 | 0.0022718 | -0.0114978 | 0.0002507  |
| Middle | Audience outdegree/total outdegree | 9   | -0.0088037 | 0.0016816 | -0.0131518 | -0.0044556 |
| Middle | Audience outdegree/total outdegree | 10  | -0.0088958 | 0.0023655 | -0.0150123 | -0.0027792 |

|        |                                    |    |            |           |            |            |
|--------|------------------------------------|----|------------|-----------|------------|------------|
| Middle | Audience outdegree/total outdegree | 11 | -0.0063859 | 0.0022579 | -0.0122241 | -0.0005476 |
| Middle | Audience outdegree/total outdegree | 12 | -0.0067869 | 0.0019955 | -0.0119468 | -0.0016270 |
| Middle | Audience outdegree/total outdegree | 13 | -0.0116477 | 0.0021083 | -0.0170991 | -0.0061963 |
| Middle | Audience outdegree/total outdegree | 14 | -0.0074758 | 0.0020451 | -0.0127639 | -0.0021878 |
| Middle | Audience outdegree/total outdegree | 15 | -0.0030544 | 0.0010204 | -0.0056929 | -0.0004159 |
| Middle | Audience outdegree/total outdegree | 16 | -0.0015156 | 0.0017797 | -0.0061174 | 0.0030863  |
| Middle | Audience outdegree/total outdegree | 17 | -0.0019138 | 0.0011883 | -0.0049866 | 0.0011589  |
| Middle | Audience outdegree/total outdegree | 18 | 0.0003656  | 0.0021483 | -0.0051892 | 0.0059204  |
| Middle | Audience outdegree/total outdegree | 19 | -0.0011855 | 0.0019822 | -0.0063109 | 0.0039399  |
| Middle | Audience outdegree/total outdegree | 20 | -0.0055556 | 0.0022531 | -0.0113814 | 0.0002702  |
| Middle | Audience outdegree/total outdegree | 21 | -0.0074395 | 0.0023096 | -0.0134115 | -0.0014674 |
| Middle | Audience outdegree/total outdegree | 22 | -0.0059933 | 0.0024348 | -0.0122891 | 0.0003024  |
| Middle | Audience outdegree/total outdegree | 23 | -0.0097807 | 0.0016067 | -0.0139351 | -0.0056263 |
| Middle | Audience outdegree/total outdegree | 24 | -0.0056245 | 0.0023731 | -0.0117606 | 0.0005116  |
| Middle | Audience outdegree/total outdegree | 25 | -0.0114166 | 0.0022496 | -0.0172335 | -0.0055998 |
| Middle | Audience outdegree/total outdegree | 26 | -0.0097793 | 0.0015576 | -0.0138069 | -0.0057517 |
| Middle | Audience outdegree/total outdegree | 27 | -0.0074505 | 0.0017631 | -0.0120094 | -0.0028915 |
| Middle | Audience outdegree/total outdegree | 28 | -0.0090170 | 0.0019825 | -0.0141431 | -0.0038909 |
| Middle | Audience outdegree/total outdegree | 29 | 0.0044902  | 0.0043515 | -0.0067616 | 0.0157421  |
| Middle | Audience outdegree/total outdegree | 30 | 0.0000428  | 0.0010402 | -0.0026469 | 0.0027326  |
| Middle | Audience outdegree/total outdegree | 31 | -0.0057747 | 0.0058716 | -0.0209570 | 0.0094075  |
| Middle | Audience outdegree/total outdegree | 32 | -0.0038671 | 0.0035428 | -0.0130278 | 0.0052937  |
| Middle | Audience outdegree/total outdegree | 33 | -0.0052834 | 0.0024383 | -0.0115880 | 0.0010213  |
| Middle | Audience outdegree/total outdegree | 34 | -0.0047540 | 0.0016298 | -0.0089684 | -0.0005397 |
| Middle | Audience outdegree/total outdegree | 35 | -0.0033755 | 0.0019909 | -0.0085233 | 0.0017723  |
| Middle | Audience outdegree/total outdegree | 36 | -0.0033432 | 0.0009820 | -0.0058824 | -0.0008041 |
| Middle | Audience outdegree/total outdegree | 37 | -0.0035553 | 0.0013824 | -0.0071297 | 0.0000191  |
| Middle | Audience outdegree/total outdegree | 38 | -0.0027782 | 0.0030754 | -0.0107305 | 0.0051740  |
| Middle | Audience outdegree/total outdegree | 39 | -0.0004104 | 0.0028835 | -0.0078662 | 0.0070455  |
| Middle | Audience outdegree/total outdegree | 40 | -0.0027195 | 0.0018424 | -0.0074835 | 0.0020446  |
| Middle | Audience outdegree/total outdegree | 41 | -0.0028120 | 0.0033006 | -0.0113465 | 0.0057226  |
| Middle | Audience outdegree/total outdegree | 42 | -0.0027217 | 0.0024142 | -0.0089642 | 0.0035208  |
| Middle | Audience outdegree/total outdegree | 43 | -0.0063799 | 0.0042567 | -0.0173866 | 0.0046267  |
| Middle | Audience outdegree/total outdegree | 44 | -0.0051971 | 0.0014731 | -0.0090062 | -0.0013880 |
| Middle | Audience outdegree/total outdegree | 45 | -0.0072256 | 0.0031386 | -0.0153411 | 0.0008899  |
| Middle | Audience outdegree/total outdegree | 47 | -0.0079014 | NA        | NA         | NA         |
| Middle | Audience outdegree/total outdegree | 48 | -0.0086375 | NA        | NA         | NA         |
| Middle | Audience outdegree/total outdegree | 49 | -0.0075432 | NA        | NA         | NA         |
| Middle | Audience outdegree/total outdegree | 50 | -0.0048155 | NA        | NA         | NA         |
| Middle | Audience outdegree/total outdegree | 51 | -0.0039571 | 0.0007346 | -0.0058565 | -0.0020577 |
| Middle | Audience outdegree/total outdegree | 52 | -0.0008426 | 0.0035298 | -0.0099697 | 0.0082845  |

|        |                                    |    |            |           |            |            |
|--------|------------------------------------|----|------------|-----------|------------|------------|
| Middle | Audience outdegree/total outdegree | 53 | -0.0058717 | 0.0010061 | -0.0084734 | -0.0032701 |
| Middle | Audience outdegree/total outdegree | 54 | 0.0005092  | 0.0043227 | -0.0106682 | 0.0116866  |
| Middle | Audience outdegree/total outdegree | 55 | -0.0079326 | 0.0020506 | -0.0132350 | -0.0026302 |
| Middle | Audience outdegree/total outdegree | 56 | -0.0032502 | 0.0047718 | -0.0155890 | 0.0090885  |
| Middle | Audience outdegree/total outdegree | 57 | -0.0076271 | 0.0026641 | -0.0145158 | -0.0007383 |
| Middle | Audience outdegree/total outdegree | 58 | -0.0065771 | 0.0017415 | -0.0110801 | -0.0020741 |
| Middle | Audience outdegree/total outdegree | 59 | -0.0101503 | 0.0081653 | -0.0312637 | 0.0109631  |

| sample | outcome                            | event.time | estimate   | std.error | conf.low   | conf.high  |
|--------|------------------------------------|------------|------------|-----------|------------|------------|
| Least  | Audience outdegree/total outdegree | -44        | 0.0000143  | 0.0019350 | -0.0046842 | 0.0047128  |
| Least  | Audience outdegree/total outdegree | -43        | 0.0037741  | 0.0022587 | -0.0017105 | 0.0092587  |
| Least  | Audience outdegree/total outdegree | -42        | -0.0013118 | 0.0018954 | -0.0059142 | 0.0032906  |
| Least  | Audience outdegree/total outdegree | -41        | -0.0021959 | 0.0019718 | -0.0069837 | 0.0025919  |
| Least  | Audience outdegree/total outdegree | -40        | -0.1593566 | 0.1690351 | -0.5698013 | 0.2510881  |
| Least  | Audience outdegree/total outdegree | -39        | 0.1598557  | 0.1679961 | -0.2480664 | 0.5677777  |
| Least  | Audience outdegree/total outdegree | -38        | 0.0022081  | 0.0030856 | -0.0052842 | 0.0097004  |
| Least  | Audience outdegree/total outdegree | -37        | 0.0019573  | 0.0035795 | -0.0067344 | 0.0106490  |
| Least  | Audience outdegree/total outdegree | -36        | -0.0020430 | 0.0016573 | -0.0060672 | 0.0019811  |
| Least  | Audience outdegree/total outdegree | -35        | 0.0021219  | 0.0020433 | -0.0028396 | 0.0070834  |
| Least  | Audience outdegree/total outdegree | -34        | 0.0036814  | 0.0015117 | 0.0000107  | 0.0073520  |
| Least  | Audience outdegree/total outdegree | -33        | 0.0026038  | 0.0014030 | -0.0008030 | 0.0060106  |
| Least  | Audience outdegree/total outdegree | -32        | 0.0002878  | 0.0018562 | -0.0042194 | 0.0047951  |
| Least  | Audience outdegree/total outdegree | -31        | -0.0041366 | 0.0011512 | -0.0069320 | -0.0013412 |
| Least  | Audience outdegree/total outdegree | -30        | 0.0044222  | 0.0013094 | 0.0012427  | 0.0076016  |
| Least  | Audience outdegree/total outdegree | -29        | -0.0033251 | 0.0013611 | -0.0066299 | -0.0000202 |
| Least  | Audience outdegree/total outdegree | -28        | -0.0009405 | 0.0016474 | -0.0049408 | 0.0030597  |
| Least  | Audience outdegree/total outdegree | -27        | 0.0049430  | 0.0005391 | 0.0036339  | 0.0062520  |
| Least  | Audience outdegree/total outdegree | -26        | -0.0578098 | 0.0650124 | -0.2156706 | 0.1000510  |
| Least  | Audience outdegree/total outdegree | -25        | 0.0548183  | 0.0640654 | -0.1007429 | 0.2103796  |
| Least  | Audience outdegree/total outdegree | -24        | 0.0016352  | 0.0012489 | -0.0013974 | 0.0046677  |
| Least  | Audience outdegree/total outdegree | -23        | -0.0006869 | 0.0019136 | -0.0053336 | 0.0039597  |
| Least  | Audience outdegree/total outdegree | -22        | 0.0011851  | 0.0013422 | -0.0020739 | 0.0044442  |
| Least  | Audience outdegree/total outdegree | -21        | 0.0000569  | 0.0013957 | -0.0033320 | 0.0034459  |
| Least  | Audience outdegree/total outdegree | -20        | 0.0005365  | 0.0005880 | -0.0008912 | 0.0019643  |
| Least  | Audience outdegree/total outdegree | -19        | -0.0018089 | 0.0011921 | -0.0047035 | 0.0010856  |
| Least  | Audience outdegree/total outdegree | -18        | -0.0016959 | 0.0012376 | -0.0047011 | 0.0013092  |
| Least  | Audience outdegree/total outdegree | -17        | 0.0005324  | 0.0008612 | -0.0015586 | 0.0026235  |
| Least  | Audience outdegree/total outdegree | -16        | -0.0014012 | 0.0008561 | -0.0034800 | 0.0006776  |
| Least  | Audience outdegree/total outdegree | -15        | 0.0029797  | 0.0010124 | 0.0005215  | 0.0054380  |
| Least  | Audience outdegree/total outdegree | -14        | 0.0016096  | 0.0014816 | -0.0019879 | 0.0052072  |
| Least  | Audience outdegree/total outdegree | -13        | 0.0846203  | 0.1131653 | -0.1901635 | 0.3594040  |

|       |                                    |     |            |           |            |            |
|-------|------------------------------------|-----|------------|-----------|------------|------------|
| Least | Audience outdegree/total outdegree | -12 | -0.0895044 | 0.1039163 | -0.3418301 | 0.1628212  |
| Least | Audience outdegree/total outdegree | -11 | 0.0033842  | 0.0008979 | 0.0012038  | 0.0055645  |
| Least | Audience outdegree/total outdegree | -10 | -0.0033160 | 0.0008098 | -0.0052824 | -0.0013496 |
| Least | Audience outdegree/total outdegree | -9  | -0.0124672 | 0.0129763 | -0.0439758 | 0.0190415  |
| Least | Audience outdegree/total outdegree | -8  | 0.0129697  | 0.0135248 | -0.0198706 | 0.0458101  |
| Least | Audience outdegree/total outdegree | -7  | -0.0010506 | 0.0017798 | -0.0053723 | 0.0032711  |
| Least | Audience outdegree/total outdegree | -6  | -0.0000982 | 0.0018179 | -0.0045123 | 0.0043159  |
| Least | Audience outdegree/total outdegree | -5  | 0.0012790  | 0.0005916 | -0.0001576 | 0.0027156  |
| Least | Audience outdegree/total outdegree | -4  | -0.0004635 | 0.0007816 | -0.0023613 | 0.0014343  |
| Least | Audience outdegree/total outdegree | -3  | 0.0000468  | 0.0007855 | -0.0018606 | 0.0019541  |
| Least | Audience outdegree/total outdegree | -2  | -0.0017112 | 0.0006943 | -0.0033972 | -0.0000253 |
| Least | Audience outdegree/total outdegree | -1  | 0.0018356  | 0.0013376 | -0.0014123 | 0.0050834  |
| Least | Audience outdegree/total outdegree | 0   | 0.0846732  | 0.0957495 | -0.1478222 | 0.3171685  |
| Least | Audience outdegree/total outdegree | 1   | -0.0045599 | 0.0010864 | -0.0071977 | -0.0019220 |
| Least | Audience outdegree/total outdegree | 2   | -0.0064708 | 0.0010467 | -0.0090122 | -0.0039293 |
| Least | Audience outdegree/total outdegree | 3   | -0.0038998 | 0.0008270 | -0.0059078 | -0.0018918 |
| Least | Audience outdegree/total outdegree | 4   | -0.0064294 | 0.0007050 | -0.0081413 | -0.0047176 |
| Least | Audience outdegree/total outdegree | 5   | -0.0055487 | 0.0013016 | -0.0087092 | -0.0023881 |
| Least | Audience outdegree/total outdegree | 6   | -0.0051606 | 0.0011902 | -0.0080506 | -0.0022707 |
| Least | Audience outdegree/total outdegree | 7   | -0.0064397 | 0.0009643 | -0.0087812 | -0.0040983 |
| Least | Audience outdegree/total outdegree | 8   | -0.0051951 | 0.0007537 | -0.0070252 | -0.0033649 |
| Least | Audience outdegree/total outdegree | 9   | -0.0081621 | 0.0011570 | -0.0109716 | -0.0053527 |
| Least | Audience outdegree/total outdegree | 10  | -0.0080279 | 0.0021508 | -0.0132503 | -0.0028055 |
| Least | Audience outdegree/total outdegree | 11  | -0.0046194 | 0.0013267 | -0.0078408 | -0.0013979 |
| Least | Audience outdegree/total outdegree | 12  | -0.0074418 | 0.0014338 | -0.0109234 | -0.0039602 |
| Least | Audience outdegree/total outdegree | 13  | -0.0068318 | 0.0016309 | -0.0107919 | -0.0028717 |
| Least | Audience outdegree/total outdegree | 14  | -0.0068074 | 0.0013063 | -0.0099793 | -0.0036355 |
| Least | Audience outdegree/total outdegree | 15  | -0.0046292 | 0.0020228 | -0.0095409 | 0.0002825  |
| Least | Audience outdegree/total outdegree | 16  | -0.0036792 | 0.0021321 | -0.0088563 | 0.0014979  |
| Least | Audience outdegree/total outdegree | 17  | -0.0058994 | 0.0027672 | -0.0126186 | 0.0008198  |
| Least | Audience outdegree/total outdegree | 18  | -0.0040569 | 0.0016626 | -0.0080940 | -0.0000198 |
| Least | Audience outdegree/total outdegree | 19  | -0.0049294 | 0.0028917 | -0.0119509 | 0.0020922  |
| Least | Audience outdegree/total outdegree | 20  | -0.0062740 | 0.0013512 | -0.0095550 | -0.0029931 |
| Least | Audience outdegree/total outdegree | 21  | -0.0070892 | 0.0010194 | -0.0095643 | -0.0046140 |
| Least | Audience outdegree/total outdegree | 22  | -0.0082638 | 0.0013338 | -0.0115025 | -0.0050250 |
| Least | Audience outdegree/total outdegree | 23  | -0.0080674 | 0.0012702 | -0.0111517 | -0.0049830 |
| Least | Audience outdegree/total outdegree | 24  | -0.0098023 | 0.0014859 | -0.0134104 | -0.0061942 |
| Least | Audience outdegree/total outdegree | 25  | -0.0073745 | 0.0012498 | -0.0104091 | -0.0043398 |
| Least | Audience outdegree/total outdegree | 26  | -0.0089054 | 0.0015314 | -0.0126239 | -0.0051869 |
| Least | Audience outdegree/total outdegree | 27  | -0.0072823 | 0.0010360 | -0.0097978 | -0.0047668 |
| Least | Audience outdegree/total outdegree | 28  | -0.0081311 | 0.0015722 | -0.0119486 | -0.0043136 |

|       |                                    |    |            |           |            |            |
|-------|------------------------------------|----|------------|-----------|------------|------------|
| Least | Audience outdegree/total outdegree | 29 | -0.0094874 | 0.0044058 | -0.0201855 | 0.0012107  |
| Least | Audience outdegree/total outdegree | 30 | -0.0148635 | 0.0062028 | -0.0299249 | 0.0001979  |
| Least | Audience outdegree/total outdegree | 31 | -0.0063521 | 0.0033433 | -0.0144702 | 0.0017660  |
| Least | Audience outdegree/total outdegree | 32 | -0.0092772 | 0.0042217 | -0.0195283 | 0.0009738  |
| Least | Audience outdegree/total outdegree | 33 | -0.0087297 | 0.0067592 | -0.0251421 | 0.0076827  |
| Least | Audience outdegree/total outdegree | 34 | -0.0052598 | 0.0027604 | -0.0119626 | 0.0014429  |
| Least | Audience outdegree/total outdegree | 35 | -0.0042723 | 0.0020717 | -0.0093028 | 0.0007582  |
| Least | Audience outdegree/total outdegree | 36 | -0.0064877 | 0.0033209 | -0.0145514 | 0.0015761  |
| Least | Audience outdegree/total outdegree | 37 | -0.0053441 | 0.0020359 | -0.0102876 | -0.0004007 |
| Least | Audience outdegree/total outdegree | 38 | -0.0043788 | 0.0032461 | -0.0122609 | 0.0035032  |
| Least | Audience outdegree/total outdegree | 39 | -0.0052018 | 0.0027576 | -0.0118977 | 0.0014942  |
| Least | Audience outdegree/total outdegree | 40 | -0.0053143 | 0.0027639 | -0.0120255 | 0.0013969  |
| Least | Audience outdegree/total outdegree | 41 | -0.0069614 | 0.0014415 | -0.0104616 | -0.0034612 |
| Least | Audience outdegree/total outdegree | 42 | -0.0034235 | 0.0007618 | -0.0052732 | -0.0015738 |
| Least | Audience outdegree/total outdegree | 43 | -0.0099171 | 0.0057728 | -0.0239344 | 0.0041003  |
| Least | Audience outdegree/total outdegree | 44 | -0.0052254 | 0.0041701 | -0.0153511 | 0.0049003  |
| Least | Audience outdegree/total outdegree | 45 | -0.0086335 | 0.0025320 | -0.0147816 | -0.0024854 |
| Least | Audience outdegree/total outdegree | 47 | -0.0197709 | NA        | NA         | NA         |
| Least | Audience outdegree/total outdegree | 48 | -0.0146572 | NA        | NA         | NA         |
| Least | Audience outdegree/total outdegree | 49 | -0.0145026 | NA        | NA         | NA         |
| Least | Audience outdegree/total outdegree | 50 | -0.0165984 | NA        | NA         | NA         |
| Least | Audience outdegree/total outdegree | 51 | -0.0113113 | 0.0048550 | -0.0230999 | 0.0004774  |
| Least | Audience outdegree/total outdegree | 52 | -0.0103792 | 0.0055201 | -0.0237831 | 0.0030246  |
| Least | Audience outdegree/total outdegree | 53 | -0.0144723 | 0.0015017 | -0.0181188 | -0.0108258 |
| Least | Audience outdegree/total outdegree | 54 | -0.0113703 | 0.0020728 | -0.0164035 | -0.0063371 |
| Least | Audience outdegree/total outdegree | 55 | -0.0121561 | 0.0094281 | -0.0350491 | 0.0107369  |
| Least | Audience outdegree/total outdegree | 56 | -0.0099101 | 0.0018143 | -0.0143155 | -0.0055046 |
| Least | Audience outdegree/total outdegree | 57 | -0.0089979 | 0.0032195 | -0.0168154 | -0.0011804 |
| Least | Audience outdegree/total outdegree | 58 | -0.0118440 | 0.0011777 | -0.0147037 | -0.0089843 |
| Least | Audience outdegree/total outdegree | 59 | -0.0135775 | 0.0079189 | -0.0328058 | 0.0056508  |

## Audience indegree/total indegree

Average effect by length of exposure (Callaway and Sant'Anna)

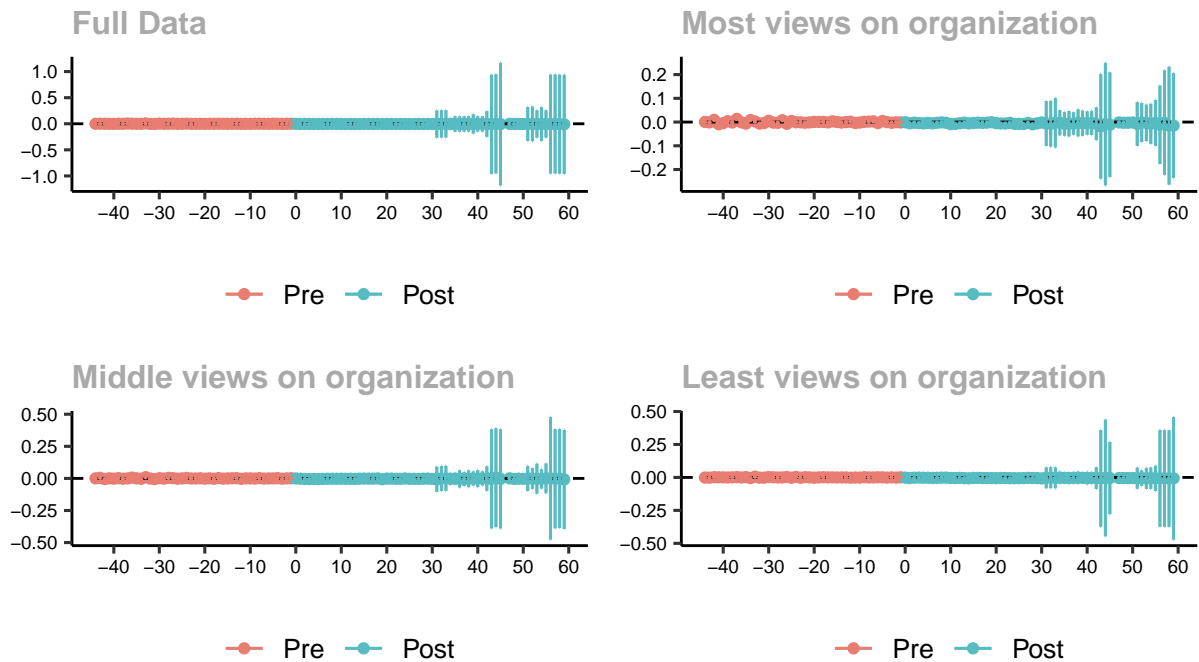

Long timeframe with sampled control groups

| sample | outcome                          | event.time | estimate   | std.error | conf.low   | conf.high |
|--------|----------------------------------|------------|------------|-----------|------------|-----------|
| Full   | Audience indegree/total indegree | -44        | -0.0001645 | 0.0004271 | -0.0012667 | 0.0009377 |
| Full   | Audience indegree/total indegree | -43        | 0.0005147  | 0.0006974 | -0.0012852 | 0.0023147 |
| Full   | Audience indegree/total indegree | -42        | 0.0007051  | 0.0007779 | -0.0013025 | 0.0027127 |
| Full   | Audience indegree/total indegree | -41        | -0.0016197 | 0.0042918 | -0.0126962 | 0.0094567 |
| Full   | Audience indegree/total indegree | -40        | -0.0016810 | 0.0049865 | -0.0145505 | 0.0111884 |
| Full   | Audience indegree/total indegree | -39        | 0.0012926  | 0.0039827 | -0.0089861 | 0.0115714 |
| Full   | Audience indegree/total indegree | -38        | -0.0011122 | 0.0035515 | -0.0102780 | 0.0080535 |
| Full   | Audience indegree/total indegree | -37        | 0.0038805  | 0.0010959 | 0.0010522  | 0.0067088 |
| Full   | Audience indegree/total indegree | -36        | 0.0017136  | 0.0004522 | 0.0005464  | 0.0028807 |
| Full   | Audience indegree/total indegree | -35        | -0.0004525 | 0.0014139 | -0.0041017 | 0.0031967 |
| Full   | Audience indegree/total indegree | -34        | -0.0011843 | 0.0015051 | -0.0050687 | 0.0027000 |
| Full   | Audience indegree/total indegree | -33        | 0.0063244  | 0.0010694 | 0.0035644  | 0.0090843 |
| Full   | Audience indegree/total indegree | -32        | -0.0026553 | 0.0023255 | -0.0086571 | 0.0033466 |
| Full   | Audience indegree/total indegree | -31        | -0.0036227 | 0.0025024 | -0.0100809 | 0.0028356 |
| Full   | Audience indegree/total indegree | -30        | 0.0028877  | 0.0008317 | 0.0007413  | 0.0050341 |
| Full   | Audience indegree/total indegree | -29        | -0.0008067 | 0.0005296 | -0.0021736 | 0.0005602 |
| Full   | Audience indegree/total indegree | -28        | 0.0003893  | 0.0006689 | -0.0013370 | 0.0021156 |
| Full   | Audience indegree/total indegree | -27        | 0.0024197  | 0.0017959 | -0.0022151 | 0.0070545 |
| Full   | Audience indegree/total indegree | -26        | -0.0013661 | 0.0017522 | -0.0058882 | 0.0031560 |

|      |                                  |     |            |           |            |            |
|------|----------------------------------|-----|------------|-----------|------------|------------|
| Full | Audience indegree/total indegree | -25 | -0.0000748 | 0.0009640 | -0.0025627 | 0.0024132  |
| Full | Audience indegree/total indegree | -24 | 0.0024984  | 0.0011468 | -0.0004614 | 0.0054581  |
| Full | Audience indegree/total indegree | -23 | -0.0013101 | 0.0006014 | -0.0028622 | 0.0002420  |
| Full | Audience indegree/total indegree | -22 | -0.0002606 | 0.0005350 | -0.0016415 | 0.0011202  |
| Full | Audience indegree/total indegree | -21 | 0.0000439  | 0.0005938 | -0.0014885 | 0.0015764  |
| Full | Audience indegree/total indegree | -20 | -0.0015356 | 0.0009094 | -0.0038826 | 0.0008114  |
| Full | Audience indegree/total indegree | -19 | 0.0003816  | 0.0008840 | -0.0019000 | 0.0026632  |
| Full | Audience indegree/total indegree | -18 | -0.0001927 | 0.0010591 | -0.0029261 | 0.0025408  |
| Full | Audience indegree/total indegree | -17 | 0.0008291  | 0.0006409 | -0.0008251 | 0.0024832  |
| Full | Audience indegree/total indegree | -16 | 0.0000611  | 0.0006523 | -0.0016225 | 0.0017446  |
| Full | Audience indegree/total indegree | -15 | -0.0003342 | 0.0004498 | -0.0014951 | 0.0008268  |
| Full | Audience indegree/total indegree | -14 | -0.0001765 | 0.0010236 | -0.0028182 | 0.0024652  |
| Full | Audience indegree/total indegree | -13 | 0.0005212  | 0.0011909 | -0.0025524 | 0.0035948  |
| Full | Audience indegree/total indegree | -12 | -0.0016230 | 0.0017129 | -0.0060436 | 0.0027976  |
| Full | Audience indegree/total indegree | -11 | -0.0011933 | 0.0016693 | -0.0055016 | 0.0031150  |
| Full | Audience indegree/total indegree | -10 | -0.0012586 | 0.0006366 | -0.0029016 | 0.0003843  |
| Full | Audience indegree/total indegree | -9  | 0.0004376  | 0.0007643 | -0.0015350 | 0.0024102  |
| Full | Audience indegree/total indegree | -8  | 0.0009977  | 0.0008071 | -0.0010854 | 0.0030808  |
| Full | Audience indegree/total indegree | -7  | -0.0000432 | 0.0004725 | -0.0012627 | 0.0011762  |
| Full | Audience indegree/total indegree | -6  | -0.0007500 | 0.0010641 | -0.0034963 | 0.0019963  |
| Full | Audience indegree/total indegree | -5  | 0.0011610  | 0.0006037 | -0.0003970 | 0.0027190  |
| Full | Audience indegree/total indegree | -4  | 0.0001543  | 0.0009769 | -0.0023669 | 0.0026755  |
| Full | Audience indegree/total indegree | -3  | -0.0014389 | 0.0009139 | -0.0037976 | 0.0009199  |
| Full | Audience indegree/total indegree | -2  | -0.0006485 | 0.0007800 | -0.0026616 | 0.0013647  |
| Full | Audience indegree/total indegree | -1  | 0.0006059  | 0.0003132 | -0.0002025 | 0.0014142  |
| Full | Audience indegree/total indegree | 0   | -0.0012083 | 0.0007473 | -0.0031369 | 0.0007203  |
| Full | Audience indegree/total indegree | 1   | -0.0040756 | 0.0005881 | -0.0055935 | -0.0025577 |
| Full | Audience indegree/total indegree | 2   | -0.0032244 | 0.0007218 | -0.0050874 | -0.0013614 |
| Full | Audience indegree/total indegree | 3   | -0.0034805 | 0.0010922 | -0.0062994 | -0.0006616 |
| Full | Audience indegree/total indegree | 4   | -0.0040579 | 0.0012887 | -0.0073838 | -0.0007320 |
| Full | Audience indegree/total indegree | 5   | -0.0037243 | 0.0012139 | -0.0068573 | -0.0005913 |
| Full | Audience indegree/total indegree | 6   | -0.0041507 | 0.0005233 | -0.0055012 | -0.0028001 |
| Full | Audience indegree/total indegree | 7   | -0.0031413 | 0.0009096 | -0.0054889 | -0.0007938 |
| Full | Audience indegree/total indegree | 8   | -0.0020836 | 0.0012448 | -0.0052963 | 0.0011291  |
| Full | Audience indegree/total indegree | 9   | -0.0024625 | 0.0006818 | -0.0042222 | -0.0007028 |
| Full | Audience indegree/total indegree | 10  | -0.0045353 | 0.0007158 | -0.0063828 | -0.0026879 |
| Full | Audience indegree/total indegree | 11  | -0.0048600 | 0.0010479 | -0.0075645 | -0.0021554 |
| Full | Audience indegree/total indegree | 12  | -0.0035975 | 0.0013777 | -0.0071531 | -0.0000419 |
| Full | Audience indegree/total indegree | 13  | -0.0043350 | 0.0005020 | -0.0056305 | -0.0030395 |
| Full | Audience indegree/total indegree | 14  | -0.0045437 | 0.0004757 | -0.0057715 | -0.0033159 |
| Full | Audience indegree/total indegree | 15  | -0.0031003 | 0.0004494 | -0.0042601 | -0.0019405 |



|      |                                  |    |            |           |            |            |
|------|----------------------------------|----|------------|-----------|------------|------------|
| Full | Audience indegree/total indegree | 16 | -0.0025869 | 0.0013115 | -0.0059718 | 0.0007980  |
| Full | Audience indegree/total indegree | 17 | -0.0033410 | 0.0029526 | -0.0109612 | 0.0042793  |
| Full | Audience indegree/total indegree | 18 | -0.0025055 | 0.0018107 | -0.0071786 | 0.0021677  |
| Full | Audience indegree/total indegree | 19 | -0.0045098 | 0.0009828 | -0.0070462 | -0.0019734 |
| Full | Audience indegree/total indegree | 20 | -0.0039436 | 0.0006510 | -0.0056236 | -0.0022635 |
| Full | Audience indegree/total indegree | 21 | -0.0037696 | 0.0009222 | -0.0061496 | -0.0013897 |
| Full | Audience indegree/total indegree | 22 | -0.0045994 | 0.0009768 | -0.0071204 | -0.0020784 |
| Full | Audience indegree/total indegree | 23 | -0.0044688 | 0.0006408 | -0.0061226 | -0.0028149 |
| Full | Audience indegree/total indegree | 24 | -0.0043554 | 0.0005305 | -0.0057245 | -0.0029863 |
| Full | Audience indegree/total indegree | 25 | -0.0053702 | 0.0009474 | -0.0078152 | -0.0029252 |
| Full | Audience indegree/total indegree | 26 | -0.0051345 | 0.0009508 | -0.0075882 | -0.0026807 |
| Full | Audience indegree/total indegree | 27 | -0.0037626 | 0.0009277 | -0.0061567 | -0.0013685 |
| Full | Audience indegree/total indegree | 28 | -0.0047330 | 0.0013806 | -0.0082961 | -0.0011698 |
| Full | Audience indegree/total indegree | 29 | -0.0042077 | 0.0036686 | -0.0136759 | 0.0052605  |
| Full | Audience indegree/total indegree | 30 | -0.0053313 | 0.0042619 | -0.0163307 | 0.0056681  |
| Full | Audience indegree/total indegree | 31 | -0.0051174 | 0.1008061 | -0.2652826 | 0.2550477  |
| Full | Audience indegree/total indegree | 32 | -0.0025203 | 0.1008061 | -0.2626855 | 0.2576448  |
| Full | Audience indegree/total indegree | 33 | -0.0014940 | 0.1008061 | -0.2616592 | 0.2586711  |
| Full | Audience indegree/total indegree | 34 | -0.0027743 | 0.0414323 | -0.1097048 | 0.1041561  |
| Full | Audience indegree/total indegree | 35 | -0.0036124 | 0.0564288 | -0.1492465 | 0.1420217  |
| Full | Audience indegree/total indegree | 36 | -0.0047488 | 0.0563342 | -0.1501387 | 0.1406411  |
| Full | Audience indegree/total indegree | 37 | -0.0041389 | 0.0563116 | -0.1494705 | 0.1411927  |
| Full | Audience indegree/total indegree | 38 | -0.0030381 | 0.0563318 | -0.1484220 | 0.1423457  |
| Full | Audience indegree/total indegree | 39 | -0.0028201 | 0.0711830 | -0.1865325 | 0.1808924  |
| Full | Audience indegree/total indegree | 40 | -0.0034416 | 0.0562318 | -0.1485673 | 0.1416842  |
| Full | Audience indegree/total indegree | 41 | -0.0025069 | 0.0562982 | -0.1478041 | 0.1427903  |
| Full | Audience indegree/total indegree | 42 | -0.0040936 | 0.0948915 | -0.2489941 | 0.2408068  |
| Full | Audience indegree/total indegree | 43 | -0.0090453 | 0.3672407 | -0.9568377 | 0.9387471  |
| Full | Audience indegree/total indegree | 44 | -0.0018591 | 0.3672407 | -0.9496514 | 0.9459333  |
| Full | Audience indegree/total indegree | 45 | -0.0064059 | 0.4546831 | -1.1798740 | 1.1670622  |
| Full | Audience indegree/total indegree | 47 | -0.0021325 | NA        | NA         | NA         |
| Full | Audience indegree/total indegree | 48 | -0.0041816 | NA        | NA         | NA         |
| Full | Audience indegree/total indegree | 49 | -0.0036928 | NA        | NA         | NA         |
| Full | Audience indegree/total indegree | 50 | -0.0038028 | NA        | NA         | NA         |
| Full | Audience indegree/total indegree | 51 | -0.0041758 | 0.1256002 | -0.3283308 | 0.3199791  |
| Full | Audience indegree/total indegree | 52 | -0.0028071 | 0.1282972 | -0.3339227 | 0.3283085  |
| Full | Audience indegree/total indegree | 53 | -0.0045058 | 0.1008061 | -0.2646710 | 0.2556593  |
| Full | Audience indegree/total indegree | 54 | -0.0051158 | 0.1264310 | -0.3314149 | 0.3211833  |
| Full | Audience indegree/total indegree | 55 | -0.0035512 | 0.1008061 | -0.2637163 | 0.2566140  |
| Full | Audience indegree/total indegree | 56 | -0.0056416 | 0.3672407 | -0.9534340 | 0.9421507  |
| Full | Audience indegree/total indegree | 57 | -0.0040510 | 0.3672407 | -0.9518434 | 0.9437414  |

|      |                                  |    |            |           |            |           |
|------|----------------------------------|----|------------|-----------|------------|-----------|
| Full | Audience indegree/total indegree | 58 | -0.0080507 | 0.3672407 | -0.9558431 | 0.9397417 |
| Full | Audience indegree/total indegree | 59 | -0.0097282 | 0.3672407 | -0.9575205 | 0.9380642 |

| sample | outcome                          | event.time | estimate   | std.error | conf.low   | conf.high  |
|--------|----------------------------------|------------|------------|-----------|------------|------------|
| Most   | Audience indegree/total indegree | -44        | 0.0004794  | 0.0022392 | -0.0053918 | 0.0063507  |
| Most   | Audience indegree/total indegree | -43        | -0.0014375 | 0.0022342 | -0.0072957 | 0.0044207  |
| Most   | Audience indegree/total indegree | -42        | 0.0090355  | 0.0020783 | 0.0035860  | 0.0144850  |
| Most   | Audience indegree/total indegree | -41        | -0.0088141 | 0.0040316 | -0.0193853 | 0.0017571  |
| Most   | Audience indegree/total indegree | -40        | -0.0044285 | 0.0058474 | -0.0197609 | 0.0109038  |
| Most   | Audience indegree/total indegree | -39        | 0.0035013  | 0.0047449 | -0.0089403 | 0.0159429  |
| Most   | Audience indegree/total indegree | -38        | -0.0015970 | 0.0034123 | -0.0105444 | 0.0073505  |
| Most   | Audience indegree/total indegree | -37        | 0.0134967  | 0.0030940 | 0.0053840  | 0.0216095  |
| Most   | Audience indegree/total indegree | -36        | -0.0013999 | 0.0024732 | -0.0078849 | 0.0050850  |
| Most   | Audience indegree/total indegree | -35        | -0.0061812 | 0.0024465 | -0.0125961 | 0.0002338  |
| Most   | Audience indegree/total indegree | -34        | 0.0084525  | 0.0023861 | 0.0021959  | 0.0147091  |
| Most   | Audience indegree/total indegree | -33        | 0.0024875  | 0.0019745 | -0.0026897 | 0.0076648  |
| Most   | Audience indegree/total indegree | -32        | -0.0062995 | 0.0020958 | -0.0117949 | -0.0008041 |
| Most   | Audience indegree/total indegree | -31        | -0.0040726 | 0.0024796 | -0.0105743 | 0.0024292  |
| Most   | Audience indegree/total indegree | -30        | 0.0053423  | 0.0025369 | -0.0013096 | 0.0119941  |
| Most   | Audience indegree/total indegree | -29        | -0.0023786 | 0.0017463 | -0.0069576 | 0.0022004  |
| Most   | Audience indegree/total indegree | -28        | -0.0030346 | 0.0024891 | -0.0095613 | 0.0034921  |
| Most   | Audience indegree/total indegree | -27        | 0.0077622  | 0.0021644 | 0.0020869  | 0.0134375  |
| Most   | Audience indegree/total indegree | -26        | -0.0073072 | 0.0032746 | -0.0158935 | 0.0012790  |
| Most   | Audience indegree/total indegree | -25        | 0.0045275  | 0.0020850 | -0.0009397 | 0.0099946  |
| Most   | Audience indegree/total indegree | -24        | -0.0007532 | 0.0014125 | -0.0044570 | 0.0029505  |
| Most   | Audience indegree/total indegree | -23        | -0.0010449 | 0.0033733 | -0.0098899 | 0.0078001  |
| Most   | Audience indegree/total indegree | -22        | -0.0028349 | 0.0018973 | -0.0078099 | 0.0021401  |
| Most   | Audience indegree/total indegree | -21        | -0.0012368 | 0.0014503 | -0.0050396 | 0.0025660  |
| Most   | Audience indegree/total indegree | -20        | 0.0005364  | 0.0029775 | -0.0072707 | 0.0083436  |
| Most   | Audience indegree/total indegree | -19        | 0.0007769  | 0.0020850 | -0.0046901 | 0.0062440  |
| Most   | Audience indegree/total indegree | -18        | 0.0008247  | 0.0026613 | -0.0061534 | 0.0078028  |
| Most   | Audience indegree/total indegree | -17        | -0.0014459 | 0.0014273 | -0.0051884 | 0.0022965  |
| Most   | Audience indegree/total indegree | -16        | 0.0030212  | 0.0011113 | 0.0001073  | 0.0059350  |
| Most   | Audience indegree/total indegree | -15        | 0.0004093  | 0.0006158 | -0.0012053 | 0.0020239  |
| Most   | Audience indegree/total indegree | -14        | -0.0020254 | 0.0010504 | -0.0047796 | 0.0007288  |
| Most   | Audience indegree/total indegree | -13        | -0.0001690 | 0.0025089 | -0.0067476 | 0.0064095  |
| Most   | Audience indegree/total indegree | -12        | 0.0013457  | 0.0019709 | -0.0038222 | 0.0065135  |
| Most   | Audience indegree/total indegree | -11        | -0.0039206 | 0.0016378 | -0.0082152 | 0.0003740  |
| Most   | Audience indegree/total indegree | -10        | -0.0019314 | 0.0011313 | -0.0048977 | 0.0010349  |
| Most   | Audience indegree/total indegree | -9         | 0.0009441  | 0.0026807 | -0.0060849 | 0.0079731  |
| Most   | Audience indegree/total indegree | -8         | 0.0018627  | 0.0029332 | -0.0058285 | 0.0095539  |

|      |                                  |    |            |           |            |            |
|------|----------------------------------|----|------------|-----------|------------|------------|
| Most | Audience indegree/total indegree | -7 | 0.0030254  | 0.0013981 | -0.0006404 | 0.0066913  |
| Most | Audience indegree/total indegree | -6 | -0.0042441 | 0.0021503 | -0.0098824 | 0.0013942  |
| Most | Audience indegree/total indegree | -5 | 0.0044430  | 0.0023881 | -0.0018188 | 0.0107049  |
| Most | Audience indegree/total indegree | -4 | -0.0001906 | 0.0019604 | -0.0053309 | 0.0049497  |
| Most | Audience indegree/total indegree | -3 | -0.0029652 | 0.0021072 | -0.0084904 | 0.0025600  |
| Most | Audience indegree/total indegree | -2 | -0.0008257 | 0.0018847 | -0.0057676 | 0.0041161  |
| Most | Audience indegree/total indegree | -1 | -0.0015187 | 0.0010384 | -0.0042416 | 0.0012041  |
| Most | Audience indegree/total indegree | 0  | -0.0005580 | 0.0014130 | -0.0042630 | 0.0031471  |
| Most | Audience indegree/total indegree | 1  | -0.0051160 | 0.0008255 | -0.0072807 | -0.0029514 |
| Most | Audience indegree/total indegree | 2  | -0.0026369 | 0.0014372 | -0.0064054 | 0.0011317  |
| Most | Audience indegree/total indegree | 3  | -0.0043973 | 0.0020053 | -0.0096553 | 0.0008607  |
| Most | Audience indegree/total indegree | 4  | -0.0053911 | 0.0025263 | -0.0120154 | 0.0012332  |
| Most | Audience indegree/total indegree | 5  | -0.0034816 | 0.0021915 | -0.0092278 | 0.0022646  |
| Most | Audience indegree/total indegree | 6  | -0.0054155 | 0.0009803 | -0.0079860 | -0.0028450 |
| Most | Audience indegree/total indegree | 7  | -0.0030108 | 0.0013689 | -0.0066003 | 0.0005787  |
| Most | Audience indegree/total indegree | 8  | -0.0013463 | 0.0025240 | -0.0079645 | 0.0052719  |
| Most | Audience indegree/total indegree | 9  | -0.0031207 | 0.0009438 | -0.0055956 | -0.0006459 |
| Most | Audience indegree/total indegree | 10 | -0.0085923 | 0.0015295 | -0.0126027 | -0.0045819 |
| Most | Audience indegree/total indegree | 11 | -0.0076330 | 0.0015110 | -0.0115951 | -0.0036710 |
| Most | Audience indegree/total indegree | 12 | -0.0048940 | 0.0018156 | -0.0096547 | -0.0001333 |
| Most | Audience indegree/total indegree | 13 | -0.0026748 | 0.0021482 | -0.0083075 | 0.0029578  |
| Most | Audience indegree/total indegree | 14 | -0.0056796 | 0.0016711 | -0.0100613 | -0.0012979 |
| Most | Audience indegree/total indegree | 15 | -0.0040114 | 0.0025827 | -0.0107835 | 0.0027607  |
| Most | Audience indegree/total indegree | 16 | -0.0025145 | 0.0032053 | -0.0109190 | 0.0058900  |
| Most | Audience indegree/total indegree | 17 | -0.0034009 | 0.0036936 | -0.0130858 | 0.0062839  |
| Most | Audience indegree/total indegree | 18 | -0.0024226 | 0.0028964 | -0.0100171 | 0.0051719  |
| Most | Audience indegree/total indegree | 19 | -0.0006572 | 0.0021069 | -0.0061817 | 0.0048674  |
| Most | Audience indegree/total indegree | 20 | -0.0046194 | 0.0014751 | -0.0084872 | -0.0007517 |
| Most | Audience indegree/total indegree | 21 | -0.0060548 | 0.0020610 | -0.0114589 | -0.0006507 |
| Most | Audience indegree/total indegree | 22 | -0.0060710 | 0.0024567 | -0.0125127 | 0.0003706  |
| Most | Audience indegree/total indegree | 23 | -0.0033149 | 0.0013405 | -0.0068298 | 0.0002000  |
| Most | Audience indegree/total indegree | 24 | -0.0075468 | 0.0010661 | -0.0103423 | -0.0047513 |
| Most | Audience indegree/total indegree | 25 | -0.0075531 | 0.0018479 | -0.0123984 | -0.0027078 |
| Most | Audience indegree/total indegree | 26 | -0.0082295 | 0.0016196 | -0.0124763 | -0.0039826 |
| Most | Audience indegree/total indegree | 27 | -0.0035150 | 0.0014584 | -0.0073392 | 0.0003091  |
| Most | Audience indegree/total indegree | 28 | -0.0092260 | 0.0024527 | -0.0156573 | -0.0027947 |
| Most | Audience indegree/total indegree | 29 | -0.0056695 | 0.0056339 | -0.0204422 | 0.0091032  |
| Most | Audience indegree/total indegree | 30 | -0.0015887 | 0.0063865 | -0.0183347 | 0.0151573  |
| Most | Audience indegree/total indegree | 31 | -0.0063487 | 0.0359697 | -0.1006644 | 0.0879670  |
| Most | Audience indegree/total indegree | 32 | -0.0069812 | 0.0366716 | -0.1031373 | 0.0891749  |
| Most | Audience indegree/total indegree | 33 | -0.0027688 | 0.0396040 | -0.1066140 | 0.1010764  |

|      |                                  |    |            |           |            |           |
|------|----------------------------------|----|------------|-----------|------------|-----------|
| Most | Audience indegree/total indegree | 34 | -0.0028618 | 0.0201348 | -0.0556569 | 0.0499334 |
| Most | Audience indegree/total indegree | 35 | -0.0073306 | 0.0190198 | -0.0572021 | 0.0425409 |
| Most | Audience indegree/total indegree | 36 | -0.0068472 | 0.0203297 | -0.0601535 | 0.0464591 |
| Most | Audience indegree/total indegree | 37 | -0.0061368 | 0.0179184 | -0.0531203 | 0.0408468 |
| Most | Audience indegree/total indegree | 38 | -0.0035260 | 0.0215697 | -0.0600838 | 0.0530317 |
| Most | Audience indegree/total indegree | 39 | -0.0050061 | 0.0202534 | -0.0581124 | 0.0481001 |
| Most | Audience indegree/total indegree | 40 | -0.0040708 | 0.0186191 | -0.0528917 | 0.0447500 |
| Most | Audience indegree/total indegree | 41 | -0.0036992 | 0.0193143 | -0.0543430 | 0.0469446 |
| Most | Audience indegree/total indegree | 42 | -0.0072364 | 0.0262403 | -0.0760409 | 0.0615681 |
| Most | Audience indegree/total indegree | 43 | -0.0177611 | 0.0840328 | -0.2381026 | 0.2025805 |
| Most | Audience indegree/total indegree | 44 | -0.0085452 | 0.0983440 | -0.2664119 | 0.2493215 |
| Most | Audience indegree/total indegree | 45 | -0.0112628 | 0.0840328 | -0.2316044 | 0.2090788 |
| Most | Audience indegree/total indegree | 47 | -0.0015964 | NA        | NA         | NA        |
| Most | Audience indegree/total indegree | 48 | -0.0028268 | NA        | NA         | NA        |
| Most | Audience indegree/total indegree | 49 | -0.0026322 | NA        | NA         | NA        |
| Most | Audience indegree/total indegree | 50 | -0.0017928 | NA        | NA         | NA        |
| Most | Audience indegree/total indegree | 51 | -0.0079637 | 0.0353076 | -0.1005434 | 0.0846160 |
| Most | Audience indegree/total indegree | 52 | -0.0019482 | 0.0312942 | -0.0840045 | 0.0801080 |
| Most | Audience indegree/total indegree | 53 | -0.0033866 | 0.0291929 | -0.0799331 | 0.0731598 |
| Most | Audience indegree/total indegree | 54 | -0.0073077 | 0.0320927 | -0.0914577 | 0.0768422 |
| Most | Audience indegree/total indegree | 55 | -0.0035560 | 0.0368208 | -0.1001034 | 0.0929913 |
| Most | Audience indegree/total indegree | 56 | -0.0114865 | 0.0628844 | -0.1763750 | 0.1534019 |
| Most | Audience indegree/total indegree | 57 | -0.0024069 | 0.0840328 | -0.2227485 | 0.2179346 |
| Most | Audience indegree/total indegree | 58 | -0.0151060 | 0.0945226 | -0.2629526 | 0.2327406 |
| Most | Audience indegree/total indegree | 59 | -0.0148555 | 0.0840328 | -0.2351971 | 0.2054860 |

| sample | outcome                          | event.time | estimate   | std.error | conf.low   | conf.high  |
|--------|----------------------------------|------------|------------|-----------|------------|------------|
| Middle | Audience indegree/total indegree | -44        | 0.0005331  | 0.0023996 | -0.0060865 | 0.0071527  |
| Middle | Audience indegree/total indegree | -43        | 0.0042504  | 0.0033447 | -0.0049763 | 0.0134772  |
| Middle | Audience indegree/total indegree | -42        | -0.0054050 | 0.0011568 | -0.0085961 | -0.0022139 |
| Middle | Audience indegree/total indegree | -41        | 0.0004348  | 0.0043865 | -0.0116659 | 0.0125355  |
| Middle | Audience indegree/total indegree | -40        | -0.0023181 | 0.0048018 | -0.0155646 | 0.0109284  |
| Middle | Audience indegree/total indegree | -39        | 0.0019809  | 0.0037455 | -0.0083517 | 0.0123135  |
| Middle | Audience indegree/total indegree | -38        | -0.0024521 | 0.0037445 | -0.0127818 | 0.0078775  |
| Middle | Audience indegree/total indegree | -37        | -0.0004375 | 0.0011799 | -0.0036926 | 0.0028175  |
| Middle | Audience indegree/total indegree | -36        | 0.0059844  | 0.0015850 | 0.0016120  | 0.0103568  |
| Middle | Audience indegree/total indegree | -35        | 0.0003087  | 0.0021976 | -0.0057538 | 0.0063712  |
| Middle | Audience indegree/total indegree | -34        | -0.0031303 | 0.0021600 | -0.0090889 | 0.0028284  |
| Middle | Audience indegree/total indegree | -33        | 0.0093070  | 0.0010263 | 0.0064757  | 0.0121383  |
| Middle | Audience indegree/total indegree | -32        | -0.0012401 | 0.0022552 | -0.0074615 | 0.0049812  |
| Middle | Audience indegree/total indegree | -31        | -0.0049376 | 0.0024060 | -0.0115749 | 0.0016997  |

|        |                                  |     |            |           |            |            |
|--------|----------------------------------|-----|------------|-----------|------------|------------|
| Middle | Audience indegree/total indegree | -30 | 0.0015719  | 0.0012675 | -0.0019246 | 0.0050685  |
| Middle | Audience indegree/total indegree | -29 | -0.0017187 | 0.0014634 | -0.0057556 | 0.0023182  |
| Middle | Audience indegree/total indegree | -28 | 0.0037316  | 0.0010501 | 0.0008348  | 0.0066284  |
| Middle | Audience indegree/total indegree | -27 | 0.0016196  | 0.0017151 | -0.0031117 | 0.0063508  |
| Middle | Audience indegree/total indegree | -26 | -0.0022444 | 0.0021196 | -0.0080915 | 0.0036027  |
| Middle | Audience indegree/total indegree | -25 | -0.0003715 | 0.0018994 | -0.0056112 | 0.0048682  |
| Middle | Audience indegree/total indegree | -24 | 0.0031334  | 0.0012721 | -0.0003758 | 0.0066426  |
| Middle | Audience indegree/total indegree | -23 | -0.0005164 | 0.0008531 | -0.0028699 | 0.0018370  |
| Middle | Audience indegree/total indegree | -22 | -0.0007732 | 0.0009739 | -0.0034598 | 0.0019133  |
| Middle | Audience indegree/total indegree | -21 | 0.0008016  | 0.0013121 | -0.0028180 | 0.0044212  |
| Middle | Audience indegree/total indegree | -20 | -0.0021622 | 0.0013660 | -0.0059304 | 0.0016060  |
| Middle | Audience indegree/total indegree | -19 | 0.0006650  | 0.0009321 | -0.0019062 | 0.0032362  |
| Middle | Audience indegree/total indegree | -18 | -0.0027434 | 0.0015543 | -0.0070311 | 0.0015442  |
| Middle | Audience indegree/total indegree | -17 | 0.0026927  | 0.0016593 | -0.0018848 | 0.0072701  |
| Middle | Audience indegree/total indegree | -16 | -0.0018229 | 0.0011080 | -0.0048794 | 0.0012335  |
| Middle | Audience indegree/total indegree | -15 | -0.0003964 | 0.0009649 | -0.0030583 | 0.0022654  |
| Middle | Audience indegree/total indegree | -14 | 0.0010854  | 0.0012442 | -0.0023469 | 0.0045176  |
| Middle | Audience indegree/total indegree | -13 | 0.0017887  | 0.0020257 | -0.0037996 | 0.0073769  |
| Middle | Audience indegree/total indegree | -12 | -0.0032294 | 0.0025807 | -0.0103486 | 0.0038898  |
| Middle | Audience indegree/total indegree | -11 | 0.0001295  | 0.0014872 | -0.0039732 | 0.0042321  |
| Middle | Audience indegree/total indegree | -10 | -0.0000290 | 0.0018142 | -0.0050338 | 0.0049758  |
| Middle | Audience indegree/total indegree | -9  | -0.0013201 | 0.0013129 | -0.0049418 | 0.0023016  |
| Middle | Audience indegree/total indegree | -8  | 0.0019263  | 0.0010408 | -0.0009447 | 0.0047974  |
| Middle | Audience indegree/total indegree | -7  | -0.0016454 | 0.0015750 | -0.0059904 | 0.0026996  |
| Middle | Audience indegree/total indegree | -6  | -0.0003604 | 0.0012827 | -0.0038990 | 0.0031782  |
| Middle | Audience indegree/total indegree | -5  | -0.0001252 | 0.0007572 | -0.0022140 | 0.0019635  |
| Middle | Audience indegree/total indegree | -4  | 0.0018880  | 0.0008213 | -0.0003776 | 0.0041537  |
| Middle | Audience indegree/total indegree | -3  | -0.0022157 | 0.0016463 | -0.0067573 | 0.0023259  |
| Middle | Audience indegree/total indegree | -2  | -0.0002151 | 0.0010209 | -0.0030315 | 0.0026013  |
| Middle | Audience indegree/total indegree | -1  | 0.0013141  | 0.0011004 | -0.0017216 | 0.0043498  |
| Middle | Audience indegree/total indegree | 0   | -0.0007684 | 0.0013397 | -0.0044642 | 0.0029275  |
| Middle | Audience indegree/total indegree | 1   | -0.0024885 | 0.0013240 | -0.0061411 | 0.0011640  |
| Middle | Audience indegree/total indegree | 2   | -0.0042641 | 0.0006727 | -0.0061199 | -0.0024084 |
| Middle | Audience indegree/total indegree | 3   | -0.0048157 | 0.0012977 | -0.0083956 | -0.0012359 |
| Middle | Audience indegree/total indegree | 4   | -0.0042659 | 0.0008477 | -0.0066045 | -0.0019273 |
| Middle | Audience indegree/total indegree | 5   | -0.0050278 | 0.0008944 | -0.0074953 | -0.0025604 |
| Middle | Audience indegree/total indegree | 6   | -0.0036568 | 0.0016672 | -0.0082559 | 0.0009423  |
| Middle | Audience indegree/total indegree | 7   | -0.0029470 | 0.0008214 | -0.0052130 | -0.0006809 |
| Middle | Audience indegree/total indegree | 8   | -0.0027471 | 0.0007369 | -0.0047799 | -0.0007142 |
| Middle | Audience indegree/total indegree | 9   | -0.0028110 | 0.0013082 | -0.0064198 | 0.0007978  |
| Middle | Audience indegree/total indegree | 10  | -0.0024234 | 0.0005049 | -0.0038163 | -0.0010305 |

|        |                                  |    |            |           |            |            |
|--------|----------------------------------|----|------------|-----------|------------|------------|
| Middle | Audience indegree/total indegree | 11 | -0.0033355 | 0.0011366 | -0.0064711 | -0.0001999 |
| Middle | Audience indegree/total indegree | 12 | -0.0029974 | 0.0010973 | -0.0060245 | 0.0000297  |
| Middle | Audience indegree/total indegree | 13 | -0.0041679 | 0.0010744 | -0.0071319 | -0.0012040 |
| Middle | Audience indegree/total indegree | 14 | -0.0020660 | 0.0005348 | -0.0035413 | -0.0005906 |
| Middle | Audience indegree/total indegree | 15 | -0.0015757 | 0.0016124 | -0.0060237 | 0.0028723  |
| Middle | Audience indegree/total indegree | 16 | -0.0017867 | 0.0019079 | -0.0070498 | 0.0034764  |
| Middle | Audience indegree/total indegree | 17 | -0.0021026 | 0.0021468 | -0.0080248 | 0.0038197  |
| Middle | Audience indegree/total indegree | 18 | -0.0003821 | 0.0014568 | -0.0044009 | 0.0036367  |
| Middle | Audience indegree/total indegree | 19 | -0.0062775 | 0.0015790 | -0.0106335 | -0.0019215 |
| Middle | Audience indegree/total indegree | 20 | -0.0015997 | 0.0010781 | -0.0045737 | 0.0013743  |
| Middle | Audience indegree/total indegree | 21 | -0.0019567 | 0.0009389 | -0.0045467 | 0.0006334  |
| Middle | Audience indegree/total indegree | 22 | -0.0033307 | 0.0008046 | -0.0055502 | -0.0011111 |
| Middle | Audience indegree/total indegree | 23 | -0.0035786 | 0.0005372 | -0.0050605 | -0.0020967 |
| Middle | Audience indegree/total indegree | 24 | -0.0005224 | 0.0013817 | -0.0043340 | 0.0032892  |
| Middle | Audience indegree/total indegree | 25 | -0.0033385 | 0.0008442 | -0.0056673 | -0.0010097 |
| Middle | Audience indegree/total indegree | 26 | -0.0032836 | 0.0008495 | -0.0056272 | -0.0009400 |
| Middle | Audience indegree/total indegree | 27 | -0.0038692 | 0.0009540 | -0.0065010 | -0.0012374 |
| Middle | Audience indegree/total indegree | 28 | -0.0021885 | 0.0010662 | -0.0051297 | 0.0007527  |
| Middle | Audience indegree/total indegree | 29 | -0.0017809 | 0.0006639 | -0.0036125 | 0.0000506  |
| Middle | Audience indegree/total indegree | 30 | -0.0039078 | 0.0023346 | -0.0103482 | 0.0025326  |
| Middle | Audience indegree/total indegree | 31 | -0.0069966 | 0.0353223 | -0.1044380 | 0.0904449  |
| Middle | Audience indegree/total indegree | 32 | -0.0007210 | 0.0353223 | -0.0981624 | 0.0967205  |
| Middle | Audience indegree/total indegree | 33 | 0.0004966  | 0.0353223 | -0.0969448 | 0.0979381  |
| Middle | Audience indegree/total indegree | 34 | -0.0030240 | 0.0164655 | -0.0484464 | 0.0423983  |
| Middle | Audience indegree/total indegree | 35 | -0.0016980 | 0.0158217 | -0.0453444 | 0.0419483  |
| Middle | Audience indegree/total indegree | 36 | -0.0035166 | 0.0242301 | -0.0703588 | 0.0633256  |
| Middle | Audience indegree/total indegree | 37 | -0.0042173 | 0.0198072 | -0.0588583 | 0.0504238  |
| Middle | Audience indegree/total indegree | 38 | -0.0028350 | 0.0237901 | -0.0684633 | 0.0627933  |
| Middle | Audience indegree/total indegree | 39 | -0.0009809 | 0.0198264 | -0.0556749 | 0.0537130  |
| Middle | Audience indegree/total indegree | 40 | -0.0016246 | 0.0239968 | -0.0678231 | 0.0645739  |
| Middle | Audience indegree/total indegree | 41 | -0.0002086 | 0.0198725 | -0.0550297 | 0.0546124  |
| Middle | Audience indegree/total indegree | 42 | -0.0010067 | 0.0342591 | -0.0955153 | 0.0935020  |
| Middle | Audience indegree/total indegree | 43 | -0.0035151 | 0.1397588 | -0.3890596 | 0.3820295  |
| Middle | Audience indegree/total indegree | 44 | 0.0063806  | 0.1397588 | -0.3791639 | 0.3919252  |
| Middle | Audience indegree/total indegree | 45 | -0.0036130 | 0.1397588 | -0.3891575 | 0.3819316  |
| Middle | Audience indegree/total indegree | 47 | 0.0005478  | NA        | NA         | NA         |
| Middle | Audience indegree/total indegree | 48 | -0.0040072 | NA        | NA         | NA         |
| Middle | Audience indegree/total indegree | 49 | -0.0026699 | NA        | NA         | NA         |
| Middle | Audience indegree/total indegree | 50 | -0.0031979 | NA        | NA         | NA         |
| Middle | Audience indegree/total indegree | 51 | -0.0005040 | 0.0353223 | -0.0979454 | 0.0969375  |
| Middle | Audience indegree/total indegree | 52 | -0.0007546 | 0.0291532 | -0.0811779 | 0.0796687  |

|        |                                  |    |            |           |            |           |
|--------|----------------------------------|----|------------|-----------|------------|-----------|
| Middle | Audience indegree/total indegree | 53 | -0.0025443 | 0.0423452 | -0.1193595 | 0.1142709 |
| Middle | Audience indegree/total indegree | 54 | -0.0037885 | 0.0271418 | -0.0786631 | 0.0710861 |
| Middle | Audience indegree/total indegree | 55 | 0.0004900  | 0.0418357 | -0.1149195 | 0.1158996 |
| Middle | Audience indegree/total indegree | 56 | 0.0008654  | 0.1729021 | -0.4761095 | 0.4778404 |
| Middle | Audience indegree/total indegree | 57 | -0.0029501 | 0.1397588 | -0.3884946 | 0.3825945 |
| Middle | Audience indegree/total indegree | 58 | -0.0012839 | 0.1397588 | -0.3868284 | 0.3842607 |
| Middle | Audience indegree/total indegree | 59 | -0.0080084 | 0.1397588 | -0.3935529 | 0.3775362 |

| sample | outcome                          | event.time | estimate   | std.error | conf.low   | conf.high |
|--------|----------------------------------|------------|------------|-----------|------------|-----------|
| Least  | Audience indegree/total indegree | -44        | -0.0011566 | 0.0010468 | -0.0037901 | 0.0014770 |
| Least  | Audience indegree/total indegree | -43        | -0.0019388 | 0.0012538 | -0.0050931 | 0.0012155 |
| Least  | Audience indegree/total indegree | -42        | 0.0015877  | 0.0005392 | 0.0002311  | 0.0029442 |
| Least  | Audience indegree/total indegree | -41        | 0.0007869  | 0.0041678 | -0.0096982 | 0.0112720 |
| Least  | Audience indegree/total indegree | -40        | 0.0004398  | 0.0044957 | -0.0108703 | 0.0117499 |
| Least  | Audience indegree/total indegree | -39        | -0.0006002 | 0.0039001 | -0.0104119 | 0.0092115 |
| Least  | Audience indegree/total indegree | -38        | 0.0004566  | 0.0032841 | -0.0078055 | 0.0087186 |
| Least  | Audience indegree/total indegree | -37        | 0.0020656  | 0.0019784 | -0.0029116 | 0.0070428 |
| Least  | Audience indegree/total indegree | -36        | -0.0005630 | 0.0010758 | -0.0032695 | 0.0021435 |
| Least  | Audience indegree/total indegree | -35        | 0.0023448  | 0.0018373 | -0.0022775 | 0.0069671 |
| Least  | Audience indegree/total indegree | -34        | -0.0050367 | 0.0020433 | -0.0101771 | 0.0001038 |
| Least  | Audience indegree/total indegree | -33        | 0.0057315  | 0.0015951 | 0.0017186  | 0.0097444 |
| Least  | Audience indegree/total indegree | -32        | -0.0020211 | 0.0026402 | -0.0086632 | 0.0046209 |
| Least  | Audience indegree/total indegree | -31        | -0.0018150 | 0.0025877 | -0.0083249 | 0.0046949 |
| Least  | Audience indegree/total indegree | -30        | 0.0026692  | 0.0011615 | -0.0002528 | 0.0055912 |
| Least  | Audience indegree/total indegree | -29        | 0.0011082  | 0.0008626 | -0.0010619 | 0.0032783 |
| Least  | Audience indegree/total indegree | -28        | -0.0005116 | 0.0005530 | -0.0019028 | 0.0008796 |
| Least  | Audience indegree/total indegree | -27        | -0.0000219 | 0.0016950 | -0.0042863 | 0.0042424 |
| Least  | Audience indegree/total indegree | -26        | 0.0030953  | 0.0019817 | -0.0018903 | 0.0080809 |
| Least  | Audience indegree/total indegree | -25        | -0.0025500 | 0.0017511 | -0.0069553 | 0.0018554 |
| Least  | Audience indegree/total indegree | -24        | 0.0037881  | 0.0016351 | -0.0003253 | 0.0079016 |
| Least  | Audience indegree/total indegree | -23        | -0.0024018 | 0.0013857 | -0.0058879 | 0.0010843 |
| Least  | Audience indegree/total indegree | -22        | 0.0018842  | 0.0008024 | -0.0001344 | 0.0039027 |
| Least  | Audience indegree/total indegree | -21        | 0.0002647  | 0.0008529 | -0.0018810 | 0.0024104 |
| Least  | Audience indegree/total indegree | -20        | -0.0023451 | 0.0012255 | -0.0054280 | 0.0007379 |
| Least  | Audience indegree/total indegree | -19        | 0.0000248  | 0.0012279 | -0.0030644 | 0.0031140 |
| Least  | Audience indegree/total indegree | -18        | 0.0014758  | 0.0015108 | -0.0023249 | 0.0052765 |
| Least  | Audience indegree/total indegree | -17        | 0.0003730  | 0.0007379 | -0.0014833 | 0.0022294 |
| Least  | Audience indegree/total indegree | -16        | 0.0002164  | 0.0008183 | -0.0018423 | 0.0022750 |
| Least  | Audience indegree/total indegree | -15        | -0.0006539 | 0.0006696 | -0.0023385 | 0.0010307 |
| Least  | Audience indegree/total indegree | -14        | -0.0003147 | 0.0010775 | -0.0030254 | 0.0023960 |
| Least  | Audience indegree/total indegree | -13        | -0.0000835 | 0.0011072 | -0.0028689 | 0.0027019 |

|       |                                  |     |            |           |            |            |
|-------|----------------------------------|-----|------------|-----------|------------|------------|
| Least | Audience indegree/total indegree | -12 | -0.0019496 | 0.0017468 | -0.0063443 | 0.0024450  |
| Least | Audience indegree/total indegree | -11 | -0.0009458 | 0.0020209 | -0.0060299 | 0.0041383  |
| Least | Audience indegree/total indegree | -10 | -0.0015832 | 0.0006992 | -0.0033424 | 0.0001759  |
| Least | Audience indegree/total indegree | -9  | 0.0017145  | 0.0008486 | -0.0004203 | 0.0038494  |
| Least | Audience indegree/total indegree | -8  | -0.0005295 | 0.0017278 | -0.0048763 | 0.0038173  |
| Least | Audience indegree/total indegree | -7  | -0.0002609 | 0.0014719 | -0.0039638 | 0.0034420  |
| Least | Audience indegree/total indegree | -6  | 0.0008728  | 0.0014079 | -0.0026692 | 0.0044148  |
| Least | Audience indegree/total indegree | -5  | 0.0005000  | 0.0008169 | -0.0015553 | 0.0025552  |
| Least | Audience indegree/total indegree | -4  | -0.0013584 | 0.0013325 | -0.0047107 | 0.0019939  |
| Least | Audience indegree/total indegree | -3  | 0.0002654  | 0.0016730 | -0.0039434 | 0.0044743  |
| Least | Audience indegree/total indegree | -2  | -0.0012973 | 0.0011897 | -0.0042904 | 0.0016957  |
| Least | Audience indegree/total indegree | -1  | 0.0009231  | 0.0008408 | -0.0011921 | 0.0030383  |
| Least | Audience indegree/total indegree | 0   | -0.0017446 | 0.0018482 | -0.0063941 | 0.0029049  |
| Least | Audience indegree/total indegree | 1   | -0.0047395 | 0.0011243 | -0.0075679 | -0.0019111 |
| Least | Audience indegree/total indegree | 2   | -0.0022860 | 0.0007955 | -0.0042872 | -0.0002849 |
| Least | Audience indegree/total indegree | 3   | -0.0013159 | 0.0018750 | -0.0060329 | 0.0034010  |
| Least | Audience indegree/total indegree | 4   | -0.0027148 | 0.0013673 | -0.0061547 | 0.0007251  |
| Least | Audience indegree/total indegree | 5   | -0.0024885 | 0.0013856 | -0.0059743 | 0.0009972  |
| Least | Audience indegree/total indegree | 6   | -0.0036080 | 0.0017472 | -0.0080036 | 0.0007875  |
| Least | Audience indegree/total indegree | 7   | -0.0031553 | 0.0015584 | -0.0070758 | 0.0007652  |
| Least | Audience indegree/total indegree | 8   | -0.0016742 | 0.0014755 | -0.0053863 | 0.0020378  |
| Least | Audience indegree/total indegree | 9   | -0.0017059 | 0.0009480 | -0.0040910 | 0.0006791  |
| Least | Audience indegree/total indegree | 10  | -0.0041438 | 0.0014922 | -0.0078977 | -0.0003898 |
| Least | Audience indegree/total indegree | 11  | -0.0046119 | 0.0011999 | -0.0076306 | -0.0015932 |
| Least | Audience indegree/total indegree | 12  | -0.0033143 | 0.0017398 | -0.0076914 | 0.0010627  |
| Least | Audience indegree/total indegree | 13  | -0.0053250 | 0.0015408 | -0.0092013 | -0.0014486 |
| Least | Audience indegree/total indegree | 14  | -0.0063621 | 0.0014213 | -0.0099377 | -0.0027865 |
| Least | Audience indegree/total indegree | 15  | -0.0040476 | 0.0014803 | -0.0077717 | -0.0003236 |
| Least | Audience indegree/total indegree | 16  | -0.0036253 | 0.0017625 | -0.0080592 | 0.0008087  |
| Least | Audience indegree/total indegree | 17  | -0.0046392 | 0.0035404 | -0.0135459 | 0.0042676  |
| Least | Audience indegree/total indegree | 18  | -0.0046997 | 0.0031339 | -0.0125838 | 0.0031844  |
| Least | Audience indegree/total indegree | 19  | -0.0049547 | 0.0017703 | -0.0094085 | -0.0005010 |
| Least | Audience indegree/total indegree | 20  | -0.0056484 | 0.0013335 | -0.0090032 | -0.0022937 |
| Least | Audience indegree/total indegree | 21  | -0.0042846 | 0.0014803 | -0.0080086 | -0.0005606 |
| Least | Audience indegree/total indegree | 22  | -0.0046960 | 0.0016167 | -0.0087633 | -0.0006287 |
| Least | Audience indegree/total indegree | 23  | -0.0058223 | 0.0013202 | -0.0091436 | -0.0025009 |
| Least | Audience indegree/total indegree | 24  | -0.0060591 | 0.0012584 | -0.0092250 | -0.0028932 |
| Least | Audience indegree/total indegree | 25  | -0.0059505 | 0.0017457 | -0.0103423 | -0.0015587 |
| Least | Audience indegree/total indegree | 26  | -0.0054278 | 0.0015287 | -0.0092736 | -0.0015820 |
| Least | Audience indegree/total indegree | 27  | -0.0035793 | 0.0011867 | -0.0065648 | -0.0005937 |
| Least | Audience indegree/total indegree | 28  | -0.0043973 | 0.0018046 | -0.0089374 | 0.0001427  |



|       |                                  |    |            |           |            |           |
|-------|----------------------------------|----|------------|-----------|------------|-----------|
| Least | Audience indegree/total indegree | 29 | -0.0051735 | 0.0049469 | -0.0176188 | 0.0072718 |
| Least | Audience indegree/total indegree | 30 | -0.0076071 | 0.0040337 | -0.0177550 | 0.0025408 |
| Least | Audience indegree/total indegree | 31 | -0.0027514 | 0.0314941 | -0.0819832 | 0.0764804 |
| Least | Audience indegree/total indegree | 32 | -0.0020459 | 0.0314941 | -0.0812776 | 0.0771859 |
| Least | Audience indegree/total indegree | 33 | -0.0027474 | 0.0314941 | -0.0819792 | 0.0764844 |
| Least | Audience indegree/total indegree | 34 | -0.0024899 | 0.0181630 | -0.0481839 | 0.0432040 |
| Least | Audience indegree/total indegree | 35 | -0.0033947 | 0.0154889 | -0.0423611 | 0.0355716 |
| Least | Audience indegree/total indegree | 36 | -0.0047698 | 0.0179123 | -0.0498330 | 0.0402934 |
| Least | Audience indegree/total indegree | 37 | -0.0029727 | 0.0172637 | -0.0464042 | 0.0404588 |
| Least | Audience indegree/total indegree | 38 | -0.0029640 | 0.0183220 | -0.0490580 | 0.0431300 |
| Least | Audience indegree/total indegree | 39 | -0.0033684 | 0.0146613 | -0.0402528 | 0.0335159 |
| Least | Audience indegree/total indegree | 40 | -0.0048197 | 0.0187026 | -0.0518711 | 0.0422316 |
| Least | Audience indegree/total indegree | 41 | -0.0040336 | 0.0180954 | -0.0495575 | 0.0414903 |
| Least | Audience indegree/total indegree | 42 | -0.0049238 | 0.0326802 | -0.0871397 | 0.0772920 |
| Least | Audience indegree/total indegree | 43 | -0.0065813 | 0.1455977 | -0.3728710 | 0.3597084 |
| Least | Audience indegree/total indegree | 44 | -0.0043627 | 0.1757386 | -0.4464798 | 0.4377544 |
| Least | Audience indegree/total indegree | 45 | -0.0047155 | 0.1088214 | -0.2784847 | 0.2690538 |
| Least | Audience indegree/total indegree | 47 | -0.0047242 | NA        | NA         | NA        |
| Least | Audience indegree/total indegree | 48 | -0.0048113 | NA        | NA         | NA        |
| Least | Audience indegree/total indegree | 49 | -0.0049808 | NA        | NA         | NA        |
| Least | Audience indegree/total indegree | 50 | -0.0050477 | NA        | NA         | NA        |
| Least | Audience indegree/total indegree | 51 | -0.0057900 | 0.0314941 | -0.0850217 | 0.0734418 |
| Least | Audience indegree/total indegree | 52 | -0.0051554 | 0.0231779 | -0.0634656 | 0.0531549 |
| Least | Audience indegree/total indegree | 53 | -0.0068950 | 0.0313731 | -0.0858224 | 0.0720325 |
| Least | Audience indegree/total indegree | 54 | -0.0052996 | 0.0320080 | -0.0858243 | 0.0752251 |
| Least | Audience indegree/total indegree | 55 | -0.0073507 | 0.0379216 | -0.1027525 | 0.0880511 |
| Least | Audience indegree/total indegree | 56 | -0.0070654 | 0.1455977 | -0.3733550 | 0.3592243 |
| Least | Audience indegree/total indegree | 57 | -0.0068726 | 0.1455977 | -0.3731623 | 0.3594171 |
| Least | Audience indegree/total indegree | 58 | -0.0085735 | 0.1455977 | -0.3748632 | 0.3577162 |
| Least | Audience indegree/total indegree | 59 | -0.0065929 | 0.1845631 | -0.4709104 | 0.4577246 |

## Hateful non-audience outdegree

Average effect by length of exposure (Callaway and Sant'Anna)

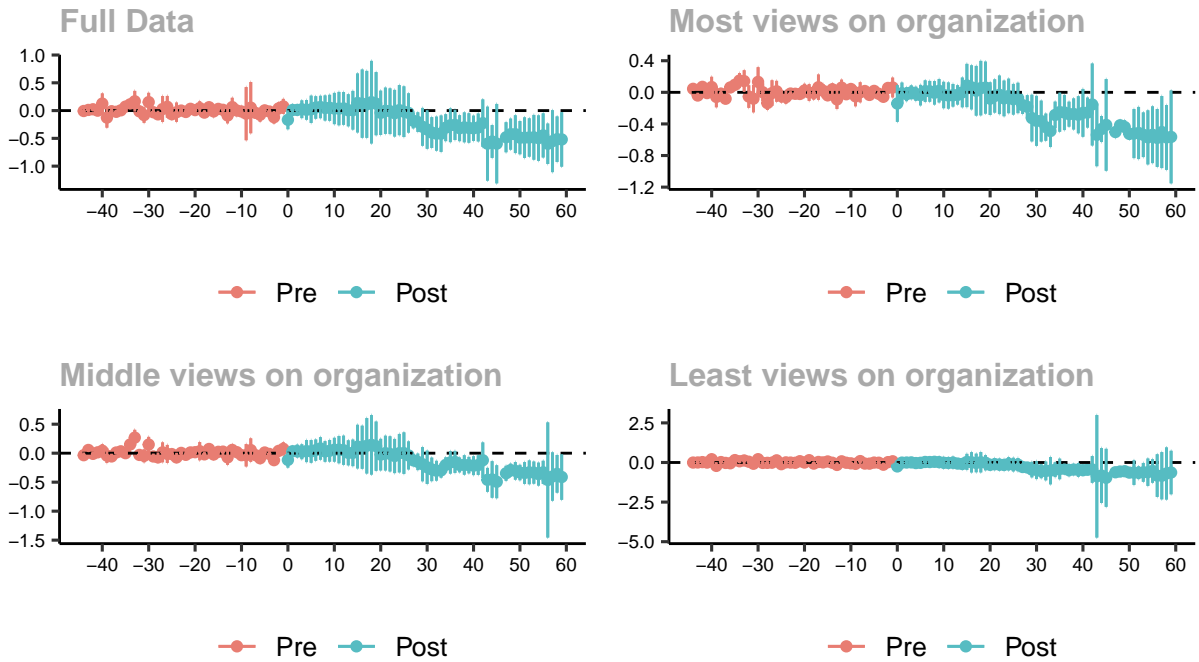

Long timeframe with sampled control groups

| sample | outcome                        | event.time | estimate   | std.error | conf.low   | conf.high  |
|--------|--------------------------------|------------|------------|-----------|------------|------------|
| Full   | Hateful non-audience outdegree | -44        | -0.0074997 | 0.0092556 | -0.0321180 | 0.0171186  |
| Full   | Hateful non-audience outdegree | -43        | 0.0117591  | 0.0138476 | -0.0250729 | 0.0485911  |
| Full   | Hateful non-audience outdegree | -42        | 0.0234647  | 0.0128138 | -0.0106176 | 0.0575470  |
| Full   | Hateful non-audience outdegree | -41        | -0.0013943 | 0.0149748 | -0.0412245 | 0.0384360  |
| Full   | Hateful non-audience outdegree | -40        | 0.1257035  | 0.0687443 | -0.0571436 | 0.3085507  |
| Full   | Hateful non-audience outdegree | -39        | -0.1264571 | 0.0679175 | -0.3071053 | 0.0541910  |
| Full   | Hateful non-audience outdegree | -38        | -0.0115399 | 0.0154599 | -0.0526605 | 0.0295807  |
| Full   | Hateful non-audience outdegree | -37        | -0.0219639 | 0.0119140 | -0.0536530 | 0.0097252  |
| Full   | Hateful non-audience outdegree | -36        | 0.0047796  | 0.0181834 | -0.0435849 | 0.0531441  |
| Full   | Hateful non-audience outdegree | -35        | 0.0716713  | 0.0202255 | 0.0178752  | 0.1254674  |
| Full   | Hateful non-audience outdegree | -34        | 0.1125919  | 0.0352736 | 0.0187706  | 0.2064132  |
| Full   | Hateful non-audience outdegree | -33        | 0.1676575  | 0.0702067 | -0.0190793 | 0.3543943  |
| Full   | Hateful non-audience outdegree | -32        | -0.0136568 | 0.0379178 | -0.1145111 | 0.0871974  |
| Full   | Hateful non-audience outdegree | -31        | -0.0810827 | 0.0519842 | -0.2193511 | 0.0571857  |
| Full   | Hateful non-audience outdegree | -30        | 0.1524454  | 0.0627831 | -0.0145461 | 0.3194369  |
| Full   | Hateful non-audience outdegree | -29        | -0.0297301 | 0.0230063 | -0.0909226 | 0.0314624  |
| Full   | Hateful non-audience outdegree | -28        | -0.0682782 | 0.0251207 | -0.1350947 | -0.0014618 |
| Full   | Hateful non-audience outdegree | -27        | 0.0284753  | 0.0878423 | -0.2051689 | 0.2621195  |
| Full   | Hateful non-audience outdegree | -26        | 0.0681954  | 0.0732530 | -0.1266441 | 0.2630349  |

|      |                                |     |            |           |            |            |
|------|--------------------------------|-----|------------|-----------|------------|------------|
| Full | Hateful non-audience outdegree | -25 | -0.0659563 | 0.0354992 | -0.1603775 | 0.0284650  |
| Full | Hateful non-audience outdegree | -24 | -0.0290637 | 0.0649252 | -0.2017526 | 0.1436253  |
| Full | Hateful non-audience outdegree | -23 | 0.0005943  | 0.0162660 | -0.0426702 | 0.0438588  |
| Full | Hateful non-audience outdegree | -22 | -0.0251616 | 0.0217600 | -0.0830391 | 0.0327159  |
| Full | Hateful non-audience outdegree | -21 | 0.0316543  | 0.0205707 | -0.0230601 | 0.0863687  |
| Full | Hateful non-audience outdegree | -20 | 0.0087402  | 0.0248739 | -0.0574197 | 0.0749000  |
| Full | Hateful non-audience outdegree | -19 | 0.0452574  | 0.0459112 | -0.0768578 | 0.1673726  |
| Full | Hateful non-audience outdegree | -18 | -0.0365075 | 0.0162454 | -0.0797174 | 0.0067023  |
| Full | Hateful non-audience outdegree | -17 | 0.0605720  | 0.0328689 | -0.0268533 | 0.1479973  |
| Full | Hateful non-audience outdegree | -16 | -0.0145084 | 0.0386222 | -0.1172364 | 0.0882196  |
| Full | Hateful non-audience outdegree | -15 | 0.0301041  | 0.0253868 | -0.0374200 | 0.0976282  |
| Full | Hateful non-audience outdegree | -14 | 0.0141445  | 0.0286236 | -0.0619890 | 0.0902781  |
| Full | Hateful non-audience outdegree | -13 | -0.0882011 | 0.0529774 | -0.2291113 | 0.0527090  |
| Full | Hateful non-audience outdegree | -12 | 0.0630389  | 0.0627410 | -0.1038406 | 0.2299184  |
| Full | Hateful non-audience outdegree | -11 | 0.0012091  | 0.0380819 | -0.1000818 | 0.1025000  |
| Full | Hateful non-audience outdegree | -10 | -0.0164536 | 0.0366290 | -0.1138800 | 0.0809729  |
| Full | Hateful non-audience outdegree | -9  | -0.0557382 | 0.1795923 | -0.5334207 | 0.4219443  |
| Full | Hateful non-audience outdegree | -8  | 0.0531483  | 0.1732119 | -0.4075634 | 0.5138601  |
| Full | Hateful non-audience outdegree | -7  | -0.0401718 | 0.0305715 | -0.1214863 | 0.0411427  |
| Full | Hateful non-audience outdegree | -6  | -0.0756305 | 0.0464856 | -0.1992735 | 0.0480125  |
| Full | Hateful non-audience outdegree | -5  | 0.0040862  | 0.0286491 | -0.0721152 | 0.0802875  |
| Full | Hateful non-audience outdegree | -4  | -0.0169293 | 0.0205099 | -0.0714819 | 0.0376234  |
| Full | Hateful non-audience outdegree | -3  | -0.1196934 | 0.0422076 | -0.2319579 | -0.0074288 |
| Full | Hateful non-audience outdegree | -2  | 0.0394984  | 0.0405116 | -0.0682549 | 0.1472518  |
| Full | Hateful non-audience outdegree | -1  | 0.0755239  | 0.0507121 | -0.0593610 | 0.2104088  |
| Full | Hateful non-audience outdegree | 0   | -0.1653384 | 0.0639846 | -0.3355256 | 0.0048487  |
| Full | Hateful non-audience outdegree | 1   | 0.0111115  | 0.0375455 | -0.0887526 | 0.1109756  |
| Full | Hateful non-audience outdegree | 2   | 0.0116489  | 0.0327966 | -0.0755839 | 0.0988817  |
| Full | Hateful non-audience outdegree | 3   | 0.0237736  | 0.0598510 | -0.1354190 | 0.1829661  |
| Full | Hateful non-audience outdegree | 4   | 0.0132410  | 0.0665191 | -0.1636876 | 0.1901697  |
| Full | Hateful non-audience outdegree | 5   | 0.0225739  | 0.0923791 | -0.2231375 | 0.2682854  |
| Full | Hateful non-audience outdegree | 6   | 0.0557041  | 0.0757668 | -0.1458216 | 0.2572299  |
| Full | Hateful non-audience outdegree | 7   | 0.0643391  | 0.0756390 | -0.1368468 | 0.2655249  |
| Full | Hateful non-audience outdegree | 8   | 0.0467387  | 0.0847740 | -0.1787445 | 0.2722219  |
| Full | Hateful non-audience outdegree | 9   | 0.0501350  | 0.0878797 | -0.1836089 | 0.2838789  |
| Full | Hateful non-audience outdegree | 10  | 0.0368251  | 0.1056256 | -0.2441196 | 0.3177697  |
| Full | Hateful non-audience outdegree | 11  | 0.0357110  | 0.1127223 | -0.2641096 | 0.3355317  |
| Full | Hateful non-audience outdegree | 12  | 0.0394285  | 0.1106675 | -0.2549267 | 0.3337838  |
| Full | Hateful non-audience outdegree | 13  | 0.0054554  | 0.1084326 | -0.2829555 | 0.2938662  |
| Full | Hateful non-audience outdegree | 14  | 0.0062084  | 0.1307360 | -0.3415253 | 0.3539422  |
| Full | Hateful non-audience outdegree | 15  | 0.1374180  | 0.1993028 | -0.3926906 | 0.6675266  |

|      |                                |    |            |           |            |            |
|------|--------------------------------|----|------------|-----------|------------|------------|
| Full | Hateful non-audience outdegree | 16 | 0.1250800  | 0.2308032 | -0.4888140 | 0.7389740  |
| Full | Hateful non-audience outdegree | 17 | 0.1118301  | 0.2263472 | -0.4902116 | 0.7138719  |
| Full | Hateful non-audience outdegree | 18 | 0.1516580  | 0.2792599 | -0.5911218 | 0.8944379  |
| Full | Hateful non-audience outdegree | 19 | 0.1244204  | 0.2135128 | -0.4434844 | 0.6923251  |
| Full | Hateful non-audience outdegree | 20 | -0.0405198 | 0.1499898 | -0.4394650 | 0.3584253  |
| Full | Hateful non-audience outdegree | 21 | -0.0029239 | 0.1563809 | -0.4188682 | 0.4130204  |
| Full | Hateful non-audience outdegree | 22 | -0.0115737 | 0.1545309 | -0.4225974 | 0.3994499  |
| Full | Hateful non-audience outdegree | 23 | -0.0472170 | 0.1576690 | -0.4665875 | 0.3721535  |
| Full | Hateful non-audience outdegree | 24 | 0.0081661  | 0.1692863 | -0.4421043 | 0.4584365  |
| Full | Hateful non-audience outdegree | 25 | -0.0198341 | 0.1714592 | -0.4758839 | 0.4362158  |
| Full | Hateful non-audience outdegree | 26 | -0.0426998 | 0.1327391 | -0.3957613 | 0.3103617  |
| Full | Hateful non-audience outdegree | 27 | -0.1825020 | 0.0517068 | -0.3200326 | -0.0449715 |
| Full | Hateful non-audience outdegree | 28 | -0.2069990 | 0.0661194 | -0.3828644 | -0.0311335 |
| Full | Hateful non-audience outdegree | 29 | -0.2919561 | 0.1276948 | -0.6316007 | 0.0476886  |
| Full | Hateful non-audience outdegree | 30 | -0.3395595 | 0.1306805 | -0.6871456 | 0.0080266  |
| Full | Hateful non-audience outdegree | 31 | -0.3954700 | 0.1040125 | -0.6721241 | -0.1188159 |
| Full | Hateful non-audience outdegree | 32 | -0.4148502 | 0.1149369 | -0.7205612 | -0.1091392 |
| Full | Hateful non-audience outdegree | 33 | -0.4157136 | 0.1230842 | -0.7430950 | -0.0883323 |
| Full | Hateful non-audience outdegree | 34 | -0.3078289 | 0.0908632 | -0.5495082 | -0.0661495 |
| Full | Hateful non-audience outdegree | 35 | -0.2643952 | 0.1141359 | -0.5679755 | 0.0391852  |
| Full | Hateful non-audience outdegree | 36 | -0.2570465 | 0.1025408 | -0.5297862 | 0.0156932  |
| Full | Hateful non-audience outdegree | 37 | -0.3171333 | 0.0875937 | -0.5501163 | -0.0841503 |
| Full | Hateful non-audience outdegree | 38 | -0.3017268 | 0.1009050 | -0.5701157 | -0.0333380 |
| Full | Hateful non-audience outdegree | 39 | -0.3132248 | 0.0995326 | -0.5779632 | -0.0484864 |
| Full | Hateful non-audience outdegree | 40 | -0.3191493 | 0.0853520 | -0.5461699 | -0.0921287 |
| Full | Hateful non-audience outdegree | 41 | -0.3039282 | 0.0941805 | -0.5544309 | -0.0534255 |
| Full | Hateful non-audience outdegree | 42 | -0.2259941 | 0.1605619 | -0.6530591 | 0.2010709  |
| Full | Hateful non-audience outdegree | 43 | -0.5950471 | 0.2499706 | -1.2599228 | 0.0698285  |
| Full | Hateful non-audience outdegree | 44 | -0.5561160 | 0.1108705 | -0.8510111 | -0.2612208 |
| Full | Hateful non-audience outdegree | 45 | -0.5946890 | 0.2684453 | -1.3087041 | 0.1193261  |
| Full | Hateful non-audience outdegree | 47 | -0.4799257 | 0.1015231 | -0.7499584 | -0.2098930 |
| Full | Hateful non-audience outdegree | 48 | -0.4237596 | 0.1046760 | -0.7021784 | -0.1453408 |
| Full | Hateful non-audience outdegree | 49 | -0.4247607 | 0.1277057 | -0.7644342 | -0.0850871 |
| Full | Hateful non-audience outdegree | 50 | -0.4872277 | 0.1122526 | -0.7857989 | -0.1886564 |
| Full | Hateful non-audience outdegree | 51 | -0.4870978 | 0.1372084 | -0.8520469 | -0.1221486 |
| Full | Hateful non-audience outdegree | 52 | -0.4844955 | 0.1296063 | -0.8292245 | -0.1397665 |
| Full | Hateful non-audience outdegree | 53 | -0.4811047 | 0.1514023 | -0.8838070 | -0.0784024 |
| Full | Hateful non-audience outdegree | 54 | -0.4958582 | 0.1535991 | -0.9044035 | -0.0873129 |
| Full | Hateful non-audience outdegree | 55 | -0.4464968 | 0.1491555 | -0.8432231 | -0.0497706 |
| Full | Hateful non-audience outdegree | 56 | -0.5967919 | 0.1366818 | -0.9603404 | -0.2332434 |
| Full | Hateful non-audience outdegree | 57 | -0.5505257 | 0.2093625 | -1.1073914 | 0.0063399  |

|      |                                |    |            |           |            |            |
|------|--------------------------------|----|------------|-----------|------------|------------|
| Full | Hateful non-audience outdegree | 58 | -0.5147238 | 0.1538038 | -0.9238135 | -0.1056341 |
| Full | Hateful non-audience outdegree | 59 | -0.5190841 | 0.1838836 | -1.0081806 | -0.0299875 |

| sample | outcome                        | event.time | estimate   | std.error | conf.low   | conf.high  |
|--------|--------------------------------|------------|------------|-----------|------------|------------|
| Most   | Hateful non-audience outdegree | -44        | 0.0444311  | 0.0087116 | 0.0216073  | 0.0672550  |
| Most   | Hateful non-audience outdegree | -43        | -0.0404117 | 0.0136585 | -0.0761962 | -0.0046272 |
| Most   | Hateful non-audience outdegree | -42        | 0.0695978  | 0.0131015 | 0.0352726  | 0.1039230  |
| Most   | Hateful non-audience outdegree | -41        | -0.0096461 | 0.0201759 | -0.0625059 | 0.0432137  |
| Most   | Hateful non-audience outdegree | -40        | 0.0668319  | 0.0495698 | -0.0630387 | 0.1967025  |
| Most   | Hateful non-audience outdegree | -39        | -0.0581586 | 0.0500005 | -0.1891574 | 0.0728402  |
| Most   | Hateful non-audience outdegree | -38        | -0.0165354 | 0.0232843 | -0.0775391 | 0.0444682  |
| Most   | Hateful non-audience outdegree | -37        | -0.0811242 | 0.0113288 | -0.1108052 | -0.0514433 |
| Most   | Hateful non-audience outdegree | -36        | 0.0612354  | 0.0107919 | 0.0329612  | 0.0895096  |
| Most   | Hateful non-audience outdegree | -35        | 0.0953114  | 0.0267870 | 0.0251308  | 0.1654920  |
| Most   | Hateful non-audience outdegree | -34        | 0.1493356  | 0.0364683 | 0.0537903  | 0.2448808  |
| Most   | Hateful non-audience outdegree | -33        | 0.1421871  | 0.0523375 | 0.0050654  | 0.2793089  |
| Most   | Hateful non-audience outdegree | -32        | -0.0534450 | 0.0542874 | -0.1956754 | 0.0887855  |
| Most   | Hateful non-audience outdegree | -31        | -0.0799866 | 0.0659664 | -0.2528153 | 0.0928421  |
| Most   | Hateful non-audience outdegree | -30        | 0.1322872  | 0.0707658 | -0.0531158 | 0.3176902  |
| Most   | Hateful non-audience outdegree | -29        | 0.0011551  | 0.0430318 | -0.1115861 | 0.1138963  |
| Most   | Hateful non-audience outdegree | -28        | -0.1359426 | 0.0331005 | -0.2226644 | -0.0492209 |
| Most   | Hateful non-audience outdegree | -27        | -0.0094427 | 0.0616874 | -0.1710606 | 0.1521753  |
| Most   | Hateful non-audience outdegree | -26        | 0.0132616  | 0.0503984 | -0.1187798 | 0.1453030  |
| Most   | Hateful non-audience outdegree | -25        | -0.0490356 | 0.0301711 | -0.1280825 | 0.0300113  |
| Most   | Hateful non-audience outdegree | -24        | -0.0613755 | 0.0316404 | -0.1442718 | 0.0215208  |
| Most   | Hateful non-audience outdegree | -23        | -0.0153434 | 0.0112337 | -0.0447752 | 0.0140885  |
| Most   | Hateful non-audience outdegree | -22        | -0.0182090 | 0.0186007 | -0.0669420 | 0.0305240  |
| Most   | Hateful non-audience outdegree | -21        | -0.0207507 | 0.0094040 | -0.0453888 | 0.0038874  |
| Most   | Hateful non-audience outdegree | -20        | 0.0232394  | 0.0324428 | -0.0617591 | 0.1082379  |
| Most   | Hateful non-audience outdegree | -19        | -0.0021423 | 0.0404436 | -0.1081026 | 0.1038180  |
| Most   | Hateful non-audience outdegree | -18        | -0.0074119 | 0.0322990 | -0.0920336 | 0.0772098  |
| Most   | Hateful non-audience outdegree | -17        | 0.0645960  | 0.0613151 | -0.0960467 | 0.2252387  |
| Most   | Hateful non-audience outdegree | -16        | 0.0200074  | 0.0325563 | -0.0652885 | 0.1053033  |
| Most   | Hateful non-audience outdegree | -15        | -0.0384177 | 0.0215623 | -0.0949099 | 0.0180746  |
| Most   | Hateful non-audience outdegree | -14        | 0.0383264  | 0.0278601 | -0.0346658 | 0.1113186  |
| Most   | Hateful non-audience outdegree | -13        | -0.0895222 | 0.0460252 | -0.2101061 | 0.0310616  |
| Most   | Hateful non-audience outdegree | -12        | 0.0592695  | 0.0384791 | -0.0415438 | 0.1600828  |
| Most   | Hateful non-audience outdegree | -11        | -0.0245030 | 0.0168181 | -0.0685655 | 0.0195596  |
| Most   | Hateful non-audience outdegree | -10        | 0.0421781  | 0.0226721 | -0.0172217 | 0.1015779  |
| Most   | Hateful non-audience outdegree | -9         | -0.0513440 | 0.0476692 | -0.1762350 | 0.0735469  |
| Most   | Hateful non-audience outdegree | -8         | -0.0000972 | 0.0484502 | -0.1270344 | 0.1268400  |

|      |                                |    |            |           |            |            |
|------|--------------------------------|----|------------|-----------|------------|------------|
| Most | Hateful non-audience outdegree | -7 | 0.0167141  | 0.0165675 | -0.0266918 | 0.0601201  |
| Most | Hateful non-audience outdegree | -6 | -0.0329427 | 0.0193421 | -0.0836180 | 0.0177326  |
| Most | Hateful non-audience outdegree | -5 | 0.0182682  | 0.0199891 | -0.0341022 | 0.0706386  |
| Most | Hateful non-audience outdegree | -4 | -0.0182112 | 0.0271768 | -0.0894130 | 0.0529907  |
| Most | Hateful non-audience outdegree | -3 | -0.0563671 | 0.0220241 | -0.1140691 | 0.0013350  |
| Most | Hateful non-audience outdegree | -2 | 0.0557280  | 0.0194398 | 0.0047966  | 0.1066593  |
| Most | Hateful non-audience outdegree | -1 | 0.0611799  | 0.0476916 | -0.0637697 | 0.1861295  |
| Most | Hateful non-audience outdegree | 0  | -0.1416550 | 0.0881302 | -0.3725520 | 0.0892420  |
| Most | Hateful non-audience outdegree | 1  | -0.0106152 | 0.0512915 | -0.1449963 | 0.1237660  |
| Most | Hateful non-audience outdegree | 2  | -0.0234151 | 0.0336462 | -0.1115666 | 0.0647364  |
| Most | Hateful non-audience outdegree | 3  | 0.0000102  | 0.0334791 | -0.0877034 | 0.0877238  |
| Most | Hateful non-audience outdegree | 4  | -0.0182849 | 0.0342331 | -0.1079741 | 0.0714043  |
| Most | Hateful non-audience outdegree | 5  | -0.0354442 | 0.0494388 | -0.1649716 | 0.0940832  |
| Most | Hateful non-audience outdegree | 6  | 0.0152134  | 0.0519377 | -0.1208610 | 0.1512877  |
| Most | Hateful non-audience outdegree | 7  | 0.0130310  | 0.0501278 | -0.1183014 | 0.1443633  |
| Most | Hateful non-audience outdegree | 8  | -0.0060021 | 0.0566236 | -0.1543532 | 0.1423490  |
| Most | Hateful non-audience outdegree | 9  | 0.0198575  | 0.0562916 | -0.1276237 | 0.1673388  |
| Most | Hateful non-audience outdegree | 10 | -0.0337236 | 0.0637155 | -0.2006551 | 0.1332078  |
| Most | Hateful non-audience outdegree | 11 | -0.0403079 | 0.0630038 | -0.2053747 | 0.1247590  |
| Most | Hateful non-audience outdegree | 12 | -0.0373337 | 0.0545476 | -0.1802458 | 0.1055783  |
| Most | Hateful non-audience outdegree | 13 | -0.0323679 | 0.0465293 | -0.1542723 | 0.0895365  |
| Most | Hateful non-audience outdegree | 14 | -0.0011531 | 0.0717030 | -0.1890116 | 0.1867054  |
| Most | Hateful non-audience outdegree | 15 | 0.0864936  | 0.1044350 | -0.1871210 | 0.3601083  |
| Most | Hateful non-audience outdegree | 16 | 0.0631507  | 0.1063162 | -0.2153927 | 0.3416940  |
| Most | Hateful non-audience outdegree | 17 | 0.0200520  | 0.1199415 | -0.2941891 | 0.3342931  |
| Most | Hateful non-audience outdegree | 18 | 0.0534831  | 0.1315695 | -0.2912225 | 0.3981887  |
| Most | Hateful non-audience outdegree | 19 | 0.0600715  | 0.1254121 | -0.2685023 | 0.3886452  |
| Most | Hateful non-audience outdegree | 20 | -0.0801678 | 0.0789685 | -0.2870615 | 0.1267258  |
| Most | Hateful non-audience outdegree | 21 | -0.0460106 | 0.0802615 | -0.2562918 | 0.1642705  |
| Most | Hateful non-audience outdegree | 22 | -0.0315964 | 0.0930548 | -0.2753954 | 0.2122026  |
| Most | Hateful non-audience outdegree | 23 | -0.0771098 | 0.0861519 | -0.3028237 | 0.1486040  |
| Most | Hateful non-audience outdegree | 24 | -0.0456636 | 0.0833655 | -0.2640772 | 0.1727501  |
| Most | Hateful non-audience outdegree | 25 | -0.0874750 | 0.0740145 | -0.2813895 | 0.1064395  |
| Most | Hateful non-audience outdegree | 26 | -0.0710889 | 0.0734623 | -0.2635567 | 0.1213788  |
| Most | Hateful non-audience outdegree | 27 | -0.1619010 | 0.0427158 | -0.2738143 | -0.0499876 |
| Most | Hateful non-audience outdegree | 28 | -0.1825971 | 0.0558597 | -0.3289468 | -0.0362473 |
| Most | Hateful non-audience outdegree | 29 | -0.3257447 | 0.1126191 | -0.6208011 | -0.0306882 |
| Most | Hateful non-audience outdegree | 30 | -0.3605445 | 0.1205376 | -0.6763471 | -0.0447419 |
| Most | Hateful non-audience outdegree | 31 | -0.3639269 | 0.0987360 | -0.6226105 | -0.1052432 |
| Most | Hateful non-audience outdegree | 32 | -0.4408788 | 0.0654855 | -0.6124476 | -0.2693101 |
| Most | Hateful non-audience outdegree | 33 | -0.4901230 | 0.0771479 | -0.6922468 | -0.2879991 |

|      |                                |    |            |           |            |            |
|------|--------------------------------|----|------------|-----------|------------|------------|
| Most | Hateful non-audience outdegree | 34 | -0.2862967 | 0.0643298 | -0.4548376 | -0.1177559 |
| Most | Hateful non-audience outdegree | 35 | -0.2499873 | 0.0947391 | -0.4981991 | -0.0017754 |
| Most | Hateful non-audience outdegree | 36 | -0.2553643 | 0.0848204 | -0.4775897 | -0.0331390 |
| Most | Hateful non-audience outdegree | 37 | -0.2763487 | 0.0602308 | -0.4341506 | -0.1185468 |
| Most | Hateful non-audience outdegree | 38 | -0.2737947 | 0.0748800 | -0.4699767 | -0.0776128 |
| Most | Hateful non-audience outdegree | 39 | -0.2839181 | 0.0893858 | -0.5181046 | -0.0497317 |
| Most | Hateful non-audience outdegree | 40 | -0.2596946 | 0.1153991 | -0.5620346 | 0.0426454  |
| Most | Hateful non-audience outdegree | 41 | -0.2560822 | 0.0723137 | -0.4455404 | -0.0666239 |
| Most | Hateful non-audience outdegree | 42 | -0.1540320 | 0.1978863 | -0.6724844 | 0.3644204  |
| Most | Hateful non-audience outdegree | 43 | -0.5387359 | 0.1512920 | -0.9351136 | -0.1423582 |
| Most | Hateful non-audience outdegree | 44 | -0.4644782 | 0.0627440 | -0.6288646 | -0.3000918 |
| Most | Hateful non-audience outdegree | 45 | -0.4121667 | 0.2212801 | -0.9919100 | 0.1675766  |
| Most | Hateful non-audience outdegree | 47 | -0.5023863 | 0.0283660 | -0.5767038 | -0.4280687 |
| Most | Hateful non-audience outdegree | 48 | -0.4169847 | 0.0244915 | -0.4811513 | -0.3528181 |
| Most | Hateful non-audience outdegree | 49 | -0.4394691 | 0.0326470 | -0.5250027 | -0.3539355 |
| Most | Hateful non-audience outdegree | 50 | -0.5260900 | 0.0263850 | -0.5952174 | -0.4569626 |
| Most | Hateful non-audience outdegree | 51 | -0.5221810 | 0.1184530 | -0.8325222 | -0.2118398 |
| Most | Hateful non-audience outdegree | 52 | -0.5147461 | 0.1259429 | -0.8447103 | -0.1847819 |
| Most | Hateful non-audience outdegree | 53 | -0.5372249 | 0.1077627 | -0.8195580 | -0.2548919 |
| Most | Hateful non-audience outdegree | 54 | -0.5700278 | 0.1305320 | -0.9120152 | -0.2280403 |
| Most | Hateful non-audience outdegree | 55 | -0.5367898 | 0.1370378 | -0.8958223 | -0.1777573 |
| Most | Hateful non-audience outdegree | 56 | -0.5775463 | 0.1396916 | -0.9435316 | -0.2115609 |
| Most | Hateful non-audience outdegree | 57 | -0.5028651 | 0.1740322 | -0.9588209 | -0.0469093 |
| Most | Hateful non-audience outdegree | 58 | -0.5710696 | 0.1565182 | -0.9811396 | -0.1609996 |
| Most | Hateful non-audience outdegree | 59 | -0.5645681 | 0.2240916 | -1.1516772 | 0.0225410  |

| sample | outcome                        | event.time | estimate   | std.error | conf.low   | conf.high  |
|--------|--------------------------------|------------|------------|-----------|------------|------------|
| Middle | Hateful non-audience outdegree | -44        | -0.0346325 | 0.0178632 | -0.0822352 | 0.0129703  |
| Middle | Hateful non-audience outdegree | -43        | 0.0557311  | 0.0117847 | 0.0243265  | 0.0871357  |
| Middle | Hateful non-audience outdegree | -42        | -0.0113699 | 0.0154085 | -0.0524313 | 0.0296915  |
| Middle | Hateful non-audience outdegree | -41        | 0.0145374  | 0.0152635 | -0.0261376 | 0.0552124  |
| Middle | Hateful non-audience outdegree | -40        | 0.0431985  | 0.0419181 | -0.0685074 | 0.1549043  |
| Middle | Hateful non-audience outdegree | -39        | -0.0417885 | 0.0469229 | -0.1668313 | 0.0832543  |
| Middle | Hateful non-audience outdegree | -38        | -0.0562663 | 0.0179473 | -0.1040933 | -0.0084394 |
| Middle | Hateful non-audience outdegree | -37        | 0.0119801  | 0.0118066 | -0.0194828 | 0.0434430  |
| Middle | Hateful non-audience outdegree | -36        | 0.0323831  | 0.0110663 | 0.0028930  | 0.0618732  |
| Middle | Hateful non-audience outdegree | -35        | 0.0003453  | 0.0215424 | -0.0570622 | 0.0577528  |
| Middle | Hateful non-audience outdegree | -34        | 0.1498872  | 0.0225997 | 0.0896623  | 0.2101121  |
| Middle | Hateful non-audience outdegree | -33        | 0.2686365  | 0.0504862 | 0.1340981  | 0.4031750  |
| Middle | Hateful non-audience outdegree | -32        | -0.0301725 | 0.0280676 | -0.1049687 | 0.0446237  |
| Middle | Hateful non-audience outdegree | -31        | -0.0465039 | 0.0414533 | -0.1569711 | 0.0639632  |

|        |                                |     |            |           |            |            |
|--------|--------------------------------|-----|------------|-----------|------------|------------|
| Middle | Hateful non-audience outdegree | -30 | 0.1490711  | 0.0495355 | 0.0170661  | 0.2810760  |
| Middle | Hateful non-audience outdegree | -29 | -0.0565530 | 0.0188213 | -0.1067090 | -0.0063970 |
| Middle | Hateful non-audience outdegree | -28 | -0.0727639 | 0.0320337 | -0.1581291 | 0.0126012  |
| Middle | Hateful non-audience outdegree | -27 | 0.0148815  | 0.0640740 | -0.1558666 | 0.1856296  |
| Middle | Hateful non-audience outdegree | -26 | -0.0126619 | 0.0581093 | -0.1675149 | 0.1421910  |
| Middle | Hateful non-audience outdegree | -25 | -0.0163453 | 0.0316833 | -0.1007767 | 0.0680861  |
| Middle | Hateful non-audience outdegree | -24 | -0.0731884 | 0.0301326 | -0.1534876 | 0.0071108  |
| Middle | Hateful non-audience outdegree | -23 | 0.0051799  | 0.0199524 | -0.0479904 | 0.0583503  |
| Middle | Hateful non-audience outdegree | -22 | -0.0281259 | 0.0192936 | -0.0795405 | 0.0232887  |
| Middle | Hateful non-audience outdegree | -21 | 0.0133554  | 0.0131752 | -0.0217546 | 0.0484654  |
| Middle | Hateful non-audience outdegree | -20 | 0.0169057  | 0.0134978 | -0.0190639 | 0.0528753  |
| Middle | Hateful non-audience outdegree | -19 | 0.0345951  | 0.0587682 | -0.1220137 | 0.1912040  |
| Middle | Hateful non-audience outdegree | -18 | -0.0201198 | 0.0143639 | -0.0583976 | 0.0181579  |
| Middle | Hateful non-audience outdegree | -17 | 0.0726881  | 0.0251538 | 0.0056567  | 0.1397194  |
| Middle | Hateful non-audience outdegree | -16 | -0.0226722 | 0.0313954 | -0.1063364 | 0.0609919  |
| Middle | Hateful non-audience outdegree | -15 | 0.0240682  | 0.0218163 | -0.0340693 | 0.0822056  |
| Middle | Hateful non-audience outdegree | -14 | 0.0271964  | 0.0243221 | -0.0376185 | 0.0920114  |
| Middle | Hateful non-audience outdegree | -13 | -0.0723791 | 0.0478757 | -0.1999609 | 0.0552027  |
| Middle | Hateful non-audience outdegree | -12 | 0.0560091  | 0.0367329 | -0.0418789 | 0.1538970  |
| Middle | Hateful non-audience outdegree | -11 | 0.0175966  | 0.0197985 | -0.0351634 | 0.0703567  |
| Middle | Hateful non-audience outdegree | -10 | -0.0346789 | 0.0280465 | -0.1094189 | 0.0400610  |
| Middle | Hateful non-audience outdegree | -9  | -0.0359793 | 0.0723094 | -0.2286736 | 0.1567150  |
| Middle | Hateful non-audience outdegree | -8  | 0.0535472  | 0.0755920 | -0.1478946 | 0.2549890  |
| Middle | Hateful non-audience outdegree | -7  | -0.0326697 | 0.0186792 | -0.0824471 | 0.0171078  |
| Middle | Hateful non-audience outdegree | -6  | -0.0872188 | 0.0339690 | -0.1777413 | 0.0033038  |
| Middle | Hateful non-audience outdegree | -5  | 0.0120130  | 0.0207947 | -0.0434018 | 0.0674277  |
| Middle | Hateful non-audience outdegree | -4  | -0.0128467 | 0.0179390 | -0.0606516 | 0.0349581  |
| Middle | Hateful non-audience outdegree | -3  | -0.1202765 | 0.0295845 | -0.1991151 | -0.0414379 |
| Middle | Hateful non-audience outdegree | -2  | 0.0396843  | 0.0245170 | -0.0256499 | 0.1050185  |
| Middle | Hateful non-audience outdegree | -1  | 0.0759404  | 0.0417477 | -0.0353113 | 0.1871920  |
| Middle | Hateful non-audience outdegree | 0   | -0.1162170 | 0.0493927 | -0.2478414 | 0.0154074  |
| Middle | Hateful non-audience outdegree | 1   | 0.0333378  | 0.0320725 | -0.0521308 | 0.1188063  |
| Middle | Hateful non-audience outdegree | 2   | 0.0365373  | 0.0416177 | -0.0743679 | 0.1474425  |
| Middle | Hateful non-audience outdegree | 3   | 0.0245061  | 0.0481115 | -0.1037042 | 0.1527165  |
| Middle | Hateful non-audience outdegree | 4   | 0.0368749  | 0.0713706 | -0.1533176 | 0.2270674  |
| Middle | Hateful non-audience outdegree | 5   | 0.0306859  | 0.0732691 | -0.1645656 | 0.2259375  |
| Middle | Hateful non-audience outdegree | 6   | 0.0527507  | 0.0687348 | -0.1304177 | 0.2359191  |
| Middle | Hateful non-audience outdegree | 7   | 0.0821385  | 0.0728328 | -0.1119506 | 0.2762275  |
| Middle | Hateful non-audience outdegree | 8   | 0.0296433  | 0.0665389 | -0.1476732 | 0.2069599  |
| Middle | Hateful non-audience outdegree | 9   | 0.0416835  | 0.0699314 | -0.1446738 | 0.2280407  |
| Middle | Hateful non-audience outdegree | 10  | 0.0599714  | 0.0769219 | -0.1450143 | 0.2649571  |



|        |                                |    |            |           |            |            |
|--------|--------------------------------|----|------------|-----------|------------|------------|
| Middle | Hateful non-audience outdegree | 11 | 0.0615278  | 0.0882018 | -0.1735173 | 0.2965730  |
| Middle | Hateful non-audience outdegree | 12 | 0.0506894  | 0.0942413 | -0.2004501 | 0.3018289  |
| Middle | Hateful non-audience outdegree | 13 | 0.0061377  | 0.0808308 | -0.2092649 | 0.2215402  |
| Middle | Hateful non-audience outdegree | 14 | 0.0053911  | 0.0858871 | -0.2234856 | 0.2342678  |
| Middle | Hateful non-audience outdegree | 15 | 0.1135051  | 0.1411031 | -0.2625145 | 0.4895247  |
| Middle | Hateful non-audience outdegree | 16 | 0.1027172  | 0.1392611 | -0.2683936 | 0.4738281  |
| Middle | Hateful non-audience outdegree | 17 | 0.1278406  | 0.1793343 | -0.3500597 | 0.6057409  |
| Middle | Hateful non-audience outdegree | 18 | 0.1445679  | 0.1924635 | -0.3683199 | 0.6574557  |
| Middle | Hateful non-audience outdegree | 19 | 0.1207334  | 0.1592573 | -0.3036646 | 0.5451313  |
| Middle | Hateful non-audience outdegree | 20 | -0.0243387 | 0.1021305 | -0.2965020 | 0.2478245  |
| Middle | Hateful non-audience outdegree | 21 | 0.0018419  | 0.1123106 | -0.2974499 | 0.3011336  |
| Middle | Hateful non-audience outdegree | 22 | -0.0118946 | 0.1137657 | -0.3150639 | 0.2912748  |
| Middle | Hateful non-audience outdegree | 23 | -0.0489660 | 0.1105596 | -0.3435914 | 0.2456595  |
| Middle | Hateful non-audience outdegree | 24 | 0.0005594  | 0.1243938 | -0.3309322 | 0.3320511  |
| Middle | Hateful non-audience outdegree | 25 | 0.0014919  | 0.1341442 | -0.3559831 | 0.3589670  |
| Middle | Hateful non-audience outdegree | 26 | -0.0385584 | 0.0904154 | -0.2795024 | 0.2023856  |
| Middle | Hateful non-audience outdegree | 27 | -0.1228527 | 0.0373100 | -0.2222785 | -0.0234268 |
| Middle | Hateful non-audience outdegree | 28 | -0.1494205 | 0.0534784 | -0.2919327 | -0.0069083 |
| Middle | Hateful non-audience outdegree | 29 | -0.1897427 | 0.1104241 | -0.4840072 | 0.1045219  |
| Middle | Hateful non-audience outdegree | 30 | -0.2431881 | 0.1075815 | -0.5298775 | 0.0435013  |
| Middle | Hateful non-audience outdegree | 31 | -0.2793021 | 0.0761342 | -0.4821889 | -0.0764154 |
| Middle | Hateful non-audience outdegree | 32 | -0.3019902 | 0.0638793 | -0.4722194 | -0.1317609 |
| Middle | Hateful non-audience outdegree | 33 | -0.2964278 | 0.0467705 | -0.4210644 | -0.1717912 |
| Middle | Hateful non-audience outdegree | 34 | -0.2021583 | 0.0486167 | -0.3317149 | -0.0726017 |
| Middle | Hateful non-audience outdegree | 35 | -0.1585637 | 0.0722315 | -0.3510504 | 0.0339230  |
| Middle | Hateful non-audience outdegree | 36 | -0.1505361 | 0.0709968 | -0.3397323 | 0.0386601  |
| Middle | Hateful non-audience outdegree | 37 | -0.2030317 | 0.0476084 | -0.3299012 | -0.0761623 |
| Middle | Hateful non-audience outdegree | 38 | -0.2026901 | 0.0627009 | -0.3697789 | -0.0356012 |
| Middle | Hateful non-audience outdegree | 39 | -0.2058297 | 0.0531720 | -0.3475255 | -0.0641338 |
| Middle | Hateful non-audience outdegree | 40 | -0.2159038 | 0.0608306 | -0.3780085 | -0.0537990 |
| Middle | Hateful non-audience outdegree | 41 | -0.2054176 | 0.0629751 | -0.3732372 | -0.0375980 |
| Middle | Hateful non-audience outdegree | 42 | -0.1218763 | 0.1151343 | -0.4286928 | 0.1849402  |
| Middle | Hateful non-audience outdegree | 43 | -0.4591996 | 0.0770999 | -0.6646599 | -0.2537394 |
| Middle | Hateful non-audience outdegree | 44 | -0.4531408 | 0.1180857 | -0.7678223 | -0.1384592 |
| Middle | Hateful non-audience outdegree | 45 | -0.4927007 | 0.1065028 | -0.7765156 | -0.2088859 |
| Middle | Hateful non-audience outdegree | 47 | -0.3462727 | 0.0482467 | -0.4748433 | -0.2177022 |
| Middle | Hateful non-audience outdegree | 48 | -0.2914883 | 0.0413600 | -0.4017067 | -0.1812700 |
| Middle | Hateful non-audience outdegree | 49 | -0.3040336 | 0.0568843 | -0.4556222 | -0.1524450 |
| Middle | Hateful non-audience outdegree | 50 | -0.3334814 | 0.0500010 | -0.4667269 | -0.2002358 |
| Middle | Hateful non-audience outdegree | 51 | -0.3414430 | 0.0701139 | -0.5282864 | -0.1545996 |
| Middle | Hateful non-audience outdegree | 52 | -0.3305604 | 0.0768528 | -0.5353622 | -0.1257587 |

|        |                                |    |            |           |            |            |
|--------|--------------------------------|----|------------|-----------|------------|------------|
| Middle | Hateful non-audience outdegree | 53 | -0.3347334 | 0.0714811 | -0.5252204 | -0.1442465 |
| Middle | Hateful non-audience outdegree | 54 | -0.3607013 | 0.0739917 | -0.5578786 | -0.1635239 |
| Middle | Hateful non-audience outdegree | 55 | -0.3299589 | 0.0746236 | -0.5288202 | -0.1310977 |
| Middle | Hateful non-audience outdegree | 56 | -0.4618894 | 0.3724332 | -1.4543705 | 0.5305918  |
| Middle | Hateful non-audience outdegree | 57 | -0.4022469 | 0.1562039 | -0.8185080 | 0.0140142  |
| Middle | Hateful non-audience outdegree | 58 | -0.3559488 | 0.1219155 | -0.6808362 | -0.0310614 |
| Middle | Hateful non-audience outdegree | 59 | -0.4107590 | 0.1471461 | -0.8028822 | -0.0186358 |

| sample | outcome                        | event.time | estimate   | std.error | conf.low   | conf.high |
|--------|--------------------------------|------------|------------|-----------|------------|-----------|
| Least  | Hateful non-audience outdegree | -44        | -0.0029147 | 0.0231034 | -0.0645796 | 0.0587502 |
| Least  | Hateful non-audience outdegree | -43        | 0.0019581  | 0.0322317 | -0.0840711 | 0.0879873 |
| Least  | Hateful non-audience outdegree | -42        | 0.0242323  | 0.0315006 | -0.0598455 | 0.1083102 |
| Least  | Hateful non-audience outdegree | -41        | -0.0054250 | 0.0337094 | -0.0953983 | 0.0845482 |
| Least  | Hateful non-audience outdegree | -40        | 0.2076275  | 0.1033817 | -0.0683074 | 0.4835623 |
| Least  | Hateful non-audience outdegree | -39        | -0.2141011 | 0.0907386 | -0.4562903 | 0.0280881 |
| Least  | Hateful non-audience outdegree | -38        | 0.0262287  | 0.0372514 | -0.0731985 | 0.1256560 |
| Least  | Hateful non-audience outdegree | -37        | -0.0278252 | 0.0224342 | -0.0877039 | 0.0320535 |
| Least  | Hateful non-audience outdegree | -36        | -0.0498485 | 0.0607370 | -0.2119607 | 0.1122637 |
| Least  | Hateful non-audience outdegree | -35        | 0.1513434  | 0.0264535 | 0.0807368  | 0.2219500 |
| Least  | Hateful non-audience outdegree | -34        | 0.0770391  | 0.0403008 | -0.0305271 | 0.1846053 |
| Least  | Hateful non-audience outdegree | -33        | 0.1282132  | 0.1029352 | -0.1465296 | 0.4029561 |
| Least  | Hateful non-audience outdegree | -32        | 0.0486310  | 0.0686165 | -0.1345123 | 0.2317743 |
| Least  | Hateful non-audience outdegree | -31        | -0.0802874 | 0.0488513 | -0.2106758 | 0.0501010 |
| Least  | Hateful non-audience outdegree | -30        | 0.2076964  | 0.0995994 | -0.0581431 | 0.4735359 |
| Least  | Hateful non-audience outdegree | -29        | -0.0257546 | 0.0286077 | -0.1021110 | 0.0506018 |
| Least  | Hateful non-audience outdegree | -28        | -0.0225637 | 0.0223510 | -0.0822205 | 0.0370931 |
| Least  | Hateful non-audience outdegree | -27        | -0.0098702 | 0.1170958 | -0.3224091 | 0.3026688 |
| Least  | Hateful non-audience outdegree | -26        | 0.1364081  | 0.0824037 | -0.0835345 | 0.3563506 |
| Least  | Hateful non-audience outdegree | -25        | -0.1070404 | 0.0568280 | -0.2587192 | 0.0446383 |
| Least  | Hateful non-audience outdegree | -24        | 0.0073306  | 0.0789228 | -0.2033212 | 0.2179824 |
| Least  | Hateful non-audience outdegree | -23        | -0.0059765 | 0.0179438 | -0.0538700 | 0.0419170 |
| Least  | Hateful non-audience outdegree | -22        | -0.0180903 | 0.0503833 | -0.1525677 | 0.1163870 |
| Least  | Hateful non-audience outdegree | -21        | 0.0828375  | 0.0297157 | 0.0035237  | 0.1621513 |
| Least  | Hateful non-audience outdegree | -20        | -0.0027761 | 0.0489537 | -0.1334377 | 0.1278856 |
| Least  | Hateful non-audience outdegree | -19        | 0.1458317  | 0.0380173 | 0.0443603  | 0.2473031 |
| Least  | Hateful non-audience outdegree | -18        | -0.0696643 | 0.0431131 | -0.1847368 | 0.0454082 |
| Least  | Hateful non-audience outdegree | -17        | 0.0337284  | 0.0433032 | -0.0818515 | 0.1493083 |
| Least  | Hateful non-audience outdegree | -16        | 0.0067814  | 0.0400547 | -0.1001280 | 0.1136908 |
| Least  | Hateful non-audience outdegree | -15        | 0.0646859  | 0.0427744 | -0.0494828 | 0.1788546 |
| Least  | Hateful non-audience outdegree | -14        | -0.0153528 | 0.0290832 | -0.0929784 | 0.0622728 |
| Least  | Hateful non-audience outdegree | -13        | -0.1529964 | 0.0654955 | -0.3278096 | 0.0218168 |

|       |                                |     |            |           |            |            |
|-------|--------------------------------|-----|------------|-----------|------------|------------|
| Least | Hateful non-audience outdegree | -12 | 0.0736121  | 0.0722969 | -0.1193546 | 0.2665789  |
| Least | Hateful non-audience outdegree | -11 | -0.0153779 | 0.0272058 | -0.0879925 | 0.0572366  |
| Least | Hateful non-audience outdegree | -10 | -0.0519449 | 0.0343927 | -0.1437420 | 0.0398522  |
| Least | Hateful non-audience outdegree | -9  | -0.0860086 | 0.0781504 | -0.2945987 | 0.1225815  |
| Least | Hateful non-audience outdegree | -8  | 0.0888649  | 0.0712365 | -0.1012715 | 0.2790013  |
| Least | Hateful non-audience outdegree | -7  | -0.0679248 | 0.0369293 | -0.1664922 | 0.0306427  |
| Least | Hateful non-audience outdegree | -6  | -0.0720629 | 0.0478897 | -0.1998847 | 0.0557589  |
| Least | Hateful non-audience outdegree | -5  | -0.0060984 | 0.0320837 | -0.0917325 | 0.0795358  |
| Least | Hateful non-audience outdegree | -4  | -0.0144386 | 0.0243021 | -0.0793032 | 0.0504259  |
| Least | Hateful non-audience outdegree | -3  | -0.1405751 | 0.0461651 | -0.2637937 | -0.0173566 |
| Least | Hateful non-audience outdegree | -2  | 0.0232218  | 0.0372140 | -0.0761057 | 0.1225493  |
| Least | Hateful non-audience outdegree | -1  | 0.0764354  | 0.0401306 | -0.0306766 | 0.1835474  |
| Least | Hateful non-audience outdegree | 0   | -0.2476496 | 0.0847148 | -0.4737608 | -0.0215384 |
| Least | Hateful non-audience outdegree | 1   | -0.0063694 | 0.0422112 | -0.1190348 | 0.1062961  |
| Least | Hateful non-audience outdegree | 2   | -0.0024423 | 0.0398871 | -0.1089045 | 0.1040199  |
| Least | Hateful non-audience outdegree | 3   | 0.0065489  | 0.0736048 | -0.1899086 | 0.2030064  |
| Least | Hateful non-audience outdegree | 4   | -0.0352492 | 0.0772589 | -0.2414599 | 0.1709615  |
| Least | Hateful non-audience outdegree | 5   | -0.0207431 | 0.1004739 | -0.2889165 | 0.2474304  |
| Least | Hateful non-audience outdegree | 6   | 0.0339254  | 0.0812190 | -0.1828552 | 0.2507059  |
| Least | Hateful non-audience outdegree | 7   | 0.0285622  | 0.0870144 | -0.2036868 | 0.2608112  |
| Least | Hateful non-audience outdegree | 8   | 0.0442743  | 0.0916789 | -0.2004246 | 0.2889732  |
| Least | Hateful non-audience outdegree | 9   | 0.0238990  | 0.1277482 | -0.3170719 | 0.3648699  |
| Least | Hateful non-audience outdegree | 10  | -0.0158160 | 0.1331160 | -0.3711141 | 0.3394820  |
| Least | Hateful non-audience outdegree | 11  | -0.0308886 | 0.1267148 | -0.3691014 | 0.3073242  |
| Least | Hateful non-audience outdegree | 12  | -0.0062639 | 0.1381613 | -0.3750282 | 0.3625005  |
| Least | Hateful non-audience outdegree | 13  | -0.0677182 | 0.0960182 | -0.3239990 | 0.1885625  |
| Least | Hateful non-audience outdegree | 14  | -0.0946189 | 0.1233819 | -0.4239359 | 0.2346981  |
| Least | Hateful non-audience outdegree | 15  | 0.0383346  | 0.1897255 | -0.4680592 | 0.5447284  |
| Least | Hateful non-audience outdegree | 16  | 0.0122707  | 0.2392133 | -0.6262103 | 0.6507517  |
| Least | Hateful non-audience outdegree | 17  | -0.0300482 | 0.2193807 | -0.6155942 | 0.5554978  |
| Least | Hateful non-audience outdegree | 18  | 0.0159045  | 0.2400369 | -0.6247748 | 0.6565838  |
| Least | Hateful non-audience outdegree | 19  | -0.0140352 | 0.1792299 | -0.4924153 | 0.4643449  |
| Least | Hateful non-audience outdegree | 20  | -0.1489053 | 0.1240018 | -0.4798770 | 0.1820663  |
| Least | Hateful non-audience outdegree | 21  | -0.1058078 | 0.1400569 | -0.4796319 | 0.2680163  |
| Least | Hateful non-audience outdegree | 22  | -0.1328238 | 0.1377461 | -0.5004801 | 0.2348326  |
| Least | Hateful non-audience outdegree | 23  | -0.1517691 | 0.1382323 | -0.5207231 | 0.2171849  |
| Least | Hateful non-audience outdegree | 24  | -0.0839426 | 0.1567556 | -0.5023370 | 0.3344518  |
| Least | Hateful non-audience outdegree | 25  | -0.1317763 | 0.1613447 | -0.5624193 | 0.2988668  |
| Least | Hateful non-audience outdegree | 26  | -0.1346313 | 0.1565098 | -0.5523696 | 0.2831070  |
| Least | Hateful non-audience outdegree | 27  | -0.2844632 | 0.0880382 | -0.5194447 | -0.0494816 |
| Least | Hateful non-audience outdegree | 28  | -0.3143072 | 0.0936053 | -0.5641478 | -0.0644667 |

|       |                                |    |            |           |            |            |
|-------|--------------------------------|----|------------|-----------|------------|------------|
| Least | Hateful non-audience outdegree | 29 | -0.4484972 | 0.1833130 | -0.9377754 | 0.0407809  |
| Least | Hateful non-audience outdegree | 30 | -0.4757423 | 0.2131320 | -1.0446102 | 0.0931256  |
| Least | Hateful non-audience outdegree | 31 | -0.5488040 | 0.1662187 | -0.9924561 | -0.1051518 |
| Least | Hateful non-audience outdegree | 32 | -0.5327188 | 0.2214435 | -1.1237707 | 0.0583332  |
| Least | Hateful non-audience outdegree | 33 | -0.5145576 | 0.3227580 | -1.3760265 | 0.3469113  |
| Least | Hateful non-audience outdegree | 34 | -0.4543215 | 0.1747795 | -0.9208231 | 0.0121801  |
| Least | Hateful non-audience outdegree | 35 | -0.4065484 | 0.2429505 | -1.0550044 | 0.2419076  |
| Least | Hateful non-audience outdegree | 36 | -0.3919405 | 0.1233723 | -0.7212317 | -0.0626493 |
| Least | Hateful non-audience outdegree | 37 | -0.4864917 | 0.1402733 | -0.8608932 | -0.1120903 |
| Least | Hateful non-audience outdegree | 38 | -0.4439644 | 0.1303658 | -0.7919219 | -0.0960069 |
| Least | Hateful non-audience outdegree | 39 | -0.4668402 | 0.1624868 | -0.9005316 | -0.0331488 |
| Least | Hateful non-audience outdegree | 40 | -0.4867697 | 0.1111198 | -0.7833580 | -0.1901814 |
| Least | Hateful non-audience outdegree | 41 | -0.4581993 | 0.0914628 | -0.7023214 | -0.2140772 |
| Least | Hateful non-audience outdegree | 42 | -0.4380644 | 0.3149870 | -1.2787920 | 0.4026631  |
| Least | Hateful non-audience outdegree | 43 | -0.8708919 | 1.4479657 | -4.7356377 | 2.9938540  |
| Least | Hateful non-audience outdegree | 44 | -0.8229087 | 0.6495535 | -2.5566234 | 0.9108059  |
| Least | Hateful non-audience outdegree | 45 | -0.9670791 | 0.6852011 | -2.7959401 | 0.8617819  |
| Least | Hateful non-audience outdegree | 47 | -0.6168713 | 0.0424499 | -0.7301737 | -0.5035689 |
| Least | Hateful non-audience outdegree | 48 | -0.5714794 | 0.0355230 | -0.6662933 | -0.4766656 |
| Least | Hateful non-audience outdegree | 49 | -0.5508072 | 0.0470851 | -0.6764813 | -0.4251331 |
| Least | Hateful non-audience outdegree | 50 | -0.6392872 | 0.0471173 | -0.7650474 | -0.5135271 |
| Least | Hateful non-audience outdegree | 51 | -0.6383981 | 0.2904137 | -1.4135374 | 0.1367413  |
| Least | Hateful non-audience outdegree | 52 | -0.6481434 | 0.1501065 | -1.0487905 | -0.2474963 |
| Least | Hateful non-audience outdegree | 53 | -0.6216999 | 0.2216342 | -1.2132608 | -0.0301389 |
| Least | Hateful non-audience outdegree | 54 | -0.6134177 | 0.3233128 | -1.4763677 | 0.2495322  |
| Least | Hateful non-audience outdegree | 55 | -0.5334071 | 0.2782489 | -1.2760774 | 0.2092632  |
| Least | Hateful non-audience outdegree | 56 | -0.8274929 | 0.5035870 | -2.1716103 | 0.5166245  |
| Least | Hateful non-audience outdegree | 57 | -0.8353434 | 0.5576970 | -2.3238849 | 0.6531980  |
| Least | Hateful non-audience outdegree | 58 | -0.6931418 | 0.6156324 | -2.3363181 | 0.9500345  |
| Least | Hateful non-audience outdegree | 59 | -0.6325110 | 0.5141476 | -2.0048154 | 0.7397935  |

## Tables of outcome variables aggregated at disruption and day level

| Disruption | Day | Views on hateful content | Views on hateful content/total views | Views on non-organization content that is hateful | Hateful comments by audience members | Hateful comments/total comments | Hateful audience outdegree | Hateful non-audience outdegree | Audience indegree | Audience outdegree | Audience indegree/total indegree | Audience outdegree/total outdegree |
|------------|-----|--------------------------|--------------------------------------|---------------------------------------------------|--------------------------------------|---------------------------------|----------------------------|--------------------------------|-------------------|--------------------|----------------------------------|------------------------------------|
| Cluster 4  | 0   | 2.65                     | 0.01                                 | 2.64                                              | 0.36                                 | 0.02                            | 0.04                       | 0.54                           | 1.12              | 1.08               | 0.06                             | 0.06                               |
| Cluster 4  | 1   | 2.63                     | 0.01                                 | 2.62                                              | 0.35                                 | 0.02                            | 0.04                       | 0.55                           | 1.12              | 1.12               | 0.06                             | 0.07                               |
| Cluster 4  | 2   | 2.75                     | 0.01                                 | 2.75                                              | 0.41                                 | 0.02                            | 0.04                       | 0.60                           | 1.16              | 1.12               | 0.06                             | 0.07                               |
| Cluster 4  | 3   | 2.73                     | 0.01                                 | 2.72                                              | 0.38                                 | 0.02                            | 0.04                       | 0.57                           | 1.11              | 1.04               | 0.05                             | 0.07                               |
| Cluster 4  | 4   | 2.61                     | 0.01                                 | 2.59                                              | 0.43                                 | 0.02                            | 0.05                       | 0.61                           | 1.16              | 1.05               | 0.06                             | 0.07                               |
| Cluster 4  | 5   | 2.62                     | 0.01                                 | 2.61                                              | 0.42                                 | 0.02                            | 0.05                       | 0.57                           | 1.12              | 1.10               | 0.06                             | 0.07                               |
| Cluster 4  | 6   | 2.75                     | 0.01                                 | 2.73                                              | 0.43                                 | 0.02                            | 0.05                       | 0.62                           | 1.14              | 1.10               | 0.06                             | 0.07                               |
| Cluster 4  | 7   | 2.59                     | 0.01                                 | 2.56                                              | 0.35                                 | 0.02                            | 0.04                       | 0.53                           | 1.16              | 1.04               | 0.06                             | 0.07                               |
| Cluster 4  | 8   | 2.60                     | 0.01                                 | 2.58                                              | 0.35                                 | 0.03                            | 0.03                       | 0.51                           | 1.16              | 1.05               | 0.05                             | 0.06                               |
| Cluster 4  | 9   | 2.71                     | 0.01                                 | 2.70                                              | 0.36                                 | 0.02                            | 0.05                       | 0.56                           | 1.15              | 1.10               | 0.06                             | 0.07                               |
| Cluster 4  | 10  | 3.29                     | 0.01                                 | 3.29                                              | 0.45                                 | 0.03                            | 0.05                       | 0.63                           | 1.15              | 1.03               | 0.06                             | 0.06                               |
| Cluster 4  | 11  | 4.01                     | 0.01                                 | 4.00                                              | 0.54                                 | 0.03                            | 0.06                       | 0.77                           | 1.10              | 1.05               | 0.06                             | 0.07                               |
| Cluster 4  | 12  | 5.23                     | 0.01                                 | 5.23                                              | 0.71                                 | 0.04                            | 0.09                       | 1.06                           | 1.20              | 1.13               | 0.06                             | 0.07                               |
| Cluster 4  | 13  | 6.03                     | 0.02                                 | 6.03                                              | 0.77                                 | 0.04                            | 0.09                       | 1.14                           | 1.23              | 1.14               | 0.06                             | 0.07                               |
| Cluster 4  | 14  | 7.20                     | 0.02                                 | 7.20                                              | 0.85                                 | 0.04                            | 0.10                       | 1.34                           | 1.20              | 1.21               | 0.05                             | 0.07                               |
| Cluster 4  | 15  | 9.42                     | 0.02                                 | 9.42                                              | 0.95                                 | 0.05                            | 0.12                       | 1.57                           | 1.23              | 1.23               | 0.06                             | 0.07                               |
| Cluster 4  | 16  | 9.15                     | 0.02                                 | 9.15                                              | 0.92                                 | 0.05                            | 0.12                       | 1.61                           | 1.22              | 1.20               | 0.06                             | 0.07                               |
| Cluster 4  | 17  | 8.59                     | 0.02                                 | 8.59                                              | 0.91                                 | 0.05                            | 0.10                       | 1.49                           | 1.35              | 1.22               | 0.05                             | 0.07                               |
| Cluster 4  | 18  | 6.78                     | 0.02                                 | 6.78                                              | 0.75                                 | 0.04                            | 0.09                       | 1.24                           | 1.41              | 1.21               | 0.06                             | 0.07                               |
| Cluster 4  | 19  | 5.81                     | 0.02                                 | 5.81                                              | 0.67                                 | 0.04                            | 0.09                       | 1.11                           | 1.20              | 1.13               | 0.06                             | 0.06                               |
| Cluster 4  | 20  | 5.40                     | 0.02                                 | 5.40                                              | 0.63                                 | 0.03                            | 0.08                       | 1.07                           | 1.12              | 1.09               | 0.05                             | 0.06                               |
| Cluster 4  | 21  | 4.96                     | 0.01                                 | 4.95                                              | 0.53                                 | 0.04                            | 0.07                       | 0.89                           | 1.11              | 1.09               | 0.06                             | 0.06                               |
| Cluster 4  | 22  | 4.86                     | 0.01                                 | 4.85                                              | 0.58                                 | 0.03                            | 0.07                       | 0.89                           | 1.03              | 1.04               | 0.05                             | 0.06                               |
| Cluster 4  | 23  | 4.84                     | 0.01                                 | 4.84                                              | 0.54                                 | 0.03                            | 0.07                       | 0.91                           | 1.02              | 1.07               | 0.05                             | 0.07                               |

|           |    |      |      |      |      |      |      |      |      |      |      |      |
|-----------|----|------|------|------|------|------|------|------|------|------|------|------|
| Cluster 4 | 24 | 4.64 | 0.01 | 4.64 | 0.46 | 0.03 | 0.06 | 0.83 | 1.01 | 1.02 | 0.06 | 0.07 |
| Cluster 4 | 25 | 4.53 | 0.01 | 4.53 | 0.52 | 0.03 | 0.07 | 0.86 | 1.07 | 0.99 | 0.05 | 0.06 |
| Cluster 4 | 26 | 4.71 | 0.01 | 4.71 | 0.55 | 0.03 | 0.07 | 0.90 | 1.04 | 1.03 | 0.05 | 0.06 |
| Cluster 4 | 27 | 4.61 | 0.01 | 4.61 | 0.54 | 0.03 | 0.07 | 0.87 | 1.11 | 1.02 | 0.06 | 0.07 |
| Cluster 4 | 28 | 3.99 | 0.01 | 3.99 | 0.46 | 0.03 | 0.06 | 0.78 | 1.06 | 0.92 | 0.05 | 0.06 |
| Cluster 4 | 29 | 4.08 | 0.01 | 4.08 | 0.50 | 0.03 | 0.05 | 0.80 | 0.92 | 0.95 | 0.05 | 0.06 |
| Cluster 4 | 30 | 3.99 | 0.01 | 3.99 | 0.51 | 0.03 | 0.05 | 0.76 | 0.99 | 0.93 | 0.05 | 0.06 |
| Cluster 4 | 31 | 3.96 | 0.01 | 3.96 | 0.52 | 0.03 | 0.04 | 0.80 | 1.01 | 0.91 | 0.05 | 0.06 |
| Cluster 4 | 32 | 4.32 | 0.01 | 4.32 | 0.53 | 0.03 | 0.05 | 0.86 | 0.93 | 0.88 | 0.05 | 0.06 |
| Cluster 4 | 33 | 4.17 | 0.01 | 4.17 | 0.54 | 0.03 | 0.05 | 0.85 | 0.87 | 0.85 | 0.05 | 0.06 |
| Cluster 4 | 34 | 4.11 | 0.01 | 4.11 | 0.51 | 0.03 | 0.05 | 0.81 | 0.92 | 0.90 | 0.05 | 0.06 |
| Cluster 4 | 35 | 3.85 | 0.01 | 3.85 | 0.46 | 0.03 | 0.04 | 0.74 | 0.89 | 0.88 | 0.05 | 0.06 |
| Cluster 4 | 36 | 3.30 | 0.01 | 3.30 | 0.41 | 0.03 | 0.04 | 0.68 | 1.10 | 1.05 | 0.05 | 0.06 |
| Cluster 4 | 37 | 3.81 | 0.01 | 3.81 | 0.48 | 0.03 | 0.04 | 0.74 | 0.88 | 0.84 | 0.05 | 0.06 |
| Cluster 4 | 38 | 4.07 | 0.01 | 4.07 | 0.54 | 0.03 | 0.05 | 0.81 | 0.92 | 0.88 | 0.05 | 0.06 |
| Cluster 4 | 39 | 3.82 | 0.01 | 3.82 | 0.50 | 0.03 | 0.05 | 0.83 | 0.95 | 0.89 | 0.05 | 0.06 |
| Cluster 4 | 40 | 3.89 | 0.01 | 3.89 | 0.50 | 0.03 | 0.05 | 0.80 | 0.97 | 0.88 | 0.05 | 0.06 |
| Cluster 4 | 41 | 3.70 | 0.01 | 3.70 | 0.46 | 0.03 | 0.04 | 0.71 | 0.85 | 0.84 | 0.05 | 0.06 |
| Cluster 4 | 42 | 3.63 | 0.01 | 3.63 | 0.45 | 0.03 | 0.04 | 0.74 | 0.87 | 0.84 | 0.05 | 0.06 |
| Cluster 4 | 43 | 3.60 | 0.01 | 3.60 | 0.47 | 0.03 | 0.04 | 0.72 | 0.85 | 0.83 | 0.05 | 0.05 |
| Cluster 4 | 44 | 4.03 | 0.01 | 4.03 | 0.58 | 0.03 | 0.05 | 0.84 | 0.88 | 0.85 | 0.05 | 0.06 |
| Cluster 4 | 45 | 3.76 | 0.01 | 3.76 | 0.52 | 0.03 | 0.05 | 0.81 | 0.90 | 0.85 | 0.05 | 0.06 |
| Cluster 4 | 46 | 3.52 | 0.01 | 3.52 | 0.47 | 0.03 | 0.04 | 0.78 | 0.87 | 0.86 | 0.05 | 0.05 |
| Cluster 4 | 47 | 3.55 | 0.01 | 3.55 | 0.48 | 0.03 | 0.05 | 0.71 | 0.85 | 0.82 | 0.05 | 0.05 |
| Cluster 4 | 48 | 3.29 | 0.01 | 3.29 | 0.41 | 0.03 | 0.04 | 0.66 | 0.90 | 0.83 | 0.05 | 0.06 |
| Cluster 4 | 49 | 3.29 | 0.01 | 3.29 | 0.41 | 0.03 | 0.05 | 0.69 | 1.00 | 0.93 | 0.05 | 0.06 |
| Cluster 4 | 50 | 3.61 | 0.01 | 3.61 | 0.47 | 0.03 | 0.04 | 0.72 | 0.78 | 0.81 | 0.05 | 0.05 |
| Cluster 4 | 51 | 3.85 | 0.01 | 3.85 | 0.50 | 0.03 | 0.04 | 0.78 | 0.90 | 0.80 | 0.05 | 0.06 |
| Cluster 4 | 52 | 3.77 | 0.01 | 3.77 | 0.50 | 0.03 | 0.05 | 0.76 | 0.98 | 0.85 | 0.05 | 0.06 |

|           |    |      |      |      |      |      |      |      |      |      |      |      |
|-----------|----|------|------|------|------|------|------|------|------|------|------|------|
| Cluster 4 | 53 | 3.51 | 0.01 | 3.51 | 0.49 | 0.03 | 0.04 | 0.72 | 0.88 | 0.84 | 0.05 | 0.06 |
| Cluster 4 | 54 | 3.28 | 0.01 | 3.28 | 0.46 | 0.03 | 0.04 | 0.73 | 0.80 | 0.82 | 0.05 | 0.06 |
| Cluster 4 | 55 | 3.20 | 0.01 | 3.20 | 0.48 | 0.03 | 0.03 | 0.72 | 0.86 | 0.82 | 0.05 | 0.06 |
| Cluster 4 | 56 | 3.02 | 0.01 | 3.02 | 0.37 | 0.02 | 0.03 | 0.66 | 0.89 | 0.80 | 0.05 | 0.06 |
| Cluster 4 | 57 | 3.09 | 0.01 | 3.09 | 0.39 | 0.03 | 0.04 | 0.65 | 0.81 | 0.80 | 0.05 | 0.06 |
| Cluster 4 | 58 | 3.29 | 0.01 | 3.29 | 0.46 | 0.03 | 0.04 | 0.74 | 0.95 | 0.81 | 0.05 | 0.05 |
| Cluster 4 | 59 | 3.35 | 0.01 | 3.35 | 0.49 | 0.03 | 0.03 | 0.71 | 0.83 | 0.80 | 0.05 | 0.06 |
| Cluster 4 | 65 | 2.36 | 0.01 | 2.36 | 0.43 | 0.03 | 0.03 | 0.58 | 0.90 | 0.80 | 0.05 | 0.06 |
| Cluster 4 | 66 | 3.08 | 0.01 | 3.08 | 0.47 | 0.03 | 0.04 | 0.70 | 0.83 | 0.83 | 0.04 | 0.06 |
| Cluster 4 | 67 | 3.25 | 0.01 | 3.25 | 0.46 | 0.03 | 0.04 | 0.70 | 0.90 | 0.81 | 0.05 | 0.05 |
| Cluster 4 | 68 | 2.32 | 0.01 | 2.32 | 0.46 | 0.03 | 0.03 | 0.61 | 0.80 | 0.81 | 0.05 | 0.05 |
| Cluster 4 | 69 | 2.80 | 0.01 | 2.80 | 0.49 | 0.03 | 0.03 | 0.69 | 0.90 | 0.81 | 0.05 | 0.05 |
| Cluster 4 | 70 | 2.93 | 0.01 | 2.93 | 0.47 | 0.03 | 0.04 | 0.68 | 0.84 | 0.75 | 0.04 | 0.06 |
| Cluster 4 | 71 | 3.02 | 0.01 | 3.02 | 0.41 | 0.03 | 0.04 | 0.66 | 0.80 | 0.84 | 0.05 | 0.05 |
| Cluster 4 | 72 | 3.15 | 0.01 | 3.15 | 0.43 | 0.03 | 0.04 | 0.64 | 0.89 | 0.78 | 0.05 | 0.05 |
| Cluster 4 | 73 | 3.21 | 0.01 | 3.21 | 0.43 | 0.03 | 0.04 | 0.62 | 0.80 | 0.79 | 0.05 | 0.05 |
| Cluster 1 | 0  | 3.45 | 0.01 | 3.42 | 0.41 | 0.02 | 0.09 | 0.72 | 1.74 | 1.68 | 0.06 | 0.08 |
| Cluster 1 | 1  | 3.46 | 0.01 | 3.44 | 0.52 | 0.03 | 0.12 | 0.75 | 1.76 | 1.75 | 0.06 | 0.07 |
| Cluster 1 | 2  | 3.41 | 0.01 | 3.38 | 0.58 | 0.03 | 0.10 | 0.73 | 1.72 | 1.78 | 0.06 | 0.07 |
| Cluster 1 | 3  | 3.52 | 0.01 | 3.49 | 0.40 | 0.02 | 0.09 | 0.65 | 1.64 | 1.64 | 0.07 | 0.08 |
| Cluster 1 | 4  | 3.25 | 0.01 | 3.24 | 0.48 | 0.02 | 0.10 | 0.70 | 1.58 | 1.58 | 0.06 | 0.07 |
| Cluster 1 | 5  | 3.21 | 0.01 | 3.19 | 0.54 | 0.03 | 0.10 | 0.70 | 1.63 | 1.71 | 0.06 | 0.07 |
| Cluster 1 | 6  | 3.50 | 0.01 | 3.39 | 0.55 | 0.03 | 0.11 | 0.68 | 1.51 | 1.56 | 0.06 | 0.07 |
| Cluster 1 | 7  | 3.32 | 0.01 | 3.25 | 0.40 | 0.03 | 0.08 | 0.64 | 1.45 | 1.64 | 0.06 | 0.07 |
| Cluster 1 | 8  | 3.28 | 0.01 | 3.27 | 0.37 | 0.02 | 0.08 | 0.61 | 1.78 | 1.75 | 0.07 | 0.08 |
| Cluster 1 | 9  | 3.45 | 0.01 | 3.44 | 0.47 | 0.03 | 0.09 | 0.72 | 1.49 | 1.64 | 0.06 | 0.08 |
| Cluster 1 | 10 | 4.00 | 0.01 | 3.99 | 0.54 | 0.03 | 0.12 | 0.81 | 1.54 | 1.60 | 0.06 | 0.07 |
| Cluster 1 | 11 | 4.59 | 0.01 | 4.57 | 0.70 | 0.03 | 0.14 | 0.97 | 1.70 | 1.63 | 0.07 | 0.08 |
| Cluster 1 | 12 | 5.92 | 0.02 | 5.92 | 1.05 | 0.05 | 0.17 | 1.28 | 1.79 | 1.86 | 0.06 | 0.07 |



|           |    |       |      |       |      |      |      |      |      |      |      |      |
|-----------|----|-------|------|-------|------|------|------|------|------|------|------|------|
| Cluster 1 | 13 | 7.26  | 0.02 | 7.25  | 1.25 | 0.05 | 0.23 | 1.57 | 1.74 | 1.93 | 0.07 | 0.08 |
| Cluster 1 | 14 | 8.45  | 0.02 | 8.45  | 1.10 | 0.05 | 0.22 | 1.81 | 1.73 | 1.84 | 0.06 | 0.07 |
| Cluster 1 | 15 | 11.94 | 0.03 | 11.94 | 1.27 | 0.06 | 0.28 | 2.10 | 1.65 | 1.84 | 0.05 | 0.07 |
| Cluster 1 | 16 | 10.20 | 0.03 | 10.20 | 1.37 | 0.06 | 0.25 | 1.93 | 1.72 | 1.80 | 0.06 | 0.07 |
| Cluster 1 | 17 | 9.85  | 0.02 | 9.85  | 1.26 | 0.05 | 0.21 | 1.82 | 2.06 | 1.84 | 0.06 | 0.08 |
| Cluster 1 | 18 | 8.17  | 0.02 | 8.17  | 1.13 | 0.05 | 0.18 | 1.58 | 1.55 | 1.62 | 0.06 | 0.08 |
| Cluster 1 | 19 | 7.21  | 0.02 | 7.21  | 0.92 | 0.04 | 0.14 | 1.55 | 1.51 | 1.56 | 0.06 | 0.07 |
| Cluster 1 | 20 | 6.53  | 0.02 | 6.53  | 0.95 | 0.04 | 0.15 | 1.44 | 1.46 | 1.54 | 0.06 | 0.07 |
| Cluster 1 | 21 | 6.21  | 0.02 | 6.21  | 0.75 | 0.04 | 0.16 | 1.25 | 1.56 | 1.58 | 0.06 | 0.07 |
| Cluster 1 | 22 | 5.94  | 0.02 | 5.94  | 0.85 | 0.04 | 0.12 | 1.26 | 1.38 | 1.51 | 0.05 | 0.07 |
| Cluster 1 | 23 | 5.46  | 0.02 | 5.46  | 0.71 | 0.04 | 0.12 | 1.06 | 1.30 | 1.34 | 0.05 | 0.06 |
| Cluster 1 | 24 | 5.36  | 0.02 | 5.36  | 0.78 | 0.04 | 0.13 | 1.09 | 1.43 | 1.44 | 0.06 | 0.08 |
| Cluster 1 | 25 | 5.43  | 0.02 | 5.43  | 0.88 | 0.04 | 0.15 | 1.13 | 1.42 | 1.47 | 0.05 | 0.08 |
| Cluster 1 | 26 | 5.77  | 0.02 | 5.77  | 0.86 | 0.05 | 0.14 | 1.16 | 1.39 | 1.56 | 0.05 | 0.07 |
| Cluster 1 | 27 | 5.63  | 0.02 | 5.63  | 0.78 | 0.03 | 0.15 | 1.18 | 1.54 | 1.39 | 0.06 | 0.07 |
| Cluster 1 | 28 | 5.27  | 0.01 | 5.27  | 0.61 | 0.03 | 0.11 | 0.93 | 1.42 | 1.42 | 0.05 | 0.07 |
| Cluster 1 | 29 | 4.81  | 0.01 | 4.81  | 0.56 | 0.03 | 0.10 | 1.01 | 1.40 | 1.36 | 0.06 | 0.07 |
| Cluster 1 | 30 | 4.67  | 0.01 | 4.67  | 0.58 | 0.03 | 0.09 | 0.93 | 1.25 | 1.26 | 0.06 | 0.07 |
| Cluster 1 | 31 | 4.79  | 0.01 | 4.79  | 0.63 | 0.03 | 0.07 | 0.95 | 1.16 | 1.33 | 0.05 | 0.07 |
| Cluster 1 | 32 | 5.31  | 0.01 | 5.31  | 0.79 | 0.04 | 0.12 | 1.27 | 1.30 | 1.29 | 0.06 | 0.07 |
| Cluster 1 | 33 | 5.15  | 0.01 | 5.15  | 0.70 | 0.04 | 0.11 | 1.09 | 1.32 | 1.22 | 0.06 | 0.06 |
| Cluster 1 | 34 | 5.24  | 0.01 | 5.24  | 0.67 | 0.04 | 0.11 | 1.04 | 1.46 | 1.32 | 0.05 | 0.06 |
| Cluster 1 | 35 | 5.24  | 0.01 | 5.24  | 0.58 | 0.04 | 0.10 | 1.05 | 1.43 | 1.40 | 0.06 | 0.07 |
| Cluster 1 | 36 | 4.26  | 0.01 | 4.26  | 0.50 | 0.02 | 0.10 | 0.93 | 1.40 | 1.42 | 0.06 | 0.06 |
| Cluster 1 | 37 | 4.86  | 0.01 | 4.86  | 0.78 | 0.04 | 0.13 | 1.02 | 1.27 | 1.25 | 0.06 | 0.06 |
| Cluster 1 | 38 | 5.49  | 0.01 | 5.49  | 0.70 | 0.04 | 0.14 | 1.10 | 1.57 | 1.45 | 0.06 | 0.07 |
| Cluster 1 | 39 | 4.84  | 0.01 | 4.84  | 0.67 | 0.04 | 0.10 | 0.95 | 1.45 | 1.33 | 0.05 | 0.06 |
| Cluster 1 | 40 | 4.80  | 0.01 | 4.80  | 0.82 | 0.04 | 0.11 | 1.00 | 1.34 | 1.36 | 0.05 | 0.06 |
| Cluster 1 | 41 | 4.68  | 0.01 | 4.68  | 0.64 | 0.03 | 0.09 | 0.93 | 1.27 | 1.25 | 0.05 | 0.06 |

|           |    |      |      |      |      |      |      |      |      |      |      |      |
|-----------|----|------|------|------|------|------|------|------|------|------|------|------|
| Cluster 1 | 42 | 4.51 | 0.01 | 4.51 | 0.59 | 0.03 | 0.10 | 0.89 | 1.19 | 1.23 | 0.05 | 0.07 |
| Cluster 1 | 43 | 4.55 | 0.01 | 4.55 | 0.67 | 0.03 | 0.09 | 0.93 | 1.25 | 1.27 | 0.05 | 0.06 |
| Cluster 1 | 44 | 4.69 | 0.01 | 4.69 | 0.66 | 0.03 | 0.09 | 1.00 | 1.20 | 1.28 | 0.05 | 0.06 |
| Cluster 1 | 45 | 4.44 | 0.01 | 4.44 | 0.73 | 0.03 | 0.08 | 1.16 | 1.23 | 1.12 | 0.06 | 0.06 |
| Cluster 1 | 46 | 4.22 | 0.01 | 4.22 | 0.59 | 0.04 | 0.08 | 0.96 | 1.23 | 1.18 | 0.06 | 0.06 |
| Cluster 1 | 47 | 3.97 | 0.01 | 3.97 | 0.57 | 0.03 | 0.10 | 0.83 | 1.33 | 1.27 | 0.06 | 0.06 |
| Cluster 1 | 48 | 3.94 | 0.01 | 3.94 | 0.57 | 0.03 | 0.07 | 0.90 | 1.32 | 1.17 | 0.05 | 0.06 |
| Cluster 1 | 49 | 3.76 | 0.01 | 3.76 | 0.50 | 0.04 | 0.07 | 0.77 | 1.26 | 1.26 | 0.05 | 0.06 |
| Cluster 1 | 50 | 4.50 | 0.01 | 4.50 | 0.69 | 0.04 | 0.11 | 0.96 | 1.33 | 1.33 | 0.06 | 0.07 |
| Cluster 1 | 51 | 4.72 | 0.01 | 4.72 | 0.77 | 0.04 | 0.10 | 1.02 | 1.17 | 1.25 | 0.05 | 0.07 |
| Cluster 1 | 52 | 4.72 | 0.01 | 4.72 | 0.67 | 0.03 | 0.11 | 1.00 | 1.48 | 1.32 | 0.06 | 0.06 |
| Cluster 1 | 53 | 4.19 | 0.01 | 4.19 | 0.56 | 0.04 | 0.11 | 0.96 | 1.40 | 1.22 | 0.06 | 0.05 |
| Cluster 1 | 54 | 3.92 | 0.01 | 3.92 | 0.60 | 0.03 | 0.10 | 0.98 | 1.41 | 1.19 | 0.05 | 0.05 |
| Cluster 1 | 55 | 3.85 | 0.01 | 3.85 | 0.60 | 0.03 | 0.10 | 1.06 | 1.29 | 1.22 | 0.05 | 0.06 |
| Cluster 1 | 56 | 3.63 | 0.01 | 3.63 | 0.53 | 0.03 | 0.08 | 0.87 | 1.32 | 1.24 | 0.05 | 0.06 |
| Cluster 1 | 57 | 3.73 | 0.01 | 3.73 | 0.47 | 0.03 | 0.08 | 0.81 | 1.13 | 1.16 | 0.06 | 0.06 |
| Cluster 1 | 58 | 3.85 | 0.01 | 3.85 | 0.69 | 0.03 | 0.08 | 0.93 | 1.21 | 1.17 | 0.05 | 0.06 |
| Cluster 1 | 59 | 4.08 | 0.01 | 4.08 | 0.52 | 0.03 | 0.09 | 0.76 | 1.32 | 1.10 | 0.05 | 0.06 |
| Cluster 1 | 65 | 3.02 | 0.01 | 3.02 | 0.59 | 0.03 | 0.07 | 0.75 | 1.18 | 1.09 | 0.05 | 0.06 |
| Cluster 1 | 66 | 3.69 | 0.01 | 3.69 | 0.59 | 0.04 | 0.07 | 0.91 | 1.22 | 1.19 | 0.06 | 0.06 |
| Cluster 1 | 67 | 3.90 | 0.01 | 3.90 | 0.57 | 0.03 | 0.06 | 0.83 | 1.15 | 1.09 | 0.05 | 0.07 |
| Cluster 1 | 68 | 3.03 | 0.01 | 3.03 | 0.48 | 0.03 | 0.04 | 0.66 | 1.42 | 1.17 | 0.06 | 0.06 |
| Cluster 1 | 69 | 3.71 | 0.01 | 3.71 | 0.49 | 0.03 | 0.06 | 0.75 | 1.24 | 1.14 | 0.06 | 0.06 |
| Cluster 1 | 70 | 3.98 | 0.01 | 3.98 | 0.69 | 0.03 | 0.08 | 0.91 | 1.34 | 1.21 | 0.06 | 0.07 |
| Cluster 1 | 71 | 4.04 | 0.01 | 4.04 | 0.56 | 0.03 | 0.09 | 0.87 | 1.29 | 1.28 | 0.05 | 0.06 |
| Cluster 1 | 72 | 4.23 | 0.01 | 4.23 | 0.68 | 0.04 | 0.08 | 0.94 | 1.08 | 1.17 | 0.05 | 0.06 |
| Cluster 1 | 73 | 4.26 | 0.01 | 4.26 | 0.59 | 0.03 | 0.07 | 0.89 | 1.12 | 1.12 | 0.05 | 0.05 |
| Cluster 6 | 0  | 4.28 | 0.01 | 4.25 | 0.45 | 0.03 | 0.11 | 0.67 | 1.62 | 1.63 | 0.06 | 0.08 |
| Cluster 6 | 1  | 4.65 | 0.01 | 4.61 | 0.45 | 0.03 | 0.12 | 0.69 | 1.61 | 1.66 | 0.06 | 0.08 |

|           |    |       |      |       |      |      |      |      |      |      |      |      |
|-----------|----|-------|------|-------|------|------|------|------|------|------|------|------|
| Cluster 6 | 2  | 4.70  | 0.01 | 4.66  | 0.50 | 0.03 | 0.12 | 0.72 | 1.69 | 1.69 | 0.06 | 0.08 |
| Cluster 6 | 3  | 4.41  | 0.01 | 4.39  | 0.48 | 0.03 | 0.12 | 0.71 | 1.74 | 1.71 | 0.07 | 0.08 |
| Cluster 6 | 4  | 4.35  | 0.01 | 4.32  | 0.48 | 0.03 | 0.11 | 0.74 | 1.69 | 1.67 | 0.06 | 0.08 |
| Cluster 6 | 5  | 4.16  | 0.01 | 4.14  | 0.51 | 0.03 | 0.11 | 0.69 | 1.64 | 1.66 | 0.07 | 0.08 |
| Cluster 6 | 6  | 4.56  | 0.01 | 4.53  | 0.50 | 0.03 | 0.10 | 0.74 | 1.60 | 1.67 | 0.07 | 0.08 |
| Cluster 6 | 7  | 4.38  | 0.01 | 4.36  | 0.46 | 0.03 | 0.10 | 0.69 | 1.60 | 1.65 | 0.06 | 0.08 |
| Cluster 6 | 8  | 4.52  | 0.01 | 4.50  | 0.49 | 0.03 | 0.11 | 0.65 | 1.58 | 1.66 | 0.06 | 0.08 |
| Cluster 6 | 9  | 4.62  | 0.01 | 4.57  | 0.47 | 0.03 | 0.12 | 0.70 | 1.69 | 1.74 | 0.06 | 0.08 |
| Cluster 6 | 10 | 5.31  | 0.01 | 5.30  | 0.60 | 0.04 | 0.16 | 0.84 | 1.91 | 1.90 | 0.07 | 0.09 |
| Cluster 6 | 11 | 6.65  | 0.02 | 6.64  | 0.80 | 0.04 | 0.19 | 1.05 | 1.82 | 2.05 | 0.07 | 0.09 |
| Cluster 6 | 12 | 7.81  | 0.02 | 7.79  | 1.11 | 0.05 | 0.23 | 1.43 | 2.12 | 2.18 | 0.07 | 0.09 |
| Cluster 6 | 13 | 8.60  | 0.02 | 8.60  | 1.19 | 0.06 | 0.22 | 1.51 | 2.17 | 2.25 | 0.07 | 0.09 |
| Cluster 6 | 14 | 9.57  | 0.02 | 9.56  | 1.17 | 0.05 | 0.21 | 1.55 | 2.19 | 2.20 | 0.07 | 0.09 |
| Cluster 6 | 15 | 12.49 | 0.03 | 12.49 | 1.42 | 0.06 | 0.28 | 2.02 | 2.47 | 2.45 | 0.07 | 0.09 |
| Cluster 6 | 16 | 11.95 | 0.03 | 11.94 | 1.34 | 0.06 | 0.25 | 1.91 | 2.27 | 2.40 | 0.07 | 0.09 |
| Cluster 6 | 17 | 11.32 | 0.02 | 11.32 | 1.28 | 0.06 | 0.25 | 1.80 | 2.32 | 2.39 | 0.07 | 0.09 |
| Cluster 6 | 18 | 9.43  | 0.02 | 9.42  | 1.16 | 0.05 | 0.21 | 1.53 | 2.25 | 2.26 | 0.07 | 0.09 |
| Cluster 6 | 19 | 8.25  | 0.02 | 8.25  | 1.04 | 0.05 | 0.21 | 1.42 | 2.31 | 2.22 | 0.07 | 0.09 |
| Cluster 6 | 20 | 8.02  | 0.02 | 8.02  | 1.01 | 0.05 | 0.20 | 1.39 | 2.14 | 2.16 | 0.07 | 0.09 |
| Cluster 6 | 21 | 7.25  | 0.02 | 7.25  | 0.85 | 0.04 | 0.16 | 1.23 | 2.06 | 2.03 | 0.07 | 0.09 |
| Cluster 6 | 22 | 7.14  | 0.02 | 7.13  | 0.85 | 0.04 | 0.16 | 1.21 | 2.04 | 2.00 | 0.07 | 0.09 |
| Cluster 6 | 23 | 7.18  | 0.02 | 7.18  | 0.87 | 0.04 | 0.17 | 1.16 | 1.99 | 2.01 | 0.07 | 0.09 |
| Cluster 6 | 24 | 7.07  | 0.02 | 7.07  | 0.87 | 0.04 | 0.16 | 1.17 | 2.11 | 1.97 | 0.07 | 0.09 |
| Cluster 6 | 25 | 6.89  | 0.02 | 6.87  | 0.81 | 0.04 | 0.16 | 1.14 | 2.00 | 1.96 | 0.07 | 0.09 |
| Cluster 6 | 26 | 7.12  | 0.02 | 7.12  | 0.86 | 0.04 | 0.16 | 1.18 | 2.00 | 1.97 | 0.07 | 0.08 |
| Cluster 6 | 27 | 7.06  | 0.02 | 7.05  | 0.81 | 0.04 | 0.15 | 1.11 | 2.05 | 1.87 | 0.07 | 0.09 |
| Cluster 6 | 28 | 6.22  | 0.02 | 6.22  | 0.74 | 0.04 | 0.14 | 1.02 | 1.85 | 1.74 | 0.07 | 0.08 |
| Cluster 6 | 29 | 6.26  | 0.01 | 6.26  | 0.75 | 0.04 | 0.13 | 1.00 | 1.80 | 1.76 | 0.07 | 0.08 |
| Cluster 6 | 30 | 6.28  | 0.01 | 6.28  | 0.76 | 0.04 | 0.13 | 1.01 | 1.87 | 1.84 | 0.07 | 0.09 |

|           |    |      |      |      |      |      |      |      |      |      |      |      |
|-----------|----|------|------|------|------|------|------|------|------|------|------|------|
| Cluster 6 | 31 | 6.38 | 0.02 | 6.38 | 0.78 | 0.04 | 0.17 | 1.06 | 1.96 | 1.98 | 0.07 | 0.09 |
| Cluster 6 | 32 | 6.70 | 0.02 | 6.70 | 0.85 | 0.04 | 0.16 | 1.14 | 1.99 | 2.01 | 0.07 | 0.09 |
| Cluster 6 | 33 | 6.50 | 0.02 | 6.50 | 0.80 | 0.04 | 0.14 | 1.11 | 1.94 | 2.03 | 0.07 | 0.09 |
| Cluster 6 | 34 | 6.36 | 0.02 | 6.36 | 0.80 | 0.04 | 0.15 | 1.05 | 1.85 | 1.96 | 0.06 | 0.09 |
| Cluster 6 | 35 | 6.10 | 0.01 | 6.10 | 0.77 | 0.04 | 0.14 | 1.01 | 1.82 | 1.87 | 0.07 | 0.09 |
| Cluster 6 | 36 | 5.74 | 0.01 | 5.74 | 0.67 | 0.04 | 0.13 | 0.90 | 1.96 | 1.94 | 0.07 | 0.08 |
| Cluster 6 | 37 | 6.39 | 0.01 | 6.39 | 0.77 | 0.04 | 0.16 | 1.03 | 2.16 | 2.02 | 0.07 | 0.09 |
| Cluster 6 | 38 | 6.68 | 0.02 | 6.68 | 0.80 | 0.04 | 0.16 | 1.10 | 2.06 | 1.97 | 0.07 | 0.09 |
| Cluster 6 | 39 | 6.32 | 0.02 | 6.32 | 0.77 | 0.04 | 0.15 | 1.04 | 2.22 | 2.07 | 0.07 | 0.09 |
| Cluster 6 | 40 | 6.41 | 0.02 | 6.41 | 0.76 | 0.04 | 0.16 | 1.05 | 2.13 | 2.03 | 0.07 | 0.09 |
| Cluster 6 | 41 | 5.98 | 0.01 | 5.98 | 0.73 | 0.04 | 0.15 | 1.03 | 1.96 | 2.00 | 0.07 | 0.09 |
| Cluster 6 | 42 | 5.74 | 0.01 | 5.74 | 0.61 | 0.04 | 0.13 | 0.92 | 1.91 | 1.88 | 0.07 | 0.08 |
| Cluster 6 | 43 | 5.92 | 0.01 | 5.92 | 0.68 | 0.04 | 0.15 | 0.96 | 1.91 | 1.95 | 0.07 | 0.08 |
| Cluster 6 | 44 | 6.39 | 0.02 | 6.39 | 0.79 | 0.04 | 0.17 | 1.15 | 2.18 | 2.15 | 0.07 | 0.09 |
| Cluster 6 | 45 | 6.09 | 0.01 | 6.09 | 0.80 | 0.04 | 0.14 | 1.11 | 1.89 | 1.93 | 0.06 | 0.08 |
| Cluster 6 | 46 | 5.74 | 0.01 | 5.74 | 0.72 | 0.04 | 0.13 | 1.00 | 1.77 | 1.77 | 0.06 | 0.07 |
| Cluster 6 | 47 | 5.85 | 0.01 | 5.85 | 0.67 | 0.04 | 0.13 | 1.02 | 1.64 | 1.74 | 0.06 | 0.08 |
| Cluster 6 | 48 | 5.44 | 0.01 | 5.44 | 0.63 | 0.04 | 0.11 | 0.92 | 1.67 | 1.65 | 0.06 | 0.07 |
| Cluster 6 | 49 | 5.47 | 0.01 | 5.47 | 0.60 | 0.04 | 0.12 | 0.91 | 1.55 | 1.64 | 0.06 | 0.07 |
| Cluster 6 | 50 | 5.71 | 0.01 | 5.71 | 0.64 | 0.04 | 0.11 | 0.92 | 1.57 | 1.60 | 0.06 | 0.07 |
| Cluster 6 | 51 | 5.91 | 0.01 | 5.91 | 0.70 | 0.04 | 0.13 | 1.01 | 1.58 | 1.61 | 0.06 | 0.07 |
| Cluster 6 | 52 | 6.02 | 0.01 | 6.02 | 0.73 | 0.04 | 0.13 | 1.01 | 1.70 | 1.63 | 0.06 | 0.07 |
| Cluster 6 | 53 | 5.82 | 0.01 | 5.82 | 0.71 | 0.04 | 0.13 | 0.97 | 1.72 | 1.67 | 0.06 | 0.07 |
| Cluster 6 | 54 | 5.46 | 0.01 | 5.45 | 0.67 | 0.04 | 0.12 | 0.95 | 1.72 | 1.63 | 0.06 | 0.07 |
| Cluster 6 | 55 | 5.18 | 0.01 | 5.18 | 0.66 | 0.04 | 0.11 | 0.93 | 1.58 | 1.53 | 0.06 | 0.07 |
| Cluster 6 | 56 | 5.03 | 0.01 | 5.03 | 0.62 | 0.04 | 0.10 | 0.85 | 1.61 | 1.49 | 0.05 | 0.07 |
| Cluster 6 | 57 | 5.17 | 0.01 | 5.17 | 0.56 | 0.04 | 0.10 | 0.86 | 1.61 | 1.52 | 0.06 | 0.07 |
| Cluster 6 | 58 | 5.23 | 0.01 | 5.22 | 0.68 | 0.04 | 0.11 | 0.91 | 1.57 | 1.51 | 0.06 | 0.07 |
| Cluster 6 | 59 | 5.19 | 0.01 | 5.19 | 0.65 | 0.04 | 0.11 | 0.88 | 1.60 | 1.51 | 0.06 | 0.07 |

|           |    |      |      |      |      |      |      |      |      |      |      |      |
|-----------|----|------|------|------|------|------|------|------|------|------|------|------|
| Cluster 6 | 65 | 3.86 | 0.01 | 3.86 | 0.65 | 0.04 | 0.09 | 0.75 | 1.45 | 1.43 | 0.06 | 0.07 |
| Cluster 6 | 66 | 5.04 | 0.01 | 5.04 | 0.63 | 0.04 | 0.10 | 0.86 | 1.45 | 1.46 | 0.06 | 0.07 |
| Cluster 6 | 67 | 5.31 | 0.01 | 5.31 | 0.65 | 0.04 | 0.11 | 0.88 | 1.46 | 1.49 | 0.06 | 0.07 |
| Cluster 6 | 68 | 3.90 | 0.01 | 3.90 | 0.62 | 0.04 | 0.09 | 0.73 | 1.38 | 1.42 | 0.06 | 0.07 |
| Cluster 6 | 69 | 4.77 | 0.01 | 4.77 | 0.60 | 0.04 | 0.11 | 0.85 | 1.44 | 1.45 | 0.06 | 0.07 |
| Cluster 6 | 70 | 4.93 | 0.01 | 4.93 | 0.63 | 0.04 | 0.11 | 0.85 | 1.38 | 1.43 | 0.06 | 0.07 |
| Cluster 6 | 71 | 4.96 | 0.01 | 4.96 | 0.59 | 0.04 | 0.12 | 0.90 | 1.41 | 1.47 | 0.06 | 0.07 |
| Cluster 6 | 72 | 5.46 | 0.01 | 5.46 | 0.65 | 0.04 | 0.13 | 0.96 | 1.41 | 1.52 | 0.06 | 0.07 |
| Cluster 6 | 73 | 5.23 | 0.01 | 5.23 | 0.61 | 0.04 | 0.12 | 0.91 | 1.55 | 1.48 | 0.06 | 0.07 |
| Cluster 3 | 0  | 2.11 | 0.01 | 2.10 | 0.22 | 0.02 | 0.02 | 0.32 | 0.73 | 0.75 | 0.04 | 0.05 |
| Cluster 3 | 1  | 2.19 | 0.01 | 2.18 | 0.20 | 0.02 | 0.02 | 0.34 | 0.77 | 0.78 | 0.05 | 0.05 |
| Cluster 3 | 2  | 2.16 | 0.01 | 2.16 | 0.21 | 0.02 | 0.02 | 0.37 | 0.78 | 0.75 | 0.04 | 0.05 |
| Cluster 3 | 3  | 2.17 | 0.01 | 2.16 | 0.21 | 0.02 | 0.02 | 0.35 | 0.76 | 0.74 | 0.04 | 0.05 |
| Cluster 3 | 4  | 2.13 | 0.01 | 2.12 | 0.21 | 0.02 | 0.02 | 0.35 | 0.74 | 0.71 | 0.05 | 0.05 |
| Cluster 3 | 5  | 2.05 | 0.01 | 2.04 | 0.20 | 0.02 | 0.02 | 0.00 | 0.66 | 0.65 | 0.05 | 0.99 |
| Cluster 3 | 6  | 2.19 | 0.01 | 2.17 | 0.22 | 0.02 | 0.02 | 0.35 | 0.70 | 0.71 | 0.04 | 0.05 |
| Cluster 3 | 7  | 2.12 | 0.01 | 2.11 | 0.20 | 0.02 | 0.02 | 0.34 | 0.78 | 0.77 | 0.05 | 0.06 |
| Cluster 3 | 8  | 2.08 | 0.01 | 2.07 | 0.20 | 0.02 | 0.02 | 0.33 | 0.81 | 0.79 | 0.05 | 0.05 |
| Cluster 3 | 9  | 2.22 | 0.01 | 2.20 | 0.20 | 0.02 | 0.02 | 0.35 | 0.71 | 0.74 | 0.05 | 0.05 |
| Cluster 3 | 10 | 2.74 | 0.01 | 2.74 | 0.28 | 0.02 | 0.02 | 0.42 | 0.73 | 0.72 | 0.05 | 0.05 |
| Cluster 3 | 11 | 3.16 | 0.01 | 3.16 | 0.27 | 0.02 | 0.03 | 0.48 | 0.71 | 0.74 | 0.05 | 0.05 |
| Cluster 3 | 12 | 3.88 | 0.01 | 3.88 | 0.38 | 0.02 | 0.04 | 0.60 | 0.72 | 0.76 | 0.05 | 0.05 |
| Cluster 3 | 13 | 4.21 | 0.01 | 4.21 | 0.44 | 0.03 | 0.04 | 0.68 | 0.83 | 0.78 | 0.05 | 0.05 |
| Cluster 3 | 14 | 4.63 | 0.01 | 4.63 | 0.43 | 0.03 | 0.04 | 0.72 | 0.79 | 0.79 | 0.04 | 0.05 |
| Cluster 3 | 15 | 5.73 | 0.01 | 5.73 | 0.45 | 0.03 | 0.05 | 0.84 | 0.83 | 0.82 | 0.05 | 0.05 |
| Cluster 3 | 16 | 5.68 | 0.01 | 5.68 | 0.42 | 0.03 | 0.04 | 0.81 | 0.79 | 0.77 | 0.05 | 0.05 |
| Cluster 3 | 17 | 5.59 | 0.01 | 5.59 | 0.45 | 0.03 | 0.04 | 0.81 | 0.78 | 0.78 | 0.05 | 0.05 |
| Cluster 3 | 18 | 4.54 | 0.01 | 4.54 | 0.37 | 0.03 | 0.03 | 0.00 | 0.70 | 0.69 | 0.05 | 0.98 |
| Cluster 3 | 19 | 3.90 | 0.01 | 3.90 | 0.32 | 0.03 | 0.03 | 0.58 | 0.72 | 0.72 | 0.04 | 0.05 |

|           |    |      |      |      |      |      |      |      |      |      |      |      |
|-----------|----|------|------|------|------|------|------|------|------|------|------|------|
| Cluster 3 | 20 | 3.66 | 0.01 | 3.66 | 0.34 | 0.03 | 0.04 | 0.57 | 0.72 | 0.72 | 0.05 | 0.05 |
| Cluster 3 | 21 | 3.37 | 0.01 | 3.37 | 0.30 | 0.02 | 0.03 | 0.52 | 0.69 | 0.70 | 0.04 | 0.05 |
| Cluster 3 | 22 | 3.30 | 0.01 | 3.30 | 0.28 | 0.02 | 0.03 | 0.52 | 0.72 | 0.70 | 0.04 | 0.05 |
| Cluster 3 | 23 | 3.19 | 0.01 | 3.19 | 0.29 | 0.02 | 0.03 | 0.50 | 0.68 | 0.67 | 0.04 | 0.05 |
| Cluster 3 | 24 | 3.19 | 0.01 | 3.19 | 0.29 | 0.02 | 0.02 | 0.49 | 0.64 | 0.64 | 0.04 | 0.05 |
| Cluster 3 | 25 | 3.15 | 0.01 | 3.15 | 0.30 | 0.02 | 0.03 | 0.48 | 0.66 | 0.66 | 0.04 | 0.05 |
| Cluster 3 | 26 | 3.20 | 0.01 | 3.20 | 0.28 | 0.03 | 0.03 | 0.49 | 0.65 | 0.66 | 0.04 | 0.05 |
| Cluster 3 | 27 | 3.13 | 0.01 | 3.13 | 0.29 | 0.02 | 0.03 | 0.49 | 0.68 | 0.66 | 0.04 | 0.05 |
| Cluster 3 | 28 | 2.87 | 0.01 | 2.87 | 0.25 | 0.02 | 0.03 | 0.44 | 0.62 | 0.63 | 0.04 | 0.05 |
| Cluster 3 | 29 | 2.89 | 0.01 | 2.89 | 0.24 | 0.02 | 0.02 | 0.45 | 0.63 | 0.66 | 0.04 | 0.05 |
| Cluster 3 | 30 | 2.91 | 0.01 | 2.91 | 0.28 | 0.02 | 0.03 | 0.44 | 0.66 | 0.67 | 0.04 | 0.05 |
| Cluster 3 | 31 | 2.81 | 0.01 | 2.81 | 0.25 | 0.02 | 0.03 | 0.42 | 0.65 | 0.66 | 0.04 | 0.05 |
| Cluster 3 | 32 | 2.96 | 0.01 | 2.96 | 0.27 | 0.02 | 0.02 | 0.46 | 0.63 | 0.65 | 0.04 | 0.05 |
| Cluster 3 | 33 | 2.91 | 0.01 | 2.91 | 0.29 | 0.02 | 0.03 | 0.48 | 0.62 | 0.64 | 0.04 | 0.05 |
| Cluster 3 | 34 | 2.86 | 0.01 | 2.86 | 0.27 | 0.02 | 0.03 | 0.44 | 0.61 | 0.64 | 0.04 | 0.05 |
| Cluster 3 | 35 | 2.77 | 0.01 | 2.77 | 0.23 | 0.02 | 0.02 | 0.42 | 0.65 | 0.64 | 0.04 | 0.05 |
| Cluster 3 | 36 | 2.51 | 0.01 | 2.51 | 0.22 | 0.02 | 0.02 | 0.39 | 0.81 | 0.76 | 0.04 | 0.05 |
| Cluster 3 | 37 | 2.77 | 0.01 | 2.77 | 0.23 | 0.02 | 0.02 | 0.43 | 0.66 | 0.65 | 0.04 | 0.05 |
| Cluster 3 | 38 | 2.82 | 0.01 | 2.82 | 0.26 | 0.02 | 0.03 | 0.46 | 0.69 | 0.67 | 0.04 | 0.04 |
| Cluster 3 | 39 | 2.65 | 0.01 | 2.65 | 0.25 | 0.02 | 0.02 | 0.43 | 0.67 | 0.67 | 0.04 | 0.05 |
| Cluster 3 | 40 | 2.73 | 0.01 | 2.73 | 0.25 | 0.02 | 0.02 | 0.42 | 0.65 | 0.66 | 0.04 | 0.05 |
| Cluster 3 | 41 | 2.62 | 0.01 | 2.62 | 0.24 | 0.02 | 0.02 | 0.43 | 0.64 | 0.64 | 0.04 | 0.05 |
| Cluster 3 | 42 | 2.52 | 0.01 | 2.52 | 0.21 | 0.02 | 0.02 | 0.41 | 0.62 | 0.63 | 0.04 | 0.05 |
| Cluster 3 | 43 | 2.62 | 0.01 | 2.62 | 0.24 | 0.02 | 0.02 | 0.40 | 0.63 | 0.65 | 0.04 | 0.05 |
| Cluster 3 | 44 | 2.66 | 0.01 | 2.66 | 0.28 | 0.02 | 0.02 | 0.46 | 0.63 | 0.63 | 0.04 | 0.05 |
| Cluster 3 | 45 | 2.61 | 0.01 | 2.61 | 0.26 | 0.02 | 0.03 | 0.46 | 0.61 | 0.64 | 0.04 | 0.04 |
| Cluster 3 | 46 | 2.40 | 0.01 | 2.40 | 0.26 | 0.02 | 0.02 | 0.40 | 0.64 | 0.64 | 0.04 | 0.05 |
| Cluster 3 | 47 | 2.46 | 0.01 | 2.46 | 0.26 | 0.02 | 0.02 | 0.43 | 0.62 | 0.62 | 0.04 | 0.05 |
| Cluster 3 | 48 | 2.36 | 0.01 | 2.36 | 0.23 | 0.02 | 0.02 | 0.38 | 0.60 | 0.60 | 0.04 | 0.05 |

|           |    |      |      |      |      |      |      |      |      |      |      |      |
|-----------|----|------|------|------|------|------|------|------|------|------|------|------|
| Cluster 3 | 49 | 2.35 | 0.01 | 2.35 | 0.20 | 0.02 | 0.03 | 0.38 | 0.66 | 0.65 | 0.04 | 0.05 |
| Cluster 3 | 50 | 2.49 | 0.01 | 2.49 | 0.22 | 0.02 | 0.02 | 0.39 | 0.64 | 0.62 | 0.04 | 0.05 |
| Cluster 3 | 51 | 2.52 | 0.01 | 2.52 | 0.24 | 0.02 | 0.02 | 0.41 | 0.60 | 0.62 | 0.04 | 0.04 |
| Cluster 3 | 52 | 2.51 | 0.01 | 2.51 | 0.25 | 0.02 | 0.02 | 0.42 | 0.59 | 0.60 | 0.04 | 0.05 |
| Cluster 3 | 53 | 2.48 | 0.01 | 2.48 | 0.24 | 0.02 | 0.02 | 0.44 | 0.61 | 0.61 | 0.04 | 0.05 |
| Cluster 3 | 54 | 2.35 | 0.01 | 2.35 | 0.24 | 0.02 | 0.02 | 0.40 | 0.60 | 0.60 | 0.04 | 0.05 |
| Cluster 3 | 55 | 2.28 | 0.01 | 2.28 | 0.24 | 0.02 | 0.02 | 0.39 | 0.63 | 0.59 | 0.04 | 0.04 |
| Cluster 3 | 56 | 2.24 | 0.01 | 2.24 | 0.22 | 0.02 | 0.02 | 0.37 | 0.61 | 0.62 | 0.04 | 0.05 |
| Cluster 3 | 57 | 2.26 | 0.01 | 2.26 | 0.21 | 0.02 | 0.02 | 0.37 | 0.64 | 0.66 | 0.04 | 0.05 |
| Cluster 3 | 58 | 2.26 | 0.01 | 2.26 | 0.21 | 0.02 | 0.02 | 0.36 | 0.60 | 0.59 | 0.04 | 0.04 |
| Cluster 3 | 59 | 2.26 | 0.01 | 2.26 | 0.22 | 0.02 | 0.02 | 0.36 | 0.60 | 0.62 | 0.04 | 0.05 |
| Cluster 3 | 65 | 1.61 | 0.00 | 1.61 | 0.23 | 0.02 | 0.02 | 0.31 | 0.56 | 0.56 | 0.04 | 0.04 |
| Cluster 3 | 66 | 2.13 | 0.01 | 2.13 | 0.21 | 0.02 | 0.02 | 0.37 | 0.59 | 0.58 | 0.04 | 0.05 |
| Cluster 3 | 67 | 2.23 | 0.01 | 2.23 | 0.21 | 0.02 | 0.02 | 0.37 | 0.56 | 0.57 | 0.04 | 0.05 |
| Cluster 3 | 68 | 1.66 | 0.00 | 1.66 | 0.21 | 0.02 | 0.01 | 0.30 | 0.58 | 0.56 | 0.04 | 0.04 |
| Cluster 3 | 69 | 2.07 | 0.01 | 2.07 | 0.21 | 0.02 | 0.02 | 0.35 | 0.58 | 0.57 | 0.04 | 0.05 |
| Cluster 3 | 70 | 2.15 | 0.01 | 2.15 | 0.20 | 0.02 | 0.01 | 0.34 | 0.56 | 0.56 | 0.04 | 0.05 |
| Cluster 3 | 71 | 2.19 | 0.01 | 2.19 | 0.18 | 0.02 | 0.02 | 0.34 | 0.55 | 0.59 | 0.04 | 0.05 |
| Cluster 3 | 72 | 2.15 | 0.01 | 2.15 | 0.21 | 0.02 | 0.02 | 0.35 | 0.56 | 0.59 | 0.04 | 0.05 |
| Cluster 3 | 73 | 2.22 | 0.01 | 2.22 | 0.22 | 0.02 | 0.02 | 0.38 | 0.57 | 0.57 | 0.04 | 0.04 |
| Cluster 5 | 0  | 3.47 | 0.01 | 3.46 | 0.47 | 0.03 | 0.09 | 0.70 | 1.17 | 1.23 | 0.05 | 0.05 |
| Cluster 5 | 1  | 3.60 | 0.01 | 3.59 | 0.43 | 0.02 | 0.10 | 0.73 | 1.09 | 1.34 | 0.05 | 0.06 |
| Cluster 5 | 2  | 3.71 | 0.01 | 3.70 | 0.45 | 0.03 | 0.09 | 0.76 | 1.07 | 1.30 | 0.04 | 0.05 |
| Cluster 5 | 3  | 3.61 | 0.01 | 3.59 | 0.40 | 0.02 | 0.08 | 0.69 | 1.30 | 1.26 | 0.05 | 0.05 |
| Cluster 5 | 4  | 3.61 | 0.01 | 3.59 | 0.45 | 0.02 | 0.10 | 0.79 | 1.26 | 1.38 | 0.05 | 0.06 |
| Cluster 5 | 5  | 3.43 | 0.01 | 3.42 | 0.46 | 0.02 | 0.08 | 0.75 | 1.09 | 1.33 | 0.04 | 0.06 |
| Cluster 5 | 6  | 3.72 | 0.01 | 3.71 | 0.48 | 0.03 | 0.09 | 0.79 | 1.10 | 1.37 | 0.04 | 0.06 |
| Cluster 5 | 7  | 3.49 | 0.01 | 3.47 | 0.40 | 0.03 | 0.08 | 0.72 | 1.16 | 1.30 | 0.05 | 0.06 |
| Cluster 5 | 8  | 3.41 | 0.01 | 3.39 | 0.41 | 0.02 | 0.08 | 0.65 | 1.09 | 1.25 | 0.05 | 0.06 |

|           |    |       |      |       |      |      |      |      |      |      |      |      |
|-----------|----|-------|------|-------|------|------|------|------|------|------|------|------|
| Cluster 5 | 9  | 3.55  | 0.01 | 3.54  | 0.42 | 0.03 | 0.08 | 0.75 | 1.14 | 1.34 | 0.04 | 0.06 |
| Cluster 5 | 10 | 4.32  | 0.01 | 4.32  | 0.51 | 0.03 | 0.09 | 0.83 | 1.10 | 1.34 | 0.05 | 0.06 |
| Cluster 5 | 11 | 5.04  | 0.01 | 5.04  | 0.66 | 0.04 | 0.11 | 1.04 | 1.01 | 1.23 | 0.04 | 0.05 |
| Cluster 5 | 12 | 6.62  | 0.02 | 6.61  | 0.97 | 0.05 | 0.16 | 1.39 | 1.22 | 1.40 | 0.05 | 0.06 |
| Cluster 5 | 13 | 7.30  | 0.02 | 7.30  | 0.98 | 0.04 | 0.15 | 1.47 | 1.12 | 1.34 | 0.04 | 0.06 |
| Cluster 5 | 14 | 8.89  | 0.02 | 8.89  | 1.00 | 0.05 | 0.20 | 1.75 | 1.17 | 1.43 | 0.05 | 0.06 |
| Cluster 5 | 15 | 11.75 | 0.02 | 11.75 | 1.13 | 0.06 | 0.25 | 2.10 | 1.43 | 1.62 | 0.04 | 0.06 |
| Cluster 5 | 16 | 10.40 | 0.02 | 10.40 | 1.14 | 0.05 | 0.18 | 1.94 | 1.32 | 1.52 | 0.04 | 0.05 |
| Cluster 5 | 17 | 10.31 | 0.02 | 10.31 | 1.03 | 0.05 | 0.19 | 2.01 | 1.36 | 1.56 | 0.04 | 0.05 |
| Cluster 5 | 18 | 8.31  | 0.02 | 8.31  | 0.91 | 0.05 | 0.16 | 1.60 | 1.20 | 1.45 | 0.05 | 0.06 |
| Cluster 5 | 19 | 7.42  | 0.02 | 7.42  | 0.84 | 0.04 | 0.14 | 1.42 | 1.21 | 1.44 | 0.04 | 0.06 |
| Cluster 5 | 20 | 7.11  | 0.02 | 7.11  | 0.80 | 0.04 | 0.14 | 1.47 | 1.15 | 1.30 | 0.05 | 0.06 |
| Cluster 5 | 21 | 6.53  | 0.02 | 6.53  | 0.71 | 0.04 | 0.12 | 1.31 | 1.03 | 1.26 | 0.04 | 0.05 |
| Cluster 5 | 22 | 6.33  | 0.02 | 6.33  | 0.67 | 0.04 | 0.11 | 1.22 | 1.00 | 1.22 | 0.04 | 0.06 |
| Cluster 5 | 23 | 6.25  | 0.02 | 6.25  | 0.69 | 0.04 | 0.11 | 1.26 | 1.06 | 1.24 | 0.04 | 0.05 |
| Cluster 5 | 24 | 6.08  | 0.02 | 6.08  | 0.64 | 0.04 | 0.12 | 1.16 | 0.97 | 1.20 | 0.04 | 0.05 |
| Cluster 5 | 25 | 5.56  | 0.01 | 5.56  | 0.63 | 0.04 | 0.11 | 1.11 | 1.05 | 1.18 | 0.04 | 0.05 |
| Cluster 5 | 26 | 6.11  | 0.02 | 6.11  | 0.58 | 0.04 | 0.11 | 1.13 | 1.11 | 1.24 | 0.04 | 0.06 |
| Cluster 5 | 27 | 5.86  | 0.02 | 5.86  | 0.59 | 0.03 | 0.12 | 1.12 | 1.02 | 1.19 | 0.04 | 0.05 |
| Cluster 5 | 28 | 5.17  | 0.01 | 5.17  | 0.52 | 0.04 | 0.10 | 0.99 | 1.00 | 1.14 | 0.04 | 0.05 |
| Cluster 5 | 29 | 5.16  | 0.01 | 5.16  | 0.56 | 0.04 | 0.10 | 1.04 | 0.96 | 1.16 | 0.04 | 0.05 |
| Cluster 5 | 30 | 4.92  | 0.01 | 4.92  | 0.53 | 0.04 | 0.09 | 0.93 | 0.98 | 1.07 | 0.04 | 0.05 |
| Cluster 5 | 31 | 4.93  | 0.01 | 4.93  | 0.60 | 0.04 | 0.09 | 1.02 | 0.99 | 1.10 | 0.04 | 0.05 |
| Cluster 5 | 32 | 5.26  | 0.01 | 5.26  | 0.61 | 0.04 | 0.09 | 1.07 | 1.00 | 1.06 | 0.04 | 0.05 |
| Cluster 5 | 33 | 5.32  | 0.01 | 5.32  | 0.55 | 0.04 | 0.07 | 1.03 | 0.90 | 1.03 | 0.04 | 0.05 |
| Cluster 5 | 34 | 5.17  | 0.01 | 5.17  | 0.60 | 0.04 | 0.09 | 1.05 | 0.86 | 1.02 | 0.04 | 0.05 |
| Cluster 5 | 35 | 4.83  | 0.01 | 4.83  | 0.52 | 0.04 | 0.08 | 0.95 | 0.90 | 1.05 | 0.04 | 0.04 |
| Cluster 5 | 36 | 4.51  | 0.01 | 4.51  | 0.47 | 0.03 | 0.07 | 0.89 | 1.00 | 1.10 | 0.04 | 0.05 |
| Cluster 5 | 37 | 5.28  | 0.01 | 5.28  | 0.57 | 0.04 | 0.10 | 1.03 | 0.97 | 1.06 | 0.04 | 0.05 |



|           |    |      |      |      |      |      |      |      |      |      |      |      |
|-----------|----|------|------|------|------|------|------|------|------|------|------|------|
| Cluster 5 | 38 | 5.43 | 0.01 | 5.43 | 0.62 | 0.04 | 0.10 | 1.13 | 0.97 | 1.10 | 0.04 | 0.05 |
| Cluster 5 | 39 | 4.99 | 0.01 | 4.99 | 0.53 | 0.04 | 0.10 | 1.03 | 1.02 | 1.12 | 0.04 | 0.05 |
| Cluster 5 | 40 | 4.96 | 0.01 | 4.96 | 0.55 | 0.04 | 0.08 | 1.04 | 0.99 | 1.04 | 0.04 | 0.04 |
| Cluster 5 | 41 | 4.55 | 0.01 | 4.55 | 0.54 | 0.03 | 0.07 | 0.96 | 0.92 | 1.00 | 0.04 | 0.05 |
| Cluster 5 | 42 | 4.28 | 0.01 | 4.28 | 0.53 | 0.04 | 0.08 | 0.92 | 0.83 | 0.98 | 0.04 | 0.04 |
| Cluster 5 | 43 | 4.58 | 0.01 | 4.58 | 0.51 | 0.04 | 0.08 | 0.97 | 0.89 | 1.03 | 0.04 | 0.04 |
| Cluster 5 | 44 | 4.88 | 0.01 | 4.88 | 0.61 | 0.04 | 0.09 | 1.15 | 0.91 | 1.12 | 0.04 | 0.05 |
| Cluster 5 | 45 | 4.71 | 0.01 | 4.71 | 0.52 | 0.03 | 0.09 | 1.05 | 0.92 | 1.04 | 0.04 | 0.05 |
| Cluster 5 | 46 | 4.36 | 0.01 | 4.36 | 0.49 | 0.03 | 0.07 | 0.97 | 0.92 | 1.00 | 0.04 | 0.04 |
| Cluster 5 | 47 | 4.43 | 0.01 | 4.43 | 0.50 | 0.03 | 0.08 | 0.96 | 0.87 | 0.97 | 0.04 | 0.05 |
| Cluster 5 | 48 | 4.02 | 0.01 | 4.02 | 0.50 | 0.03 | 0.07 | 0.93 | 0.86 | 1.02 | 0.04 | 0.05 |
| Cluster 5 | 49 | 3.94 | 0.01 | 3.94 | 0.53 | 0.03 | 0.07 | 0.95 | 0.96 | 1.06 | 0.04 | 0.05 |
| Cluster 5 | 50 | 4.36 | 0.01 | 4.36 | 0.49 | 0.04 | 0.08 | 0.93 | 0.89 | 0.99 | 0.03 | 0.04 |
| Cluster 5 | 51 | 4.84 | 0.01 | 4.84 | 0.57 | 0.04 | 0.07 | 0.95 | 0.87 | 0.98 | 0.04 | 0.05 |
| Cluster 5 | 52 | 4.80 | 0.01 | 4.80 | 0.49 | 0.03 | 0.07 | 0.93 | 0.88 | 0.98 | 0.04 | 0.05 |
| Cluster 5 | 53 | 4.49 | 0.01 | 4.49 | 0.54 | 0.03 | 0.07 | 0.95 | 0.88 | 0.97 | 0.04 | 0.05 |
| Cluster 5 | 54 | 4.06 | 0.01 | 4.06 | 0.56 | 0.04 | 0.06 | 0.94 | 0.80 | 0.92 | 0.04 | 0.05 |
| Cluster 5 | 55 | 3.93 | 0.01 | 3.93 | 0.50 | 0.03 | 0.06 | 0.93 | 0.83 | 0.93 | 0.04 | 0.04 |
| Cluster 5 | 56 | 3.78 | 0.01 | 3.78 | 0.45 | 0.03 | 0.06 | 0.88 | 0.83 | 0.91 | 0.03 | 0.04 |
| Cluster 5 | 57 | 3.79 | 0.01 | 3.79 | 0.46 | 0.03 | 0.07 | 0.86 | 0.88 | 1.00 | 0.04 | 0.05 |
| Cluster 5 | 58 | 4.13 | 0.01 | 4.13 | 0.49 | 0.03 | 0.06 | 0.89 | 0.89 | 0.96 | 0.04 | 0.05 |
| Cluster 5 | 59 | 4.05 | 0.01 | 4.05 | 0.44 | 0.03 | 0.07 | 0.90 | 0.83 | 0.95 | 0.04 | 0.05 |
| Cluster 5 | 65 | 2.84 | 0.01 | 2.84 | 0.51 | 0.03 | 0.05 | 0.73 | 0.78 | 0.94 | 0.03 | 0.04 |
| Cluster 5 | 66 | 3.66 | 0.01 | 3.66 | 0.51 | 0.03 | 0.06 | 0.84 | 0.79 | 0.92 | 0.04 | 0.04 |
| Cluster 5 | 67 | 3.94 | 0.01 | 3.94 | 0.54 | 0.03 | 0.06 | 0.92 | 0.81 | 0.95 | 0.04 | 0.05 |
| Cluster 5 | 68 | 2.88 | 0.01 | 2.88 | 0.49 | 0.03 | 0.05 | 0.70 | 0.77 | 0.91 | 0.04 | 0.05 |
| Cluster 5 | 69 | 3.43 | 0.01 | 3.43 | 0.47 | 0.04 | 0.06 | 0.76 | 0.79 | 0.94 | 0.04 | 0.05 |
| Cluster 5 | 70 | 3.53 | 0.01 | 3.53 | 0.40 | 0.03 | 0.06 | 0.74 | 0.73 | 0.86 | 0.03 | 0.04 |
| Cluster 5 | 71 | 3.86 | 0.01 | 3.86 | 0.45 | 0.03 | 0.06 | 0.76 | 0.77 | 0.94 | 0.04 | 0.04 |

|           |    |       |      |       |      |      |      |      |      |      |      |      |
|-----------|----|-------|------|-------|------|------|------|------|------|------|------|------|
| Cluster 5 | 72 | 3.81  | 0.01 | 3.81  | 0.42 | 0.03 | 0.06 | 0.81 | 0.77 | 0.91 | 0.04 | 0.05 |
| Cluster 5 | 73 | 3.79  | 0.01 | 3.79  | 0.48 | 0.03 | 0.07 | 0.83 | 0.79 | 0.97 | 0.03 | 0.05 |
| Cluster 2 | 0  | 2.91  | 0.01 | 2.87  | 0.39 | 0.02 | 0.07 | 0.53 | 1.18 | 1.20 | 0.06 | 0.07 |
| Cluster 2 | 1  | 3.05  | 0.01 | 3.00  | 0.45 | 0.03 | 0.05 | 0.59 | 1.33 | 1.16 | 0.06 | 0.07 |
| Cluster 2 | 2  | 3.16  | 0.01 | 3.14  | 0.43 | 0.03 | 0.07 | 0.54 | 1.34 | 1.16 | 0.06 | 0.07 |
| Cluster 2 | 3  | 3.12  | 0.01 | 3.08  | 0.40 | 0.03 | 0.06 | 0.53 | 1.32 | 1.17 | 0.06 | 0.07 |
| Cluster 2 | 4  | 3.10  | 0.01 | 3.08  | 0.35 | 0.03 | 0.06 | 0.53 | 1.25 | 1.17 | 0.05 | 0.07 |
| Cluster 2 | 5  | 3.00  | 0.01 | 3.00  | 0.34 | 0.02 | 0.06 | 0.48 | 1.35 | 1.24 | 0.06 | 0.07 |
| Cluster 2 | 6  | 3.32  | 0.01 | 3.28  | 0.38 | 0.03 | 0.07 | 0.55 | 1.39 | 1.20 | 0.06 | 0.06 |
| Cluster 2 | 7  | 2.94  | 0.01 | 2.90  | 0.32 | 0.02 | 0.06 | 0.47 | 1.24 | 1.09 | 0.06 | 0.07 |
| Cluster 2 | 8  | 2.98  | 0.01 | 2.97  | 0.35 | 0.02 | 0.06 | 0.51 | 1.47 | 1.16 | 0.06 | 0.07 |
| Cluster 2 | 9  | 3.22  | 0.01 | 3.18  | 0.33 | 0.02 | 0.07 | 0.55 | 1.41 | 1.23 | 0.06 | 0.07 |
| Cluster 2 | 10 | 4.25  | 0.01 | 4.25  | 0.50 | 0.03 | 0.08 | 0.66 | 1.45 | 1.29 | 0.06 | 0.07 |
| Cluster 2 | 11 | 4.90  | 0.01 | 4.90  | 0.57 | 0.04 | 0.08 | 0.73 | 1.39 | 1.16 | 0.06 | 0.07 |
| Cluster 2 | 12 | 6.29  | 0.02 | 6.28  | 0.71 | 0.04 | 0.13 | 0.98 | 1.43 | 1.35 | 0.06 | 0.07 |
| Cluster 2 | 13 | 7.04  | 0.02 | 7.04  | 0.85 | 0.04 | 0.12 | 1.13 | 1.56 | 1.36 | 0.06 | 0.07 |
| Cluster 2 | 14 | 8.13  | 0.02 | 8.13  | 0.85 | 0.04 | 0.15 | 1.28 | 1.48 | 1.29 | 0.06 | 0.06 |
| Cluster 2 | 15 | 10.84 | 0.02 | 10.84 | 0.96 | 0.04 | 0.16 | 1.62 | 1.55 | 1.31 | 0.05 | 0.06 |
| Cluster 2 | 16 | 9.71  | 0.02 | 9.71  | 0.89 | 0.04 | 0.12 | 1.46 | 1.41 | 1.24 | 0.05 | 0.06 |
| Cluster 2 | 17 | 9.44  | 0.02 | 9.44  | 0.86 | 0.05 | 0.14 | 1.38 | 1.47 | 1.26 | 0.05 | 0.06 |
| Cluster 2 | 18 | 7.84  | 0.02 | 7.84  | 0.79 | 0.04 | 0.13 | 1.17 | 1.34 | 1.23 | 0.04 | 0.06 |
| Cluster 2 | 19 | 6.55  | 0.02 | 6.55  | 0.63 | 0.04 | 0.10 | 1.02 | 1.37 | 1.21 | 0.05 | 0.06 |
| Cluster 2 | 20 | 6.19  | 0.02 | 6.19  | 0.69 | 0.03 | 0.12 | 1.02 | 1.26 | 1.17 | 0.05 | 0.06 |
| Cluster 2 | 21 | 5.69  | 0.01 | 5.69  | 0.64 | 0.04 | 0.10 | 0.95 | 1.21 | 1.07 | 0.05 | 0.06 |
| Cluster 2 | 22 | 5.72  | 0.01 | 5.72  | 0.61 | 0.04 | 0.09 | 0.85 | 1.37 | 1.19 | 0.05 | 0.06 |
| Cluster 2 | 23 | 5.56  | 0.01 | 5.56  | 0.58 | 0.03 | 0.09 | 0.89 | 1.33 | 1.13 | 0.05 | 0.06 |
| Cluster 2 | 24 | 5.25  | 0.01 | 5.25  | 0.69 | 0.03 | 0.09 | 0.91 | 1.22 | 1.02 | 0.06 | 0.06 |
| Cluster 2 | 25 | 5.20  | 0.02 | 5.20  | 0.56 | 0.03 | 0.08 | 0.87 | 1.29 | 1.15 | 0.05 | 0.06 |
| Cluster 2 | 26 | 5.48  | 0.01 | 5.48  | 0.74 | 0.03 | 0.10 | 0.89 | 1.22 | 1.18 | 0.05 | 0.06 |

|           |    |      |      |      |      |      |      |      |      |      |      |      |
|-----------|----|------|------|------|------|------|------|------|------|------|------|------|
| Cluster 2 | 27 | 5.37 | 0.01 | 5.37 | 0.55 | 0.03 | 0.10 | 0.76 | 1.22 | 1.10 | 0.05 | 0.06 |
| Cluster 2 | 28 | 4.41 | 0.01 | 4.41 | 0.48 | 0.04 | 0.08 | 0.81 | 1.15 | 1.00 | 0.06 | 0.06 |
| Cluster 2 | 29 | 4.86 | 0.01 | 4.86 | 0.46 | 0.03 | 0.07 | 0.87 | 1.15 | 1.03 | 0.05 | 0.06 |
| Cluster 2 | 30 | 4.80 | 0.01 | 4.80 | 0.67 | 0.04 | 0.08 | 0.81 | 1.24 | 1.00 | 0.05 | 0.06 |
| Cluster 2 | 31 | 4.71 | 0.01 | 4.71 | 0.54 | 0.03 | 0.07 | 0.78 | 1.13 | 1.02 | 0.05 | 0.05 |
| Cluster 2 | 32 | 5.06 | 0.01 | 5.06 | 0.57 | 0.04 | 0.09 | 0.81 | 1.18 | 1.00 | 0.05 | 0.06 |
| Cluster 2 | 33 | 4.98 | 0.01 | 4.98 | 0.52 | 0.03 | 0.08 | 0.81 | 1.19 | 0.98 | 0.05 | 0.05 |
| Cluster 2 | 34 | 4.70 | 0.01 | 4.70 | 0.53 | 0.04 | 0.07 | 0.75 | 1.24 | 0.97 | 0.04 | 0.06 |
| Cluster 2 | 35 | 4.53 | 0.01 | 4.53 | 0.51 | 0.04 | 0.07 | 0.70 | 1.08 | 0.95 | 0.04 | 0.05 |
| Cluster 2 | 36 | 4.06 | 0.01 | 4.06 | 0.35 | 0.02 | 0.05 | 0.58 | 1.40 | 1.07 | 0.05 | 0.05 |
| Cluster 2 | 37 | 4.85 | 0.01 | 4.85 | 0.49 | 0.03 | 0.07 | 0.75 | 1.21 | 0.97 | 0.05 | 0.05 |
| Cluster 2 | 38 | 5.20 | 0.01 | 5.20 | 0.56 | 0.04 | 0.08 | 0.76 | 1.14 | 0.99 | 0.05 | 0.06 |
| Cluster 2 | 39 | 4.52 | 0.01 | 4.52 | 0.52 | 0.04 | 0.07 | 0.76 | 1.19 | 0.89 | 0.05 | 0.06 |
| Cluster 2 | 40 | 4.66 | 0.01 | 4.66 | 0.56 | 0.03 | 0.06 | 0.74 | 1.18 | 0.93 | 0.05 | 0.06 |
| Cluster 2 | 41 | 4.30 | 0.01 | 4.30 | 0.44 | 0.03 | 0.05 | 0.67 | 1.15 | 0.90 | 0.05 | 0.05 |
| Cluster 2 | 42 | 4.35 | 0.01 | 4.35 | 0.49 | 0.03 | 0.08 | 0.73 | 1.13 | 0.95 | 0.05 | 0.06 |
| Cluster 2 | 43 | 4.29 | 0.01 | 4.29 | 0.46 | 0.03 | 0.05 | 0.72 | 1.00 | 0.86 | 0.05 | 0.05 |
| Cluster 2 | 44 | 4.48 | 0.01 | 4.48 | 0.48 | 0.03 | 0.07 | 0.82 | 1.19 | 0.98 | 0.05 | 0.05 |
| Cluster 2 | 45 | 4.64 | 0.01 | 4.64 | 0.49 | 0.03 | 0.06 | 0.85 | 1.09 | 0.95 | 0.05 | 0.05 |
| Cluster 2 | 46 | 4.18 | 0.01 | 4.18 | 0.47 | 0.03 | 0.07 | 0.75 | 1.21 | 0.95 | 0.05 | 0.05 |
| Cluster 2 | 47 | 4.12 | 0.01 | 4.12 | 0.49 | 0.03 | 0.07 | 0.72 | 1.14 | 0.97 | 0.05 | 0.06 |
| Cluster 2 | 48 | 3.86 | 0.01 | 3.86 | 0.50 | 0.03 | 0.07 | 0.73 | 1.03 | 0.92 | 0.05 | 0.05 |
| Cluster 2 | 49 | 3.84 | 0.01 | 3.84 | 0.48 | 0.03 | 0.06 | 0.70 | 1.26 | 0.98 | 0.05 | 0.06 |
| Cluster 2 | 50 | 4.29 | 0.01 | 4.29 | 0.51 | 0.03 | 0.05 | 0.69 | 1.17 | 0.89 | 0.04 | 0.05 |
| Cluster 2 | 51 | 4.80 | 0.01 | 4.80 | 0.46 | 0.03 | 0.07 | 0.74 | 1.18 | 0.91 | 0.05 | 0.05 |
| Cluster 2 | 52 | 4.46 | 0.01 | 4.46 | 0.48 | 0.03 | 0.07 | 0.67 | 1.15 | 0.94 | 0.04 | 0.05 |
| Cluster 2 | 53 | 4.09 | 0.01 | 4.09 | 0.40 | 0.03 | 0.06 | 0.68 | 1.06 | 0.98 | 0.04 | 0.05 |
| Cluster 2 | 54 | 3.81 | 0.01 | 3.81 | 0.44 | 0.03 | 0.06 | 0.66 | 1.09 | 0.95 | 0.05 | 0.06 |
| Cluster 2 | 55 | 3.80 | 0.01 | 3.80 | 0.44 | 0.03 | 0.06 | 0.67 | 1.06 | 0.87 | 0.05 | 0.05 |

|           |    |      |      |      |      |      |      |      |      |      |      |      |
|-----------|----|------|------|------|------|------|------|------|------|------|------|------|
| Cluster 2 | 56 | 3.57 | 0.01 | 3.57 | 0.41 | 0.03 | 0.06 | 0.62 | 1.09 | 0.93 | 0.05 | 0.06 |
| Cluster 2 | 57 | 3.55 | 0.01 | 3.55 | 0.36 | 0.02 | 0.05 | 0.61 | 1.09 | 0.89 | 0.04 | 0.05 |
| Cluster 2 | 58 | 3.84 | 0.01 | 3.84 | 0.40 | 0.02 | 0.06 | 0.61 | 1.17 | 0.96 | 0.05 | 0.06 |
| Cluster 2 | 59 | 3.82 | 0.01 | 3.82 | 0.47 | 0.03 | 0.06 | 0.63 | 1.25 | 0.94 | 0.05 | 0.06 |
| Cluster 2 | 65 | 2.69 | 0.01 | 2.69 | 0.42 | 0.02 | 0.04 | 0.54 | 1.00 | 0.82 | 0.05 | 0.06 |
| Cluster 2 | 66 | 3.50 | 0.01 | 3.50 | 0.37 | 0.03 | 0.05 | 0.57 | 1.03 | 0.90 | 0.05 | 0.06 |
| Cluster 2 | 67 | 3.73 | 0.01 | 3.73 | 0.36 | 0.03 | 0.05 | 0.64 | 0.99 | 0.91 | 0.04 | 0.05 |
| Cluster 2 | 68 | 2.78 | 0.01 | 2.78 | 0.45 | 0.03 | 0.04 | 0.56 | 1.05 | 0.89 | 0.05 | 0.06 |
| Cluster 2 | 69 | 3.22 | 0.01 | 3.22 | 0.42 | 0.03 | 0.04 | 0.64 | 1.06 | 0.88 | 0.05 | 0.05 |
| Cluster 2 | 70 | 3.31 | 0.01 | 3.31 | 0.33 | 0.02 | 0.05 | 0.54 | 0.94 | 0.84 | 0.04 | 0.06 |
| Cluster 2 | 71 | 3.45 | 0.01 | 3.45 | 0.48 | 0.03 | 0.04 | 0.63 | 1.04 | 0.87 | 0.05 | 0.05 |
| Cluster 2 | 72 | 3.49 | 0.01 | 3.49 | 0.40 | 0.03 | 0.05 | 0.65 | 1.09 | 0.85 | 0.05 | 0.05 |
| Cluster 2 | 73 | 3.53 | 0.01 | 3.53 | 0.40 | 0.02 | 0.04 | 0.67 | 1.07 | 0.83 | 0.04 | 0.05 |
